# Supplementary material for: A Mitophagy-Related Gene Signature for Subtype Identification and Prognosis Prediction of Hepatocellular Carcinoma
Source: Int J Mol Sci. 2022 Oct 12;23(20):12123. doi: 10.3390/ijms232012123 (PMC9603050; doi:10.3390/ijms232012123)
Supplement: Supplementary file 1 [file ijms-23-12123-s001.zip]

Archive with 8 entries (8 files):
- ijms-1909924-supplementary.pdf
- Table S1.xlsx
- Table S2.xlsx
- Table S3.xlsx
- Table S4.xlsx
- Table S5.xlsx
- Table S6.xlsx
- Table S7.xlsx
