# Supplementary material for: A Mitophagy-Related Gene Signature for Subtype Identification and Prognosis Prediction of Hepatocellular Carcinoma
Source: Int J Mol Sci. 2022 Oct 12;23(20):12123. doi: 10.3390/ijms232012123 (PMC9603050; doi:10.3390/ijms232012123)
Supplement: Supplementary file 1 [file ijms-23-12123-s001.zip › Table S1.xlsx]

## Sheet: Table S1
Table S1 Subtype identification of mitophage-related genes and clinical information in HCC TCGA cohort .

## Sheet: Table S1_1
Table S1_1 Lists of HCC prognostic genes.
Genes	HR	Low 95%CI	High 95%CI	cox p	log rank p
UTP11	2.77835	2.00776	3.84468	7.02265e-10	0.000103749
YBX1	2.30513	1.7638	3.01261	9.64562e-10	1.96255e-06
G6PD	1.38206	1.24255	1.53724	2.52499e-09	0.000360892
CBX2	1.5661	1.35114	1.81527	2.60037e-09	0.0125054
KPNA2	1.67457	1.40748	1.99234	6.04587e-09	5.63596e-05
SMS	2.01577	1.58658	2.56107	9.54769e-09	1.25599e-05
MED8	2.673	1.89885	3.76277	1.74636e-08	0.000345278
UCK2	1.82017	1.47689	2.24325	1.94444e-08	1.1547e-07
YARS1	2.14548	1.64336	2.80102	2.00441e-08	0.00028198
NEIL3	1.59977	1.35633	1.8869	2.42344e-08	9.62903e-06
DYNC1LI1	2.37924	1.74918	3.23625	3.34529e-08	0.000945013
PSRC1	1.63908	1.37524	1.95353	3.4248e-08	0.00133293
TRIP13	1.47365	1.28334	1.69219	3.88813e-08	4.5462e-05
KIF2C	1.43112	1.25825	1.62775	4.8362e-08	1.4466e-05
PPM1G	2.28908	1.69991	3.08245	4.90889e-08	9.49879e-05
CENPA	1.47138	1.28064	1.69052	4.98522e-08	0.00010273
PFKFB4	1.57044	1.33512	1.84724	5.0525e-08	0.00057712
CDCA8	1.4643	1.27617	1.68016	5.4558e-08	5.03406e-05
P3H1	1.9673	1.53799	2.51643	7.1566e-08	5.57817e-05
CBARP	2.8898	1.95928	4.26226	8.69333e-08	0.0134223
RUVBL1	2.10258	1.59971	2.76352	9.887e-08	0.000653446
CCT5	1.90323	1.50041	2.4142	1.13404e-07	0.00310665
LPCAT1	1.42805	1.25181	1.62911	1.14749e-07	3.89594e-07
CDC20	1.34903	1.20735	1.50734	1.23403e-07	2.27784e-06
SLC1A5	1.32461	1.1934	1.47025	1.27795e-07	7.72633e-05
SGO2	1.65758	1.37391	1.99982	1.31308e-07	0.000656305
EIF5B	2.24358	1.66076	3.03094	1.39987e-07	0.000340043
CEP55	1.44592	1.26041	1.65874	1.41377e-07	0.000576912
PIGU	1.99673	1.54271	2.58438	1.4901e-07	1.7698e-05
AKIP1	2.23103	1.6536	3.0101	1.51073e-07	0.00269472
ENO1	1.61951	1.35272	1.93891	1.52449e-07	9.75563e-05
CREG2	4.31446	2.49387	7.46411	1.71752e-07	0.00918938
MMP1	1.3543	1.20872	1.51741	1.72138e-07	0.00102032
MCM10	1.55281	1.3165	1.83154	1.74599e-07	0.000147606
SLC2A1	1.38081	1.22319	1.55873	1.8105e-07	0.00347986
TAF3	1.97617	1.5277	2.5563	2.13995e-07	0.000205758
TTK	1.4884	1.27963	1.73125	2.50268e-07	0.00435185
GNL2	2.2483	1.65156	3.06064	2.63237e-07	0.000201097
KIF18A	1.57189	1.32295	1.86767	2.72683e-07	0.00316759
KIF20A	1.436	1.25088	1.64851	2.76174e-07	0.00246376
GAS2L3	1.55695	1.31429	1.8444	3.03083e-07	0.000206524
SBK3	1.60445	1.3389	1.92267	3.03341e-07	0.045971
JPT1	1.51937	1.29403	1.78394	3.27265e-07	5.42744e-05
PRR11	1.46966	1.26772	1.70377	3.30084e-07	0.00131567
CCT4	2.2436	1.64416	3.06158	3.48559e-07	0.000371071
MED19	2.36465	1.69812	3.29281	3.49859e-07	8.42595e-05
TCOF1	1.92322	1.49389	2.47592	3.8911e-07	0.000610892
TMEM251	2.00706	1.53319	2.62738	3.97779e-07	6.61552e-06
ATIC	1.98044	1.51997	2.5804	4.16991e-07	0.00316578
SF3A3	2.17707	1.61014	2.94361	4.30994e-07	0.0031099
WDR77	2.08883	1.56948	2.78003	4.40768e-07	0.00407591
CCDC137	1.79857	1.43169	2.25945	4.58245e-07	1.30079e-06
STIP1	2.01339	1.53369	2.64313	4.65311e-07	0.00122134
DTYMK	1.71036	1.38771	2.10802	4.85363e-07	0.000492496
HILPDA	1.36587	1.20932	1.54267	5.16393e-07	3.22232e-10
MEX3A	1.45547	1.25708	1.68518	5.16611e-07	0.00261213
ZFP69B	1.98665	1.51952	2.5974	5.19011e-07	0.0125025
DLGAP5	1.42992	1.24348	1.64431	5.24156e-07	0.000646308
SEPHS1	2.23666	1.63124	3.06678	5.77759e-07	0.000398588
RAD54B	2.42885	1.71498	3.43986	5.79906e-07	0.00881059
TPX2	1.39129	1.22164	1.58451	6.44707e-07	5.33418e-05
PLK1	1.40122	1.22686	1.60036	6.50446e-07	0.00149725
RAN	1.88079	1.46636	2.41233	6.5529e-07	0.000116942
GTPBP4	1.8593	1.45588	2.37451	6.70201e-07	0.000935981
PSMD1	2.41986	1.70534	3.43377	7.44284e-07	0.000791004
BRIX1	1.97734	1.50882	2.59133	7.76319e-07	0.0114771
NDC80	1.472	1.26254	1.71622	7.94573e-07	0.00496762
NOL10	2.30724	1.65452	3.21745	8.32261e-07	0.00151068
KIAA0930	1.68729	1.37003	2.07801	8.54458e-07	0.00115713
CMSS1	1.98264	1.50845	2.60588	9.22157e-07	0.0017046
OLA1	2.01811	1.52408	2.67228	9.50719e-07	0.000544265
FARSB	2.22568	1.6162	3.06499	9.55866e-07	0.00427655
CIP2A	1.52733	1.28887	1.8099	1.00884e-06	0.00905607
PRPF19	2.61922	1.77911	3.85603	1.06356e-06	0.00739472
RANBP1	1.91884	1.47648	2.49372	1.09201e-06	8.55793e-06
ANLN	1.38143	1.21297	1.57328	1.11762e-06	0.000312423
UBE2S	1.48601	1.26656	1.74348	1.18273e-06	1.66471e-05
TTC26	1.87887	1.45673	2.42335	1.18938e-06	0.000665857
NOP56	1.70696	1.37544	2.11839	1.21457e-06	0.00140353
RAMP3	0.721315	0.632152	0.823054	1.21851e-06	0.000374319
CENPE	1.57659	1.31165	1.89504	1.23443e-06	0.00422381
GRPEL2	2.1726	1.58732	2.97368	1.26502e-06	0.00105031
HJURP	1.41888	1.2316	1.63462	1.26934e-06	0.000305539
C18orf54	1.83661	1.43593	2.34909	1.28935e-06	0.000376201
RRP8	3.20796	2.0009	5.14317	1.29908e-06	0.0125734
KIAA1841	1.87528	1.45371	2.41911	1.30147e-06	0.000267042
EZH2	1.54621	1.29524	1.84582	1.41593e-06	6.67021e-05
FAM72D	2.05156	1.53102	2.74908	1.49135e-06	0.00614883
SLC16A3	1.31082	1.17396	1.46363	1.50313e-06	1.31036e-05
IMPDH1	1.37211	1.20601	1.56108	1.54483e-06	5.6372e-05
SF3B4	1.72412	1.38027	2.15362	1.58884e-06	0.00119417
MRPL9	1.79003	1.41117	2.27061	1.59842e-06	0.00558505
ERCC6L	1.68363	1.36088	2.08294	1.60599e-06	0.0012393
EIF2B4	2.41319	1.68246	3.46131	1.69339e-06	0.000155909
RTN3	1.96993	1.4922	2.6006	1.71464e-06	0.000369437
ZBTB8OS	2.24993	1.61382	3.13677	1.72788e-06	0.000104878
EIF2B5	2.56025	1.74091	3.76522	1.77735e-06	0.000268981
MACIR	1.38263	1.21029	1.57952	1.84472e-06	0.00189193
NDC1	1.73883	1.38507	2.18293	1.87084e-06	0.000213955
HDAC2	1.82792	1.42637	2.34252	1.87862e-06	3.70644e-05
CCNB1	1.39817	1.21812	1.60482	1.88486e-06	0.000470955
LDHA	1.76966	1.3989	2.23868	1.95107e-06	0.000257882
RBM45	2.74865	1.81215	4.16913	1.96514e-06	0.000615468
CDCA2	1.50073	1.26955	1.77402	1.97371e-06	0.000824503
CEBPZOS	2.08931	1.54113	2.83248	2.07907e-06	0.0010089
DCAF13	1.74997	1.38853	2.2055	2.12855e-06	0.00916662
SUV39H2	1.84479	1.43216	2.37631	2.13167e-06	0.00222616
ZNF408	2.26746	1.61564	3.18226	2.19984e-06	0.000387135
MRGBP	1.99103	1.49658	2.64883	2.26578e-06	0.000605688
NCAPG	1.41684	1.22622	1.63709	2.28619e-06	0.00167377
MRTO4	1.912	1.4611	2.50205	2.32206e-06	1.88371e-05
CLEC3B	0.728796	0.639118	0.831057	2.33209e-06	1.68403e-07
SPC25	1.46209	1.24878	1.71184	2.34421e-06	0.000142817
CAD	1.63058	1.33094	1.99767	2.36365e-06	0.00720227
AKNAD1	121.296	16.535	889.789	2.36675e-06	0.000179318
TUBG1	1.66669	1.34797	2.06078	2.38905e-06	1.16732e-05
ADSL	1.94114	1.47334	2.55749	2.42376e-06	0.011609
TMEM106C	1.56692	1.3	1.88866	2.43521e-06	1.16934e-05
CCT2	1.91094	1.45953	2.50198	2.47757e-06	0.0166768
TMEM237	1.67249	1.35016	2.07177	2.49636e-06	0.000978656
EIF3B	1.82589	1.42091	2.3463	2.53085e-06	0.00715641
ADAMTS5	1.61418	1.32214	1.97072	2.57036e-06	0.000234489
DCUN1D5	1.86453	1.43803	2.41754	2.58669e-06	0.00120758
ADPRS	1.84985	1.4312	2.39098	2.62183e-06	0.00137342
CENPO	1.60785	1.31884	1.9602	2.63467e-06	0.0118294
ZNF239	1.44489	1.2391	1.68486	2.66958e-06	0.00384618
COMMD3	2.29207	1.62051	3.24193	2.74683e-06	9.0699e-05
FAM72C	2.27653	1.61407	3.21089	2.75098e-06	0.000934153
HMMR	1.40787	1.22009	1.62456	2.82177e-06	0.000155968
NCL	2.05178	1.51804	2.77318	2.93382e-06	0.00710135
DBF4	1.75305	1.38539	2.2183	2.94912e-06	0.000791773
SPINDOC	1.51683	1.27344	1.80674	3.03066e-06	0.000898594
SLC29A3	1.88095	1.44233	2.45297	3.10835e-06	2.02003e-05
KDM1A	1.8736	1.43894	2.43956	3.13047e-06	0.00122545
SMG5	1.76371	1.38896	2.23957	3.22533e-06	1.07585e-05
RBM17	1.89963	1.44964	2.4893	3.28833e-06	0.000383191
PSMD14	1.92987	1.46282	2.54604	3.31202e-06	0.00237339
PTDSS2	1.64041	1.33145	2.02107	3.34142e-06	4.29703e-05
NKAIN1	2.29627	1.61707	3.26074	3.38019e-06	0.0357214
CFL1	2.0658	1.52061	2.80645	3.46912e-06	0.0477024
CHEK1	1.58784	1.30588	1.93069	3.56114e-06	0.000248415
MUTYH	1.80532	1.40612	2.31785	3.60288e-06	5.32481e-05
SOCS2	0.691685	0.591793	0.80844	3.61983e-06	5.64132e-05
FAM72A	2.25029	1.59649	3.17184	3.63648e-06	0.000199171
ARHGAP39	1.631	1.3259	2.00631	3.66428e-06	0.000213535
CSTF2	1.62695	1.32398	1.99926	3.67102e-06	3.41576e-05
SPP1	1.12851	1.07215	1.18782	3.73891e-06	2.63395e-05
SKA1	1.36892	1.19766	1.56467	4.12447e-06	0.000156718
EPO	1.20723	1.1142	1.30803	4.16975e-06	0.00650749
PTTG1	1.35517	1.19063	1.54245	4.18696e-06	4.70471e-05
CCT3	1.84709	1.42216	2.399	4.22168e-06	5.32229e-05
THOC5	1.95721	1.47014	2.60567	4.23941e-06	0.01066
TREM1	1.38858	1.20695	1.59753	4.43603e-06	0.0212489
ACYP1	1.73822	1.37268	2.20109	4.44003e-06	0.000109693
AUNIP	1.7096	1.35953	2.1498	4.48974e-06	2.2815e-05
ZC2HC1A	1.54656	1.28366	1.8633	4.49882e-06	0.00033801
MYBL2	1.25461	1.13866	1.38237	4.55217e-06	0.00235748
RRAGC	1.73982	1.3729	2.20482	4.59616e-06	0.000785514
DPH2	1.77444	1.3883	2.26799	4.64635e-06	8.30469e-05
BIRC5	1.32039	1.17232	1.48717	4.65752e-06	0.000168191
PA2G4	2.09379	1.52594	2.87296	4.69207e-06	0.000315857
NOP58	1.95437	1.46672	2.60415	4.75312e-06	0.000238678
SGO1	1.48386	1.25257	1.75787	5.00356e-06	9.57971e-05
TOE1	1.97262	1.47329	2.64119	5.0631e-06	0.000853954
TUBA1C	1.52955	1.27429	1.83594	5.06749e-06	3.31335e-05
GINS1	1.38455	1.20381	1.59243	5.13891e-06	0.000768986
PES1	1.84334	1.41715	2.39772	5.14433e-06	9.96643e-05
BUB1	1.41941	1.22096	1.65012	5.16362e-06	0.000485337
PBK	1.34988	1.1865	1.53576	5.16403e-06	0.0036872
GLMN	1.9074	1.44471	2.51826	5.22889e-06	0.0180342
NUF2	1.35998	1.19146	1.55235	5.23358e-06	0.000582945
GTSE1	1.39869	1.21066	1.61592	5.23468e-06	0.0221653
CDCA3	1.45704	1.23912	1.71328	5.26793e-06	0.00814926
SLC41A3	1.95827	1.46611	2.61563	5.34318e-06	1.04034e-05
DHX34	1.84649	1.41782	2.40476	5.3592e-06	0.00130921
HAVCR1	1.29683	1.15942	1.45053	5.40711e-06	0.0433325
SLC52A2	1.48815	1.25343	1.76683	5.64849e-06	3.31876e-05
CENPI	1.54319	1.27941	1.86135	5.72603e-06	0.00331211
SFPQ	1.84274	1.41494	2.39987	5.75614e-06	0.000939653
EEF1E1	1.59408	1.30271	1.95061	5.96041e-06	3.58969e-07
CCDC77	1.85177	1.41798	2.41827	6.05643e-06	0.00163453
GPSM2	1.5707	1.29155	1.91018	6.11058e-06	0.000539991
WDR53	2.10063	1.52166	2.89988	6.4278e-06	6.44001e-05
DEPDC1	1.40027	1.20975	1.62081	6.43213e-06	0.000326629
RARS1	2.30864	1.60495	3.32085	6.47018e-06	0.000195664
HDAC1	1.82763	1.40631	2.37517	6.47728e-06	0.00375992
MTMR2	1.56823	1.28967	1.90697	6.50036e-06	0.000190344
TPD52L2	1.77588	1.38328	2.2799	6.62618e-06	0.00491537
SAP30	1.6414	1.32305	2.03635	6.64631e-06	0.00821707
MCM6	1.45396	1.23527	1.71137	6.77599e-06	0.00259775
GEMIN2	1.92166	1.44588	2.554	6.78437e-06	8.71802e-05
BFSP1	1.85571	1.41747	2.42946	6.85577e-06	0.00240808
CLSPN	1.51181	1.26265	1.81013	6.8597e-06	0.00189046
LIMS2	0.667791	0.559932	0.796427	7.03993e-06	0.000530993
VPS72	1.68179	1.34048	2.10999	7.05585e-06	0.00132961
CCT7	2.11889	1.52693	2.94035	7.05627e-06	0.00228133
SSRP1	1.8392	1.40973	2.3995	7.09244e-06	0.00109558
TRIM36	1.85331	1.41579	2.42605	7.10377e-06	0.00702102
ELOVL1	1.77709	1.38253	2.28425	7.16603e-06	0.000232327
CHORDC1	1.73183	1.36236	2.20151	7.2717e-06	0.00104057
BEND3	1.69854	1.34731	2.14133	7.38929e-06	0.0103939
ERGIC3	2.23809	1.57296	3.18447	7.55767e-06	9.12889e-06
TIGD4	5.00824	2.4725	10.1446	7.69384e-06	0.0191536
PLOD2	1.4588	1.23636	1.72127	7.69547e-06	0.00207608
CCDC192	2.53838	1.68771	3.81783	7.7063e-06	0.00981958
PPAT	1.74479	1.36701	2.22696	7.7807e-06	0.000714124
POLR1G	1.6914	1.34319	2.1299	7.87332e-06	0.00213753
TMEM69	1.8168	1.39761	2.36171	8.14579e-06	0.0147797
NME6	2.06341	1.4997	2.83902	8.61997e-06	0.00098739
ETV5	1.47051	1.2407	1.74289	8.6876e-06	0.00429137
CTSV	1.28671	1.15138	1.43796	8.74835e-06	0.00751555
PSMA1	2.36464	1.618	3.45584	8.76846e-06	0.000352811
WDR4	1.73713	1.36173	2.21601	8.77031e-06	0.00338434
STC2	1.3253	1.17033	1.50078	9.03208e-06	0.0145818
SLC7A11	1.30257	1.15907	1.46382	9.04286e-06	0.00177801
HDGF	2.03789	1.488	2.791	9.126e-06	0.00117415
PHOSPHO2	1.88776	1.42574	2.49949	9.13842e-06	0.0003004
MELK	1.36185	1.18811	1.561	9.19643e-06	0.000332005
RP5-864K19-6	57.3085	9.56678	343.299	9.31554e-06	2.20366e-05
E2F5	1.55509	1.27908	1.89065	9.46363e-06	0.00191803
TRAPPC4	1.80868	1.39137	2.35117	9.51998e-06	0.000970932
NUP85	1.803	1.38881	2.34071	9.58198e-06	6.33825e-05
ADH4	0.894174	0.850936	0.939608	9.71995e-06	0.000162342
CCNF	1.51915	1.26209	1.82857	9.82965e-06	0.000289224
TONSL	1.57422	1.2873	1.92509	9.86963e-06	0.000524672
LCAT	0.784579	0.704541	0.873708	9.90672e-06	6.14908e-05
FUNDC2	1.67221	1.33121	2.10055	9.93032e-06	0.000171468
IQGAP3	1.38625	1.19917	1.60252	1.00736e-05	0.00624015
ANKRD13B	1.52457	1.26427	1.83846	1.01057e-05	0.003391
MED10	1.70086	1.34357	2.15317	1.0117e-05	7.14787e-06
LSM10	2.10796	1.51351	2.93589	1.02504e-05	0.00233988
ORC6	1.46881	1.23817	1.74242	1.02794e-05	0.00790752
RRP12	1.68894	1.33787	2.13213	1.04208e-05	0.00775024
SMOX	1.35853	1.18546	1.55687	1.04849e-05	0.000476906
LMNB2	1.46142	1.23444	1.73012	1.05457e-05	0.030767
MIX23	2.07985	1.50154	2.88088	1.05614e-05	0.000720652
REXO4	1.95573	1.45102	2.63601	1.06137e-05	0.000613102
STMN1	1.38475	1.1979	1.60075	1.07434e-05	0.00182579
YWHAB	1.96716	1.45543	2.65881	1.07566e-05	0.0139392
FTCD	0.851885	0.793152	0.914967	1.09168e-05	0.000208993
EXO1	1.43392	1.22112	1.6838	1.09628e-05	3.28525e-05
BCL2L2-PABPN1	2.41844	1.63141	3.58516	1.09907e-05	2.11667e-06
RNF2	1.6613	1.32448	2.08378	1.12943e-05	0.00616841
ORC1	1.41133	1.21009	1.64604	1.13635e-05	0.00175099
TARS1	1.79235	1.38119	2.3259	1.13853e-05	0.00160681
TIMM23	2.33776	1.5999	3.41593	1.14091e-05	2.29955e-06
ZSCAN20	2.3968	1.62134	3.54315	1.17011e-05	0.00572455
SLC66A1	1.77855	1.3743	2.30173	1.20541e-05	0.000331231
WDCP	2.01093	1.47071	2.74959	1.20564e-05	0.0102653
KIF4A	1.32332	1.16727	1.50022	1.20852e-05	0.00275645
CENPL	1.55279	1.275	1.89111	1.21047e-05	0.000265803
YIF1B	1.79521	1.38093	2.33378	1.23665e-05	0.000571103
PGD	1.52027	1.2599	1.83445	1.24029e-05	0.00147511
ABCF2	1.90787	1.42795	2.54909	1.24426e-05	0.0388944
PDSS1	1.68771	1.33457	2.13428	1.24508e-05	0.00857775
ZWINT	1.36562	1.18742	1.57056	1.25428e-05	0.000560354
ANP32B	1.8382	1.39862	2.41593	1.26621e-05	0.00799333
FAM72B	2.01317	1.47037	2.75633	1.27203e-05	0.00509893
METTL6	2.14734	1.5235	3.02661	1.27595e-05	0.00440716
AMD1	1.70195	1.34014	2.16144	1.29548e-05	2.45853e-05
PPIH	1.70495	1.34132	2.16716	1.30505e-05	3.42531e-05
LLPH	2.33466	1.59464	3.41809	1.30569e-05	4.02533e-05
MAFG	1.54318	1.26967	1.87561	1.30892e-05	0.000284922
PFN2	1.2561	1.13367	1.39175	1.31454e-05	0.00202444
TRIM54	1.2769	1.14392	1.42535	1.32293e-05	0.00295449
B3GAT3	1.75986	1.36456	2.26967	1.33281e-05	5.2615e-07
SRRT	2.05925	1.48756	2.85063	1.33986e-05	0.0106493
PDRG1	1.79599	1.37978	2.33774	1.34093e-05	0.00563911
PRDX1	1.75241	1.36112	2.25619	1.35314e-05	0.000649436
SKA3	1.41552	1.21035	1.65546	1.36401e-05	0.00222044
FSD1L	2.01561	1.46968	2.76434	1.367e-05	0.0342297
TRNP1	1.2173	1.11406	1.33011	1.37043e-05	0.0141958
ANAPC7	1.92713	1.43381	2.5902	1.37182e-05	0.00185017
BRK1	2.23752	1.5562	3.21713	1.38017e-05	0.0023755
GNPDA1	1.54993	1.2719	1.88874	1.39644e-05	0.000819037
CYP26B1	1.32432	1.16668	1.50327	1.39897e-05	0.0337284
KIF15	1.41879	1.21161	1.6614	1.40432e-05	0.000575953
MBOAT7	1.75509	1.36139	2.26264	1.42237e-05	0.00189015
CCDC127	1.95506	1.44309	2.64867	1.50749e-05	0.000560868
GPRIN1	1.45028	1.22551	1.71629	1.51384e-05	0.00120529
FBXO5	1.52981	1.26166	1.85496	1.53389e-05	0.000720235
AHSA1	2.05175	1.48126	2.84195	1.53516e-05	2.40166e-05
C1orf216	1.63906	1.31006	2.05068	1.54256e-05	0.00947136
BOD1	1.99287	1.45765	2.72463	1.55022e-05	0.00502519
KIF18B	1.33847	1.17263	1.52778	1.56452e-05	0.00608006
RIT1	1.63458	1.30786	2.04291	1.56754e-05	0.00350437
RNF145	1.47341	1.23569	1.75686	1.57875e-05	2.14737e-05
UBE2E1	1.83411	1.3925	2.41578	1.58994e-05	0.000147867
DDIAS	1.72437	1.34631	2.20861	1.5973e-05	0.0106976
CDCA4	1.51031	1.25233	1.82144	1.60099e-05	0.00268421
ZCRB1	2.11222	1.50338	2.96763	1.63173e-05	0.000362919
CDK1	1.32749	1.16695	1.51011	1.65055e-05	5.26848e-05
TYW3	1.86711	1.40529	2.48069	1.65551e-05	0.000336405
EID3	1.65157	1.31427	2.07543	1.67264e-05	0.0243925
GTF2H1	1.99937	1.45843	2.74094	1.67396e-05	0.000121248
UQCRH	1.70698	1.33784	2.17797	1.69977e-05	0.000467781
SSR3	1.99663	1.45695	2.73622	1.70188e-05	0.00055924
MARS1	1.83657	1.39213	2.42289	1.70538e-05	0.00752558
METTL21A	1.99967	1.45744	2.74364	1.75436e-05	0.000890742
GDI2	2.11475	1.50237	2.97673	1.7594e-05	0.00319302
PRELID2	1.70746	1.33727	2.18013	1.77981e-05	0.00169831
CKS2	1.44541	1.22147	1.7104	1.79278e-05	0.00389609
RAB5IF	1.69855	1.33335	2.16379	1.79323e-05	1.77823e-05
ATP1B3	1.38139	1.19168	1.60131	1.81507e-05	1.52862e-05
ABCC5	1.71885	1.34135	2.2026	1.8601e-05	2.13304e-06
EIF3M	2.21026	1.53697	3.17849	1.87943e-05	0.000270005
RAD54L	1.3757	1.18866	1.59216	1.88576e-05	0.000326913
ZDHHC18	1.88279	1.40892	2.51602	1.8897e-05	5.18006e-05
HOXD10	1.5462	1.26627	1.88801	1.89712e-05	0.00453728
KIF23	1.37632	1.18881	1.5934	1.91602e-05	0.0140938
SSB	1.80687	1.37703	2.3709	1.97181e-05	0.00706712
RAE1	1.90109	1.4153	2.55364	1.9816e-05	0.000567508
IQCC	1.7283	1.34419	2.22217	1.98586e-05	0.000583119
SLC35F6	1.7312	1.34532	2.22776	1.99565e-05	0.00097481
MAD2L1	1.43619	1.216	1.69625	2.01589e-05	0.01571
FAM24B	1.46339	1.22832	1.74343	2.02734e-05	0.00162414
CDC45	1.38098	1.19046	1.602	2.02945e-05	0.00343968
WDHD1	1.51789	1.25275	1.83914	2.03959e-05	0.00208204
CDCA5	1.36627	1.18351	1.57725	2.04765e-05	0.00133834
EFTUD2	1.79011	1.36931	2.34022	2.05456e-05	6.53966e-05
SLC39A1	1.65644	1.3131	2.08957	2.0599e-05	0.00378503
WDR75	1.87831	1.40518	2.51074	2.06911e-05	0.0445969
TXNL4A	1.84495	1.3916	2.44599	2.07435e-05	0.00504997
MGMT	0.635051	0.51521	0.782767	2.08721e-05	0.00492699
FABP6	1.32574	1.16427	1.5096	2.08806e-05	0.00276299
TMEM115	2.27801	1.55906	3.32851	2.08893e-05	5.96757e-06
CDC25A	1.43074	1.21291	1.68768	2.13227e-05	0.000392677
SPATS2	1.56833	1.2743	1.93021	2.15419e-05	0.000296914
EIF2B1	2.25001	1.54762	3.27117	2.1638e-05	0.00222926
PSMB2	1.97492	1.44243	2.70397	2.18436e-05	0.00176587
HMGA1	1.35233	1.17641	1.55456	2.18689e-05	0.0014148
KIFC1	1.30981	1.15635	1.48365	2.18961e-05	2.01891e-05
CKLF	1.59776	1.28684	1.98379	2.19596e-05	0.000104825
EIF2S2	1.98958	1.44794	2.73384	2.20695e-05	0.00159015
UBE2C	1.27504	1.13959	1.42659	2.23281e-05	0.0315366
MARCKSL1	1.34761	1.17389	1.54702	2.2654e-05	0.00055568
CBX3	1.7356	1.34481	2.23994	2.27371e-05	0.0010261
RPF2	1.89834	1.41114	2.55375	2.27659e-05	0.0311991
ATG101	1.96271	1.43659	2.68152	2.28226e-05	1.9869e-05
CWC27	1.96659	1.43759	2.69026	2.33305e-05	0.00602215
POLR3G	1.81109	1.37542	2.38477	2.33306e-05	0.00594223
ATP13A2	1.51525	1.24973	1.83717	2.35756e-05	0.000696163
TRMT6	1.79755	1.36957	2.35928	2.37106e-05	0.00759792
SAC3D1	1.60675	1.28958	2.00193	2.37153e-05	4.596e-06
ISG20L2	1.77705	1.36112	2.32007	2.37743e-05	0.000504632
DNASE1L3	0.781498	0.697061	0.876164	2.37785e-05	4.04436e-06
ECT2	1.33593	1.16797	1.52804	2.3897e-05	0.00252847
NPM1	1.64857	1.30724	2.07903	2.40545e-05	5.89746e-05
NCBP2	1.79197	1.36696	2.34913	2.41074e-05	0.00334543
TMEM234	1.76615	1.35633	2.2998	2.41615e-05	0.00508011
ADA	1.54037	1.26042	1.88249	2.42599e-05	0.0158557
MSANTD3	1.60088	1.2867	1.99177	2.42688e-05	1.86606e-05
ST6GALNAC4	1.42194	1.20745	1.67452	2.44707e-05	0.00469743
GNG5	1.83566	1.38435	2.4341	2.45412e-05	0.00335372
CFHR4	0.839234	0.773611	0.910425	2.4543e-05	0.000307308
RACGAP1	1.40442	1.19939	1.64451	2.46522e-05	0.000811387
CDK4	1.50314	1.24378	1.81659	2.47061e-05	7.85311e-05
MCM2	1.33451	1.16697	1.5261	2.48731e-05	0.0010758
TPM3	1.75864	1.35266	2.28646	2.49008e-05	0.00117487
KTI12	1.99761	1.44799	2.75587	2.50117e-05	0.00155001
CLCN2	1.59809	1.28489	1.98763	2.52794e-05	0.000116012
DNTTIP2	2.06298	1.47272	2.88981	2.54132e-05	0.00273694
SNRPA	1.70197	1.3287	2.18011	2.5559e-05	0.000117125
RAB32	1.57861	1.27626	1.9526	2.56918e-05	5.43443e-05
CDC25B	1.42207	1.20686	1.67564	2.60054e-05	0.00266732
DENR	1.91194	1.41338	2.58636	2.61826e-05	0.00117984
CCDC34	1.43687	1.21345	1.70144	2.62705e-05	0.000315999
GPATCH3	1.95243	1.42901	2.66758	2.64753e-05	0.0161845
CALCR	1.69636	1.32552	2.17096	2.681e-05	0.0156909
ERI3	1.89176	1.40483	2.54747	2.68468e-05	0.00295169
GPATCH4	1.70068	1.32727	2.17914	2.68842e-05	0.00172238
CIT	1.53663	1.25727	1.87806	2.7135e-05	4.17399e-05
PON1	0.866954	0.811026	0.926739	2.71538e-05	0.0013474
MTFR2	1.49614	1.23933	1.80616	2.75076e-05	0.00272939
RBM19	2.06388	1.47069	2.89634	2.7769e-05	0.00280587
AP5Z1	1.76178	1.35174	2.2962	2.79386e-05	0.00410337
POLR2G	2.03396	1.45909	2.83534	2.79938e-05	0.00112809
MAMSTR	1.44375	1.21582	1.71442	2.8023e-05	0.0133811
MKI67	1.32258	1.16039	1.50743	2.80674e-05	0.000305247
H2AZ1	1.50696	1.24367	1.82598	2.84272e-05	0.000101488
E2F6	1.81749	1.37381	2.40446	2.86307e-05	0.00367675
SPDL1	1.54439	1.2598	1.89328	2.88437e-05	0.000434961
NUP43	1.77135	1.35501	2.31563	2.88566e-05	0.00480078
KIF11	1.37772	1.18558	1.60099	2.89679e-05	0.0002036
GARS1	1.7515	1.34635	2.27859	2.97224e-05	0.00505689
NUP155	1.65808	1.30767	2.10239	2.98657e-05	0.000763244
BUB1B	1.34843	1.17173	1.55178	3.0269e-05	0.00159087
CDC123	1.78286	1.35871	2.33943	3.02861e-05	0.00723993
NABP2	1.71295	1.33018	2.20585	3.03046e-05	6.53232e-05
CAPN10	1.9296	1.41684	2.62794	3.03519e-05	4.67936e-05
UBE2L3	1.95551	1.42671	2.68031	3.05706e-05	0.00659072
FAM136A	1.8267	1.37575	2.42546	3.11012e-05	0.00391369
FZD7	1.32472	1.16051	1.51217	3.12057e-05	0.00464802
SRPRB	2.15593	1.5017	3.09517	3.13143e-05	0.00227426
CHAC2	1.7605	1.34891	2.29769	3.1446e-05	0.0159627
ITGB1BP1	1.66682	1.31012	2.12065	3.20327e-05	0.0010193
SEC61A1	1.802	1.36519	2.37859	3.2142e-05	2.25555e-05
LDAH	1.92309	1.41258	2.6181	3.26232e-05	0.000185445
ZNF485	1.80209	1.36489	2.37933	3.2659e-05	0.0312994
RNASEH1	1.94353	1.42018	2.65974	3.30372e-05	0.000461859
E2F2	1.51606	1.24555	1.84533	3.33058e-05	6.48291e-05
P2RY6	1.40834	1.19799	1.65564	3.34604e-05	0.0470122
PPT1	1.53498	1.25343	1.87978	3.4016e-05	0.00288418
PET117	1.76055	1.34737	2.30044	3.40206e-05	0.00466822
RBM22	2.29557	1.5496	3.40065	3.40675e-05	0.0485286
BTF3L4	1.76892	1.35064	2.31674	3.41899e-05	0.0083635
NAP1L1	1.52416	1.24863	1.86049	3.43374e-05	0.00234283
NAT10	1.89703	1.40074	2.56916	3.50634e-05	0.000364079
CDT1	1.31429	1.15464	1.49601	3.53388e-05	0.000638772
CCNA2	1.27067	1.13431	1.42343	3.53769e-05	0.00519864
RAD1	1.76951	1.35008	2.31923	3.55569e-05	0.00101698
SAE1	1.66497	1.30748	2.1202	3.56554e-05	0.000132921
PAK1IP1	1.73069	1.33428	2.24488	3.58286e-05	0.0107338
PCBP2	1.9567	1.42305	2.69048	3.60724e-05	0.000710384
GOT2	0.642507	0.520813	0.792637	3.64286e-05	0.000957639
NAP1L4	1.95343	1.42153	2.68436	3.646e-05	0.000413269
PSMC3IP	1.52379	1.24756	1.86117	3.66704e-05	0.00217772
RNF220	1.95153	1.42034	2.68137	3.71373e-05	0.0209567
DYNLL1	1.98715	1.43372	2.75422	3.73739e-05	0.000305338
CSE1L	1.74868	1.34058	2.281	3.762e-05	0.00152788
UPF3B	1.60068	1.27982	2.00199	3.76437e-05	6.20529e-05
DHDH	1.35424	1.17237	1.56432	3.76652e-05	0.000190977
ATP6V0B	1.79907	1.36059	2.37885	3.78212e-05	0.000340342
GMPS	1.67928	1.31231	2.14888	3.78377e-05	0.0360304
FOXK2	1.70753	1.32382	2.20245	3.78682e-05	0.00428015
TACC3	1.37591	1.18211	1.60147	3.79072e-05	0.0104652
FANCE	1.47246	1.22488	1.77008	3.79611e-05	0.000451581
RRM2	1.32828	1.1604	1.52045	3.82536e-05	0.00189467
SAMD13	1.76667	1.34731	2.31657	3.85381e-05	3.73438e-06
HTRA2	2.12712	1.48492	3.04706	3.85558e-05	0.00657935
MRPL53	1.87439	1.38966	2.5282	3.86531e-05	1.19771e-05
JMJD6	1.72798	1.3317	2.24218	3.86791e-05	0.014106
FTSJ3	1.85072	1.38032	2.48142	3.88592e-05	0.000655271
HSPA14	1.77387	1.34973	2.33129	3.93808e-05	0.00305607
TMEM67	1.73939	1.33575	2.26499	3.97508e-05	0.0467122
COLGALT1	1.6515	1.29985	2.09828	4.01315e-05	0.000223265
SHCBP1	1.37404	1.18061	1.59918	4.04964e-05	0.0170608
CDC25C	1.36014	1.17434	1.57533	4.05233e-05	0.000253037
PMF1-BGLAP	1.5611	1.26193	1.93121	4.07508e-05	0.000473456
PPIA	1.92517	1.40776	2.63276	4.10683e-05	0.000521081
CLTA	1.79623	1.35771	2.3764	4.10823e-05	2.44201e-05
ALYREF	1.54618	1.25549	1.90418	4.10991e-05	0.000598203
PRPF38A	1.75207	1.34013	2.29064	4.11766e-05	0.0219905
SUB1	1.6241	1.28806	2.04781	4.12867e-05	0.0096155
KMT5A	1.8601	1.38234	2.50299	4.17325e-05	0.00124796
CEP131	1.5366	1.25098	1.88742	4.23538e-05	0.00213098
ZCCHC17	1.86501	1.38375	2.51364	4.26158e-05	0.0153284
BCAT1	1.3927	1.1884	1.63212	4.2666e-05	0.00561664
GSR	1.47948	1.22642	1.78475	4.26881e-05	0.0036419
CKAP2L	1.38589	1.18534	1.62036	4.27624e-05	0.00136302
PACC1	1.64683	1.29679	2.09137	4.28461e-05	0.00756762
RBM28	2.03685	1.44799	2.86517	4.3841e-05	0.00824156
DSCC1	1.52505	1.24543	1.86745	4.43102e-05	0.00457895
FTSJ1	1.7558	1.34008	2.3005	4.43927e-05	0.00117769
FKBP1A	1.69933	1.31745	2.1919	4.44799e-05	3.81616e-05
CENPM	1.29642	1.14451	1.4685	4.45146e-05	0.000694831
TICRR	1.60264	1.27783	2.01002	4.47444e-05	0.000501031
CPSF6	1.73158	1.3301	2.25424	4.51248e-05	0.00269224
EGLN3	1.25246	1.12393	1.39569	4.60786e-05	0.00407619
GIT1	1.59653	1.27471	1.99959	4.63729e-05	0.00610989
CNOT9	1.73346	1.33026	2.25886	4.64702e-05	0.00407281
TRAIP	1.45511	1.21476	1.743	4.65859e-05	0.00257292
NT5DC2	1.28945	1.1409	1.45734	4.6871e-05	0.0238364
BBS7	1.6576	1.2994	2.11453	4.73408e-05	0.00213397
DHX37	1.78078	1.34845	2.35171	4.76224e-05	0.00290914
SAMD1	1.66383	1.30173	2.12666	4.78712e-05	0.00118938
ALDOA	1.33072	1.15936	1.52741	4.85965e-05	0.000208302
TRAPPC3	2.14461	1.48397	3.09935	4.8882e-05	0.000190295
C11orf98	1.93106	1.40503	2.65402	4.99565e-05	0.02505
TRIM28	1.61608	1.28146	2.03806	5.01107e-05	0.00453494
WDR12	1.81346	1.35999	2.41813	5.0298e-05	0.0135739
LAPTM4B	1.30395	1.14692	1.48247	5.03817e-05	7.09917e-05
MMS22L	1.93635	1.40671	2.66541	5.05629e-05	0.00854433
PLBD1	1.25458	1.12403	1.40031	5.22501e-05	0.00402595
CCDC134	1.70567	1.31683	2.20933	5.23528e-05	6.49336e-05
TRNAU1AP	1.78854	1.34932	2.37074	5.26074e-05	0.000853651
SNRPD1	1.61465	1.27996	2.03686	5.28565e-05	8.03388e-05
TROAP	1.30791	1.14828	1.48973	5.30002e-05	0.00879361
SPA17	1.60356	1.27497	2.01684	5.42952e-05	0.000564046
CD58	1.45853	1.21415	1.75209	5.48726e-05	0.000323714
RBL1	1.50539	1.23404	1.83642	5.49175e-05	0.0170956
FHL3	1.49787	1.23079	1.82291	5.52149e-05	0.000175794
CDC7	1.41086	1.19344	1.6679	5.55727e-05	0.00114272
TBX19	1.71255	1.31818	2.22491	5.61042e-05	0.000285027
PTP4A2	1.7874	1.34686	2.37205	5.76247e-05	0.00146706
REEP4	1.4693	1.21798	1.77248	5.81569e-05	0.0111224
B4GALT2	1.69326	1.30973	2.18911	5.84516e-05	0.000145399
ILF2	1.67609	1.30274	2.15644	5.8953e-05	0.000615059
PRKCD	1.45842	1.21312	1.75331	5.91472e-05	0.019224
MPZL1	1.47942	1.22202	1.79104	5.92081e-05	0.00092298
POF1B	1.22518	1.10954	1.35288	5.94853e-05	0.00393152
XRCC2	1.49458	1.22832	1.81856	5.96286e-05	0.00398903
NEK2	1.30214	1.14466	1.48128	5.96336e-05	0.000603039
RFC4	1.44752	1.20815	1.7343	6.0637e-05	0.00857052
YEATS2	1.58329	1.26481	1.98196	6.06718e-05	0.000418073
EIPR1	1.73076	1.32364	2.26311	6.09463e-05	0.0137597
DUSP12	1.70451	1.31313	2.21254	6.15732e-05	0.000343723
GTDC1	1.94321	1.40387	2.68976	6.20051e-05	0.00163729
FANCL	1.73634	1.32525	2.27494	6.25962e-05	0.000271638
TOMM40L	1.6493	1.29084	2.10731	6.2879e-05	0.00396738
ASF1A	1.67925	1.30267	2.16469	6.3116e-05	0.00846413
YIPF1	2.21244	1.49941	3.26456	6.31439e-05	0.00122824
MTARC2	0.742166	0.641296	0.858903	6.31655e-05	0.000132775
IGSF3	1.2628	1.12638	1.41573	6.32577e-05	0.00218902
CYP2C9	0.878275	0.824155	0.93595	6.33938e-05	0.00155845
ITGB3BP	1.66353	1.29633	2.13475	6.34599e-05	0.00270129
ALG3	1.99715	1.42294	2.80308	6.3526e-05	0.00424149
ZBTB17	1.96664	1.41155	2.74002	6.41372e-05	0.00892793
SLC36A1	1.5399	1.24607	1.90303	6.43062e-05	0.00152867
UAP1L1	1.27083	1.12984	1.42942	6.48228e-05	0.0248354
RAC1	1.7115	1.31481	2.22789	6.4884e-05	0.00104311
TKT	1.3442	1.1625	1.55431	6.55244e-05	0.00950206
SRM	1.58242	1.26293	1.98272	6.64149e-05	0.000361333
BICD1	1.69578	1.30815	2.19827	6.64895e-05	0.0029718
PHF5A	1.85434	1.36889	2.51193	6.67527e-05	0.000652178
POLQ	1.58814	1.26514	1.9936	6.68754e-05	0.00394122
PDCD6	1.87456	1.37638	2.55306	6.69729e-05	0.00151216
SMYD5	1.63098	1.28227	2.07451	6.7262e-05	0.000135134
FUCA2	1.63986	1.28571	2.09157	6.76428e-05	0.00252889
POLR2H	1.74662	1.32753	2.29803	6.77983e-05	0.00213401
MRPS23	1.7287	1.32046	2.26314	6.81969e-05	0.00447978
TARDBP	2.55435	1.60987	4.05293	6.84671e-05	0.00403517
SF3B6	2.01436	1.42695	2.8436	6.85835e-05	0.00926941
GTF3C6	1.59754	1.26841	2.01208	6.89513e-05	0.00263326
NUP37	1.70932	1.31268	2.22582	6.90272e-05	0.000393198
DKC1	1.62262	1.27842	2.0595	6.91472e-05	0.032393
FGF9	2.9564	1.7329	5.04374	6.97166e-05	0.00149326
MTCP1	1.53862	1.24416	1.90276	7.01899e-05	0.00720752
KNOP1	1.80103	1.34733	2.4075	7.08964e-05	0.00100256
SNRNP40	1.75109	1.32823	2.30856	7.10167e-05	0.00882152
NCAPH	1.33407	1.1572	1.53797	7.12907e-05	0.00182386
CHRAC1	1.71382	1.3135	2.23614	7.2154e-05	0.0192935
BMS1	1.89425	1.38165	2.59702	7.24768e-05	0.00310461
TXNDC12	2.04357	1.43565	2.9089	7.26822e-05	0.000243256
SLC39A10	1.42224	1.19509	1.69256	7.2689e-05	0.000645734
ZNF286A	2.22698	1.4994	3.3076	7.27984e-05	0.0255496
DDX1	1.94936	1.40173	2.71095	7.28052e-05	0.0052028
CEP19	1.63427	1.28193	2.08347	7.35265e-05	0.00727765
HM13	1.83694	1.35993	2.48125	7.36839e-05	1.84803e-05
PSMD2	1.75557	1.329	2.31906	7.41316e-05	0.00510586
BZW2	1.56399	1.25352	1.95137	7.45448e-05	0.00596261
FOXM1	1.27764	1.13174	1.44234	7.48261e-05	0.00147629
CENPH	1.47105	1.21522	1.78074	7.50383e-05	9.95321e-05
ALDH2	0.708639	0.597557	0.840371	7.52066e-05	0.0409524
POLD1	1.52807	1.23873	1.885	7.53388e-05	0.000853898
MACROH2A1	1.69541	1.3053	2.20211	7.59175e-05	8.47041e-05
MPP2	1.75294	1.32733	2.31503	7.63884e-05	0.0495769
ANXA10	0.836301	0.765314	0.913873	7.8154e-05	0.000604155
TIMM9	2.02737	1.42768	2.87896	7.81856e-05	0.000439686
ZNF691	1.7576	1.32857	2.32518	7.82234e-05	0.0032798
HOXD9	1.27873	1.13186	1.44466	7.82563e-05	0.000376129
ATAD3A	1.61793	1.27423	2.05432	7.84696e-05	0.00315852
TALDO1	1.5641	1.25261	1.95305	7.89057e-05	0.000297525
STK25	1.94164	1.39641	2.69977	7.96921e-05	0.00782305
FLVCR1	1.47062	1.21416	1.78125	7.99111e-05	0.0240585
MCM8	1.45476	1.20747	1.75269	8.03729e-05	0.000150677
NIFK	1.79802	1.3432	2.40685	8.04871e-05	0.0221364
YTHDF1	2.03972	1.43112	2.90714	8.06005e-05	0.000960366
NUDC	1.74459	1.32275	2.30094	8.12895e-05	0.0216494
PSMD9	1.93389	1.39304	2.68473	8.13211e-05	0.000436635
RAB42	1.3708	1.17176	1.60365	8.14366e-05	0.000475037
CEP41	1.94636	1.3974	2.71098	8.17472e-05	0.00224876
CFHR3	0.861405	0.799765	0.927795	8.20459e-05	0.000295321
IARS1	1.53291	1.23927	1.89612	8.24151e-05	0.00773846
WASF1	1.40611	1.18665	1.66617	8.26804e-05	0.00396974
YTHDF2	2.0817	1.44492	2.99913	8.2997e-05	0.00409405
MAPKAPK5	2.00094	1.41578	2.82798	8.50296e-05	3.5638e-05
HNRNPM	1.86543	1.36681	2.54595	8.5243e-05	0.00108094
IL15RA	1.40691	1.18651	1.66824	8.59127e-05	0.000830594
MED22	1.62776	1.27641	2.07583	8.59612e-05	0.00193665
CCDC163	1.50826	1.22847	1.85178	8.65754e-05	0.000466587
SRSF2	1.82449	1.35121	2.46355	8.69071e-05	0.00176205
AGTRAP	1.48619	1.21931	1.81148	8.72961e-05	5.47924e-06
LCLAT1	1.67749	1.2954	2.17227	8.76169e-05	0.0152408
CDC6	1.30487	1.14234	1.49053	8.82867e-05	0.00329318
TPGS2	1.49587	1.22292	1.82974	8.93716e-05	0.0055871
ARPC4	1.6858	1.2982	2.18913	8.93728e-05	0.00208112
B3GNTL1	1.54086	1.24107	1.91305	8.98693e-05	0.00363998
PHF19	1.42831	1.19491	1.70731	9.0021e-05	0.0151998
CNOT11	1.59555	1.2628	2.01597	9.02803e-05	0.00122916
CACYBP	1.60097	1.26487	2.02636	9.06227e-05	0.0413475
ISY1	1.77304	1.33098	2.36192	9.07802e-05	0.0103624
GAPDH	1.53909	1.23983	1.91057	9.27954e-05	0.00014409
CTSA	1.64354	1.28101	2.10866	9.31655e-05	0.0395489
PYGO2	1.59299	1.26104	2.01232	9.40968e-05	0.00832871
TMEM201	1.55766	1.24696	1.94577	9.44631e-05	0.0237713
RBM14	1.94792	1.39379	2.72234	9.45792e-05	0.00224442
DDX55	1.75727	1.32402	2.33229	9.49187e-05	0.00112237
ELOVL3	1.39926	1.18205	1.65639	9.49438e-05	0.00121275
SLC38A1	1.23811	1.11219	1.37828	9.50252e-05	0.00232939
CNOT6	1.57173	1.25243	1.97242	9.5146e-05	0.0010067
C20orf27	1.56884	1.25121	1.96711	9.55624e-05	0.000751968
NUP205	1.54884	1.24324	1.92957	9.55814e-05	0.00301186
NDRG1	1.29618	1.13776	1.47666	9.60637e-05	0.0107207
PARD3	1.59188	1.26016	2.01093	9.63928e-05	0.00961146
BRD9	1.69772	1.30112	2.2152	9.65738e-05	2.14096e-05
ZBTB40	1.65921	1.28618	2.14043	9.74109e-05	9.76103e-05
C1orf52	1.78896	1.33513	2.39705	9.7799e-05	0.000146782
RHEBL1	1.62587	1.27301	2.07655	9.87466e-05	0.020135
BDH1	0.790638	0.702458	0.889888	9.88094e-05	0.00247401
MAST2	1.55464	1.24496	1.94134	9.89276e-05	0.0142809
RAD51C	1.67729	1.2927	2.17631	9.94279e-05	0.0288633
GTF3C2	1.6579	1.28517	2.13873	9.98642e-05	0.000768313
TMEM164	1.44549	1.20054	1.74043	0.000100566	0.0030876
EFNA3	1.35301	1.16175	1.57576	0.000101028	0.0128775
FAM83D	1.3292	1.15153	1.5343	0.000101443	0.0157019
XXbac-BPG32J3-22	18.5708	4.25373	81.0762	0.000102182	0.027616
DDX27	1.78594	1.33262	2.39346	0.000103558	0.042686
GRK6	1.80741	1.34023	2.43744	0.000104782	0.000514197
EIF1B	2.02629	1.41815	2.89521	0.000104989	0.00265035
ILKAP	1.97419	1.39996	2.78394	0.0001051	0.00047052
PARPBP	1.43733	1.19639	1.72678	0.000106422	0.00732495
TXLNA	1.74405	1.31637	2.31068	0.000106629	0.00148586
ABCB6	1.55918	1.24543	1.95197	0.0001068	0.000267123
SPP2	0.888331	0.836672	0.943178	0.000107175	0.000222325
PRELID1	1.94331	1.38818	2.72043	0.000108399	0.000331338
MTHFD1L	1.47774	1.21261	1.80084	0.000108537	0.0155251
TMEM17	1.8624	1.35891	2.55244	0.000110165	0.00146864
DEPDC1B	1.27375	1.12671	1.43998	0.000110518	0.0060265
MAN1B1	1.81191	1.34052	2.44906	0.000110567	0.00174714
ETF1	1.93267	1.38366	2.69951	0.000111286	0.0179933
SASS6	1.52628	1.23156	1.89153	0.000112157	0.00904198
CDC42EP2	1.46155	1.20554	1.77191	0.000112191	6.57939e-05
SQSTM1	1.3707	1.16797	1.60862	0.000112788	0.0288154
RECQL4	1.32286	1.1476	1.52489	0.000114037	0.00755732
NRAS	1.5677	1.24754	1.97002	0.000114501	0.00671797
INTS13	1.64689	1.27812	2.12205	0.000114649	0.0333991
PNO1	1.83105	1.34636	2.49023	0.000115405	0.0131641
ZNF544	1.68795	1.2933	2.20303	0.000116786	0.0333226
DAB2	1.30495	1.13969	1.49418	0.000116883	0.00345032
NDUFAF2	1.71056	1.30171	2.24783	0.000117137	0.00093534
NCAPD2	1.39239	1.17652	1.64787	0.000117528	0.0371569
LRRC41	1.75534	1.31817	2.3375	0.000117964	0.00053286
NAA40	1.52174	1.22881	1.88449	0.000118688	0.000980356
SMARCD1	1.60892	1.26286	2.0498	0.000118732	9.85751e-05
RRP9	1.72537	1.30674	2.2781	0.000119658	0.0287422
PRAF2	1.47701	1.21082	1.8017	0.000119665	0.00561548
CENPW	1.32212	1.14675	1.52432	0.000120135	0.00558825
FAM161A	1.65832	1.28149	2.14594	0.000120173	0.0101327
VPS26A	1.80725	1.3365	2.44379	0.000121041	0.00150581
IER3IP1	1.92156	1.37718	2.68113	0.00012151	0.000231386
TAF1B	1.66537	1.28354	2.16078	0.000123699	0.00222417
AGFG1	1.6122	1.26324	2.05756	0.000124219	0.000251031
STX3	1.38572	1.17297	1.63706	0.000125086	0.00485875
KRT17	1.22131	1.10268	1.35269	0.000125609	0.00540682
ZNF131	1.74581	1.31309	2.32113	0.000125955	0.0222682
NUP62	1.57563	1.24882	1.98797	0.000126364	0.0224032
EFNA4	1.4445	1.19687	1.74338	0.000126652	0.000926237
HSPD1	1.72213	1.30412	2.27411	0.000127208	0.0143339
POLA2	1.54848	1.23808	1.93671	0.00012765	0.00247605
MAPT	1.42033	1.18687	1.69972	0.000128184	0.00115831
CDK16	1.48045	1.21114	1.80965	0.000128232	0.000223088
POLR3C	1.63183	1.27006	2.09664	0.000128447	0.012956
GRM4	3.6396	1.87801	7.05359	0.000129839	0.031195
VRK2	1.5401	1.23439	1.92152	0.000130663	0.00362148
BRSK1	1.54756	1.23724	1.93573	0.000131142	0.00108202
RTKN2	1.64356	1.27402	2.12029	0.000131492	0.0162122
BCORL1	1.43871	1.19394	1.73365	0.000131835	0.00667602
LMNB1	1.31149	1.14124	1.50715	0.000132326	0.00861195
TBC1D30	1.42375	1.18768	1.70675	0.000133779	0.00178585
CAP1	1.70901	1.29806	2.25008	0.000134056	0.000866902
TEDC2	1.34253	1.15415	1.56165	0.000134254	9.71424e-05
ACOT12	0.839673	0.767639	0.918466	0.000134271	0.00868322
DLGAP4	1.59515	1.25511	2.02732	0.000134801	0.000186834
PGAM5	1.82445	1.33974	2.48452	0.000135458	0.00167839
TMEM126A	2.1654	1.45607	3.22029	0.000135862	0.000640605
TCEANC2	1.94619	1.38213	2.74045	0.000137146	0.00282397
PDCL3	1.68328	1.28799	2.19988	0.000137192	0.00288899
NRDC	1.89665	1.36481	2.63573	0.00013763	0.00996085
PKIB	1.22464	1.10347	1.3591	0.000137646	0.00462142
MYLK2	1.75718	1.31507	2.34792	0.000137718	0.00033727
CENPF	1.28882	1.13119	1.46842	0.000137927	0.00538208
USB1	1.77123	1.32013	2.37648	0.000137971	0.00313022
GNA14	0.64858	0.519099	0.810359	0.000138589	0.000496211
TSEN34	1.88779	1.36132	2.61786	0.000139505	0.0124551
ACTR5	1.71373	1.29876	2.26131	0.000140199	0.00508668
SCAMP3	1.60345	1.25749	2.04458	0.000140268	0.0227488
ZNF346	1.98707	1.3954	2.82962	0.000140454	0.00858466
PIP4P2	1.3246	1.14611	1.53089	0.000140815	0.0216172
DR1	1.60302	1.25721	2.04395	0.000141101	3.90452e-05
LRRC42	1.53843	1.23225	1.9207	0.000142162	0.000129443
LYAR	1.6604	1.27865	2.15612	0.000142359	0.0156452
B4GALT3	1.68947	1.28928	2.21388	0.000143458	0.000358504
LDHD	0.781369	0.688028	0.887373	0.000144184	0.0376485
IKBIP	1.49188	1.21364	1.83392	0.000145601	0.00358207
DNAJC8	1.80298	1.33011	2.44394	0.000145817	0.00113088
TFAP4	1.79481	1.32706	2.42743	0.000146581	0.0298186
SLC25A19	1.55915	1.23967	1.96097	0.000146801	0.00113941
GSDME	1.36214	1.16125	1.59778	0.000146841	0.000825841
MED6	1.98168	1.3921	2.82097	0.000147032	0.00114908
NHP2	1.75215	1.31161	2.34065	0.000147129	0.00587859
EIF1AD	2.14458	1.44617	3.18029	0.000147633	0.000608208
IFT172	1.55469	1.23782	1.95269	0.000147923	0.00278364
GPD2	1.47235	1.2056	1.79812	0.000148613	0.00184801
WDR62	1.41202	1.18144	1.68759	0.000148827	0.000399439
SYS1	1.93949	1.37712	2.73151	0.000149748	0.0356531
TRPC4AP	1.99436	1.39577	2.84966	0.000149882	0.00678488
MAPK7	1.60191	1.25557	2.04379	0.000150038	5.96598e-05
NUDCD1	1.56803	1.24262	1.97864	0.000150393	0.0019227
CUL2	1.73882	1.30616	2.31478	0.000150847	0.023529
PPARGC1A	0.807949	0.723569	0.902168	0.000151037	0.000119125
PARS2	1.74175	1.30711	2.32092	0.000151586	0.0125263
XPR1	1.48479	1.21019	1.82171	0.000151616	0.0130851
MSH2	1.50406	1.21765	1.85784	0.000152476	0.00242191
IPO13	1.74124	1.30673	2.32024	0.000152787	4.82763e-06
UBE2T	1.33989	1.15153	1.55906	0.000153479	0.0024378
RTL8A	1.34949	1.15547	1.57609	0.00015396	9.8039e-05
FOXK1	1.5127	1.22069	1.87456	0.000155371	0.00142301
ESCO2	1.54608	1.23351	1.93784	0.000156079	0.00342024
SNRPB2	1.81743	1.3334	2.47717	0.000156233	0.00305739
NASP	1.51449	1.22127	1.87811	0.000156426	0.0384766
GYG1	1.61049	1.25795	2.06184	0.000156506	0.0010158
UBE2D2	2.00987	1.39955	2.88632	0.000156578	0.00506576
NRBP1	1.76332	1.31392	2.36642	0.000157518	0.00776033
CEP85	1.49041	1.21174	1.83318	0.00015782	0.00399606
CCDC86	1.59394	1.2515	2.03007	0.000158108	0.0272651
TRMU	1.63498	1.26683	2.11013	0.000158703	0.00194706
FUBP1	1.51413	1.2208	1.87794	0.000159484	0.00145545
RCC1	1.53756	1.22984	1.92226	0.000159513	0.00511915
RNF24	1.46161	1.20024	1.77991	0.000159583	0.00139643
NSUN4	1.83138	1.33773	2.5072	0.000159598	0.00581683
ACAT1	0.713353	0.59861	0.85009	0.000159908	0.0107579
CARS2	1.70452	1.29229	2.24824	0.00015991	0.00127449
XPO5	1.59374	1.25119	2.03008	0.000159982	0.000881857
APEX2	1.74494	1.30691	2.32979	0.000160073	0.000294972
CC2D1B	1.78112	1.31984	2.40362	0.000160241	0.00267954
SERBP1	1.89314	1.35888	2.63745	0.000161503	0.0255149
C14orf119	1.8981	1.36048	2.64816	0.000162084	0.0080973
TMEM185B	1.53073	1.2269	1.9098	0.000162296	3.38402e-05
FEN1	1.39689	1.17408	1.66199	0.000163151	0.0394431
DCTN2	1.70757	1.29289	2.25524	0.000163363	0.00487334
PPIL1	1.62147	1.26113	2.08477	0.000163721	5.03983e-05
ZC3HAV1	1.80848	1.32893	2.46106	0.000163918	0.0203119
POLA1	1.50472	1.21666	1.861	0.000164113	0.0115481
TRMT10C	1.96868	1.384	2.80035	0.000164873	0.00362158
HAUS1	1.54098	1.23055	1.92973	0.000164903	0.0248581
SLC11A1	1.36826	1.1623	1.6107	0.00016522	0.00120245
RNFT2	1.50367	1.216	1.8594	0.000166514	0.00813705
SLC25A39	1.7354	1.30248	2.31223	0.000166637	9.8349e-05
TXNDC9	1.79086	1.32202	2.42597	0.00016819	0.0159094
PHC2	1.63338	1.26496	2.1091	0.000168401	0.000786311
TOP2A	1.22889	1.10377	1.36819	0.000168473	0.0001999
LYPLA2	1.8698	1.34943	2.59082	0.000169296	0.00459436
SLC38A6	1.53449	1.22753	1.9182	0.00016975	0.0380294
ZNHIT6	1.69567	1.28763	2.23302	0.000169951	0.011797
CHAF1B	1.32485	1.1441	1.53415	0.000170704	0.00112106
CSNK1D	1.74255	1.30443	2.32782	0.000170755	0.000322662
NAT9	1.61624	1.25816	2.07623	0.000171843	0.000292184
STARD5	0.634374	0.500289	0.804397	0.000172253	0.000337961
UROD	1.79112	1.32123	2.42812	0.000173843	0.00268613
IK	2.00091	1.39297	2.87416	0.000174262	0.00155147
NLE1	1.56463	1.23851	1.97663	0.000174311	0.000456791
NUP93	1.63874	1.26598	2.12128	0.000176125	0.0124086
WDR55	1.94135	1.37264	2.7457	0.000176288	0.0102593
PTPMT1	1.84415	1.33928	2.53934	0.000176917	0.0119272
RPF1	1.82135	1.33125	2.49188	0.000177586	0.044173
GDPD1	1.47002	1.20166	1.79833	0.000179598	0.00718006
CKAP5	1.56844	1.23924	1.9851	0.000180777	0.000879014
RNF19B	1.4803	1.20554	1.81768	0.000180881	0.0138328
C5orf34	1.53578	1.22681	1.92255	0.000181357	0.00149779
USP39	1.79032	1.31964	2.42888	0.000182495	0.000753122
AP4M1	1.58617	1.24569	2.01971	0.000182607	4.27532e-05
PLCB3	1.58523	1.24532	2.0179	0.000182719	0.00213294
KATNA1	1.79325	1.32062	2.43502	0.000182784	0.00165508
EXOSC3	1.80868	1.32599	2.46708	0.000183011	0.021726
FBXO30	1.64542	1.26753	2.13597	0.000183485	0.000281672
TTC27	1.84479	1.33835	2.54288	0.00018417	0.0165609
PSMD13	1.92147	1.36454	2.70571	0.000184189	0.00054871
PFDN4	1.57518	1.24128	1.9989	0.00018534	0.000633094
AGBL5	1.52776	1.22327	1.90805	0.000186288	0.00169477
LRP10	1.48931	1.20849	1.83539	0.000186689	0.0262616
MAP4K2	1.66956	1.2759	2.18468	0.000187073	0.00890988
COA8	1.68841	1.2827	2.22246	0.000187353	0.00090224
TOMM5	1.75734	1.30727	2.36236	0.000187754	0.0497866
SLC35G2	1.42758	1.1841	1.72113	0.000190679	0.0029468
RAB10	1.5267	1.2224	1.90675	0.000191007	0.000291937
TIPIN	1.62295	1.25831	2.09326	0.000191784	0.00879938
ZMYM4	1.55835	1.2341	1.9678	0.00019363	0.0156119
TM2D1	1.74667	1.30265	2.34205	0.000193992	0.000194084
NOC2L	1.72287	1.29386	2.29413	0.000196656	0.0229928
TTLL1	1.55468	1.23242	1.96122	0.000196708	7.23337e-05
HPX	0.87194	0.811251	0.937168	0.000196905	0.000763276
PRELID3B	1.62168	1.25723	2.09178	0.000197224	0.0294265
AKR1B15	1.1921	1.08674	1.30768	0.00019775	0.00329972
UHRF1	1.29165	1.12867	1.47818	0.000200259	0.0135041
EMG1	1.69124	1.2821	2.23095	0.000200407	0.00327789
LARS1	1.71957	1.29221	2.28827	0.000200417	0.00149727
YWHAZ	1.4517	1.19271	1.76693	0.000201109	0.0190684
VPS45	1.72285	1.29326	2.29515	0.000201376	0.0044185
TRMT61A	1.74308	1.30033	2.33657	0.000202013	0.00129082
ZMYND19	1.72106	1.29247	2.29178	0.000202615	0.015768
DHRS13	1.41449	1.17796	1.69852	0.000203814	0.00260392
TPRA1	2.26395	1.47077	3.48487	0.000204811	0.0045337
SNAPC2	1.80533	1.32167	2.46598	0.000204946	0.0414637
BARD1	1.46058	1.19576	1.78405	0.000205987	0.0236612
TPI1	1.64951	1.26627	2.14874	0.000207269	0.000256364
GCN1	1.71379	1.28904	2.27849	0.000209525	0.00606235
KCTD6	1.4814	1.20343	1.82356	0.000210158	0.00530437
ZIC2	1.24745	1.10979	1.40218	0.000210597	0.00166742
RPIA	1.64736	1.26512	2.14509	0.000210708	0.000350921
EIF2S1	1.95228	1.37029	2.78145	0.000212012	0.000148501
PPME1	1.75024	1.30158	2.35355	0.000212027	0.0262344
LMO4	1.47272	1.19987	1.80763	0.000213185	0.0283308
IPO4	1.73087	1.29463	2.31411	0.000213228	6.10075e-05
UTP6	1.79711	1.31765	2.45105	0.00021381	0.00613984
AAMP	1.9483	1.36853	2.7737	0.000214909	0.000248197
ZC3HC1	2.10224	1.41836	3.11585	0.000214925	0.00526394
HSPA4	1.88669	1.34789	2.64086	0.000215613	0.000568012
XRCC5	1.77104	1.30838	2.39731	0.000215702	0.00439945
NUP107	1.57789	1.23915	2.00922	0.000216406	0.00233768
C4orf47	1.61837	1.25382	2.08893	0.000218216	0.000276729
DLAT	1.49349	1.20726	1.84758	0.000219774	0.00236142
RGS20	1.9167	1.35728	2.7067	0.000220037	0.00218835
PABPC4	1.64969	1.26492	2.1515	0.000220463	0.0352058
HASPIN	1.55875	1.23169	1.97265	0.000220478	0.00963007
ASB3	2.72676	1.60094	4.64429	0.000222501	0.0121738
FANCD2	1.40027	1.17101	1.67443	0.000223895	0.0116054
KIF2A	1.48024	1.2019	1.82303	0.000223923	0.00297421
KIF14	1.38484	1.16488	1.64632	0.000224742	0.00871117
SPDYA	2.43797	1.51843	3.91437	0.000225244	0.0292253
FOCAD	1.64677	1.26329	2.14665	0.00022606	0.0126306
PLXNA1	1.34735	1.14989	1.57872	0.000226639	0.0113321
UBXN2A	1.753	1.30076	2.36247	0.000226751	0.00135339
AMZ2	1.6757	1.27351	2.20489	0.000227274	0.0403831
PHKA2	1.60087	1.24652	2.05594	0.000227595	0.00316672
ANXA5	1.34434	1.14856	1.57351	0.000229007	5.11198e-05
PSMA7	1.74697	1.29807	2.35111	0.000231848	0.00171893
C18orf21	1.87772	1.3424	2.62652	0.00023353	0.00131798
IRAK1	1.44922	1.18931	1.76593	0.000233982	0.00215225
MRPL37	1.82687	1.32521	2.51845	0.00023418	0.00038792
RPUSD3	1.83431	1.32763	2.53437	0.000234948	0.000126046
UIMC1	1.79177	1.31313	2.44487	0.000235167	0.00708535
SLC10A1	0.8964	0.845647	0.950199	0.000235265	0.000625334
EBNA1BP2	1.70095	1.28155	2.25761	0.000235703	0.00348491
SFT2D1	1.54073	1.22359	1.94008	0.000236925	0.00200034
EWSR1	1.8714	1.33957	2.61437	0.00023897	0.000395099
ACP1	1.823	1.32309	2.51179	0.000240671	0.00043358
PCLAF	1.31224	1.13505	1.51709	0.000241047	0.000268836
SNX5	1.78803	1.31114	2.43837	0.000241102	0.0195947
DRG1	1.81258	1.3193	2.4903	0.000242805	0.0458146
ARMC9	1.55064	1.22671	1.9601	0.000243456	0.0163864
NDRG3	1.43211	1.18199	1.73516	0.000245254	0.0114806
GLMP	1.4964	1.20634	1.85621	0.000246116	0.000255534
HSF2	1.54653	1.22496	1.95252	0.000246378	0.000475633
RTCA	1.73067	1.29073	2.32058	0.000247023	0.0157908
ADAM9	1.28803	1.12492	1.4748	0.000248507	0.00275323
SFR1	1.58158	1.23757	2.02121	0.000249077	0.000717204
YKT6	1.54466	1.22405	1.94925	0.000249103	0.000749904
UBAP2	1.55816	1.22896	1.97554	0.000249762	0.00975138
LHX4	1.87026	1.33779	2.61467	0.000249978	0.00549678
RNASEH2A	1.37799	1.16064	1.63604	0.00025126	0.0148556
C12orf43	2.14981	1.4268	3.23917	0.000252868	0.00427864
NCAPG2	1.39505	1.16707	1.66755	0.000255078	0.00257816
GMPPA	1.91088	1.35038	2.70403	0.000256425	0.00406241
STX1A	1.45233	1.18878	1.77431	0.000259592	0.000144335
RBBP4	1.54148	1.22201	1.94448	0.000260271	0.00747779
PKNOX1	1.99767	1.37784	2.89635	0.000261135	0.0164552
RNF25	1.95238	1.36324	2.79611	0.000261391	0.000281061
TIMMDC1	1.93128	1.35638	2.74987	0.000261589	0.0217767
NAE1	1.81163	1.31676	2.49247	0.000261831	0.00219977
FCGBP	1.22976	1.10051	1.3742	0.000261995	0.0242589
NCDN	1.40947	1.17221	1.69476	0.000262753	0.000119381
RPUSD4	1.77822	1.30527	2.42255	0.000263614	0.0110365
STARD3NL	1.50638	1.20878	1.87724	0.000263782	0.000385194
TBL1XR1	1.62676	1.25255	2.11277	0.000263974	0.00357457
CHD1L	1.51312	1.21117	1.89036	0.000265416	0.00469188
FAM118B	1.785	1.30716	2.43752	0.000267418	0.0119977
DUSP18	1.7792	1.30514	2.42544	0.000267883	0.0154479
TMCO3	1.34098	1.14518	1.57027	0.00026925	6.06896e-05
MFSD5	1.60668	1.24483	2.07371	0.000270406	0.00134489
FAM50A	1.43934	1.18313	1.75102	0.000271076	0.00189079
RHNO1	1.46376	1.19232	1.79699	0.000271766	0.00023262
LECT2	0.889638	0.835327	0.947481	0.000274183	0.0036646
ATG7	2.13623	1.4192	3.21553	0.000274945	0.0157168
S100A10	1.33039	1.14071	1.55161	0.00027535	0.000710227
TMEM120B	1.84908	1.32742	2.57572	0.000278113	0.00400936
MYCBP	1.58026	1.23466	2.02261	0.00027907	0.000132918
GPN2	1.85088	1.32789	2.57984	0.000279275	0.0108685
METTL23	1.72228	1.28445	2.30936	0.000280476	0.0198192
CDCA7L	1.32665	1.13899	1.54522	0.00028079	0.00591862
QRFP	2.61734	1.55732	4.39889	0.00028105	0.034241
METTL2A	1.77776	1.30313	2.42527	0.000282516	0.00144679
SNRPB	1.50451	1.20674	1.87574	0.000283342	0.00501256
YRDC	1.82555	1.31886	2.52692	0.00028514	0.000511703
MYB	1.76465	1.29819	2.39871	0.000287692	0.0254245
PPP1CB	1.6259	1.25024	2.11445	0.000287825	0.00244242
HDAC11	1.42551	1.1768	1.72678	0.000289915	0.000107879
ASPM	1.29022	1.12412	1.48087	0.000290268	0.000442252
ARL8B	1.75324	1.29402	2.37542	0.000290807	0.0280752
COMMD9	1.53089	1.21591	1.92747	0.000290916	0.00332056
C4orf46	1.51361	1.20959	1.89405	0.000290931	0.00559427
RAD51	1.36788	1.15465	1.62048	0.000291097	0.0129122
SSBP1	1.94881	1.35835	2.79593	0.000291184	0.018557
TSEN54	1.5134	1.20947	1.8937	0.000291464	0.00245426
C3orf52	1.43279	1.17936	1.74067	0.000293359	0.00438425
TAGLN2	1.45216	1.18659	1.77717	0.000294343	0.00673316
DDX11	1.39062	1.16324	1.66245	0.000294757	0.0153816
RABIF	1.67589	1.26712	2.21652	0.000295115	0.00308333
CKAP2	1.37907	1.15876	1.64128	0.000295606	0.0249505
EIF3D	1.62124	1.2479	2.10627	0.000296399	0.00349015
CGNL1	0.782919	0.685693	0.893931	0.000297683	0.00497911
FAM189B	1.47847	1.19611	1.82748	0.000299156	0.000845481
NPC1	1.48482	1.19835	1.83977	0.000300908	0.0028184
HSPA8	1.5346	1.21657	1.93577	0.000301062	0.00334164
PIGS	1.40142	1.16701	1.68292	0.000301867	0.00103615
POGK	1.44279	1.18262	1.76019	0.000302319	0.0074688
PPFIA4	1.63101	1.25083	2.12674	0.00030288	0.00208582
COPS7B	1.68906	1.271	2.24463	0.000302974	9.93347e-05
ARPC2	1.68163	1.26821	2.22982	0.000305628	0.000226271
STAM	1.56101	1.22574	1.98798	0.000306277	0.0245546
HARBI1	1.99897	1.3724	2.91159	0.000306416	0.00696666
EIF2B3	1.89644	1.33977	2.6844	0.000306465	0.028476
GRB2	1.74189	1.28859	2.35465	0.0003078	0.0011853
DNAJC5	1.55973	1.22516	1.98566	0.000307988	0.00189488
EME1	1.38134	1.15896	1.64638	0.000309444	0.000897677
METTL1	1.56645	1.22744	1.99908	0.000309842	0.00193353
RAB3IL1	1.28725	1.1222	1.47658	0.00031002	0.0258702
SRGAP2	1.52425	1.2121	1.9168	0.000311926	0.0172778
PKM	1.19189	1.0834	1.31124	0.000312186	0.000132709
PRIM1	1.38194	1.15884	1.64799	0.000317042	0.00273473
PUS1	1.67425	1.26462	2.21656	0.00031835	0.0264664
TAF12	1.68388	1.26745	2.23714	0.000324365	0.00305002
MASTL	1.46061	1.18797	1.79583	0.000325781	0.00490089
TRIM59	1.55871	1.22353	1.98571	0.000326752	0.00984952
NOL11	1.7104	1.27606	2.29257	0.000329492	0.0330196
RCC2	1.39335	1.16256	1.66995	0.000330421	0.0156568
SLC25A24	1.29407	1.12418	1.48963	0.000330453	0.0104866
PHLDA2	1.20565	1.08862	1.33525	0.000330783	0.00118571
POLR3F	1.83343	1.31679	2.55275	0.0003312	0.00688815
TOMM22	1.6609	1.259	2.1911	0.000331508	0.0065275
MPV17	1.39344	1.16234	1.67049	0.000335928	5.91508e-06
G6PC1	0.882704	0.824451	0.945072	0.000341225	0.000589116
RAD51AP1	1.31189	1.13076	1.52204	0.000342226	0.000465256
HSPB11	1.66817	1.26032	2.208	0.000346967	0.0156824
GMEB1	1.81767	1.31004	2.52199	0.000348634	0.00399226
TAF9	1.6159	1.24218	2.10204	0.000348822	0.0352941
CLEC2L	1.26592	1.1124	1.44062	0.000350485	0.000380494
YWHAQ	1.47346	1.19122	1.82257	0.000353115	0.00663537
THOC7	1.84537	1.31844	2.5829	0.000355012	0.0442454
SLC2A2	0.876617	0.815467	0.942351	0.000357783	0.000497638
DIAPH3	1.35513	1.14684	1.60125	0.000358331	0.00448195
CHTOP	1.73582	1.28221	2.3499	0.000358994	0.00396255
EMC1	1.58835	1.23191	2.04793	0.000359014	0.00114552
DYNLT1	1.6792	1.26308	2.23241	0.000360484	0.0146828
AFM	0.879041	0.818929	0.943565	0.00036068	0.000497143
TMEM79	1.70884	1.27306	2.29378	0.00036069	0.000279786
CCDC88A	1.43747	1.17763	1.75465	0.000360748	0.00647279
ESPL1	1.33437	1.13878	1.56354	0.000361014	0.0057334
GLRX3	1.79907	1.30282	2.48433	0.000361825	0.0348402
UBE2J2	1.75121	1.28707	2.38274	0.000362191	0.00658985
GPN1	1.7363	1.28201	2.35157	0.000363527	0.00186653
PPP1CC	1.64326	1.25028	2.15975	0.000368324	0.0160093
ARHGEF39	1.46273	1.1865	1.80326	0.000368888	0.00403252
PLK4	1.41897	1.17031	1.72045	0.000370927	0.000484429
CRIPT	1.88635	1.33001	2.6754	0.000371581	0.00508576
MAD2L2	1.51584	1.20548	1.90611	0.000372605	0.048882
RDM1	1.44352	1.17917	1.76712	0.000375145	0.000365813
RUVBL2	1.7763	1.29415	2.43809	0.000376764	0.00194248
EIF4A3	1.62975	1.24495	2.13349	0.00037889	0.00268375
ZBED8	1.53475	1.21184	1.94369	0.000379121	0.0188879
TOMM34	1.60252	1.23546	2.07863	0.000380813	0.000163749
POMGNT1	1.72563	1.27713	2.33163	0.000380975	0.00239331
POLR3A	1.77879	1.29455	2.44418	0.000381944	0.000326211
CCDC112	1.43861	1.17701	1.75836	0.000383075	0.00184268
RIBC2	1.30796	1.1278	1.51691	0.000384644	0.0346157
SCIN	1.57224	1.22465	2.0185	0.000385727	0.002215
AGPS	1.5738	1.22499	2.02193	0.000389096	0.000755654
FBXO45	1.69696	1.26659	2.27356	0.000394851	0.00520029
RNF227	1.49262	1.19597	1.86286	0.000395705	0.00245469
FRMD1	1.46513	1.18608	1.80984	0.000395718	0.00285837
SLC22A1	0.900918	0.850388	0.954451	0.000395751	0.000455929
BLOC1S4	1.63455	1.24547	2.14516	0.000396174	0.0086759
CDV3	1.69317	1.26523	2.26584	0.00039624	0.00120095
GABRA3	1.34932	1.14319	1.59263	0.000396968	0.00196564
LARP4B	1.5762	1.22522	2.02773	0.000399571	0.004464
SLC16A11	0.838336	0.760365	0.924303	0.000399588	0.00803372
ZNF248	1.67542	1.25902	2.22956	0.000400319	0.00335238
ANP32E	1.48581	1.1932	1.85018	0.000402394	0.0199632
MRPL3	1.72938	1.27644	2.34304	0.000407433	0.00396492
MCM7	1.34752	1.14211	1.58988	0.000408418	0.000171273
FKBP1C	2.21681	1.42556	3.44722	0.000409323	0.000852057
ACOT7	1.47185	1.1878	1.82383	0.000410666	0.00048302
VPS35	1.56298	1.21994	2.00247	0.000411709	0.042779
TMEM81	1.66402	1.25439	2.20742	0.000412553	0.012597
ZFP64	1.70546	1.26813	2.29362	0.000413526	0.0123316
DAZAP1	1.89181	1.32799	2.695	0.000413803	0.0196068
PSMA5	1.79786	1.29822	2.48979	0.000413976	0.00261343
TCP1	1.61236	1.2368	2.10198	0.00041436	0.00828283
XRCC3	1.54851	1.21463	1.97417	0.000416892	0.000220991
ARPC1A	1.73168	1.27639	2.34936	0.000418846	0.00328409
CCDC97	1.58219	1.22612	2.04167	0.000420124	0.00387885
CLEC5A	1.48372	1.19161	1.84745	0.000420208	0.00338988
DCLRE1B	1.54542	1.21317	1.96866	0.000424018	0.0147167
POP7	1.59595	1.23051	2.06992	0.000426009	0.0284751
PPFIA3	1.52616	1.20634	1.93078	0.000426093	0.0139042
RIC8A	1.79862	1.2971	2.49405	0.000432065	0.000478618
STIL	1.3983	1.16	1.68556	0.000436606	0.00905338
TMEM267	1.42602	1.17005	1.73799	0.000438552	0.0041286
RPN1	2.02929	1.36767	3.01097	0.000439331	0.00981161
STK32C	1.46616	1.18447	1.81483	0.000439413	0.00251747
ECE2	1.62729	1.24035	2.13495	0.000440225	0.00720208
ZNF207	1.67094	1.25489	2.22492	0.000441242	0.000504981
SH3D21	1.46075	1.18233	1.80472	0.000444128	0.00399474
RBFA	1.70565	1.26617	2.29768	0.000444131	0.000350613
GCLM	1.3639	1.14701	1.6218	0.000444523	0.00269098
NT5C	1.42106	1.16796	1.72901	0.00044577	0.00421732
TMEM41B	1.78936	1.29314	2.47599	0.000445858	0.0147311
RRP36	1.7462	1.27918	2.38373	0.000447168	0.00993361
BAG2	1.45106	1.17868	1.78639	0.000448465	0.00264587
TOR4A	1.29288	1.12011	1.49231	0.000448553	0.00111956
PRPF3	1.48519	1.1908	1.85237	0.000449525	0.0154927
SFN	1.13714	1.05836	1.22178	0.00045089	0.000985293
MAP7D1	1.4247	1.16901	1.73632	0.000452678	0.028967
CLIC1	1.3514	1.14205	1.59913	0.000453816	0.00196008
SLC9A3R1	1.49395	1.19369	1.86973	0.000453906	1.06241e-05
RNF186	1.45875	1.1812	1.80152	0.000454004	0.0353332
FOXO3B	2.20875	1.4183	3.43973	0.000454596	0.0278771
SLC35E4	1.48604	1.19064	1.85473	0.000459882	0.0312271
RUSC1	1.42718	1.16959	1.74149	0.000460873	0.011618
SCAMP4	1.57924	1.22291	2.0394	0.000461135	0.00741771
ASB1	1.5965	1.22878	2.07427	0.00046116	0.0381099
UBTD2	1.61812	1.23589	2.11855	0.000464507	0.0231301
PSMD11	1.70126	1.26343	2.29081	0.000464803	0.000817494
PKMYT1	1.32531	1.13194	1.55173	0.000465227	0.00389793
PFKP	1.18314	1.07677	1.30003	0.000467613	0.000133354
A1BG	0.859892	0.790154	0.935786	0.000468884	0.00654065
FANCI	1.329	1.13316	1.5587	0.000470795	0.00131869
TTC1	1.97291	1.34765	2.88825	0.000475387	0.0288175
FAM217B	1.42767	1.16921	1.74326	0.000475653	0.00043295
RDH16	0.882112	0.822171	0.946423	0.000476423	0.00532381
CTSC	1.27134	1.11109	1.45469	0.000478484	0.00339297
ATP6V1F	1.51984	1.20158	1.92239	0.000479887	0.00388264
PRXL2B	1.36813	1.14732	1.63145	0.00048266	0.00333185
THAP2	1.8431	1.30744	2.59823	0.000482892	0.00415792
CANT1	1.57402	1.22	2.03077	0.00048361	0.00959518
BCL10	1.53203	1.20556	1.94692	0.000485024	3.82271e-05
GNAI3	1.70962	1.26488	2.31073	0.000485643	0.00755192
AP1S3	1.52032	1.20145	1.92382	0.000486544	0.00849532
ACTL6A	1.45917	1.17999	1.80441	0.000487719	0.00951915
PDCD2	1.75659	1.27979	2.41103	0.000488884	0.00886489
PRR13	1.69359	1.25942	2.27743	0.00048988	0.00643933
KDELR1	1.71554	1.26616	2.32441	0.000496281	0.0222392
RALA	1.67219	1.25201	2.23339	0.00049739	0.000376124
KHDRBS1	1.72274	1.26829	2.34003	0.000499506	0.00175436
ARHGAP11A	1.32356	1.13029	1.54987	0.000499981	0.00788334
ZNF785	1.68357	1.25558	2.25746	0.000500026	0.016345
ANXA2	1.3216	1.12936	1.54657	0.000507548	0.0240435
CDC42	1.70799	1.26294	2.30986	0.000509607	0.0148628
TBCB	1.47517	1.18476	1.83677	0.000509681	0.000592684
TCF3	1.45473	1.17755	1.79714	0.000510124	0.00330668
RAB13	1.7488	1.27597	2.39685	0.000510389	0.010841
CENPK	1.38614	1.15289	1.66658	0.000513859	0.00071988
RHEB	1.70757	1.26249	2.30956	0.000515113	0.0315088
RAP1GAP	1.22632	1.09293	1.37598	0.000515666	0.00334783
GRIN2D	1.46418	1.18065	1.8158	0.000516113	0.000965564
HINFP	1.90221	1.32314	2.73471	0.000516993	0.00186376
GOLT1B	1.70138	1.26025	2.29694	0.000519568	0.00198594
CHML	1.30499	1.12279	1.51675	0.000521301	0.0256527
CXCL8	1.14179	1.05938	1.2306	0.000521601	0.00539691
COMMD8	1.48688	1.18836	1.8604	0.000522054	0.000580839
C1orf159	1.64905	1.24298	2.18778	0.000524224	0.00317814
MAP3K9	1.5622	1.21398	2.01029	0.000526346	0.00152826
CPS1	0.908853	0.861045	0.959315	0.000527235	0.000492893
VPS37C	1.5909	1.22342	2.06877	0.000530848	0.000131222
NSUN5	1.64827	1.24238	2.18678	0.000531051	0.0451848
RBP4	0.861301	0.791532	0.937219	0.000531519	0.00869309
PSMB5	1.93993	1.33324	2.82269	0.000534101	0.00135675
POMT2	1.64891	1.24242	2.1884	0.000534292	0.000973389
EIF2S3	1.5135	1.197	1.9137	0.000535879	0.0128398
TBC1D32	1.9706	1.34217	2.89328	0.000536565	0.0371655
HECTD3	1.58863	1.22231	2.06473	0.000538258	0.0280566
PRC1	1.26602	1.10771	1.44696	0.000538638	0.000589252
SNX17	1.93537	1.33148	2.81315	0.000539695	0.0176316
NARS1	1.59003	1.22271	2.06769	0.000539697	0.016958
LHFPL2	1.3315	1.13214	1.56596	0.000540597	0.0024567
MARCKS	1.3413	1.13574	1.58406	0.000540976	0.00621061
RNF34	1.57491	1.21741	2.03738	0.000545108	0.0034256
MPP6	1.39097	1.15365	1.6771	0.000545227	0.0337723
ATG3	1.82547	1.2978	2.56768	0.000545238	0.0329895
NDUFAF1	0.560431	0.403609	0.778186	0.000545462	0.0142516
PTRH2	1.63184	1.23618	2.15416	0.00054736	0.0218456
BAMBI	1.20587	1.08441	1.34094	0.00054804	0.000267661
SENP3-EIF4A1	14.6005	3.191	66.8049	0.000549385	0.0354921
F11	0.824517	0.739035	0.919885	0.000549644	0.0220033
N4BP3	1.49987	1.19174	1.88767	0.00055033	0.000198095
SNX7	1.28074	1.11293	1.47386	0.000554196	0.000141677
SARS1	1.67579	1.2501	2.24644	0.000554686	0.0198016
ATG9A	1.82389	1.29656	2.5657	0.000557286	0.000661894
HAGH	0.724306	0.603087	0.869891	0.000557294	0.0053895
CDKN2D	1.45627	1.17625	1.80297	0.00056096	0.00296249
CAMSAP2	1.38575	1.15126	1.66799	0.000562184	0.000578747
KCTD17	1.22562	1.09179	1.37585	0.000563781	0.0419595
PUSL1	1.47195	1.18151	1.83378	0.00056608	0.00310049
PRCC	1.61242	1.2289	2.11562	0.000566104	0.0122589
CYRIB	1.39933	1.15595	1.69396	0.00056794	0.0282742
IVD	0.676812	0.542063	0.845059	0.000568574	0.00126787
PPHLN1	1.77516	1.28067	2.46058	0.000571135	0.0019161
MTA2	1.72067	1.2635	2.34327	0.000572626	0.00557761
AACS	1.42588	1.1652	1.74488	0.000572713	0.0462405
PAQR4	1.26249	1.10562	1.44161	0.000574661	0.0105201
PRMT3	1.55098	1.20812	1.99114	0.000574799	0.00193277
EXOSC10	1.70434	1.25817	2.30873	0.000575325	0.00161448
NECTIN1	1.36763	1.14432	1.63453	0.000577254	0.0116886
CA9	1.11255	1.04699	1.18222	0.00057766	0.00011342
ARFIP2	1.71658	1.26193	2.33505	0.000577806	0.0297125
POU2F1	1.7098	1.25972	2.32069	0.000578841	0.0206681
ACTR6	1.69557	1.25517	2.2905	0.000579441	0.0286569
FBXO43	1.50431	1.19208	1.89832	0.000581119	0.00887273
TSEN15	1.65037	1.24054	2.19561	0.00058191	0.00698149
DBF4B	1.52587	1.19924	1.94146	0.000585318	0.00396441
PRKRA	1.68158	1.25034	2.26156	0.00058671	0.0105607
SLC22A15	1.2754	1.11023	1.46515	0.000586903	0.00117596
YWHAH	1.50888	1.19341	1.90775	0.000587247	0.00181248
USP1	1.42478	1.16434	1.74349	0.000587769	0.00206297
FEZ2	1.4885	1.18642	1.86748	0.000588033	0.00867206
RABGGTB	1.63423	1.23481	2.16286	0.000592625	0.0050405
MTF2	1.48171	1.18393	1.85438	0.00059269	0.000790198
SRD5A3	1.48062	1.18355	1.85225	0.000592814	5.16349e-06
GLTP	1.67883	1.24894	2.25667	0.0005971	0.0315718
SMIM12	1.84287	1.2998	2.61286	0.000599152	0.00119567
RAP2A	1.35158	1.13789	1.60541	0.000601269	0.00410792
FIBP	1.8135	1.29072	2.54802	0.000601757	0.00595312
SOX11	2.38652	1.45124	3.92456	0.000609373	5.86178e-07
KPNA4	1.6742	1.2468	2.24811	0.000610955	0.0212433
HSP90AA1	1.52755	1.19868	1.94664	0.000614858	0.000327792
MCM5	1.37225	1.14482	1.64487	0.000619785	0.0312995
CORO1C	1.47199	1.1796	1.83685	0.000621822	0.000140723
OGG1	1.62683	1.23108	2.14981	0.000622196	0.000803142
DPY30	1.81691	1.2905	2.55805	0.000623859	0.00340059
ANKZF1	1.67263	1.24569	2.24591	0.000623909	0.0102664
TLCD1	1.35536	1.13862	1.61335	0.000625876	0.00292941
GAN	2.14435	1.38465	3.32088	0.000630156	0.00595341
ABCC1	1.24984	1.0998	1.42035	0.000631245	0.0010165
PTGES3	1.8131	1.28886	2.55057	0.000632525	0.0132885
LAGE3	1.38574	1.14913	1.67107	0.000637569	0.00754211
AGAP3	1.6835	1.24835	2.27034	0.000640777	0.0117337
ERP29	1.79443	1.28271	2.5103	0.000641289	0.000632178
DDX56	1.90894	1.31691	2.76713	0.00064187	0.0219539
YAE1	1.71266	1.2574	2.33274	0.000642927	0.0168517
STK39	1.22515	1.09027	1.37671	0.000644536	0.00013345
GATC	1.93491	1.32434	2.82697	0.000644576	0.0036402
IQCD	1.33202	1.12977	1.57048	0.000644599	0.00531505
ZMYM1	1.52396	1.19629	1.94137	0.000647178	0.00588978
U2AF2	1.68374	1.24794	2.27173	0.000651225	0.0336421
ZNF589	1.6254	1.22924	2.14924	0.000654355	0.00489358
PDCD11	1.58105	1.21482	2.05768	0.000655727	0.0149748
CSPG5	1.40693	1.15606	1.71223	0.000656203	0.011603
PLEKHM2	1.55315	1.20558	2.00093	0.000658098	0.00232097
CSTB	1.48219	1.18187	1.85883	0.000658199	0.000795989
S100A16	1.32891	1.12834	1.56513	0.000658261	0.000544195
B4GALT5	1.35074	1.13611	1.60591	0.000660683	7.46448e-05
ZNF133	1.62391	1.22844	2.1467	0.000662153	0.00346387
DNAAF5	1.54106	1.2014	1.97675	0.000663319	0.00239189
GAR1	1.7308	1.26205	2.37366	0.000663677	0.0228713
RPS8	1.49135	1.18472	1.87734	0.000665738	0.0104756
KCNQ3	1.94941	1.32704	2.86368	0.000669024	0.00393316
DGKG	1.66282	1.24046	2.22898	0.000670874	0.00834536
E2F8	1.29592	1.11609	1.50472	0.000671384	4.69916e-05
SRL	0.20096	0.0796882	0.506787	0.000673579	6.37908e-05
HMGXB3	1.64884	1.23582	2.19989	0.000675729	0.00333409
EPS8L3	1.16758	1.06775	1.27674	0.000680031	0.00715135
CD2BP2	1.63089	1.22985	2.1627	0.000681976	0.00985934
BOP1	1.32787	1.12741	1.56398	0.000683358	0.00180643
TMEM241	1.61442	1.22451	2.12847	0.000683679	0.00717307
ASF1B	1.2528	1.09994	1.42691	0.000687298	0.00416077
ING5	1.74582	1.26539	2.40866	0.000690378	0.0103575
PLEKHA8	1.66965	1.24175	2.245	0.000690856	0.0242359
EIF2B2	1.86502	1.3011	2.67337	0.000692086	0.00307717
AATF	1.6351	1.23075	2.17231	0.00069289	0.0022039
TMEM147	1.40881	1.1556	1.71752	0.000697473	3.17808e-05
ETV4	1.15753	1.06366	1.25968	0.000698529	0.00576938
B3GALNT1	1.35481	1.13656	1.61497	0.000703251	0.00244472
RPAP3	1.7582	1.26836	2.43723	0.000707428	0.00932885
CASP2	1.43966	1.16588	1.77774	0.00070914	0.00745829
MANBAL	1.68454	1.24557	2.27822	0.000710358	0.00146541
SLC1A4	1.36736	1.14077	1.63897	0.000712679	0.00304039
QSER1	1.49755	1.18526	1.89212	0.000713551	0.00386988
FAM219A	1.55418	1.20387	2.00642	0.000714962	0.0105546
RTP3	0.884908	0.824399	0.949858	0.00071575	0.0447385
BSG	1.34398	1.13242	1.59506	0.000717134	0.000169101
PDE2A	0.713053	0.586109	0.867491	0.000722034	0.000189371
GLYATL1	0.859237	0.786887	0.93824	0.000723683	0.0236861
HCCS	1.65982	1.23729	2.22665	0.000723748	0.000308102
G2E3	1.58934	1.21481	2.07934	0.00072702	0.000207304
RPE	1.60736	1.22046	2.1169	0.000730002	0.00931002
CNOT10	1.65881	1.23664	2.22509	0.000731737	0.0287616
MXD3	1.42251	1.15936	1.74538	0.000733242	0.00385042
HARS2	1.71562	1.25418	2.34684	0.000733352	0.00540376
RNF8	1.63776	1.2298	2.18105	0.00073771	8.70448e-05
TRAF3	1.48838	1.1814	1.87512	0.000739533	0.00886483
THEM4	1.5511	1.202	2.00158	0.000740058	0.000467856
KHDC4	1.4195	1.15798	1.74007	0.000746735	0.00322345
C12orf65	1.83588	1.28948	2.61383	0.000750581	0.0264413
CDKL3	3.05677	1.59596	5.85469	0.000752208	0.047427
PSME3	1.5641	1.20574	2.02896	0.000753877	0.0321492
KIF3C	1.29511	1.11423	1.50536	0.000753969	0.00585416
CBX8	1.53307	1.19564	1.96573	0.000755185	0.0272618
EIF3I	1.76508	1.26818	2.45667	0.000756037	0.0212025
CLCF1	1.28604	1.11085	1.48885	0.000759931	0.0366112
PPP1R14B	1.39218	1.14827	1.68789	0.000760429	0.000368835
ZNF816	1.35813	1.13644	1.62306	0.000760946	0.0149
UTP18	1.57381	1.20862	2.04936	0.00076114	0.018747
RPN2	1.70379	1.24927	2.32367	0.000763407	0.00983477
DRAP1	1.76461	1.26763	2.45644	0.000765026	0.030775
PHF21A	1.47483	1.17605	1.84952	0.000768437	0.00722004
NLRP6	0.780339	0.675338	0.901665	0.000768647	0.00119225
BRCA1	1.40035	1.15084	1.70396	0.000770532	0.00904943
KLHL18	1.81462	1.28207	2.56839	0.000774355	0.0262913
PSMD6	2.0793	1.35676	3.18664	0.00077773	0.0297754
UBE2R2	1.90157	1.30711	2.76639	0.000778669	0.041133
DNAJC6	1.30619	1.11772	1.52644	0.000780155	0.00228669
PIF1	1.37654	1.14238	1.6587	0.000781603	0.0346301
RFT1	1.82109	1.28362	2.5836	0.000781808	0.00141918
SNU13	1.70063	1.2474	2.31853	0.000785331	0.0146349
ASRGL1	1.24544	1.09566	1.41569	0.000786571	0.00646477
GPD1L	1.30836	1.11837	1.53063	0.000786609	0.00546937
FABP5	1.2931	1.11291	1.50248	0.000787511	0.000711389
DZIP1L	1.3882	1.14626	1.68121	0.000787799	0.0393383
EIF6	1.68689	1.24301	2.28927	0.000789966	0.0130962
SNRPC	1.59237	1.21353	2.08946	0.000790342	0.00479526
ATAD3B	1.48407	1.17847	1.86892	0.00079116	0.026728
ERI1	1.50544	1.18547	1.91177	0.000792169	0.00207872
TMC7	1.45023	1.16716	1.80196	0.000793422	0.000793852
PAFAH1B3	1.23304	1.09094	1.39366	0.000798756	0.000653118
TRIM16	1.20562	1.08075	1.34492	0.000802623	0.00079141
EMCN	0.727752	0.604335	0.876373	0.000802916	0.00632014
ACAD9	2.11106	1.36353	3.2684	0.000807212	0.0224746
OSBP2	1.35203	1.13332	1.61295	0.000807835	0.0382451
COPS8	1.75436	1.26268	2.43749	0.000808077	0.00120382
RALY	1.51461	1.18786	1.93124	0.000812515	0.046303
GTPBP6	1.62044	1.22155	2.1496	0.000814092	0.0246616
GLA	1.38243	1.14362	1.67111	0.000817157	0.0450715
ACD	1.55389	1.20035	2.01157	0.000818523	0.00684642
CHMP4B	1.57693	1.20768	2.05909	0.000819035	0.00280388
DNTTIP1	1.81673	1.28053	2.57745	0.000821059	0.00547105
CXXC1	1.69201	1.24334	2.30258	0.000821611	0.0142434
AGRN	1.27033	1.10415	1.46153	0.000822832	0.00558264
RRM1	1.44274	1.16385	1.78846	0.000824631	0.0109675
HNRNPLL	1.70392	1.24683	2.32858	0.000824776	0.00014135
BAK1	1.33504	1.12703	1.58144	0.000826479	0.00668465
KPNB1	1.48757	1.17855	1.87761	0.000829597	0.0219508
HNRNPAB	1.7742	1.26741	2.48362	0.000835445	0.00656894
CD320	1.42418	1.15733	1.75256	0.00083706	0.000948166
KRI1	1.71736	1.25033	2.35883	0.0008389	0.0260877
UPB1	0.871375	0.803732	0.944711	0.000839333	0.000156766
CHGA	1.21502	1.08377	1.36215	0.000839646	0.00263229
BUD31	1.63196	1.22422	2.1755	0.000839996	0.0104663
TMEM218	1.83713	1.28553	2.6254	0.000841331	0.0010313
RNF7	1.77316	1.26685	2.48183	0.000841545	0.000294571
TRIM45	1.29401	1.11226	1.50546	0.000844441	0.0453177
RBMX2	1.60277	1.21487	2.11453	0.000847859	0.0156186
SUPT7L	1.6494	1.22925	2.21315	0.000850139	3.56674e-05
SUPT3H	1.49018	1.1788	1.88381	0.000851765	0.0115569
CERS6	1.3866	1.14428	1.68022	0.000852108	0.0371002
INCENP	1.35108	1.13208	1.61245	0.000853365	0.00776665
DDOST	1.5707	1.2046	2.04804	0.000853442	0.000279617
SVBP	1.41823	1.15488	1.74164	0.00085621	0.000549757
BMI1	1.51786	1.18754	1.94007	0.000860251	0.0122946
POLE4	1.44857	1.1649	1.80132	0.000860428	0.00202926
MED7	1.76918	1.26483	2.47465	0.00086182	0.00946115
BRAP	1.92511	1.30951	2.8301	0.000863706	0.00704221
DAP3	1.67351	1.23563	2.26656	0.000877839	0.00365899
HRAS	1.42359	1.15617	1.75287	0.000878102	0.0091086
LIMK1	1.31022	1.11736	1.53637	0.000881473	0.00105336
SLC27A5	0.866729	0.796636	0.942988	0.00088635	0.047357
S100PBP	1.55801	1.19958	2.02352	0.000886611	0.00437917
RANGAP1	1.41762	1.15392	1.7416	0.000889717	0.0019595
MSTO1	1.52989	1.19054	1.96596	0.000890549	0.020476
S100A11	1.19907	1.07717	1.33475	0.000903055	0.00848795
EDC3	1.66875	1.23328	2.25798	0.000903384	0.00176821
OSGIN2	1.46558	1.16943	1.83673	0.000903571	0.000520682
VNN2	1.16418	1.06421	1.27354	0.000905111	0.00629251
PDK3	1.38419	1.14227	1.67734	0.000909297	0.0167562
OTUB1	1.72963	1.25127	2.39087	0.000909864	0.0283529
UBE2O	1.58936	1.20871	2.08989	0.000909912	0.00223943
IMMP1L	1.87194	1.29239	2.71139	0.000910286	0.0149912
ZFP41	1.47131	1.17099	1.84864	0.000915999	0.0118905
SLC22A7	0.897777	0.84232	0.956884	0.000917331	0.00615758
PNMA1	1.29523	1.11151	1.50931	0.000918008	0.0010394
CTU2	1.7074	1.24434	2.34278	0.000918902	0.0400445
CUEDC1	1.34876	1.13003	1.60981	0.000919304	3.43184e-05
PDCD10	1.55824	1.19869	2.02564	0.000919635	0.00969209
HELLS	1.32752	1.12266	1.56976	0.000923103	0.00101365
RAB7A	1.74436	1.25506	2.42442	0.0009246	0.0486517
COMMD2	1.54263	1.19362	1.9937	0.000925094	0.0446678
ELOC	1.57556	1.20395	2.06187	0.000925188	0.0220423
PJA1	1.42558	1.15576	1.75838	0.00092564	0.0254901
UBE2Z	1.4949	1.17831	1.89654	0.000928584	0.0155403
PRKAG1	1.85677	1.28719	2.6784	0.000931248	0.00091872
RMI2	1.25145	1.09582	1.42918	0.000931338	0.000278765
TAT	0.909278	0.859477	0.961964	0.000935272	0.00073225
HAUS6	1.45009	1.16353	1.80724	0.000938913	0.000677455
UBLCP1	1.64232	1.22405	2.20352	0.00093987	0.0230108
HNRNPR	1.52825	1.18863	1.96491	0.000941152	0.00584409
DTL	1.25383	1.09653	1.4337	0.000942017	0.00883919
RITA1	1.68502	1.23683	2.29562	0.000942378	0.0188275
EXTL3	1.41213	1.15087	1.73268	0.000945577	0.00554565
HAUS5	1.52011	1.18588	1.94854	0.000947417	0.00538794
KCTD7	1.5386	1.19172	1.98644	0.000947667	0.0167429
MTMR14	1.99353	1.32423	3.00111	0.000948203	0.0324411
DCTN5	1.56867	1.20106	2.04879	0.000950884	0.00610433
CAPRIN1	1.52984	1.18879	1.96873	0.000953939	0.00162825
E2F1	1.2162	1.08286	1.36596	0.000954359	0.00145123
ECM2	0.800679	0.701708	0.913609	0.000959559	0.00565992
AK6	1.93124	1.3064	2.85494	0.000966531	0.0237675
FAM220A	1.5868	1.20613	2.08761	0.000970061	0.0191608
PRKDC	1.38395	1.14096	1.67869	0.000971384	0.0439155
AUP1	1.88115	1.29221	2.73851	0.000974045	0.00177388
FHDC1	1.40638	1.14822	1.72257	0.00098161	0.00383072
KNTC1	1.3202	1.11916	1.55735	0.000982306	0.01433
ZNF765	1.73122	1.24882	2.39997	0.00099019	0.0135733
SAAL1	1.63461	1.2201	2.18995	0.000991054	0.0242341
SRSF9	1.56739	1.1995	2.04811	0.000992074	2.02538e-05
SPIN4	1.39097	1.14289	1.69288	0.000992577	0.00682669
CCNQ	1.55273	1.19488	2.01776	0.000994699	0.0036537
CARD9	1.61094	1.21271	2.13994	0.000997962	0.0113282
CYBC1	1.63383	1.21961	2.18875	0.000999306	0.0446677
IQCB1	1.47328	1.16963	1.85576	0.000999856	0.00068736
ATP1A1	1.2855	1.10688	1.49294	0.00100082	0.00102783
NAA15	1.62789	1.21762	2.17641	0.00100571	0.0209718
HEXB	1.66354	1.22829	2.25303	0.00100678	0.0306844
TOPBP1	1.4077	1.14808	1.72603	0.00101054	0.0113175
ADGRE5	1.26047	1.09797	1.44701	0.00101182	0.00555499
MND1	1.33134	1.12249	1.57905	0.00101212	0.0387069
MFN1	1.54636	1.19232	2.00554	0.0010166	0.000517321
LTV1	1.54923	1.19316	2.01155	0.00101846	0.00146086
RAB24	1.60318	1.2097	2.12463	0.00102001	0.00231583
SCML2	1.36406	1.13337	1.6417	0.00102201	0.000232312
MPHOSPH6	1.57771	1.20177	2.07124	0.00102528	0.00241448
HMGCS2	0.881799	0.818009	0.950564	0.00102599	0.000484705
SRP19	1.89781	1.29453	2.78223	0.00102869	0.00516768
GHR	0.827718	0.73934	0.926661	0.00103046	0.0243211
CCDC59	1.78955	1.26415	2.53332	0.00103156	0.0208438
PMS1	1.68053	1.23252	2.29139	0.00103251	0.00716545
TMEM14B	1.5589	1.19566	2.03247	0.001037	0.000592011
POLR1F	1.61702	1.21336	2.15498	0.00103893	0.0491615
TMEM104	1.54315	1.19066	2	0.00104222	0.00426978
HMBS	1.67369	1.23016	2.27711	0.00104301	0.0128027
HIKESHI	1.69526	1.23635	2.3245	0.00104816	0.00116212
SNRPA1	1.54075	1.18961	1.99553	0.001054	0.00367515
CALU	1.38487	1.13969	1.68278	0.00105564	0.00139062
C11orf49	1.37376	1.13594	1.66135	0.00105949	0.0271226
APOC1	0.845902	0.765268	0.935033	0.00105958	0.000601995
WASF2	1.46269	1.16486	1.83667	0.00106187	0.00742545
POC5	1.68494	1.23284	2.30284	0.00106336	0.000869771
UBE2M	1.5884	1.20393	2.09564	0.00106592	0.00739338
IGF2BP3	1.25638	1.09586	1.44042	0.00106616	0.0233059
CBX1	1.41103	1.14803	1.73428	0.00106902	0.00109527
SMPD2	1.56469	1.1966	2.04602	0.00106951	0.00329507
CRTC2	1.64072	1.21958	2.20728	0.00106956	0.0228515
DPH3	1.72163	1.24323	2.38413	0.0010731	0.00649885
CERS5	1.56251	1.19582	2.04163	0.00107359	0.0139527
POLR1A	1.56735	1.19723	2.0519	0.00107662	0.033216
BTNL9	0.747116	0.627304	0.889811	0.00107902	0.000379413
CENPQ	1.37126	1.13473	1.65709	0.00108158	0.000868427
NSD2	1.39173	1.14134	1.69706	0.00108942	0.00170633
DPM1	1.68743	1.23267	2.30994	0.00109228	0.0119305
KPTN	1.54251	1.1892	2.0008	0.00109247	0.000412094
VPS33A	1.77379	1.25741	2.50223	0.0010956	0.0151069
PIGF	1.79434	1.26311	2.54898	0.00109833	0.000783691
ANAPC1	1.68109	1.23057	2.29654	0.00110068	0.0018824
TET1	1.64015	1.2185	2.20771	0.00110102	0.00273735
EED	1.66196	1.22487	2.25504	0.00110365	0.00853459
VSIG10	1.42423	1.15162	1.76137	0.00110521	0.00216479
SAMD10	1.49965	1.17552	1.91317	0.00110855	0.00173416
SNRPG	1.66116	1.22448	2.25357	0.00110877	0.0403746
TNPO1	1.54074	1.18817	1.99793	0.00111247	0.0035837
TMPRSS6	0.867948	0.797076	0.945122	0.00111954	0.0010205
NME1	1.38181	1.13748	1.67862	0.0011241	0.0012054
EIF4E2	1.9224	1.29712	2.8491	0.00113015	0.012231
CSAD	0.784169	0.677372	0.907803	0.00113434	0.0095073
RORC	0.837445	0.75259	0.931867	0.00113578	0.0309629
ACACA	1.43114	1.15323	1.77603	0.00113735	0.00752233
TMEM199	1.75207	1.24982	2.45617	0.00113872	0.00360758
GOSR2	1.66842	1.22571	2.27102	0.00113958	0.00398625
BRMS1	1.55413	1.19161	2.02694	0.00113963	0.0106664
PPP2R3A	1.35806	1.12934	1.6331	0.00114343	0.00184521
CMTM7	1.35516	1.12836	1.62754	0.00114494	0.00314641
BORA	1.51069	1.1781	1.93716	0.00114642	0.0154735
STEAP1B	1.3752	1.1349	1.66638	0.00114822	0.000117691
DCLRE1C	1.52133	1.18132	1.95919	0.0011496	0.00493866
PMAIP1	1.32105	1.11691	1.56251	0.00115041	0.0100576
CNPY4	1.45964	1.16199	1.83352	0.00115276	0.00686
CDC34	1.63673	1.21594	2.20313	0.00115642	0.0141592
CPSF4	1.55039	1.19006	2.01984	0.001157	0.000809431
AURKA	1.26539	1.09789	1.45844	0.00115754	0.00179507
ANKRD24	0.671635	0.52824	0.853955	0.00116064	0.00056179
METTL5	1.74732	1.24774	2.44692	0.00116138	0.00137733
RELT	1.48199	1.16881	1.87908	0.0011632	0.0148817
ATP6V0D2	1.28182	1.10345	1.48902	0.00116361	0.000404724
PDZD11	1.57937	1.19859	2.08111	0.00116661	0.0175003
BUB3	1.65229	1.22021	2.23737	0.00116726	0.00184923
SGTB	1.53975	1.18656	1.99806	0.00116737	0.0185648
AK2	1.78101	1.25699	2.52347	0.00116846	0.00878794
SPPL3	1.57899	1.19833	2.08059	0.00117281	0.000112185
RXYLT1	1.84811	1.27533	2.67813	0.00117463	0.00175896
NCF2	1.23619	1.08758	1.40512	0.00117593	0.0180752
MRPL48	1.79224	1.25981	2.54968	0.00117809	0.000313539
NUDT1	1.31298	1.11377	1.54782	0.0011814	0.00457472
DNAJB4	1.35315	1.12712	1.62451	0.00118209	0.0433928
KCNJ11	1.26434	1.09721	1.45692	0.00118481	0.00168228
SLC7A1	1.24842	1.09171	1.42764	0.00118678	0.0436905
LRPPRC	1.60159	1.20449	2.12961	0.00119639	0.0193988
TMEM184B	1.38899	1.13857	1.69448	0.00119784	0.00315002
DHX57	1.63467	1.21404	2.20104	0.00120451	0.0412998
MRPS15	1.66132	1.2218	2.25894	0.00120494	0.00461746
NIF3L1	1.66666	1.22332	2.27068	0.00120613	0.00775553
PRIM2	1.49896	1.17313	1.91529	0.00120873	0.00937127
DUSP11	1.66043	1.22136	2.25734	0.00121166	0.0332113
EFNA5	1.22405	1.08294	1.38355	0.00121667	0.00323283
CARS1	1.52632	1.18131	1.97208	0.00121856	0.0025573
BUD13	1.69769	1.23188	2.33964	0.00121929	0.00851006
ERH	1.73332	1.24197	2.41906	0.00122035	0.0125327
RSU1	1.51223	1.17696	1.94299	0.00122036	0.00402751
RPL17	1.48754	1.16935	1.89232	0.00122069	7.32922e-05
SSR2	1.43829	1.15382	1.79289	0.00122718	0.0349726
FANCG	1.39349	1.13949	1.7041	0.00122981	0.0229828
WDR43	1.5664	1.19312	2.05645	0.00123193	0.00224462
ZNF622	1.72559	1.23931	2.40267	0.00123628	0.0105179
POLR3D	1.42102	1.14816	1.75872	0.00123763	0.00503937
DCTPP1	1.46	1.16043	1.83689	0.00123831	0.00259022
HNRNPA3	1.57801	1.19641	2.08133	0.0012399	0.0148961
SLC48A1	1.52045	1.17906	1.9607	0.00124012	0.00109157
N4BP2L1	0.714801	0.583028	0.876357	0.00124036	0.00805345
PSD4	0.706543	0.572239	0.87237	0.00124083	0.00883412
MCM3	1.31744	1.11444	1.55741	0.00124179	0.0003732
CAPG	1.19397	1.07214	1.32966	0.00124538	0.000546944
SLC26A11	1.51045	1.17578	1.94039	0.00125085	0.0050154
HSF2BP	1.6852	1.22741	2.31375	0.00125131	0.0473521
CYB561D1	1.45497	1.1586	1.82716	0.00125219	0.00387319
COA4	1.9009	1.28665	2.8084	0.00125676	0.0159141
MAP7D3	1.44751	1.15598	1.81257	0.00126776	0.0111598
SPTY2D1OS	1.57847	1.19568	2.08381	0.00127708	0.00135405
LRCH3	1.64022	1.21376	2.21652	0.00127765	0.0181794
SKP2	1.3114	1.11196	1.5466	0.00127819	0.0401226
ANO10	1.44422	1.15475	1.80626	0.00127872	0.00809615
C1orf43	1.71449	1.23463	2.38084	0.00129022	0.0193886
RNF115	1.64212	1.21397	2.22128	0.00129104	0.029056
RUBCN	1.60737	1.20384	2.14617	0.00129206	0.00543455
CEP250	1.56312	1.19076	2.05191	0.00129246	0.00220475
CCNE2	1.35755	1.12687	1.63546	0.00129547	0.00247675
IYD	0.806424	0.707301	0.919438	0.00130371	0.00552424
UBE3D	1.89431	1.28318	2.79651	0.00130632	0.0352307
NKX3-2	1.48698	1.1674	1.89405	0.00131065	0.000993871
GMFB	1.47434	1.16348	1.86825	0.00131262	0.000471855
ARFGAP1	1.6221	1.20759	2.17887	0.00131433	0.0113925
HACE1	1.55109	1.18658	2.02756	0.0013196	0.00978869
PRR7	1.30934	1.11071	1.54349	0.00132355	0.00357127
PFDN1	1.5791	1.1948	2.08701	0.00132369	0.00362102
SLC25A22	1.53231	1.18087	1.98833	0.00132392	0.0117435
GEMIN6	1.69462	1.22809	2.33838	0.00132483	0.00944946
VRK1	1.44068	1.15283	1.80041	0.00132513	0.00627249
GCNT3	1.18856	1.06958	1.32077	0.00132768	0.0340392
SLC25A51	1.49709	1.17007	1.91551	0.00133189	0.0212233
TRIM65	1.44939	1.15538	1.81821	0.00133373	0.0115769
STK11IP	1.53198	1.18055	1.98802	0.00133459	0.0410463
ME1	1.18378	1.06784	1.31232	0.00133705	0.0187669
FAM110D	0.658447	0.510081	0.849969	0.00133735	0.0321074
SUMO2	1.62154	1.20685	2.17872	0.00133836	0.0302617
TINAG	1.1357	1.05074	1.22754	0.00133948	0.00649977
GTPBP2	1.37892	1.1331	1.67807	0.00133983	0.00105496
EFCAB7	1.60631	1.20236	2.14596	0.00134148	0.00852004
CTHRC1	1.16095	1.05974	1.27181	0.00134176	0.00189455
CASQ2	0.668499	0.522639	0.855065	0.00134243	0.00326758
TAF13	1.616	1.20515	2.16691	0.00134259	0.0115052
GLRX2	1.57726	1.19373	2.084	0.00134704	0.0189206
NCOA5	1.51884	1.1763	1.96114	0.00135	0.0252176
TRPC1	1.38346	1.13434	1.68729	0.00135378	0.0314473
ABHD12	1.55456	1.18685	2.03618	0.00135537	0.0278506
KIAA1522	1.31079	1.11078	1.54682	0.00135715	0.00955842
PEF1	1.81969	1.26153	2.62482	0.00136054	0.023825
TBC1D10B	1.50191	1.17087	1.92654	0.00136626	0.00609997
MRPL11	1.66625	1.21886	2.27784	0.00137117	0.00379349
DEGS1	1.37939	1.13278	1.67969	0.00137147	0.00329858
LRP4	1.26555	1.09558	1.46188	0.00137184	0.000810122
CSF1	1.28466	1.10195	1.49768	0.00137348	0.00285115
CHCHD2	1.75357	1.24313	2.47358	0.00137473	0.00726678
TTLL4	1.27057	1.09722	1.47132	0.00137644	0.00319964
METTL18	1.52031	1.1761	1.96527	0.00138219	0.000357227
VOPP1	1.44761	1.15398	1.81597	0.00138321	0.000492871
DAGLA	1.28127	1.10071	1.49145	0.00138367	0.00492016
PUDP	1.36264	1.12724	1.64719	0.00138487	0.00170718
STT3A	1.51237	1.17353	1.94903	0.00139168	0.00189588
PSMG3	1.3818	1.13322	1.68491	0.00139363	0.000385565
FAM104A	1.5781	1.19294	2.08762	0.0013946	0.0249146
SUPT4H1	1.72082	1.23355	2.40056	0.00139483	0.0409661
CCDC93	1.46017	1.15744	1.84207	0.00140624	0.00194633
PIGX	1.54679	1.18349	2.0216	0.00140626	0.0201798
RIOK1	1.46057	1.15747	1.84304	0.00141171	0.0343289
TMEM165	1.41167	1.14231	1.74454	0.00141447	0.00126618
MRPS30	1.78908	1.25165	2.55726	0.00141559	0.0026489
HK2	1.18944	1.06922	1.32318	0.00141756	0.0199971
CDKN2AIPNL	1.49012	1.16631	1.90382	0.0014196	0.00167487
GTF2H3	1.48907	1.16597	1.9017	0.00142059	0.000144534
STMP1	1.85164	1.26805	2.70382	0.0014258	0.0450544
TLCD3A	1.28538	1.10161	1.4998	0.0014259	0.0048213
ASNS	1.21295	1.07725	1.36573	0.00142624	0.0139426
CKAP4	1.32744	1.11536	1.57986	0.00142683	0.00448157
FANCA	1.44179	1.15133	1.80552	0.0014341	0.000244249
MTPAP	1.66824	1.21784	2.28521	0.00143536	0.0132508
TTF2	1.42893	1.14728	1.77973	0.00143951	0.0441427
STK32B	1.48435	1.16406	1.89277	0.0014478	0.00594209
WDR76	1.27633	1.09835	1.48314	0.00145089	0.00239759
THUMPD3	1.71016	1.22911	2.3795	0.00145233	0.0373188
XPOT	1.37689	1.13081	1.67651	0.00145393	0.00798831
ACOT8	1.76003	1.24271	2.49271	0.00145432	0.0209856
RAD18	1.58283	1.19303	2.09999	0.00145502	0.0126172
PTPRN	2.81409	1.48796	5.32213	0.0014612	0.0119082
HES5	0.444995	0.270252	0.732726	0.00146183	0.0038358
CYB5D2	0.695355	0.555911	0.869778	0.00146397	0.0012324
GEMIN7	1.47595	1.1612	1.87601	0.00146651	0.000151312
CHPF2	1.52839	1.17686	1.98492	0.0014667	0.0265046
KIF3A	1.57024	1.18913	2.0735	0.00146686	0.00114059
INF2	1.42137	1.14447	1.76526	0.00146968	0.0123263
FFAR3	3.02969	1.52998	5.99944	0.00147314	0.00166934
EXOSC9	1.68956	1.22283	2.33442	0.0014751	0.00184671
EIF3CL	4.0154	1.70357	9.46447	0.00148431	0.00899369
STOML2	1.71955	1.23079	2.40241	0.00148796	0.0113027
TTLL7	1.39513	1.13602	1.71333	0.00149049	0.0233141
SHISA5	1.67623	1.21868	2.30556	0.00149356	0.0351641
VMA21	1.4795	1.16179	1.8841	0.00149408	0.000993461
UBE2D1	1.47067	1.15896	1.86621	0.00150436	0.00408615
FXR1	1.64025	1.20836	2.22651	0.00150439	0.00319206
PTGFRN	1.2668	1.09466	1.46602	0.00150539	0.0259445
MCRS1	1.64802	1.21032	2.24402	0.0015142	0.00523251
GPC1	1.23685	1.0846	1.41047	0.0015157	0.00136032
ANGPT2	1.33468	1.11658	1.59538	0.00151774	0.000208982
HNRNPL	1.67548	1.21769	2.30539	0.00152703	0.00116952
SRSF10	1.63796	1.20717	2.2225	0.00152883	0.000106601
PPIE	1.61858	1.20151	2.18041	0.00153747	0.00478239
KRBA1	1.30574	1.10703	1.54012	0.00153986	0.000303284
SLC26A6	1.35442	1.12257	1.63417	0.00154067	0.00927336
AGAP1	1.43348	1.14704	1.79146	0.00154515	0.0258724
QRSL1	1.67275	1.2165	2.30011	0.00154541	0.0112468
GON7	1.67657	1.21748	2.30877	0.0015487	0.001267
FOXJ3	1.48579	1.16272	1.89861	0.00155002	0.00426157
CYP27A1	0.833523	0.744632	0.933026	0.00155204	0.0185255
MZT1	1.44296	1.14981	1.81086	0.00155252	0.00333795
PPP2R5B	1.51892	1.17247	1.96775	0.00155332	0.000596376
MRPL10	1.55619	1.18322	2.04673	0.00155919	0.00525317
GNA12	1.41069	1.13983	1.74592	0.00156094	0.00312931
CCDC124	1.51956	1.17249	1.96938	0.00156278	0.0443788
FLAD1	1.56337	1.18515	2.06231	0.00156709	0.0252437
IGLON5	1.35522	1.12246	1.63626	0.00157001	0.00350769
DRAM2	1.52608	1.1742	1.98341	0.00157381	0.000531492
ETV1	1.29731	1.10372	1.52486	0.00159489	0.0111714
PARD6B	1.34408	1.11857	1.61505	0.00160069	0.0214236
SPAST	1.57809	1.18868	2.09509	0.00160278	0.00834188
UBA1	1.60836	1.19716	2.1608	0.00160785	0.00794511
CENPJ	1.45056	1.15123	1.82772	0.00160892	0.0178762
ZNF174	1.72688	1.22979	2.42489	0.00160952	0.00794674
PBDC1	1.59934	1.19454	2.14132	0.00161138	0.0123967
MITD1	1.5702	1.18613	2.07864	0.00161787	0.00237648
ARMC7	1.47652	1.15884	1.88127	0.0016179	0.000337455
CDC27	1.51311	1.1696	1.9575	0.00161931	0.0145973
FTH1	1.44602	1.14971	1.8187	0.00161945	0.00527226
CPB2	0.86685	0.793158	0.94739	0.00162036	0.00151036
PHB	1.61214	1.19787	2.16967	0.001625	0.00539913
MMD	1.26931	1.09429	1.47231	0.00163116	0.000383202
SPATA5	1.61751	1.1992	2.18174	0.00163371	0.0464084
TIPRL	1.60678	1.19618	2.15833	0.00163452	0.00537314
NET1	1.45624	1.15219	1.84052	0.00165782	0.00616313
NEDD1	1.41841	1.14071	1.76371	0.00166545	0.0088523
POLG2	1.47076	1.15636	1.87063	0.00166696	0.0212173
APEX1	1.63418	1.20308	2.21975	0.00167116	0.0083602
ZNF605	1.5035	1.1658	1.93902	0.00167827	0.00634658
USP21	1.46423	1.15423	1.85748	0.00167973	0.0485474
C8orf33	1.43509	1.14552	1.79785	0.00168075	0.00928362
RHOG	1.50332	1.16561	1.93887	0.00168677	0.0174253
FAM89B	1.59127	1.19077	2.12647	0.001688	0.0257433
POU3F2	1.68522	1.21658	2.33439	0.00169442	0.00459719
CDK2	1.35766	1.12171	1.64324	0.00169463	0.0311335
SRP68	1.62069	1.19883	2.19099	0.00169607	0.0176024
TDP1	1.61834	1.19809	2.18601	0.00170073	0.00316383
YDJC	1.46113	1.15293	1.85172	0.0017054	0.0130029
RP11-435I10-4	5.41805	1.88396	15.5817	0.00171782	0.0377987
SMG9	1.42571	1.14215	1.77968	0.00172053	0.00222638
BCOR	1.36817	1.12463	1.66446	0.00172246	0.00496098
GSK3A	1.59744	1.1917	2.14131	0.00172996	0.00280897
TRIM37	1.41749	1.13953	1.76326	0.00173158	0.00209737
ARHGEF2	1.30237	1.10396	1.53645	0.00173197	0.0200416
RGN	0.843492	0.758285	0.938275	0.00173277	0.00215461
RHOC	1.44142	1.14663	1.81199	0.00173555	0.00174371
DMGDH	0.849745	0.76741	0.940914	0.00174081	0.000355256
POLR2D	1.70576	1.22099	2.38299	0.00174561	0.00677207
FAM126A	1.48817	1.16011	1.90899	0.00175479	0.019518
LUC7L3	1.49875	1.16318	1.93113	0.00175548	0.0056461
SRP72	1.59637	1.19088	2.13992	0.00175769	0.0459567
ARF4	1.52084	1.16945	1.97782	0.0017616	0.000457014
ACTG1	1.45052	1.1489	1.83133	0.00176604	0.00591941
FASTKD3	1.58607	1.1878	2.11788	0.00176887	0.00404385
ME2	1.42598	1.14155	1.78129	0.00177056	0.0234467
HOMER3	1.23386	1.0815	1.40768	0.00177751	0.000580307
OXLD1	1.4256	1.14121	1.78085	0.00178702	0.0397854
ICMT	1.48946	1.15999	1.9125	0.00178708	0.000240535
FAM156A	123.802	6.01921	2546.33	0.00178747	0.038977
ODC1	1.30099	1.10295	1.5346	0.00179068	0.00898831
FBXL7	1.28739	1.09863	1.50857	0.0017912	0.00334943
NOL6	1.56648	1.18187	2.07626	0.00179386	0.0371496
F13B	0.874108	0.803311	0.951143	0.0017942	0.0167358
DPM2	1.42301	1.14022	1.77595	0.00180388	0.0290901
RBM15B	1.64506	1.20327	2.24906	0.00181051	0.038548
LGALS3	1.18659	1.06564	1.32127	0.00181533	0.0055863
TM4SF19	1.31129	1.10594	1.55476	0.00181614	0.00139062
XPNPEP1	1.65432	1.20557	2.27012	0.00182141	0.0135844
SMC4	1.24524	1.08483	1.42937	0.00182617	0.0437403
ABI2	1.44525	1.14647	1.82189	0.00182835	0.0170799
ECHS1	0.684001	0.538677	0.868532	0.00182939	0.0427426
CAPZA1	1.48801	1.1589	1.91058	0.00183152	0.0217906
IFT52	1.40499	1.13444	1.74007	0.00183431	0.0102532
CXCL5	1.13143	1.04686	1.22282	0.00183716	0.0199822
DAD1	1.77643	1.23751	2.55005	0.0018375	0.0308049
ATG13	1.81113	1.24632	2.6319	0.00184151	0.0157567
YME1L1	1.51097	1.16529	1.95919	0.00184533	0.0293823
PRRT3	1.63219	1.19885	2.22216	0.00185817	0.00120409
WDR35	1.4545	1.14872	1.84168	0.0018624	0.00779864
FLNC	1.14844	1.05255	1.25306	0.00186277	0.0218815
SF3B2	1.77786	1.23714	2.55493	0.00186963	0.0139602
AAR2	1.81646	1.24695	2.6461	0.00187219	0.00287719
DCK	1.33944	1.11402	1.61046	0.00188063	0.0130318
DDX52	1.59428	1.18802	2.13947	0.00188378	0.00376575
HPDL	1.3021	1.10229	1.53813	0.00189768	0.0438122
GNAZ	1.19174	1.06685	1.33127	0.00189977	0.044428
HTATIP2	1.38765	1.1284	1.70647	0.00190446	0.0127586
C20orf144	2.59304	1.42062	4.73303	0.0019122	0.00363832
SIRT7	1.46529	1.15104	1.86534	0.00192168	0.0496498
TBP	1.58906	1.18592	2.12925	0.00192173	0.0316896
PTBP2	1.48974	1.15803	1.91647	0.0019247	0.0363023
ZSWIM1	1.56264	1.17857	2.07187	0.00192498	0.00651052
DMAP1	1.67581	1.20918	2.32251	0.00193052	0.021329
ADGRG3	1.23016	1.07915	1.4023	0.00193606	0.000690097
MRPS7	1.71918	1.22024	2.42212	0.00194822	0.010496
SART1	1.76327	1.23154	2.5246	0.0019532	0.0421314
DYNC2I2	1.30422	1.10239	1.54299	0.00195859	0.00133076
RAP1A	1.64694	1.20093	2.25858	0.00195967	0.0131707
DPF2	1.57535	1.18144	2.1006	0.00196387	0.00208493
RNPS1	1.5479	1.17382	2.04119	0.00196542	0.0112344
THOC1	1.56848	1.17949	2.08576	0.00196702	0.00072441
ZNF713	1.94548	1.27629	2.96554	0.00197331	0.0132041
ADRM1	1.73324	1.22316	2.45603	0.00198361	0.0236714
ZNF202	1.58092	1.18261	2.11337	0.00198504	0.012287
PEDS1	1.4079	1.13345	1.74881	0.0019868	0.0253465
ZC4H2	1.39797	1.13048	1.72876	0.00198985	0.0343724
GTF3C3	1.59602	1.18658	2.14676	0.00199453	0.0205479
TULP3	1.39864	1.13062	1.73021	0.00199477	0.00079088
DCAF16	1.33833	1.11252	1.60998	0.00199606	0.0105399
CDKN2C	1.24545	1.08358	1.4315	0.00200191	0.000696505
FANCF	1.50222	1.16043	1.94467	0.0020041	0.0127633
NUP210	1.33808	1.11235	1.6096	0.00200469	0.0146082
BCL11A	1.41663	1.13579	1.76691	0.0020055	0.0494702
DSN1	1.37426	1.12303	1.68169	0.00202563	0.00610028
MFAP2	1.22201	1.07591	1.38794	0.00202654	0.0276753
C6	0.875743	0.804972	0.952735	0.00202766	0.0389057
RAB35	1.57662	1.18065	2.10539	0.00203332	0.00654159
EHMT2	1.39663	1.12951	1.72691	0.00203965	0.00500683
THOC2	1.44581	1.14383	1.82752	0.0020412	0.00368651
ARL6IP4	1.50235	1.15992	1.94587	0.00204261	0.0110383
TBCD	1.53162	1.16802	2.00842	0.00204853	0.00341208
PABPC1	1.34897	1.11521	1.63173	0.00204902	0.0213931
PGK1	1.35009	1.11545	1.63409	0.00205854	0.00267687
KNG1	0.892223	0.829794	0.95935	0.00206123	0.00714053
UGGT2	1.56352	1.17661	2.07767	0.00206188	0.0200861
SMUG1	1.71377	1.21645	2.41441	0.00206723	0.00557882
HMGB2	1.27934	1.09372	1.49645	0.00206899	0.0007689
ADH1C	0.916293	0.86671	0.968712	0.00207091	0.0154391
HAX1	1.61937	1.19145	2.20097	0.00207837	0.0328856
SMARCC1	1.45013	1.14451	1.83736	0.00208564	0.00154429
MID1IP1	1.30474	1.1014	1.54561	0.00208891	0.000563599
OPN1SW	1.35408	1.11633	1.64246	0.00209009	0.00100235
ENOPH1	1.47167	1.15053	1.88244	0.00209522	0.00657109
RTL8C	1.27838	1.09321	1.49492	0.00209611	0.00119899
TYRO3	1.21223	1.07231	1.3704	0.0021003	0.0143012
HROB	1.32261	1.10672	1.5806	0.00210303	0.00409166
CCDC22	1.67712	1.20602	2.33224	0.00211657	0.0315035
GPT	0.847451	0.762515	0.941847	0.00212745	0.00323995
FAM111B	1.24929	1.08389	1.43993	0.00212814	0.0277086
CCAR1	1.48101	1.15271	1.9028	0.00213001	0.00201223
PRDX4	1.48999	1.15523	1.92175	0.00213077	0.00504566
PSPH	1.27586	1.09214	1.49047	0.00213282	0.00598886
ACADS	0.717022	0.579849	0.886645	0.00213723	0.00222663
EMC8	1.69759	1.21091	2.37988	0.00213926	0.00193162
TMEM220	0.801225	0.695519	0.922997	0.00214074	0.000939518
RNPEPL1	1.62076	1.19072	2.2061	0.00214358	0.00144601
RP9	1.60845	1.1874	2.1788	0.00214622	0.00889935
RIPK2	1.3372	1.11072	1.60986	0.00214738	0.000755251
FIGNL1	1.37301	1.12134	1.68115	0.0021506	0.0114097
CDK5R1	1.42749	1.13717	1.79194	0.00215539	0.0125893
BRI3BP	1.39131	1.12667	1.71811	0.00215566	0.0032391
TRMT1	1.52362	1.16424	1.99394	0.00215596	0.0170762
FOXD2	1.39301	1.1271	1.72166	0.00216195	0.00964846
PSENEN	1.47136	1.14954	1.88329	0.00216523	0.0126288
DNMT1	1.30485	1.10075	1.54679	0.00216878	0.0280605
SRSF7	1.67304	1.20398	2.32485	0.00217108	0.0152794
SLCO2A1	0.824756	0.729167	0.932876	0.00217312	0.00083664
PAFAH1B2	1.59374	1.18304	2.14702	0.00217319	0.0203366
TMEM262	2.18994	1.32669	3.61488	0.00217341	0.000184635
TMEM50A	1.55906	1.17363	2.07107	0.00217696	0.0414441
RRP7A	1.45211	1.14386	1.84343	0.00218376	0.0114051
TMCC1	1.31055	1.10234	1.55809	0.00218544	0.0237089
PUM3	1.43418	1.13864	1.80642	0.00219317	0.0280132
B3GNT9	1.26954	1.08969	1.47908	0.00219929	0.0242221
CELSR3	1.34312	1.11189	1.62245	0.00221223	0.000100991
DENND5A	1.44383	1.14115	1.82679	0.00221376	0.000952045
MFSD12	1.51787	1.16177	1.98313	0.00221958	0.00408301
ABCA9	0.72115	0.58487	0.889184	0.00222079	0.0142802
DMAC2	1.65939	1.19955	2.29552	0.00222172	0.00712014
TERB2	0.618371	0.454446	0.841426	0.00222343	0.0499815
USP13	1.44545	1.14137	1.83054	0.00223393	0.000671659
FBN2	1.90393	1.25987	2.87725	0.00223949	0.0170955
VDAC2	1.55135	1.17058	2.05598	0.00224249	0.00786174
SLF1	1.62827	1.19107	2.22596	0.00224306	0.0264571
WDR70	1.7501	1.22228	2.50586	0.00224389	0.0392082
DNMT3A	1.35603	1.11536	1.64863	0.00224931	0.0300611
DPYSL4	1.30972	1.10155	1.55723	0.00225027	0.0020699
UBE2F	1.84174	1.24468	2.72522	0.0022522	7.41646e-05
EIF4E	1.68191	1.20475	2.34804	0.00225676	0.0052258
HS2ST1	1.48056	1.15093	1.90459	0.00225832	0.00716617
TFE3	1.522	1.16237	1.99291	0.0022587	0.0115543
GSS	1.66855	1.20113	2.31788	0.00226767	0.0044256
BUD23	1.71548	1.21307	2.42596	0.00226984	0.0023836
TK1	1.23388	1.0781	1.41217	0.00227323	0.0157505
TRAF2	1.43438	1.1377	1.80843	0.00227955	0.035089
KLRB1	0.781981	0.667708	0.915812	0.00228056	0.0222517
MASP2	0.891666	0.828346	0.959826	0.00228091	0.0324553
ELFN1	0.861843	0.783299	0.948262	0.00229152	0.00422658
MTHFS	0.799445	0.692298	0.923174	0.0022981	0.000217179
KLC2	1.36956	1.11881	1.6765	0.00230318	0.0279017
SUGCT	0.765379	0.644409	0.909058	0.00231742	0.0177574
SLC6A1	0.874019	0.801481	0.953123	0.00231871	0.0154347
BRD8	1.4959	1.15441	1.93841	0.00231928	0.000669263
TTYH3	1.25341	1.08382	1.44955	0.00232649	3.0769e-05
PLOD1	1.42208	1.13362	1.78394	0.00233233	0.03135
CCDC24	1.31698	1.10293	1.57258	0.00234574	0.00199108
MFF	1.57101	1.17436	2.10163	0.00234606	0.0348554
FIBCD1	1.31084	1.10107	1.56057	0.00234926	0.0353857
SYNGR4	1.34608	1.11141	1.6303	0.00236052	0.00840319
VPS29	1.73162	1.21543	2.46705	0.00236385	0.00790947
SGCB	1.23091	1.07661	1.40732	0.00236396	0.0367362
CYB5RL	1.56314	1.17197	2.08486	0.00236668	0.00191409
MED15	1.49234	1.15274	1.93198	0.00237433	0.00214537
SPATA24	1.47361	1.14752	1.89237	0.00237955	0.0091312
E2F4	1.53043	1.16293	2.01405	0.00238694	0.0156497
ITPA	1.4511	1.14116	1.84524	0.00238938	0.000669688
RPS19BP1	1.46788	1.14575	1.88057	0.00239511	0.00677865
PABPN1	1.57376	1.17432	2.10906	0.00239973	0.029315
CARD10	1.32646	1.10527	1.59192	0.00240271	0.00654429
ZC3H15	1.58866	1.17811	2.14228	0.00240955	0.00443029
TYMS	1.22907	1.07576	1.40422	0.00241081	0.00598691
BMT2	1.4848	1.15022	1.91671	0.00241103	0.0109197
FMO3	0.896794	0.835856	0.962176	0.00241431	0.00253742
GART	1.5677	1.17242	2.09625	0.0024212	0.0461896
ZBTB9	41.9668	3.75005	469.649	0.00242427	0.00356261
IL18RAP	0.588015	0.417159	0.828847	0.0024315	0.000436141
HCFC1	1.46164	1.14355	1.86821	0.00243607	0.0054238
ABCF3	1.83598	1.23951	2.71949	0.00243629	0.0368924
DENND6A	1.57457	1.17399	2.11184	0.00243837	0.00494612
GCDH	0.733725	0.600545	0.89644	0.00244767	0.0233196
MAPK3	1.51147	1.15702	1.97451	0.00244836	0.00674353
ACSL3	1.39707	1.12526	1.73455	0.0024539	0.0145476
MRPL36	1.62089	1.18583	2.21556	0.00245488	0.00141355
ZKSCAN4	1.45689	1.14199	1.85862	0.00245722	0.00514129
DPAGT1	1.59881	1.18005	2.16617	0.00245848	0.0157228
SRI	1.32969	1.10561	1.5992	0.00247686	0.0100103
P2RX4	1.37137	1.11769	1.68263	0.00247766	0.0394701
SLC30A6	1.50129	1.1539	1.95328	0.00247815	0.00114544
PRPF6	1.65589	1.19437	2.29575	0.00248223	0.0276308
SEH1L	1.67061	1.198	2.32966	0.00248832	0.00978842
ARL2	1.26272	1.08548	1.4689	0.0025039	0.00422751
ITGAV	1.2268	1.07447	1.40073	0.00251339	0.0265114
POGLUT2	1.29314	1.0945	1.52783	0.00251813	0.0247568
ATP6V1E1	1.63395	1.18811	2.24708	0.00252609	0.00329231
XPO1	1.5073	1.15492	1.9672	0.00252696	0.0229003
HS1BP3	1.5304	1.1611	2.01717	0.00252721	0.00539179
CUL4B	1.47093	1.14499	1.88965	0.00253341	0.0253784
PLCH1	1.56051	1.16891	2.08331	0.00253938	0.00572814
OPTN	1.50806	1.15495	1.96914	0.00254169	0.0444564
MRPS5	1.84156	1.23876	2.73771	0.00254182	0.0421932
C2orf68	1.58801	1.176	2.14436	0.00254579	0.010451
CNTNAP1	1.27584	1.08913	1.49455	0.00254845	0.0212988
FAM102B	1.34827	1.11041	1.63708	0.00254861	0.00748515
RAB38	1.26156	1.08477	1.46717	0.0025598	0.00215369
STYXL1	1.41789	1.13005	1.77904	0.00256086	0.00290543
DYRK2	1.35158	1.11124	1.6439	0.00256313	0.0138607
GYS2	0.893634	0.830629	0.961418	0.0025722	0.000202467
SRSF3	1.63522	1.18763	2.2515	0.00258002	0.00645124
OIP5	1.26186	1.08468	1.46798	0.00258744	0.000736804
STARD3	1.58533	1.17466	2.13956	0.00259224	0.00601443
ILDR2	1.26451	1.08541	1.47316	0.00259794	0.0208274
BAIAP2L2	1.16466	1.05462	1.2862	0.00261233	0.0181434
SURF6	1.7349	1.21157	2.48429	0.00263306	0.0159294
TBRG4	1.67346	1.19639	2.34077	0.00263685	0.00168526
NQO1	1.09351	1.03162	1.15913	0.00263923	0.0114939
ANKRD52	1.35707	1.11212	1.65597	0.00264446	0.00170399
ERAL1	1.63992	1.18759	2.26452	0.00266327	0.00261747
KARS1	1.65414	1.19114	2.29712	0.00266494	0.0476843
UNC5B	1.23809	1.07703	1.42322	0.00266738	0.00461246
FKBP4	1.44366	1.13607	1.83454	0.00266893	0.000889025
LRRC59	1.46163	1.14094	1.87245	0.0026712	0.0376859
CSNK2A2	1.60866	1.17953	2.19391	0.00267362	0.0266684
SLC22A25	0.835819	0.743493	0.939611	0.00267381	0.00861387
TREM2	1.18979	1.0622	1.33271	0.00267733	0.017669
GADD45G	0.836005	0.743709	0.939755	0.00269107	0.00438896
STEAP4	0.778839	0.661495	0.916999	0.0027004	0.0211114
COPS6	1.61617	1.18107	2.21157	0.00270059	0.00366825
IFT80	1.33682	1.10585	1.61603	0.00270329	0.0266385
KRTCAP2	1.51687	1.1553	1.99158	0.00270744	0.0139295
HEATR3	1.61499	1.18058	2.20924	0.00271386	0.00838188
MTRF1L	1.69324	1.19997	2.38928	0.0027213	0.0201402
GINS2	1.27973	1.0891	1.50373	0.00272504	0.0151746
CSNK2A3	2.50894	1.37467	4.57914	0.00273021	0.0179223
PARL	1.75115	1.21364	2.52673	0.00274455	0.0100667
TSN	1.52085	1.15589	2.00103	0.00274647	0.0415959
SPNS1	1.51454	1.15416	1.98746	0.00275316	0.0107763
KITLG	1.2812	1.08932	1.50688	0.00275859	0.0429755
POP5	1.59453	1.17475	2.16433	0.00276151	0.027031
GINS3	1.4184	1.1282	1.78326	0.00276504	0.00912493
HDAC5	1.50413	1.15114	1.96536	0.00277701	0.0321565
NAXE	1.48026	1.14481	1.91402	0.00277729	0.00259801
PRKAR2A	1.51267	1.15338	1.9839	0.00277816	0.0112075
ARMC10	1.72221	1.20581	2.45976	0.00279895	6.39636e-05
NOC4L	1.60974	1.17808	2.19957	0.00280006	0.00430902
DEDD	1.59884	1.17525	2.17511	0.00280586	0.025816
RAD51D	1.51681	1.15413	1.99346	0.00280709	0.00523283
NABP1	1.38743	1.11926	1.71985	0.00280768	0.0369121
TMX2	1.66633	1.19194	2.32954	0.00281668	0.00822545
MAPRE1	1.34875	1.10834	1.6413	0.00281842	0.00908883
HMCES	1.79968	1.22383	2.64649	0.00282138	0.0297266
SEC14L2	0.861315	0.780918	0.949989	0.00282522	0.0101123
IMPDH2	1.39511	1.12123	1.7359	0.0028257	0.00906537
BCL9	1.28062	1.08866	1.50642	0.00283385	0.0467737
USP48	1.56241	1.16545	2.09456	0.00284728	0.00446716
B4GALT4	1.48438	1.14508	1.92422	0.00285387	0.010644
PLIN3	1.36868	1.11363	1.68215	0.00285618	0.0348477
LAMTOR5	1.57489	1.16852	2.12258	0.00285668	0.0094487
MYO19	1.3743	1.11512	1.69373	0.00286532	0.0304429
CISH	0.775795	0.656562	0.916681	0.00286596	0.0227769
HPCAL1	1.65812	1.18918	2.31198	0.00286793	0.0231123
SRSF12	1.49199	1.14689	1.94092	0.00287198	0.0290908
HRG	0.920863	0.872274	0.972158	0.00287363	0.00118162
VANGL1	1.38763	1.11872	1.72119	0.00287621	0.00284114
ORC4	1.57606	1.16852	2.12573	0.00288092	0.0488598
TMEM223	1.61576	1.1782	2.21581	0.00290447	0.0475266
XRN2	1.45127	1.13571	1.85451	0.00290811	0.000324104
MEAK7	1.35902	1.11037	1.66335	0.00292557	0.0024687
CYP7A1	0.909083	0.853752	0.968001	0.0029295	0.021023
KCTD2	1.47481	1.14174	1.90505	0.00293061	0.00174932
SPSB2	1.38854	1.11841	1.72391	0.0029416	0.00787994
LRR1	1.46264	1.13829	1.8794	0.00295346	0.0269153
RHOA	1.67905	1.19304	2.36305	0.00295561	0.0155289
PCNP	1.51231	1.15123	1.98664	0.00296135	0.00404813
TCN2	1.31134	1.09667	1.56803	0.00296182	0.0108353
PIGC	1.43375	1.1305	1.81835	0.00296208	0.0154025
MAP4	1.46811	1.13965	1.89124	0.0029624	0.00307783
CCDC28B	1.25691	1.08095	1.46152	0.0029637	0.0221667
MATN3	1.16585	1.05357	1.29009	0.00297715	0.00627198
KLHL23	1.30017	1.09337	1.54608	0.00297836	0.00529068
OTUD7B	1.53367	1.1565	2.03385	0.002982	0.0107053
ZBTB41	1.32768	1.10104	1.60096	0.00299868	0.0246609
LSM12	1.50206	1.14816	1.96505	0.0029993	0.0470641
CHCHD3	1.48974	1.14493	1.93841	0.00300143	0.0070831
ADAM15	1.3425	1.10513	1.63087	0.00300823	0.0206941
DDTL	0.782828	0.665914	0.920269	0.00300964	0.0068389
SELENOF	1.60566	1.17428	2.19551	0.00301376	0.017299
PRMT1	1.40549	1.12233	1.76011	0.00302394	0.00743302
EXTL2	1.43645	1.13052	1.82517	0.00303756	0.0047213
VASP	1.35431	1.10817	1.65512	0.0030413	0.00120508
NEMP1	1.30951	1.09552	1.56529	0.00305507	0.0200831
TRMT112	1.66286	1.18757	2.32835	0.00306737	0.00945011
SYNGR2	1.41096	1.12342	1.77209	0.00306772	0.0052083
CEP126	1.62356	1.17798	2.23768	0.00306949	0.0176034
MPP3	1.30164	1.09318	1.54985	0.00307178	0.0460063
SNW1	1.62431	1.17804	2.23963	0.00307946	0.00867118
PLEKHH1	1.44885	1.13339	1.85212	0.00308282	0.00111097
BCCIP	1.75872	1.21001	2.55626	0.00308587	0.038879
PUS7	1.38577	1.11642	1.72011	0.00309017	0.00970595
ITIH1	0.886984	0.819234	0.960338	0.00309431	0.0007456
CDC16	1.58216	1.16743	2.14422	0.00309567	0.0235192
TUBA1B	1.26552	1.08269	1.47923	0.00309797	0.00627788
MIS18BP1	1.36531	1.11077	1.67818	0.00309803	0.00832524
RBX1	1.5726	1.16496	2.12287	0.00310293	0.0399459
MAP2K2	1.50651	1.14817	1.97669	0.00310671	0.00846936
EXOG	1.56643	1.16329	2.10928	0.00311366	0.00562136
WDR3	1.41561	1.12424	1.78249	0.00311669	0.0206658
CCDC149	1.44463	1.13192	1.84372	0.00312064	0.000737263
TJAP1	1.48834	1.14322	1.93765	0.00313316	0.000557541
MKKS	1.39356	1.11813	1.73683	0.00313935	0.00500009
CSNK1E	1.37976	1.11433	1.7084	0.00314651	0.0027916
STRN4	1.46816	1.13785	1.89437	0.00314673	0.00665123
PCID2	1.47376	1.13926	1.90646	0.00315068	0.0128257
HNRNPA1P48	1.50294	1.14673	1.9698	0.00315787	0.0414544
ZNF280C	1.5464	1.15774	2.06555	0.00316028	0.0216266
SYBU	0.827765	0.730099	0.938496	0.00316845	0.00208691
NANS	1.6223	1.17639	2.23724	0.00317128	0.00307463
LSM5	1.52747	1.1528	2.02391	0.00317476	0.00564539
LIN9	1.34089	1.10343	1.62944	0.00318088	0.00101461
CENPP	1.72189	1.19998	2.47081	0.00318384	0.0353352
DDX50	1.56578	1.16231	2.10932	0.00318517	0.0151598
ANKLE2	1.52694	1.1525	2.02304	0.00319067	0.026839
NUP188	1.39598	1.11812	1.74289	0.00321961	0.0396836
TCF19	1.21053	1.06602	1.37464	0.00322355	0.00245007
KNSTRN	1.39354	1.11736	1.73798	0.00323305	0.0451743
NUTF2	1.44541	1.13098	1.84727	0.00324694	0.007982
AKR1C3	1.29567	1.09034	1.53967	0.00325654	0.0132071
MAGEA12	1.11461	1.03689	1.19815	0.00325943	0.0295955
JAGN1	1.68006	1.18896	2.37401	0.00327038	0.00734987
DHRS1	0.757906	0.63002	0.91175	0.00328429	3.91027e-05
MRM2	1.65753	1.18337	2.32166	0.00328934	0.000974543
CYB5R3	1.44165	1.12958	1.83994	0.00329386	0.00508496
ATG10	1.65945	1.18367	2.32648	0.00330231	0.00423734
IL4I1	1.19422	1.06087	1.34433	0.00330323	0.0496364
SEC61G	1.39874	1.11816	1.74972	0.00330642	8.68723e-05
RFWD3	1.39945	1.11835	1.75122	0.00330718	0.0499572
SWI5	1.43223	1.12696	1.82017	0.00331087	0.0218808
PAPSS1	1.34743	1.10428	1.64412	0.00331501	0.0172004
NPL	1.23687	1.07326	1.42542	0.00331819	0.0455812
ACSM2A	0.88276	0.812251	0.95939	0.00332403	0.00671545
RBM12	1.45479	1.13266	1.86855	0.0033313	0.00645753
CYTH2	1.4668	1.13571	1.89443	0.00333687	0.00376781
RNF26	1.43576	1.12766	1.82802	0.00333696	0.000517314
OAZ1	1.46994	1.13643	1.90133	0.00334525	0.000687661
PFN4	1.3428	1.10275	1.63511	0.00335423	0.0283341
ADCK1	1.66264	1.1836	2.33557	0.00336711	0.00554412
YY1AP1	1.48217	1.1393	1.92822	0.00337344	0.0335057
TOP2B	1.4542	1.13203	1.86806	0.00338454	0.0422844
TFF2	1.12403	1.03948	1.21547	0.00338657	0.00309369
KLF2	0.767787	0.643387	0.916241	0.00339084	0.00729021
PACS2	1.50066	1.1437	1.96902	0.00340266	0.00694992
EXOC3	1.59254	1.16631	2.17453	0.00341106	0.0225284
EID2B	1.44138	1.1284	1.84116	0.00342076	0.0248043
IGFBP4	0.756376	0.627397	0.91187	0.00342096	0.0484155
ACTR3	1.46639	1.13482	1.89483	0.00342194	0.0159595
CCL14	0.712989	0.568468	0.894253	0.00342232	0.008688
CNPY2	1.55609	1.15727	2.09237	0.00342571	0.00612634
TLK2	1.62568	1.1741	2.25095	0.00342636	0.00946553
LAMB1	1.20677	1.064	1.3687	0.00343807	0.00483329
PIGM	1.52595	1.14968	2.02537	0.00343846	0.0432946
IPP	1.48588	1.13949	1.93759	0.00345393	0.0469951
C17orf58	1.43212	1.12569	1.82197	0.00345776	0.00917567
C1orf109	1.44344	1.1286	1.84612	0.00345997	0.00309233
MYPOP	1.5564	1.15696	2.09374	0.00346129	0.000377696
COPZ1	1.71874	1.19538	2.47125	0.00346471	0.00985353
DDX39A	1.35512	1.10511	1.6617	0.00349541	0.0471343
CYREN	1.40232	1.1176	1.75959	0.00349886	0.000104267
SZRD1	1.51108	1.14533	1.99364	0.00350466	0.00114582
PKIA	1.31389	1.09388	1.57816	0.00350493	0.0190219
DNAJC13	1.43447	1.12582	1.82774	0.00351478	0.0122287
PER1	0.772454	0.649492	0.918695	0.00351632	0.0127552
USF1	1.5985	1.16648	2.19052	0.00352441	0.0135978
CHAF1A	1.33968	1.10075	1.63049	0.00352665	0.0322331
PLAUR	1.2334	1.07126	1.4201	0.00353265	0.0156155
MED17	1.559	1.15675	2.10111	0.00354156	0.0360167
EEF1AKNMT	1.49729	1.14153	1.96392	0.00354196	0.00115111
DAP	1.43223	1.12498	1.82341	0.0035474	0.00398289
BOLA1	1.46008	1.13209	1.88308	0.00354864	0.0267188
ARHGAP1	1.37818	1.11078	1.70996	0.0035616	0.00810853
BTBD10	1.45959	1.13182	1.88228	0.00356527	0.0335844
HAO1	0.88811	0.819985	0.961896	0.0035683	0.0197594
UBAC2	1.52619	1.14827	2.02851	0.00358735	0.0338913
RPUSD1	1.45784	1.13113	1.87891	0.0035944	0.00978103
HSD17B12	1.42906	1.12376	1.81731	0.00359737	0.0110439
MYL6B	1.30059	1.08968	1.55233	0.00359921	0.000877244
NR2C2AP	1.40877	1.11849	1.77439	0.0036013	0.0457179
TTLL5	1.56822	1.15835	2.12313	0.00360284	0.0074945
SORD	0.841888	0.74976	0.945338	0.00360714	0.00215776
ZFPL1	1.61892	1.17027	2.23956	0.00361884	0.00731249
WDR92	2.15998	1.28549	3.62937	0.00363235	0.0363197
USP24	1.48469	1.13752	1.93781	0.00363597	0.0020939
MICALL1	1.40093	1.11616	1.75837	0.00364029	0.00656929
NTAQ1	1.38589	1.1122	1.72692	0.00364509	0.00467111
PANK2	1.70263	1.18929	2.43753	0.00365021	0.00481792
FAM222B	1.39872	1.11542	1.75398	0.00366211	0.0297722
CCDC6	1.44413	1.12702	1.85047	0.00366996	0.0234948
NPLOC4	1.48837	1.13812	1.9464	0.0036719	0.00868544
UBXN11	1.3341	1.09825	1.62061	0.00368256	0.00130122
CCDC50	1.48513	1.1372	1.93951	0.00368448	0.00146576
NDOR1	1.39144	1.11324	1.73916	0.00370106	0.014361
PARP12	1.45913	1.13052	1.88324	0.0037039	0.0471422
ZNF639	1.57603	1.15917	2.14279	0.00370396	0.0310993
PAQR7	1.3198	1.09427	1.59181	0.00370562	0.0219357
TUSC2	1.64288	1.17485	2.29736	0.00370952	0.0442108
RRAS2	1.35635	1.10397	1.66643	0.0037133	0.00468427
SOCS7	1.36874	1.10719	1.69207	0.00371844	0.00776605
CD151	1.29925	1.08864	1.55062	0.00371868	0.0225646
ALAS1	0.799592	0.68744	0.93004	0.00372488	0.0221578
CYHR1	1.4779	1.135	1.92439	0.00372956	0.00472638
RNF114	1.65914	1.17832	2.33617	0.00373436	0.00821195
RP11-468E2-6	0.428359	0.241466	0.759906	0.00374679	0.00279957
DDX49	1.52811	1.14717	2.03555	0.00375016	0.0208894
MRPS16	1.80756	1.21121	2.69752	0.00375463	0.0456958
NIP7	1.55621	1.15386	2.09886	0.00376011	0.0252067
ARMC2	1.84332	1.21879	2.78787	0.00376348	0.00317292
TMEM138	1.60821	1.16599	2.21814	0.00377922	0.0151094
IER3	1.16868	1.05167	1.29871	0.00378136	0.00087873
AKR7A3	0.893201	0.82746	0.964166	0.00378554	0.019779
MEN1	1.71714	1.1908	2.47612	0.00379121	0.00130212
NFKBIE	1.2883	1.08525	1.52934	0.00379358	0.00405824
ITGB5	1.39389	1.11316	1.74542	0.00380107	0.0328872
RAB29	1.36511	1.10562	1.68551	0.0038107	0.00239604
[truncated: 1,623 more rows]

## Sheet: Table S1_2
Table S1_2 Lists of mitophagy-related genes.
Gene names
Target
AMBRA1
ATF4
ATG5
ATG9A
ATG9B
BCL2L1
BCL2L13
BECN1
BECN2
BNIP3
BNIP3L
CALCOCO2
CITED2
CSNK2A1
CSNK2A2
CSNK2A3
CSNK2B
E2F1
EIF2AK3
FIS1
FOXO3
FUNDC1
GABARAP
GABARAPL1
GABARAPL2
HIF1A
HRAS
JUN
KRAS
MAPK10
MAPK8
MAPK9
MFN1
MFN2
MITF
MRAS
NBR1
NRAS
OPTN
PGAM5
PINK1
PRKN
RAB7A
RAB7B
RELA
RHOT1
RHOT2
RRAS
RRAS2
SP1
SQSTM1
SRC
TAX1BP1
TBC1D15
TBC1D17
TBK1
TFE3
TFEB
TOMM7
TP53
UBB
ULK1
USP15
USP30
USP8

## Sheet: Table S1_3
Table S1_3 HCC subtype identification of mitophage-related genes.
Cluster
TCGA-G3-AAV0-01,C1
TCGA-DD-AAE3-01,C1
TCGA-DD-A118-01,C2
TCGA-DD-A1EF-01,C2
TCGA-DD-A11D-01,C1
TCGA-G3-A6UC-01,C1
TCGA-WJ-A86L-01,C2
TCGA-CC-5263-01,C2
TCGA-DD-AAE6-01,C2
TCGA-K7-A6G5-01,C1
TCGA-DD-A1EL-01,C2
TCGA-G3-A7M6-01,C2
TCGA-DD-AAE4-01,C1
TCGA-MI-A75G-01,C1
TCGA-DD-AACQ-01,C2
TCGA-DD-AADV-01,C1
TCGA-LG-A9QD-01,C1
TCGA-G3-A25T-01,C2
TCGA-DD-AADB-01,C2
TCGA-UB-A7MA-01,C2
TCGA-DD-AAD0-01,C2
TCGA-BC-4072-01,C2
TCGA-DD-AACD-01,C1
TCGA-DD-AAE7-01,C1
TCGA-DD-AADJ-01,C1
TCGA-UB-A7MD-01,C2
TCGA-CC-5259-01,C1
TCGA-HP-A5MZ-01,C1
TCGA-DD-AACS-01,C2
TCGA-DD-A39X-01,C1
TCGA-DD-AAEE-01,C2
TCGA-2Y-A9GU-01,C1
TCGA-CC-A7IE-01,C2
TCGA-WX-AA44-01,C2
TCGA-G3-A7M8-01,C1
TCGA-ED-A7XP-01,C2
TCGA-BW-A5NQ-01,C2
TCGA-DD-A3A5-01,C1
TCGA-DD-AADM-01,C1
TCGA-FV-A3R3-01,C2
TCGA-DD-AACL-01,C2
TCGA-DD-A4NJ-01,C2
TCGA-DD-AADU-01,C1
TCGA-CC-A7IF-01,C1
TCGA-CC-A5UE-01,C2
TCGA-DD-AAVW-01,C1
TCGA-CC-A9FW-01,C2
TCGA-DD-A4NQ-01,C2
TCGA-DD-A3A7-01,C1
TCGA-EP-A2KA-01,C1
TCGA-ED-A7PZ-01,C1
TCGA-G3-A25U-01,C1
TCGA-RC-A7SH-01,C2
TCGA-G3-AAV1-01,C2
TCGA-2Y-A9GZ-01,C1
TCGA-DD-AA3A-01,C2
TCGA-2Y-A9HA-01,C2
TCGA-DD-AADK-01,C1
TCGA-G3-A5SI-01,C1
TCGA-DD-A4NI-01,C1
TCGA-DD-A73A-01,C1
TCGA-MR-A8JO-01,C2
TCGA-5R-AA1C-01,C2
TCGA-ZS-A9CG-01,C1
TCGA-DD-A4NH-01,C2
TCGA-FV-A4ZP-01,C1
TCGA-DD-AACJ-01,C1
TCGA-DD-AAVZ-01,C1
TCGA-DD-AAVR-01,C1
TCGA-RC-A7SB-01,C1
TCGA-3K-AAZ8-01,C1
TCGA-UB-A7MF-01,C1
TCGA-BC-A10R-01,C2
TCGA-ED-A459-01,C2
TCGA-ZP-A9D1-01,C1
TCGA-ZP-A9D0-01,C1
TCGA-CC-A7IK-01,C2
TCGA-WQ-AB4B-01,C1
TCGA-FV-A4ZQ-01,C2
TCGA-G3-A25S-01,C2
TCGA-NI-A4U2-01,C1
TCGA-RC-A7SK-01,C1
TCGA-DD-AADS-01,C1
TCGA-DD-A73F-01,C1
TCGA-DD-A11C-01,C1
TCGA-FV-A23B-01,C2
TCGA-DD-AADD-01,C2
TCGA-DD-AACO-01,C1
TCGA-RC-A6M3-01,C2
TCGA-DD-AAED-01,C1
TCGA-BC-A10X-01,C1
TCGA-CC-5260-01,C2
TCGA-DD-AAD3-01,C1
TCGA-G3-AAV7-01,C2
TCGA-DD-A39Y-01,C2
TCGA-K7-A5RG-01,C1
TCGA-G3-A25Y-01,C2
TCGA-DD-AACF-01,C1
TCGA-DD-A3A2-01,C1
TCGA-DD-A115-01,C1
TCGA-DD-A1EG-01,C2
TCGA-DD-AADO-01,C1
TCGA-5C-A9VH-01,C2
TCGA-BC-A10Q-01,C2
TCGA-BC-A110-01,C1
TCGA-DD-AAW3-01,C1
TCGA-2Y-A9H7-01,C1
TCGA-RC-A6M5-01,C1
TCGA-BC-A69H-01,C1
TCGA-CC-5258-01,C2
TCGA-BC-A69I-01,C1
TCGA-G3-A7M9-01,C2
TCGA-ED-A627-01,C1
TCGA-DD-AACC-01,C1
TCGA-DD-A4NB-01,C2
TCGA-ED-A66X-01,C2
TCGA-DD-A114-01,C2
TCGA-DD-A3A9-01,C1
TCGA-XR-A8TG-01,C2
TCGA-ES-A2HT-01,C1
TCGA-2Y-A9H3-01,C1
TCGA-2Y-A9HB-01,C1
TCGA-DD-A3A6-01,C1
TCGA-BW-A5NO-01,C1
TCGA-CC-A3MA-01,C2
TCGA-DD-AADC-01,C2
TCGA-CC-A7IL-01,C1
TCGA-DD-AACV-01,C1
TCGA-DD-AAD1-01,C2
TCGA-DD-AAVV-01,C2
TCGA-ED-A8O5-01,C2
TCGA-ED-A97K-01,C2
TCGA-2V-A95S-01,C2
TCGA-UB-A7MB-01,C2
TCGA-CC-5264-01,C2
TCGA-ED-A66Y-01,C2
TCGA-KR-A7K2-01,C1
TCGA-DD-AAEG-01,C1
TCGA-DD-AACG-01,C1
TCGA-CC-A123-01,C1
TCGA-DD-AAVQ-01,C1
TCGA-RC-A7S9-01,C1
TCGA-BC-A8YO-01,C2
TCGA-DD-A4NR-01,C2
TCGA-CC-A8HU-01,C2
TCGA-XR-A8TD-01,C2
TCGA-DD-A4NK-01,C1
TCGA-DD-A4ND-01,C2
TCGA-ZP-A9D2-01,C2
TCGA-DD-AADI-01,C1
TCGA-2Y-A9GX-01,C2
TCGA-DD-AACY-01,C1
TCGA-DD-AAW0-01,C1
TCGA-BC-A216-01,C2
TCGA-CC-A3MB-01,C2
TCGA-DD-A4NE-01,C2
TCGA-5R-AAAM-01,C1
TCGA-ZS-A9CF-01,C1
TCGA-RC-A6M6-01,C2
TCGA-DD-AACI-01,C1
TCGA-EP-A3JL-01,C1
TCGA-CC-A5UD-01,C2
TCGA-ES-A2HS-01,C1
TCGA-BC-A10U-01,C2
TCGA-DD-A119-01,C1
TCGA-2Y-A9H1-01,C1
TCGA-G3-A5SK-01,C1
TCGA-BC-A10Y-01,C2
TCGA-DD-AAE1-01,C1
TCGA-DD-AADN-01,C1
TCGA-CC-A3M9-01,C2
TCGA-DD-A73C-01,C1
TCGA-BW-A5NP-01,C2
TCGA-FV-A495-01,C1
TCGA-G3-AAV4-01,C2
TCGA-BC-A10W-01,C2
TCGA-DD-A1EK-01,C1
TCGA-DD-AAD6-01,C1
TCGA-G3-A3CH-01,C1
TCGA-CC-A8HS-01,C2
TCGA-DD-AAEA-01,C1
TCGA-DD-A1EE-01,C2
TCGA-FV-A3I1-01,C2
TCGA-G3-A5SJ-01,C2
TCGA-BC-A3KG-01,C2
TCGA-DD-AAVS-01,C2
TCGA-CC-A7IH-01,C1
TCGA-FV-A3I0-01,C2
TCGA-MI-A75H-01,C1
TCGA-CC-A9FV-01,C2
TCGA-BC-A217-01,C2
TCGA-DD-AAD5-01,C2
TCGA-2Y-A9H0-01,C2
TCGA-DD-AAD8-01,C1
TCGA-DD-A73D-01,C1
TCGA-DD-A1EI-01,C2
TCGA-K7-A5RF-01,C1
TCGA-DD-AACT-01,C1
TCGA-DD-A73B-01,C1
TCGA-DD-A4NO-01,C1
TCGA-2Y-A9H8-01,C1
TCGA-DD-A3A8-01,C1
TCGA-LG-A9QC-01,C2
TCGA-RC-A7SF-01,C1
TCGA-HP-A5N0-01,C1
TCGA-DD-A73E-01,C1
TCGA-G3-A5SL-01,C1
TCGA-2Y-A9H6-01,C1
TCGA-WX-AA47-01,C1
TCGA-MR-A520-01,C1
TCGA-DD-A3A1-01,C1
TCGA-DD-AADF-01,C1
TCGA-G3-A7M7-01,C1
TCGA-DD-AADQ-01,C1
TCGA-DD-AAVX-01,C1
TCGA-MI-A75E-01,C1
TCGA-GJ-A3OU-01,C2
TCGA-DD-A11B-01,C1
TCGA-LG-A6GG-01,C1
TCGA-CC-A7IJ-01,C2
TCGA-DD-AACA-01,C2
TCGA-DD-A39V-01,C1
TCGA-2Y-A9GS-01,C2
TCGA-DD-AACW-01,C2
TCGA-FV-A3R2-01,C2
TCGA-ZP-A9CY-01,C1
TCGA-NI-A8LF-01,C1
TCGA-DD-AAE2-01,C1
TCGA-5C-A9VG-01,C2
TCGA-KR-A7K8-01,C1
TCGA-ZP-A9CZ-01,C2
TCGA-EP-A12J-01,C1
TCGA-DD-A4NV-01,C1
TCGA-BC-A3KF-01,C1
TCGA-G3-A3CK-01,C1
TCGA-DD-A1EJ-01,C2
TCGA-DD-AACU-01,C2
TCGA-ZS-A9CE-01,C1
TCGA-2Y-A9H2-01,C2
TCGA-CC-5261-01,C2
TCGA-DD-AADA-01,C1
TCGA-G3-A25X-01,C1
TCGA-EP-A3RK-01,C2
TCGA-2Y-A9H5-01,C1
TCGA-G3-A3CG-01,C1
TCGA-BC-A112-01,C2
TCGA-ED-A4XI-01,C1
TCGA-2Y-A9GT-01,C1
TCGA-DD-AACX-01,C2
TCGA-DD-A1EB-01,C1
TCGA-DD-AACE-01,C1
TCGA-2Y-A9H9-01,C1
TCGA-CC-5262-01,C1
TCGA-G3-AAV2-01,C1
TCGA-DD-A4NN-01,C2
TCGA-DD-AACZ-01,C2
TCGA-DD-AAE0-01,C2
TCGA-YA-A8S7-01,C2
TCGA-2Y-A9GY-01,C2
TCGA-UB-A7ME-01,C1
TCGA-ED-A8O6-01,C2
TCGA-ZP-A9D4-01,C2
TCGA-DD-A1EH-01,C2
TCGA-DD-A11A-01,C1
TCGA-BC-A10Z-01,C2
TCGA-DD-AAEK-01,C1
TCGA-EP-A2KB-01,C1
TCGA-ED-A7PX-01,C2
TCGA-G3-A5SM-01,C1
TCGA-DD-AAEB-01,C1
TCGA-BC-A5W4-01,C1
TCGA-CC-A8HV-01,C2
TCGA-GJ-A9DB-01,C2
TCGA-BD-A3ER-01,C1
TCGA-ZP-A9CV-01,C1
TCGA-DD-AADY-01,C1
TCGA-MI-A75I-01,C2
TCGA-G3-A3CI-01,C1
TCGA-CC-A5UC-01,C2
TCGA-FV-A496-01,C1
TCGA-DD-AACK-01,C2
TCGA-XR-A8TE-01,C1
TCGA-DD-A3A4-01,C1
TCGA-RC-A6M4-01,C1
TCGA-ED-A7PY-01,C1
TCGA-DD-AADL-01,C2
TCGA-UB-A7MC-01,C2
TCGA-ED-A82E-01,C2
TCGA-UB-AA0U-01,C2
TCGA-CC-A9FU-01,C2
TCGA-DD-A113-01,C1
TCGA-KR-A7K0-01,C1
TCGA-DD-A4NL-01,C1
TCGA-DD-AADW-01,C2
TCGA-DD-A39Z-01,C1
TCGA-DD-AACB-01,C2
TCGA-DD-AADG-01,C1
TCGA-DD-AAW1-01,C1
TCGA-DD-AAC9-01,C1
TCGA-G3-A25Z-01,C1
TCGA-DD-A4NF-01,C1
TCGA-G3-A25V-01,C1
TCGA-G3-AAV5-01,C1
TCGA-BD-A2L6-01,C1
TCGA-XR-A8TF-01,C1
TCGA-DD-AACP-01,C2
TCGA-G3-A7M5-01,C1
TCGA-DD-A4NS-01,C2
TCGA-WX-AA46-01,C1
TCGA-O8-A75V-01,C1
TCGA-DD-AACH-01,C2
TCGA-BC-A10S-01,C1
TCGA-DD-AACN-01,C2
TCGA-DD-A1ED-01,C1
TCGA-CC-A9FS-01,C1
TCGA-T1-A6J8-01,C1
TCGA-DD-A73G-01,C1
TCGA-KR-A7K7-01,C1
TCGA-XR-A8TC-01,C1
TCGA-ZS-A9CD-01,C1
TCGA-2Y-A9GV-01,C1
TCGA-BC-A10T-01,C1
TCGA-DD-AAEI-01,C1
TCGA-FV-A2QQ-01,C1
TCGA-PD-A5DF-01,C2
TCGA-EP-A2KC-01,C1
TCGA-CC-A7IG-01,C2
TCGA-DD-A3A3-01,C1
TCGA-4R-AA8I-01,C2
TCGA-G3-AAV3-01,C1
TCGA-G3-A3CJ-01,C1
TCGA-DD-A4NG-01,C2
TCGA-DD-A4NP-01,C1
TCGA-5R-AA1D-01,C1
TCGA-ED-A5KG-01,C2
TCGA-DD-AAW2-01,C1
TCGA-2Y-A9GW-01,C1
TCGA-DD-A116-01,C1
TCGA-CC-A1HT-01,C2
TCGA-DD-AAC8-01,C2
TCGA-G3-AAUZ-01,C1
TCGA-DD-AAD2-01,C1
TCGA-BD-A3EP-01,C2
TCGA-DD-AADR-01,C1
TCGA-DD-AAVU-01,C1
TCGA-QA-A7B7-01,C2
TCGA-DD-AADP-01,C1
TCGA-2Y-A9H4-01,C1
TCGA-DD-A1EA-01,C2
TCGA-CC-A3MC-01,C2
TCGA-FV-A2QR-01,C2
TCGA-EP-A26S-01,C1
TCGA-K7-AAU7-01,C2
TCGA-G3-AAV6-01,C2
TCGA-CC-A8HT-01,C2
TCGA-RG-A7D4-01,C2
TCGA-DD-AAE9-01,C2
TCGA-ED-A7XO-01,C1
TCGA-DD-AAVP-01,C1
TCGA-MI-A75C-01,C1
TCGA-DD-A39W-01,C1
TCGA-DD-A4NA-01,C2
TCGA-DD-AAVY-01,C1
TCGA-DD-A1EC-01,C2
TCGA-5C-AAPD-01,C1
TCGA-BC-4073-01,C2
TCGA-WQ-A9G7-01,C2
TCGA-CC-A7II-01,C2
TCGA-DD-AAEH-01,C1
TCGA-GJ-A6C0-01,C2
TCGA-UB-AA0V-01,C1

## Sheet: Table S1_4
Table S1_4 Clinical information of HCC subtypes.
HCC patients	Age	Sex	Race	T	N	M	Stage	Grade	newTumor	Smoking	Radiation	Neoadjuvant	Therapy	OS	OS.time	DSS	DSS.time	DFI	DFI.time	PFI	PFI.time	HBCV	Groups
TCGA-G3-AAV0	58	MALE	ASIAN	T1	N0	M0	I	G2	NA	NA	NO	No	NA	0	476	0	476	0	476	0	476	HCV;HBV	C1
TCGA-DD-AAE3	50	MALE	ASIAN	T1	N0	M0	I	G2	NA	NA	NO	No	NA	0	566	0	566	0	566	0	566	Unknown	C1
TCGA-DD-A11D	57	FEMALE	WHITE	T1	N0	M0	I	G2	Recurrence	NA	NA	No	Chemotherapy	1	1560	1	1560	1	498	1	498	Unknown	C1
TCGA-G3-A6UC	65	MALE	WHITE	T3	N0	M0	III	G2	Recurrence	NA	NO	No	NA	0	671	0	671	1	639	1	639	HCV;HBV	C1
TCGA-K7-A6G5	66	MALE	WHITE	T1	N0	NA	I	G2	NA	NA	NO	No	NA	0	512	0	512	NA	NA	0	512	HCV	C1
TCGA-DD-AAE4	49	FEMALE	ASIAN	T1	N0	M0	I	G1	Recurrence	NA	NO	No	NA	0	608	0	608	1	111	1	111	Unknown	C1
TCGA-MI-A75G	63	MALE	WHITE	T2	N0	M0	II	G2	NA	NA	NO	No	NA	0	698	0	698	0	698	0	698	HCV	C1
TCGA-DD-AADV	50	MALE	ASIAN	T1	N0	M0	I	G3	NA	NA	NO	No	NA	0	574	0	574	0	574	0	574	Unknown	C1
TCGA-LG-A9QD	68	MALE	WHITE	T3	N0	M0	III	G2	NA	NA	NO	No	Chemotherapy	0	366	0	366	0	366	0	366	Not Available	C1
TCGA-DD-AACD	48	MALE	ASIAN	T1	N0	M0	I	G4	Recurrence	NA	NO	No	NA	1	381	1	381	1	151	1	151	Unknown	C1
TCGA-DD-AAE7	72	MALE	ASIAN	T1	N0	M0	I	G2	NA	NA	NO	No	NA	0	644	0	644	0	644	0	644	Unknown	C1
TCGA-DD-AADJ	70	FEMALE	ASIAN	T1	N0	M0	I	G3	NA	NA	NO	No	NA	0	1066	0	1066	0	1066	0	1066	Unknown	C1
TCGA-CC-5259	60	FEMALE	ASIAN	T4	N0	M0	III	G2	Recurrence	NA	NA	No	NA	0	250	0	250	1	180	1	180	HCV;HBV	C1
TCGA-HP-A5MZ	78	MALE	NA	T1	NA	M0	I	G2	NA	NA	NO	No	NA	1	91	0	91	0	91	0	91	HCV;HBV	C1
TCGA-DD-A39X	78	FEMALE	WHITE	T1	NA	M0	I	G2	Recurrence	NA	NA	No	NA	1	1694	1	1694	1	1032	1	1032	HBV	C1
TCGA-2Y-A9GU	55	FEMALE	WHITE	T1	NA	NA	I	G2	NA	NA	NO	No	NA	0	1939	0	1939	0	1939	0	1939	HCV;HBV	C1
TCGA-G3-A7M8	31	MALE	ASIAN	T1	NA	NA	I	G1	NA	NA	NO	No	NA	0	430	0	430	NA	NA	0	430	HCV;HBV	C1
TCGA-DD-A3A5	66	FEMALE	WHITE	T3	N0	M0	III	G2	Recurrence	NA	NA	No	NA	1	3125	1	3125	1	84	1	84	Unknown	C1
TCGA-DD-AADM	58	MALE	ASIAN	T2	N0	M0	II	G3	NA	NA	NO	No	NA	1	12	0	12	0	12	0	12	Unknown	C1
TCGA-DD-AADU	60	MALE	ASIAN	T2	N0	M0	II	G3	NA	NA	NO	No	NA	0	554	0	554	0	554	0	554	Unknown	C1
TCGA-CC-A7IF	59	MALE	ASIAN	T3	N0	M0	III	G1	Primary	NA	NA	No	NA	1	649	1	649	0	649	1	254	HCV;HBV	C1
TCGA-DD-AAVW	35	MALE	ASIAN	T1	N0	M0	I	G2	NA	NA	NO	No	NA	0	2317	0	2317	0	2317	0	2317	Unknown	C1
TCGA-DD-A3A7	67	MALE	NA	T3	N0	M0	III	G3	Recurrence	NA	NO	No	Chemotherapy	1	419	1	419	1	144	1	144	HBV	C1
TCGA-EP-A2KA	52	FEMALE	WHITE	T3	NA	NA	III	G3	Recurrence	NA	NA	No	Targeted Molecular therapy	1	627	1	627	1	293	1	293	Not Available	C1
TCGA-ED-A7PZ	61	MALE	ASIAN	T2	NA	M0	II	G2	NA	NA	NO	No	NA	0	6	0	6	0	6	0	6	HBV	C1
TCGA-G3-A25U	63	FEMALE	ASIAN	T1	N0	M0	I	G3	NA	NA	NA	No	NA	0	1636	0	1636	0	1636	0	1636	Not Available	C1
TCGA-2Y-A9GZ	82	FEMALE	WHITE	T2	NA	NA	II	G2	Recurrence	NA	NO	No	Chemotherapy	1	848	1	848	1	719	1	719	HCV;HBV	C1
TCGA-DD-AADK	68	FEMALE	ASIAN	T2	N0	M0	II	G3	NA	NA	NO	No	NA	0	1049	0	1049	0	1049	0	1049	Unknown	C1
TCGA-G3-A5SI	44	MALE	ASIAN	T2	N0	M0	II	G2	Recurrence	NA	NO	No	Chemotherapy	1	768	1	768	1	348	1	348	Not Available	C1
TCGA-DD-A4NI	67	MALE	WHITE	T2	NA	M0	II	G2	NA	NA	NO	No	NA	0	816	0	816	0	816	0	816	HBV	C1
TCGA-DD-A73A	71	MALE	WHITE	T1	N0	M0	I	G2	NA	NA	NO	No	NA	0	728	0	728	0	728	0	728	HBV	C1
TCGA-ZS-A9CG	55	MALE	WHITE	T2	NA	NA	II	G2	NA	NA	NO	No	NA	0	341	0	341	0	341	0	341	HCV;HBV	C1
TCGA-FV-A4ZP	78	MALE	WHITE	T3	NA	M0	III	G2	NA	NA	NA	No	NA	1	2486	0	2486	NA	NA	0	2486	Not Available	C1
TCGA-DD-AACJ	75	MALE	ASIAN	T2	N0	M0	II	G2	Recurrence	NA	NO	No	NA	0	2102	0	2102	1	100	1	100	Unknown	C1
TCGA-DD-AAVZ	38	MALE	ASIAN	T1	N0	M0	I	G2	NA	NA	NO	No	NA	0	1900	0	1900	0	1900	0	1900	Unknown	C1
TCGA-DD-AAVR	44	MALE	ASIAN	T1	N0	M0	I	G2	NA	NA	NO	No	NA	0	2513	0	2513	0	2513	0	2513	Unknown	C1
TCGA-RC-A7SB	53	MALE	ASIAN	T2	N0	M0	II	G2	NA	NA	NO	No	NA	0	588	0	588	0	588	0	588	Not Available	C1
TCGA-3K-AAZ8	65	MALE	BLACK	T3	NA	NA	III	G1	Recurrence	NA	NO	No	NA	0	396	0	396	NA	NA	1	151	Unknown	C1
TCGA-UB-A7MF	56	MALE	WHITE	T3	NA	NA	III	G2	Recurrence	NA	NO	No	NA	1	214	1	214	1	133	1	133	HCV;HBV	C1
TCGA-ZP-A9D1	56	FEMALE	WHITE	T1	NA	NA		G2	NA	NA	NO	No	NA	0	21	0	21	0	21	0	21	Unknown	C1
TCGA-ZP-A9D0	67	FEMALE	BLACK	T1	NA	NA		G1	NA	NA	NO	No	NA	0	1091	0	1091	0	1091	0	1091	Unknown	C1
TCGA-WQ-AB4B	62	MALE	WHITE	T2	NA	M0	II	G2	Recurrence	NA	NO	No	NA	0	395	0	395	1	273	1	273	Unknown	C1
TCGA-NI-A4U2	71	MALE	WHITE	T3	NA	NA	III	G1	Recurrence	NA	NO	No	NA	1	1791	1	1791	1	106	1	106	Unknown	C1
TCGA-RC-A7SK	59	MALE	ASIAN	T1	N0	M0	I	G3	Recurrence	NA	NO	No	NA	0	472	0	472	1	312	1	312	Not Available	C1
TCGA-DD-AADS	63	MALE	ASIAN	T1	N0	M0	I	G2	NA	NA	NO	No	NA	0	474	0	474	0	474	0	474	Unknown	C1
TCGA-DD-A73F	77	FEMALE	WHITE	T1	N0	M0	I	G1	NA	NA	NO	No	NA	0	1085	0	1085	0	1085	0	1085	Unknown	C1
TCGA-DD-A11C	69	MALE	WHITE	T1	N0	M0	I	G3	NA	NA	NA	No	NA	0	662	0	662	NA	NA	0	662	HBV	C1
TCGA-DD-AACO	40	MALE	ASIAN	T1	N0	M0	I	G3	Recurrence	NA	NO	No	NA	0	1876	0	1876	1	479	1	479	Unknown	C1
TCGA-DD-AAED	51	MALE	ASIAN	T1	N0	M0	I	G3	Recurrence	NA	NO	No	NA	0	763	0	763	1	198	1	198	Unknown	C1
TCGA-BC-A10X	52	FEMALE	WHITE	T3	N0	NA	III	G2	NA	NA	NA	No	NA	1	770	0	770	0	770	0	770	Not Available	C1
TCGA-DD-AAD3	43	MALE	ASIAN	T1	N0	M0	I	G2	NA	NA	NO	No	NA	0	1295	0	1295	0	1295	0	1295	Unknown	C1
TCGA-K7-A5RG	66	MALE	BLACK	T1	NA	NA	I	G1	NA	NA	NO	No	NA	0	519	0	519	0	519	0	519	HCV	C1
TCGA-DD-AACF	68	MALE	ASIAN	T1	N0	M0	I	G3	Recurrence	NA	NO	No	NA	1	365	1	365	1	119	1	119	Unknown	C1
TCGA-DD-A3A2	76	FEMALE	WHITE	T1	N0	M0	I	G1	NA	NA	NA	No	NA	1	2131	0	2131	0	2131	0	2131	Unknown	C1
TCGA-DD-A115	53	MALE	WHITE	T3	N0	M0	III	G2	Recurrence	NA	NA	No	Chemotherapy	1	2542	1	2542	1	469	1	469	HBV	C1
TCGA-DD-AADO	55	MALE	ASIAN	T1	N0	M0	I	G3	NA	NA	NO	No	NA	0	453	0	453	0	453	0	453	Unknown	C1
TCGA-BC-A110	51	FEMALE	BLACK	T1	NA	NA		G1	Recurrence	NA	NA	No	NA	1	2116	1	2116	1	2057	1	2057	Not Available	C1
TCGA-DD-AAW3	69	MALE	ASIAN	T1	N0	M0	I	G2	NA	NA	NO	No	NA	0	1633	0	1633	0	1633	0	1633	Unknown	C1
TCGA-2Y-A9H7	81	FEMALE	WHITE	T1	N0	NA	I	G2	Recurrence	NA	NO	No	NA	0	1168	0	1168	1	1117	1	1117	HCV;HBV	C1
TCGA-RC-A6M5	20	FEMALE	WHITE	T1	N1	M0	IV	G2	NA	NA	NA	No	NA	0	15	0	15	NA	NA	0	15	Not Available	C1
TCGA-BC-A69H	64	MALE	WHITE	T2	NA	M0	II	G3	NA	NA	NO	No	NA	0	444	0	444	0	444	0	444	Not Available	C1
TCGA-BC-A69I	69	MALE	WHITE	T1	N0	M0	I	G1	NA	NA	NO	No	NA	0	387	0	387	0	387	0	387	Not Available	C1
TCGA-ED-A627	74	MALE	WHITE	T1	NA	M0	I	G2	NA	NA	NA	No	NA	0	423	0	423	0	423	0	423	HCV;HBV	C1
TCGA-DD-AACC	61	MALE	ASIAN	T1	N0	M0	I	G2	Recurrence	NA	NO	No	NA	1	1685	1	1685	1	537	1	537	Unknown	C1
TCGA-DD-A3A9	64	FEMALE	WHITE	T4	N0	M1	IV	G2	Recurrence	NA	NA	No	NA	1	931	1	931	NA	NA	1	289	Unknown	C1
TCGA-ES-A2HT	54	MALE	BLACK	T1	NA	NA	I	G2	NA	NA	NA	No	NA	1	438	0	438	0	438	0	438	Not Available	C1
TCGA-2Y-A9H3	45	MALE	WHITE	T2	NA	NA	II	G1	Recurrence	NA	NO	No	NA	0	1516	0	1516	1	22	1	22	HCV;HBV	C1
TCGA-2Y-A9HB	66	MALE	NA	T1	NA	NA	I	G2	NA	NA	NO	No	NA	0	260	0	260	0	260	0	260	HCV	C1
TCGA-DD-A3A6	72	FEMALE	WHITE	T2	N0	M0	II	G2	NA	NA	NA	No	NA	1	3258	0	3258	0	3258	0	3258	HBV	C1
TCGA-BW-A5NO	50	MALE	BLACK	T3	NA	NA	III	G2	NA	NA	NO	No	NA	0	20	0	20	NA	NA	0	20	Not Available	C1
TCGA-CC-A7IL	61	MALE	ASIAN	T3	N0	M0	III	G1	Recurrence	NA	NA	No	NA	1	278	1	278	1	179	1	179	HCV;HBV	C1
TCGA-DD-AACV	53	MALE	ASIAN	T1	N0	M0	I	G3	Recurrence	NA	NO	No	NA	0	1531	0	1531	1	344	1	344	Unknown	C1
TCGA-KR-A7K2	64	MALE	WHITE	T1	N0	M0	I	G1	NA	NA	NO	No	NA	0	829	0	829	0	829	0	829	HCV	C1
TCGA-DD-AAEG	59	FEMALE	ASIAN	T1	N0	M0	I	G3	NA	NA	NO	No	NA	0	719	0	719	0	719	0	719	Unknown	C1
TCGA-DD-AACG	52	MALE	ASIAN	T2	N0	M0	II	G4	Recurrence	NA	NO	No	NA	1	469	1	469	1	125	1	125	Unknown	C1
TCGA-CC-A123	24	FEMALE	ASIAN	T3	N0	M0	III	G1	Primary	NA	NA	No	NA	0	219	0	219	NA	NA	1	145	HCV;HBV	C1
TCGA-DD-AAVQ	38	MALE	ASIAN	T1	N0	M0	I	G2	Recurrence	NA	NO	No	NA	0	2728	0	2728	1	1509	1	1509	Unknown	C1
TCGA-RC-A7S9	47	FEMALE	ASIAN	T1	N0	M0	I	G3	NA	NA	NO	No	NA	0	640	0	640	0	640	0	640	Not Available	C1
TCGA-DD-A4NK	80	FEMALE	WHITE	T3	N0	M0	III	G2	Recurrence	NA	NO	No	NA	1	1210	1	1210	1	89	1	89	HBV	C1
TCGA-DD-AADI	43	FEMALE	ASIAN	T1	N0	M0	I	G3	NA	NA	NO	No	NA	0	1085	0	1085	0	1085	0	1085	Unknown	C1
TCGA-DD-AACY	61	MALE	ASIAN	T1	N0	M0	I	G3	Recurrence	NA	NO	No	NA	0	1450	0	1450	1	776	1	776	Unknown	C1
TCGA-DD-AAW0	54	MALE	ASIAN	T1	N0	M0	I	G2	NA	NA	NO	No	NA	0	2015	0	2015	0	2015	0	2015	Unknown	C1
TCGA-5R-AAAM	65	FEMALE	WHITE	T2	N0	M0	II	G2	NA	NA	NO	No	NA	1	46	0	46	0	46	0	46	HCV;HBV	C1
TCGA-ZS-A9CF	64	MALE	WHITE	T2	NA	NA	II	G2	Recurrence	NA	NO	No	NA	0	2412	0	2412	1	636	1	636	HCV;HBV	C1
TCGA-DD-AACI	69	MALE	ASIAN	T2	N0	M0	II	G3	Recurrence	NA	NO	No	NA	0	1618	0	1618	1	1432	1	1432	Unknown	C1
TCGA-EP-A3JL	76	MALE	WHITE	T1	NA	NA	I	G2	NA	NA	NA	No	NA	0	303	0	303	NA	NA	0	303	Not Available	C1
TCGA-ES-A2HS	80	MALE	WHITE	T1	NA	NA	I	G2	NA	NA	NA	No	NA	1	688	0	688	0	688	0	688	Not Available	C1
TCGA-DD-A119	40	MALE	ASIAN	T3	N0	M1	IV	G3	NA	NA	NA	No	NA	1	223	NA	223	NA	NA	0	223	HBV	C1
TCGA-2Y-A9H1	58	MALE	WHITE	T1	NA	NA	I	G2	Recurrence	NA	NO	No	NA	1	1229	1	1229	1	321	1	321	HCV	C1
TCGA-G3-A5SK	58	MALE	WHITE	T1	NA	M0	I	G1	Recurrence	NA	NO	No	NA	0	744	0	744	1	483	1	483	Not Available	C1
TCGA-DD-AAE1	52	MALE	ASIAN	T1	N0	M0	I	G3	NA	NA	NO	No	NA	0	552	0	552	0	552	0	552	Unknown	C1
TCGA-DD-AADN	59	MALE	ASIAN	T1	NA	NA	I	G4	NA	NA	NO	No	NA	0	898	0	898	0	898	0	898	Unknown	C1
TCGA-DD-A73C	65	FEMALE	WHITE	T3	N0	M0	III	G1	Recurrence	NA	NO	No	NA	0	701	0	701	1	566	1	566	HBV	C1
TCGA-FV-A495	51	FEMALE	WHITE	T2	NA	M0	II	G2	NA	NA	NA	No	NA	0	1	0	1	0	1	0	1	Not Available	C1
TCGA-DD-A1EK	64	FEMALE	WHITE	T4	N0	M1	IV	G2	Recurrence	NA	NO	No	Chemotherapy	1	558	1	558	NA	NA	1	167	HBV	C1
TCGA-DD-AAD6	66	MALE	ASIAN	T3	N0	M0	III	G3	Recurrence	NA	NO	No	NA	0	672	0	672	1	50	1	50	Unknown	C1
TCGA-G3-A3CH	53	MALE	ASIAN	T3	N0	M0	III	G2	Recurrence	NA	NA	No	Chemotherapy	0	780	0	780	1	116	1	116	Not Available	C1
TCGA-DD-AAEA	65	MALE	ASIAN	T1	N0	M0	I	G3	NA	NA	NO	No	NA	0	575	0	575	0	575	0	575	Unknown	C1
TCGA-CC-A7IH	58	MALE	ASIAN	T3	N0	M0	III	G1	NA	NA	NA	No	NA	0	365	0	365	0	365	0	365	HCV;HBV	C1
TCGA-MI-A75H	77	MALE	WHITE	NA	NA	NA		NA	Recurrence	NA	NO	No	NA	0	747	0	747	1	301	1	301	HCV	C1
TCGA-DD-AAD8	73	FEMALE	ASIAN	T1	N0	M0	I	G2	NA	NA	NO	No	NA	0	1219	0	1219	0	1219	0	1219	Unknown	C1
TCGA-DD-A73D	68	FEMALE	WHITE	T2	NA	NA	II	G1	Recurrence	NA	NO	No	NA	0	693	0	693	1	592	1	592	HCV;HBV	C1
TCGA-K7-A5RF	64	MALE	WHITE	T1	NA	NA	I	G1	Recurrence	NA	NO	No	NA	0	631	0	631	1	205	1	205	HCV	C1
TCGA-DD-AACT	69	FEMALE	ASIAN	T1	N0	M0	I	G2	NA	NA	NO	No	NA	0	1562	0	1562	0	1562	0	1562	Unknown	C1
TCGA-DD-A73B	72	FEMALE	WHITE	T1	N0	M0	I	G2	Recurrence	NA	NO	No	NA	1	283	1	283	1	240	1	240	HBV	C1
TCGA-DD-A4NO	65	MALE	WHITE	T1	N0	M0	I	G1	Recurrence	NA	NO	No	NA	0	2245	0	2245	1	990	1	990	HCV;HBV	C1
TCGA-2Y-A9H8	85	FEMALE	WHITE	T1	NA	NA		G2	Recurrence	NA	NO	No	NA	1	633	1	633	1	398	1	398	HCV;HBV	C1
TCGA-DD-A3A8	75	MALE	WHITE	T2	N0	M0	II	G2	NA	NA	NA	No	NA	1	11	0	11	0	11	0	11	HBV	C1
TCGA-RC-A7SF	66	MALE	ASIAN	T1	N0	M0	I	G2	Recurrence	NA	NO	No	NA	0	579	0	579	1	502	1	502	Not Available	C1
TCGA-HP-A5N0	90	FEMALE	NA	NA	NA	M0		NA	Recurrence	NA	NO	No	NA	1	1147	1	1147	1	179	1	179	Unknown	C1
TCGA-DD-A73E	66	MALE	WHITE	T1	N0	M0	I	G1	NA	NA	NO	No	NA	0	44	0	44	0	44	0	44	HBV	C1
TCGA-G3-A5SL	70	MALE	WHITE	T2	NA	M0	II	G2	NA	NA	NO	No	NA	0	621	0	621	0	621	0	621	Not Available	C1
TCGA-2Y-A9H6	68	FEMALE	WHITE	T1	NA	NA	I	G2	NA	NA	NO	No	NA	0	357	0	357	0	357	0	357	Unknown	C1
TCGA-WX-AA47	33	FEMALE	WHITE	T3	NA	NA	III	G2	Recurrence	NA	YES	No	Chemotherapy	1	556	1	556	1	103	1	103	HCV	C1
TCGA-MR-A520	58	MALE	WHITE	T1	NA	NA	I	G1	NA	NA	NA	No	NA	0	229	0	229	NA	NA	0	229	HCV;HBV	C1
TCGA-DD-A3A1	65	MALE	NA	T3	N0	M0	III	G2	NA	NA	NA	No	NA	1	233	0	233	0	233	0	233	Unknown	C1
TCGA-DD-AADF	64	FEMALE	ASIAN	T1	N0	M0	I	G4	NA	NA	NO	No	NA	1	115	0	115	0	115	0	115	Unknown	C1
TCGA-G3-A7M7	65	MALE	WHITE	T1	NA	NA	I	G1	NA	NA	NO	No	NA	0	361	0	361	0	361	0	361	HCV;HBV	C1
TCGA-DD-AADQ	59	MALE	ASIAN	T2	N0	M0	II	G3	NA	NA	NO	No	NA	0	436	0	436	0	436	0	436	Unknown	C1
TCGA-DD-AAVX	38	MALE	ASIAN	T2	N0	M0	II	G2	Recurrence	NA	NO	No	NA	0	1718	0	1718	1	393	1	393	Unknown	C1
TCGA-MI-A75E	61	MALE	WHITE	T4	N0	M0	III	G2	NA	NA	NO	No	NA	0	507	0	507	0	507	0	507	HCV	C1
TCGA-DD-A11B	73	MALE	WHITE	T1	N0	M0	I	G2	NA	NA	NA	No	NA	1	14	0	14	NA	NA	0	14	HBV	C1
TCGA-LG-A6GG	79	FEMALE	WHITE	T2	NA	M0	II	G2	NA	NA	NO	No	NA	0	387	0	387	0	387	0	387	Not Available	C1
TCGA-DD-A39V	77	MALE	WHITE	T2	NA	M0	II	G3	Recurrence	NA	NA	No	NA	1	643	1	643	1	455	1	455	Not Available	C1
TCGA-ZP-A9CY	66	FEMALE	WHITE	T1	NA	NA		G1	NA	NA	NO	No	NA	0	782	0	782	0	782	0	782	Unknown	C1
TCGA-NI-A8LF	74	MALE	WHITE	T1	NA	NA	I	G3	NA	NA	NO	No	NA	0	799	0	799	0	799	0	799	Unknown	C1
TCGA-DD-AAE2	51	MALE	ASIAN	T1	N0	M0	I	G3	NA	NA	NO	No	NA	0	638	0	638	0	638	0	638	Unknown	C1
TCGA-KR-A7K8	57	MALE	NA	T1	N0	M0	I	G1	NA	NA	NO	No	NA	0	906	0	906	0	906	0	906	Unknown	C1
TCGA-EP-A12J	62	MALE	BLACK	T1	NA	NA	I	G1	NA	NA	NA	No	NA	0	570	0	570	0	570	0	570	Not Available	C1
TCGA-DD-A4NV	61	MALE	WHITE	T3	N0	M0	III	G1	NA	NA	NO	No	NA	0	2398	0	2398	0	2398	0	2398	HBV	C1
TCGA-BC-A3KF	66	FEMALE	WHITE	T1	NA	M0	I	G2	NA	NA	NA	No	NA	0	8	0	8	0	8	0	8	Not Available	C1
TCGA-G3-A3CK	61	MALE	ASIAN	T1	N0	M0	I	G2	NA	NA	NA	No	NA	0	585	0	585	0	585	0	585	Not Available	C1
TCGA-ZS-A9CE	79	FEMALE	WHITE	T2	NA	NA	II	G1	Primary	NA	NO	No	NA	0	1241	0	1241	0	1241	1	892	HCV;HBV	C1
TCGA-DD-AADA	66	FEMALE	ASIAN	T1	N0	M0	I	G3	NA	NA	NO	No	NA	0	1233	0	1233	0	1233	0	1233	Unknown	C1
TCGA-G3-A25X	73	MALE	ASIAN	T2	N0	M0	II	G3	NA	NA	NA	No	NA	0	1779	0	1779	0	1779	0	1779	Not Available	C1
TCGA-2Y-A9H5	59	FEMALE	WHITE	T1	N0	NA	I	G3	Recurrence	NA	NO	No	NA	1	555	1	555	1	258	1	258	HCV	C1
TCGA-G3-A3CG	80	MALE	WHITE	T1	N0	M0	I	G2	Recurrence	NA	NA	Yes	Targeted Molecular therapy	0	673	0	673	NA	NA	1	329	Not Available	C1
TCGA-ED-A4XI	58	MALE	ASIAN	T2	N0	M0	II	G3	NA	NA	NO	No	NA	0	819	0	819	0	819	0	819	HBV	C1
TCGA-2Y-A9GT	51	MALE	WHITE	T1	NA	NA	I	G2	Recurrence	NA	NO	No	NA	1	1624	1	1624	1	1083	1	1083	HCV;HBV	C1
TCGA-DD-A1EB	72	FEMALE	NA	T1	N0	M0	I	G2	Recurrence	NA	NA	No	NA	0	2017	0	2017	1	505	1	505	HBV	C1
TCGA-DD-AACE	62	MALE	ASIAN	T1	N0	M0	I	G3	Recurrence	NA	NO	No	NA	0	2184	0	2184	1	1279	1	1279	Unknown	C1
TCGA-2Y-A9H9	70	MALE	WHITE	T1	N0	NA	I	G2	Recurrence	NA	NO	No	Chemotherapy	0	697	0	697	1	59	1	59	Unknown	C1
TCGA-CC-5262	67	MALE	ASIAN	T4	N0	M0	III	G1	NA	NA	NA	No	NA	1	103	0	103	NA	NA	0	103	HCV;HBV	C1
TCGA-G3-AAV2	50	MALE	WHITE	T1	N0	M0	I	G1	NA	NA	NO	No	NA	0	372	0	372	0	372	0	372	HCV;HBV	C1
TCGA-UB-A7ME	51	MALE	ASIAN	T1	NA	NA	I	G2	NA	NA	NO	No	NA	0	486	0	486	0	486	0	486	HBV	C1
TCGA-DD-A11A	67	MALE	BLACK	T1	N0	M0	I	G3	NA	NA	NA	No	NA	0	79	0	79	0	79	0	79	HBV	C1
TCGA-DD-AAEK	51	MALE	ASIAN	T2	N0	M0	II	G3	NA	NA	NO	No	NA	0	1067	0	1067	0	1067	0	1067	Unknown	C1
TCGA-EP-A2KB	46	FEMALE	WHITE	T1	NA	NA	I	G2	Recurrence	NA	NA	No	NA	1	596	1	596	1	161	1	161	Not Available	C1
TCGA-G3-A5SM	58	MALE	WHITE	T2	NA	M0	II	G3	Recurrence	NA	NO	No	NA	0	520	0	520	1	252	1	252	Not Available	C1
TCGA-DD-AAEB	60	MALE	ASIAN	T1	N0	M0	I	G2	NA	NA	NO	No	NA	0	478	0	478	0	478	0	478	Unknown	C1
TCGA-BC-A5W4	69	MALE	WHITE	T3	NA	M0	III	G3	Recurrence	NA	NO	No	NA	1	547	0	547	NA	NA	1	384	Not Available	C1
TCGA-BD-A3ER	62	MALE	WHITE	T2	NA	NA	II	G2	Recurrence	NA	NA	No	NA	0	1115	0	1115	1	226	1	226	HBV	C1
TCGA-ZP-A9CV	59	MALE	WHITE	T1	NA	NA		G1	NA	NA	NO	No	NA	1	1088	1	1088	NA	NA	1	1088	Unknown	C1
TCGA-DD-AADY	55	FEMALE	ASIAN	T1	N0	M0	I	G2	NA	NA	NO	No	NA	0	555	0	555	0	555	0	555	Unknown	C1
TCGA-G3-A3CI	71	MALE	WHITE	T1	N0	M0	I	G2	NA	NA	NA	No	NA	0	180	0	180	0	180	0	180	Not Available	C1
TCGA-FV-A496	84	FEMALE	WHITE	T1	NA	M0	I	G2	NA	NA	NA	No	NA	0	10	0	10	0	10	0	10	Not Available	C1
TCGA-XR-A8TE	16	MALE	WHITE	T3	N0	NA	III	G1	Recurrence	NA	NO	No	NA	0	925	0	925	1	210	1	210	Not Available	C1
TCGA-DD-A3A4	37	MALE	WHITE	T3	N0	M0	III	G3	Recurrence	NA	NA	No	Chemotherapy	1	612	1	612	1	87	1	87	Not Available	C1
TCGA-RC-A6M4	74	FEMALE	WHITE	T3	NA	NA	III	G2	NA	NA	NA	No	NA	0	22	0	22	NA	NA	0	22	Not Available	C1
TCGA-ED-A7PY	20	FEMALE	ASIAN	T2	NA	M0	II	G3	NA	NA	NO	No	NA	0	390	0	390	0	390	0	390	HBV	C1
TCGA-DD-A113	55	FEMALE	WHITE	T2	N0	M0	II	G3	Recurrence	NA	NA	No	NA	0	2425	0	2425	1	1676	1	1676	HBV	C1
TCGA-KR-A7K0	65	MALE	WHITE	T1	N0	M0	I	G1	NA	NA	NO	No	NA	1	65	0	65	0	65	0	65	HCV	C1
TCGA-DD-A4NL	46	MALE	WHITE	T1	N0	M0	I	G1	NA	NA	NO	No	NA	0	1711	0	1711	0	1711	0	1711	HBV	C1
TCGA-DD-A39Z	43	FEMALE	NA	T2	NA	M0	II	G2	NA	NA	NA	No	NA	1	601	0	601	0	601	0	601	Unknown	C1
TCGA-DD-AADG	70	MALE	ASIAN	T3	N0	M0	III	G3	Recurrence	NA	NO	No	NA	0	1145	0	1145	1	270	1	270	Unknown	C1
TCGA-DD-AAW1	55	MALE	ASIAN	T3	N0	M0	III	G2	NA	NA	NO	No	NA	0	1989	0	1989	0	1989	0	1989	Unknown	C1
TCGA-DD-AAC9	51	MALE	ASIAN	T1	N0	M0	I	G2	NA	NA	NO	No	NA	0	347	0	347	0	347	0	347	Unknown	C1
TCGA-G3-A25Z	58	MALE	ASIAN	T1	N0	M0	I	G2	NA	NA	NA	No	NA	0	655	0	655	0	655	0	655	Not Available	C1
TCGA-DD-A4NF	72	MALE	WHITE	T1	N0	M0	I	G2	Recurrence	NA	NO	No	NA	0	942	0	942	1	656	1	656	HCV;HBV	C1
TCGA-G3-A25V	68	MALE	WHITE	T1	N0	M0	I	G2	Recurrence	NA	NA	No	NA	0	860	0	860	1	489	1	489	Not Available	C1
TCGA-G3-AAV5	67	MALE	WHITE	T2	N0	M0	II	G2	Recurrence	NA	YES	No	Chemotherapy	0	354	0	354	1	117	1	117	HCV;HBV	C1
TCGA-BD-A2L6	69	MALE	WHITE	T2	NA	NA		G2	Recurrence	NA	NA	No	NA	0	1363	0	1363	1	415	1	415	HBV	C1
TCGA-XR-A8TF	74	MALE	WHITE	T1	NA	NA	I	G1	Recurrence	NA	NO	No	NA	1	693	0	693	1	231	1	231	Not Available	C1
TCGA-G3-A7M5	76	MALE	ASIAN	T1	NA	NA	I	G2	NA	NA	NO	No	NA	0	447	0	447	0	447	0	447	HCV;HBV	C1
TCGA-WX-AA46	61	MALE	WHITE	T2	NA	NA	II	G1	NA	NA	NO	No	NA	0	756	0	756	0	756	0	756	HCV	C1
TCGA-O8-A75V	54	MALE	NA	T1	NA	NA	I	G2	NA	NA	NO	No	NA	0	538	0	538	NA	NA	0	538	Unknown	C1
TCGA-BC-A10S	81	MALE	WHITE	T3	NA	NA		G1	Recurrence	NA	NA	No	NA	1	1423	1	1423	1	1130	1	1130	Unknown	C1
TCGA-DD-A1ED	68	MALE	WHITE	T1	N0	M0	I	G1	NA	NA	NA	No	NA	0	2301	0	2301	0	2301	0	2301	HBV	C1
TCGA-CC-A9FS	55	MALE	ASIAN	T2	N0	M0	II	G2	Primary	NA	NA	No	NA	0	211	0	211	0	211	1	109	HCV;HBV	C1
TCGA-T1-A6J8	68	MALE	WHITE	T1	NA	M0		G2	NA	NA	NA	No	NA	0	23	0	23	NA	NA	0	23	Unknown	C1
TCGA-DD-A73G	73	FEMALE	WHITE	T1	N0	M0	I	G3	NA	NA	NO	No	NA	0	3478	0	3478	0	3478	0	3478	HBV	C1
TCGA-KR-A7K7	61	FEMALE	WHITE	T2	N0	M0	II	G1	Recurrence	NA	NO	No	NA	0	951	0	951	1	239	1	239	Unknown	C1
TCGA-XR-A8TC	43	FEMALE	WHITE	T1	NA	NA	I	G2	NA	NA	NO	Yes	NA	0	1339	0	1339	0	1339	0	1339	Not Available	C1
TCGA-ZS-A9CD	73	MALE	WHITE	T2	NA	NA	II	G2	Recurrence	NA	NO	No	NA	1	1386	NA	1386	1	371	1	371	HCV;HBV	C1
TCGA-2Y-A9GV	54	FEMALE	WHITE	T1	NA	NA	I	G1	Primary	NA	NO	No	Chemotherapy	1	2532	1	2532	0	2532	1	1745	HCV;HBV	C1
TCGA-BC-A10T	76	MALE	WHITE	T4	NA	NA		G1	Recurrence	NA	NA	No	NA	1	837	1	837	NA	NA	1	598	Not Available	C1
TCGA-DD-AAEI	72	MALE	ASIAN	T1	N0	M0	I	G2	Recurrence	NA	NO	No	NA	0	1531	0	1531	1	491	1	491	Unknown	C1
TCGA-FV-A2QQ	80	MALE	WHITE	T1	N0	NA	I	G2	NA	NA	NA	No	NA	0	729	0	729	0	729	0	729	Not Available	C1
TCGA-EP-A2KC	62	MALE	BLACK	T1	NA	NA	I	G3	NA	NA	NA	No	NA	1	19	0	19	0	19	0	19	Not Available	C1
TCGA-DD-A3A3	45	MALE	ASIAN	T1	N0	M0	I	G2	NA	NA	NA	No	NA	1	535	NA	535	0	535	0	535	Not Available	C1
TCGA-G3-AAV3	58	FEMALE	WHITE	T2	N0	M0	II	G2	NA	NA	NO	No	NA	0	412	0	412	0	412	0	412	Unknown	C1
TCGA-G3-A3CJ	52	MALE	AMERICAN INDIAN	T2	N0	M0	II	G2	Recurrence	NA	NA	No	Targeted Molecular therapy	0	594	0	594	1	296	1	296	Not Available	C1
TCGA-DD-A4NP	32	MALE	WHITE	T1	N0	M0	I	G3	Recurrence	NA	NO	No	NA	0	3308	0	3308	1	1286	1	1286	HBV	C1
TCGA-5R-AA1D	17	FEMALE	WHITE	T3	N0	M0	III	G3	NA	NA	YES	No	NA	0	449	0	449	0	449	0	449	HCV;HBV	C1
TCGA-DD-AAW2	69	MALE	ASIAN	T1	N0	M0	I	G2	Recurrence	NA	NO	No	NA	0	1855	0	1855	1	391	1	391	Unknown	C1
TCGA-2Y-A9GW	64	MALE	WHITE	T1	N0	NA	I	G2	Recurrence	NA	NO	No	NA	1	1271	1	1271	1	1229	1	1229	Unknown	C1
TCGA-DD-A116	68	MALE	ASIAN	T3	N0	M0	III	G3	Recurrence	NA	NA	No	NA	1	1622	0	1622	1	828	1	828	HBV	C1
TCGA-G3-AAUZ	48	MALE	NA	T1	N0	M0	I	G2	NA	NA	NO	No	NA	0	480	0	480	0	480	0	480	HCV;HBV	C1
TCGA-DD-AAD2	66	MALE	ASIAN	T1	N0	M0	I	G2	NA	NA	NO	No	NA	0	658	0	658	0	658	0	658	Unknown	C1
TCGA-DD-AADR	58	MALE	ASIAN	T1	N0	M0	I	G3	Recurrence	NA	NO	No	NA	0	2028	0	2028	1	1700	1	1700	Unknown	C1
TCGA-DD-AAVU	46	MALE	ASIAN	T2	N0	M0	II	G2	Recurrence	NA	NO	No	NA	0	2202	0	2202	1	1630	1	1630	Unknown	C1
TCGA-DD-AADP	45	MALE	ASIAN	T1	N0	M0	I	G3	NA	NA	NO	No	NA	0	458	0	458	0	458	0	458	Unknown	C1
TCGA-2Y-A9H4	68	MALE	BLACK	T1	N0	NA	I	G2	NA	NA	NO	No	NA	0	1452	0	1452	0	1452	0	1452	HCV;HBV	C1
TCGA-EP-A26S	70	MALE	WHITE	T1	N0	NA	I	G2	NA	NA	NA	No	NA	0	608	0	608	NA	NA	0	608	Not Available	C1
TCGA-ED-A7XO	29	MALE	ASIAN	T3	N0	M0	III	G2	Recurrence	NA	NO	No	NA	0	427	0	427	1	262	1	262	HCV;HBV	C1
TCGA-DD-AAVP	48	MALE	ASIAN	T1	N0	M0	I	G1	Recurrence	NA	NO	No	NA	0	2752	0	2752	1	903	1	903	Unknown	C1
TCGA-MI-A75C	64	MALE	WHITE	T1	N0	M0	I	G3	NA	NA	NO	No	NA	0	291	0	291	0	291	0	291	HBV	C1
TCGA-DD-A39W	29	FEMALE	WHITE	T3	N0	M0	III	G2	NA	NA	NA	No	NA	1	827	NA	827	0	827	0	827	Unknown	C1
TCGA-DD-AAVY	56	MALE	ASIAN	T3	N0	M0	III	G2	NA	NA	NO	No	NA	0	1970	0	1970	0	1970	0	1970	Unknown	C1
TCGA-5C-AAPD	61	MALE	ASIAN	T2	N0	M0	II	G1	NA	NA	NO	No	NA	0	20	0	20	0	20	0	20	HBV	C1
TCGA-DD-AAEH	73	MALE	ASIAN	T1	N0	M0	I	G2	Recurrence	NA	NO	No	NA	0	784	0	784	1	644	1	644	Unknown	C1
TCGA-UB-AA0V	69	FEMALE	WHITE	NA	NA	NA	I	G1	NA	NA	NO	No	NA	0	314	0	314	0	314	0	314	HCV;HBV	C1
TCGA-DD-A118	77	FEMALE	WHITE	T2	N0	M0	II	G2	Recurrence	NA	NA	No	NA	0	3437	0	3437	1	658	1	658	HBV	C2
TCGA-DD-A1EF	57	FEMALE	WHITE	T1	N0	M0	I	G3	NA	NA	NA	No	NA	1	394	1	394	NA	NA	1	394	HBV	C2
TCGA-WJ-A86L	68	FEMALE	WHITE	T1	NA	NA	I	G2	NA	NA	NO	No	NA	0	345	0	345	0	345	0	345	HCV;HBV	C2
TCGA-CC-5263	35	MALE	ASIAN	T3	N0	M0	III	G1	NA	NA	NA	No	NA	1	129	0	129	NA	NA	0	129	HCV;HBV	C2
TCGA-DD-AAE6	59	FEMALE	ASIAN	T1	N0	M0	I	G2	Recurrence	NA	NO	No	NA	0	141	0	141	1	105	1	105	Unknown	C2
TCGA-DD-A1EL	23	MALE	BLACK	T2	N0	M0	II	G3	NA	NA	NA	No	NA	1	415	1	415	NA	NA	1	415	HBV	C2
TCGA-G3-A7M6	60	FEMALE	WHITE	T1	NA	NA	I	G3	Recurrence	NA	NO	No	NA	0	632	0	632	1	293	1	293	Unknown	C2
TCGA-DD-AACQ	50	MALE	ASIAN	T2	N0	M0	II	G3	Recurrence	NA	NO	No	NA	1	432	1	432	1	105	1	105	Unknown	C2
TCGA-G3-A25T	45	FEMALE	WHITE	T3	N0	M0	III	G2	Recurrence	NA	NA	No	NA	0	1553	0	1553	1	452	1	452	Not Available	C2
TCGA-DD-AADB	51	MALE	ASIAN	T1	N0	M0	I	G4	NA	NA	NO	No	NA	0	1242	0	1242	0	1242	0	1242	Unknown	C2
TCGA-UB-A7MA	62	FEMALE	WHITE	T2	N0	M0	II	G2	Recurrence	NA	NO	No	NA	0	848	0	848	NA	NA	1	221	HCV;HBV	C2
TCGA-DD-AAD0	73	FEMALE	ASIAN	T1	N0	M0	I	G2	Recurrence	NA	NO	No	NA	0	137	0	137	1	47	1	47	Unknown	C2
TCGA-BC-4072	74	FEMALE	WHITE	T3	N0	M0	III	G3	Recurrence	NA	NA	No	NA	1	1490	1	1490	NA	NA	1	475	Not Available	C2
TCGA-UB-A7MD	67	MALE	BLACK	T1	N0	NA	I	G3	NA	NA	NO	No	NA	1	52	0	52	0	52	0	52	HCV;HBV	C2
TCGA-DD-AACS	39	MALE	ASIAN	T1	N0	M0	I	G3	NA	NA	NO	No	NA	0	1804	0	1804	0	1804	0	1804	Unknown	C2
TCGA-DD-AAEE	55	MALE	ASIAN	T1	N0	M0	I	G4	Recurrence	NA	NO	No	NA	0	810	0	810	1	224	1	224	Unknown	C2
TCGA-CC-A7IE	57	MALE	ASIAN	T3	N0	M0	III	G2	Primary	NA	NA	No	NA	1	217	1	217	0	217	1	169	HCV;HBV	C2
TCGA-WX-AA44	64	FEMALE	WHITE	T1	NA	NA	I	G3	Recurrence	NA	YES	No	Targeted Molecular therapy	0	615	0	615	NA	NA	1	246	HCV	C2
TCGA-ED-A7XP	53	FEMALE	ASIAN	T2	N0	M0	II	G3	Recurrence	NA	NO	No	NA	0	400	0	400	1	187	1	187	HBV	C2
TCGA-BW-A5NQ	63	MALE	WHITE	T1	NA	NA	I	G3	NA	NA	NA	No	NA	0	0	0	0	NA	NA	0	0	Not Available	C2
TCGA-FV-A3R3	38	FEMALE	WHITE	T1	NA	NA	I	G2	NA	NA	NA	No	NA	1	366	0	366	0	366	0	366	Not Available	C2
TCGA-DD-AACL	66	FEMALE	ASIAN	T1	N0	M0	I	G3	NA	NA	NO	No	NA	1	107	NA	107	0	107	0	107	Unknown	C2
TCGA-DD-A4NJ	54	FEMALE	WHITE	T2	N0	M0	II	G2	Recurrence	NA	NO	No	NA	0	928	0	928	1	549	1	549	HBV	C2
TCGA-CC-A5UE	48	MALE	ASIAN	T4	N0	M0	III	G2	Recurrence	NA	NA	No	NA	1	272	1	272	1	175	1	175	HCV;HBV	C2
TCGA-CC-A9FW	68	MALE	ASIAN	T3	N0	M0	III	G2	Recurrence	NA	NA	No	NA	0	248	0	248	1	153	1	153	HCV;HBV	C2
TCGA-DD-A4NQ	60	MALE	WHITE	T2	N0	M0	II	G3	Recurrence	NA	NO	No	Chemotherapy	1	373	1	373	1	126	1	126	HCV;HBV	C2
TCGA-RC-A7SH	42	MALE	ASIAN	T2	N0	M0	II	G3	Recurrence	NA	NO	No	NA	0	468	0	468	1	91	1	91	Not Available	C2
TCGA-G3-AAV1	51	MALE	ASIAN	T4	N0	M0	III	G3	Recurrence	NA	NO	No	NA	1	359	1	359	1	49	1	49	HCV;HBV	C2
TCGA-DD-AA3A	81	FEMALE	WHITE	T1	N0	NA	I	G4	NA	NA	NO	No	NA	1	410	0	410	0	410	0	410	HBV	C2
TCGA-2Y-A9HA	70	MALE	WHITE	T2	NA	NA	II	G2	NA	NA	NO	No	NA	1	36	1	36	NA	NA	1	36	HCV	C2
TCGA-MR-A8JO	34	MALE	WHITE	T1	N0	NA	I	G3	NA	NA	NO	No	NA	0	330	0	330	NA	NA	0	330	HCV;HBV	C2
TCGA-5R-AA1C	57	MALE	WHITE	T2	N0	M0	II	G2	NA	NA	NO	No	NA	0	520	0	520	0	520	0	520	HCV;HBV	C2
TCGA-DD-A4NH	65	FEMALE	WHITE	T3	N0	M0	III	G3	Recurrence	NA	NO	No	Chemotherapy	0	917	0	917	1	161	1	161	HBV	C2
TCGA-BC-A10R	66	FEMALE	WHITE	T3	NA	NA		G2	Recurrence	NA	NA	No	NA	1	308	1	308	1	199	1	199	Not Available	C2
TCGA-ED-A459	47	MALE	ASIAN	T2	N0	M0	II	G2	NA	NA	NO	No	Ancillary	0	910	0	910	0	910	0	910	HBV	C2
TCGA-CC-A7IK	59	MALE	ASIAN	T3	N0	M0	III	G3	Recurrence	NA	NA	No	NA	1	262	1	262	1	150	1	150	HCV;HBV	C2
TCGA-FV-A4ZQ	52	MALE	WHITE	T1	NA	M0	I	G2	NA	NA	NA	No	NA	0	12	0	12	0	12	0	12	HCV	C2
TCGA-G3-A25S	64	MALE	WHITE	T1	N0	M0	I	G2	Recurrence	NA	NA	No	Chemotherapy	1	416	1	416	NA	NA	1	37	Not Available	C2
TCGA-FV-A23B	70	FEMALE	WHITE	T2	N0	M0	II	NA	Recurrence	NA	NA	No	NA	1	1852	1	1852	1	1453	1	1453	Not Available	C2
TCGA-DD-AADD	51	MALE	ASIAN	T1	N0	M0	I	G4	NA	NA	NO	No	NA	0	1231	0	1231	0	1231	0	1231	Unknown	C2
TCGA-RC-A6M3	24	MALE	AMERICAN INDIAN	T2	N0	M0	II	G3	NA	NA	NA	No	NA	0	0	0	0	0	0	0	0	Not Available	C2
TCGA-CC-5260	61	FEMALE	ASIAN	T4	N0	M0	III	G1	NA	NA	NA	No	NA	1	87	0	87	NA	NA	0	87	HCV;HBV	C2
TCGA-G3-AAV7	38	MALE	ASIAN	T2	N0	M0	II	G2	NA	NA	NO	No	NA	0	361	0	361	0	361	0	361	HBV	C2
TCGA-DD-A39Y	67	MALE	ASIAN	T1	NA	M0	I	G3	NA	NA	NA	No	NA	1	171	0	171	0	171	0	171	HBV	C2
TCGA-G3-A25Y	52	FEMALE	ASIAN	T1	N0	M0	I	G3	Recurrence	NA	NA	No	NA	1	452	1	452	1	355	1	355	Not Available	C2
TCGA-DD-A1EG	76	MALE	WHITE	T1	N0	M0	I	G3	Recurrence	NA	NO	No	Chemotherapy	1	1372	1	1372	1	875	1	875	HBV	C2
TCGA-5C-A9VH	70	MALE	WHITE	T1	N0	M0	I	G2	NA	NA	NO	No	NA	0	322	0	322	0	322	0	322	Not Available	C2
TCGA-BC-A10Q	72	FEMALE	WHITE	T2	NA	NA		NA	Recurrence	NA	NA	No	NA	1	1135	1	1135	NA	NA	1	340	Not Available	C2
TCGA-CC-5258	48	MALE	ASIAN	T2	N0	M0	II	G2	NA	NA	NA	No	NA	1	129	0	129	NA	NA	0	129	HCV;HBV	C2
TCGA-G3-A7M9	70	MALE	WHITE	T3	NA	NA	III	G2	NA	NA	NO	No	NA	1	56	NA	56	0	56	0	56	HCV;HBV	C2
TCGA-DD-A4NB	25	MALE	WHITE	T1	N0	M0	I	G2	Recurrence	NA	NO	No	NA	0	989	0	989	1	912	1	912	Unknown	C2
TCGA-ED-A66X	35	MALE	ASIAN	T3	N0	M0	III	G3	Recurrence	NA	NO	No	NA	0	406	0	406	1	124	1	124	HBV	C2
TCGA-DD-A114	42	MALE	BLACK	T2	NA	M0	II	G3	NA	NA	NA	No	NA	1	1149	0	1149	0	1149	0	1149	HCV;HBV	C2
TCGA-XR-A8TG	58	MALE	WHITE	T1	NA	M0	I	G2	Recurrence	NA	NO	No	NA	0	898	0	898	1	350	1	350	Not Available	C2
TCGA-CC-A3MA	61	MALE	ASIAN	T3	N0	M0	III	G2	Recurrence	NA	NA	No	NA	1	303	1	303	1	261	1	261	HCV;HBV	C2
TCGA-DD-AADC	53	MALE	ASIAN	T1	N0	M0	I	G3	Recurrence	NA	NO	No	NA	1	425	1	425	1	101	1	101	Unknown	C2
TCGA-DD-AAD1	51	FEMALE	ASIAN	T1	N0	M0	I	G4	Recurrence	NA	NO	No	NA	0	564	0	564	NA	NA	1	127	Unknown	C2
TCGA-DD-AAVV	56	MALE	ASIAN	T2	N0	M0	II	G3	NA	NA	NO	No	NA	0	2455	0	2455	0	2455	0	2455	Unknown	C2
TCGA-ED-A8O5	59	FEMALE	ASIAN	T3	N0	M0	III	G3	NA	NA	NO	No	NA	0	406	0	406	0	406	0	406	HCV;HBV	C2
TCGA-ED-A97K	54	MALE	ASIAN	T3	N0	M0	III	G2	NA	NA	NO	No	NA	0	6	0	6	0	6	0	6	HBV	C2
TCGA-2V-A95S	NA	MALE	ASIAN	T2	NA	NA	II	G3	NA	NA	NO	No	NA	0	NA	0	NA	0	NA	0	NA	Unknown	C2
TCGA-UB-A7MB	24	MALE	WHITE	T2	NA	NA	II	G3	Recurrence	NA	NO	No	NA	0	601	0	601	1	48	1	48	HCV;HBV	C2
TCGA-CC-5264	71	MALE	ASIAN	T3	N0	M0	III	G2	NA	NA	NA	No	NA	1	102	0	102	NA	NA	0	102	HCV;HBV	C2
TCGA-ED-A66Y	51	FEMALE	ASIAN	T3	N0	M0	III	G3	NA	NA	NO	No	NA	1	296	0	296	0	296	0	296	HBV	C2
TCGA-BC-A8YO	66	FEMALE	WHITE	T4	N0	M0	III	G3	Recurrence	NA	NO	No	Chemotherapy	0	562	0	562	1	220	1	220	Not Available	C2
TCGA-DD-A4NR	85	FEMALE	WHITE	T1	N0	M0	I	G3	NA	NA	NO	No	NA	1	9	0	9	0	9	0	9	HBV	C2
TCGA-CC-A8HU	39	FEMALE	ASIAN	T3	N0	M0	III	G3	Recurrence	NA	NA	No	NA	1	344	1	344	1	301	1	301	HCV;HBV	C2
TCGA-XR-A8TD	49	FEMALE	WHITE	T3	N0	M0	III	G3	NA	NA	NO	No	NA	0	1030	0	1030	0	1030	0	1030	Not Available	C2
TCGA-DD-A4ND	56	FEMALE	WHITE	T1	N0	M0	I	G3	Primary	NA	NO	No	Chemotherapy	0	2746	0	2746	0	2746	1	15	Unknown	C2
TCGA-ZP-A9D2	51	MALE	WHITE	T2	NA	NA		G2	Recurrence	NA	NO	No	NA	1	765	1	765	1	315	1	315	HCV	C2
TCGA-2Y-A9GX	68	MALE	WHITE	T1	NA	NA	I	G2	Recurrence	NA	NO	No	NA	0	2442	0	2442	NA	NA	1	2133	HBV	C2
TCGA-BC-A216	62	FEMALE	WHITE	T3	NA	M0	III	G2	NA	NA	NA	No	NA	0	1351	0	1351	0	1351	0	1351	Not Available	C2
TCGA-CC-A3MB	36	MALE	ASIAN	T3	N0	M0	III	G1	Primary	NA	NA	No	NA	1	315	1	315	0	315	1	260	HCV;HBV	C2
TCGA-DD-A4NE	75	FEMALE	WHITE	T3	N0	M0	III	G3	Recurrence	NA	NO	No	Chemotherapy	1	660	1	660	1	190	1	190	HCV;HBV	C2
TCGA-RC-A6M6	75	MALE	WHITE	T2	NA	M0	II	G3	NA	NA	NA	No	NA	0	9	0	9	NA	NA	0	9	Not Available	C2
TCGA-CC-A5UD	45	MALE	ASIAN	T3	N0	M0	III	G2	Recurrence	NA	NA	No	NA	1	304	1	304	1	182	1	182	HCV;HBV	C2
TCGA-BC-A10U	69	MALE	WHITE	T2	NA	NA		G2	Recurrence	NA	NA	No	NA	1	837	1	837	NA	NA	1	586	Not Available	C2
TCGA-BC-A10Y	76	MALE	WHITE	T4	NA	NA		G3	Recurrence	NA	NA	No	NA	1	711	1	711	1	400	1	400	Not Available	C2
TCGA-CC-A3M9	45	MALE	ASIAN	T3	N0	M0	III	G3	Recurrence	NA	NA	No	NA	1	300	1	300	1	219	1	219	HCV;HBV	C2
TCGA-BW-A5NP	26	FEMALE	WHITE	T2	N0	M1	IV	G3	Recurrence	NA	NO	No	Chemotherapy	0	0	0	0	NA	NA	1	102	Not Available	C2
TCGA-G3-AAV4	83	FEMALE	WHITE	T1	N0	M0	I	G1	NA	NA	NO	No	NA	1	27	0	27	0	27	0	27	Unknown	C2
TCGA-BC-A10W	50	MALE	ASIAN	T4	NA	NA		G3	NA	NA	NA	No	Chemotherapy	1	91	1	91	NA	NA	1	91	HBV	C2
TCGA-CC-A8HS	18	MALE	ASIAN	T3	N1	M0	III	G1	Recurrence	NA	NA	No	NA	1	300	1	300	1	201	1	201	HCV;HBV	C2
TCGA-DD-A1EE	73	MALE	WHITE	T3	N0	M0	III	G3	Recurrence	NA	NA	No	NA	1	349	1	349	1	44	1	44	HCV;HBV	C2
TCGA-FV-A3I1	81	FEMALE	WHITE	T2	N0	NA	II	G2	NA	NA	NA	No	NA	1	247	0	247	0	247	0	247	HCV;HBV	C2
TCGA-G3-A5SJ	59	MALE	WHITE	T1	NA	M0	I	G2	Recurrence	NA	NO	No	NA	0	698	0	698	1	308	1	308	Not Available	C2
TCGA-BC-A3KG	68	FEMALE	WHITE	T2	N0	M0	II	G3	Recurrence	NA	NA	No	NA	0	680	0	680	1	209	1	209	Not Available	C2
TCGA-DD-AAVS	56	MALE	ASIAN	T1	N0	M0	I	G2	NA	NA	NO	No	NA	0	1823	0	1823	0	1823	0	1823	Unknown	C2
TCGA-FV-A3I0	76	FEMALE	WHITE	T2	NA	M0	II	G2	Recurrence	NA	NA	No	Chemotherapy	0	848	0	848	1	159	1	159	Not Available	C2
TCGA-CC-A9FV	57	MALE	ASIAN	T3	N0	M0	III	G2	NA	NA	NA	No	NA	0	0	0	0	0	0	0	0	HCV;HBV	C2
TCGA-BC-A217	75	FEMALE	WHITE	T2	NA	M0	II	G3	NA	NA	NA	No	NA	1	1397	0	1397	0	1397	0	1397	Not Available	C2
TCGA-DD-AAD5	54	MALE	ASIAN	T1	N0	M0	I	G3	Recurrence	NA	NO	No	NA	0	1345	0	1345	1	130	1	130	Unknown	C2
TCGA-2Y-A9H0	49	MALE	WHITE	T3	N0	M0	III	G1	NA	NA	NO	No	NA	0	3675	0	3675	0	3675	0	3675	Unknown	C2
TCGA-DD-A1EI	46	MALE	ASIAN	T1	N0	M0	I	G2	NA	NA	NA	No	NA	0	183	0	183	0	183	0	183	HBV	C2
TCGA-LG-A9QC	48	MALE	WHITE	T1	NA	M0	I	G2	NA	NA	NA	No	NA	0	425	0	425	0	425	0	425	Not Available	C2
TCGA-GJ-A3OU	59	MALE	WHITE	T1	NA	NA	I	G2	Recurrence	NA	NO	No	NA	0	879	0	879	NA	NA	1	879	HCV	C2
TCGA-CC-A7IJ	56	MALE	ASIAN	T2	N0	M0	II	G3	NA	NA	NA	No	NA	0	382	0	382	0	382	0	382	HCV;HBV	C2
TCGA-DD-AACA	65	MALE	ASIAN	T1	N0	M0	I	G3	Recurrence	NA	NO	No	NA	0	2301	0	2301	1	776	1	776	Unknown	C2
TCGA-2Y-A9GS	58	MALE	WHITE	T2	NA	NA		G2	Recurrence	NA	NO	No	NA	1	724	1	724	1	102	1	102	HCV;HBV	C2
TCGA-DD-AACW	43	MALE	ASIAN	T1	N0	M0	I	G3	NA	NA	NO	No	NA	0	1424	0	1424	0	1424	0	1424	Unknown	C2
TCGA-FV-A3R2	75	MALE	WHITE	T1	NA	NA	I	NA	NA	NA	NO	No	Chemotherapy	1	194	0	194	0	194	0	194	HCV;HBV	C2
TCGA-5C-A9VG	58	MALE	WHITE	T2	N0	M0	II	G2	NA	NA	NO	No	NA	0	328	0	328	0	328	0	328	Not Available	C2
TCGA-ZP-A9CZ	72	MALE	ASIAN	T1	NA	NA		G1	NA	NA	NO	No	NA	0	706	0	706	0	706	0	706	HBV	C2
TCGA-DD-A1EJ	71	FEMALE	WHITE	T1	N1	M0	III	G2	Recurrence	NA	NA	No	Chemotherapy	1	1005	1	1005	1	263	1	263	HBV	C2
TCGA-DD-AACU	59	MALE	ASIAN	T1	N0	M0	I	G3	NA	NA	NO	No	NA	0	1567	0	1567	0	1567	0	1567	Unknown	C2
TCGA-2Y-A9H2	64	FEMALE	WHITE	T1	N0	NA	I	G3	NA	NA	NO	No	NA	0	1731	0	1731	0	1731	0	1731	HCV;HBV	C2
TCGA-CC-5261	44	MALE	ASIAN	T2	N0	M0	II	G2	NA	NA	NA	No	NA	1	97	0	97	NA	NA	0	97	HCV;HBV	C2
TCGA-EP-A3RK	73	MALE	WHITE	T3	NA	NA	III	G2	Recurrence	NA	NA	No	NA	0	363	0	363	NA	NA	1	320	Not Available	C2
TCGA-BC-A112	80	MALE	WHITE	T3	NA	NA		G2	NA	NA	NA	No	NA	1	153	0	153	0	153	0	153	Not Available	C2
TCGA-DD-AACX	66	MALE	ASIAN	T2	N0	M0	II	G3	Recurrence	NA	NO	No	NA	0	170	0	170	1	42	1	42	Unknown	C2
TCGA-DD-A4NN	56	FEMALE	WHITE	T1	N0	M0	I	G3	Recurrence	NA	NO	No	NA	1	899	1	899	1	166	1	166	Unknown	C2
TCGA-DD-AACZ	63	FEMALE	ASIAN	T1	N0	M0	I	G4	Recurrence	NA	NO	No	NA	1	171	0	171	1	88	1	88	Unknown	C2
TCGA-DD-AAE0	45	FEMALE	ASIAN	T3	N0	M0	III	G4	NA	NA	NO	No	NA	0	555	0	555	0	555	0	555	Unknown	C2
TCGA-YA-A8S7	68	MALE	WHITE	T3	N0	NA	III	G3	Recurrence	NA	NO	No	NA	1	412	1	412	1	398	1	398	Unknown	C2
TCGA-2Y-A9GY	64	FEMALE	WHITE	T2	NA	NA	II	G3	Recurrence	NA	NO	No	NA	1	757	1	757	1	637	1	637	Unknown	C2
TCGA-ED-A8O6	50	FEMALE	ASIAN	T3	N0	M0	III	G3	NA	NA	NO	No	NA	1	56	0	56	0	56	0	56	HCV;HBV	C2
TCGA-ZP-A9D4	64	FEMALE	WHITE	T1	NA	NA		G1	NA	NA	NO	No	NA	0	395	0	395	0	395	0	395	Unknown	C2
TCGA-DD-A1EH	23	MALE	WHITE	T3	N0	M0	III	G3	Recurrence	NA	NA	No	Chemotherapy	0	1495	0	1495	1	120	1	120	HBV	C2
TCGA-BC-A10Z	62	FEMALE	WHITE	T1	N0	NA	I	G2	NA	NA	NA	No	NA	1	34	0	34	0	34	0	34	Unknown	C2
TCGA-ED-A7PX	48	FEMALE	ASIAN	T2	NA	M0	II	G3	NA	NA	NO	No	NA	0	6	0	6	0	6	0	6	HBV	C2
TCGA-CC-A8HV	51	FEMALE	ASIAN	T2	N0	M0	II	G2	Recurrence	NA	NA	No	Targeted Molecular therapy	1	279	1	279	1	149	1	149	HCV;HBV	C2
TCGA-GJ-A9DB	68	MALE	WHITE	T1	N0	NA	I	G2	NA	NA	NO	No	NA	1	67	NA	67	0	67	0	67	Not Available	C2
TCGA-MI-A75I	61	MALE	BLACK	T2	NA	NA		G1	NA	NA	NA	No	NA	0	630	0	630	1	265	1	265	Unknown	C2
TCGA-CC-A5UC	63	MALE	ASIAN	T3	N0	M0	III	G3	Primary	NA	NA	No	NA	1	347	1	347	0	347	1	312	HCV;HBV	C2
TCGA-DD-AACK	70	MALE	ASIAN	T1	N0	M0	I	G2	NA	NA	NO	No	NA	0	9	0	9	0	9	0	9	Unknown	C2
TCGA-DD-AADL	58	MALE	ASIAN	T1	N0	M0	I	G4	NA	NA	NO	No	NA	0	636	0	636	0	636	0	636	Unknown	C2
TCGA-UB-A7MC	59	MALE	WHITE	T3	N0	NA	III	G3	Recurrence	NA	NO	No	NA	0	500	0	500	1	359	1	359	HCV;HBV	C2
TCGA-ED-A82E	60	FEMALE	ASIAN	T3	N0	M0	III	G2	NA	NA	NO	No	NA	0	408	0	408	0	408	0	408	HCV;HBV	C2
TCGA-UB-AA0U	60	MALE	WHITE	T2	NA	NA	II	G2	Recurrence	NA	NO	No	NA	0	327	0	327	NA	NA	1	106	HCV;HBV	C2
TCGA-CC-A9FU	52	FEMALE	ASIAN	T3	N0	M0	III	G2	NA	NA	NA	No	NA	0	0	0	0	0	0	0	0	HCV;HBV	C2
TCGA-DD-AADW	48	MALE	ASIAN	T1	N0	M0	I	G3	Recurrence	NA	NO	No	NA	0	587	0	587	1	386	1	386	Unknown	C2
TCGA-DD-AACB	74	FEMALE	ASIAN	T1	N0	M0	I	G3	NA	NA	NO	No	NA	0	2324	0	2324	0	2324	0	2324	Unknown	C2
TCGA-DD-AACP	64	MALE	ASIAN	T1	N0	M0	I	G3	NA	NA	NO	No	NA	0	415	0	415	0	415	0	415	Unknown	C2
TCGA-DD-A4NS	61	FEMALE	WHITE	T1	N0	M0	I	G2	Recurrence	NA	NO	No	Chemotherapy	1	2456	1	2456	1	893	1	893	HBV	C2
TCGA-DD-AACH	69	MALE	ASIAN	T2	N0	M0	II	G3	Recurrence	NA	NO	No	NA	1	195	0	195	1	83	1	83	Unknown	C2
TCGA-DD-AACN	32	MALE	ASIAN	T1	N0	M0	I	G3	Recurrence	NA	NO	No	NA	0	1302	0	1302	1	357	1	357	Unknown	C2
TCGA-PD-A5DF	58	FEMALE	WHITE	T4	N0	M0	III	G2	NA	NA	NO	No	NA	1	639	1	639	NA	NA	1	639	Unknown	C2
TCGA-CC-A7IG	47	MALE	ASIAN	T2	N0	M0	II	G2	Recurrence	NA	NA	No	NA	1	299	1	299	1	195	1	195	HCV;HBV	C2
TCGA-4R-AA8I	66	MALE	WHITE	T2	NA	NA	II	G2	Recurrence	NA	NO	No	NA	1	262	1	262	1	158	1	158	HCV;HBV	C2
TCGA-DD-A4NG	77	MALE	WHITE	T3	NA	M0	III	G2	Recurrence	NA	NO	No	NA	1	802	1	802	1	430	1	430	HBV	C2
TCGA-ED-A5KG	60	FEMALE	ASIAN	T2	N0	M0	II	G2	Primary	NA	NO	No	NA	0	854	0	854	0	854	1	110	HBV	C2
TCGA-CC-A1HT	50	MALE	ASIAN	T3	N0	M0	III	G3	NA	NA	NA	No	NA	1	101	0	101	NA	NA	0	101	HCV;HBV	C2
TCGA-DD-AAC8	72	MALE	ASIAN	T1	N0	M0	I	G3	NA	NA	NO	No	NA	1	16	0	16	0	16	0	16	Unknown	C2
TCGA-BD-A3EP	75	FEMALE	BLACK	T1	N0	M0	I	G2	NA	NA	NA	No	NA	0	409	0	409	0	409	0	409	Not Available	C2
TCGA-QA-A7B7	48	MALE	BLACK	T2	NA	NA	II	G2	Recurrence	NA	NO	No	NA	0	94	0	94	NA	NA	1	88	Unknown	C2
TCGA-DD-A1EA	68	MALE	ASIAN	T2	N0	M0	II	G2	Recurrence	NA	NA	No	NA	0	2415	0	2415	1	754	1	754	HBV	C2
TCGA-CC-A3MC	54	MALE	ASIAN	T3	N0	M0	III	G2	Recurrence	NA	NA	No	NA	0	363	0	363	1	297	1	297	HCV;HBV	C2
TCGA-FV-A2QR	75	MALE	WHITE	T1	N0	M0	I	G1	Recurrence	NA	NA	No	NA	1	581	1	581	NA	NA	1	561	Not Available	C2
TCGA-K7-AAU7	61	MALE	WHITE	T2	NA	NA	II	G2	Recurrence	NA	NO	No	NA	0	359	0	359	NA	NA	1	58	Unknown	C2
TCGA-G3-AAV6	53	FEMALE	WHITE	T3	N0	M0	III	G3	Recurrence	NA	NO	No	NA	1	65	1	65	1	44	1	44	HBV	C2
TCGA-CC-A8HT	74	MALE	ASIAN	T3	N0	M0	III	G2	Recurrence	NA	NA	No	NA	1	140	1	140	1	83	1	83	HCV;HBV	C2
TCGA-RG-A7D4	69	MALE	BLACK	T2	N0	M0	II	G2	NA	NA	NO	No	NA	0	1098	0	1098	0	1098	0	1098	HCV	C2
TCGA-DD-AAE9	69	MALE	ASIAN	T1	N0	M0	I	G3	NA	NA	NO	No	NA	0	722	0	722	0	722	0	722	Unknown	C2
TCGA-DD-A4NA	67	FEMALE	WHITE	T2	N1	M0	III	G3	NA	NA	NA	No	NA	0	1008	0	1008	0	1008	0	1008	HBV	C2
TCGA-DD-A1EC	20	FEMALE	WHITE	T1	N0	M0	I	G3	Recurrence	NA	NA	No	Chemotherapy	0	602	0	602	1	299	1	299	Unknown	C2
TCGA-BC-4073	73	MALE	WHITE	T3	N0	NA	III	G3	NA	NA	NA	No	Chemotherapy	0	849	0	849	NA	NA	0	849	Not Available	C2
TCGA-WQ-A9G7	71	FEMALE	WHITE	T3	NA	M0		G3	NA	NA	NO	No	NA	0	30	0	30	0	30	0	30	Unknown	C2
TCGA-CC-A7II	54	MALE	ASIAN	T3	N0	M0	III	G3	Recurrence	NA	NA	No	NA	0	399	0	399	1	278	1	278	HCV;HBV	C2
TCGA-GJ-A6C0	75	FEMALE	WHITE	T2	NA	NA	II	G2	NA	NA	NO	No	NA	1	31	NA	31	NA	NA	0	31	Not Available	C2
