# Supplementary material for: A Mitophagy-Related Gene Signature for Subtype Identification and Prognosis Prediction of Hepatocellular Carcinoma
Source: Int J Mol Sci. 2022 Oct 12;23(20):12123. doi: 10.3390/ijms232012123 (PMC9603050; doi:10.3390/ijms232012123)
Supplement: Supplementary file 1 [file ijms-23-12123-s001.zip › Table S2.xlsx]

## Sheet: Table S2
Table S2 Functional analysis of differentially expressed genes.

## Sheet: Table S2_1
Table S2_1 Differentially expressed genes.
Genes	logFC	P.Value	adj.P.Val
YEATS2	-1.17383	5.3574e-63	5.2715e-59
SMARCD1	-1.09321	6.30713e-63	5.2715e-59
SPATS2	-1.26959	9.76241e-63	5.43962e-59
CPSF6	-1.04247	2.12513e-61	8.88092e-58
NAA40	-1.21388	5.35032e-59	1.78872e-55
ZNF207	-0.914578	4.43965e-58	1.23689e-54
ANKRD52	-1.28093	8.64367e-57	2.06411e-53
CASP2	-1.18586	8.11298e-56	1.69521e-52
NUP62	-1.06768	2.84588e-55	5.28574e-52
SGO2	-1.25706	5.33642e-55	8.92036e-52
ANLN	-1.89047	7.23364e-55	1.09925e-51
DCAF16	-1.32051	1.32915e-54	1.85151e-51
BUB1B	-1.72907	1.95625e-54	2.51544e-51
RCC2	-1.35735	2.74766e-54	3.2807e-51
ECT2	-1.771	5.74414e-54	6.40127e-51
NSD2	-1.22505	9.23295e-54	9.64612e-51
RNF34	-0.956625	3.43776e-53	3.38033e-50
E2F6	-0.90755	4.50566e-53	4.18426e-50
TPD52L2	-0.967626	6.15179e-53	5.41228e-50
KPNB1	-1.04215	7.68238e-53	6.42093e-50
KIF2A	-1.17109	8.07054e-53	6.42415e-50
CNOT9	-0.949809	1.0466e-52	7.95223e-50
DENR	-0.827826	1.11917e-52	8.13395e-50
SPDL1	-1.18544	1.83833e-52	1.28039e-49
CBX1	-1.20782	2.12243e-52	1.41914e-49
NCBP2	-0.910252	2.21041e-52	1.42112e-49
SFPQ	-0.926226	5.56169e-52	3.44331e-49
ANKLE2	-0.856105	9.61578e-52	5.74062e-49
CIP2A	-1.36518	1.00128e-51	5.7715e-49
NAT10	-0.783385	1.74878e-51	9.51636e-49
ILF3	-1.00912	1.76482e-51	9.51636e-49
KIF23	-1.57056	2.12412e-51	1.10959e-48
CNOT6	-1.09863	2.36641e-51	1.19869e-48
CORO1C	-1.09967	2.48626e-51	1.22236e-48
HNRNPL	-0.745398	2.81628e-51	1.34506e-48
METTL6	-0.708017	3.50602e-51	1.62796e-48
POLA1	-1.12863	3.69999e-51	1.6716e-48
VPS37C	-0.92466	5.02496e-51	2.21045e-48
ANAPC1	-0.753368	6.20646e-51	2.66019e-48
U2AF2	-0.854441	8.76751e-51	3.66394e-48
SPINDOC	-1.40614	1.12813e-50	4.59947e-48
SMPD4	-1.02392	1.49876e-50	5.94494e-48
QSER1	-1.04129	1.52927e-50	5.94494e-48
UBAP2	-1.01594	1.57492e-50	5.98327e-48
PPHLN1	-0.74506	1.82473e-50	6.77827e-48
MTMR2	-1.21072	2.15805e-50	7.84216e-48
NCOA5	-0.962681	2.33084e-50	8.28986e-48
C4orf46	-1.05104	2.49501e-50	8.68888e-48
MRE11	-0.935718	2.67909e-50	9.13952e-48
INCENP	-1.37115	2.94608e-50	9.73404e-48
MAPRE1	-1.22019	2.96982e-50	9.73404e-48
SENP1	-0.940801	5.13166e-50	1.64963e-47
ZNF765	-0.711371	6.82758e-50	2.15339e-47
UBE2Z	-0.94122	6.98494e-50	2.16223e-47
KHDRBS1	-0.772844	1.13642e-49	3.45389e-47
HNRNPU	-0.830024	1.19438e-49	3.50431e-47
MAPKAPK5	-0.670348	1.19494e-49	3.50431e-47
RACGAP1	-1.50213	1.22043e-49	3.51736e-47
SLC36A1	-1.0953	1.38945e-49	3.93662e-47
TDG	-0.978015	1.67551e-49	4.66796e-47
SMARCC1	-1.04436	1.71662e-49	4.70411e-47
RBM12	-0.97014	1.85098e-49	4.99048e-47
RBL1	-1.1565	1.97266e-49	5.23412e-47
PTBP3	-1.12131	2.1668e-49	5.65941e-47
PRDM4	-0.958205	2.83644e-49	7.29446e-47
PTBP1	-0.769915	3.27669e-49	8.29897e-47
BUB1	-1.54854	3.39637e-49	8.47369e-47
HAUS6	-1.07618	3.49343e-49	8.58768e-47
CKAP5	-1.03207	4.28438e-49	1.03794e-46
BRPF1	-0.886003	4.59219e-49	1.09661e-46
GAS2L3	-1.26448	5.43659e-49	1.27997e-46
TOPBP1	-1.1921	7.69276e-49	1.786e-46
PSMC3IP	-1.11125	9.53437e-49	2.18324e-46
ADNP	-1.02161	1.60091e-48	3.61632e-46
DEPDC1B	-1.79452	1.84495e-48	4.11203e-46
GINS1	-1.68464	2.70533e-48	5.87699e-46
CNOT11	-0.979195	2.74032e-48	5.87699e-46
NUP205	-1.13444	2.77488e-48	5.87699e-46
CENPE	-1.1995	2.77747e-48	5.87699e-46
PPP1CC	-0.858674	2.93412e-48	6.13085e-46
RBMX	-0.867559	3.75122e-48	7.7414e-46
YTHDF1	-0.698062	5.01613e-48	1.02256e-45
HNRNPA3	-0.858705	6.16537e-48	1.24169e-45
SART3	-0.913389	6.64376e-48	1.32211e-45
KIF20B	-1.10274	7.03095e-48	1.37825e-45
GTSE1	-1.59923	7.09076e-48	1.37825e-45
CCDC93	-1.03384	8.64633e-48	1.66129e-45
RPAP3	-0.752207	9.33214e-48	1.77268e-45
LRCH3	-0.788328	9.44276e-48	1.77354e-45
XRCC2	-1.14957	9.90642e-48	1.83995e-45
RHNO1	-1.15163	1.14372e-47	2.10092e-45
LARP4B	-0.883002	1.24252e-47	2.2576e-45
NCAPD2	-1.41717	1.46839e-47	2.63931e-45
FUBP1	-1.13529	1.54149e-47	2.74123e-45
KIF11	-1.47408	1.76537e-47	3.10632e-45
RBM45	-0.570403	1.79379e-47	3.12343e-45
HCFC1	-0.957923	1.94635e-47	3.35414e-45
BARD1	-1.09911	1.99455e-47	3.40213e-45
CEP55	-1.60263	2.10425e-47	3.55299e-45
PLXNA1	-1.41359	2.17524e-47	3.63613e-45
MACROH2A1	-0.906489	2.45111e-47	4.05671e-45
TARDBP	-0.504369	3.01388e-47	4.93922e-45
ZFC3H1	-1.00934	3.0755e-47	4.99127e-45
PRKCI	-1.0486	3.20163e-47	5.146e-45
UBE2E1	-0.875578	3.50898e-47	5.5863e-45
DBF4B	-0.929308	3.65314e-47	5.76094e-45
UTP20	-0.957704	3.98051e-47	6.18584e-45
NUP107	-1.01232	3.99659e-47	6.18584e-45
SOGA1	-1.2459	4.06492e-47	6.21955e-45
CDC27	-0.880097	4.09279e-47	6.21955e-45
PGS1	-0.873306	5.00757e-47	7.54113e-45
CANT1	-0.940822	5.75173e-47	8.58446e-45
FANCD2	-1.2526	6.09489e-47	8.96748e-45
TMEM201	-1.03455	6.11566e-47	8.96748e-45
NCAPH	-1.60116	6.92691e-47	1.00687e-44
UBA2	-1.00947	7.03913e-47	1.01436e-44
TCERG1	-1.02047	7.17345e-47	1.02488e-44
KIAA1841	-0.855865	7.32243e-47	1.0373e-44
ACTL6A	-1.13637	7.81998e-47	1.09848e-44
PRC1	-1.69536	8.36349e-47	1.16503e-44
KIF18A	-1.25194	8.69515e-47	1.20122e-44
CCAR1	-0.980555	8.98425e-47	1.23099e-44
ZNF142	-0.914798	9.4156e-47	1.2796e-44
CENPK	-1.19114	1.15135e-46	1.55209e-44
IARS1	-1.1244	1.20233e-46	1.60785e-44
WDHD1	-1.1456	1.48806e-46	1.97415e-44
FANCI	-1.37775	1.52439e-46	2.00644e-44
STRN4	-0.912168	1.7096e-46	2.23263e-44
VHL	-1.26038	1.80121e-46	2.33403e-44
CDK16	-1.07008	1.9675e-46	2.52991e-44
PHF21A	-0.97673	2.0034e-46	2.5564e-44
DVL3	-1.02029	2.2677e-46	2.86967e-44
MCM8	-1.18223	2.28324e-46	2.86967e-44
SAE1	-0.956235	2.41532e-46	3.01302e-44
TOP2A	-2.13148	2.4836e-46	3.07524e-44
KCTD7	-0.911385	3.1689e-46	3.89495e-44
CSNK2A1	-0.964533	3.6069e-46	4.40094e-44
ABCC5	-0.920367	4.66491e-46	5.65063e-44
NEDD1	-1.03908	5.15486e-46	6.19918e-44
EWSR1	-0.712203	5.44009e-46	6.49546e-44
SSRP1	-0.890072	5.69932e-46	6.7502e-44
CENPF	-1.72356	5.7342e-46	6.7502e-44
TRA2B	-0.719367	6.39068e-46	7.4704e-44
CCDC97	-0.903391	7.24198e-46	8.40673e-44
CDCA4	-1.22631	7.31196e-46	8.42942e-44
GGA3	-0.892696	7.66875e-46	8.78019e-44
ZBTB40	-0.918897	8.96618e-46	1.01958e-43
PARPBP	-1.15793	9.36954e-46	1.05825e-43
TCF3	-1.12548	9.52021e-46	1.06805e-43
KIF20A	-1.77786	1.31078e-45	1.46073e-43
GPD2	-1.12543	1.33477e-45	1.47761e-43
RALGAPB	-0.91738	1.46505e-45	1.61117e-43
GOSR2	-0.723035	1.50137e-45	1.64032e-43
CHEK1	-1.16862	1.5199e-45	1.64979e-43
RBM12B	-0.953629	1.53458e-45	1.65497e-43
MARK2	-0.996197	1.59458e-45	1.70866e-43
RBM14	-0.713642	1.62764e-45	1.73297e-43
BAZ2A	-1.11734	1.64308e-45	1.73834e-43
UBAP2L	-1.0671	1.82732e-45	1.9211e-43
TICRR	-0.962252	2.04011e-45	2.1314e-43
PROSER3	-0.918066	2.07917e-45	2.15872e-43
FRMD8	-0.950791	2.12156e-45	2.18913e-43
MAD2L1	-1.3355	2.23097e-45	2.28464e-43
RAB35	-0.83436	2.24145e-45	2.28464e-43
PHF20	-0.815653	2.26874e-45	2.29844e-43
DAZAP1	-0.66477	2.3053e-45	2.31576e-43
STIL	-1.1285	2.31355e-45	2.31576e-43
GTF3C2	-0.902667	2.56498e-45	2.55215e-43
HNRNPR	-0.939748	2.58971e-45	2.56152e-43
TTF2	-0.968727	2.64484e-45	2.60066e-43
KIF18B	-1.65514	2.95098e-45	2.88471e-43
CKAP2L	-1.39034	3.04821e-45	2.96244e-43
CSNK1D	-0.816538	3.06891e-45	2.96531e-43
DDX23	-0.772727	3.44411e-45	3.29764e-43
SRSF1	-0.696938	3.45231e-45	3.29764e-43
GTF2H1	-0.762729	4.06583e-45	3.85778e-43
DBF4	-0.990971	4.08487e-45	3.85778e-43
MTBP	-0.747978	4.16396e-45	3.91038e-43
GTPBP4	-0.915398	4.39387e-45	4.10324e-43
GRB2	-0.77025	4.484e-45	4.16414e-43
E2F3	-1.28376	4.97947e-45	4.59872e-43
ARL6IP6	-1.17574	5.26759e-45	4.83669e-43
CENPI	-1.09232	5.29501e-45	4.83669e-43
STK4	-0.896067	5.85391e-45	5.31815e-43
EFTUD2	-0.807793	6.46069e-45	5.83767e-43
DNMT1	-1.35889	6.55508e-45	5.89111e-43
DDX55	-0.868679	7.11786e-45	6.36268e-43
KMT5A	-0.791984	7.47219e-45	6.64389e-43
DCLRE1B	-0.979002	7.8375e-45	6.93183e-43
ATAD5	-0.910077	9.03896e-45	7.95238e-43
GTPBP2	-1.15902	9.26813e-45	8.11131e-43
KIF15	-1.35189	9.54228e-45	8.30775e-43
PTPN23	-0.87142	9.98451e-45	8.64772e-43
GRPEL2	-0.771094	1.06811e-44	9.20337e-43
NCAPD3	-1.03479	1.13883e-44	9.76243e-43
NAA25	-0.815054	1.18749e-44	1.01276e-42
TLK2	-0.69938	1.23011e-44	1.04379e-42
CBX3	-0.872943	1.26938e-44	1.07166e-42
CHORDC1	-1.00225	1.36131e-44	1.1435e-42
MAML1	-0.970203	1.39258e-44	1.16391e-42
KDM5C	-1.02495	1.52661e-44	1.26959e-42
CEP250	-0.860441	1.62752e-44	1.34681e-42
MTF2	-0.997446	1.77193e-44	1.45909e-42
ARL8B	-0.775929	1.81429e-44	1.48665e-42
CSE1L	-0.901087	1.84686e-44	1.50596e-42
SUV39H2	-0.898978	2.5142e-44	2.04016e-42
CENPO	-1.15573	2.57688e-44	2.08093e-42
ARHGAP11A	-1.3764	2.95598e-44	2.37559e-42
KPNA2	-1.31809	3.16955e-44	2.53504e-42
TRIP13	-1.5632	3.39129e-44	2.69947e-42
CDCA8	-1.69292	3.56636e-44	2.82537e-42
WIPF2	-0.924084	3.71133e-44	2.92635e-42
DPF2	-0.7974	4.05964e-44	3.18596e-42
NCOA6	-1.00829	4.15909e-44	3.24876e-42
CERS5	-0.805112	4.64641e-44	3.61253e-42
SMYD5	-0.931375	4.76571e-44	3.68813e-42
TAF3	-0.819783	5.26093e-44	4.05261e-42
RAD51D	-0.772049	5.99189e-44	4.59452e-42
STX6	-0.93399	6.18331e-44	4.71964e-42
MSH2	-1.14229	6.7396e-44	5.12087e-42
RFWD3	-1.01385	6.80911e-44	5.15027e-42
ERCC3	-0.789638	6.86285e-44	5.16754e-42
TAF4	-0.901333	7.33661e-44	5.49949e-42
ERCC6L	-0.974671	7.3962e-44	5.51941e-42
SASS6	-1.02805	7.8801e-44	5.85439e-42
PLK4	-1.09832	8.35078e-44	6.17662e-42
NDC1	-0.981508	9.00881e-44	6.63398e-42
MYO19	-1.057	9.12571e-44	6.69059e-42
MASTL	-1.06522	9.91314e-44	7.22853e-42
EDC3	-0.767917	9.94593e-44	7.22853e-42
PRR11	-1.49778	1.00728e-43	7.28903e-42
EIF2S3	-0.94793	1.03044e-43	7.42447e-42
POU2F1	-0.750421	1.0471e-43	7.51213e-42
RBM19	-0.717515	1.09366e-43	7.81263e-42
NRF1	-0.713229	1.14014e-43	8.11007e-42
ACIN1	-0.831552	1.19785e-43	8.47138e-42
CAPRIN1	-0.93305	1.20606e-43	8.47138e-42
RAD18	-0.805891	1.20614e-43	8.47138e-42
MELK	-1.65706	1.39486e-43	9.75583e-42
RNF216	-0.857933	1.4019e-43	9.76422e-42
EP400	-0.878899	1.43641e-43	9.9336e-42
GPR107	-1.00018	1.4381e-43	9.9336e-42
C2CD3	-0.801258	1.48119e-43	1.01891e-41
ZWILCH	-0.99298	1.51166e-43	1.03561e-41
MPZL1	-1.15045	1.52344e-43	1.03942e-41
DHX37	-0.858362	1.56568e-43	1.0639e-41
UHRF1BP1	-1.01816	1.65254e-43	1.11837e-41
VEZF1	-1.00425	1.7647e-43	1.18946e-41
PLK1	-1.73583	1.95666e-43	1.31356e-41
DR1	-0.902159	2.16278e-43	1.44612e-41
HINFP	-0.625336	2.22091e-43	1.47907e-41
MCM6	-1.40345	2.26914e-43	1.5052e-41
SPPL3	-0.754287	2.37686e-43	1.57042e-41
NUP188	-1.01422	2.70822e-43	1.7823e-41
KIF4A	-1.71764	2.88363e-43	1.8903e-41
GPSM2	-1.04162	3.16815e-43	2.06871e-41
PHTF2	-0.931475	3.23278e-43	2.10269e-41
IQCB1	-1.01017	3.28642e-43	2.12929e-41
CNOT2	-0.693277	3.76069e-43	2.42717e-41
SRRT	-0.73369	3.8966e-43	2.50521e-41
RNF41	-0.776295	4.0923e-43	2.62095e-41
HEATR6	-0.920964	4.15272e-43	2.6495e-41
NCAPG	-1.60804	4.63303e-43	2.9447e-41
PRMT3	-0.941264	4.6661e-43	2.95449e-41
TPM3	-0.914041	4.93701e-43	3.10379e-41
FOXM1	-1.85459	4.93903e-43	3.10379e-41
AGFG1	-0.933316	5.12345e-43	3.20763e-41
MED22	-0.934691	5.24082e-43	3.26886e-41
RBM15B	-0.755204	5.39495e-43	3.35249e-41
POLQ	-0.932083	5.43943e-43	3.36761e-41
HNRNPLL	-0.737474	5.59061e-43	3.44843e-41
CRLF3	-0.924035	5.74097e-43	3.52816e-41
NCL	-0.805197	6.00822e-43	3.67888e-41
RALA	-0.779008	6.60949e-43	4.03227e-41
U2SURP	-0.984541	6.80749e-43	4.13796e-41
TUBA1C	-1.30952	6.92432e-43	4.19373e-41
KCTD10	-0.88688	6.96316e-43	4.20203e-41
MMD	-1.4853	7.16968e-43	4.31109e-41
TFE3	-0.866652	7.64521e-43	4.58037e-41
RUBCN	-0.780116	7.67232e-43	4.58037e-41
CREB1	-0.829957	8.44511e-43	5.02379e-41
ATXN7L3	-1.02618	8.51209e-43	5.04568e-41
RIT1	-0.979947	8.62968e-43	5.09731e-41
INTS4	-0.697675	8.99584e-43	5.277e-41
PSME3	-0.861629	8.99704e-43	5.277e-41
FANCF	-0.84119	9.31149e-43	5.44234e-41
PRIM2	-0.927677	9.94645e-43	5.7932e-41
GMEB1	-0.690583	1.05072e-42	6.09857e-41
CALU	-1.16979	1.08951e-42	6.30182e-41
NDE1	-1.003	1.14337e-42	6.59054e-41
SCMH1	-1.05719	1.33422e-42	7.66423e-41
MCRS1	-0.751865	1.35018e-42	7.72934e-41
METTL4	-0.779946	1.39935e-42	7.98344e-41
ZNF143	-0.808172	1.47227e-42	8.36945e-41
NPEPPS	-1.05657	1.47702e-42	8.36945e-41
PDE7A	-1.11057	1.55979e-42	8.80858e-41
DHX9	-1.00884	1.71009e-42	9.62489e-41
BORA	-0.898507	1.79788e-42	1.0085e-40
BRD9	-0.81149	1.9744e-42	1.10197e-40
HNRNPA2B1	-0.74148	1.97769e-42	1.10197e-40
DGKZ	-0.771355	2.00395e-42	1.11289e-40
NAP1L4	-0.706861	2.01684e-42	1.11634e-40
RAN	-0.907742	2.06237e-42	1.13777e-40
RBM17	-0.79523	2.13308e-42	1.17291e-40
FAM222B	-0.964707	2.14301e-42	1.17451e-40
FBXL19	-1.0061	2.21667e-42	1.21091e-40
LMNB2	-1.29486	2.25247e-42	1.22646e-40
ZNF335	-0.721759	2.29202e-42	1.24394e-40
S100PBP	-0.848415	2.34364e-42	1.26784e-40
FBXO5	-1.13631	2.36175e-42	1.27352e-40
USP39	-0.757386	2.40083e-42	1.29043e-40
STIP1	-0.917337	2.44767e-42	1.31138e-40
CDK4	-1.21225	2.47374e-42	1.32112e-40
HSPA14	-0.849773	2.49716e-42	1.32938e-40
HASPIN	-0.872431	2.7365e-42	1.45217e-40
TASOR	-0.945216	2.76516e-42	1.46273e-40
SRSF10	-0.762951	2.80698e-42	1.48018e-40
ARMC8	-0.733343	2.96081e-42	1.55638e-40
CD2AP	-1.07037	3.02723e-42	1.58631e-40
NDRG3	-1.06258	3.12801e-42	1.634e-40
HMGXB3	-0.810356	3.20591e-42	1.66947e-40
DLGAP5	-1.5716	3.23163e-42	1.67764e-40
DVL2	-1.01447	3.37803e-42	1.74821e-40
RYK	-0.867366	3.44555e-42	1.77765e-40
CDK1	-1.72567	3.53467e-42	1.81802e-40
COPS7B	-0.805504	3.59355e-42	1.84263e-40
PTPDC1	-0.79549	3.68101e-42	1.8817e-40
GCN1	-0.841698	4.07046e-42	2.07444e-40
DHX15	-0.957567	4.30869e-42	2.18918e-40
NUP155	-0.917711	4.59118e-42	2.32564e-40
RNPS1	-0.791276	4.69323e-42	2.37015e-40
KNTC1	-1.27325	4.82263e-42	2.42816e-40
EZH2	-1.31308	4.85391e-42	2.43629e-40
MKI67	-1.68489	4.86791e-42	2.43629e-40
CEP295	-0.819318	5.12193e-42	2.55576e-40
WAC	-0.871391	5.19728e-42	2.58564e-40
CENPL	-1.06979	5.23232e-42	2.59536e-40
YWHAB	-0.727006	5.71385e-42	2.82582e-40
DYRK2	-1.13343	5.81625e-42	2.86798e-40
CDK5R1	-0.924704	6.8393e-42	3.36252e-40
EED	-0.731494	6.97478e-42	3.41907e-40
CCDC6	-0.870365	7.37096e-42	3.60272e-40
CNOT3	-0.833081	7.44187e-42	3.62677e-40
TPX2	-1.79557	8.18395e-42	3.97683e-40
BAK1	-1.27304	8.31579e-42	4.02918e-40
TGFBRAP1	-0.878888	8.71164e-42	4.20878e-40
ZBTB12	-1.39146	9.09402e-42	4.38085e-40
SFSWAP	-0.764798	9.22139e-42	4.42945e-40
HJURP	-1.62045	9.39591e-42	4.50035e-40
PDCL	-0.859778	9.47638e-42	4.52592e-40
MCM2	-1.70364	1.00066e-41	4.76554e-40
XPOT	-1.12346	1.05641e-41	5.01675e-40
PROSER1	-0.985698	1.07304e-41	5.0813e-40
ANAPC7	-0.756626	1.18711e-41	5.60555e-40
DBR1	-0.921056	1.20665e-41	5.68178e-40
UIMC1	-0.753349	1.27684e-41	5.99542e-40
RNF44	-1.13914	1.41136e-41	6.60848e-40
TCOF1	-0.898284	1.51428e-41	7.07057e-40
CEP170	-1.01051	1.54346e-41	7.18677e-40
NCAPG2	-1.2115	1.61044e-41	7.47781e-40
KNOP1	-0.751508	1.63018e-41	7.54851e-40
COMMD2	-0.880746	1.63668e-41	7.55767e-40
KHDC4	-1.12236	1.64549e-41	7.5774e-40
RNF145	-1.22997	1.67893e-41	7.71018e-40
ZNF605	-0.85347	1.73294e-41	7.93637e-40
COIL	-0.803811	1.74971e-41	7.99128e-40
PIGS	-1.10122	1.84248e-41	8.39209e-40
FUNDC1	-0.903277	1.85551e-41	8.42843e-40
TRMT6	-0.863704	1.90368e-41	8.62381e-40
SUPT7L	-0.747312	2.08711e-41	9.4292e-40
NUP37	-0.84905	2.13713e-41	9.61775e-40
ZBTB26	-0.910146	2.14035e-41	9.61775e-40
DIP2B	-0.965037	2.18081e-41	9.7733e-40
UHRF1	-1.53591	2.20237e-41	9.84355e-40
NFYA	-1.10749	2.267e-41	1.01054e-39
UBE2O	-0.816083	2.28235e-41	1.01467e-39
RPIA	-0.83425	2.40791e-41	1.06765e-39
CSNK1G1	-0.782451	2.49918e-41	1.10519e-39
HNRNPM	-0.732616	2.55495e-41	1.12687e-39
BMS1	-0.686414	2.56484e-41	1.12826e-39
BRAP	-0.580909	2.60945e-41	1.14487e-39
CAND1	-0.898018	2.62689e-41	1.1495e-39
ZFP64	-0.777901	2.88711e-41	1.26008e-39
PPP4R1	-0.858366	2.97168e-41	1.29361e-39
KBTBD2	-0.793184	3.08307e-41	1.33861e-39
CCT6A	-0.877501	3.37204e-41	1.46029e-39
CAMSAP2	-1.12011	3.42859e-41	1.48094e-39
TNPO1	-0.890752	3.45488e-41	1.48845e-39
CSRNP2	-1.00254	3.64715e-41	1.56724e-39
SLBP	-0.896124	3.68726e-41	1.58042e-39
GOLGA3	-0.777142	3.77378e-41	1.61336e-39
BRCA1	-1.08025	3.84754e-41	1.6407e-39
YWHAQ	-1.05107	4.1301e-41	1.75671e-39
SRSF3	-0.713729	4.31593e-41	1.82967e-39
BTBD10	-0.879856	4.32351e-41	1.82967e-39
DENND5A	-0.989783	4.55287e-41	1.92186e-39
ZBTB34	-0.921677	4.83383e-41	2.03532e-39
NONO	-0.933233	4.93156e-41	2.07126e-39
RAD51AP1	-1.43309	5.0838e-41	2.12984e-39
UBE2N	-0.707986	5.25763e-41	2.19716e-39
PRRC2A	-1.09704	5.28311e-41	2.20231e-39
NAP1L1	-1.07905	5.35525e-41	2.22682e-39
TOP2B	-0.921069	5.45628e-41	2.26321e-39
TRPC4AP	-0.654606	5.54621e-41	2.29481e-39
RAD1	-0.785916	5.65863e-41	2.33555e-39
CCNF	-1.18822	5.99931e-41	2.47006e-39
ZNF195	-0.853278	6.04549e-41	2.47844e-39
GIT1	-0.950097	6.04932e-41	2.47844e-39
ZNF202	-0.771345	6.14212e-41	2.51031e-39
VPS8	-0.700444	6.34379e-41	2.58641e-39
SETD5	-1.02466	6.78774e-41	2.76068e-39
POLD1	-1.08824	6.84232e-41	2.77612e-39
VPS26A	-0.754591	6.88663e-41	2.78733e-39
PPP1R12A	-0.963042	7.02371e-41	2.83595e-39
NEMP1	-1.20812	7.22021e-41	2.90826e-39
GNPDA1	-1.0696	7.28304e-41	2.92652e-39
USP14	-0.827412	7.82999e-41	3.13411e-39
GMPS	-0.918006	7.83716e-41	3.13411e-39
LIMS1	-1.07029	8.33946e-41	3.32703e-39
ASXL1	-0.92105	8.88831e-41	3.53755e-39
SOCS7	-1.00533	9.80617e-41	3.89359e-39
DCAF7	-0.99047	1.01752e-40	4.03054e-39
MCM10	-1.27053	1.0228e-40	4.04187e-39
CAD	-1.11219	1.14938e-40	4.53136e-39
SAP130	-0.86732	1.17873e-40	4.63616e-39
ARF3	-0.84577	1.19157e-40	4.66791e-39
ZNF587	-0.959022	1.19239e-40	4.66791e-39
ACTR3	-0.882965	1.24153e-40	4.84556e-39
FSD1L	-0.611416	1.24357e-40	4.84556e-39
PYGO2	-0.960903	1.31823e-40	5.12455e-39
LIN9	-1.03961	1.32205e-40	5.12748e-39
MFN1	-0.870228	1.33231e-40	5.15532e-39
R3HDM1	-0.807799	1.34033e-40	5.17437e-39
NUF2	-1.62545	1.38856e-40	5.34821e-39
DNAJC5	-0.885763	1.42983e-40	5.48643e-39
DCK	-1.2226	1.43101e-40	5.48643e-39
DYNC1H1	-0.866593	1.53951e-40	5.88889e-39
DCP1A	-0.825588	1.56751e-40	5.98229e-39
USP3	-0.759622	1.58998e-40	6.05425e-39
KANSL1	-0.953067	1.78518e-40	6.78205e-39
MCM4	-1.40471	1.973e-40	7.4786e-39
AGAP1	-0.948886	2.03905e-40	7.71149e-39
ADO	-0.798361	2.19406e-40	8.27898e-39
RBM28	-0.67199	2.20604e-40	8.30544e-39
TRIM59	-0.81271	2.26688e-40	8.51533e-39
CBL	-1.01364	2.29497e-40	8.60151e-39
DNM1L	-0.900134	2.35194e-40	8.79532e-39
SPRING1	-1.27415	2.4037e-40	8.96881e-39
CLSPN	-1.06048	2.44628e-40	9.10734e-39
HSF2	-0.974833	2.4859e-40	9.23429e-39
BEND3	-0.931671	2.63051e-40	9.74978e-39
ORC1	-1.36631	2.81274e-40	1.04022e-38
LSM14B	-1.0004	2.85949e-40	1.05517e-38
POGK	-1.09467	2.9401e-40	1.08253e-38
SFR1	-0.875381	2.96925e-40	1.09086e-38
CWC27	-0.716771	3.04227e-40	1.11523e-38
SUZ12	-1.00972	3.08536e-40	1.12855e-38
TUBA1B	-1.60381	3.16695e-40	1.15587e-38
KIF2C	-1.72423	3.18373e-40	1.15946e-38
MED28	-0.793244	3.28633e-40	1.19422e-38
MCM3	-1.33867	3.33589e-40	1.2096e-38
ACLY	-1.08974	3.53406e-40	1.27869e-38
DENND6A	-0.750836	3.55024e-40	1.28177e-38
TMEM237	-0.949751	3.56e-40	1.28252e-38
RIC8A	-0.713035	3.61399e-40	1.29917e-38
FAM118B	-0.731559	3.62452e-40	1.30016e-38
SRSF2	-0.726499	3.64924e-40	1.30623e-38
KIF14	-1.17287	3.70725e-40	1.32415e-38
PLAGL2	-1.10549	3.86992e-40	1.37931e-38
DLGAP4	-0.882867	4.06536e-40	1.44384e-38
LIMK1	-1.31783	4.06824e-40	1.44384e-38
PAFAH1B2	-0.746017	4.11928e-40	1.45885e-38
PRR12	-1.09053	4.60027e-40	1.62575e-38
ANKRD40	-0.852024	4.80997e-40	1.69627e-38
CCT2	-0.867269	4.82808e-40	1.69908e-38
FAM219A	-0.86604	4.84665e-40	1.70203e-38
GTF3C3	-0.786455	4.90897e-40	1.7203e-38
CBFA2T2	-0.966409	5.02895e-40	1.75866e-38
HAUS3	-0.764411	5.6833e-40	1.98334e-38
PNMA1	-1.40443	5.8007e-40	2.02009e-38
POC5	-0.735061	5.81431e-40	2.02062e-38
ZNF248	-0.766637	5.90091e-40	2.04647e-38
KANSL3	-0.850645	6.0515e-40	2.09434e-38
PIP4K2B	-0.85243	6.36081e-40	2.19685e-38
CCDC43	-0.867221	7.4918e-40	2.58212e-38
XPO5	-0.910718	7.57384e-40	2.60503e-38
DYNC1LI1	-0.670781	8.04819e-40	2.7625e-38
ASAP1	-1.28883	8.24083e-40	2.82282e-38
JRKL	-1.07502	8.62014e-40	2.94671e-38
ATP7A	-0.843531	8.8393e-40	3.01546e-38
TP53BP1	-1.02881	9.00818e-40	3.06682e-38
SSB	-0.824666	9.68979e-40	3.29217e-38
NUSAP1	-1.62513	9.96117e-40	3.3775e-38
UBTD2	-0.836645	1.00933e-39	3.41537e-38
RAD54L	-1.35411	1.05472e-39	3.5549e-38
DROSHA	-0.846011	1.05482e-39	3.5549e-38
EXO1	-1.33211	1.09032e-39	3.66716e-38
CIZ1	-0.908394	1.19681e-39	4.01723e-38
SLC39A1	-0.938046	1.22197e-39	4.09347e-38
LMNB1	-1.58613	1.23374e-39	4.12464e-38
USP1	-1.10081	1.24015e-39	4.1378e-38
DDX52	-0.722243	1.26835e-39	4.22344e-38
NEK2	-1.65981	1.30882e-39	4.34955e-38
THUMPD3	-0.677583	1.36356e-39	4.52247e-38
HDAC2	-0.905085	1.37819e-39	4.56194e-38
CNNM4	-0.995023	1.39331e-39	4.60288e-38
RCN2	-0.971093	1.40861e-39	4.64423e-38
CDC6	-1.59161	1.49316e-39	4.91333e-38
DNAJC9	-1.10449	1.5194e-39	4.98985e-38
STRBP	-0.834361	1.56815e-39	5.13986e-38
ABI2	-0.859008	1.61143e-39	5.2664e-38
BTBD3	-1.15282	1.61306e-39	5.2664e-38
MGME1	-0.88058	1.62603e-39	5.2984e-38
CDYL	-0.886594	1.63259e-39	5.30941e-38
ISG20L2	-0.836705	1.67908e-39	5.44999e-38
LSM14A	-0.800273	1.76846e-39	5.72897e-38
FIP1L1	-0.832139	1.80081e-39	5.82249e-38
SP1	-0.859476	1.80659e-39	5.8299e-38
PPP6R1	-0.970918	1.88083e-39	6.0578e-38
AMD1	-0.938138	2.06734e-39	6.64569e-38
SET	-0.856929	2.20035e-39	7.05969e-38
TTI1	-0.815064	2.22894e-39	7.13772e-38
PCNP	-0.818762	2.23631e-39	7.14764e-38
CDK2	-1.14791	2.47513e-39	7.89586e-38
TSN	-0.793109	2.48732e-39	7.91963e-38
RAI1	-1.17081	2.50305e-39	7.95457e-38
MOB1A	-0.955352	2.61465e-39	8.29344e-38
MORF4L1	-0.727674	2.84988e-39	9.02246e-38
OBI1	-0.880718	2.90106e-39	9.16587e-38
SMC4	-1.53808	2.90615e-39	9.16587e-38
HNRNPC	-0.651685	3.00038e-39	9.43424e-38
MAU2	-0.893149	3.00252e-39	9.43424e-38
SOCS5	-0.904353	3.02772e-39	9.49557e-38
SOAT1	-1.00389	3.12535e-39	9.78339e-38
RIF1	-0.885946	3.1875e-39	9.9593e-38
UBE2I	-0.769481	3.34926e-39	1.04452e-37
LUC7L3	-0.841984	3.4284e-39	1.06721e-37
CDCA2	-1.19863	3.45379e-39	1.07311e-37
STAM	-0.922839	3.46638e-39	1.07503e-37
MFSD14B	-1.07858	3.48044e-39	1.07739e-37
ADNP2	-0.946894	3.51328e-39	1.08555e-37
FAM104A	-0.773009	3.52442e-39	1.08698e-37
NCKAP1	-1.02345	3.62181e-39	1.11383e-37
KIFC1	-1.77147	3.6248e-39	1.11383e-37
KANSL2	-0.862093	3.80829e-39	1.16806e-37
KHSRP	-0.895984	3.90321e-39	1.19498e-37
MED15	-0.853057	3.91051e-39	1.19503e-37
ZNF107	-0.964399	3.99794e-39	1.21952e-37
EME1	-1.14646	4.10818e-39	1.25086e-37
ARPC2	-0.755386	4.24518e-39	1.29023e-37
FAM98B	-0.805485	4.25643e-39	1.2913e-37
HNRNPA0	-0.835427	4.4043e-39	1.33295e-37
ARID2	-0.804485	4.40967e-39	1.33295e-37
RBBP4	-0.98915	4.42917e-39	1.33643e-37
CHAF1B	-1.39941	4.64679e-39	1.39956e-37
OLA1	-0.823331	4.6675e-39	1.40327e-37
POLR2D	-0.669055	4.82764e-39	1.44881e-37
H2AZ1	-1.11708	4.93089e-39	1.47715e-37
CASC3	-0.853153	5.02555e-39	1.50281e-37
SGO1	-1.2008	5.10185e-39	1.5229e-37
RNF220	-0.681881	5.21554e-39	1.55406e-37
MMS22L	-0.630454	5.22733e-39	1.5548e-37
KDM1A	-0.79428	5.27867e-39	1.56729e-37
TTK	-1.43115	5.4833e-39	1.62516e-37
HNRNPK	-0.72911	5.54522e-39	1.6406e-37
POLR1A	-0.789758	5.5639e-39	1.64322e-37
SRC	-1.7148	5.72058e-39	1.68651e-37
FAAP24	-0.8791	5.79489e-39	1.70541e-37
ARHGEF39	-1.01513	6.30217e-39	1.85144e-37
TAF1B	-0.845458	6.37016e-39	1.86813e-37
ANKRD27	-0.99736	6.68662e-39	1.9575e-37
SEPTIN2	-1.09551	6.80036e-39	1.98732e-37
RNMT	-0.902081	6.8366e-39	1.99372e-37
SUCO	-1.04385	6.84611e-39	1.99372e-37
NRAS	-0.973153	7.3351e-39	2.13241e-37
QTRT2	-0.792689	7.67005e-39	2.22591e-37
HECTD2	-0.780296	7.93317e-39	2.29828e-37
MIS18BP1	-1.02263	8.46555e-39	2.44827e-37
MYBL2	-2.26894	8.61722e-39	2.48783e-37
MTA2	-0.715444	8.76334e-39	2.52565e-37
G2E3	-0.774769	8.87992e-39	2.55485e-37
MSANTD3	-0.935211	8.91483e-39	2.56049e-37
PDCD7	-0.740892	9.06301e-39	2.59858e-37
CAPZA1	-0.904339	9.28497e-39	2.65766e-37
ABL1	-1.08501	9.35545e-39	2.67326e-37
UNK	-0.882653	9.47957e-39	2.7041e-37
ANAPC5	-0.636697	9.54441e-39	2.71796e-37
THOC2	-0.922067	9.59177e-39	2.7268e-37
PPME1	-0.722497	9.68739e-39	2.74693e-37
WDR62	-1.10043	9.69543e-39	2.74693e-37
SMNDC1	-0.747304	1.10227e-38	3.11769e-37
SLC37A3	-0.866517	1.14484e-38	3.23261e-37
NSD1	-0.895856	1.15084e-38	3.2441e-37
PPAT	-0.913316	1.20707e-38	3.39686e-37
PHF19	-1.16209	1.21229e-38	3.40583e-37
ZBED4	-0.949912	1.22723e-38	3.44201e-37
CHTOP	-0.715096	1.23507e-38	3.45819e-37
ABCC10	-0.95953	1.25615e-38	3.51134e-37
QRICH1	-0.717934	1.35717e-38	3.78739e-37
SHCBP1	-1.33876	1.50482e-38	4.19242e-37
MTA3	-0.825281	1.53297e-38	4.26376e-37
GINS4	-1.08324	1.64824e-38	4.57675e-37
ZNF124	-0.897539	1.67848e-38	4.65299e-37
IKBIP	-0.983277	1.7438e-38	4.82108e-37
ZBED8	-0.918393	1.74489e-38	4.82108e-37
WDR75	-0.757449	1.89476e-38	5.22654e-37
RAE1	-0.761288	1.9893e-38	5.47827e-37
SMC2	-1.13007	2.05423e-38	5.64778e-37
BCL9	-1.28203	2.07344e-38	5.69123e-37
FNBP4	-0.972567	2.12558e-38	5.82477e-37
CYRIB	-1.08847	2.17628e-38	5.95397e-37
ZNF84	-0.821153	2.18013e-38	5.95475e-37
GSK3A	-0.686308	2.2064e-38	6.01667e-37
MZT1	-0.931866	2.26316e-38	6.16141e-37
SF1	-0.624256	2.27717e-38	6.18946e-37
HNRNPUL1	-0.850611	2.37753e-38	6.45175e-37
LRRC37B	-0.692145	2.42351e-38	6.56586e-37
MED17	-0.755423	2.63285e-38	7.12147e-37
DIDO1	-0.882825	2.70901e-38	7.31563e-37
DDX42	-0.731961	2.78792e-38	7.51659e-37
CDCA5	-1.50945	2.82349e-38	7.60024e-37
NME6	-0.648547	2.92164e-38	7.8518e-37
PARG	-0.812354	3.14567e-38	8.44029e-37
PPP5C	-0.787045	3.2071e-38	8.59132e-37
FAM53C	-0.823367	3.25311e-38	8.70064e-37
SRPK1	-0.979448	3.5445e-38	9.46483e-37
SUPT16H	-0.832778	3.62536e-38	9.66532e-37
CHD4	-0.78382	3.84269e-38	1.02284e-36
FAM220A	-0.801185	3.8545e-38	1.02435e-36
AEBP2	-0.869684	4.03871e-38	1.07161e-36
CKAP2	-1.18837	4.26092e-38	1.12877e-36
HMGXB4	-0.965437	4.31957e-38	1.1425e-36
PRPF38B	-0.952181	4.60826e-38	1.21693e-36
SLC26A11	-0.866521	4.66124e-38	1.22858e-36
PMS1	-0.719975	4.66709e-38	1.22858e-36
ENOPH1	-0.88343	4.71067e-38	1.23811e-36
ZMYM4	-0.925303	4.75349e-38	1.2474e-36
ORC6	-1.1718	4.85836e-38	1.27292e-36
ATXN2L	-1.03024	5.01385e-38	1.3116e-36
ZBED5	-0.857867	5.12824e-38	1.33943e-36
RPA1	-0.900582	5.38524e-38	1.40436e-36
SUGP2	-1.03938	5.41769e-38	1.41062e-36
ZSCAN20	-0.517781	5.76651e-38	1.49911e-36
NUP43	-0.841353	5.86557e-38	1.5225e-36
ZNF668	-0.716202	6.01851e-38	1.55977e-36
TMEM185B	-0.993833	6.20167e-38	1.60475e-36
INPP4A	-0.795895	6.3441e-38	1.63907e-36
CS	-1.00826	6.44503e-38	1.66258e-36
FOXK1	-0.967374	6.50536e-38	1.67556e-36
UBE2D1	-0.887388	6.87712e-38	1.76858e-36
SLC25A19	-0.941183	6.91124e-38	1.77463e-36
CNTRL	-0.964585	6.92192e-38	1.77465e-36
TRIM37	-0.950489	7.20101e-38	1.84337e-36
PTPN1	-0.849127	7.2438e-38	1.85149e-36
SAMD4B	-0.793897	7.3323e-38	1.87125e-36
ZC2HC1A	-1.08727	7.48617e-38	1.9076e-36
TEX10	-0.79193	7.67211e-38	1.95201e-36
HELLS	-1.15847	7.7305e-38	1.96388e-36
HNRNPH3	-0.831122	8.07519e-38	2.04833e-36
EIF4G2	-0.965727	8.13892e-38	2.06137e-36
TAOK1	-0.931782	8.27887e-38	2.09364e-36
PHIP	-0.956423	8.51094e-38	2.14908e-36
GMEB2	-0.712773	8.56316e-38	2.159e-36
NAA15	-0.754649	8.62803e-38	2.17208e-36
CEP135	-0.699574	8.65993e-38	2.17683e-36
SUPT20H	-0.847766	8.8753e-38	2.22762e-36
BMT2	-0.806908	9.1845e-38	2.30177e-36
UTP18	-0.807222	9.35749e-38	2.34161e-36
PTPN12	-1.05449	9.91693e-38	2.4779e-36
NUP210	-1.16489	1.0023e-37	2.50066e-36
CCNB1	-1.66972	1.0151e-37	2.52883e-36
KPNA4	-0.744796	1.08588e-37	2.69701e-36
TBC1D22B	-0.94334	1.08674e-37	2.69701e-36
CSTF2	-0.99052	1.08745e-37	2.69701e-36
TMEM184B	-1.02952	1.09013e-37	2.69965e-36
B4GALT4	-0.812708	1.10287e-37	2.72716e-36
CC2D1B	-0.697771	1.13584e-37	2.80455e-36
DENND4B	-0.931447	1.1992e-37	2.9566e-36
RNF24	-1.0125	1.22246e-37	3.00952e-36
LEMD3	-0.875499	1.23277e-37	3.03045e-36
KIF5B	-0.977817	1.26439e-37	3.10361e-36
ELMO2	-0.855238	1.30926e-37	3.20902e-36
WASF2	-0.986132	1.33913e-37	3.27743e-36
TMEM43	-0.999535	1.34551e-37	3.28824e-36
LRRC59	-0.837124	1.37318e-37	3.35097e-36
IFT52	-0.966121	1.43538e-37	3.49765e-36
CENPA	-1.52452	1.47053e-37	3.57807e-36
CWC22	-0.843548	1.51176e-37	3.67306e-36
MITD1	-0.726475	1.51994e-37	3.68756e-36
MED24	-0.821809	1.52418e-37	3.6925e-36
BCOR	-1.11263	1.52749e-37	3.69514e-36
TUG1	-0.943975	1.55782e-37	3.76307e-36
RAD51	-1.20178	1.74925e-37	4.2163e-36
AP3M2	-0.948357	1.75049e-37	4.2163e-36
RBM39	-0.769116	1.78668e-37	4.2973e-36
MAP3K1	-1.03304	1.80703e-37	4.33998e-36
EDRF1	-0.709147	1.82532e-37	4.37762e-36
CEP97	-0.746082	1.89745e-37	4.5441e-36
PRPF40A	-0.830162	1.97807e-37	4.73039e-36
TTC9C	-0.680747	2.00265e-37	4.78233e-36
NAA50	-0.762359	2.04224e-37	4.86992e-36
ZNF473	-0.695682	2.22205e-37	5.29113e-36
RBBP7	-0.789885	2.24841e-37	5.34629e-36
HAUS2	-0.825973	2.29317e-37	5.44497e-36
BRI3BP	-0.961778	2.47243e-37	5.86229e-36
INTS8	-0.896037	2.53934e-37	6.01242e-36
PRPF4B	-0.937039	2.59295e-37	6.13066e-36
ZMYM3	-0.917512	2.61592e-37	6.17624e-36
VRK2	-0.996527	2.71167e-37	6.39326e-36
STXBP4	-0.749252	2.76824e-37	6.51745e-36
MAP4	-0.824215	2.81219e-37	6.6116e-36
PUS7L	-0.710761	2.92016e-37	6.85581e-36
TMEM65	-1.21846	3.06048e-37	7.17517e-36
MSI2	-1.02457	3.11226e-37	7.28635e-36
MAST2	-0.968169	3.17698e-37	7.42747e-36
ATXN2	-0.682896	3.22399e-37	7.52684e-36
ZSCAN25	-0.731707	3.25785e-37	7.59529e-36
HNRNPD	-0.736573	3.27432e-37	7.62306e-36
NEPRO	-0.746552	3.31028e-37	7.69606e-36
RFC4	-1.1738	3.42671e-37	7.95567e-36
ZNF589	-0.734608	3.48384e-37	8.07709e-36
ZWINT	-1.53568	3.66129e-37	8.47675e-36
OTUD3	-0.798911	3.69633e-37	8.54603e-36
MSL1	-0.846343	3.77042e-37	8.7053e-36
CSNK1E	-0.959434	3.99955e-37	9.22158e-36
LCORL	-0.788529	4.09269e-37	9.42332e-36
CDK12	-0.882654	4.14377e-37	9.52783e-36
SBNO1	-0.801045	4.41288e-37	1.01327e-35
GTF3C4	-0.837416	4.85089e-37	1.11231e-35
HNRNPA1	-0.888397	5.03282e-37	1.15245e-35
DDIAS	-0.818589	5.11597e-37	1.16988e-35
FAM193A	-0.817691	5.4496e-37	1.24447e-35
NBEAL2	-1.09416	5.49854e-37	1.25394e-35
BUD13	-0.676802	5.53459e-37	1.26044e-35
WDR45B	-0.864967	5.70705e-37	1.29795e-35
UPF3B	-0.915468	5.753e-37	1.30662e-35
CTDSPL2	-0.875288	5.88674e-37	1.33518e-35
MCU	-0.884912	6.00305e-37	1.35971e-35
ZMYM1	-0.867346	6.06969e-37	1.37295e-35
TBL1XR1	-0.847879	6.12592e-37	1.3838e-35
FOXJ3	-0.881026	6.26258e-37	1.41276e-35
CENPH	-1.10039	6.608e-37	1.48867e-35
MTPN	-0.925818	6.65881e-37	1.4981e-35
DKC1	-0.918461	6.67874e-37	1.50056e-35
IKZF4	-0.643208	7.47143e-37	1.67641e-35
ADAM17	-1.21118	8.10838e-37	1.81689e-35
C5orf34	-0.853805	8.38348e-37	1.87601e-35
CENPJ	-0.897433	8.67583e-37	1.93884e-35
PKM	-1.96447	8.77712e-37	1.95886e-35
CHMP3	-0.912093	8.85786e-37	1.97424e-35
SNX5	-0.74311	9.07055e-37	2.01895e-35
SLC30A6	-0.78967	9.47265e-37	2.10565e-35
SUSD1	-1.09238	9.52789e-37	2.11512e-35
DDX46	-0.798905	9.87879e-37	2.19011e-35
POLR3F	-0.662987	1.00791e-36	2.23156e-35
PWP1	-0.597021	1.02232e-36	2.26045e-35
ACVR1	-1.07986	1.04598e-36	2.30972e-35
MED12	-1.02062	1.0768e-36	2.37464e-35
ZDHHC21	-0.851353	1.10104e-36	2.42489e-35
PRELID3B	-0.864338	1.10363e-36	2.4274e-35
SMARCA4	-0.905942	1.13764e-36	2.49891e-35
SKA3	-1.35124	1.14162e-36	2.50437e-35
PKNOX1	-0.59884	1.17336e-36	2.57063e-35
PAK2	-0.787433	1.1785e-36	2.57852e-35
COLGALT1	-0.867225	1.1889e-36	2.59786e-35
ZFP69B	-0.706539	1.19339e-36	2.60427e-35
FANCB	-0.550088	1.22607e-36	2.6721e-35
GIGYF2	-0.810652	1.24062e-36	2.7003e-35
C17orf80	-0.779719	1.24801e-36	2.71284e-35
ARHGEF2	-1.29731	1.25241e-36	2.71888e-35
NCOR2	-0.961415	1.27849e-36	2.77188e-35
UBTF	-0.678181	1.29305e-36	2.79981e-35
FANCE	-1.14017	1.32914e-36	2.87424e-35
HUWE1	-0.832147	1.34866e-36	2.9127e-35
DNAJC10	-0.936725	1.37052e-36	2.95609e-35
EIF1AD	-0.554479	1.37436e-36	2.96055e-35
TNRC18	-0.985645	1.41043e-36	3.03434e-35
TJAP1	-0.793303	1.44883e-36	3.11293e-35
C18orf54	-0.738634	1.54844e-36	3.32268e-35
CDC7	-1.20375	1.63384e-36	3.50145e-35
MMS19	-0.767813	1.68963e-36	3.61637e-35
AACS	-0.946147	1.69342e-36	3.61984e-35
RNF214	-0.782016	1.74296e-36	3.7208e-35
NEIL3	-1.20782	1.7451e-36	3.7208e-35
NUFIP2	-0.829247	1.75144e-36	3.72957e-35
MFAP1	-0.672348	1.80636e-36	3.84162e-35
KMT2A	-0.86773	1.84639e-36	3.92176e-35
CDV3	-0.752482	1.85583e-36	3.93681e-35
TASOR2	-1.05136	1.89132e-36	4.007e-35
PTMA	-0.786021	1.91297e-36	4.04776e-35
AKAP8	-0.683226	1.94186e-36	4.10369e-35
TET3	-0.985491	1.95127e-36	4.11835e-35
DDX27	-0.716481	2.08092e-36	4.38647e-35
SRSF9	-0.848643	2.13609e-36	4.49709e-35
CEP164	-0.735568	2.14674e-36	4.51382e-35
SPC25	-1.32438	2.17979e-36	4.57756e-35
PLEKHB2	-1.09357	2.24991e-36	4.71889e-35
NKIRAS2	-0.707379	2.32023e-36	4.86026e-35
KAT7	-0.770297	2.36371e-36	4.94516e-35
DTL	-1.48907	2.40244e-36	5.01989e-35
ZMYND8	-0.917851	2.4226e-36	5.0557e-35
DEPDC1	-1.3191	2.51704e-36	5.24625e-35
ZNF431	-0.749657	2.59191e-36	5.39555e-35
RALY	-0.808601	2.60487e-36	5.4158e-35
PLCB3	-0.854434	2.67867e-36	5.56231e-35
ATR	-0.754294	2.72242e-36	5.64614e-35
RUNDC1	-0.802235	2.76102e-36	5.71911e-35
RHOA	-0.619542	2.8011e-36	5.79495e-35
ZNF92	-0.918712	2.81487e-36	5.81624e-35
ATP2B1	-1.05992	2.90418e-36	5.99338e-35
ZNF8	-0.645225	3.12142e-36	6.43374e-35
NDOR1	-0.972979	3.13243e-36	6.44848e-35
CIT	-0.946643	3.14655e-36	6.46958e-35
BTF3L4	-0.759797	3.16867e-36	6.50706e-35
SMCHD1	-0.95985	3.33451e-36	6.83922e-35
CCNB2	-1.63397	3.37094e-36	6.90547e-35
PUS7	-0.976842	3.43985e-36	7.03801e-35
WSB1	-1.11116	3.44955e-36	7.04923e-35
RERE	-1.04053	3.47459e-36	7.09173e-35
FKBP9	-1.01303	3.49822e-36	7.13125e-35
XPO6	-0.705485	3.91295e-36	7.96312e-35
CDC42SE2	-0.888463	3.91582e-36	7.96312e-35
DRAM1	-1.13244	3.9649e-36	8.05313e-35
GPATCH2L	-0.65866	4.11286e-36	8.34351e-35
C2CD5	-0.976355	4.1496e-36	8.40785e-35
PRPF39	-0.86423	4.24187e-36	8.58019e-35
ZNF792	-0.791636	4.24492e-36	8.58019e-35
GEMIN5	-0.794135	4.3426e-36	8.76701e-35
ATP13A2	-1.0467	4.5598e-36	9.1944e-35
NCDN	-0.988124	4.61627e-36	9.29706e-35
MAPK9	-0.782987	4.76907e-36	9.59324e-35
STARD3NL	-0.971964	4.80966e-36	9.66325e-35
SPIN4	-0.970587	4.94728e-36	9.92782e-35
NUP85	-0.785815	5.01839e-36	1.00584e-34
KDM3B	-0.957081	5.12098e-36	1.02518e-34
TM9SF4	-0.734994	5.15503e-36	1.03076e-34
DNMT3B	-1.01051	5.17517e-36	1.03355e-34
LASP1	-0.91295	5.19733e-36	1.03674e-34
HPS4	-0.834413	5.20724e-36	1.03748e-34
GNB1	-0.780933	5.26147e-36	1.04703e-34
ZFR	-0.90224	5.34686e-36	1.06276e-34
SMCR8	-0.948465	5.5008e-36	1.09206e-34
TMEM165	-1.00566	5.55967e-36	1.10244e-34
VEZT	-0.949552	5.72149e-36	1.13318e-34
VANGL1	-0.895526	5.78229e-36	1.14387e-34
PI4KB	-0.85726	5.87569e-36	1.16097e-34
PRKRA	-0.702339	6.3368e-36	1.2506e-34
PACC1	-0.849745	6.40734e-36	1.26303e-34
PHF12	-0.78387	6.44991e-36	1.26993e-34
MUS81	-0.647667	6.7751e-36	1.33238e-34
TRIM65	-0.909653	7.03716e-36	1.38229e-34
HNRNPH1	-0.951179	7.13398e-36	1.39967e-34
TCTN2	-1.15122	7.37016e-36	1.44431e-34
STK25	-0.672501	7.57848e-36	1.4834e-34
MAP3K7	-0.842859	7.61955e-36	1.48969e-34
B4GALT5	-1.15517	7.69102e-36	1.50191e-34
FIGNL1	-1.05002	7.90032e-36	1.54098e-34
LSM12	-0.767648	8.04362e-36	1.5671e-34
EIF4ENIF1	-0.78097	8.07407e-36	1.5712e-34
MRPL42	-0.600933	8.34746e-36	1.62251e-34
BPTF	-0.962469	8.52283e-36	1.65468e-34
NELFA	-0.778487	8.60329e-36	1.66836e-34
EIF2S2	-0.637528	8.64427e-36	1.67436e-34
XPO1	-0.8087	9.20613e-36	1.78113e-34
FAM72B	-0.61429	9.22986e-36	1.78366e-34
HEATR1	-1.1354	9.312e-36	1.79745e-34
ZNF273	-0.548234	9.34755e-36	1.80223e-34
ELOVL1	-0.793862	9.37195e-36	1.80486e-34
PPT1	-1.06552	1.09647e-35	2.10916e-34
NOL8	-0.756352	1.12188e-35	2.15555e-34
CAP1	-0.773732	1.13572e-35	2.17965e-34
FANCG	-1.03616	1.15148e-35	2.20736e-34
CEP78	-0.75479	1.16174e-35	2.22448e-34
NPC1	-0.957965	1.17989e-35	2.25665e-34
MDC1	-1.00218	1.19902e-35	2.2906e-34
RPAP1	-0.73831	1.22833e-35	2.34393e-34
IWS1	-0.70088	1.25672e-35	2.39535e-34
ARHGAP1	-0.868337	1.26167e-35	2.40207e-34
FOXK2	-0.793987	1.27609e-35	2.42675e-34
SMURF2	-0.97282	1.27994e-35	2.4313e-34
FNDC3B	-1.05341	1.31342e-35	2.49208e-34
XXYLT1	-0.928405	1.34066e-35	2.54087e-34
DNAJC13	-0.88648	1.40231e-35	2.6547e-34
FEN1	-1.14545	1.43709e-35	2.71746e-34
FAF2	-0.697901	1.44599e-35	2.7312e-34
MFF	-0.693678	1.52497e-35	2.87713e-34
EIF2B5	-0.539267	1.55594e-35	2.93225e-34
CHD8	-0.806119	1.6083e-35	3.02752e-34
GSTCD	-0.880752	1.61078e-35	3.02878e-34
COPB2	-0.799659	1.66683e-35	3.13064e-34
IP6K1	-0.742394	1.70861e-35	3.20551e-34
POLD3	-0.921266	1.82923e-35	3.42797e-34
ZNF710	-1.22236	1.91051e-35	3.57628e-34
LARP1	-0.861353	1.99504e-35	3.73032e-34
DHX57	-0.703903	2.0003e-35	3.73597e-34
PPP1R8	-0.704622	2.06159e-35	3.84615e-34
GPN1	-0.671878	2.07105e-35	3.8595e-34
TEFM	-0.65518	2.09386e-35	3.89766e-34
USP48	-0.720208	2.17003e-35	4.03496e-34
PANK2	-0.595862	2.32048e-35	4.3099e-34
UTP6	-0.6629	2.37746e-35	4.41084e-34
KLHL18	-0.605985	2.38266e-35	4.41559e-34
GORASP2	-0.712638	2.43073e-35	4.49968e-34
NUP160	-0.953845	2.49605e-35	4.61549e-34
STX3	-1.23747	2.58541e-35	4.77543e-34
DNMT3A	-1.0543	2.64983e-35	4.88902e-34
EHBP1L1	-0.987739	2.66811e-35	4.91732e-34
SEPHS1	-0.675525	2.67136e-35	4.9179e-34
FBXO45	-0.713425	2.68057e-35	4.92942e-34
PAPSS1	-1.04487	2.70461e-35	4.96816e-34
DHX8	-0.715203	2.71043e-35	4.97339e-34
EIF2B1	-0.580441	2.79916e-35	5.13056e-34
MGAT4A	-0.980406	2.8223e-35	5.16732e-34
PRRC2C	-1.03538	2.83288e-35	5.18102e-34
RPE	-0.758315	2.89233e-35	5.28396e-34
PWWP2A	-0.681311	2.91231e-35	5.31464e-34
CBFB	-0.93699	3.01506e-35	5.49615e-34
E2F8	-1.26611	3.06823e-35	5.58699e-34
EPB41L2	-1.22214	3.1635e-35	5.7542e-34
RRM1	-0.982493	3.17943e-35	5.77688e-34
RAB10	-0.910435	3.18471e-35	5.7802e-34
KLC2	-1.00384	3.2248e-35	5.84661e-34
BUB3	-0.69965	3.32378e-35	6.01953e-34
E2F4	-0.808474	3.34109e-35	6.04433e-34
MED1	-0.865684	3.39096e-35	6.12793e-34
SLC39A6	-1.17685	3.56816e-35	6.44118e-34
CDC42	-0.684972	3.65135e-35	6.58425e-34
TACC3	-1.34398	3.71948e-35	6.69988e-34
SNRNP200	-0.906717	3.76892e-35	6.78162e-34
TRIP12	-0.764642	3.78076e-35	6.79561e-34
OSBPL3	-1.11544	3.88404e-35	6.97376e-34
PRPF40B	-0.648717	3.99972e-35	7.17375e-34
NDC80	-1.38307	4.05726e-35	7.26916e-34
SF3B1	-0.887383	4.09417e-35	7.32743e-34
CDC123	-0.730217	4.2262e-35	7.55563e-34
BCL10	-0.841141	4.3146e-35	7.70543e-34
GPATCH8	-0.996869	4.3817e-35	7.81692e-34
ZNF664	-0.982111	4.39253e-35	7.82789e-34
STK35	-0.916869	4.56348e-35	8.12386e-34
HSF2BP	-0.623061	4.63679e-35	8.2456e-34
RAD21	-1.02679	4.64555e-35	8.25239e-34
SGSH	-0.768487	4.70375e-35	8.34691e-34
OFD1	-0.854853	4.72981e-35	8.38426e-34
DAGLA	-1.31706	4.73959e-35	8.39269e-34
UXS1	-0.853998	4.75538e-35	8.41174e-34
METTL9	-0.928715	5.00873e-35	8.85052e-34
EHMT2	-0.94335	5.13429e-35	9.06281e-34
TRIP4	-0.623633	5.38384e-35	9.49328e-34
PRKCD	-1.13967	5.59581e-35	9.85664e-34
UBXN7	-0.855253	5.76129e-35	1.01373e-33
CCDC138	-0.777086	5.7673e-35	1.01373e-33
DNAAF5	-0.822274	5.97239e-35	1.04868e-33
USP24	-0.780814	6.02572e-35	1.05694e-33
CHML	-1.34722	6.1201e-35	1.07237e-33
DCAF12	-0.852367	6.16556e-35	1.07826e-33
WDR82	-0.849136	6.16664e-35	1.07826e-33
AP2A2	-0.591571	6.18955e-35	1.08113e-33
GCC2	-0.933533	6.31287e-35	1.10152e-33
LRRC41	-0.766312	6.4303e-35	1.12084e-33
PCGF3	-0.866715	6.49532e-35	1.131e-33
LHFPL2	-1.30154	6.80327e-35	1.18339e-33
BCL9L	-1.41019	6.8239e-35	1.18574e-33
ORC2	-0.837371	6.89968e-35	1.19752e-33
TTYH3	-1.46145	6.906e-35	1.19752e-33
MARS1	-0.753324	7.15579e-35	1.23955e-33
TXLNG	-0.848529	7.30075e-35	1.26335e-33
NUP93	-0.770206	7.38018e-35	1.27462e-33
RAB3GAP1	-0.776867	7.38116e-35	1.27462e-33
TAF6	-1.16426	7.39122e-35	1.27504e-33
USP46	-0.763879	7.42251e-35	1.27912e-33
ZNF169	-0.476082	7.64265e-35	1.3157e-33
SMARCAL1	-0.66806	7.67041e-35	1.31912e-33
WASF1	-1.21702	7.78482e-35	1.33742e-33
WDR33	-0.560985	7.87158e-35	1.35094e-33
LCOR	-0.908409	7.94698e-35	1.36248e-33
CCDC66	-0.60334	8.39808e-35	1.43834e-33
MAPK7	-0.820164	8.5245e-35	1.4585e-33
SPIN1	-1.17417	8.62073e-35	1.47346e-33
C2orf49	-0.687056	8.66039e-35	1.47872e-33
SACS	-0.7831	8.85284e-35	1.51004e-33
COA1	-0.655403	9.84978e-35	1.67838e-33
BCORL1	-1.07789	1.0792e-34	1.83706e-33
COPB1	-0.912612	1.08663e-34	1.84783e-33
TTC27	-0.660841	1.12737e-34	1.91516e-33
FANCL	-0.802967	1.13615e-34	1.92811e-33
NIF3L1	-0.692762	1.15355e-34	1.95565e-33
SUDS3	-0.790987	1.18157e-34	2.00112e-33
E2F2	-0.990542	1.19077e-34	2.01468e-33
POMT2	-0.698233	1.23222e-34	2.08268e-33
SSH2	-0.710025	1.29085e-34	2.17958e-33
TRRAP	-0.956654	1.36354e-34	2.3e-33
ZNF267	-0.751705	1.37657e-34	2.31963e-33
YKT6	-0.822331	1.38522e-34	2.33185e-33
TPR	-1.02122	1.39936e-34	2.35328e-33
CEP89	-0.716828	1.42755e-34	2.39829e-33
PIF1	-1.06658	1.45438e-34	2.44091e-33
AGPS	-0.860486	1.4764e-34	2.47537e-33
TBC1D10B	-0.75633	1.48015e-34	2.47918e-33
TMEM120B	-0.632383	1.48832e-34	2.49037e-33
MBOAT7	-0.787293	1.50918e-34	2.52274e-33
PURB	-0.742851	1.51707e-34	2.5334e-33
BET1L	-0.618847	1.58122e-34	2.63788e-33
TIPIN	-0.778344	1.64057e-34	2.73417e-33
CAPN10	-0.682323	1.6554e-34	2.75614e-33
SMAD5	-1.01856	1.69442e-34	2.81552e-33
C12orf4	-0.660613	1.69443e-34	2.81552e-33
ZNF337	-0.693022	1.72459e-34	2.86278e-33
ZSWIM1	-0.718195	1.75239e-34	2.90605e-33
OIP5	-1.3112	1.82209e-34	3.01864e-33
GIT2	-0.757689	1.82797e-34	3.02539e-33
KCTD5	-0.830447	1.84116e-34	3.0442e-33
DNAJC7	-0.58512	2.01956e-34	3.33586e-33
RAB7A	-0.632764	2.02481e-34	3.34124e-33
NANP	-0.681512	2.04088e-34	3.36444e-33
ZNF146	-0.88902	2.06927e-34	3.40787e-33
SP3	-0.971671	2.09567e-34	3.44796e-33
HNRNPDL	-0.770362	2.21727e-34	3.64136e-33
TRAFD1	-0.848436	2.21758e-34	3.64136e-33
MIS18A	-1.01964	2.22237e-34	3.64564e-33
UHRF2	-0.828001	2.23605e-34	3.66449e-33
ZNF37A	-0.834772	2.35382e-34	3.85372e-33
PLIN3	-0.990521	2.4032e-34	3.93072e-33
PSMD1	-0.598296	2.43699e-34	3.98209e-33
CDC42SE1	-1.0273	2.44102e-34	3.98478e-33
CCT8	-0.728106	2.67772e-34	4.3669e-33
RELT	-0.816029	2.69274e-34	4.38712e-33
NAA35	-0.791722	2.70198e-34	4.39788e-33
RNF114	-0.612071	2.75764e-34	4.48411e-33
ANKRD49	-0.701997	2.76624e-34	4.49372e-33
LDB1	-1.08232	2.78605e-34	4.52152e-33
STX7	-0.832339	2.82186e-34	4.57519e-33
DNA2	-0.954959	2.83864e-34	4.59793e-33
PRPF38A	-0.764341	2.90682e-34	4.70235e-33
MAPKBP1	-0.688839	2.90873e-34	4.70235e-33
FNBP1L	-1.15759	2.94073e-34	4.74949e-33
ARIH2	-0.699365	3.02556e-34	4.88178e-33
RNF4	-0.832385	3.13458e-34	5.05281e-33
ZNF708	-0.766207	3.14755e-34	5.06883e-33
MGA	-0.749761	3.20612e-34	5.15818e-33
TPGS2	-0.991705	3.2625e-34	5.24385e-33
CEP95	-0.797919	3.28628e-34	5.27698e-33
MRGBP	-0.72329	3.33754e-34	5.35416e-33
C12orf65	-0.586712	3.37211e-34	5.40443e-33
DARS1	-0.859203	3.38692e-34	5.42297e-33
JARID2	-0.879942	3.43975e-34	5.50229e-33
ILF2	-0.823019	3.48557e-34	5.57025e-33
MKNK1	-0.657542	3.49655e-34	5.58245e-33
RAVER1	-1.19557	3.51486e-34	5.60634e-33
EYA3	-0.745011	3.55249e-34	5.66096e-33
CRTC3	-0.825127	3.57143e-34	5.68572e-33
IPO7	-0.957523	3.67786e-34	5.84958e-33
PSMD11	-0.649801	3.69264e-34	5.86751e-33
NAE1	-0.685827	3.70213e-34	5.877e-33
SELENON	-1.00048	3.75366e-34	5.95315e-33
BRCA2	-0.650481	3.85997e-34	6.11594e-33
EPRS1	-0.885641	3.91316e-34	6.19435e-33
ZBTB2	-0.815414	3.95599e-34	6.25623e-33
POLA2	-0.890168	3.97738e-34	6.2841e-33
GZF1	-0.639666	4.00998e-34	6.32963e-33
SGTB	-0.749334	4.12709e-34	6.50834e-33
POM121C	-0.734412	4.19257e-34	6.60536e-33
SF3B4	-0.916268	4.26282e-34	6.70972e-33
RASA2	-0.83852	4.32841e-34	6.80656e-33
FUS	-0.887272	4.63762e-34	7.28594e-33
SEPTIN8	-0.959179	4.67003e-34	7.32998e-33
PCLAF	-1.36376	4.78166e-34	7.49815e-33
TTLL4	-1.32802	4.95394e-34	7.7605e-33
FAM117B	-1.05448	4.95825e-34	7.7605e-33
SRCAP	-0.879744	5.01838e-34	7.84075e-33
POP1	-0.718768	5.01891e-34	7.84075e-33
PRKAG1	-0.59724	5.05527e-34	7.89019e-33
FAM72A	-0.515949	5.16285e-34	8.05059e-33
TRAF3	-0.857703	5.25579e-34	8.18786e-33
FAM168B	-0.957777	5.41976e-34	8.43545e-33
HMGN4	-1.26826	5.43376e-34	8.44937e-33
ADCY6	-0.966286	5.68532e-34	8.83232e-33
TRAF5	-0.988679	5.8096e-34	9.01702e-33
EPS15L1	-0.760376	5.97846e-34	9.2705e-33
MTFR2	-1.05006	6.18683e-34	9.58472e-33
PAPOLG	-0.655955	6.22067e-34	9.62822e-33
SLC41A3	-0.722594	6.31235e-34	9.76107e-33
UBXN2A	-0.710701	6.64294e-34	1.02599e-32
UBE2T	-1.39873	6.6514e-34	1.02599e-32
HMGA1	-1.4752	6.65334e-34	1.02599e-32
SMG5	-0.92331	6.83079e-34	1.05238e-32
LEMD2	-0.731814	6.94436e-34	1.0689e-32
TUBB	-0.986474	7.10252e-34	1.09223e-32
KRR1	-0.67659	7.13152e-34	1.09568e-32
CKAP4	-1.14032	7.24194e-34	1.11163e-32
G6PD	-1.78123	7.70822e-34	1.18212e-32
SF3B2	-0.584542	7.74658e-34	1.18691e-32
ZNF292	-1.0361	7.83531e-34	1.19941e-32
RPRD1A	-0.831408	7.95989e-34	1.21736e-32
PRDM10	-0.690774	8.02151e-34	1.22566e-32
ZNF445	-0.786973	8.59201e-34	1.31162e-32
NOL10	-0.585954	8.59974e-34	1.31162e-32
CLSTN1	-1.42238	8.81656e-34	1.34346e-32
GNPDA2	-0.775694	9.00874e-34	1.3715e-32
YTHDC1	-0.749172	9.05555e-34	1.37737e-32
HMGB2	-1.25309	9.27186e-34	1.40899e-32
CLCN2	-0.904373	9.30571e-34	1.41285e-32
AP5Z1	-0.764745	9.31594e-34	1.41312e-32
SLC26A2	-0.931795	9.63153e-34	1.45966e-32
CCT5	-0.913432	9.7331e-34	1.47372e-32
TUBG1	-0.953956	1.03288e-33	1.56251e-32
PAK4	-0.938031	1.04961e-33	1.58638e-32
GTF2H3	-0.882756	1.085e-33	1.63839e-32
SLF1	-0.641532	1.08731e-33	1.64038e-32
LRPPRC	-0.766789	1.0961e-33	1.6507e-32
CAMSAP1	-0.799856	1.09612e-33	1.6507e-32
PRR14L	-0.833004	1.1048e-33	1.66227e-32
IFNGR2	-1.02671	1.12894e-33	1.69706e-32
GNA13	-0.935066	1.13305e-33	1.70172e-32
PPM1G	-0.689137	1.1532e-33	1.73042e-32
YWHAH	-0.834103	1.15489e-33	1.73141e-32
MOB4	-0.667213	1.15999e-33	1.73749e-32
XPNPEP1	-0.688743	1.16243e-33	1.73958e-32
ZNF623	-0.911111	1.16571e-33	1.74294e-32
GPATCH2	-0.736567	1.17056e-33	1.74863e-32
DCTN5	-0.718004	1.20739e-33	1.80202e-32
KCMF1	-0.546279	1.21254e-33	1.8081e-32
ZNF639	-0.678093	1.23808e-33	1.84455e-32
EXOSC3	-0.684745	1.28584e-33	1.91399e-32
APPL1	-0.837121	1.30041e-33	1.93395e-32
ENAH	-1.2789	1.34721e-33	2.00178e-32
TMEM44	-0.939339	1.38813e-33	2.06075e-32
BMPR1A	-0.729031	1.41012e-33	2.09058e-32
PLEKHG2	-1.00628	1.41073e-33	2.09058e-32
RBBP8	-1.09119	1.42743e-33	2.11346e-32
ZRANB2	-0.85388	1.44219e-33	2.13342e-32
VPS11	-0.719965	1.45612e-33	2.15212e-32
ZNF514	-0.850059	1.50785e-33	2.22661e-32
SKA1	-1.46848	1.52047e-33	2.24327e-32
CCDC88A	-0.993893	1.52674e-33	2.24995e-32
AVL9	-0.787611	1.52769e-33	2.24995e-32
COMMD8	-0.908018	1.58886e-33	2.33798e-32
ZFX	-0.968289	1.62456e-33	2.3884e-32
DHX35	-0.762055	1.6497e-33	2.42323e-32
UCK2	-1.00791	1.68201e-33	2.46853e-32
TTC26	-0.778754	1.69238e-33	2.48157e-32
ANKRD26	-0.719486	1.69442e-33	2.48238e-32
MRTFA	-0.768215	1.75064e-33	2.5625e-32
MEMO1	-0.456455	1.82736e-33	2.67246e-32
ARCN1	-0.778955	1.86213e-33	2.72093e-32
PBK	-1.52857	1.91433e-33	2.79475e-32
NSMAF	-0.944488	1.96491e-33	2.86609e-32
MARCHF7	-0.777096	1.97455e-33	2.87765e-32
DCP2	-0.733845	1.99947e-33	2.91143e-32
ZC3H4	-0.722169	2.04988e-33	2.98223e-32
RBM5	-0.694855	2.0706e-33	3.00976e-32
TMEM39A	-0.776514	2.08979e-33	3.035e-32
RPS6KA4	-0.720946	2.09779e-33	3.04398e-32
SYNRG	-0.726201	2.1308e-33	3.08919e-32
ZNF26	-0.548938	2.17634e-33	3.15156e-32
PIAS3	-1.07804	2.17758e-33	3.15156e-32
CEP290	-0.780342	2.18383e-33	3.15786e-32
EFCAB7	-0.660595	2.22804e-33	3.21901e-32
XRCC3	-0.83828	2.29556e-33	3.3137e-32
ZDHHC17	-0.80413	2.31494e-33	3.33878e-32
PALB2	-0.810692	2.42145e-33	3.48807e-32
TCF19	-1.4973	2.42262e-33	3.48807e-32
METAP2	-0.677276	2.48685e-33	3.57747e-32
CLTC	-0.814912	2.49086e-33	3.58016e-32
COG1	-0.711621	2.56777e-33	3.68753e-32
GON4L	-0.833961	2.59727e-33	3.72669e-32
STRADA	-0.6807	2.60066e-33	3.72836e-32
LSG1	-0.693928	2.62618e-33	3.76172e-32
CEP162	-0.729205	2.63101e-33	3.76378e-32
ZNF567	-0.694948	2.63213e-33	3.76378e-32
TMEM87B	-0.931659	2.78548e-33	3.97966e-32
UBN1	-0.795781	2.87794e-33	4.10826e-32
PXN	-0.743126	2.95212e-33	4.21055e-32
ZNF318	-0.934675	3.04724e-33	4.34252e-32
SEH1L	-0.631425	3.09802e-33	4.41112e-32
PDCD10	-0.789144	3.13015e-33	4.45307e-32
SINHCAF	-1.32509	3.21403e-33	4.56851e-32
PFAS	-0.893596	3.34249e-33	4.74708e-32
SMC3	-1.16419	3.4751e-33	4.93122e-32
CDC23	-0.765915	3.53899e-33	5.01763e-32
ASF1B	-1.55593	3.58364e-33	5.07661e-32
BCLAF1	-0.733622	3.6221e-33	5.12675e-32
AZI2	-0.882201	3.65936e-33	5.17511e-32
WAPL	-0.778162	3.66245e-33	5.17511e-32
SRPK2	-0.926018	3.68237e-33	5.19886e-32
SNRNP40	-0.742618	3.74265e-33	5.27951e-32
ZNF280C	-0.672494	3.75978e-33	5.29919e-32
PHF6	-0.887693	3.86852e-33	5.44787e-32
ZNF346	-0.593595	3.88192e-33	5.46214e-32
ANAPC4	-0.678004	3.92886e-33	5.52354e-32
BLOC1S3	-0.739672	3.94296e-33	5.5387e-32
RAB11A	-0.66022	3.981e-33	5.58744e-32
TRIM32	-0.8712	4.10917e-33	5.76248e-32
MAPK1	-0.935254	4.12619e-33	5.78151e-32
APAF1	-0.997794	4.16428e-33	5.82999e-32
ADPGK	-0.770747	4.26633e-33	5.96787e-32
XRCC5	-0.676983	4.36009e-33	6.09392e-32
BFAR	-0.626493	4.42597e-33	6.18083e-32
ZNF286A	-0.485022	4.56195e-33	6.36541e-32
RTN3	-0.690695	4.62156e-33	6.43957e-32
RUFY2	-0.690686	4.6228e-33	6.43957e-32
DGCR8	-0.698572	4.6523e-33	6.47526e-32
BAZ1B	-0.862408	4.66351e-33	6.48546e-32
DCTN2	-0.654646	4.74951e-33	6.59957e-32
SMAD2	-0.638966	4.98168e-33	6.91642e-32
RBPJ	-0.667573	4.99307e-33	6.92649e-32
MEX3A	-1.24986	5.07802e-33	7.03849e-32
TTLL5	-0.667704	5.27418e-33	7.30433e-32
WDCP	-0.681348	5.40061e-33	7.47323e-32
TTF1	-0.742145	5.44135e-33	7.52337e-32
DSCC1	-0.977651	5.54621e-33	7.66202e-32
HAUS5	-0.795488	5.62096e-33	7.75887e-32
RNF26	-0.847407	5.76006e-33	7.94432e-32
ZNF174	-0.616493	6.1348e-33	8.45419e-32
C15orf39	-1.08048	6.15308e-33	8.4724e-32
MDM1	-0.727543	6.21994e-33	8.55741e-32
LIG1	-0.965942	6.33734e-33	8.71176e-32
MEX3C	-0.953704	6.65665e-33	9.14145e-32
AP4M1	-0.735595	6.66086e-33	9.14145e-32
DYNC1I2	-1.01796	6.79564e-33	9.31878e-32
DDX20	-0.6618	6.91733e-33	9.47787e-32
VGLL4	-1.19002	6.95306e-33	9.51902e-32
ZNF738	-0.926329	7.09546e-33	9.70603e-32
CDC25A	-1.17901	7.1437e-33	9.76404e-32
FBH1	-0.843881	7.15882e-33	9.7767e-32
CDKAL1	-0.759519	7.22148e-33	9.85423e-32
NOL11	-0.690283	7.38512e-33	1.00693e-31
WDR76	-1.24839	7.62844e-33	1.03926e-31
CIAO1	-0.61619	7.65819e-33	1.04246e-31
CDK19	-0.993909	7.78164e-33	1.0584e-31
BTN2A1	-0.931509	7.81259e-33	1.06175e-31
FARSB	-0.693597	7.95856e-33	1.08071e-31
CACUL1	-0.662195	7.96754e-33	1.08105e-31
RBSN	-0.621307	7.99277e-33	1.08359e-31
ZNF131	-0.700944	8.00034e-33	1.08374e-31
BLM	-0.959307	8.41888e-33	1.13951e-31
DUSP11	-0.674979	8.44654e-33	1.14233e-31
AAGAB	-0.643918	8.70673e-33	1.17657e-31
HAT1	-0.750574	8.80835e-33	1.18934e-31
B3GALNT1	-1.05212	8.88549e-33	1.19879e-31
SLC35A2	-0.72921	9.0602e-33	1.22137e-31
UEVLD	-0.781995	9.06864e-33	1.22153e-31
FAM131A	-0.774061	9.1255e-33	1.22819e-31
CIC	-0.871662	9.17454e-33	1.2338e-31
MPV17	-0.857491	9.35721e-33	1.25736e-31
STK24	-1.14373	9.37318e-33	1.25849e-31
STK11IP	-0.760764	9.46317e-33	1.26955e-31
ASPM	-1.40228	9.51966e-33	1.27552e-31
DHX30	-0.583444	9.52291e-33	1.27552e-31
POFUT2	-0.858751	9.59078e-33	1.28358e-31
VPS35	-0.825033	9.64131e-33	1.28931e-31
PPWD1	-0.707838	9.74082e-33	1.30158e-31
RFC3	-1.06857	9.80289e-33	1.30883e-31
DBNDD2	-0.816393	9.90263e-33	1.32109e-31
FAM13B	-0.859359	9.98253e-33	1.33069e-31
ACTR2	-0.911283	1.00731e-32	1.34168e-31
RSRC1	-0.771605	1.03917e-32	1.38303e-31
DHX34	-0.79787	1.0415e-32	1.38502e-31
DDX54	-0.563994	1.04766e-32	1.3921e-31
SPAST	-0.716075	1.04893e-32	1.39269e-31
GNAI3	-0.652677	1.06015e-32	1.40647e-31
CCDC14	-1.00582	1.06584e-32	1.41289e-31
MAFG	-1.08746	1.06728e-32	1.41365e-31
CLASP2	-0.762464	1.0681e-32	1.41365e-31
KIAA1522	-1.19226	1.07622e-32	1.42327e-31
CABIN1	-0.844558	1.07809e-32	1.42462e-31
ZNF736	-0.7739	1.09432e-32	1.44492e-31
SPICE1	-0.769808	1.10792e-32	1.46172e-31
CEP83	-0.616608	1.15046e-32	1.51647e-31
TIMELESS	-1.00968	1.15123e-32	1.51647e-31
RRAGC	-0.742837	1.19031e-32	1.56671e-31
UBA3	-0.701885	1.19931e-32	1.57732e-31
FOCAD	-0.766939	1.21629e-32	1.59839e-31
DIMT1	-0.70553	1.22878e-32	1.61354e-31
PAPOLA	-0.724004	1.23926e-32	1.62602e-31
SCAMP4	-0.765558	1.26518e-32	1.65872e-31
RIOK1	-0.82574	1.30828e-32	1.71388e-31
PIGC	-0.801597	1.35038e-32	1.76766e-31
SRRD	-0.681076	1.36942e-32	1.79117e-31
SZRD1	-0.703009	1.40052e-32	1.83042e-31
FAM102B	-0.988836	1.40494e-32	1.83476e-31
SEPTIN9	-0.794981	1.43371e-32	1.87087e-31
COPG1	-0.645739	1.43811e-32	1.87515e-31
FBRS	-0.685594	1.47093e-32	1.91645e-31
MORC2	-0.738164	1.49749e-32	1.94954e-31
CNOT10	-0.64904	1.51825e-32	1.97502e-31
CASP8AP2	-0.905944	1.52242e-32	1.97891e-31
ATF2	-0.852796	1.55166e-32	2.01536e-31
DCLRE1C	-0.756405	1.56636e-32	2.03286e-31
LLGL1	-0.963956	1.61878e-32	2.09926e-31
RGP1	-0.807596	1.67154e-32	2.16601e-31
RNF38	-0.961958	1.74444e-32	2.25872e-31
GMFB	-0.832487	1.76937e-32	2.28922e-31
DDX18	-0.78645	1.79824e-32	2.32478e-31
PRMT2	-0.866599	1.82475e-32	2.35723e-31
ZNF532	-1.10745	1.83391e-32	2.36724e-31
DZIP1L	-0.92793	1.84493e-32	2.37962e-31
ANP32E	-0.906727	1.85912e-32	2.39607e-31
USP36	-0.760781	1.88216e-32	2.4239e-31
TRIM33	-0.830025	1.89801e-32	2.44243e-31
TULP3	-0.948551	1.90076e-32	2.44408e-31
LBR	-0.993245	1.90804e-32	2.45156e-31
SIN3B	-0.780424	1.91527e-32	2.45896e-31
SH3GLB1	-0.786977	1.92257e-32	2.46644e-31
ZCCHC17	-0.692069	1.9404e-32	2.4874e-31
TONSL	-1.02213	1.95169e-32	2.49996e-31
RAB28	-0.778276	2.00935e-32	2.57184e-31
POLG2	-0.780003	2.03206e-32	2.59892e-31
DMTF1	-0.894987	2.03984e-32	2.60688e-31
MED14	-0.929369	2.064e-32	2.63574e-31
GGNBP2	-0.672537	2.09842e-32	2.67765e-31
METTL3	-0.787669	2.15818e-32	2.7518e-31
PSMD14	-0.711938	2.19958e-32	2.80245e-31
ZNF646	-0.740671	2.20368e-32	2.80554e-31
TROAP	-1.52923	2.24225e-32	2.85138e-31
SLC35E3	-0.617295	2.2431e-32	2.85138e-31
ZNF101	-0.631073	2.25953e-32	2.87008e-31
RFXAP	-0.758717	2.29815e-32	2.91692e-31
ZBTB11	-0.748718	2.31643e-32	2.9379e-31
MLLT6	-0.955042	2.37406e-32	3.0087e-31
CCNA2	-1.60463	2.522e-32	3.19377e-31
TMEM131	-0.783886	2.56805e-32	3.24962e-31
RFX3	-0.603655	2.58647e-32	3.27021e-31
ZNF384	-1.01333	2.58823e-32	3.27021e-31
CUL4B	-0.790556	2.62811e-32	3.31809e-31
METAP1	-0.814496	2.65351e-32	3.34763e-31
SWAP70	-0.991704	2.67386e-32	3.37075e-31
WASHC2C	-0.724505	2.6803e-32	3.37633e-31
HACE1	-0.71177	2.72362e-32	3.42832e-31
STRN	-0.807596	2.73965e-32	3.4459e-31
FBXO30	-0.802138	2.74225e-32	3.44657e-31
ZNHIT6	-0.731105	2.75472e-32	3.45964e-31
TEAD3	-0.911369	2.78639e-32	3.49679e-31
NELFB	-0.673374	2.80456e-32	3.51696e-31
EXOC1	-0.807401	2.80789e-32	3.5185e-31
MED20	-0.792603	2.86428e-32	3.58595e-31
SPRED1	-1.14975	2.86602e-32	3.58595e-31
LUZP1	-0.815696	2.88358e-32	3.60523e-31
EPC2	-0.848885	2.97492e-32	3.71665e-31
MLLT10	-0.963634	3.08284e-32	3.84861e-31
FXR1	-0.669699	3.10575e-32	3.87431e-31
SETDB1	-0.857047	3.11944e-32	3.88849e-31
PKMYT1	-1.18941	3.19647e-32	3.98154e-31
TGS1	-0.854738	3.20575e-32	3.99012e-31
CCNT1	-0.753566	3.25069e-32	4.04305e-31
IPO9	-0.820863	3.3866e-32	4.20895e-31
DCUN1D5	-0.79755	3.41899e-32	4.24605e-31
IFT80	-0.937313	3.50616e-32	4.35107e-31
ZCCHC4	-0.65777	3.59366e-32	4.45394e-31
USP21	-0.867218	3.59438e-32	4.45394e-31
FGD6	-1.14145	3.65056e-32	4.52021e-31
PARD3	-0.802325	3.77466e-32	4.67041e-31
ZNF260	-0.812674	3.80297e-32	4.70196e-31
CDK2AP1	-1.06016	4.09237e-32	5.05603e-31
ZNF133	-0.723738	4.20163e-32	5.18719e-31
PTBP2	-0.733982	4.3819e-32	5.40574e-31
PUM1	-0.800487	4.44069e-32	5.47423e-31
MADD	-0.720449	4.45214e-32	5.4843e-31
POLE3	-0.728359	4.46221e-32	5.49266e-31
ARAP1	-0.761214	4.51994e-32	5.55963e-31
TRAK2	-0.900031	4.59171e-32	5.64375e-31
DPP8	-0.779867	4.63864e-32	5.69725e-31
RCE1	-0.77609	4.68738e-32	5.75288e-31
CEP152	-0.65423	4.74614e-32	5.81765e-31
NOP58	-0.7289	4.74712e-32	5.81765e-31
HROB	-1.05981	4.75168e-32	5.81898e-31
ATG13	-0.522777	4.77989e-32	5.84925e-31
ICE1	-0.8839	4.89659e-32	5.98767e-31
ESCO1	-0.794622	4.9121e-32	6.00225e-31
PLCG1	-1.02298	4.93984e-32	6.03173e-31
PRPF19	-0.547407	4.97358e-32	6.06849e-31
TASP1	-0.818309	5.00918e-32	6.10747e-31
MBD6	-0.816673	5.09596e-32	6.20876e-31
ZMIZ2	-0.846412	5.2132e-32	6.34697e-31
RNF144A	-1.1339	5.22378e-32	6.35522e-31
PSPC1	-0.756762	5.24759e-32	6.37955e-31
SMARCB1	-0.815111	5.27002e-32	6.40216e-31
YTHDF2	-0.586002	5.27626e-32	6.40508e-31
BICD1	-0.731049	5.34785e-32	6.48727e-31
SEPTIN7	-0.806029	5.47078e-32	6.63158e-31
PTGES3	-0.617166	5.52579e-32	6.69341e-31
AP3B1	-0.762806	5.5384e-32	6.70384e-31
SNX6	-0.91688	5.5507e-32	6.71386e-31
NIPBL	-0.802897	5.61607e-32	6.78801e-31
PIGU	-0.775324	5.66542e-32	6.84271e-31
INTS2	-0.87987	5.68572e-32	6.86227e-31
ACTR8	-0.575871	5.95754e-32	7.18515e-31
CDC45	-1.33862	5.99409e-32	7.22036e-31
INO80D	-0.690912	5.99537e-32	7.22036e-31
NFRKB	-0.763117	6.22245e-32	7.48481e-31
PBRM1	-0.806627	6.22391e-32	7.48481e-31
RAPGEF1	-0.880522	6.28403e-32	7.55167e-31
STMN1	-1.30815	6.39709e-32	7.67825e-31
C10orf88	-0.649341	6.39854e-32	7.67825e-31
ZNF100	-0.703118	6.52303e-32	7.82203e-31
H2AX	-1.19457	6.55589e-32	7.85578e-31
ACTR6	-0.706224	6.59846e-32	7.90113e-31
ARPIN	-0.907203	6.70684e-32	8.02516e-31
STX16	-0.773192	6.80883e-32	8.14138e-31
ABL2	-0.795713	6.98561e-32	8.34291e-31
SLC39A10	-1.10722	6.98736e-32	8.34291e-31
SRSF7	-0.634994	7.04046e-32	8.40031e-31
ANKS1A	-0.904816	7.08567e-32	8.44823e-31
DLG5	-1.29869	7.22968e-32	8.61378e-31
FAM219B	-0.745239	7.24986e-32	8.63167e-31
KIF3A	-0.695761	7.34194e-32	8.73508e-31
YWHAZ	-1.02459	7.37658e-32	8.77005e-31
CGGBP1	-0.739447	7.58671e-32	9.01346e-31
SRP68	-0.637048	7.67841e-32	9.11593e-31
SYNCRIP	-0.719555	8.26569e-32	9.80619e-31
UBE2D2	-0.548554	8.34946e-32	9.89855e-31
MSL2	-0.709946	8.48246e-32	1.00491e-30
ZSCAN29	-0.771131	8.6281e-32	1.02144e-30
CDC20	-1.86584	8.94438e-32	1.05813e-30
MSL3	-0.60782	8.97835e-32	1.0614e-30
SUMO2	-0.675233	9.01351e-32	1.0648e-30
CALM2	-0.699762	9.04175e-32	1.06739e-30
METTL8	-0.578755	9.34785e-32	1.10274e-30
PACRGL	-0.656199	9.39538e-32	1.10757e-30
XRN2	-0.882323	9.71184e-32	1.14407e-30
PDCL3	-0.676196	9.81335e-32	1.15521e-30
BICD2	-0.776001	9.96736e-32	1.17251e-30
ESF1	-0.962613	1.03605e-31	1.21791e-30
TMEM69	-0.769868	1.04591e-31	1.22863e-30
PPP3CB	-0.656831	1.06628e-31	1.25168e-30
SLMAP	-0.793981	1.07046e-31	1.25571e-30
RUSC1	-1.01024	1.11617e-31	1.30841e-30
RAP1B	-0.656017	1.12221e-31	1.31372e-30
RCC1	-0.919864	1.12227e-31	1.31372e-30
DONSON	-0.955479	1.13032e-31	1.32222e-30
DCTN1	-0.71353	1.13744e-31	1.32961e-30
TYRO3	-1.39321	1.17242e-31	1.36954e-30
VPS54	-0.823818	1.17854e-31	1.37573e-30
SEC23IP	-0.773864	1.1794e-31	1.37577e-30
ZNF71	-0.824961	1.18629e-31	1.38285e-30
NVL	-0.745041	1.19078e-31	1.38711e-30
ARHGAP17	-0.70094	1.19295e-31	1.38838e-30
LARS1	-0.69243	1.19353e-31	1.38838e-30
ACYP1	-0.807084	1.23574e-31	1.43649e-30
AGO2	-0.889252	1.23978e-31	1.44017e-30
ARHGAP39	-0.915807	1.29453e-31	1.50274e-30
SLC30A5	-0.717368	1.31567e-31	1.52577e-30
BRD4	-0.72757	1.3162e-31	1.52577e-30
ATG7	-0.481844	1.31766e-31	1.52641e-30
HNRNPUL2	-0.646728	1.37073e-31	1.58678e-30
DUSP7	-0.767076	1.43609e-31	1.66129e-30
NSD3	-0.93093	1.4467e-31	1.67241e-30
POLR3A	-0.637205	1.45834e-31	1.68471e-30
CTBP1	-0.627893	1.47796e-31	1.70619e-30
AP3M1	-0.784816	1.49512e-31	1.7248e-30
FKBP15	-0.70268	1.4966e-31	1.72532e-30
PLEKHA8	-0.675493	1.50415e-31	1.73283e-30
ORC4	-0.632507	1.51684e-31	1.74625e-30
NARS1	-0.824578	1.53692e-31	1.76814e-30
SPNS1	-0.726714	1.54434e-31	1.77545e-30
SPATS2L	-0.880175	1.55854e-31	1.79055e-30
SP4	-0.791689	1.64058e-31	1.88351e-30
POLR2B	-0.981949	1.6505e-31	1.89361e-30
HMMR	-1.36491	1.65327e-31	1.89548e-30
ATAT1	-0.922102	1.67143e-31	1.91499e-30
SENP5	-0.61483	1.71029e-31	1.95816e-30
ZNF526	-0.563721	1.76032e-31	2.01407e-30
PRMT1	-0.833524	1.78757e-31	2.04385e-30
ATN1	-0.997006	1.81579e-31	2.07469e-30
ARFGAP1	-0.670189	1.84115e-31	2.10223e-30
NKAPD1	-0.68039	1.9334e-31	2.20606e-30
ZNF12	-0.825951	1.95847e-31	2.23314e-30
UBLCP1	-0.713947	1.98374e-31	2.26041e-30
SLC27A5	2.22002	2.05155e-31	2.33609e-30
SERAC1	-0.655456	2.0884e-31	2.37643e-30
MKRN2	-0.704035	2.34749e-31	2.66943e-30
RTF1	-0.653186	2.43782e-31	2.77027e-30
PRKDC	-1.05392	2.45887e-31	2.79228e-30
HP1BP3	-0.865098	2.51342e-31	2.8523e-30
CEP41	-0.57338	2.59587e-31	2.94387e-30
DESI2	-0.907905	2.61317e-31	2.96147e-30
GPRIN1	-1.16584	2.67079e-31	3.02472e-30
FBXW8	-0.748655	2.73103e-31	3.09085e-30
RTKN2	-0.66573	2.76263e-31	3.1245e-30
ADAM9	-1.44298	2.82757e-31	3.19579e-30
MICALL1	-0.781495	2.93067e-31	3.31008e-30
CHAF1A	-0.981528	2.95292e-31	3.33295e-30
PABIR2	-0.96043	2.97564e-31	3.35633e-30
PLEKHM2	-0.749462	3.07011e-31	3.46055e-30
SPTLC1	-1.08866	3.08959e-31	3.48016e-30
RASSF1	-0.652261	3.10454e-31	3.49464e-30
ZNF740	-0.72566	3.16203e-31	3.55488e-30
ZNF28	-1.30002	3.16231e-31	3.55488e-30
AAAS	-0.569951	3.19121e-31	3.58497e-30
PSMD2	-0.686367	3.26419e-31	3.66449e-30
LPCAT1	-1.40898	3.30639e-31	3.70937e-30
COPZ1	-0.511954	3.36865e-31	3.77668e-30
PLCB1	-1.14353	3.46967e-31	3.88733e-30
ZFYVE16	-0.730513	3.48704e-31	3.90418e-30
FAM199X	-0.828672	3.50923e-31	3.92639e-30
ATF7	-0.785816	3.52371e-31	3.93995e-30
PPP1R37	-0.862833	3.57557e-31	3.99527e-30
ASB6	-0.658859	3.59857e-31	4.01828e-30
MNT	-0.677776	3.64237e-31	4.06271e-30
BOD1	-0.666982	3.64321e-31	4.06271e-30
HELZ	-0.872029	3.68042e-31	4.10146e-30
DDB1	-0.621892	3.70277e-31	4.12362e-30
FTSJ1	-0.673922	3.71776e-31	4.13755e-30
FBXO46	-0.876283	3.75083e-31	4.1692e-30
NR2C2	-0.995584	3.75118e-31	4.1692e-30
KTI12	-0.616083	3.7554e-31	4.17111e-30
BRIX1	-0.727536	3.96566e-31	4.40173e-30
UBR5	-0.899171	4.02356e-31	4.46303e-30
TRIM28	-0.819958	4.05504e-31	4.49496e-30
TCF20	-0.887154	4.07667e-31	4.51595e-30
STT3A	-0.745094	4.19794e-31	4.6472e-30
KLHL42	-0.889002	4.2343e-31	4.68435e-30
PEA15	-0.907903	4.26344e-31	4.71347e-30
ZNF611	-0.864164	4.29585e-31	4.74616e-30
SH3PXD2B	-0.996829	4.31323e-31	4.76221e-30
SUPT6H	-0.578206	4.36305e-31	4.81404e-30
PDS5A	-0.809281	4.37456e-31	4.82086e-30
GYG1	-0.830456	4.37499e-31	4.82086e-30
TRIM45	-1.085	4.47517e-31	4.928e-30
XRCC1	-0.730738	4.4826e-31	4.93293e-30
HSPA13	-0.975759	4.51443e-31	4.96469e-30
BCL7A	-0.90656	4.52576e-31	4.97387e-30
CDCA7L	-1.32879	4.58551e-31	5.03622e-30
LAMC1	-1.29227	4.60622e-31	5.05566e-30
MCMBP	-0.770128	4.61044e-31	5.05696e-30
ZNF213	-0.889291	4.67104e-31	5.12007e-30
NFE2L3	-1.32439	4.77806e-31	5.23395e-30
ZNF234	-0.737609	4.80246e-31	5.25723e-30
TFAM	-0.763671	4.80612e-31	5.25779e-30
NIPA2	-0.973417	4.85996e-31	5.31322e-30
NOP56	-0.880581	4.89448e-31	5.34746e-30
SEC22C	-0.645464	5.01303e-31	5.47341e-30
ZNF550	-0.983528	5.05628e-31	5.51702e-30
ABI1	-0.793899	5.23444e-31	5.70769e-30
RFC5	-0.877042	5.2588e-31	5.72884e-30
SPATA2	-0.651556	5.26069e-31	5.72884e-30
RHOT1	-0.77081	5.26471e-31	5.72948e-30
ZDHHC13	-1.03813	5.38718e-31	5.85895e-30
EIF4E	-0.582543	5.41002e-31	5.87997e-30
CSPP1	-1.017	5.42229e-31	5.88947e-30
SMS	-0.772425	5.58169e-31	6.05867e-30
OSBPL2	-0.566063	5.67257e-31	6.15332e-30
UBE3B	-0.673512	5.85352e-31	6.34549e-30
ESPL1	-1.23924	5.90225e-31	6.39416e-30
RPS6KC1	-0.816104	6.02363e-31	6.52144e-30
C1orf174	-0.679508	6.12201e-31	6.62366e-30
WDR12	-0.69005	6.1674e-31	6.66845e-30
TRMT10B	-0.673564	6.27849e-31	6.78418e-30
EXOC6	-0.693028	6.8485e-31	7.39532e-30
ENTPD6	-0.805321	7.09521e-31	7.65678e-30
ARHGAP19	-0.704409	7.11841e-31	7.67686e-30
ZNF283	-0.596625	7.12835e-31	7.68262e-30
USP37	-0.745267	7.22884e-31	7.78591e-30
EXOSC10	-0.675131	7.28016e-31	7.83613e-30
SETD1B	-0.751465	7.35843e-31	7.91528e-30
TMEM168	-0.839925	7.37139e-31	7.92413e-30
CD276	-0.887013	7.50056e-31	8.0578e-30
TDP1	-0.662066	7.70999e-31	8.27747e-30
NOLC1	-0.78871	7.82199e-31	8.39232e-30
KDM3A	-0.842114	8.00265e-31	8.58065e-30
C17orf75	-0.650475	8.15806e-31	8.74168e-30
L3MBTL1	-0.565933	8.26005e-31	8.84529e-30
ZUP1	-0.708074	8.36344e-31	8.95027e-30
MRPL3	-0.703722	8.56158e-31	9.15646e-30
CLIC1	-1.1323	8.7821e-31	9.3863e-30
LIG3	-0.658521	8.82235e-31	9.42329e-30
PCYT1A	-0.608534	8.96846e-31	9.57323e-30
FAM189B	-0.938286	9.67971e-31	1.03258e-29
ESCO2	-0.770104	9.94301e-31	1.06e-29
MKKS	-0.83855	1.01086e-30	1.07696e-29
USP49	-0.568801	1.01256e-30	1.07809e-29
DMXL2	-0.835422	1.03237e-30	1.09848e-29
PTPRA	-0.726219	1.06638e-30	1.13395e-29
TIA1	-0.960548	1.07079e-30	1.13791e-29
NUP98	-0.749005	1.16e-30	1.23193e-29
POLR1G	-0.736295	1.19808e-30	1.27156e-29
CENPQ	-1.02632	1.203e-30	1.27597e-29
ZMIZ1	-1.11903	1.23963e-30	1.31399e-29
ARL1	-0.635616	1.26958e-30	1.34489e-29
SNX27	-0.903961	1.27583e-30	1.35065e-29
WDR53	-0.589725	1.34897e-30	1.42718e-29
ZNF543	-0.715715	1.38907e-30	1.46868e-29
MED23	-0.886343	1.4025e-30	1.48193e-29
ARHGAP18	-1.01829	1.47836e-30	1.5611e-29
NRBP1	-0.69109	1.51868e-30	1.60267e-29
HDAC1	-0.770512	1.56304e-30	1.64844e-29
ELAVL1	-0.606169	1.59061e-30	1.67646e-29
DEK	-1.06521	1.59177e-30	1.67663e-29
MSANTD2	-0.739325	1.59448e-30	1.67843e-29
WDSUB1	-0.849871	1.61852e-30	1.70266e-29
PRKD3	-0.825485	1.65044e-30	1.73514e-29
TRAIP	-1.04115	1.68903e-30	1.7746e-29
DDX50	-0.69135	1.70897e-30	1.79442e-29
PRPF4	-0.710666	1.74407e-30	1.83012e-29
SAFB2	-0.600944	1.75147e-30	1.83674e-29
MED13L	-0.900209	1.75876e-30	1.84322e-29
TBP	-0.712552	1.8022e-30	1.88756e-29
RTCA	-0.661264	1.8195e-30	1.9045e-29
MID1IP1	-1.17499	1.82586e-30	1.90995e-29
ARHGAP33	-0.939599	1.93463e-30	2.02247e-29
ZNF70	-0.642865	2.00694e-30	2.09675e-29
PNO1	-0.652933	2.06573e-30	2.15683e-29
SIN3A	-0.772506	2.11105e-30	2.20276e-29
TNPO2	-0.744782	2.12419e-30	2.21509e-29
RNF8	-0.686558	2.15353e-30	2.24429e-29
VRK1	-0.819905	2.225e-30	2.31732e-29
DDX10	-0.637908	2.33869e-30	2.43422e-29
SIPA1L3	-1.09559	2.44727e-30	2.54565e-29
WDR47	-0.797871	2.49425e-30	2.5929e-29
ZNF148	-0.756674	2.49872e-30	2.59452e-29
RBM10	-0.509804	2.49891e-30	2.59452e-29
THOC1	-0.684067	2.52881e-30	2.62394e-29
ZCCHC8	-0.717949	2.53802e-30	2.63186e-29
SEC61A1	-0.680334	2.55043e-30	2.64308e-29
YME1L1	-0.788179	2.58397e-30	2.67618e-29
OGT	-0.917611	2.63578e-30	2.72815e-29
ZNF236	-0.775801	2.64602e-30	2.73706e-29
RNF10	-0.54501	2.6693e-30	2.75943e-29
C5orf22	-0.758706	2.67811e-30	2.76683e-29
ARHGAP12	-0.92521	2.73617e-30	2.82506e-29
SMARCA5	-0.840395	2.7563e-30	2.84409e-29
NPAT	-0.761501	2.77517e-30	2.86179e-29
ZNF852	-0.471529	2.84e-30	2.92685e-29
FAM120AOS	-0.656127	2.86123e-30	2.94691e-29
PIMREG	-1.23165	2.92313e-30	3.0088e-29
TOP1	-0.875451	2.96185e-30	3.04678e-29
TRAF3IP1	-0.684155	3.01706e-30	3.10167e-29
CNPY4	-0.825684	3.12443e-30	3.21008e-29
WDR48	-0.603376	3.13407e-30	3.218e-29
HS2ST1	-0.765502	3.16054e-30	3.24319e-29
TUT4	-0.966969	3.16671e-30	3.24753e-29
LZTS2	-0.988031	3.17288e-30	3.25186e-29
MFSD10	-1.23467	3.22346e-30	3.30168e-29
ZNF2	-0.524314	3.2696e-30	3.34688e-29
INPP5F	-0.75207	3.30068e-30	3.37663e-29
TRIO	-0.944632	3.39889e-30	3.47497e-29
IST1	-0.681439	3.4476e-30	3.52262e-29
BCLAF3	-0.666291	3.48929e-30	3.56304e-29
ATIC	-0.761245	3.49995e-30	3.57174e-29
EXT2	-0.636912	3.65406e-30	3.72674e-29
ZNF713	-0.432589	3.68949e-30	3.76058e-29
DNAJC8	-0.606936	3.71395e-30	3.78321e-29
ATP1B3	-1.3107	3.72385e-30	3.79076e-29
RAP2B	-0.918246	3.7259e-30	3.79076e-29
ZNF461	-0.652145	3.80866e-30	3.8726e-29
PICALM	-0.769689	3.85392e-30	3.91624e-29
PIP5K1A	-1.03923	3.96159e-30	4.0232e-29
AAR2	-0.533535	3.97403e-30	4.03224e-29
DDX1	-0.630403	3.97531e-30	4.03224e-29
TCEANC2	-0.548586	4.03435e-30	4.08766e-29
AKAP10	-0.800815	4.03484e-30	4.08766e-29
YAE1	-0.643096	4.09444e-30	4.14552e-29
C1orf52	-0.619916	4.11078e-30	4.15956e-29
PSRC1	-1.13912	4.22094e-30	4.26844e-29
DDX31	-0.611027	4.22732e-30	4.2723e-29
OXSR1	-0.771556	4.29362e-30	4.33669e-29
JRK	-0.75663	4.32303e-30	4.36375e-29
DCAF17	-0.710113	4.39479e-30	4.43351e-29
SMC1A	-1.00408	4.51423e-30	4.54858e-29
THUMPD2	-0.704311	4.51429e-30	4.54858e-29
ETV3	-0.88771	4.52643e-30	4.55806e-29
SUPT5H	-0.612422	4.61138e-30	4.63893e-29
ZNF529	-0.731691	4.61229e-30	4.63893e-29
MCM7	-1.07924	4.63099e-30	4.65494e-29
ALMS1	-0.67885	4.68486e-30	4.70626e-29
CCDC112	-0.949325	4.7143e-30	4.73278e-29
IKBKE	-1.28745	4.71693e-30	4.73278e-29
USP22	-0.926155	4.73518e-30	4.74825e-29
SLC4A7	-0.92787	4.78507e-30	4.7954e-29
CTNNA1	-0.706622	4.87073e-30	4.87832e-29
DGKD	-0.777806	4.97584e-30	4.98061e-29
RPN2	-0.601665	5.02085e-30	5.02265e-29
HPS3	-0.962422	5.06049e-30	5.05928e-29
MAPK3	-0.706306	5.12887e-30	5.12458e-29
TMEM94	-0.719519	5.143e-30	5.13563e-29
CDK13	-0.779426	5.15811e-30	5.14764e-29
RPS6KB1	-0.693987	5.24993e-30	5.23615e-29
TIAL1	-0.555029	5.3026e-30	5.28553e-29
RAB1A	-0.691313	5.33532e-30	5.31497e-29
CTCF	-0.693184	5.38034e-30	5.35663e-29
ZC3H15	-0.684971	5.38469e-30	5.35776e-29
SSR1	-0.732507	5.40815e-30	5.3779e-29
CHMP4B	-0.657604	5.50917e-30	5.47511e-29
RRM2	-1.47731	5.55741e-30	5.51977e-29
DDHD1	-0.705006	5.59107e-30	5.5499e-29
ZDHHC7	-0.923138	5.61303e-30	5.5684e-29
ZNF468	-1.40171	5.68798e-30	5.6394e-29
KNSTRN	-0.852263	5.79391e-30	5.74102e-29
DFFB	-0.62507	5.80376e-30	5.74737e-29
PAXIP1	-0.739994	5.85754e-30	5.7972e-29
TMEM263	-0.772264	5.90262e-30	5.83836e-29
ZNF621	-0.794327	5.98237e-30	5.91374e-29
UNC119B	-1.03356	6.11516e-30	6.04143e-29
PA2G4	-0.616138	6.13617e-30	6.05861e-29
PAK1IP1	-0.772819	6.16241e-30	6.08092e-29
ZNF430	-0.728763	6.16971e-30	6.08454e-29
IPMK	-0.78544	6.32378e-30	6.2328e-29
ATM	-0.766127	6.36526e-30	6.26998e-29
TAF1A	-0.8086	6.40039e-30	6.30088e-29
RTF2	-0.5723	6.47309e-30	6.3687e-29
VBP1	-0.724159	6.48589e-30	6.37754e-29
ELF4	-1.2916	6.52595e-30	6.41316e-29
BRD3	-1.02096	6.54108e-30	6.42424e-29
MAP7D1	-0.880562	6.63052e-30	6.50826e-29
CHPF2	-0.744655	6.70886e-30	6.5813e-29
STXBP5	-0.844358	6.89432e-30	6.75926e-29
UNG	-0.7834	6.9524e-30	6.81222e-29
ZBTB45	-0.684961	6.96013e-30	6.81579e-29
ZCCHC3	-0.822378	7.08506e-30	6.93407e-29
ZNF354B	-0.717954	7.18767e-30	7.03037e-29
MYO9B	-0.692418	7.20653e-30	7.0447e-29
MAP3K4	-0.70596	7.21264e-30	7.04656e-29
CCDC32	-0.565361	7.25468e-30	7.08348e-29
SETD1A	-0.678779	7.67495e-30	7.48946e-29
AP4E1	-0.649932	7.69494e-30	7.50459e-29
NEMP2	-0.652991	7.74245e-30	7.54652e-29
RAB22A	-0.675683	7.77041e-30	7.56936e-29
ARPP19	-0.799228	8.11445e-30	7.89989e-29
ABCC1	-1.43915	8.2969e-30	8.07281e-29
METTL21A	-0.612076	8.42734e-30	8.19496e-29
RBM26	-0.712781	8.4452e-30	8.20755e-29
TNPO3	-0.746439	8.57667e-30	8.33048e-29
GPATCH1	-0.629399	8.60854e-30	8.35658e-29
NSF	-0.650254	8.64538e-30	8.38747e-29
AMMECR1L	-0.73431	8.78337e-30	8.5164e-29
USP28	-0.793993	8.79092e-30	8.51878e-29
CUL2	-0.708475	8.88821e-30	8.60807e-29
NUP58	-0.804589	9.0096e-30	8.72058e-29
MOSPD2	-0.827693	9.03212e-30	8.73732e-29
KMT2D	-0.922887	9.17546e-30	8.87085e-29
MTX2	-0.683389	9.24669e-30	8.93454e-29
LLPH	-0.457429	9.27048e-30	8.95236e-29
TMUB2	-0.697497	9.54019e-30	9.2075e-29
SP2	-0.833719	9.85707e-30	9.50784e-29
ZNF675	-0.747908	9.87896e-30	9.52345e-29
MTCH1	-0.7061	9.94253e-30	9.57922e-29
ZNF239	-1.22354	9.98071e-30	9.61046e-29
WTAP	-0.718051	1.00859e-29	9.70613e-29
CPSF3	-0.570805	1.02949e-29	9.89944e-29
GPN2	-0.583315	1.02986e-29	9.89944e-29
WDR73	-0.44292	1.03697e-29	9.96205e-29
VMA21	-0.768841	1.06342e-29	1.02103e-28
DUSP12	-0.749702	1.08477e-29	1.04093e-28
PUM2	-0.738958	1.08902e-29	1.04441e-28
TUBD1	-0.67787	1.10264e-29	1.05687e-28
ZNF182	-0.679136	1.11005e-29	1.06336e-28
UBE2V1	-0.73015	1.13822e-29	1.08972e-28
DDX11	-0.999209	1.15003e-29	1.1004e-28
MBD1	-0.67864	1.16697e-29	1.11596e-28
DPH2	-0.784136	1.16926e-29	1.11752e-28
USP33	-0.816388	1.19318e-29	1.13973e-28
SCLT1	-0.569028	1.19483e-29	1.14065e-28
TBC1D12	-0.723441	1.19887e-29	1.14385e-28
BIRC5	-1.64856	1.20241e-29	1.14608e-28
PIGG	-0.717464	1.20257e-29	1.14608e-28
KIF24	-0.765004	1.21182e-29	1.15424e-28
CDCA3	-1.16841	1.22261e-29	1.16384e-28
ATF1	-0.80901	1.251e-29	1.19019e-28
ARHGEF18	-0.870996	1.25335e-29	1.19176e-28
ZNF74	-0.729485	1.25529e-29	1.19292e-28
CCDC120	-0.818903	1.26332e-29	1.19987e-28
TMF1	-0.838764	1.2696e-29	1.20514e-28
NCBP1	-0.70541	1.27361e-29	1.20827e-28
SH3D21	-0.767565	1.32516e-29	1.25646e-28
TXNDC9	-0.608111	1.35223e-29	1.2814e-28
EEF1E1	-0.880272	1.36465e-29	1.29243e-28
WASHC2A	-0.729909	1.36972e-29	1.2965e-28
P3H1	-0.725698	1.37583e-29	1.30155e-28
ZCCHC7	-0.624907	1.37772e-29	1.3026e-28
ANKRD11	-0.788181	1.3898e-29	1.31328e-28
MRPL9	-0.728898	1.40041e-29	1.32256e-28
ZFAND3	-0.824416	1.44965e-29	1.36829e-28
PIAS2	-0.534279	1.48308e-29	1.39905e-28
SIX5	-0.978313	1.48553e-29	1.40057e-28
DYM	-0.634474	1.54861e-29	1.45922e-28
HIF1AN	-0.693714	1.55218e-29	1.46176e-28
TSG101	-0.559665	1.55356e-29	1.46224e-28
GGA2	-0.789667	1.63775e-29	1.54061e-28
GTF2H2C	-0.559841	1.66495e-29	1.56531e-28
RBM4	-0.734647	1.66727e-29	1.56661e-28
RIC8B	-0.856229	1.72158e-29	1.61673e-28
RUVBL1	-0.693462	1.7443e-29	1.63716e-28
OGFRL1	-0.929915	1.76317e-29	1.65394e-28
CCDC137	-0.767516	1.76961e-29	1.65905e-28
ARHGEF11	-1.03607	1.78659e-29	1.67403e-28
ZNF432	-0.861221	1.79643e-29	1.6823e-28
RSRC2	-0.708702	1.83179e-29	1.71446e-28
IFT172	-0.764448	1.86376e-29	1.74341e-28
MSH5	-0.762936	1.87025e-29	1.7485e-28
RLF	-0.832579	1.8833e-29	1.75971e-28
VASP	-0.872911	1.99292e-29	1.8611e-28
CCDC50	-0.723688	1.99848e-29	1.86525e-28
YEATS4	-0.816824	2.00427e-29	1.86961e-28
FAM168A	-0.835267	2.01803e-29	1.8814e-28
NRM	-1.2729	2.06051e-29	1.91992e-28
MCM3AP	-0.770235	2.06605e-29	1.92402e-28
SREK1	-0.747079	2.0675e-29	1.9243e-28
UBE2C	-1.80572	2.06895e-29	1.92457e-28
XPO7	-0.893443	2.07117e-29	1.92556e-28
NASP	-0.869352	2.11035e-29	1.9609e-28
HLTF	-1.02947	2.11956e-29	1.96836e-28
PACS2	-0.661951	2.12704e-29	1.97422e-28
FRS2	-0.835747	2.15262e-29	1.99685e-28
GTF3C1	-0.683236	2.15975e-29	2.00235e-28
ATP2C1	-0.792666	2.19058e-29	2.02981e-28
TBC1D20	-0.643678	2.19339e-29	2.03129e-28
RBBP6	-0.708612	2.21844e-29	2.05335e-28
CHMP2B	-0.737321	2.21984e-29	2.05351e-28
SMARCE1	-0.664792	2.22638e-29	2.05842e-28
YARS2	-0.643386	2.2291e-29	2.05979e-28
SLC35B2	-0.828223	2.23291e-29	2.06188e-28
PM20D2	-1.15912	2.23382e-29	2.06188e-28
GATAD2A	-0.702134	2.24285e-29	2.06907e-28
PASK	-0.709538	2.24826e-29	2.07291e-28
DSN1	-0.923891	2.26009e-29	2.08267e-28
DDX6	-0.722823	2.27953e-29	2.09943e-28
GLMN	-0.681275	2.286e-29	2.10423e-28
SNRPB2	-0.62821	2.30874e-29	2.12399e-28
HILPDA	-1.20592	2.3312e-29	2.14348e-28
FAM135A	-0.776509	2.3393e-29	2.14974e-28
TFAP4	-0.661166	2.39838e-29	2.20282e-28
CEP131	-0.911947	2.43327e-29	2.23363e-28
PCNA	-0.971097	2.45202e-29	2.24961e-28
UTRN	-1.08279	2.46667e-29	2.26182e-28
SLC25A51	-0.729871	2.56106e-29	2.34708e-28
GNL3	-0.757994	2.56602e-29	2.35033e-28
CSTF3	-0.569088	2.65297e-29	2.42865e-28
STK38	-0.832944	2.65892e-29	2.43276e-28
RUFY1	-0.626103	2.70607e-29	2.47454e-28
CDAN1	-0.636722	2.77919e-29	2.54002e-28
RELCH	-0.726413	2.79367e-29	2.55186e-28
SLF2	-0.851707	2.80339e-29	2.55825e-28
TCF12	-0.932201	2.80373e-29	2.55825e-28
CAB39	-0.709736	2.824e-29	2.57534e-28
ACAP2	-0.810299	2.86948e-29	2.61539e-28
SRP72	-0.684076	2.94817e-29	2.68565e-28
MAP1S	-0.754753	3.01932e-29	2.74896e-28
ETF1	-0.609859	3.02946e-29	2.7567e-28
ARF4	-0.744118	3.09263e-29	2.81265e-28
MAP4K5	-0.850103	3.1145e-29	2.83099e-28
ZMYM2	-0.816935	3.23399e-29	2.93801e-28
VPS45	-0.675775	3.32565e-29	3.01964e-28
UPF2	-0.796783	3.51136e-29	3.18653e-28
UBE2K	-0.673759	3.53525e-29	3.20647e-28
UBE2E3	-0.728935	3.64131e-29	3.30088e-28
CRKL	-0.849695	3.69299e-29	3.34591e-28
MSH6	-0.770277	3.69943e-29	3.34993e-28
ADORA2B	-1.00911	3.78782e-29	3.42811e-28
TSPAN3	-0.997607	3.89444e-29	3.5227e-28
MRPS23	-0.661149	3.9482e-29	3.5694e-28
KRI1	-0.61561	3.96793e-29	3.58529e-28
UBA1	-0.62274	3.98671e-29	3.60032e-28
EFHC1	-0.742721	3.99358e-29	3.60457e-28
SF3A3	-0.621125	4.01114e-29	3.61847e-28
MTPAP	-0.606132	4.0184e-29	3.62307e-28
KIAA1328	-0.421436	4.03058e-29	3.63208e-28
CCDC59	-0.556949	4.15975e-29	3.74646e-28
RELA	-0.520894	4.19004e-29	3.77171e-28
FARP2	-0.718813	4.20117e-29	3.7797e-28
SCAF11	-0.808335	4.26565e-29	3.83564e-28
SFT2D2	-0.806771	4.27331e-29	3.84046e-28
WDFY1	-0.811976	4.34207e-29	3.90016e-28
MIB1	-0.992107	4.36501e-29	3.91866e-28
THRAP3	-0.678881	4.37778e-29	3.92801e-28
MCM5	-1.07171	4.3823e-29	3.92996e-28
DOT1L	-0.863773	4.39098e-29	3.93564e-28
CSNK1G2	-0.719513	4.423e-29	3.96221e-28
PPRC1	-0.815041	4.43832e-29	3.97381e-28
ERVK3-1	-0.594055	4.51801e-29	4.04299e-28
PCBP2	-0.587028	4.53817e-29	4.05886e-28
MAEA	-0.686022	4.67326e-29	4.17745e-28
CENPP	-0.472772	4.69154e-29	4.19062e-28
TYW3	-0.706125	4.69302e-29	4.19062e-28
PSMD10	-0.761011	4.73747e-29	4.22806e-28
CAPN15	-0.763273	4.75317e-29	4.23981e-28
MFSD5	-0.651356	4.76812e-29	4.25088e-28
TTC5	-0.565489	4.79078e-29	4.2688e-28
ZBTB17	-0.594065	4.86027e-29	4.32841e-28
C1orf109	-0.821505	4.99139e-29	4.44281e-28
ZDHHC20	-0.968841	5.1183e-29	4.55335e-28
REST	-0.775706	5.15783e-29	4.58608e-28
CTTN	-0.763927	5.24921e-29	4.66484e-28
MCTS2P	-0.84216	5.25199e-29	4.66484e-28
ANKIB1	-0.953742	5.38709e-29	4.7823e-28
SAPCD2	-1.26586	5.42582e-29	4.81412e-28
STK17A	-0.927235	5.43468e-29	4.81943e-28
ANKRD13D	-0.873315	5.53765e-29	4.90813e-28
SRSF11	-0.919854	5.56624e-29	4.93085e-28
MRPL30	-0.583253	5.58552e-29	4.94532e-28
GTF2IRD1	-0.971911	5.65642e-29	5.00544e-28
PNPT1	-0.697803	5.66296e-29	5.00857e-28
RBM4B	-0.643056	5.68018e-29	5.02115e-28
CYB561D1	-0.782573	5.70506e-29	5.04048e-28
SMG9	-0.760422	5.75457e-29	5.08153e-28
TIMMDC1	-0.551002	5.7963e-29	5.11539e-28
CEP192	-0.845338	5.79903e-29	5.11539e-28
SHLD3	-0.617458	5.80711e-29	5.11982e-28
ZNF397	-0.626915	5.83107e-29	5.13823e-28
MED10	-0.745622	5.85169e-29	5.15368e-28
TRMT13	-0.755721	5.90773e-29	5.20029e-28
WDR6	-0.944025	5.97551e-29	5.25719e-28
SLC4A1AP	-0.584776	6.03574e-29	5.30739e-28
SAFB	-0.542733	6.07481e-29	5.33894e-28
DIP2A	-0.732938	6.12806e-29	5.3829e-28
PFDN1	-0.637569	6.2304e-29	5.46756e-28
INTS13	-0.785064	6.23098e-29	5.46756e-28
ZBTB24	-0.602901	6.23524e-29	5.46843e-28
CPLANE1	-0.67706	6.24141e-29	5.47097e-28
SLTM	-0.696147	6.24726e-29	5.47322e-28
EMSY	-0.591523	6.2602e-29	5.48169e-28
RABL2B	-0.663142	6.2981e-29	5.51199e-28
VPS33B	-0.556326	6.34212e-29	5.54761e-28
ZNF518A	-0.895526	6.37256e-29	5.57133e-28
ZGRF1	-0.53557	6.60732e-29	5.77355e-28
TOX4	-0.555286	6.61685e-29	5.77885e-28
CARM1	-0.984253	6.8665e-29	5.99375e-28
ZNF766	-0.591644	6.92442e-29	6.04116e-28
SPTY2D1	-0.728081	6.94216e-29	6.05347e-28
DNAJC14	-1.0666	7.02982e-29	6.12672e-28
CASP8	-0.801519	7.18687e-29	6.26033e-28
GATC	-0.533441	7.32636e-29	6.37851e-28
AQR	-0.672583	7.43233e-29	6.4674e-28
CCNE2	-0.913902	7.44491e-29	6.47498e-28
NXF1	-0.618773	7.48322e-29	6.50492e-28
SKIL	-1.00223	7.5028e-29	6.51854e-28
YWHAG	-0.78008	7.63863e-29	6.63311e-28
SFT2D1	-0.806386	7.82969e-29	6.79548e-28
GYS1	-0.821573	7.84648e-29	6.80653e-28
DFFA	-0.689934	7.87563e-29	6.82827e-28
ZNF724	-0.479902	7.90954e-29	6.85411e-28
GMIP	-0.972361	8.17298e-29	7.07873e-28
RBM25	-0.782425	8.33539e-29	7.21566e-28
OPN1SW	-0.937097	8.49347e-29	7.3487e-28
YY1	-0.580307	8.55267e-29	7.39271e-28
PPP1CB	-0.725528	8.55318e-29	7.39271e-28
ZNF519	-0.341445	8.62743e-29	7.45303e-28
CRAMP1	-0.669626	8.97001e-29	7.74497e-28
CENPM	-1.49373	9.0484e-29	7.80862e-28
SETD2	-0.803156	9.06996e-29	7.82319e-28
RFX7	-0.705319	9.12942e-29	7.87042e-28
GINS3	-0.80338	9.21098e-29	7.93663e-28
NPLOC4	-0.693795	9.30654e-29	8.01484e-28
POGZ	-0.92871	9.35977e-29	8.05653e-28
URB2	-0.785728	9.51996e-29	8.1902e-28
DCAF1	-0.695642	9.71659e-29	8.35507e-28
B4GALT3	-0.715823	9.73243e-29	8.36438e-28
PAN3	-0.853791	9.82747e-29	8.44172e-28
HGS	-1.03695	9.84006e-29	8.4482e-28
TRAK1	-0.817098	9.86548e-29	8.46568e-28
METTL2A	-0.585312	9.9835e-29	8.56255e-28
ADSL	-0.686205	1.00098e-28	8.58067e-28
NIPA1	-1.0138	1.01185e-28	8.66945e-28
PRPF3	-0.824021	1.01397e-28	8.68316e-28
EIPR1	-0.673584	1.02511e-28	8.77407e-28
DUSP18	-0.547993	1.03147e-28	8.82402e-28
AMBRA1	-0.672836	1.03408e-28	8.84182e-28
BRAF	-0.701859	1.03893e-28	8.87868e-28
NAIF1	-0.480035	1.05817e-28	9.03851e-28
BTBD7	-0.724687	1.05925e-28	9.0431e-28
C1GALT1	-0.847009	1.06787e-28	9.11203e-28
CCDC77	-0.707772	1.07137e-28	9.13728e-28
ZNF714	-0.684251	1.08443e-28	9.23967e-28
EAF1	-0.765361	1.08448e-28	9.23967e-28
ZDHHC3	-0.516207	1.10679e-28	9.42488e-28
WASHC5	-0.92274	1.14369e-28	9.73419e-28
NOL9	-0.61467	1.14519e-28	9.74199e-28
EPC1	-0.619713	1.17142e-28	9.96004e-28
PJA1	-0.914522	1.17515e-28	9.9867e-28
NPM1	-0.843366	1.23466e-28	1.04871e-27
DMAC2	-0.554627	1.23976e-28	1.05251e-27
IPO11	-0.53811	1.24542e-28	1.05677e-27
DMWD	-0.641135	1.26405e-28	1.07204e-27
NUP42	-0.65478	1.27691e-28	1.0824e-27
PNRC2	-0.71645	1.28466e-28	1.08841e-27
SCAF8	-0.775813	1.29454e-28	1.09613e-27
TBC1D31	-0.621555	1.29508e-28	1.09613e-27
DGKH	-0.588335	1.32773e-28	1.12319e-27
SNX16	-0.705551	1.35085e-28	1.14218e-27
SLX4	-0.634804	1.36864e-28	1.15663e-27
LENG8	-1.05664	1.37402e-28	1.1602e-27
ARFIP2	-0.627738	1.37425e-28	1.1602e-27
NCKAP5L	-0.95662	1.38009e-28	1.16454e-27
SMG8	-0.942724	1.39457e-28	1.17617e-27
DNAJC2	-0.640854	1.42751e-28	1.20334e-27
CCSAP	-0.912761	1.42867e-28	1.20371e-27
TIMM10B	-0.60037	1.43298e-28	1.20673e-27
ACBD3	-0.85636	1.44717e-28	1.21807e-27
TYMS	-1.38921	1.4479e-28	1.21807e-27
VCL	-1.0061	1.45613e-28	1.22438e-27
TAF15	-0.610185	1.47595e-28	1.24042e-27
GATAD2B	-0.762011	1.48124e-28	1.24424e-27
KDELR1	-0.61476	1.49491e-28	1.25509e-27
THOC5	-0.657684	1.49746e-28	1.2566e-27
PLBD2	-0.741848	1.53222e-28	1.28513e-27
NUP214	-0.635232	1.5656e-28	1.31246e-27
POLDIP3	-0.766206	1.5741e-28	1.31893e-27
SNRPA1	-0.747301	1.58197e-28	1.32486e-27
MOB1B	-0.776094	1.6057e-28	1.34406e-27
ATXN7L3B	-0.937781	1.6118e-28	1.34849e-27
[truncated: 14,718 more rows]

## Sheet: Table S2_2
Table S2_2 Differentially expressed genes.
Genes	Up or down
SLC27A5	Up
APOC1	Up
RNASE4	Up
ANG	Up
HPR	Up
ASPDH	Up
HP	Up
RBP4	Up
SLC10A1	Up
TAT	Up
ACSM2A	Up
DCXR	Up
HPX	Up
RIDA	Up
SERPINC1	Up
HPD	Up
ACSM2B	Up
CYP4A22	Up
GLYATL1	Up
APOC3	Up
CFHR4	Up
TTC36	Up
HAAO	Up
C6	Up
SLC22A1	Up
AZGP1	Up
LDHD	Up
GLYAT	Up
MASP2	Up
APOF	Up
CYP4A11	Up
C8A	Up
PCK1	Up
F9	Up
RDH16	Up
PON1	Up
CFHR2	Up
TM6SF2	Up
PCK2	Up
CD14	Up
ALDOB	Up
TTR	Up
IGSF23	Up
A1BG	Up
AGXT	Up
GYS2	Up
CYP2A6	Up
CES2	Up
NR1I3	Up
CYP4F2	Up
FTCD	Up
CLEC3B	Up
PFKFB1	Up
APOA5	Up
HJV	Up
GNMT	Up
C8B	Up
PON3	Up
HAO1	Up
SEC14L2	Up
RGN	Up
CDO1	Up
FBP1	Up
ETNPPL	Up
AMBP	Up
F12	Up
ADH1B	Up
CYP8B1	Up
GPT	Up
KLKB1	Up
RTP3	Up
UGT2B10	Up
SLC51A	Up
CCL16	Up
ITIH3	Up
AFM	Up
HRG	Up
HSD17B6	Up
ANXA10	Up
IL27	Up
TFR2	Up
DNASE1L3	Up
DAO	Up
INSIG1	Up
SLC13A5	Up
SPP2	Up
ITIH1	Up
ACSM5	Up
MOGAT2	Up
LPA	Up
C4BPB	Up
FABP4	Up
CYP2C9	Up
KNG1	Up
PRAP1	Up
AKR7A3	Up
SERPINA11	Up
GADD45G	Up
ABCB4	Up
LCAT	Up
AQP9	Up
CFHR3	Up
FETUB	Up
APOA1	Up
HGD	Up
AMDHD1	Up
SLC25A47	Up
PIPOX	Up
HMGCS2	Up
OTC	Up
ORM2	Up
ZG16	Up
LRCOL1	Up
GCGR	Up
CYP2A7	Up
SAA4	Up
SLC27A2	Up
PLG	Up
CYP11A1	Up
SERPINF2	Up
MAT1A	Up
CYP2C8	Up
UPB1	Up
PROZ	Up
AGXT2	Up
ADH1C	Up
ADH1A	Up
F2	Up
CYP2B6	Up
DPYS	Up
SDS	Up
FGA	Up
TMPRSS6	Up
ANGPTL4	Up
FNDC5	Up
RBP5	Up
SLC38A3	Up
C4BPA	Up
F13B	Up
BAAT	Up
SULT2A1	Up
HAO2	Up
BHMT	Up
LECT2	Up
UROC1	Up
APOA2	Up
FGG	Up
ORM1	Up
G6PC1	Up
CYP2D6	Up
ALDH8A1	Up
OGDHL	Up
CPS1	Up
MFSD2A	Up
GPLD1	Up
PGLYRP2	Up
ALB	Up
ADH4	Up
CTH	Up
ACOT12	Up
GSTA1	Up
NR1I2	Up
SAA1	Up
FGB	Up
ALDH1L1	Up
SERPINA4	Up
APOH	Up
IGFBP2	Up
AKR1C4	Up
FABP1	Up
SLC22A7	Up
UPP2	Up
MT1X	Up
HGFAC	Up
FXYD1	Up
ARG1	Up
IGFBP1	Up
THRSP	Up
HSD11B1	Up
HSD17B13	Up
CYP3A4	Up
UGT2B7	Up
SLC28A1	Up
UGT2B15	Up
SHBG	Up
SAA2-SAA4	Up
AHSG	Up
CFHR1	Up
CFHR5	Up
SAA2	Up
TRIM55	Up
CYP7A1	Up
IFI27	Up
CYP1A2	Up
C9	Up
CYP2E1	Up
PLA2G2A	Up
YEATS2	Down
SMARCD1	Down
SPATS2	Down
CPSF6	Down
NAA40	Down
ANKRD52	Down
CASP2	Down
NUP62	Down
SGO2	Down
ANLN	Down
DCAF16	Down
BUB1B	Down
RCC2	Down
ECT2	Down
NSD2	Down
KPNB1	Down
KIF2A	Down
SPDL1	Down
CBX1	Down
CIP2A	Down
ILF3	Down
KIF23	Down
CNOT6	Down
CORO1C	Down
POLA1	Down
SPINDOC	Down
SMPD4	Down
QSER1	Down
UBAP2	Down
MTMR2	Down
C4orf46	Down
INCENP	Down
MAPRE1	Down
RACGAP1	Down
SLC36A1	Down
SMARCC1	Down
RBL1	Down
PTBP3	Down
BUB1	Down
HAUS6	Down
CKAP5	Down
GAS2L3	Down
TOPBP1	Down
PSMC3IP	Down
ADNP	Down
DEPDC1B	Down
GINS1	Down
NUP205	Down
CENPE	Down
KIF20B	Down
GTSE1	Down
CCDC93	Down
XRCC2	Down
RHNO1	Down
NCAPD2	Down
FUBP1	Down
KIF11	Down
BARD1	Down
CEP55	Down
PLXNA1	Down
ZFC3H1	Down
PRKCI	Down
NUP107	Down
SOGA1	Down
FANCD2	Down
TMEM201	Down
NCAPH	Down
UBA2	Down
TCERG1	Down
ACTL6A	Down
PRC1	Down
KIF18A	Down
CENPK	Down
IARS1	Down
WDHD1	Down
FANCI	Down
VHL	Down
CDK16	Down
DVL3	Down
MCM8	Down
TOP2A	Down
NEDD1	Down
CENPF	Down
CDCA4	Down
PARPBP	Down
TCF3	Down
KIF20A	Down
GPD2	Down
CHEK1	Down
BAZ2A	Down
UBAP2L	Down
MAD2L1	Down
STIL	Down
KIF18B	Down
CKAP2L	Down
E2F3	Down
ARL6IP6	Down
CENPI	Down
DNMT1	Down
GTPBP2	Down
KIF15	Down
NCAPD3	Down
CHORDC1	Down
KDM5C	Down
CENPO	Down
ARHGAP11A	Down
KPNA2	Down
TRIP13	Down
CDCA8	Down
NCOA6	Down
MSH2	Down
RFWD3	Down
SASS6	Down
PLK4	Down
MYO19	Down
MASTL	Down
PRR11	Down
MELK	Down
GPR107	Down
MPZL1	Down
UHRF1BP1	Down
VEZF1	Down
PLK1	Down
MCM6	Down
NUP188	Down
KIF4A	Down
GPSM2	Down
IQCB1	Down
NCAPG	Down
FOXM1	Down
TUBA1C	Down
MMD	Down
ATXN7L3	Down
CALU	Down
NDE1	Down
SCMH1	Down
NPEPPS	Down
PDE7A	Down
DHX9	Down
FBXL19	Down
LMNB2	Down
FBXO5	Down
CDK4	Down
CD2AP	Down
NDRG3	Down
DLGAP5	Down
DVL2	Down
CDK1	Down
KNTC1	Down
EZH2	Down
MKI67	Down
CENPL	Down
DYRK2	Down
TPX2	Down
BAK1	Down
ZBTB12	Down
HJURP	Down
MCM2	Down
XPOT	Down
RNF44	Down
CEP170	Down
NCAPG2	Down
KHDC4	Down
RNF145	Down
PIGS	Down
UHRF1	Down
NFYA	Down
CAMSAP2	Down
CSRNP2	Down
BRCA1	Down
YWHAQ	Down
RAD51AP1	Down
PRRC2A	Down
NAP1L1	Down
CCNF	Down
SETD5	Down
POLD1	Down
NEMP1	Down
GNPDA1	Down
LIMS1	Down
SOCS7	Down
MCM10	Down
CAD	Down
LIN9	Down
NUF2	Down
DCK	Down
MCM4	Down
CBL	Down
SPRING1	Down
CLSPN	Down
ORC1	Down
LSM14B	Down
POGK	Down
SUZ12	Down
TUBA1B	Down
KIF2C	Down
MCM3	Down
ACLY	Down
KIF14	Down
PLAGL2	Down
LIMK1	Down
PRR12	Down
PNMA1	Down
ASAP1	Down
JRKL	Down
TP53BP1	Down
NUSAP1	Down
RAD54L	Down
EXO1	Down
LMNB1	Down
USP1	Down
NEK2	Down
CDC6	Down
DNAJC9	Down
BTBD3	Down
CDK2	Down
RAI1	Down
SMC4	Down
SOAT1	Down
CDCA2	Down
MFSD14B	Down
NCKAP1	Down
KIFC1	Down
EME1	Down
CHAF1B	Down
H2AZ1	Down
SGO1	Down
TTK	Down
SRC	Down
ARHGEF39	Down
SEPTIN2	Down
SUCO	Down
MIS18BP1	Down
MYBL2	Down
ABL1	Down
WDR62	Down
PHF19	Down
SHCBP1	Down
GINS4	Down
SMC2	Down
BCL9	Down
CYRIB	Down
CDCA5	Down
CKAP2	Down
ORC6	Down
ATXN2L	Down
SUGP2	Down
CS	Down
ZC2HC1A	Down
HELLS	Down
PTPN12	Down
NUP210	Down
CCNB1	Down
TMEM184B	Down
RNF24	Down
CENPA	Down
BCOR	Down
RAD51	Down
MAP3K1	Down
TMEM65	Down
MSI2	Down
RFC4	Down
ZWINT	Down
NBEAL2	Down
CENPH	Down
ADAM17	Down
PKM	Down
SUSD1	Down
ACVR1	Down
MED12	Down
SKA3	Down
ARHGEF2	Down
FANCE	Down
CDC7	Down
NEIL3	Down
TASOR2	Down
SPC25	Down
PLEKHB2	Down
DTL	Down
DEPDC1	Down
ATP2B1	Down
CCNB2	Down
WSB1	Down
RERE	Down
FKBP9	Down
DRAM1	Down
ATP13A2	Down
DNMT3B	Down
TMEM165	Down
TCTN2	Down
B4GALT5	Down
FIGNL1	Down
HEATR1	Down
PPT1	Down
FANCG	Down
MDC1	Down
FNDC3B	Down
FEN1	Down
ZNF710	Down
STX3	Down
DNMT3A	Down
PAPSS1	Down
PRRC2C	Down
E2F8	Down
EPB41L2	Down
KLC2	Down
SLC39A6	Down
TACC3	Down
OSBPL3	Down
NDC80	Down
RAD21	Down
DAGLA	Down
PRKCD	Down
CHML	Down
LHFPL2	Down
BCL9L	Down
TTYH3	Down
TAF6	Down
WASF1	Down
SPIN1	Down
BCORL1	Down
TPR	Down
PIF1	Down
SMAD5	Down
OIP5	Down
MIS18A	Down
CDC42SE1	Down
LDB1	Down
FNBP1L	Down
RAVER1	Down
SELENON	Down
PCLAF	Down
TTLL4	Down
FAM117B	Down
HMGN4	Down
MTFR2	Down
UBE2T	Down
HMGA1	Down
CKAP4	Down
G6PD	Down
ZNF292	Down
CLSTN1	Down
HMGB2	Down
IFNGR2	Down
ENAH	Down
PLEKHG2	Down
RBBP8	Down
SKA1	Down
UCK2	Down
PBK	Down
PIAS3	Down
TCF19	Down
SINHCAF	Down
SMC3	Down
ASF1B	Down
MEX3A	Down
C15orf39	Down
DYNC1I2	Down
VGLL4	Down
CDC25A	Down
WDR76	Down
B3GALNT1	Down
STK24	Down
ASPM	Down
RFC3	Down
CCDC14	Down
MAFG	Down
KIAA1522	Down
TIMELESS	Down
ZNF532	Down
TONSL	Down
TROAP	Down
CCNA2	Down
ZNF384	Down
SPRED1	Down
PKMYT1	Down
FGD6	Down
CDK2AP1	Down
HROB	Down
PLCG1	Down
RNF144A	Down
CDC45	Down
STMN1	Down
H2AX	Down
SLC39A10	Down
DLG5	Down
YWHAZ	Down
CDC20	Down
RUSC1	Down
TYRO3	Down
HMMR	Down
PRKDC	Down
GPRIN1	Down
ADAM9	Down
SPTLC1	Down
ZNF28	Down
LPCAT1	Down
PLCB1	Down
TRIM45	Down
CDCA7L	Down
LAMC1	Down
NFE2L3	Down
ZDHHC13	Down
CSPP1	Down
ESPL1	Down
CLIC1	Down
CENPQ	Down
ZMIZ1	Down
ARHGAP18	Down
DEK	Down
TRAIP	Down
MID1IP1	Down
SIPA1L3	Down
PIMREG	Down
MFSD10	Down
ATP1B3	Down
PIP5K1A	Down
PSRC1	Down
SMC1A	Down
MCM7	Down
IKBKE	Down
RRM2	Down
ZNF468	Down
UNC119B	Down
ELF4	Down
BRD3	Down
ABCC1	Down
ZNF239	Down
BIRC5	Down
CDCA3	Down
ARHGEF11	Down
NRM	Down
UBE2C	Down
HLTF	Down
PM20D2	Down
HILPDA	Down
UTRN	Down
ADORA2B	Down
MCM5	Down
SAPCD2	Down
DNAJC14	Down
SKIL	Down
CENPM	Down
HGS	Down
NIPA1	Down
LENG8	Down
TYMS	Down
VCL	Down
PELI1	Down
HIF1A	Down
ERMP1	Down
CDT1	Down
LRRC1	Down
IQGAP1	Down
ZNF761	Down
PAQR4	Down
AURKB	Down
RAP2A	Down
TUFT1	Down
ATP1A1	Down
UBE2Q2	Down
PSPH	Down
SLC1A5	Down
TMCO3	Down
NUP153	Down
TLCD3A	Down
PPP1R9B	Down
NEO1	Down
RAB42	Down
TMEM164	Down
ITPR3	Down
RASSF3	Down
MARCKS	Down
TFDP1	Down
CENPU	Down
RHOQ	Down
KIF3C	Down
C12orf75	Down
SMARCC2	Down
MAZ	Down
ITGAV	Down
ATP11A	Down
IQGAP3	Down
GPD1L	Down
CDKN3	Down
ZNF816	Down
FZD1	Down
MTCL1	Down
STAG1	Down
KRBA1	Down
LRIG3	Down
SERPINH1	Down
KLHL23	Down
ITGA5	Down
NCEH1	Down
CKS2	Down
SLC41A1	Down
LPCAT4	Down
SLC38A1	Down
FMNL2	Down
TEDC2	Down
BMF	Down
RASSF8	Down
PLXNA3	Down
ZNF320	Down
MYLIP	Down
NFATC2	Down
POM121	Down
MYRF	Down
YAP1	Down
TFRC	Down
SLC25A24	Down
COLCA2	Down
CDCA7	Down
M6PR	Down
CENPW	Down
SMOX	Down
SALL2	Down
TNFRSF21	Down
RHBDF2	Down
TPM4	Down
RECQL	Down
SOX4	Down
ETV5	Down
AGRN	Down
INTS3	Down
ENO2	Down
IGSF3	Down
CNTNAP1	Down
NT5DC2	Down
TMEM51	Down
ITGA2	Down
ZNF711	Down
ABHD17C	Down
ANXA5	Down
NECTIN1	Down
HACD2	Down
NREP	Down
CBX2	Down
SLC7A1	Down
LAMA5	Down
CDC25B	Down
DDX39B	Down
RIBC2	Down
GRAMD1A	Down
SKP2	Down
ADD3	Down
PIP4P2	Down
PPP1R18	Down
ITPRIPL2	Down
MAT2A	Down
NT5C2	Down
IGF2BP3	Down
SH3BP1	Down
STK26	Down
MACIR	Down
TEAD2	Down
TMEM132A	Down
ITGB1	Down
HOMER3	Down
PTTG1	Down
SERPINI1	Down
CARMIL1	Down
NCK2	Down
FAM111B	Down
DSG2	Down
FBLIM1	Down
AURKA	Down
IMPDH1	Down
ZNF217	Down
POGLUT3	Down
MARCKSL1	Down
CA9	Down
FRAS1	Down
FAM83D	Down
COL9A2	Down
SCRN1	Down
DBN1	Down
LAMB1	Down
GLS	Down
PLOD2	Down
CTSV	Down
DDR1	Down
RMI2	Down
ZBED6CL	Down
UNC5B	Down
CDC25C	Down
SLC6A6	Down
TBC1D14	Down
ARNT2	Down
UBE2S	Down
KITLG	Down
STK39	Down
E2F1	Down
CSF1	Down
TES	Down
ALDH3B1	Down
ELF1	Down
CHST11	Down
ALDOA	Down
DYNC1LI2	Down
NRSN2	Down
P3H4	Down
SLC16A3	Down
SFXN3	Down
ZNF83	Down
SOX12	Down
PTGFRN	Down
INAVA	Down
MFSD6	Down
GCNT3	Down
SLC22A15	Down
ZSWIM5	Down
TOR4A	Down
SGPP2	Down
TTC39A	Down
CLIP2	Down
SPAG5	Down
MMP14	Down
ZNF496	Down
RECQL4	Down
PAQR5	Down
PFKFB3	Down
ELOVL7	Down
RTL6	Down
TMED3	Down
ASNS	Down
DNM1	Down
TGFB2	Down
PLAUR	Down
RAVER2	Down
ENC1	Down
B3GNT9	Down
RAB3IL1	Down
JAG1	Down
KCTD17	Down
EGLN3	Down
MCAM	Down
ITGB4	Down
NIBAN2	Down
FUT4	Down
PAFAH1B3	Down
PAPLN	Down
OLFML2B	Down
SLC2A1	Down
ATP8B2	Down
SPC24	Down
SPHK1	Down
DLG3	Down
TK1	Down
FZD7	Down
CRMP1	Down
RAP1GAP	Down
SEC24C	Down
B3GNT5	Down
CHD3	Down
PITX1	Down
LPAR2	Down
PGAP4	Down
SEL1L3	Down
BICC1	Down
ATAD2	Down
CORO2A	Down
PDP1	Down
MFAP2	Down
LARP6	Down
ARL4C	Down
PABPC1L	Down
BLMH	Down
LOX	Down
QPCT	Down
MMP11	Down
EVC	Down
GLIS2	Down
NUAK2	Down
NDRG1	Down
S100A11	Down
PLBD1	Down
PFKP	Down
NID1	Down
COL5A2	Down
KRT80	Down
EIF5A2	Down
ANO9	Down
DAB2	Down
IL4I1	Down
CLGN	Down
SEMA6A	Down
ARID3A	Down
TNFAIP3	Down
CTSC	Down
CTNND2	Down
ANKS6	Down
UAP1L1	Down
PTK7	Down
HUNK	Down
FLNA	Down
GAL3ST1	Down
TCEAL9	Down
WNK2	Down
ALOX5	Down
PLEKHB1	Down
MMP1	Down
LAPTM4B	Down
ITGAM	Down
TRIM47	Down
IER3	Down
ADM2	Down
SOX9	Down
MAPK13	Down
MMP12	Down
FCGBP	Down
CD24	Down
ITM2C	Down
SLC44A3	Down
SLC2A6	Down
LYPD1	Down
SERPINE2	Down
FSCN1	Down
ITGA3	Down
SNAP25	Down
GRB7	Down
MELTF	Down
OLR1	Down
NCF2	Down
FOXJ1	Down
NEURL3	Down
BICDL1	Down
BLVRA	Down
CCNE1	Down
CTHRC1	Down
IGF2BP2	Down
PPM1H	Down
SLFN13	Down
SLC29A4	Down
RAB3D	Down
NEB	Down
MYOF	Down
MACROH2A2	Down
TSPAN15	Down
BHLHE41	Down
PRKAA2	Down
PTHLH	Down
TRNP1	Down
FAM241B	Down
LAMP5	Down
SLC7A11	Down
PFN2	Down
POF1B	Down
EPS8L3	Down
CD109	Down
EPDR1	Down
RAB11FIP1	Down
EHF	Down
HKDC1	Down
BAMBI	Down
TMC6	Down
OLFML3	Down
ZIC2	Down
FGFR3	Down
ROBO1	Down
HK2	Down
RGS2	Down
ICAM1	Down
FERMT1	Down
SPATC1L	Down
LTBP1	Down
SULF1	Down
SYT13	Down
TGFA	Down
SLC6A8	Down
RGS1	Down
OSMR	Down
SCPEP1	Down
COL6A3	Down
GNAZ	Down
GPX7	Down
PLPP2	Down
LIF	Down
RASEF	Down
SNX7	Down
SULT1C2	Down
CAPG	Down
TGFB1	Down
KIF12	Down
USH1C	Down
NXPH4	Down
GPC4	Down
PMEPA1	Down
SPP1	Down
PLP2	Down
SNX10	Down
TREM2	Down
SGCE	Down
CXCL5	Down
HNF1B	Down
IGSF1	Down
PYCR1	Down
KRT19	Down
PROM1	Down
LINGO1	Down
FKBP10	Down
FBLN1	Down
TUSC3	Down
NPNT	Down
GOLM1	Down
LAMC2	Down
DCDC2	Down
PHLDA2	Down
SPINT1	Down
IGF2BP1	Down
CXCL8	Down
ETV4	Down
DKK1	Down
MBOAT1	Down
COL4A5	Down
ITPKA	Down
SLC34A2	Down
MMP9	Down
THBS1	Down
CDS1	Down
SMIM22	Down
BACE2	Down
CYBA	Down
VIL1	Down
KLF5	Down
VTCN1	Down
C1orf116	Down
ARMCX3	Down
VCAN	Down
DUSP9	Down
HTRA3	Down
PRAME	Down
QSOX1	Down
RENBP	Down
ITIH5	Down
POSTN	Down
VEGFB	Down
FLNC	Down
MMP7	Down
TCEAL8	Down
CAPN6	Down
SCTR	Down
RHOBTB1	Down
PKIB	Down
HLA-DQB2	Down
NRCAM	Down
ARL14	Down
MSC	Down
CCL20	Down
FOXQ1	Down
BAIAP2L2	Down
MEP1A	Down
PTGES	Down
COL5A1	Down
S100A6	Down
UCHL1	Down
COL1A2	Down
TMPRSS3	Down
CXCL1	Down
CACNG4	Down
PEG10	Down
H2AW	Down
LDOC1	Down
ANXA13	Down
BEX2	Down
TFF2	Down
CLDN4	Down
COL3A1	Down
COL1A1	Down
UBD	Down
MISP	Down
ST14	Down
SERPINE1	Down
B3GNT3	Down
UGT2A3	Down
TNFRSF19	Down
LOXL4	Down
PRR15L	Down
AGR2	Down
FXYD2	Down
SFRP5	Down
PODXL2	Down
CA12	Down
CXCL6	Down
MDK	Down
C15orf48	Down
TESC	Down
SUSD4	Down
S100A9	Down
OR2I1P	Down
CST1	Down
PCSK1N	Down
SPINT2	Down
AFP	Down
NPTX2	Down
EPCAM	Down
GTSF1	Down
FDCSP	Down
UPK3A	Down
UGT2B11	Down
FGFR2	Down
ACSL4	Down
S100A14	Down
SFN	Down
CTAG2	Down
FAM3B	Down
LYZ	Down
NTS	Down
S100P	Down
MAGEA6	Down
MAGEA3	Down
AP1M2	Down
GPC3	Down
SSX1	Down
PGC	Down
SPINK1	Down

## Sheet: Table S2_3
Table S2_3 GO and KEGG analysis of Differentially expressed genes
ID	description	GeneRatio	BgRatio	pValue	FDR	qvalue	geneID	size	DB	enrichmentRatio
hsa04610	hsa04610	Complement and coagulation cascades	24/136	85/8093	1.21136e-23	1.79281e-21	1.27511e-21	SERPINC1/CFHR4/C6/MASP2/C8A/F9/CFHR2/C8B/F12/KLKB1/C4BPB/KNG1/CFHR3/PLG/SERPINF2/F2/FGA/C4BPA/F13B/FGG/FGB/CFHR1/CFHR5/C9	24	pathway_KEGG	Up
hsa00980	hsa00980	Metabolism of xenobiotics by cytochrome P450	19/136	78/8093	1.55072e-17	1.14753e-15	8.16169e-16	CYP2A6/ADH1B/UGT2B10/CYP2C9/AKR7A3/CYP2A7/ADH1C/ADH1A/CYP2B6/SULT2A1/CYP2D6/ADH4/GSTA1/HSD11B1/CYP3A4/UGT2B7/UGT2B15/CYP1A2/CYP2E1	19	pathway_KEGG	Up
hsa00982	hsa00982	Drug metabolism - cytochrome P450	17/136	72/8093	1.52559e-15	7.52626e-14	5.35296e-14	CYP2A6/ADH1B/UGT2B10/CYP2C9/CYP2A7/CYP2C8/ADH1C/ADH1A/CYP2B6/CYP2D6/ADH4/GSTA1/CYP3A4/UGT2B7/UGT2B15/CYP1A2/CYP2E1	17	pathway_KEGG	Up
hsa00830	hsa00830	Retinol metabolism	16/136	68/8093	1.15691e-14	4.28058e-13	3.04451e-13	RDH16/CYP2A6/ADH1B/UGT2B10/HSD17B6/CYP2C9/CYP2A7/CYP2C8/ADH1C/ADH1A/CYP2B6/ADH4/CYP3A4/UGT2B7/UGT2B15/CYP1A2	16	pathway_KEGG	Up
hsa03320	hsa03320	PPAR signaling pathway	14/136	76/8093	2.06308e-11	6.1067e-10	4.34332e-10	SLC27A5/APOC3/PCK1/PCK2/APOA5/CYP8B1/FABP4/APOA1/HMGCS2/SLC27A2/ANGPTL4/APOA2/FABP1/CYP7A1	14	pathway_KEGG	Up
hsa05204	hsa05204	Chemical carcinogenesis - DNA adducts	13/136	69/8093	8.28392e-11	2.04337e-09	1.45332e-09	CYP2A6/UGT2B10/CYP2C9/CYP2A7/CYP2C8/SULT2A1/GSTA1/HSD11B1/CYP3A4/UGT2B7/UGT2B15/CYP1A2/CYP2E1	13	pathway_KEGG	Up
hsa04976	hsa04976	Bile secretion	14/136	89/8093	1.90399e-10	4.02558e-09	2.86315e-09	SLC27A5/SLC10A1/SLC22A1/UGT2B10/SLC51A/ABCB4/AQP9/BAAT/SULT2A1/SLC22A7/CYP3A4/UGT2B7/UGT2B15/CYP7A1	14	pathway_KEGG	Up
hsa00140	hsa00140	Steroid hormone biosynthesis	11/136	61/8093	4.10651e-09	7.59705e-08	5.40331e-08	UGT2B10/HSD17B6/CYP11A1/AKR1C4/HSD11B1/CYP3A4/UGT2B7/UGT2B15/CYP7A1/CYP1A2/CYP2E1	11	pathway_KEGG	Up
hsa00983	hsa00983	Drug metabolism - other enzymes	12/136	80/8093	7.07971e-09	1.16422e-07	8.28037e-08	CYP2A6/CES2/UGT2B10/CYP2A7/UPB1/DPYS/GSTA1/UPP2/CYP3A4/UGT2B7/UGT2B15/CYP2E1	12	pathway_KEGG	Up
hsa04979	hsa04979	Cholesterol metabolism	9/136	50/8093	1.1452e-07	1.6949e-06	1.20547e-06	APOC1/APOC3/LPA/LCAT/APOA1/ANGPTL4/APOA2/APOH/CYP7A1	9	pathway_KEGG	Up
hsa00260	hsa00260	Glycine, serine and threonine metabolism	8/136	40/8093	2.52956e-07	3.40341e-06	2.42064e-06	AGXT/GNMT/DAO/PIPOX/AGXT2/SDS/BHMT/CTH	8	pathway_KEGG	Up
hsa00620	hsa00620	Pyruvate metabolism	8/136	47/8093	9.36881e-07	1.15549e-05	8.21825e-06	LDHD/PCK1/PCK2/ADH1B/ADH1C/ADH1A/ADH4/ACOT12	8	pathway_KEGG	Up
hsa00350	hsa00350	Tyrosine metabolism	7/136	36/8093	1.80217e-06	2.0517e-05	1.45925e-05	TAT/HPD/ADH1B/HGD/ADH1C/ADH1A/ADH4	7	pathway_KEGG	Up
hsa00120	hsa00120	Primary bile acid biosynthesis	5/136	17/8093	6.5499e-06	6.87711e-05	4.89126e-05	SLC27A5/CYP8B1/BAAT/AKR1C4/CYP7A1	5	pathway_KEGG	Up
hsa00591	hsa00591	Linoleic acid metabolism	6/136	29/8093	6.97004e-06	6.87711e-05	4.89126e-05	CYP2C9/CYP2C8/CYP3A4/CYP1A2/CYP2E1/PLA2G2A	6	pathway_KEGG	Up
hsa00010	hsa00010	Glycolysis / Gluconeogenesis	8/136	67/8093	1.46523e-05	0.000135533	9.63964e-05	PCK1/PCK2/ALDOB/FBP1/ADH1B/ADH1C/ADH1A/ADH4	8	pathway_KEGG	Up
hsa00270	hsa00270	Cysteine and methionine metabolism	7/136	50/8093	1.77273e-05	0.000154332	0.000109767	TAT/CDO1/MAT1A/AGXT2/SDS/BHMT/CTH	7	pathway_KEGG	Up
hsa01200	hsa01200	Carbon metabolism	10/136	115/8093	2.14625e-05	0.00017647	0.000125512	ALDOB/AGXT/HAO1/RGN/FBP1/GPT/SDS/HAO2/OGDHL/CPS1	10	pathway_KEGG	Up
hsa01230	hsa01230	Biosynthesis of amino acids	8/136	75/8093	3.38578e-05	0.000263735	0.000187578	ALDOB/GPT/OTC/MAT1A/SDS/CPS1/CTH/ARG1	8	pathway_KEGG	Up
hsa04146	hsa04146	Peroxisome	7/136	82/8093	0.000431841	0.00310919	0.00221137	AGXT/HAO1/DAO/PIPOX/SLC27A2/BAAT/HAO2	7	pathway_KEGG	Up
hsa00220	hsa00220	Arginine biosynthesis	4/136	22/8093	0.000441169	0.00310919	0.00221137	GPT/OTC/CPS1/ARG1	4	pathway_KEGG	Up
hsa00590	hsa00590	Arachidonic acid metabolism	6/136	61/8093	0.000524448	0.0035281	0.00250932	CYP4F2/CYP2C9/CYP2C8/CYP2B6/CYP2E1/PLA2G2A	6	pathway_KEGG	Up
hsa00650	hsa00650	Butanoate metabolism	4/136	28/8093	0.0011421	0.00734914	0.00522698	ACSM2A/ACSM2B/ACSM5/HMGCS2	4	pathway_KEGG	Up
hsa01240	hsa01240	Biosynthesis of cofactors	9/136	156/8093	0.00121355	0.00748357	0.0053226	ASPDH/HPD/HAAO/RGN/UGT2B10/HSD17B6/MAT1A/UGT2B7/UGT2B15	9	pathway_KEGG	Up
hsa00053	hsa00053	Ascorbate and aldarate metabolism	4/136	30/8093	0.00148945	0.00881757	0.00627138	RGN/UGT2B10/UGT2B7/UGT2B15	4	pathway_KEGG	Up
hsa00040	hsa00040	Pentose and glucuronate interconversions	4/136	34/8093	0.0023931	0.0136223	0.00968868	DCXR/UGT2B10/UGT2B7/UGT2B15	4	pathway_KEGG	Up
hsa00360	hsa00360	Phenylalanine metabolism	3/136	17/8093	0.00265615	0.0145596	0.0103553	TAT/HPD/GLYAT	3	pathway_KEGG	Up
hsa00250	hsa00250	Alanine, aspartate and glutamate metabolism	4/136	37/8093	0.00327825	0.0173279	0.0123243	AGXT/GPT/AGXT2/CPS1	4	pathway_KEGG	Up
hsa05171	hsa05171	Coronavirus disease - COVID-19	10/136	232/8093	0.00559808	0.0262187	0.0186477	C6/MASP2/C8A/C8B/F2/FGA/F13B/FGG/FGB/C9	10	pathway_KEGG	Up
hsa00340	hsa00340	Histidine metabolism	3/136	22/8093	0.00565783	0.0262187	0.0186477	FTCD/AMDHD1/UROC1	3	pathway_KEGG	Up
hsa00071	hsa00071	Fatty acid degradation	4/136	43/8093	0.0056689	0.0262187	0.0186477	ADH1B/ADH1C/ADH1A/ADH4	4	pathway_KEGG	Up
hsa04975	hsa04975	Fat digestion and absorption	4/136	43/8093	0.0056689	0.0262187	0.0186477	MOGAT2/APOA1/FABP1/PLA2G2A	4	pathway_KEGG	Up
hsa04964	hsa04964	Proximal tubule bicarbonate reclamation	3/136	23/8093	0.00642744	0.0288261	0.0205022	PCK1/PCK2/SLC38A3	3	pathway_KEGG	Up
hsa04922	hsa04922	Glucagon signaling pathway	6/136	107/8093	0.00911668	0.0396844	0.028225	PCK1/PCK2/GYS2/PFKFB1/FBP1/GCGR	6	pathway_KEGG	Up
hsa00020	hsa00020	Citrate cycle (TCA cycle)	3/136	30/8093	0.0135299	0.0529786	0.0376804	PCK1/PCK2/OGDHL	3	pathway_KEGG	Up
hsa00030	hsa00030	Pentose phosphate pathway	3/136	30/8093	0.0135299	0.0529786	0.0376804	ALDOB/RGN/FBP1	3	pathway_KEGG	Up
hsa00630	hsa00630	Glyoxylate and dicarboxylate metabolism	3/136	30/8093	0.0135299	0.0529786	0.0376804	AGXT/HAO1/HAO2	3	pathway_KEGG	Up
hsa00130	hsa00130	Ubiquinone and other terpenoid-quinone biosynthesis	2/136	11/8093	0.0139606	0.0529786	0.0376804	TAT/HPD	2	pathway_KEGG	Up
hsa00430	hsa00430	Taurine and hypotaurine metabolism	2/136	11/8093	0.0139606	0.0529786	0.0376804	CDO1/BAAT	2	pathway_KEGG	Up
hsa00051	hsa00051	Fructose and mannose metabolism	3/136	33/8093	0.0175319	0.0648681	0.0461366	ALDOB/PFKFB1/FBP1	3	pathway_KEGG	Up
hsa05143	hsa05143	African trypanosomiasis	3/136	37/8093	0.0237877	0.0858679	0.0610725	HPR/KNG1/APOA1	3	pathway_KEGG	Up
hsa05207	hsa05207	Chemical carcinogenesis - receptor activation	8/136	212/8093	0.0262364	0.0924522	0.0657555	NR1I3/UGT2B10/CYP2B6/GSTA1/CYP3A4/UGT2B7/UGT2B15/CYP1A2	8	pathway_KEGG	Up
hsa05146	hsa05146	Amoebiasis	5/136	102/8093	0.0283526	0.0975856	0.0694065	C8A/CD14/C8B/ARG1/C9	5	pathway_KEGG	Up
hsa00380	hsa00380	Tryptophan metabolism	3/136	42/8093	0.0330899	0.111302	0.0791624	HAAO/ALDH8A1/CYP1A2	3	pathway_KEGG	Up
hsa04931	hsa04931	Insulin resistance	5/136	108/8093	0.0350742	0.11308	0.0804267	SLC27A5/PCK1/PCK2/GYS2/SLC27A2	5	pathway_KEGG	Up
hsa00860	hsa00860	Porphyrin and chlorophyll metabolism	3/136	43/8093	0.0351465	0.11308	0.0804267	UGT2B10/UGT2B7/UGT2B15	3	pathway_KEGG	Up
hsa00670	hsa00670	One carbon pool by folate	2/136	20/8093	0.043717	0.137662	0.0979105	FTCD/ALDH1L1	2	pathway_KEGG	Up
hsa00770	hsa00770	Pantothenate and CoA biosynthesis	2/136	21/8093	0.0477981	0.147378	0.10482	UPB1/DPYS	2	pathway_KEGG	Up
hsa04152	hsa04152	AMPK signaling pathway	5/136	120/8093	0.0512705	0.154858	0.110141	PCK1/PCK2/GYS2/PFKFB1/FBP1	5	pathway_KEGG	Up
hsa00240	hsa00240	Pyrimidine metabolism	3/136	56/8093	0.0675859	0.200054	0.142286	UPB1/DPYS/UPP2	3	pathway_KEGG	Up
hsa05417	hsa05417	Lipid and atherosclerosis	7/136	215/8093	0.069998	0.203131	0.144475	CD14/CYP2A6/CYP2C9/APOA1/CYP2A7/CYP2C8/CYP2B6	7	pathway_KEGG	Up
hsa00410	hsa00410	beta-Alanine metabolism	2/136	31/8093	0.0950514	0.270531	0.192412	UPB1/DPYS	2	pathway_KEGG	Up
hsa05133	hsa05133	Pertussis	3/136	76/8093	0.135455	0.378253	0.269028	CD14/C4BPB/C4BPA	3	pathway_KEGG	Up
hsa04611	hsa04611	Platelet activation	4/136	124/8093	0.155471	0.426105	0.303062	F2/FGA/FGG/FGB	4	pathway_KEGG	Up
GO:0016054	GO:0016054	organic acid catabolic process	35/189	282/18866	3.23091e-28	3.30038e-25	2.40278e-25	TAT/DCXR/RIDA/HPD/HAAO/LDHD/CYP4A11/PCK1/PON1/PCK2/AGXT/CYP4F2/FTCD/PON3/HAO1/CDO1/GPT/DAO/HGD/AMDHD1/PIPOX/OTC/SLC27A2/MAT1A/AGXT2/SDS/SULT2A1/HAO2/UROC1/ALDH8A1/MFSD2A/CTH/ALDH1L1/FABP1/ARG1	35	geneontology_Biological_Process	Up
GO:0046395	GO:0046395	carboxylic acid catabolic process	35/189	282/18866	3.23091e-28	3.30038e-25	2.40278e-25	TAT/DCXR/RIDA/HPD/HAAO/LDHD/CYP4A11/PCK1/PON1/PCK2/AGXT/CYP4F2/FTCD/PON3/HAO1/CDO1/GPT/DAO/HGD/AMDHD1/PIPOX/OTC/SLC27A2/MAT1A/AGXT2/SDS/SULT2A1/HAO2/UROC1/ALDH8A1/MFSD2A/CTH/ALDH1L1/FABP1/ARG1	35	geneontology_Biological_Process	Up
GO:0044282	GO:0044282	small molecule catabolic process	41/189	452/18866	1.41431e-27	9.63148e-25	7.01202e-25	TAT/DCXR/RIDA/HPD/HAAO/LDHD/CYP4A11/PCK1/PON1/PCK2/ALDOB/AGXT/CYP4F2/FTCD/PON3/HAO1/CDO1/GPT/DAO/HGD/AMDHD1/PIPOX/OTC/SLC27A2/MAT1A/UPB1/AGXT2/DPYS/SDS/SULT2A1/HAO2/UROC1/ALDH8A1/MFSD2A/ADH4/CTH/ALDH1L1/FABP1/UPP2/ARG1/CYP7A1	41	geneontology_Biological_Process	Up
GO:0006631	GO:0006631	fatty acid metabolic process	38/189	396/18866	1.90121e-26	9.71042e-24	7.06949e-24	SLC27A5/APOC1/ACSM2A/ACSM2B/CYP4A22/APOC3/CYP4A11/PCK1/PON1/PCK2/CYP2A6/CES2/CYP4F2/APOA5/PON3/HAO1/RGN/INSIG1/ACSM5/CYP2C9/APOA1/CYP2A7/SLC27A2/CYP2C8/CYP2B6/BAAT/HAO2/CYP2D6/MFSD2A/ADH4/ACOT12/GSTA1/AKR1C4/FABP1/CYP3A4/CYP7A1/CYP1A2/CYP2E1	38	geneontology_Biological_Process	Up
GO:0046394	GO:0046394	carboxylic acid biosynthetic process	35/189	367/18866	2.78129e-24	1.03812e-21	7.55785e-22	SLC27A5/APOC1/ACSM2A/ACSM2B/CYP4A22/APOC3/HAAO/CYP4A11/AGXT/APOA5/RGN/CDO1/CYP8B1/GPT/INSIG1/ACSM5/CYP2C9/APOA1/OTC/SLC27A2/CYP2C8/UPB1/AGXT2/SDS/BAAT/BHMT/CYP2D6/ALDH8A1/CPS1/CTH/AKR1C4/CYP3A4/CYP7A1/CYP1A2/CYP2E1	35	geneontology_Biological_Process	Up
GO:0016053	GO:0016053	organic acid biosynthetic process	35/189	368/18866	3.04881e-24	1.03812e-21	7.55785e-22	SLC27A5/APOC1/ACSM2A/ACSM2B/CYP4A22/APOC3/HAAO/CYP4A11/AGXT/APOA5/RGN/CDO1/CYP8B1/GPT/INSIG1/ACSM5/CYP2C9/APOA1/OTC/SLC27A2/CYP2C8/UPB1/AGXT2/SDS/BAAT/BHMT/CYP2D6/ALDH8A1/CPS1/CTH/AKR1C4/CYP3A4/CYP7A1/CYP1A2/CYP2E1	35	geneontology_Biological_Process	Up
GO:0008202	GO:0008202	steroid metabolic process	32/189	332/18866	2.23338e-22	6.51829e-20	4.74552e-20	SLC27A5/APOC1/APOF/RDH16/PON1/CYP2A6/APOA5/SEC14L2/CYP8B1/HSD17B6/INSIG1/CYP2C9/LCAT/APOA1/HMGCS2/SLC27A2/CYP11A1/CYP2C8/CYP2B6/BAAT/SULT2A1/APOA2/CYP2D6/NR1I2/AKR1C4/HSD11B1/CYP3A4/UGT2B7/UGT2B15/CYP7A1/CYP1A2/CYP2E1	32	geneontology_Biological_Process	Up
GO:1901605	GO:1901605	alpha-amino acid metabolic process	26/189	202/18866	1.60928e-21	4.10971e-19	2.992e-19	TAT/RIDA/HPD/GLYATL1/HAAO/GLYAT/AGXT/FTCD/GNMT/CDO1/GPT/DAO/HGD/AMDHD1/PIPOX/OTC/MAT1A/AGXT2/SDS/BAAT/BHMT/UROC1/ALDH8A1/CPS1/CTH/ARG1	26	geneontology_Biological_Process	Up
GO:1901606	GO:1901606	alpha-amino acid catabolic process	19/189	104/18866	5.91841e-19	1.34348e-16	9.78096e-17	TAT/RIDA/HPD/HAAO/AGXT/FTCD/CDO1/GPT/DAO/HGD/AMDHD1/PIPOX/OTC/MAT1A/AGXT2/SDS/UROC1/ALDH8A1/ARG1	19	geneontology_Biological_Process	Up
GO:0009063	GO:0009063	cellular amino acid catabolic process	20/189	124/18866	9.08903e-19	1.85689e-16	1.35187e-16	TAT/RIDA/HPD/HAAO/AGXT/FTCD/CDO1/GPT/DAO/HGD/AMDHD1/PIPOX/OTC/MAT1A/AGXT2/SDS/UROC1/ALDH8A1/CTH/ARG1	20	geneontology_Biological_Process	Up
GO:0006641	GO:0006641	triglyceride metabolic process	19/189	110/18866	1.80581e-18	3.35389e-16	2.44173e-16	SLC27A5/APOC1/APOC3/PCK1/PCK2/APOA5/RGN/INSIG1/MOGAT2/FABP4/APOA1/APOA2/CPS1/MFSD2A/GPLD1/APOH/FABP1/THRSP/CYP2E1	19	geneontology_Biological_Process	Up
GO:0006066	GO:0006066	alcohol metabolic process	30/189	385/18866	2.18602e-18	3.72169e-16	2.70951e-16	APOC1/RBP4/APOF/PCK1/RDH16/PON1/PCK2/TTR/APOA5/HAO1/SEC14L2/ADH1B/INSIG1/MOGAT2/CYP2C9/LCAT/APOA1/HMGCS2/CYP11A1/CYP2C8/ADH1C/ADH1A/SULT2A1/APOA2/CYP2D6/ADH4/AKR1C4/CYP3A4/CYP7A1/CYP1A2	30	geneontology_Biological_Process	Up
GO:0072330	GO:0072330	monocarboxylic acid biosynthetic process	25/189	246/18866	3.38628e-18	5.32168e-16	3.87435e-16	SLC27A5/APOC1/ACSM2A/ACSM2B/APOC3/CYP4A11/AGXT/APOA5/RGN/CYP8B1/INSIG1/ACSM5/CYP2C9/APOA1/SLC27A2/CYP2C8/SDS/BAAT/CYP2D6/ALDH8A1/AKR1C4/CYP3A4/CYP7A1/CYP1A2/CYP2E1	25	geneontology_Biological_Process	Up
GO:0006520	GO:0006520	cellular amino acid metabolic process	28/189	340/18866	7.71667e-18	1.0389e-15	7.56351e-16	TAT/RIDA/HPD/GLYATL1/HAAO/GLYAT/AGXT/FTCD/GNMT/CDO1/GPT/DAO/HGD/AMDHD1/PIPOX/OTC/MAT1A/UPB1/AGXT2/DPYS/SDS/BAAT/BHMT/UROC1/ALDH8A1/CPS1/CTH/ARG1	28	geneontology_Biological_Process	Up
GO:0006638	GO:0006638	neutral lipid metabolic process	20/189	138/18866	8.13626e-18	1.0389e-15	7.56351e-16	SLC27A5/APOC1/ANG/APOC3/PCK1/PCK2/APOA5/RGN/INSIG1/MOGAT2/FABP4/APOA1/APOA2/CPS1/MFSD2A/GPLD1/APOH/FABP1/THRSP/CYP2E1	20	geneontology_Biological_Process	Up
GO:0006639	GO:0006639	acylglycerol metabolic process	20/189	138/18866	8.13626e-18	1.0389e-15	7.56351e-16	SLC27A5/APOC1/ANG/APOC3/PCK1/PCK2/APOA5/RGN/INSIG1/MOGAT2/FABP4/APOA1/APOA2/CPS1/MFSD2A/GPLD1/APOH/FABP1/THRSP/CYP2E1	20	geneontology_Biological_Process	Up
GO:0006721	GO:0006721	terpenoid metabolic process	19/189	124/18866	1.89734e-17	2.28015e-15	1.66002e-15	RBP4/APOC3/RDH16/TTR/ADH1B/CYP2C9/APOA1/HMGCS2/CYP2C8/ADH1C/ADH1A/APOA2/CYP2D6/ALDH8A1/ADH4/AKR1C4/CYP3A4/CYP1A2/CYP2E1	19	geneontology_Biological_Process	Up
GO:0006720	GO:0006720	isoprenoid metabolic process	19/189	144/18866	3.37921e-16	3.8354e-14	2.79229e-14	RBP4/APOC3/RDH16/TTR/ADH1B/CYP2C9/APOA1/HMGCS2/CYP2C8/ADH1C/ADH1A/APOA2/CYP2D6/ALDH8A1/ADH4/AKR1C4/CYP3A4/CYP1A2/CYP2E1	19	geneontology_Biological_Process	Up
GO:0002576	GO:0002576	platelet degranulation	18/189	129/18866	7.62246e-16	8.19615e-14	5.96705e-14	A1BG/CLEC3B/ITIH3/HRG/SPP2/KNG1/APOA1/ORM2/PLG/SERPINF2/FGA/FGG/ORM1/ALB/FGB/SERPINA4/APOH/AHSG	18	geneontology_Biological_Process	Up
GO:0016042	GO:0016042	lipid catabolic process	26/189	343/18866	9.46143e-16	9.66485e-14	7.03632e-14	APOC1/APOC3/CYP4A11/PCK1/PCK2/CES2/CYP4F2/APOA5/HAO1/HSD17B6/FABP4/APOA1/LRCOL1/SLC27A2/SULT2A1/HAO2/APOA2/CPS1/MFSD2A/GPLD1/FABP1/HSD11B1/CYP3A4/CYP7A1/CYP1A2/PLA2G2A	26	geneontology_Biological_Process	Up
GO:0006805	GO:0006805	xenobiotic metabolic process	17/189	118/18866	2.88126e-15	2.80306e-13	2.04071e-13	ACSM2B/GLYAT/CYP2A6/CES2/PON3/CYP2C9/AKR7A3/CYP2A7/CYP2C8/CYP2B6/CYP2D6/GSTA1/NR1I2/CYP3A4/UGT2B15/CYP1A2/CYP2E1	17	geneontology_Biological_Process	Up
GO:0071466	GO:0071466	cellular response to xenobiotic stimulus	17/189	123/18866	5.88244e-15	5.46265e-13	3.97698e-13	ACSM2B/GLYAT/CYP2A6/CES2/PON3/CYP2C9/AKR7A3/CYP2A7/CYP2C8/CYP2B6/CYP2D6/GSTA1/NR1I2/CYP3A4/UGT2B15/CYP1A2/CYP2E1	17	geneontology_Biological_Process	Up
GO:0001523	GO:0001523	retinoid metabolic process	16/189	108/18866	1.23441e-14	1.09648e-12	7.98269e-13	RBP4/APOC3/RDH16/TTR/ADH1B/APOA1/CYP2C8/ADH1C/ADH1A/APOA2/CYP2D6/ALDH8A1/ADH4/AKR1C4/CYP3A4/CYP1A2	16	geneontology_Biological_Process	Up
GO:1901568	GO:1901568	fatty acid derivative metabolic process	19/189	175/18866	1.31984e-14	1.12351e-12	8.17952e-13	SLC27A5/ACSM2A/CYP4A22/CYP4A11/PON1/CYP2A6/CES2/CYP4F2/PON3/CYP2C9/HMGCS2/CYP2A7/CYP2C8/CYP2B6/CYP2D6/GSTA1/AKR1C4/CYP1A2/CYP2E1	19	geneontology_Biological_Process	Up
GO:0042738	GO:0042738	exogenous drug catabolic process	10/189	24/18866	1.39161e-14	1.13723e-12	8.27937e-13	CYP2A6/CYP2C9/CYP2A7/CYP2C8/CYP2B6/CYP2D6/NR1I2/CYP3A4/CYP1A2/CYP2E1	10	geneontology_Biological_Process	Up
GO:0009410	GO:0009410	response to xenobiotic stimulus	17/189	130/18866	1.5142e-14	1.18981e-12	8.66221e-13	ACSM2B/GLYAT/CYP2A6/CES2/PON3/CYP2C9/AKR7A3/CYP2A7/CYP2C8/CYP2B6/CYP2D6/GSTA1/NR1I2/CYP3A4/UGT2B15/CYP1A2/CYP2E1	17	geneontology_Biological_Process	Up
GO:0002526	GO:0002526	acute inflammatory response	16/189	111/18866	1.92727e-14	1.45831e-12	1.06169e-12	HPR/HP/SERPINC1/F12/KLKB1/TFR2/DNASE1L3/ORM2/SAA4/SERPINF2/F2/APOA2/ORM1/SAA1/AHSG/SAA2	16	geneontology_Biological_Process	Up
GO:0017144	GO:0017144	drug metabolic process	12/189	46/18866	2.07793e-14	1.51615e-12	1.1038e-12	CYP2A6/CYP4F2/CYP2C9/CYP2A7/CYP2C8/ADH1A/CYP2B6/CYP2D6/NR1I2/CYP3A4/CYP1A2/CYP2E1	12	geneontology_Biological_Process	Up
GO:0006869	GO:0006869	lipid transport	26/189	393/18866	2.41744e-14	1.70304e-12	1.23987e-12	SLC27A5/APOC1/RBP4/SLC10A1/APOC3/CFHR4/APOF/CYP4A11/PON1/CYP4F2/APOA5/SLC51A/LPA/FABP4/ABCB4/LCAT/AQP9/APOA1/SLC27A2/APOA2/MFSD2A/APOH/AKR1C4/FABP1/THRSP/PLA2G2A	26	geneontology_Biological_Process	Up
GO:0034754	GO:0034754	cellular hormone metabolic process	17/189	134/18866	2.53317e-14	1.72509e-12	1.25592e-12	RBP4/RDH16/TTR/ADH1B/HSD17B6/CYP2C9/CYP11A1/CYP2C8/ADH1C/ADH1A/CYP2D6/ALDH8A1/ADH4/AKR1C4/CYP3A4/UGT2B7/CYP1A2	17	geneontology_Biological_Process	Up
GO:0034308	GO:0034308	primary alcohol metabolic process	15/189	94/18866	2.7311e-14	1.79988e-12	1.31037e-12	RBP4/RDH16/TTR/HAO1/ADH1B/CYP11A1/CYP2C8/ADH1C/ADH1A/SULT2A1/CYP2D6/ADH4/AKR1C4/CYP3A4/CYP1A2	15	geneontology_Biological_Process	Up
GO:0016101	GO:0016101	diterpenoid metabolic process	16/189	114/18866	2.96861e-14	1.89527e-12	1.37982e-12	RBP4/APOC3/RDH16/TTR/ADH1B/APOA1/CYP2C8/ADH1C/ADH1A/APOA2/CYP2D6/ALDH8A1/ADH4/AKR1C4/CYP3A4/CYP1A2	16	geneontology_Biological_Process	Up
GO:0042730	GO:0042730	fibrinolysis	10/189	26/18866	3.7042e-14	2.22579e-12	1.62045e-12	F12/KLKB1/HRG/PLG/SERPINF2/F2/FGA/FGG/FGB/APOH	10	geneontology_Biological_Process	Up
GO:0042737	GO:0042737	drug catabolic process	10/189	26/18866	3.7042e-14	2.22579e-12	1.62045e-12	CYP2A6/CYP2C9/CYP2A7/CYP2C8/CYP2B6/CYP2D6/NR1I2/CYP3A4/CYP1A2/CYP2E1	10	geneontology_Biological_Process	Up
GO:0006690	GO:0006690	icosanoid metabolic process	16/189	122/18866	8.84159e-14	4.96634e-12	3.61565e-12	CYP4A22/CYP4A11/PON1/CYP2A6/CES2/CYP4F2/PON3/CYP2C9/CYP2A7/CYP2C8/CYP2B6/CYP2D6/GSTA1/AKR1C4/CYP1A2/CYP2E1	16	geneontology_Biological_Process	Up
GO:0072376	GO:0072376	protein activation cascade	10/189	28/18866	8.99435e-14	4.96634e-12	3.61565e-12	SERPINC1/F9/F12/KLKB1/KNG1/F2/FGA/FGG/FGB/APOH	10	geneontology_Biological_Process	Up
GO:0072378	GO:0072378	blood coagulation, fibrin clot formation	10/189	28/18866	8.99435e-14	4.96634e-12	3.61565e-12	SERPINC1/F9/F12/KLKB1/KNG1/F2/FGA/FGG/FGB/APOH	10	geneontology_Biological_Process	Up
GO:0019373	GO:0019373	epoxygenase P450 pathway	9/189	20/18866	1.28195e-13	6.89216e-12	5.01771e-12	CYP4A11/CYP2A6/CYP4F2/CYP2C9/CYP2A7/CYP2C8/CYP2B6/CYP1A2/CYP2E1	9	geneontology_Biological_Process	Up
GO:0019835	GO:0019835	cytolysis	10/189	29/18866	1.36098e-13	7.12944e-12	5.19046e-12	C6/C8A/CFHR2/C8B/HRG/F2/CFHR1/CFHR5/C9/PLA2G2A	10	geneontology_Biological_Process	Up
GO:0010876	GO:0010876	lipid localization	26/189	440/18866	3.35417e-13	1.71314e-11	1.24722e-11	SLC27A5/APOC1/RBP4/SLC10A1/APOC3/CFHR4/APOF/CYP4A11/PON1/CYP4F2/APOA5/SLC51A/LPA/FABP4/ABCB4/LCAT/AQP9/APOA1/SLC27A2/APOA2/MFSD2A/APOH/AKR1C4/FABP1/THRSP/PLA2G2A	26	geneontology_Biological_Process	Up
GO:0031638	GO:0031638	zymogen activation	12/189	58/18866	4.29019e-13	2.13777e-11	1.55636e-11	HPR/HP/F9/CLEC3B/F12/KLKB1/SERPINF2/FGA/FGG/FGB/APOH/HGFAC	12	geneontology_Biological_Process	Up
GO:0001676	GO:0001676	long-chain fatty acid metabolic process	15/189	113/18866	4.5078e-13	2.19272e-11	1.59637e-11	SLC27A5/CYP4A22/CYP4A11/CYP2A6/CYP4F2/CYP2C9/CYP2A7/SLC27A2/CYP2C8/CYP2B6/CYP2D6/GSTA1/CYP3A4/CYP1A2/CYP2E1	15	geneontology_Biological_Process	Up
GO:0042572	GO:0042572	retinol metabolic process	11/189	47/18866	9.68723e-13	4.60256e-11	3.35081e-11	RBP4/RDH16/TTR/ADH1B/CYP2C8/ADH1C/ADH1A/CYP2D6/ADH4/CYP3A4/CYP1A2	11	geneontology_Biological_Process	Up
GO:0016125	GO:0016125	sterol metabolic process	17/189	169/18866	1.21234e-12	5.62911e-11	4.09817e-11	APOC1/APOF/PON1/APOA5/SEC14L2/CYP8B1/INSIG1/CYP2C9/LCAT/APOA1/HMGCS2/CYP11A1/APOA2/CYP2D6/CYP3A4/CYP7A1/CYP1A2	17	geneontology_Biological_Process	Up
GO:0120254	GO:0120254	olefinic compound metabolic process	15/189	121/18866	1.25443e-12	5.6951e-11	4.14621e-11	CYP4A22/CYP4A11/CYP2A6/CYP4F2/CYP2C9/CYP2A7/CYP11A1/CYP2C8/CYP2B6/CYP2D6/ALDH8A1/GSTA1/AKR1C4/CYP1A2/CYP2E1	15	geneontology_Biological_Process	Up
GO:0006633	GO:0006633	fatty acid biosynthetic process	17/189	173/18866	1.77783e-12	7.89587e-11	5.74845e-11	APOC1/ACSM2A/ACSM2B/APOC3/CYP4A11/APOA5/RGN/INSIG1/ACSM5/CYP2C9/APOA1/CYP2C8/CYP2D6/CYP3A4/CYP7A1/CYP1A2/CYP2E1	17	geneontology_Biological_Process	Up
GO:0030195	GO:0030195	negative regulation of blood coagulation	11/189	50/18866	2.02413e-12	8.79851e-11	6.40559e-11	F12/KLKB1/HRG/KNG1/PLG/SERPINF2/F2/FGA/FGG/FGB/APOH	11	geneontology_Biological_Process	Up
GO:1900047	GO:1900047	negative regulation of hemostasis	11/189	51/18866	2.55845e-12	1.08894e-10	7.92782e-11	F12/KLKB1/HRG/KNG1/PLG/SERPINF2/F2/FGA/FGG/FGB/APOH	11	geneontology_Biological_Process	Up
GO:0008203	GO:0008203	cholesterol metabolic process	16/189	153/18866	3.13724e-12	1.30804e-10	9.52291e-11	APOC1/APOF/PON1/APOA5/SEC14L2/INSIG1/CYP2C9/LCAT/APOA1/HMGCS2/CYP11A1/APOA2/CYP2D6/CYP3A4/CYP7A1/CYP1A2	16	geneontology_Biological_Process	Up
GO:0050819	GO:0050819	negative regulation of coagulation	11/189	55/18866	6.20823e-12	2.53668e-10	1.84678e-10	F12/KLKB1/HRG/KNG1/PLG/SERPINF2/F2/FGA/FGG/FGB/APOH	11	geneontology_Biological_Process	Up
GO:1902652	GO:1902652	secondary alcohol metabolic process	16/189	162/18866	7.58572e-12	3.03875e-10	2.21231e-10	APOC1/APOF/PON1/APOA5/SEC14L2/INSIG1/CYP2C9/LCAT/APOA1/HMGCS2/CYP11A1/APOA2/CYP2D6/CYP3A4/CYP7A1/CYP1A2	16	geneontology_Biological_Process	Up
GO:0072329	GO:0072329	monocarboxylic acid catabolic process	15/189	138/18866	8.726e-12	3.42831e-10	2.49592e-10	DCXR/LDHD/CYP4A11/PCK1/PCK2/AGXT/CYP4F2/PON3/HAO1/SLC27A2/AGXT2/SULT2A1/HAO2/MFSD2A/FABP1	15	geneontology_Biological_Process	Up
GO:0019369	GO:0019369	arachidonic acid metabolic process	11/189	58/18866	1.151e-11	4.43676e-10	3.2301e-10	CYP4A22/CYP4A11/CYP2A6/CYP4F2/CYP2C9/CYP2A7/CYP2C8/CYP2B6/CYP2D6/CYP1A2/CYP2E1	11	geneontology_Biological_Process	Up
GO:0046486	GO:0046486	glycerolipid metabolic process	24/189	434/18866	1.18619e-11	4.48776e-10	3.26723e-10	SLC27A5/APOC1/ANG/APOC3/PCK1/PON1/PCK2/APOA5/RGN/ETNPPL/INSIG1/MOGAT2/FABP4/LCAT/APOA1/APOA2/CPS1/MFSD2A/GPLD1/APOH/FABP1/THRSP/CYP2E1/PLA2G2A	24	geneontology_Biological_Process	Up
GO:0033559	GO:0033559	unsaturated fatty acid metabolic process	14/189	118/18866	1.32746e-11	4.93091e-10	3.58986e-10	CYP4A22/CYP4A11/CYP2A6/CES2/CYP4F2/CYP2C9/CYP2A7/CYP2C8/CYP2B6/CYP2D6/GSTA1/AKR1C4/CYP1A2/CYP2E1	14	geneontology_Biological_Process	Up
GO:0034368	GO:0034368	protein-lipid complex remodeling	9/189	31/18866	1.39948e-11	5.01602e-10	3.65182e-10	APOC1/APOC3/APOA5/LPA/LCAT/APOA1/APOA2/ALB/PLA2G2A	9	geneontology_Biological_Process	Up
GO:0034369	GO:0034369	plasma lipoprotein particle remodeling	9/189	31/18866	1.39948e-11	5.01602e-10	3.65182e-10	APOC1/APOC3/APOA5/LPA/LCAT/APOA1/APOA2/ALB/PLA2G2A	9	geneontology_Biological_Process	Up
GO:0034367	GO:0034367	protein-containing complex remodeling	9/189	32/18866	1.93038e-11	6.79961e-10	4.95033e-10	APOC1/APOC3/APOA5/LPA/LCAT/APOA1/APOA2/ALB/PLA2G2A	9	geneontology_Biological_Process	Up
GO:0051917	GO:0051917	regulation of fibrinolysis	7/189	14/18866	2.93031e-11	1.01468e-09	7.38721e-10	F12/KLKB1/HRG/PLG/SERPINF2/F2/APOH	7	geneontology_Biological_Process	Up
GO:0006953	GO:0006953	acute-phase response	10/189	47/18866	3.01044e-11	1.02505e-09	7.46272e-10	HP/TFR2/ORM2/SAA4/SERPINF2/F2/ORM1/SAA1/AHSG/SAA2	10	geneontology_Biological_Process	Up
GO:0030193	GO:0030193	regulation of blood coagulation	12/189	82/18866	3.23447e-11	1.08328e-09	7.88664e-10	SERPINC1/F12/KLKB1/HRG/KNG1/PLG/SERPINF2/F2/FGA/FGG/FGB/APOH	12	geneontology_Biological_Process	Up
GO:1900046	GO:1900046	regulation of hemostasis	12/189	83/18866	3.74839e-11	1.22265e-09	8.90126e-10	SERPINC1/F12/KLKB1/HRG/KNG1/PLG/SERPINF2/F2/FGA/FGG/FGB/APOH	12	geneontology_Biological_Process	Up
GO:0031639	GO:0031639	plasminogen activation	8/189	23/18866	3.77028e-11	1.22265e-09	8.90126e-10	CLEC3B/F12/KLKB1/SERPINF2/FGA/FGG/FGB/APOH	8	geneontology_Biological_Process	Up
GO:0071827	GO:0071827	plasma lipoprotein particle organization	10/189	51/18866	7.17585e-11	2.29067e-09	1.66768e-09	APOC1/APOC3/APOA5/LPA/LCAT/APOA1/APOA2/MFSD2A/ALB/PLA2G2A	10	geneontology_Biological_Process	Up
GO:0050818	GO:0050818	regulation of coagulation	12/189	88/18866	7.61007e-11	2.3919e-09	1.74138e-09	SERPINC1/F12/KLKB1/HRG/KNG1/PLG/SERPINF2/F2/FGA/FGG/FGB/APOH	12	geneontology_Biological_Process	Up
GO:0042445	GO:0042445	hormone metabolic process	17/189	221/18866	9.02204e-11	2.79273e-09	2.0332e-09	RBP4/RDH16/TTR/ADH1B/HSD17B6/CYP2C9/CYP11A1/CYP2C8/ADH1C/ADH1A/CYP2D6/ALDH8A1/ADH4/AKR1C4/CYP3A4/UGT2B7/CYP1A2	17	geneontology_Biological_Process	Up
GO:0071825	GO:0071825	protein-lipid complex subunit organization	10/189	55/18866	1.58667e-10	4.83815e-09	3.52233e-09	APOC1/APOC3/APOA5/LPA/LCAT/APOA1/APOA2/MFSD2A/ALB/PLA2G2A	10	geneontology_Biological_Process	Up
GO:0009069	GO:0009069	serine family amino acid metabolic process	9/189	40/18866	1.75649e-10	5.27722e-09	3.84198e-09	RIDA/GLYAT/AGXT/CDO1/DAO/AGXT2/SDS/BAAT/CTH	9	geneontology_Biological_Process	Up
GO:0015718	GO:0015718	monocarboxylic acid transport	15/189	174/18866	2.4419e-10	7.23015e-09	5.26378e-09	SLC27A5/SLC10A1/CYP4A11/CYP4F2/SLC51A/FABP4/ABCB4/AQP9/SLC27A2/SLC38A3/MFSD2A/AKR1C4/FABP1/THRSP/PLA2G2A	15	geneontology_Biological_Process	Up
GO:0044242	GO:0044242	cellular lipid catabolic process	17/189	236/18866	2.51978e-10	7.35415e-09	5.35406e-09	APOC1/APOC3/CYP4A11/PCK1/PCK2/CYP4F2/APOA5/HAO1/FABP4/APOA1/SLC27A2/HAO2/APOA2/CPS1/MFSD2A/GPLD1/FABP1	17	geneontology_Biological_Process	Up
GO:0007597	GO:0007597	blood coagulation, intrinsic pathway	7/189	18/18866	2.62664e-10	7.55807e-09	5.50251e-09	SERPINC1/F9/F12/KLKB1/KNG1/F2/APOH	7	geneontology_Biological_Process	Up
GO:0061045	GO:0061045	negative regulation of wound healing	11/189	78/18866	3.30522e-10	9.37857e-09	6.82789e-09	F12/KLKB1/HRG/KNG1/PLG/SERPINF2/F2/FGA/FGG/FGB/APOH	11	geneontology_Biological_Process	Up
GO:0019216	GO:0019216	regulation of lipid metabolic process	22/189	431/18866	4.15897e-10	1.16394e-08	8.47387e-09	APOC1/APOC3/CYP4A11/PCK1/TM6SF2/APOA5/SEC14L2/RGN/INSIG1/ABCB4/APOA1/HMGCS2/F2/ANGPTL4/SULT2A1/APOA2/MFSD2A/GPLD1/FABP1/THRSP/HSD17B13/CYP7A1	22	geneontology_Biological_Process	Up
GO:0055088	GO:0055088	lipid homeostasis	14/189	163/18866	1.03779e-09	2.86513e-08	2.0859e-08	ACSM2A/APOC3/TM6SF2/NR1I3/APOA5/INSIG1/FABP4/ABCB4/LCAT/APOA1/ANGPTL4/APOA2/NR1I2/CYP7A1	14	geneontology_Biological_Process	Up
GO:0006694	GO:0006694	steroid biosynthetic process	15/189	197/18866	1.38607e-09	3.77565e-08	2.7488e-08	SLC27A5/APOA5/SEC14L2/CYP8B1/HSD17B6/INSIG1/APOA1/HMGCS2/SLC27A2/CYP11A1/BAAT/AKR1C4/HSD11B1/CYP3A4/CYP7A1	15	geneontology_Biological_Process	Up
GO:0007596	GO:0007596	blood coagulation	19/189	343/18866	1.82452e-09	4.90459e-08	3.5707e-08	SERPINC1/F9/CYP4F2/F12/KLKB1/HRG/C4BPB/KNG1/PLG/SERPINF2/PROZ/F2/FGA/F13B/FGG/SAA1/FGB/APOH/HGFAC	19	geneontology_Biological_Process	Up
GO:1903035	GO:1903035	negative regulation of response to wounding	11/189	93/18866	2.27408e-09	6.03368e-08	4.39271e-08	F12/KLKB1/HRG/KNG1/PLG/SERPINF2/F2/FGA/FGG/FGB/APOH	11	geneontology_Biological_Process	Up
GO:0007599	GO:0007599	hemostasis	19/189	348/18866	2.31712e-09	6.06907e-08	4.41848e-08	SERPINC1/F9/CYP4F2/F12/KLKB1/HRG/C4BPB/KNG1/PLG/SERPINF2/PROZ/F2/FGA/F13B/FGG/SAA1/FGB/APOH/HGFAC	19	geneontology_Biological_Process	Up
GO:0050817	GO:0050817	coagulation	19/189	349/18866	2.42936e-09	6.2825e-08	4.57386e-08	SERPINC1/F9/CYP4F2/F12/KLKB1/HRG/C4BPB/KNG1/PLG/SERPINF2/PROZ/F2/FGA/F13B/FGG/SAA1/FGB/APOH/HGFAC	19	geneontology_Biological_Process	Up
GO:0046942	GO:0046942	carboxylic acid transport	19/189	350/18866	2.54661e-09	6.5034e-08	4.73468e-08	SLC27A5/SLC10A1/CYP4A11/AGXT/CYP4F2/SLC51A/SLC13A5/FABP4/ABCB4/AQP9/SLC25A47/SLC27A2/SLC38A3/MFSD2A/AKR1C4/FABP1/ARG1/THRSP/PLA2G2A	19	geneontology_Biological_Process	Up
GO:0015849	GO:0015849	organic acid transport	19/189	353/18866	2.93056e-09	7.39151e-08	5.38126e-08	SLC27A5/SLC10A1/CYP4A11/AGXT/CYP4F2/SLC51A/SLC13A5/FABP4/ABCB4/AQP9/SLC25A47/SLC27A2/SLC38A3/MFSD2A/AKR1C4/FABP1/ARG1/THRSP/PLA2G2A	19	geneontology_Biological_Process	Up
GO:0006544	GO:0006544	glycine metabolic process	6/189	16/18866	6.87867e-09	1.7138e-07	1.2477e-07	RIDA/GLYAT/AGXT/AGXT2/SDS/BAAT	6	geneontology_Biological_Process	Up
GO:0097006	GO:0097006	regulation of plasma lipoprotein particle levels	11/189	105/18866	8.37452e-09	2.04561e-07	1.48927e-07	APOC1/APOC3/APOA5/LPA/LCAT/APOA1/APOA2/MFSD2A/GPLD1/ALB/PLA2G2A	11	geneontology_Biological_Process	Up
GO:0042180	GO:0042180	cellular ketone metabolic process	16/189	260/18866	8.41073e-09	2.04561e-07	1.48927e-07	APOC1/APOC3/CYP4F2/APOA5/RGN/INSIG1/APOA1/CYP11A1/CYP2B6/BHMT/ALDH8A1/MFSD2A/ADH4/AKR1C4/FABP1/CYP7A1	16	geneontology_Biological_Process	Up
GO:0006959	GO:0006959	humoral immune response	19/189	377/18866	8.57222e-09	2.06036e-07	1.50001e-07	ANG/HPX/CFHR4/C6/MASP2/C8A/CFHR2/C8B/HRG/C4BPB/F2/FGA/C4BPA/PGLYRP2/FGB/CFHR1/CFHR5/C9/PLA2G2A	19	geneontology_Biological_Process	Up
GO:0009074	GO:0009074	aromatic amino acid family catabolic process	7/189	28/18866	8.97915e-09	2.13307e-07	1.55294e-07	TAT/HPD/HAAO/FTCD/HGD/AMDHD1/UROC1	7	geneontology_Biological_Process	Up
GO:0002920	GO:0002920	regulation of humoral immune response	12/189	134/18866	1.0464e-08	2.45724e-07	1.78895e-07	HPX/CFHR4/C6/C8A/CFHR2/C8B/C4BPB/F2/C4BPA/CFHR1/CFHR5/C9	12	geneontology_Biological_Process	Up
GO:0002697	GO:0002697	regulation of immune effector process	21/189	470/18866	1.12466e-08	2.611e-07	1.90089e-07	RBP4/HPX/CFHR4/C6/AZGP1/C8A/PCK1/CFHR2/C8B/IL27/DNASE1L3/C4BPB/APOA1/F2/C4BPA/APOA2/PGLYRP2/ARG1/CFHR1/CFHR5/C9	21	geneontology_Biological_Process	Up
GO:0008652	GO:0008652	cellular amino acid biosynthetic process	10/189	84/18866	1.16537e-08	2.67511e-07	1.94756e-07	AGXT/CDO1/GPT/OTC/UPB1/AGXT2/SDS/BHMT/CPS1/CTH	10	geneontology_Biological_Process	Up
GO:0034375	GO:0034375	high-density lipoprotein particle remodeling	6/189	18/18866	1.56822e-08	3.55987e-07	2.59169e-07	APOC1/APOC3/LCAT/APOA1/APOA2/ALB	6	geneontology_Biological_Process	Up
GO:0034377	GO:0034377	plasma lipoprotein particle assembly	7/189	31/18866	1.94414e-08	4.36471e-07	3.17764e-07	APOC1/APOC3/APOA5/LCAT/APOA1/APOA2/MFSD2A	7	geneontology_Biological_Process	Up
GO:0042493	GO:0042493	response to drug	19/189	397/18866	1.96988e-08	4.37441e-07	3.18471e-07	SLC22A1/CYP2A6/FBP1/CYP2C9/APOA1/OTC/CYP2A7/CYP2C8/CYP2B6/APOA2/CYP2D6/CPS1/GPLD1/NR1I2/IGFBP2/ARG1/CYP3A4/CYP1A2/CYP2E1	19	geneontology_Biological_Process	Up
GO:0030449	GO:0030449	regulation of complement activation	11/189	115/18866	2.19285e-08	4.8172e-07	3.50707e-07	CFHR4/C6/C8A/CFHR2/C8B/C4BPB/F2/C4BPA/CFHR1/CFHR5/C9	11	geneontology_Biological_Process	Up
GO:0051918	GO:0051918	negative regulation of fibrinolysis	5/189	10/18866	2.31557e-08	4.98619e-07	3.6301e-07	HRG/PLG/SERPINF2/F2/APOH	5	geneontology_Biological_Process	Up
GO:0046461	GO:0046461	neutral lipid catabolic process	8/189	48/18866	2.343e-08	4.98619e-07	3.6301e-07	APOC3/APOA5/FABP4/APOA1/APOA2/CPS1/GPLD1/FABP1	8	geneontology_Biological_Process	Up
GO:0046464	GO:0046464	acylglycerol catabolic process	8/189	48/18866	2.343e-08	4.98619e-07	3.6301e-07	APOC3/APOA5/FABP4/APOA1/APOA2/CPS1/GPLD1/FABP1	8	geneontology_Biological_Process	Up
GO:0046460	GO:0046460	neutral lipid biosynthetic process	8/189	51/18866	3.85365e-08	8.03367e-07	5.84877e-07	ANG/PCK1/PCK2/RGN/MOGAT2/MFSD2A/GPLD1/THRSP	8	geneontology_Biological_Process	Up
GO:0046463	GO:0046463	acylglycerol biosynthetic process	8/189	51/18866	3.85365e-08	8.03367e-07	5.84877e-07	ANG/PCK1/PCK2/RGN/MOGAT2/MFSD2A/GPLD1/THRSP	8	geneontology_Biological_Process	Up
GO:0061041	GO:0061041	regulation of wound healing	12/189	151/18866	4.01268e-08	8.2807e-07	6.02861e-07	SERPINC1/F12/KLKB1/HRG/KNG1/PLG/SERPINF2/F2/FGA/FGG/FGB/APOH	12	geneontology_Biological_Process	Up
GO:0034372	GO:0034372	very-low-density lipoprotein particle remodeling	5/189	11/18866	4.21074e-08	8.60254e-07	6.26292e-07	APOC3/APOA5/LCAT/APOA1/APOA2	5	geneontology_Biological_Process	Up
GO:0065005	GO:0065005	protein-lipid complex assembly	7/189	35/18866	4.80625e-08	9.72196e-07	7.07789e-07	APOC1/APOC3/APOA5/LCAT/APOA1/APOA2/MFSD2A	7	geneontology_Biological_Process	Up
GO:0046503	GO:0046503	glycerolipid catabolic process	9/189	74/18866	5.29784e-08	1.05423e-06	7.67512e-07	APOC1/APOC3/APOA5/FABP4/APOA1/APOA2/CPS1/GPLD1/FABP1	9	geneontology_Biological_Process	Up
GO:1901617	GO:1901617	organic hydroxy compound biosynthetic process	15/189	258/18866	5.31501e-08	1.05423e-06	7.67512e-07	SLC27A5/PCK1/PCK2/APOA5/SEC14L2/CYP8B1/DAO/INSIG1/APOA1/HMGCS2/SLC27A2/BAAT/AKR1C4/CYP3A4/CYP7A1	15	geneontology_Biological_Process	Up
GO:0009064	GO:0009064	glutamine family amino acid metabolic process	9/189	75/18866	5.9687e-08	1.17251e-06	8.53621e-07	TAT/GLYATL1/FTCD/DAO/AMDHD1/OTC/UROC1/CPS1/ARG1	9	geneontology_Biological_Process	Up
GO:0051346	GO:0051346	negative regulation of hydrolase activity	20/189	473/18866	6.36019e-08	1.22623e-06	8.92734e-07	APOC1/SERPINC1/APOC3/RGN/AMBP/ITIH3/HRG/SPP2/ITIH1/LPA/KNG1/SERPINA11/FETUB/APOA1/SERPINF2/ANGPTL4/APOA2/SERPINA4/FABP1/AHSG	20	geneontology_Biological_Process	Up
GO:0046364	GO:0046364	monosaccharide biosynthetic process	10/189	100/18866	6.36223e-08	1.22623e-06	8.92734e-07	RBP4/PCK1/PCK2/ALDOB/PFKFB1/GNMT/RGN/FBP1/GPT/SDS	10	geneontology_Biological_Process	Up
GO:0042632	GO:0042632	cholesterol homeostasis	10/189	101/18866	7.0006e-08	1.33666e-06	9.73128e-07	APOC3/NR1I3/APOA5/INSIG1/FABP4/LCAT/APOA1/APOA2/NR1I2/CYP7A1	10	geneontology_Biological_Process	Up
GO:0033700	GO:0033700	phospholipid efflux	5/189	12/18866	7.1598e-08	1.35439e-06	9.86042e-07	APOC1/APOC3/APOA5/APOA1/APOA2	5	geneontology_Biological_Process	Up
GO:0055092	GO:0055092	sterol homeostasis	10/189	102/18866	7.69473e-08	1.44223e-06	1.04999e-06	APOC3/NR1I3/APOA5/INSIG1/FABP4/LCAT/APOA1/APOA2/NR1I2/CYP7A1	10	geneontology_Biological_Process	Up
GO:0015850	GO:0015850	organic hydroxy compound transport	15/189	268/18866	8.75454e-08	1.6186e-06	1.17839e-06	SLC27A5/APOC1/RBP4/SLC10A1/APOC3/SLC22A1/PON1/APOA5/SLC51A/ABCB4/LCAT/AQP9/APOA1/APOA2/AKR1C4	15	geneontology_Biological_Process	Up
GO:0019433	GO:0019433	triglyceride catabolic process	7/189	38/18866	8.79416e-08	1.6186e-06	1.17839e-06	APOC3/APOA5/FABP4/APOA1/CPS1/GPLD1/FABP1	7	geneontology_Biological_Process	Up
GO:0030258	GO:0030258	lipid modification	15/189	271/18866	1.0124e-07	1.84672e-06	1.34447e-06	APOC1/CYP4A22/APOA5/HAO1/LCAT/APOA1/SLC27A2/CYP2C8/HAO2/APOA2/MFSD2A/ADH4/FABP1/CYP3A4/CYP2E1	15	geneontology_Biological_Process	Up
GO:0051004	GO:0051004	regulation of lipoprotein lipase activity	6/189	24/18866	1.08155e-07	1.95541e-06	1.4236e-06	APOC1/APOC3/APOA5/APOA1/ANGPTL4/APOH	6	geneontology_Biological_Process	Up
GO:0034370	GO:0034370	triglyceride-rich lipoprotein particle remodeling	5/189	13/18866	1.15402e-07	2.06813e-06	1.50566e-06	APOC3/APOA5/LCAT/APOA1/APOA2	5	geneontology_Biological_Process	Up
GO:0000096	GO:0000096	sulfur amino acid metabolic process	7/189	40/18866	1.27735e-07	2.24968e-06	1.63784e-06	AGXT/GNMT/CDO1/MAT1A/BHMT/CPS1/CTH	7	geneontology_Biological_Process	Up
GO:0009072	GO:0009072	aromatic amino acid family metabolic process	7/189	40/18866	1.27735e-07	2.24968e-06	1.63784e-06	TAT/HPD/HAAO/FTCD/HGD/AMDHD1/UROC1	7	geneontology_Biological_Process	Up
GO:0050994	GO:0050994	regulation of lipid catabolic process	8/189	60/18866	1.43387e-07	2.50376e-06	1.82282e-06	APOC1/APOC3/APOA5/APOA1/APOA2/MFSD2A/GPLD1/FABP1	8	geneontology_Biological_Process	Up
GO:0046890	GO:0046890	regulation of lipid biosynthetic process	13/189	207/18866	1.74311e-07	2.99826e-06	2.18283e-06	APOC1/APOC3/PCK1/APOA5/SEC14L2/RGN/INSIG1/APOA1/MFSD2A/GPLD1/THRSP/HSD17B13/CYP7A1	13	geneontology_Biological_Process	Up
GO:0010038	GO:0010038	response to metal ion	17/189	366/18866	1.74642e-07	2.99826e-06	2.18283e-06	TAT/HAAO/CD14/FBP1/TFR2/FABP4/AQP9/OTC/FGA/FGG/CPS1/GPLD1/FGB/IGFBP2/MT1X/ARG1/CYP1A2	17	geneontology_Biological_Process	Up
GO:0051873	GO:0051873	killing by host of symbiont cells	6/189	26/18866	1.81945e-07	3.09761e-06	2.25516e-06	CFHR2/HRG/F2/ARG1/CFHR1/CFHR5	6	geneontology_Biological_Process	Up
GO:0006790	GO:0006790	sulfur compound metabolic process	17/189	371/18866	2.11667e-07	3.57384e-06	2.60187e-06	ACSM2A/ACSM2B/GLYAT/AGXT/GNMT/CDO1/ACSM5/PIPOX/HMGCS2/MAT1A/BAAT/SULT2A1/BHMT/CPS1/CTH/ACOT12/GSTA1	17	geneontology_Biological_Process	Up
GO:0019432	GO:0019432	triglyceride biosynthetic process	7/189	43/18866	2.15253e-07	3.5753e-06	2.60293e-06	PCK1/PCK2/RGN/MOGAT2/MFSD2A/GPLD1/THRSP	7	geneontology_Biological_Process	Up
GO:0090207	GO:0090207	regulation of triglyceride metabolic process	7/189	43/18866	2.15253e-07	3.5753e-06	2.60293e-06	APOC3/APOA5/RGN/APOA1/MFSD2A/GPLD1/THRSP	7	geneontology_Biological_Process	Up
GO:0006706	GO:0006706	steroid catabolic process	6/189	27/18866	2.31989e-07	3.8222e-06	2.78268e-06	HSD17B6/SULT2A1/HSD11B1/CYP3A4/CYP7A1/CYP1A2	6	geneontology_Biological_Process	Up
GO:0046470	GO:0046470	phosphatidylcholine metabolic process	9/189	88/18866	2.42801e-07	3.96834e-06	2.88908e-06	APOC1/PON1/APOA5/LCAT/APOA1/APOA2/MFSD2A/GPLD1/PLA2G2A	9	geneontology_Biological_Process	Up
GO:0006956	GO:0006956	complement activation	12/189	178/18866	2.44929e-07	3.97136e-06	2.89127e-06	CFHR4/C6/MASP2/C8A/CFHR2/C8B/C4BPB/F2/C4BPA/CFHR1/CFHR5/C9	12	geneontology_Biological_Process	Up
GO:0006006	GO:0006006	glucose metabolic process	13/189	214/18866	2.55977e-07	4.11781e-06	2.9979e-06	RBP4/DCXR/PCK1/PCK2/ALDOB/PFKFB1/GNMT/RGN/FBP1/GPT/GCGR/SDS/GPLD1	13	geneontology_Biological_Process	Up
GO:0030194	GO:0030194	positive regulation of blood coagulation	6/189	28/18866	2.9281e-07	4.60162e-06	3.35012e-06	F12/HRG/PLG/SERPINF2/F2/APOH	6	geneontology_Biological_Process	Up
GO:0051883	GO:0051883	killing of cells in other organism involved in symbiotic interaction	6/189	28/18866	2.9281e-07	4.60162e-06	3.35012e-06	CFHR2/HRG/F2/ARG1/CFHR1/CFHR5	6	geneontology_Biological_Process	Up
GO:1900048	GO:1900048	positive regulation of hemostasis	6/189	28/18866	2.9281e-07	4.60162e-06	3.35012e-06	F12/HRG/PLG/SERPINF2/F2/APOH	6	geneontology_Biological_Process	Up
GO:0005996	GO:0005996	monosaccharide metabolic process	15/189	296/18866	3.16435e-07	4.93493e-06	3.59279e-06	RBP4/DCXR/PCK1/PCK2/ALDOB/PFKFB1/GNMT/RGN/FBP1/GPT/GCGR/SDS/GPLD1/UGT2B7/UGT2B15	15	geneontology_Biological_Process	Up
GO:0006094	GO:0006094	gluconeogenesis	9/189	91/18866	3.2459e-07	5.02377e-06	3.65746e-06	RBP4/PCK1/PCK2/ALDOB/PFKFB1/GNMT/FBP1/GPT/SDS	9	geneontology_Biological_Process	Up
GO:1903034	GO:1903034	regulation of response to wounding	12/189	183/18866	3.30475e-07	5.07639e-06	3.69578e-06	SERPINC1/F12/KLKB1/HRG/KNG1/PLG/SERPINF2/F2/FGA/FGG/FGB/APOH	12	geneontology_Biological_Process	Up
GO:0010951	GO:0010951	negative regulation of endopeptidase activity	14/189	258/18866	3.48533e-07	5.31382e-06	3.86863e-06	SERPINC1/AMBP/ITIH3/HRG/SPP2/ITIH1/LPA/KNG1/SERPINA11/FETUB/SERPINF2/SERPINA4/FABP1/AHSG	14	geneontology_Biological_Process	Up
GO:0050820	GO:0050820	positive regulation of coagulation	6/189	29/18866	3.66133e-07	5.54082e-06	4.03389e-06	F12/HRG/PLG/SERPINF2/F2/APOH	6	geneontology_Biological_Process	Up
GO:0016485	GO:0016485	protein processing	13/189	223/18866	4.1059e-07	6.16414e-06	4.48769e-06	HPR/HP/F9/CLEC3B/HJV/F12/KLKB1/SERPINF2/FGA/FGG/FGB/APOH/HGFAC	13	geneontology_Biological_Process	Up
GO:0045834	GO:0045834	positive regulation of lipid metabolic process	11/189	153/18866	4.13356e-07	6.16414e-06	4.48769e-06	APOC1/APOA5/RGN/APOA1/F2/APOA2/MFSD2A/GPLD1/FABP1/HSD17B13/CYP7A1	11	geneontology_Biological_Process	Up
GO:0019319	GO:0019319	hexose biosynthetic process	9/189	94/18866	4.29297e-07	6.35547e-06	4.62698e-06	RBP4/PCK1/PCK2/ALDOB/PFKFB1/GNMT/FBP1/GPT/SDS	9	geneontology_Biological_Process	Up
GO:0008206	GO:0008206	bile acid metabolic process	7/189	48/18866	4.71485e-07	6.92981e-06	5.04512e-06	SLC27A5/CYP8B1/SLC27A2/BAAT/SULT2A1/AKR1C4/CYP7A1	7	geneontology_Biological_Process	Up
GO:0010466	GO:0010466	negative regulation of peptidase activity	14/189	272/18866	6.58761e-07	9.6132e-06	6.99871e-06	SERPINC1/AMBP/ITIH3/HRG/SPP2/ITIH1/LPA/KNG1/SERPINA11/FETUB/SERPINF2/SERPINA4/FABP1/AHSG	14	geneontology_Biological_Process	Up
GO:0034433	GO:0034433	steroid esterification	5/189	18/18866	7.37604e-07	1.04648e-05	7.61867e-06	APOC1/APOA5/LCAT/APOA1/APOA2	5	geneontology_Biological_Process	Up
GO:0034434	GO:0034434	sterol esterification	5/189	18/18866	7.37604e-07	1.04648e-05	7.61867e-06	APOC1/APOA5/LCAT/APOA1/APOA2	5	geneontology_Biological_Process	Up
GO:0034435	GO:0034435	cholesterol esterification	5/189	18/18866	7.37604e-07	1.04648e-05	7.61867e-06	APOC1/APOA5/LCAT/APOA1/APOA2	5	geneontology_Biological_Process	Up
GO:0060192	GO:0060192	negative regulation of lipase activity	5/189	18/18866	7.37604e-07	1.04648e-05	7.61867e-06	APOC1/APOC3/APOA1/ANGPTL4/APOA2	5	geneontology_Biological_Process	Up
GO:0015908	GO:0015908	fatty acid transport	9/189	101/18866	7.93634e-07	1.11055e-05	8.08511e-06	SLC27A5/CYP4A11/CYP4F2/FABP4/SLC27A2/MFSD2A/FABP1/THRSP/PLA2G2A	9	geneontology_Biological_Process	Up
GO:0019217	GO:0019217	regulation of fatty acid metabolic process	9/189	101/18866	7.93634e-07	1.11055e-05	8.08511e-06	APOC1/APOC3/APOA5/RGN/INSIG1/APOA1/MFSD2A/FABP1/CYP7A1	9	geneontology_Biological_Process	Up
GO:0042573	GO:0042573	retinoic acid metabolic process	6/189	33/18866	8.25727e-07	1.14759e-05	8.35483e-06	ADH1B/CYP2C8/ADH1C/ADH1A/ALDH8A1/CYP3A4	6	geneontology_Biological_Process	Up
GO:0070989	GO:0070989	oxidative demethylation	5/189	19/18866	9.92916e-07	1.36341e-05	9.92603e-06	CYP2C9/CYP2C8/CYP2D6/CYP3A4/CYP1A2	5	geneontology_Biological_Process	Up
GO:0042759	GO:0042759	long-chain fatty acid biosynthetic process	6/189	34/18866	9.94359e-07	1.36341e-05	9.92603e-06	CYP2C9/CYP2C8/CYP2D6/CYP3A4/CYP1A2/CYP2E1	6	geneontology_Biological_Process	Up
GO:0042304	GO:0042304	regulation of fatty acid biosynthetic process	7/189	55/18866	1.22486e-06	1.66826e-05	1.21454e-05	APOC1/APOC3/APOA5/RGN/INSIG1/APOA1/CYP7A1	7	geneontology_Biological_Process	Up
GO:0033762	GO:0033762	response to glucagon	6/189	36/18866	1.41634e-06	1.91628e-05	1.39511e-05	PCK1/PFKFB1/CDO1/GCGR/CPS1/ARG1	6	geneontology_Biological_Process	Up
GO:0009636	GO:0009636	response to toxic substance	13/189	250/18866	1.49153e-06	2.00473e-05	1.45951e-05	HP/GLYAT/PON1/PON3/RGN/AKR7A3/CPS1/ALB/ADH4/GSTA1/FABP1/MT1X/ARG1	13	geneontology_Biological_Process	Up
GO:0019748	GO:0019748	secondary metabolic process	7/189	57/18866	1.5691e-06	2.09521e-05	1.52538e-05	CYP2A6/PON3/AKR7A3/CYP2A7/CYP2D6/AKR1C4/CYP1A2	7	geneontology_Biological_Process	Up
GO:0051604	GO:0051604	protein maturation	14/189	293/18866	1.59302e-06	2.11334e-05	1.53858e-05	HPR/HP/F9/CLEC3B/HJV/F12/KLKB1/TFR2/SERPINF2/FGA/FGG/FGB/APOH/HGFAC	14	geneontology_Biological_Process	Up
GO:0006699	GO:0006699	bile acid biosynthetic process	6/189	37/18866	1.67647e-06	2.20969e-05	1.60873e-05	SLC27A5/CYP8B1/SLC27A2/BAAT/AKR1C4/CYP7A1	6	geneontology_Biological_Process	Up
GO:0019318	GO:0019318	hexose metabolic process	13/189	254/18866	1.77968e-06	2.33069e-05	1.69682e-05	RBP4/DCXR/PCK1/PCK2/ALDOB/PFKFB1/GNMT/RGN/FBP1/GPT/GCGR/SDS/GPLD1	13	geneontology_Biological_Process	Up
GO:0006067	GO:0006067	ethanol metabolic process	5/189	22/18866	2.19442e-06	2.84864e-05	2.0739e-05	ADH1B/ADH1C/ADH1A/SULT2A1/ADH4	5	geneontology_Biological_Process	Up
GO:0009062	GO:0009062	fatty acid catabolic process	9/189	114/18866	2.20306e-06	2.84864e-05	2.0739e-05	CYP4A11/PCK1/PCK2/CYP4F2/HAO1/SLC27A2/HAO2/MFSD2A/FABP1	9	geneontology_Biological_Process	Up
GO:0051384	GO:0051384	response to glucocorticoid	10/189	147/18866	2.32539e-06	2.9879e-05	2.17529e-05	TAT/PCK1/PCK2/AGXT/PFKFB1/CDO1/APOA2/CPS1/IGFBP2/ARG1	10	geneontology_Biological_Process	Up
GO:0050995	GO:0050995	negative regulation of lipid catabolic process	5/189	24/18866	3.48471e-06	4.40245e-05	3.20512e-05	APOC1/APOC3/APOA2/MFSD2A/GPLD1	5	geneontology_Biological_Process	Up
GO:0090208	GO:0090208	positive regulation of triglyceride metabolic process	5/189	24/18866	3.48471e-06	4.40245e-05	3.20512e-05	APOA5/RGN/APOA1/MFSD2A/GPLD1	5	geneontology_Biological_Process	Up
GO:0045017	GO:0045017	glycerolipid biosynthetic process	13/189	270/18866	3.49093e-06	4.40245e-05	3.20512e-05	ANG/PCK1/PCK2/RGN/ETNPPL/MOGAT2/LCAT/APOA1/APOA2/MFSD2A/GPLD1/THRSP/PLA2G2A	13	geneontology_Biological_Process	Up
GO:0062012	GO:0062012	regulation of small molecule metabolic process	17/189	456/18866	3.60978e-06	4.52441e-05	3.29392e-05	APOC1/APOC3/PFKFB1/APOA5/GNMT/SEC14L2/RGN/FBP1/GPT/INSIG1/APOA1/GCGR/BHMT/MFSD2A/GPLD1/FABP1/CYP7A1	17	geneontology_Biological_Process	Up
GO:1901607	GO:1901607	alpha-amino acid biosynthetic process	7/189	66/18866	4.28407e-06	5.33298e-05	3.88258e-05	AGXT/OTC/AGXT2/SDS/BHMT/CPS1/CTH	7	geneontology_Biological_Process	Up
GO:0051702	GO:0051702	interaction with symbiont	8/189	93/18866	4.30711e-06	5.33298e-05	3.88258e-05	CFHR2/HRG/PLG/F2/ARG1/CFHR1/CFHR5/IFI27	8	geneontology_Biological_Process	Up
GO:0006069	GO:0006069	ethanol oxidation	4/189	12/18866	4.53583e-06	5.54892e-05	4.03979e-05	ADH1B/ADH1C/ADH1A/ADH4	4	geneontology_Biological_Process	Up
GO:0009071	GO:0009071	serine family amino acid catabolic process	4/189	12/18866	4.53583e-06	5.54892e-05	4.03979e-05	AGXT/CDO1/DAO/SDS	4	geneontology_Biological_Process	Up
GO:0045861	GO:0045861	negative regulation of proteolysis	15/189	369/18866	4.91347e-06	5.97513e-05	4.35008e-05	SERPINC1/AMBP/ITIH3/HRG/SPP2/ITIH1/LPA/KNG1/SERPINA11/FETUB/SERPINF2/F2/SERPINA4/FABP1/AHSG	15	geneontology_Biological_Process	Up
GO:0006625	GO:0006625	protein targeting to peroxisome	7/189	68/18866	5.24367e-06	6.2648e-05	4.56097e-05	AGXT/HAO1/DAO/PIPOX/SLC27A2/BAAT/HAO2	7	geneontology_Biological_Process	Up
GO:0072662	GO:0072662	protein localization to peroxisome	7/189	68/18866	5.24367e-06	6.2648e-05	4.56097e-05	AGXT/HAO1/DAO/PIPOX/SLC27A2/BAAT/HAO2	7	geneontology_Biological_Process	Up
GO:0072663	GO:0072663	establishment of protein localization to peroxisome	7/189	68/18866	5.24367e-06	6.2648e-05	4.56097e-05	AGXT/HAO1/DAO/PIPOX/SLC27A2/BAAT/HAO2	7	geneontology_Biological_Process	Up
GO:0031960	GO:0031960	response to corticosteroid	10/189	164/18866	6.20065e-06	7.36508e-05	5.36201e-05	TAT/PCK1/PCK2/AGXT/PFKFB1/CDO1/APOA2/CPS1/IGFBP2/ARG1	10	geneontology_Biological_Process	Up
GO:0032374	GO:0032374	regulation of cholesterol transport	7/189	70/18866	6.3757e-06	7.52922e-05	5.48151e-05	APOC1/APOC3/PON1/APOA5/ABCB4/APOA1/APOA2	7	geneontology_Biological_Process	Up
GO:0019627	GO:0019627	urea metabolic process	4/189	13/18866	6.50047e-06	7.58883e-05	5.52491e-05	CYP2C9/OTC/CPS1/ARG1	4	geneontology_Biological_Process	Up
GO:0071941	GO:0071941	nitrogen cycle metabolic process	4/189	13/18866	6.50047e-06	7.58883e-05	5.52491e-05	CYP2C9/OTC/CPS1/ARG1	4	geneontology_Biological_Process	Up
GO:0032371	GO:0032371	regulation of sterol transport	7/189	71/18866	7.01367e-06	8.14144e-05	5.92722e-05	APOC1/APOC3/PON1/APOA5/ABCB4/APOA1/APOA2	7	geneontology_Biological_Process	Up
GO:0043574	GO:0043574	peroxisomal transport	7/189	72/18866	7.70378e-06	8.892e-05	6.47365e-05	AGXT/HAO1/DAO/PIPOX/SLC27A2/BAAT/HAO2	7	geneontology_Biological_Process	Up
GO:0060191	GO:0060191	regulation of lipase activity	8/189	101/18866	7.98414e-06	9.16382e-05	6.67155e-05	APOC1/ANG/APOC3/APOA5/APOA1/ANGPTL4/APOA2/APOH	8	geneontology_Biological_Process	Up
GO:0032368	GO:0032368	regulation of lipid transport	9/189	135/18866	8.87139e-06	0.000101253	7.37152e-05	APOC1/APOC3/CYP4A11/PON1/CYP4F2/APOA5/ABCB4/APOA1/APOA2	9	geneontology_Biological_Process	Up
GO:0010872	GO:0010872	regulation of cholesterol esterification	4/189	14/18866	9.02943e-06	0.000101918	7.41994e-05	APOC1/APOA5/APOA1/APOA2	4	geneontology_Biological_Process	Up
GO:0010896	GO:0010896	regulation of triglyceride catabolic process	4/189	14/18866	9.02943e-06	0.000101918	7.41994e-05	APOC3/APOA5/APOA1/GPLD1	4	geneontology_Biological_Process	Up
GO:0015721	GO:0015721	bile acid and bile salt transport	5/189	29/18866	9.34836e-06	0.000104938	7.63981e-05	SLC27A5/SLC10A1/SLC51A/AQP9/AKR1C4	5	geneontology_Biological_Process	Up
GO:0006637	GO:0006637	acyl-CoA metabolic process	8/189	104/18866	9.91938e-06	0.000110138	8.01835e-05	ACSM2A/ACSM2B/GLYAT/ACSM5/PIPOX/HMGCS2/BAAT/ACOT12	8	geneontology_Biological_Process	Up
GO:0035383	GO:0035383	thioester metabolic process	8/189	104/18866	9.91938e-06	0.000110138	8.01835e-05	ACSM2A/ACSM2B/GLYAT/ACSM5/PIPOX/HMGCS2/BAAT/ACOT12	8	geneontology_Biological_Process	Up
GO:0015909	GO:0015909	long-chain fatty acid transport	7/189	75/18866	1.01208e-05	0.000111766	8.13693e-05	SLC27A5/FABP4/SLC27A2/MFSD2A/FABP1/THRSP/PLA2G2A	7	geneontology_Biological_Process	Up
GO:0009066	GO:0009066	aspartate family amino acid metabolic process	6/189	50/18866	1.02858e-05	0.000112978	8.22515e-05	RIDA/GNMT/PIPOX/MAT1A/SDS/BHMT	6	geneontology_Biological_Process	Up
GO:0016051	GO:0016051	carbohydrate biosynthetic process	11/189	213/18866	1.03986e-05	0.000113607	8.27092e-05	RBP4/PCK1/PCK2/ALDOB/GYS2/PFKFB1/GNMT/RGN/FBP1/GPT/SDS	11	geneontology_Biological_Process	Up
GO:0033865	GO:0033865	nucleoside bisphosphate metabolic process	9/189	138/18866	1.06012e-05	0.000113878	8.29069e-05	ACSM2A/ACSM2B/GLYAT/ACSM5/PIPOX/HMGCS2/BAAT/SULT2A1/ACOT12	9	geneontology_Biological_Process	Up
GO:0033875	GO:0033875	ribonucleoside bisphosphate metabolic process	9/189	138/18866	1.06012e-05	0.000113878	8.29069e-05	ACSM2A/ACSM2B/GLYAT/ACSM5/PIPOX/HMGCS2/BAAT/SULT2A1/ACOT12	9	geneontology_Biological_Process	Up
GO:0034032	GO:0034032	purine nucleoside bisphosphate metabolic process	9/189	138/18866	1.06012e-05	0.000113878	8.29069e-05	ACSM2A/ACSM2B/GLYAT/ACSM5/PIPOX/HMGCS2/BAAT/SULT2A1/ACOT12	9	geneontology_Biological_Process	Up
GO:0030301	GO:0030301	cholesterol transport	8/189	105/18866	1.06465e-05	0.000113878	8.29069e-05	APOC1/APOC3/PON1/APOA5/ABCB4/LCAT/APOA1/APOA2	8	geneontology_Biological_Process	Up
GO:1901616	GO:1901616	organic hydroxy compound catabolic process	7/189	76/18866	1.1054e-05	0.000117621	8.56322e-05	LDHD/CYP4A11/CYP4F2/HAO1/SULT2A1/ADH4/CYP7A1	7	geneontology_Biological_Process	Up
GO:0000098	GO:0000098	sulfur amino acid catabolic process	4/189	15/18866	1.22165e-05	0.000129318	9.41475e-05	AGXT/CDO1/MAT1A/CTH	4	geneontology_Biological_Process	Up
GO:0045940	GO:0045940	positive regulation of steroid metabolic process	5/189	31/18866	1.31598e-05	0.000138585	0.000100894	APOC1/APOA5/APOA1/APOA2/CYP7A1	5	geneontology_Biological_Process	Up
GO:0008210	GO:0008210	estrogen metabolic process	5/189	32/18866	1.54706e-05	0.000162085	0.000118003	CYP2C9/CYP2C8/CYP2D6/CYP3A4/CYP1A2	5	geneontology_Biological_Process	Up
GO:0034380	GO:0034380	high-density lipoprotein particle assembly	4/189	16/18866	1.61613e-05	0.000168457	0.000122642	APOA5/LCAT/APOA1/APOA2	4	geneontology_Biological_Process	Up
GO:0007031	GO:0007031	peroxisome organization	7/189	83/18866	1.97916e-05	0.00020525	0.000149428	AGXT/HAO1/DAO/PIPOX/SLC27A2/BAAT/HAO2	7	geneontology_Biological_Process	Up
GO:0006957	GO:0006957	complement activation, alternative pathway	4/189	17/18866	2.09688e-05	0.000215272	0.000156725	C8A/C8B/CFHR5/C9	4	geneontology_Biological_Process	Up
GO:0034384	GO:0034384	high-density lipoprotein particle clearance	4/189	17/18866	2.09688e-05	0.000215272	0.000156725	APOC3/APOA1/APOA2/GPLD1	4	geneontology_Biological_Process	Up
GO:0010565	GO:0010565	regulation of cellular ketone metabolic process	10/189	189/18866	2.14481e-05	0.000219092	0.000159506	APOC1/APOC3/APOA5/RGN/INSIG1/APOA1/BHMT/MFSD2A/FABP1/CYP7A1	10	geneontology_Biological_Process	Up
GO:0031667	GO:0031667	response to nutrient levels	16/189	473/18866	2.34375e-05	0.000238223	0.000173434	SERPINC1/PCK1/PON1/PCK2/PFKFB1/GPT/APOA1/OTC/LRCOL1/GCGR/SLC38A3/CPS1/MFSD2A/ALB/IGFBP2/ARG1	16	geneontology_Biological_Process	Up
GO:0045922	GO:0045922	negative regulation of fatty acid metabolic process	5/189	35/18866	2.43396e-05	0.000246168	0.000179218	APOC1/APOC3/INSIG1/MFSD2A/CYP7A1	5	geneontology_Biological_Process	Up
GO:0015918	GO:0015918	sterol transport	8/189	118/18866	2.50082e-05	0.000251683	0.000183233	APOC1/APOC3/PON1/APOA5/ABCB4/LCAT/APOA1/APOA2	8	geneontology_Biological_Process	Up
GO:0046889	GO:0046889	positive regulation of lipid biosynthetic process	7/189	88/18866	2.90147e-05	0.000290573	0.000211547	APOA5/RGN/APOA1/MFSD2A/GPLD1/HSD17B13/CYP7A1	7	geneontology_Biological_Process	Up
GO:0090303	GO:0090303	positive regulation of wound healing	6/189	61/18866	3.28062e-05	0.000326942	0.000238024	F12/HRG/PLG/SERPINF2/F2/APOH	6	geneontology_Biological_Process	Up
GO:0015914	GO:0015914	phospholipid transport	7/189	91/18866	3.60712e-05	0.000357735	0.000260443	APOC1/APOC3/APOA5/ABCB4/APOA1/APOA2/MFSD2A	7	geneontology_Biological_Process	Up
GO:0006081	GO:0006081	cellular aldehyde metabolic process	6/189	63/18866	3.94845e-05	0.000389695	0.00028371	ALDOB/AGXT/AKR7A3/AGXT2/ALDH8A1/ADH4	6	geneontology_Biological_Process	Up
GO:0055090	GO:0055090	acylglycerol homeostasis	5/189	39/18866	4.17897e-05	0.000407395	0.000296596	ACSM2A/APOC3/APOA5/APOA1/ANGPTL4	5	geneontology_Biological_Process	Up
GO:0070328	GO:0070328	triglyceride homeostasis	5/189	39/18866	4.17897e-05	0.000407395	0.000296596	ACSM2A/APOC3/APOA5/APOA1/ANGPTL4	5	geneontology_Biological_Process	Up
GO:0046165	GO:0046165	alcohol biosynthetic process	9/189	164/18866	4.18761e-05	0.000407395	0.000296596	PCK1/PCK2/APOA5/SEC14L2/INSIG1/APOA1/HMGCS2/CYP3A4/CYP7A1	9	geneontology_Biological_Process	Up
GO:0033344	GO:0033344	cholesterol efflux	6/189	64/18866	4.32096e-05	0.000418375	0.00030459	APOC1/APOC3/PON1/APOA5/APOA1/APOA2	6	geneontology_Biological_Process	Up
GO:0031640	GO:0031640	killing of cells of other organism	6/189	65/18866	4.7211e-05	0.00045439	0.00033081	CFHR2/HRG/F2/ARG1/CFHR1/CFHR5	6	geneontology_Biological_Process	Up
GO:0050892	GO:0050892	intestinal absorption	5/189	40/18866	4.7374e-05	0.00045439	0.00033081	APOA5/MOGAT2/APOA1/APOA2/FABP1	5	geneontology_Biological_Process	Up
GO:0043691	GO:0043691	reverse cholesterol transport	4/189	21/18866	5.11014e-05	0.000485582	0.000353519	APOC3/LCAT/APOA1/APOA2	4	geneontology_Biological_Process	Up
GO:0045717	GO:0045717	negative regulation of fatty acid biosynthetic process	4/189	21/18866	5.11014e-05	0.000485582	0.000353519	APOC1/APOC3/INSIG1/CYP7A1	4	geneontology_Biological_Process	Up
GO:0043648	GO:0043648	dicarboxylic acid metabolic process	7/189	97/18866	5.44334e-05	0.00051485	0.000374827	TAT/HAAO/PCK1/FTCD/AMDHD1/UROC1/ALDH1L1	7	geneontology_Biological_Process	Up
GO:1905952	GO:1905952	regulation of lipid localization	9/189	171/18866	5.79906e-05	0.000544769	0.000396609	APOC1/APOC3/CYP4A11/PON1/CYP4F2/APOA5/ABCB4/APOA1/APOA2	9	geneontology_Biological_Process	Up
GO:0045833	GO:0045833	negative regulation of lipid metabolic process	7/189	98/18866	5.813e-05	0.000544769	0.000396609	APOC1/APOC3/INSIG1/APOA2/MFSD2A/GPLD1/CYP7A1	7	geneontology_Biological_Process	Up
GO:0001906	GO:0001906	cell killing	9/189	172/18866	6.06711e-05	0.000565987	0.000412056	AZGP1/CFHR2/HRG/DNASE1L3/F2/ARG1/CFHR1/CFHR5/C9	9	geneontology_Biological_Process	Up
GO:0015748	GO:0015748	organophosphate ester transport	8/189	135/18866	6.55364e-05	0.000608595	0.000443076	APOC1/APOC3/APOA5/ABCB4/APOA1/SLC25A47/APOA2/MFSD2A	8	geneontology_Biological_Process	Up
GO:0009068	GO:0009068	aspartate family amino acid catabolic process	4/189	23/18866	7.44304e-05	0.000684961	0.000498673	RIDA/PIPOX/MAT1A/SDS	4	geneontology_Biological_Process	Up
GO:0010866	GO:0010866	regulation of triglyceride biosynthetic process	4/189	23/18866	7.44304e-05	0.000684961	0.000498673	RGN/MFSD2A/GPLD1/THRSP	4	geneontology_Biological_Process	Up
GO:0098754	GO:0098754	detoxification	8/189	138/18866	7.65275e-05	0.000701102	0.000510424	HP/RGN/AKR7A3/ALB/ADH4/GSTA1/FABP1/MT1X	8	geneontology_Biological_Process	Up
GO:0009259	GO:0009259	ribonucleotide metabolic process	14/189	416/18866	8.114e-05	0.000740041	0.000538773	ACSM2A/ACSM2B/GLYAT/ALDOB/PFKFB1/FBP1/ACSM5/PIPOX/HMGCS2/BAAT/SULT2A1/OGDHL/ACOT12/UPP2	14	geneontology_Biological_Process	Up
GO:0072521	GO:0072521	purine-containing compound metabolic process	15/189	472/18866	8.5688e-05	0.000778047	0.000566442	ACSM2A/ACSM2B/GLYAT/ALDOB/TTR/PFKFB1/GNMT/FBP1/ACSM5/PIPOX/HMGCS2/BAAT/SULT2A1/OGDHL/ACOT12	15	geneontology_Biological_Process	Up
GO:0062014	GO:0062014	negative regulation of small molecule metabolic process	7/189	105/18866	9.01752e-05	0.000815168	0.000593468	APOC1/APOC3/PFKFB1/FBP1/INSIG1/MFSD2A/CYP7A1	7	geneontology_Biological_Process	Up
GO:1903036	GO:1903036	positive regulation of response to wounding	6/189	74/18866	9.82813e-05	0.000884532	0.000643967	F12/HRG/PLG/SERPINF2/F2/APOH	6	geneontology_Biological_Process	Up
GO:0042537	GO:0042537	benzene-containing compound metabolic process	4/189	25/18866	0.000104676	0.000937956	0.000682861	HAAO/PON3/ALDH8A1/CYP2E1	4	geneontology_Biological_Process	Up
GO:0006695	GO:0006695	cholesterol biosynthetic process	6/189	75/18866	0.000105948	0.00094109	0.000685143	APOA5/SEC14L2/INSIG1/APOA1/HMGCS2/CYP7A1	6	geneontology_Biological_Process	Up
GO:1902653	GO:1902653	secondary alcohol biosynthetic process	6/189	75/18866	0.000105948	0.00094109	0.000685143	APOA5/SEC14L2/INSIG1/APOA1/HMGCS2/CYP7A1	6	geneontology_Biological_Process	Up
GO:0019693	GO:0019693	ribose phosphate metabolic process	14/189	427/18866	0.00010687	0.000945173	0.000688115	ACSM2A/ACSM2B/GLYAT/ALDOB/PFKFB1/FBP1/ACSM5/PIPOX/HMGCS2/BAAT/SULT2A1/OGDHL/ACOT12/UPP2	14	geneontology_Biological_Process	Up
GO:0006547	GO:0006547	histidine metabolic process	3/189	10/18866	0.000112755	0.000980251	0.000713654	FTCD/AMDHD1/UROC1	3	geneontology_Biological_Process	Up
GO:0035376	GO:0035376	sterol import	3/189	10/18866	0.000112755	0.000980251	0.000713654	APOC3/APOA1/APOA2	3	geneontology_Biological_Process	Up
GO:0070508	GO:0070508	cholesterol import	3/189	10/18866	0.000112755	0.000980251	0.000713654	APOC3/APOA1/APOA2	3	geneontology_Biological_Process	Up
GO:0070942	GO:0070942	neutrophil mediated cytotoxicity	3/189	10/18866	0.000112755	0.000980251	0.000713654	DNASE1L3/F2/ARG1	3	geneontology_Biological_Process	Up
GO:0006898	GO:0006898	receptor-mediated endocytosis	12/189	328/18866	0.000121716	0.00105364	0.000767081	APOC1/HPR/HP/HPX/APOC3/CD14/APOA5/AMBP/TFR2/APOA1/ALB/SAA1	12	geneontology_Biological_Process	Up
GO:0034114	GO:0034114	regulation of heterotypic cell-cell adhesion	4/189	26/18866	0.000122744	0.00105364	0.000767081	APOA1/FGA/FGG/FGB	4	geneontology_Biological_Process	Up
GO:0071377	GO:0071377	cellular response to glucagon stimulus	4/189	26/18866	0.000122744	0.00105364	0.000767081	PCK1/GCGR/CPS1/ARG1	4	geneontology_Biological_Process	Up
GO:0032102	GO:0032102	negative regulation of response to external stimulus	14/189	433/18866	0.00012369	0.00105732	0.000769762	F12/KLKB1/HRG/KNG1/APOA1/PLG/SERPINF2/F2/FGA/FGG/SAA1/FGB/APOH/ARG1	14	geneontology_Biological_Process	Up
GO:0052548	GO:0052548	regulation of endopeptidase activity	14/189	434/18866	0.000126706	0.00107859	0.000785246	SERPINC1/AMBP/ITIH3/HRG/SPP2/ITIH1/LPA/KNG1/SERPINA11/FETUB/SERPINF2/SERPINA4/FABP1/AHSG	14	geneontology_Biological_Process	Up
GO:0050996	GO:0050996	positive regulation of lipid catabolic process	4/189	27/18866	0.000142967	0.00120695	0.000878698	APOA5/APOA1/APOA2/FABP1	4	geneontology_Biological_Process	Up
GO:1903319	GO:1903319	positive regulation of protein maturation	4/189	27/18866	0.000142967	0.00120695	0.000878698	CLEC3B/F12/KLKB1/TFR2	4	geneontology_Biological_Process	Up
GO:0002793	GO:0002793	positive regulation of peptide secretion	9/189	193/18866	0.000146376	0.00123065	0.000895948	ANG/RBP4/CD14/TFR2/FGA/FGG/GPLD1/SAA1/FGB	9	geneontology_Biological_Process	Up
GO:0006090	GO:0006090	pyruvate metabolic process	8/189	152/18866	0.000150094	0.00124272	0.000904741	PCK1/PCK2/ALDOB/AGXT/PFKFB1/FBP1/SDS/OGDHL	8	geneontology_Biological_Process	Up
GO:0000050	GO:0000050	urea cycle	3/189	11/18866	0.000153896	0.00124272	0.000904741	OTC/CPS1/ARG1	3	geneontology_Biological_Process	Up
GO:0006558	GO:0006558	L-phenylalanine metabolic process	3/189	11/18866	0.000153896	0.00124272	0.000904741	TAT/HPD/HGD	3	geneontology_Biological_Process	Up
GO:0006559	GO:0006559	L-phenylalanine catabolic process	3/189	11/18866	0.000153896	0.00124272	0.000904741	TAT/HPD/HGD	3	geneontology_Biological_Process	Up
GO:0006570	GO:0006570	tyrosine metabolic process	3/189	11/18866	0.000153896	0.00124272	0.000904741	TAT/HPD/HGD	3	geneontology_Biological_Process	Up
GO:0034378	GO:0034378	chylomicron assembly	3/189	11/18866	0.000153896	0.00124272	0.000904741	APOC3/APOA1/APOA2	3	geneontology_Biological_Process	Up
GO:0051006	GO:0051006	positive regulation of lipoprotein lipase activity	3/189	11/18866	0.000153896	0.00124272	0.000904741	APOA5/APOA1/APOH	3	geneontology_Biological_Process	Up
GO:1902221	GO:1902221	erythrose 4-phosphate/phosphoenolpyruvate family amino acid metabolic process	3/189	11/18866	0.000153896	0.00124272	0.000904741	TAT/HPD/HGD	3	geneontology_Biological_Process	Up
GO:1902222	GO:1902222	erythrose 4-phosphate/phosphoenolpyruvate family amino acid catabolic process	3/189	11/18866	0.000153896	0.00124272	0.000904741	TAT/HPD/HGD	3	geneontology_Biological_Process	Up
GO:1904478	GO:1904478	regulation of intestinal absorption	3/189	11/18866	0.000153896	0.00124272	0.000904741	APOA5/APOA1/APOA2	3	geneontology_Biological_Process	Up
GO:0016126	GO:0016126	sterol biosynthetic process	6/189	81/18866	0.000162496	0.001307	0.000951541	APOA5/SEC14L2/INSIG1/APOA1/HMGCS2/CYP7A1	6	geneontology_Biological_Process	Up
GO:0062013	GO:0062013	positive regulation of small molecule metabolic process	8/189	154/18866	0.000164245	0.00131589	0.000958009	PFKFB1/APOA5/RGN/GPT/APOA1/GPLD1/FABP1/CYP7A1	8	geneontology_Biological_Process	Up
GO:0002455	GO:0002455	humoral immune response mediated by circulating immunoglobulin	8/189	155/18866	0.000171722	0.00136829	0.000996158	HPX/C6/MASP2/C8A/C8B/C4BPB/C4BPA/C9	8	geneontology_Biological_Process	Up
GO:0043434	GO:0043434	response to peptide hormone	14/189	447/18866	0.000172125	0.00136829	0.000996158	PCK1/PCK2/PFKFB1/CDO1/GPT/INSIG1/OTC/GCGR/CYP11A1/CPS1/GPLD1/ARG1/IGFBP1/AHSG	14	geneontology_Biological_Process	Up
GO:0008209	GO:0008209	androgen metabolic process	4/189	29/18866	0.000190479	0.00150832	0.00109811	HSD17B6/AKR1C4/CYP3A4/UGT2B7	4	geneontology_Biological_Process	Up
GO:0044262	GO:0044262	cellular carbohydrate metabolic process	11/189	294/18866	0.000192496	0.00151841	0.00110545	PCK1/PCK2/GYS2/PFKFB1/GNMT/RGN/FBP1/GPT/MOGAT2/GCGR/GPLD1	11	geneontology_Biological_Process	Up
GO:0010043	GO:0010043	response to zinc ion	5/189	54/18866	0.000203291	0.00157028	0.00114321	HAAO/OTC/CPS1/MT1X/ARG1	5	geneontology_Biological_Process	Up
GO:0002923	GO:0002923	regulation of humoral immune response mediated by circulating immunoglobulin	3/189	12/18866	0.000203682	0.00157028	0.00114321	HPX/C4BPB/C4BPA	3	geneontology_Biological_Process	Up
GO:0006534	GO:0006534	cysteine metabolic process	3/189	12/18866	0.000203682	0.00157028	0.00114321	AGXT/CDO1/CTH	3	geneontology_Biological_Process	Up
GO:0010755	GO:0010755	regulation of plasminogen activation	3/189	12/18866	0.000203682	0.00157028	0.00114321	CLEC3B/F12/SERPINF2	3	geneontology_Biological_Process	Up
GO:0046185	GO:0046185	aldehyde catabolic process	3/189	12/18866	0.000203682	0.00157028	0.00114321	AGXT/AGXT2/ADH4	3	geneontology_Biological_Process	Up
GO:0061365	GO:0061365	positive regulation of triglyceride lipase activity	3/189	12/18866	0.000203682	0.00157028	0.00114321	APOA5/APOA1/APOH	3	geneontology_Biological_Process	Up
GO:0009150	GO:0009150	purine ribonucleotide metabolic process	13/189	401/18866	0.000210742	0.0016186	0.00117839	ACSM2A/ACSM2B/GLYAT/ALDOB/PFKFB1/FBP1/ACSM5/PIPOX/HMGCS2/BAAT/SULT2A1/OGDHL/ACOT12	13	geneontology_Biological_Process	Up
GO:0010906	GO:0010906	regulation of glucose metabolic process	7/189	121/18866	0.000218731	0.00167366	0.00121848	PFKFB1/GNMT/RGN/FBP1/GPT/GCGR/GPLD1	7	geneontology_Biological_Process	Up
GO:0042594	GO:0042594	response to starvation	9/189	206/18866	0.000238399	0.00181734	0.00132309	PCK1/PCK2/PFKFB1/GPT/GCGR/SLC38A3/CPS1/MFSD2A/ALB	9	geneontology_Biological_Process	Up
GO:0034379	GO:0034379	very-low-density lipoprotein particle assembly	3/189	13/18866	0.000262837	0.00199419	0.00145184	APOC1/APOC3/MFSD2A	3	geneontology_Biological_Process	Up
GO:0052547	GO:0052547	regulation of peptidase activity	14/189	466/18866	0.00026355	0.00199419	0.00145184	SERPINC1/AMBP/ITIH3/HRG/SPP2/ITIH1/LPA/KNG1/SERPINA11/FETUB/SERPINF2/SERPINA4/FABP1/AHSG	14	geneontology_Biological_Process	Up
GO:1903793	GO:1903793	positive regulation of anion transport	5/189	58/18866	0.000285178	0.00214989	0.00156518	CYP4A11/CYP4F2/ABCB4/APOA1/SLC38A3	5	geneontology_Biological_Process	Up
GO:0043687	GO:0043687	post-translational protein modification	12/189	363/18866	0.000309574	0.00232522	0.00169283	SERPINC1/APOA5/SPP2/KNG1/APOA1/FGA/APOA2/FGG/GPLD1/ALB/IGFBP1/AHSG	12	geneontology_Biological_Process	Up
GO:0006536	GO:0006536	glutamate metabolic process	4/189	33/18866	0.00031807	0.00238028	0.00173292	TAT/FTCD/AMDHD1/UROC1	4	geneontology_Biological_Process	Up
GO:0050667	GO:0050667	homocysteine metabolic process	3/189	14/18866	0.000332057	0.00246688	0.00179597	BHMT/CPS1/CTH	3	geneontology_Biological_Process	Up
GO:0052803	GO:0052803	imidazole-containing compound metabolic process	3/189	14/18866	0.000332057	0.00246688	0.00179597	FTCD/AMDHD1/UROC1	3	geneontology_Biological_Process	Up
GO:0050714	GO:0050714	positive regulation of protein secretion	8/189	172/18866	0.000348234	0.00257769	0.00187664	ANG/RBP4/CD14/FGA/FGG/GPLD1/SAA1/FGB	8	geneontology_Biological_Process	Up
GO:0019218	GO:0019218	regulation of steroid metabolic process	7/189	131/18866	0.000355543	0.00262229	0.00190911	APOC1/APOA5/SEC14L2/INSIG1/APOA1/APOA2/CYP7A1	7	geneontology_Biological_Process	Up
GO:2000352	GO:2000352	negative regulation of endothelial cell apoptotic process	4/189	34/18866	0.000357675	0.00262852	0.00191365	FGA/ANGPTL4/FGG/FGB	4	geneontology_Biological_Process	Up
GO:0051591	GO:0051591	response to cAMP	6/189	94/18866	0.000366188	0.00268144	0.00195217	PCK1/AGXT/PFKFB1/CDO1/AQP9/CPS1	6	geneontology_Biological_Process	Up
GO:0006000	GO:0006000	fructose metabolic process	3/189	15/18866	0.000412017	0.00298493	0.00217313	ALDOB/PFKFB1/FBP1	3	geneontology_Biological_Process	Up
GO:0010867	GO:0010867	positive regulation of triglyceride biosynthetic process	3/189	15/18866	0.000412017	0.00298493	0.00217313	RGN/MFSD2A/GPLD1	3	geneontology_Biological_Process	Up
GO:0070365	GO:0070365	hepatocyte differentiation	3/189	15/18866	0.000412017	0.00298493	0.00217313	PCK1/PCK2/CPS1	3	geneontology_Biological_Process	Up
GO:0042157	GO:0042157	lipoprotein metabolic process	7/189	135/18866	0.000426504	0.00307896	0.00224158	APOC1/APOC3/APOA5/LCAT/APOA1/APOA2/GPLD1	7	geneontology_Biological_Process	Up
GO:0019730	GO:0019730	antimicrobial humoral response	7/189	137/18866	0.000465996	0.00335222	0.00244052	ANG/HRG/F2/FGA/PGLYRP2/FGB/PLA2G2A	7	geneontology_Biological_Process	Up
GO:0090277	GO:0090277	positive regulation of peptide hormone secretion	6/189	99/18866	0.0004836	0.00346665	0.00252383	RBP4/TFR2/FGA/FGG/GPLD1/FGB	6	geneontology_Biological_Process	Up
GO:0006555	GO:0006555	methionine metabolic process	3/189	16/18866	0.000503368	0.00357077	0.00259963	GNMT/MAT1A/BHMT	3	geneontology_Biological_Process	Up
GO:0034116	GO:0034116	positive regulation of heterotypic cell-cell adhesion	3/189	16/18866	0.000503368	0.00357077	0.00259963	FGA/FGG/FGB	3	geneontology_Biological_Process	Up
GO:0034374	GO:0034374	low-density lipoprotein particle remodeling	3/189	16/18866	0.000503368	0.00357077	0.00259963	LPA/APOA2/PLA2G2A	3	geneontology_Biological_Process	Up
GO:0071375	GO:0071375	cellular response to peptide hormone stimulus	11/189	330/18866	0.000513482	0.00362991	0.00264269	PCK1/PCK2/GPT/INSIG1/GCGR/CYP11A1/CPS1/GPLD1/ARG1/IGFBP1/AHSG	11	geneontology_Biological_Process	Up
GO:0006163	GO:0006163	purine nucleotide metabolic process	13/189	442/18866	0.000533211	0.00375638	0.00273477	ACSM2A/ACSM2B/GLYAT/ALDOB/PFKFB1/FBP1/ACSM5/PIPOX/HMGCS2/BAAT/SULT2A1/OGDHL/ACOT12	13	geneontology_Biological_Process	Up
GO:0045923	GO:0045923	positive regulation of fatty acid metabolic process	4/189	38/18866	0.000551801	0.00383477	0.00279183	APOA5/RGN/APOA1/FABP1	4	geneontology_Biological_Process	Up
GO:1900026	GO:1900026	positive regulation of substrate adhesion-dependent cell spreading	4/189	38/18866	0.000551801	0.00383477	0.00279183	APOA1/FGA/FGG/FGB	4	geneontology_Biological_Process	Up
GO:0001889	GO:0001889	liver development	7/189	141/18866	0.000553723	0.00383477	0.00279183	PCK1/PCK2/RGN/OTC/BAAT/CPS1/ARG1	7	geneontology_Biological_Process	Up
GO:0006958	GO:0006958	complement activation, classical pathway	7/189	141/18866	0.000553723	0.00383477	0.00279183	C6/MASP2/C8A/C8B/C4BPB/C4BPA/C9	7	geneontology_Biological_Process	Up
GO:0007586	GO:0007586	digestion	7/189	141/18866	0.000553723	0.00383477	0.00279183	RBP4/APOA5/MOGAT2/APOA1/LRCOL1/APOA2/FABP1	7	geneontology_Biological_Process	Up
GO:0022600	GO:0022600	digestive system process	6/189	102/18866	0.000566958	0.00391316	0.00284891	RBP4/APOA5/MOGAT2/APOA1/APOA2/FABP1	6	geneontology_Biological_Process	Up
GO:1901570	GO:1901570	fatty acid derivative biosynthetic process	6/189	103/18866	0.00059709	0.00410302	0.00298713	SLC27A5/CYP4A22/CYP4A11/CYP2C9/HMGCS2/CYP2C8	6	geneontology_Biological_Process	Up
GO:0034381	GO:0034381	plasma lipoprotein particle clearance	5/189	68/18866	0.000598482	0.00410302	0.00298713	APOC1/APOC3/APOA1/APOA2/GPLD1	5	geneontology_Biological_Process	Up
GO:0000097	GO:0000097	sulfur amino acid biosynthetic process	3/189	17/18866	0.00060674	0.0041319	0.00300815	CDO1/BHMT/CTH	3	geneontology_Biological_Process	Up
GO:0030299	GO:0030299	intestinal cholesterol absorption	3/189	17/18866	0.00060674	0.0041319	0.00300815	APOA5/APOA1/APOA2	3	geneontology_Biological_Process	Up
GO:0006656	GO:0006656	phosphatidylcholine biosynthetic process	4/189	39/18866	0.000610088	0.0041409	0.0030147	LCAT/APOA1/APOA2/MFSD2A	4	geneontology_Biological_Process	Up
GO:0061008	GO:0061008	hepaticobiliary system development	7/189	144/18866	0.000627761	0.00424674	0.00309176	PCK1/PCK2/RGN/OTC/BAAT/CPS1/ARG1	7	geneontology_Biological_Process	Up
GO:1903317	GO:1903317	regulation of protein maturation	5/189	69/18866	0.00064006	0.00431565	0.00314193	CLEC3B/F12/KLKB1/TFR2/SERPINF2	5	geneontology_Biological_Process	Up
GO:0051047	GO:0051047	positive regulation of secretion	11/189	340/18866	0.000657521	0.0044188	0.00321703	ANG/RBP4/CYP4A11/CD14/CYP4F2/TFR2/FGA/FGG/GPLD1/SAA1/FGB	11	geneontology_Biological_Process	Up
GO:0044070	GO:0044070	regulation of anion transport	6/189	105/18866	0.000661073	0.0044281	0.0032238	CYP4A11/CYP4F2/ABCB4/APOA1/SLC38A3/ARG1	6	geneontology_Biological_Process	Up
GO:0006730	GO:0006730	one-carbon metabolic process	4/189	40/18866	0.000672612	0.00448327	0.00326396	FTCD/GNMT/MAT1A/ALDH1L1	4	geneontology_Biological_Process	Up
GO:0003018	GO:0003018	vascular process in circulatory system	8/189	190/18866	0.000673697	0.00448327	0.00326396	SLC22A1/KNG1/SERPINF2/FGA/FGG/CPS1/MFSD2A/FGB	8	geneontology_Biological_Process	Up
GO:0032370	GO:0032370	positive regulation of lipid transport	5/189	70/18866	0.000683765	0.00453549	0.00330198	CYP4A11/PON1/CYP4F2/ABCB4/APOA1	5	geneontology_Biological_Process	Up
GO:0019395	GO:0019395	fatty acid oxidation	6/189	106/18866	0.000694993	0.00459505	0.00334534	HAO1/SLC27A2/HAO2/MFSD2A/ADH4/FABP1	6	geneontology_Biological_Process	Up
GO:0009070	GO:0009070	serine family amino acid biosynthetic process	3/189	18/18866	0.000722738	0.00476308	0.00346767	AGXT/AGXT2/CTH	3	geneontology_Biological_Process	Up
GO:0010675	GO:0010675	regulation of cellular carbohydrate metabolic process	7/189	148/18866	0.000738477	0.00484257	0.00352555	PFKFB1/GNMT/RGN/FBP1/GPT/GCGR/GPLD1	7	geneontology_Biological_Process	Up
GO:0071548	GO:0071548	response to dexamethasone	4/189	41/18866	0.000739541	0.00484257	0.00352555	PCK1/PCK2/CPS1/ARG1	4	geneontology_Biological_Process	Up
GO:0070988	GO:0070988	demethylation	5/189	72/18866	0.000777828	0.005077	0.00369622	CYP2C9/CYP2C8/CYP2D6/CYP3A4/CYP1A2	5	geneontology_Biological_Process	Up
GO:0046653	GO:0046653	tetrahydrofolate metabolic process	3/189	19/18866	0.000851948	0.00552549	0.00402273	FTCD/PIPOX/ALDH1L1	3	geneontology_Biological_Process	Up
GO:0098856	GO:0098856	intestinal lipid absorption	3/189	19/18866	0.000851948	0.00552549	0.00402273	APOA5/APOA1/APOA2	3	geneontology_Biological_Process	Up
GO:0034440	GO:0034440	lipid oxidation	6/189	111/18866	0.000885283	0.00572353	0.00416691	HAO1/SLC27A2/HAO2/MFSD2A/ADH4/FABP1	6	geneontology_Biological_Process	Up
GO:0031100	GO:0031100	animal organ regeneration	5/189	75/18866	0.000936604	0.00603622	0.00439456	PFKFB1/RGN/APOA1/BAAT/APOA2	5	geneontology_Biological_Process	Up
GO:0031099	GO:0031099	regeneration	8/189	201/18866	0.000971099	0.00623885	0.00454208	PFKFB1/APOA5/RGN/APOA1/PLG/BAAT/APOA2/IGFBP1	8	geneontology_Biological_Process	Up
GO:1990748	GO:1990748	cellular detoxification	6/189	114/18866	0.00101732	0.00651531	0.00474335	HP/RGN/ALB/ADH4/GSTA1/FABP1	6	geneontology_Biological_Process	Up
GO:0050777	GO:0050777	negative regulation of immune response	7/189	159/18866	0.00112406	0.00717644	0.00522468	AMBP/C4BPB/APOA1/C4BPA/APOA2/PGLYRP2/ARG1	7	geneontology_Biological_Process	Up
GO:0043651	GO:0043651	linoleic acid metabolic process	3/189	21/18866	0.00115224	0.00731064	0.00532237	CYP4A22/CYP4A11/GSTA1	3	geneontology_Biological_Process	Up
GO:0044241	GO:0044241	lipid digestion	3/189	21/18866	0.00115224	0.00731064	0.00532237	APOA5/APOA1/APOA2	3	geneontology_Biological_Process	Up
GO:0032369	GO:0032369	negative regulation of lipid transport	4/189	47/18866	0.0012431	0.00786272	0.00572431	APOC1/APOC3/CYP4F2/APOA2	4	geneontology_Biological_Process	Up
GO:0002460	GO:0002460	adaptive immune response based on somatic recombination of immune receptors built from immunoglobulin superfamily domains	11/189	370/18866	0.00130487	0.00822795	0.00599021	HPX/C6/AZGP1/MASP2/C8A/C8B/IL27/C4BPB/C4BPA/ARG1/C9	11	geneontology_Biological_Process	Up
GO:0006071	GO:0006071	glycerol metabolic process	3/189	22/18866	0.00132439	0.00829976	0.00604249	PCK1/PCK2/MOGAT2	3	geneontology_Biological_Process	Up
GO:0071467	GO:0071467	cellular response to pH	3/189	22/18866	0.00132439	0.00829976	0.00604249	PCK1/SLC38A3/GPLD1	3	geneontology_Biological_Process	Up
GO:1904036	GO:1904036	negative regulation of epithelial cell apoptotic process	4/189	48/18866	0.00134561	0.00840696	0.00612053	FGA/ANGPTL4/FGG/FGB	4	geneontology_Biological_Process	Up
GO:0097237	GO:0097237	cellular response to toxic substance	6/189	122/18866	0.00144383	0.0089931	0.00654726	HP/RGN/ALB/ADH4/GSTA1/FABP1	6	geneontology_Biological_Process	Up
GO:0006063	GO:0006063	uronic acid metabolic process	3/189	23/18866	0.00151188	0.00930353	0.00677326	DCXR/UGT2B7/UGT2B15	3	geneontology_Biological_Process	Up
GO:0019585	GO:0019585	glucuronate metabolic process	3/189	23/18866	0.00151188	0.00930353	0.00677326	DCXR/UGT2B7/UGT2B15	3	geneontology_Biological_Process	Up
GO:0045723	GO:0045723	positive regulation of fatty acid biosynthetic process	3/189	23/18866	0.00151188	0.00930353	0.00677326	APOA5/RGN/APOA1	3	geneontology_Biological_Process	Up
GO:0046135	GO:0046135	pyrimidine nucleoside catabolic process	3/189	23/18866	0.00151188	0.00930353	0.00677326	UPB1/DPYS/UPP2	3	geneontology_Biological_Process	Up
GO:0002698	GO:0002698	negative regulation of immune effector process	6/189	124/18866	0.00156908	0.00962651	0.00700841	C4BPB/APOA1/C4BPA/APOA2/PGLYRP2/ARG1	6	geneontology_Biological_Process	Up
GO:0009895	GO:0009895	negative regulation of catabolic process	10/189	323/18866	0.00159696	0.00976824	0.00711159	APOC1/HP/APOC3/PFKFB1/RGN/FBP1/F13B/APOA2/MFSD2A/GPLD1	10	geneontology_Biological_Process	Up
GO:0002719	GO:0002719	negative regulation of cytokine production involved in immune response	3/189	24/18866	0.0017152	0.0104602	0.00761534	APOA1/APOA2/ARG1	3	geneontology_Biological_Process	Up
GO:0003071	GO:0003071	renal system process involved in regulation of systemic arterial blood pressure	3/189	25/18866	0.00193482	0.0116603	0.00848906	CYP4A11/CYP4F2/SERPINF2	3	geneontology_Biological_Process	Up
GO:0010954	GO:0010954	positive regulation of protein processing	3/189	25/18866	0.00193482	0.0116603	0.00848906	CLEC3B/F12/KLKB1	3	geneontology_Biological_Process	Up
GO:0019400	GO:0019400	alditol metabolic process	3/189	25/18866	0.00193482	0.0116603	0.00848906	PCK1/PCK2/MOGAT2	3	geneontology_Biological_Process	Up
GO:0046339	GO:0046339	diacylglycerol metabolic process	3/189	25/18866	0.00193482	0.0116603	0.00848906	ANG/MOGAT2/APOA2	3	geneontology_Biological_Process	Up
GO:1900024	GO:1900024	regulation of substrate adhesion-dependent cell spreading	4/189	53/18866	0.00194787	0.0117044	0.00852117	APOA1/FGA/FGG/FGB	4	geneontology_Biological_Process	Up
GO:0046887	GO:0046887	positive regulation of hormone secretion	6/189	131/18866	0.00207349	0.0124227	0.0090441	RBP4/TFR2/FGA/FGG/GPLD1/FGB	6	geneontology_Biological_Process	Up
GO:0016064	GO:0016064	immunoglobulin mediated immune response	8/189	227/18866	0.00209816	0.0125337	0.00912496	HPX/C6/MASP2/C8A/C8B/C4BPB/C4BPA/C9	8	geneontology_Biological_Process	Up
GO:0008211	GO:0008211	glucocorticoid metabolic process	3/189	26/18866	0.00217118	0.0128945	0.00938763	APOA1/CYP11A1/HSD11B1	3	geneontology_Biological_Process	Up
GO:0036315	GO:0036315	cellular response to sterol	3/189	26/18866	0.00217118	0.0128945	0.00938763	INSIG1/GPLD1/CYP7A1	3	geneontology_Biological_Process	Up
GO:0046164	GO:0046164	alcohol catabolic process	4/189	55/18866	0.00223376	0.0132277	0.0096302	HAO1/SULT2A1/ADH4/CYP7A1	4	geneontology_Biological_Process	Up
GO:0032868	GO:0032868	response to insulin	9/189	283/18866	0.00226514	0.0133748	0.00973726	PCK1/PCK2/PFKFB1/GPT/INSIG1/OTC/GPLD1/IGFBP1/AHSG	9	geneontology_Biological_Process	Up
GO:0019724	GO:0019724	B cell mediated immunity	8/189	230/18866	0.00227618	0.0134012	0.00975652	HPX/C6/MASP2/C8A/C8B/C4BPB/C4BPA/C9	8	geneontology_Biological_Process	Up
GO:1901653	GO:1901653	cellular response to peptide	11/189	398/18866	0.00231323	0.0135803	0.00988685	PCK1/PCK2/GPT/INSIG1/GCGR/CYP11A1/CPS1/GPLD1/ARG1/IGFBP1/AHSG	11	geneontology_Biological_Process	Up
GO:0046683	GO:0046683	response to organophosphorus	6/189	134/18866	0.00232365	0.0136024	0.00990295	PCK1/AGXT/PFKFB1/CDO1/AQP9/CPS1	6	geneontology_Biological_Process	Up
GO:0044273	GO:0044273	sulfur compound catabolic process	4/189	56/18866	0.002387	0.0139333	0.0101438	AGXT/CDO1/MAT1A/CTH	4	geneontology_Biological_Process	Up
GO:0006650	GO:0006650	glycerophospholipid metabolic process	10/189	343/18866	0.00247509	0.0144063	0.0104882	APOC1/PON1/APOA5/ETNPPL/LCAT/APOA1/APOA2/MFSD2A/GPLD1/PLA2G2A	10	geneontology_Biological_Process	Up
GO:1905954	GO:1905954	positive regulation of lipid localization	5/189	94/18866	0.00255728	0.0148424	0.0108057	CYP4A11/PON1/CYP4F2/ABCB4/APOA1	5	geneontology_Biological_Process	Up
GO:0048545	GO:0048545	response to steroid hormone	10/189	346/18866	0.00263506	0.0152505	0.0111029	TAT/PCK1/PCK2/AGXT/PFKFB1/CDO1/APOA2/CPS1/IGFBP2/ARG1	10	geneontology_Biological_Process	Up
GO:0006760	GO:0006760	folic acid-containing compound metabolic process	3/189	28/18866	0.00269581	0.015558	0.0113267	FTCD/PIPOX/ALDH1L1	3	geneontology_Biological_Process	Up
GO:0051055	GO:0051055	negative regulation of lipid biosynthetic process	4/189	58/18866	0.00271489	0.015624	0.0113748	APOC1/APOC3/INSIG1/CYP7A1	4	geneontology_Biological_Process	Up
GO:0046456	GO:0046456	icosanoid biosynthetic process	4/189	59/18866	0.00288986	0.0165378	0.01204	CYP4A22/CYP4A11/CYP2C9/CYP2C8	4	geneontology_Biological_Process	Up
GO:0051289	GO:0051289	protein homotetramerization	4/189	59/18866	0.00288986	0.0165378	0.01204	GNMT/MAT1A/UPB1/CTH	4	geneontology_Biological_Process	Up
GO:0050764	GO:0050764	regulation of phagocytosis	5/189	97/18866	0.00293116	0.0167272	0.012178	C4BPB/APOA1/C4BPA/APOA2/AHSG	5	geneontology_Biological_Process	Up
GO:0032373	GO:0032373	positive regulation of sterol transport	3/189	29/18866	0.00298489	0.0169392	0.0123323	PON1/ABCB4/APOA1	3	geneontology_Biological_Process	Up
GO:0032376	GO:0032376	positive regulation of cholesterol transport	3/189	29/18866	0.00298489	0.0169392	0.0123323	PON1/ABCB4/APOA1	3	geneontology_Biological_Process	Up
GO:0006575	GO:0006575	cellular modified amino acid metabolic process	7/189	190/18866	0.00308889	0.0174809	0.0127267	FTCD/GNMT/PIPOX/BHMT/GSTA1/ALDH1L1/PLA2G2A	7	geneontology_Biological_Process	Up
GO:0035296	GO:0035296	regulation of tube diameter	6/189	143/18866	0.0032115	0.0180747	0.0131589	KNG1/SERPINF2/FGA/FGG/CPS1/FGB	6	geneontology_Biological_Process	Up
GO:0097746	GO:0097746	regulation of blood vessel diameter	6/189	143/18866	0.0032115	0.0180747	0.0131589	KNG1/SERPINF2/FGA/FGG/CPS1/FGB	6	geneontology_Biological_Process	Up
GO:0032372	GO:0032372	negative regulation of sterol transport	3/189	30/18866	0.00329231	0.0184279	0.0134161	APOC1/APOC3/APOA2	3	geneontology_Biological_Process	Up
GO:0032375	GO:0032375	negative regulation of cholesterol transport	3/189	30/18866	0.00329231	0.0184279	0.0134161	APOC1/APOC3/APOA2	3	geneontology_Biological_Process	Up
GO:0035150	GO:0035150	regulation of tube size	6/189	144/18866	0.00332384	0.0185536	0.0135076	KNG1/SERPINF2/FGA/FGG/CPS1/FGB	6	geneontology_Biological_Process	Up
GO:0010676	GO:0010676	positive regulation of cellular carbohydrate metabolic process	4/189	62/18866	0.00346075	0.0191607	0.0139496	PFKFB1/RGN/GPT/GPLD1	4	geneontology_Biological_Process	Up
GO:0034113	GO:0034113	heterotypic cell-cell adhesion	4/189	62/18866	0.00346075	0.0191607	0.0139496	APOA1/FGA/FGG/FGB	4	geneontology_Biological_Process	Up
GO:2000351	GO:2000351	regulation of endothelial cell apoptotic process	4/189	62/18866	0.00346075	0.0191607	0.0139496	FGA/ANGPTL4/FGG/FGB	4	geneontology_Biological_Process	Up
GO:0071549	GO:0071549	cellular response to dexamethasone stimulus	3/189	31/18866	0.00361844	0.0199797	0.0145458	PCK1/PCK2/ARG1	3	geneontology_Biological_Process	Up
GO:0098869	GO:0098869	cellular oxidant detoxification	5/189	103/18866	0.00379498	0.020898	0.0152144	HP/RGN/ALB/GSTA1/FABP1	5	geneontology_Biological_Process	Up
GO:0046686	GO:0046686	response to cadmium ion	4/189	64/18866	0.00388121	0.0213154	0.0155183	HAAO/MT1X/ARG1/CYP1A2	4	geneontology_Biological_Process	Up
GO:0002449	GO:0002449	lymphocyte mediated immunity	10/189	366/18866	0.00392544	0.0214678	0.0156293	HPX/C6/AZGP1/MASP2/C8A/C8B/C4BPB/C4BPA/ARG1/C9	10	geneontology_Biological_Process	Up
GO:0014074	GO:0014074	response to purine-containing compound	6/189	149/18866	0.00392999	0.0214678	0.0156293	PCK1/AGXT/PFKFB1/CDO1/AQP9/CPS1	6	geneontology_Biological_Process	Up
GO:0009164	GO:0009164	nucleoside catabolic process	3/189	32/18866	0.00396362	0.0215938	0.015721	UPB1/DPYS/UPP2	3	geneontology_Biological_Process	Up
GO:1905953	GO:1905953	negative regulation of lipid localization	4/189	65/18866	0.00410386	0.0222984	0.0162339	APOC1/APOC3/CYP4F2/APOA2	4	geneontology_Biological_Process	Up
GO:0015851	GO:0015851	nucleobase transport	2/189	10/18866	0.00426111	0.0227891	0.0165912	AQP9/SLC28A1	2	geneontology_Biological_Process	Up
GO:0015886	GO:0015886	heme transport	2/189	10/18866	0.00426111	0.0227891	0.0165912	HPX/HRG	2	geneontology_Biological_Process	Up
GO:0030388	GO:0030388	fructose 1,6-bisphosphate metabolic process	2/189	10/18866	0.00426111	0.0227891	0.0165912	ALDOB/FBP1	2	geneontology_Biological_Process	Up
GO:0034447	GO:0034447	very-low-density lipoprotein particle clearance	2/189	10/18866	0.00426111	0.0227891	0.0165912	APOC1/APOC3	2	geneontology_Biological_Process	Up
GO:0046487	GO:0046487	glyoxylate metabolic process	2/189	10/18866	0.00426111	0.0227891	0.0165912	AGXT/AGXT2	2	geneontology_Biological_Process	Up
GO:0072530	GO:0072530	purine-containing compound transmembrane transport	2/189	10/18866	0.00426111	0.0227891	0.0165912	AQP9/SLC28A1	2	geneontology_Biological_Process	Up
GO:0010984	GO:0010984	regulation of lipoprotein particle clearance	3/189	33/18866	0.00432818	0.0230874	0.0168083	APOC1/APOC3/GPLD1	3	geneontology_Biological_Process	Up
GO:1903532	GO:1903532	positive regulation of secretion by cell	9/189	313/18866	0.00440463	0.023434	0.0170607	ANG/RBP4/CD14/TFR2/FGA/FGG/GPLD1/SAA1/FGB	9	geneontology_Biological_Process	Up
GO:0002822	GO:0002822	regulation of adaptive immune response based on somatic recombination of immune receptors built from immunoglobulin superfamily domains	6/189	153/18866	0.00447102	0.0237254	0.0172729	HPX/AZGP1/IL27/C4BPB/C4BPA/ARG1	6	geneontology_Biological_Process	Up
GO:0032890	GO:0032890	regulation of organic acid transport	4/189	67/18866	0.00457473	0.0241503	0.0175822	CYP4A11/CYP4F2/SLC38A3/ARG1	4	geneontology_Biological_Process	Up
GO:0070613	GO:0070613	regulation of protein processing	4/189	67/18866	0.00457473	0.0241503	0.0175822	CLEC3B/F12/KLKB1/SERPINF2	4	geneontology_Biological_Process	Up
GO:0000038	GO:0000038	very long-chain fatty acid metabolic process	3/189	34/18866	0.00471242	0.0246858	0.0179721	SLC27A5/CYP4F2/SLC27A2	3	geneontology_Biological_Process	Up
GO:0042558	GO:0042558	pteridine-containing compound metabolic process	3/189	34/18866	0.00471242	0.0246858	0.0179721	FTCD/PIPOX/ALDH1L1	3	geneontology_Biological_Process	Up
GO:0045907	GO:0045907	positive regulation of vasoconstriction	3/189	34/18866	0.00471242	0.0246858	0.0179721	FGA/FGG/FGB	3	geneontology_Biological_Process	Up
GO:0072577	GO:0072577	endothelial cell apoptotic process	4/189	68/18866	0.00482324	0.0252018	0.0183477	FGA/ANGPTL4/FGG/FGB	4	geneontology_Biological_Process	Up
GO:0009112	GO:0009112	nucleobase metabolic process	3/189	35/18866	0.00511664	0.0265581	0.0193351	TTR/DPYS/CPS1	3	geneontology_Biological_Process	Up
GO:0036314	GO:0036314	response to sterol	3/189	35/18866	0.00511664	0.0265581	0.0193351	INSIG1/GPLD1/CYP7A1	3	geneontology_Biological_Process	Up
GO:0042758	GO:0042758	long-chain fatty acid catabolic process	2/189	11/18866	0.00517382	0.0265581	0.0193351	CYP4A11/CYP4F2	2	geneontology_Biological_Process	Up
GO:0046950	GO:0046950	cellular ketone body metabolic process	2/189	11/18866	0.00517382	0.0265581	0.0193351	SLC27A5/HMGCS2	2	geneontology_Biological_Process	Up
GO:0150104	GO:0150104	transport across blood-brain barrier	2/189	11/18866	0.00517382	0.0265581	0.0193351	SLC22A1/MFSD2A	2	geneontology_Biological_Process	Up
GO:2001138	GO:2001138	regulation of phospholipid transport	2/189	11/18866	0.00517382	0.0265581	0.0193351	ABCB4/APOA1	2	geneontology_Biological_Process	Up
GO:2001140	GO:2001140	positive regulation of phospholipid transport	2/189	11/18866	0.00517382	0.0265581	0.0193351	ABCB4/APOA1	2	geneontology_Biological_Process	Up
GO:0030168	GO:0030168	platelet activation	6/189	158/18866	0.00522229	0.0267397	0.0194673	HRG/F2/FGA/FGG/SAA1/FGB	6	geneontology_Biological_Process	Up
GO:0006109	GO:0006109	regulation of carbohydrate metabolic process	7/189	210/18866	0.00532943	0.02722	0.019817	PFKFB1/GNMT/RGN/FBP1/GPT/GCGR/GPLD1	7	geneontology_Biological_Process	Up
GO:0006879	GO:0006879	cellular iron ion homeostasis	4/189	70/18866	0.00534715	0.0272425	0.0198334	HPX/HJV/TFR2/TMPRSS6	4	geneontology_Biological_Process	Up
GO:0002701	GO:0002701	negative regulation of production of molecular mediator of immune response	3/189	36/18866	0.00554113	0.0279519	0.0203499	APOA1/APOA2/ARG1	3	geneontology_Biological_Process	Up
GO:0006213	GO:0006213	pyrimidine nucleoside metabolic process	3/189	36/18866	0.00554113	0.0279519	0.0203499	UPB1/DPYS/UPP2	3	geneontology_Biological_Process	Up
GO:0010543	GO:0010543	regulation of platelet activation	3/189	36/18866	0.00554113	0.0279519	0.0203499	HRG/F2/FGG	3	geneontology_Biological_Process	Up
GO:1901661	GO:1901661	quinone metabolic process	3/189	36/18866	0.00554113	0.0279519	0.0203499	CYP4F2/ADH4/AKR1C4	3	geneontology_Biological_Process	Up
GO:0002713	GO:0002713	negative regulation of B cell mediated immunity	2/189	12/18866	0.00616785	0.0303637	0.0221057	C4BPB/C4BPA	2	geneontology_Biological_Process	Up
GO:0002890	GO:0002890	negative regulation of immunoglobulin mediated immune response	2/189	12/18866	0.00616785	0.0303637	0.0221057	C4BPB/C4BPA	2	geneontology_Biological_Process	Up
GO:0010232	GO:0010232	vascular transport	2/189	12/18866	0.00616785	0.0303637	0.0221057	SLC22A1/MFSD2A	2	geneontology_Biological_Process	Up
GO:0042182	GO:0042182	ketone catabolic process	2/189	12/18866	0.00616785	0.0303637	0.0221057	CYP4F2/ALDH8A1	2	geneontology_Biological_Process	Up
GO:0045117	GO:0045117	azole transmembrane transport	2/189	12/18866	0.00616785	0.0303637	0.0221057	SLC38A3/SLC28A1	2	geneontology_Biological_Process	Up
GO:0046689	GO:0046689	response to mercury ion	2/189	12/18866	0.00616785	0.0303637	0.0221057	TAT/AQP9	2	geneontology_Biological_Process	Up
GO:0071468	GO:0071468	cellular response to acidic pH	2/189	12/18866	0.00616785	0.0303637	0.0221057	PCK1/SLC38A3	2	geneontology_Biological_Process	Up
GO:0072531	GO:0072531	pyrimidine-containing compound transmembrane transport	2/189	12/18866	0.00616785	0.0303637	0.0221057	AQP9/SLC28A1	2	geneontology_Biological_Process	Up
GO:0090209	GO:0090209	negative regulation of triglyceride metabolic process	2/189	12/18866	0.00616785	0.0303637	0.0221057	APOC3/GPLD1	2	geneontology_Biological_Process	Up
GO:1902224	GO:1902224	ketone body metabolic process	2/189	12/18866	0.00616785	0.0303637	0.0221057	SLC27A5/HMGCS2	2	geneontology_Biological_Process	Up
GO:0046916	GO:0046916	cellular transition metal ion homeostasis	5/189	116/18866	0.00626771	0.0307811	0.0224096	HPX/HJV/TFR2/TMPRSS6/MT1X	5	geneontology_Biological_Process	Up
GO:0006644	GO:0006644	phospholipid metabolic process	11/189	455/18866	0.00629693	0.0308504	0.0224601	APOC1/PON1/APOA5/ETNPPL/LCAT/APOA1/HMGCS2/APOA2/MFSD2A/GPLD1/PLA2G2A	11	geneontology_Biological_Process	Up
GO:0006084	GO:0006084	acetyl-CoA metabolic process	3/189	38/18866	0.00645195	0.0315343	0.022958	PIPOX/HMGCS2/ACOT12	3	geneontology_Biological_Process	Up
GO:0006778	GO:0006778	porphyrin-containing compound metabolic process	3/189	39/18866	0.00693878	0.0337522	0.0245727	HPX/AMBP/CYP1A2	3	geneontology_Biological_Process	Up
GO:0072529	GO:0072529	pyrimidine-containing compound catabolic process	3/189	39/18866	0.00693878	0.0337522	0.0245727	UPB1/DPYS/UPP2	3	geneontology_Biological_Process	Up
GO:0002819	GO:0002819	regulation of adaptive immune response	6/189	168/18866	0.00699674	0.0339533	0.0247191	HPX/AZGP1/IL27/C4BPB/C4BPA/ARG1	6	geneontology_Biological_Process	Up
GO:0060193	GO:0060193	positive regulation of lipase activity	4/189	76/18866	0.00714378	0.0345847	0.0251787	ANG/APOA5/APOA1/APOH	4	geneontology_Biological_Process	Up
GO:0002921	GO:0002921	negative regulation of humoral immune response	2/189	13/18866	0.00724149	0.0346472	0.0252243	C4BPB/C4BPA	2	geneontology_Biological_Process	Up
GO:0007494	GO:0007494	midgut development	2/189	13/18866	0.00724149	0.0346472	0.0252243	OTC/CPS1	2	geneontology_Biological_Process	Up
GO:0008228	GO:0008228	opsonization	2/189	13/18866	0.00724149	0.0346472	0.0252243	C4BPB/C4BPA	2	geneontology_Biological_Process	Up
GO:0015697	GO:0015697	quaternary ammonium group transport	2/189	13/18866	0.00724149	0.0346472	0.0252243	SLC22A1/SLC25A47	2	geneontology_Biological_Process	Up
GO:0018206	GO:0018206	peptidyl-methionine modification	2/189	13/18866	0.00724149	0.0346472	0.0252243	APOA1/APOA2	2	geneontology_Biological_Process	Up
GO:0032892	GO:0032892	positive regulation of organic acid transport	3/189	40/18866	0.00744684	0.0355465	0.025879	CYP4A11/CYP4F2/SLC38A3	3	geneontology_Biological_Process	Up
GO:0007584	GO:0007584	response to nutrient	6/189	171/18866	0.00760516	0.0362176	0.0263675	SERPINC1/APOA1/OTC/GCGR/IGFBP2/ARG1	6	geneontology_Biological_Process	Up
GO:0010811	GO:0010811	positive regulation of cell-substrate adhesion	5/189	122/18866	0.00772248	0.0366908	0.026712	HRG/APOA1/FGA/FGG/FGB	5	geneontology_Biological_Process	Up
GO:0032869	GO:0032869	cellular response to insulin stimulus	7/189	226/18866	0.00786228	0.0372683	0.0271325	PCK1/PCK2/GPT/INSIG1/GPLD1/IGFBP1/AHSG	7	geneontology_Biological_Process	Up
GO:1902042	GO:1902042	negative regulation of extrinsic apoptotic signaling pathway via death domain receptors	3/189	41/18866	0.00797637	0.0377216	0.0274625	FGA/FGG/FGB	3	geneontology_Biological_Process	Up
GO:0043270	GO:0043270	positive regulation of ion transport	8/189	284/18866	0.00800719	0.0377799	0.0275049	CYP4A11/CYP4F2/RGN/ABCB4/APOA1/F2/SLC38A3/FXYD1	8	geneontology_Biological_Process	Up
GO:0032488	GO:0032488	Cdc42 protein signal transduction	2/189	14/18866	0.00839306	0.039238	0.0285665	APOC3/APOA1	2	geneontology_Biological_Process	Up
GO:0051791	GO:0051791	medium-chain fatty acid metabolic process	2/189	14/18866	0.00839306	0.039238	0.0285665	CYP4A22/CYP4A11	2	geneontology_Biological_Process	Up
GO:1901569	GO:1901569	fatty acid derivative catabolic process	2/189	14/18866	0.00839306	0.039238	0.0285665	CYP4A11/CYP4F2	2	geneontology_Biological_Process	Up
GO:1901678	GO:1901678	iron coordination entity transport	2/189	14/18866	0.00839306	0.039238	0.0285665	HPX/HRG	2	geneontology_Biological_Process	Up
GO:0002707	GO:0002707	negative regulation of lymphocyte mediated immunity	3/189	42/18866	0.00852754	0.0394158	0.0286959	C4BPB/C4BPA/ARG1	3	geneontology_Biological_Process	Up
GO:0009268	GO:0009268	response to pH	3/189	42/18866	0.00852754	0.0394158	0.0286959	PCK1/SLC38A3/GPLD1	3	geneontology_Biological_Process	Up
GO:0010907	GO:0010907	positive regulation of glucose metabolic process	3/189	42/18866	0.00852754	0.0394158	0.0286959	RGN/GPT/GPLD1	3	geneontology_Biological_Process	Up
GO:0044058	GO:0044058	regulation of digestive system process	3/189	42/18866	0.00852754	0.0394158	0.0286959	APOA5/APOA1/APOA2	3	geneontology_Biological_Process	Up
GO:1901658	GO:1901658	glycosyl compound catabolic process	3/189	42/18866	0.00852754	0.0394158	0.0286959	UPB1/DPYS/UPP2	3	geneontology_Biological_Process	Up
GO:0002823	GO:0002823	negative regulation of adaptive immune response based on somatic recombination of immune receptors built from immunoglobulin superfamily domains	3/189	43/18866	0.00910056	0.0418749	0.0304862	C4BPB/C4BPA/ARG1	3	geneontology_Biological_Process	Up
GO:0046717	GO:0046717	acid secretion	3/189	43/18866	0.00910056	0.0418749	0.0304862	AGXT/SLC51A/ABCB4	3	geneontology_Biological_Process	Up
GO:0009404	GO:0009404	toxin metabolic process	2/189	15/18866	0.00962091	0.043874	0.0319416	AKR7A3/CYP1A2	2	geneontology_Biological_Process	Up
GO:0016114	GO:0016114	terpenoid biosynthetic process	2/189	15/18866	0.00962091	0.043874	0.0319416	HMGCS2/ALDH8A1	2	geneontology_Biological_Process	Up
GO:0018158	GO:0018158	protein oxidation	2/189	15/18866	0.00962091	0.043874	0.0319416	APOA1/APOA2	2	geneontology_Biological_Process	Up
GO:0045820	GO:0045820	negative regulation of glycolytic process	2/189	15/18866	0.00962091	0.043874	0.0319416	PFKFB1/FBP1	2	geneontology_Biological_Process	Up
GO:1901657	GO:1901657	glycosyl compound metabolic process	5/189	129/18866	0.00969877	0.0441305	0.0321284	GNMT/UPB1/DPYS/AKR1C4/UPP2	5	geneontology_Biological_Process	Up
GO:0045913	GO:0045913	positive regulation of carbohydrate metabolic process	4/189	84/18866	0.0101025	0.0458652	0.0333913	PFKFB1/RGN/GPT/GPLD1	4	geneontology_Biological_Process	Up
GO:0006775	GO:0006775	fat-soluble vitamin metabolic process	3/189	45/18866	0.0103128	0.0466534	0.0339651	CYP4F2/CYP11A1/CYP3A4	3	geneontology_Biological_Process	Up
GO:0006766	GO:0006766	vitamin metabolic process	5/189	131/18866	0.0103217	0.0466534	0.0339651	CYP4F2/RGN/CYP11A1/ALDH1L1/CYP3A4	5	geneontology_Biological_Process	Up
GO:0072527	GO:0072527	pyrimidine-containing compound metabolic process	4/189	85/18866	0.0105203	0.0474456	0.0345419	UPB1/DPYS/CPS1/UPP2	4	geneontology_Biological_Process	Up
GO:0022900	GO:0022900	electron transport chain	6/189	184/18866	0.0106883	0.0480974	0.0350164	HAAO/RDH16/HSD17B6/AKR7A3/AKR1C4/CYP1A2	6	geneontology_Biological_Process	Up
GO:0050727	GO:0050727	regulation of inflammatory response	10/189	425/18866	0.0107793	0.0484004	0.035237	F12/KLKB1/DNASE1L3/FABP4/APOA1/F2/PGLYRP2/SAA1/AHSG/PLA2G2A	10	geneontology_Biological_Process	Up
GO:0001977	GO:0001977	renal system process involved in regulation of blood volume	2/189	16/18866	0.0109234	0.0484321	0.0352601	CYP4A11/CYP4F2	2	geneontology_Biological_Process	Up
GO:0006206	GO:0006206	pyrimidine nucleobase metabolic process	2/189	16/18866	0.0109234	0.0484321	0.0352601	DPYS/CPS1	2	geneontology_Biological_Process	Up
GO:0019372	GO:0019372	lipoxygenase pathway	2/189	16/18866	0.0109234	0.0484321	0.0352601	PON1/PON3	2	geneontology_Biological_Process	Up
GO:0034310	GO:0034310	primary alcohol catabolic process	2/189	16/18866	0.0109234	0.0484321	0.0352601	HAO1/SULT2A1	2	geneontology_Biological_Process	Up
GO:0046500	GO:0046500	S-adenosylmethionine metabolic process	2/189	16/18866	0.0109234	0.0484321	0.0352601	GNMT/MAT1A	2	geneontology_Biological_Process	Up
GO:0034637	GO:0034637	cellular carbohydrate biosynthetic process	4/189	86/18866	0.010949	0.0484321	0.0352601	PCK1/PCK2/GYS2/FBP1	4	geneontology_Biological_Process	Up
GO:0032309	GO:0032309	icosanoid secretion	3/189	46/18866	0.0109523	0.0484321	0.0352601	CYP4A11/CYP4F2/PLA2G2A	3	geneontology_Biological_Process	Up
GO:0051262	GO:0051262	protein tetramerization	4/189	87/18866	0.011389	0.0501458	0.0365077	GNMT/MAT1A/UPB1/CTH	4	geneontology_Biological_Process	Up
GO:0055072	GO:0055072	iron ion homeostasis	4/189	87/18866	0.011389	0.0501458	0.0365077	HPX/HJV/TFR2/TMPRSS6	4	geneontology_Biological_Process	Up
GO:0042593	GO:0042593	glucose homeostasis	7/189	245/18866	0.0119138	0.0523438	0.0381079	RBP4/ACSM2A/PCK1/PCK2/GCGR/GPLD1/CYP7A1	7	geneontology_Biological_Process	Up
GO:0033500	GO:0033500	carbohydrate homeostasis	7/189	246/18866	0.0121621	0.0533201	0.0388187	RBP4/ACSM2A/PCK1/PCK2/GCGR/GPLD1/CYP7A1	7	geneontology_Biological_Process	Up
GO:0002820	GO:0002820	negative regulation of adaptive immune response	3/189	48/18866	0.0122989	0.0533478	0.0388389	C4BPB/C4BPA/ARG1	3	geneontology_Biological_Process	Up
GO:0032305	GO:0032305	positive regulation of icosanoid secretion	2/189	17/18866	0.012299	0.0533478	0.0388389	CYP4A11/CYP4F2	2	geneontology_Biological_Process	Up
GO:0044539	GO:0044539	long-chain fatty acid import into cell	2/189	17/18866	0.012299	0.0533478	0.0388389	SLC27A5/SLC27A2	2	geneontology_Biological_Process	Up
GO:0046459	GO:0046459	short-chain fatty acid metabolic process	2/189	17/18866	0.012299	0.0533478	0.0388389	PCK1/PCK2	2	geneontology_Biological_Process	Up
GO:0140354	GO:0140354	lipid import into cell	2/189	17/18866	0.012299	0.0533478	0.0388389	SLC27A5/SLC27A2	2	geneontology_Biological_Process	Up
GO:0055076	GO:0055076	transition metal ion homeostasis	5/189	138/18866	0.0127174	0.0550459	0.0400752	HPX/HJV/TFR2/TMPRSS6/MT1X	5	geneontology_Biological_Process	Up
GO:0002673	GO:0002673	regulation of acute inflammatory response	3/189	49/18866	0.0130062	0.0557058	0.0405556	F12/KLKB1/DNASE1L3	3	geneontology_Biological_Process	Up
GO:0006111	GO:0006111	regulation of gluconeogenesis	3/189	49/18866	0.0130062	0.0557058	0.0405556	GNMT/FBP1/GPT	3	geneontology_Biological_Process	Up
GO:0006692	GO:0006692	prostanoid metabolic process	3/189	49/18866	0.0130062	0.0557058	0.0405556	CES2/GSTA1/AKR1C4	3	geneontology_Biological_Process	Up
GO:0006693	GO:0006693	prostaglandin metabolic process	3/189	49/18866	0.0130062	0.0557058	0.0405556	CES2/GSTA1/AKR1C4	3	geneontology_Biological_Process	Up
GO:0034656	GO:0034656	nucleobase-containing small molecule catabolic process	3/189	49/18866	0.0130062	0.0557058	0.0405556	UPB1/DPYS/UPP2	3	geneontology_Biological_Process	Up
GO:0071248	GO:0071248	cellular response to metal ion	6/189	193/18866	0.0132843	0.0567777	0.041336	FBP1/TFR2/FABP4/GPLD1/MT1X/CYP1A2	6	geneontology_Biological_Process	Up
GO:0071715	GO:0071715	icosanoid transport	3/189	50/18866	0.0137363	0.0583848	0.042506	CYP4A11/CYP4F2/PLA2G2A	3	geneontology_Biological_Process	Up
GO:1901571	GO:1901571	fatty acid derivative transport	3/189	50/18866	0.0137363	0.0583848	0.042506	CYP4A11/CYP4F2/PLA2G2A	3	geneontology_Biological_Process	Up
GO:0052695	GO:0052695	cellular glucuronidation	2/189	18/18866	0.013746	0.0583848	0.042506	UGT2B7/UGT2B15	2	geneontology_Biological_Process	Up
GO:0048732	GO:0048732	gland development	10/189	443/18866	0.0140725	0.0596474	0.0434252	SERPINC1/PCK1/PCK2/RGN/CDO1/APOA1/OTC/BAAT/CPS1/ARG1	10	geneontology_Biological_Process	Up
GO:0009749	GO:0009749	response to glucose	6/189	197/18866	0.0145688	0.0616231	0.0448636	PCK1/PCK2/GYS2/APOA2/GPLD1/CYP7A1	6	geneontology_Biological_Process	Up
GO:1904035	GO:1904035	regulation of epithelial cell apoptotic process	4/189	94/18866	0.0147879	0.062421	0.0454444	FGA/ANGPTL4/FGG/FGB	4	geneontology_Biological_Process	Up
GO:0002791	GO:0002791	regulation of peptide secretion	9/189	381/18866	0.0148706	0.0626407	0.0456044	ANG/RBP4/CD14/TFR2/FGA/FGG/GPLD1/SAA1/FGB	9	geneontology_Biological_Process	Up
GO:0002700	GO:0002700	regulation of production of molecular mediator of immune response	5/189	144/18866	0.0150495	0.0632595	0.0460549	RBP4/HPX/APOA1/APOA2/ARG1	5	geneontology_Biological_Process	Up
GO:0002922	GO:0002922	positive regulation of humoral immune response	2/189	19/18866	0.015263	0.0632595	0.0460549	HPX/C6	2	geneontology_Biological_Process	Up
GO:0006704	GO:0006704	glucocorticoid biosynthetic process	2/189	19/18866	0.015263	0.0632595	0.0460549	CYP11A1/HSD11B1	2	geneontology_Biological_Process	Up
GO:0010544	GO:0010544	negative regulation of platelet activation	2/189	19/18866	0.015263	0.0632595	0.0460549	F2/FGG	2	geneontology_Biological_Process	Up
GO:0010985	GO:0010985	negative regulation of lipoprotein particle clearance	2/189	19/18866	0.015263	0.0632595	0.0460549	APOC1/APOC3	2	geneontology_Biological_Process	Up
GO:0015802	GO:0015802	basic amino acid transport	2/189	19/18866	0.015263	0.0632595	0.0460549	SLC38A3/ARG1	2	geneontology_Biological_Process	Up
GO:0032026	GO:0032026	response to magnesium ion	2/189	19/18866	0.015263	0.0632595	0.0460549	CD14/FBP1	2	geneontology_Biological_Process	Up
GO:0002704	GO:0002704	negative regulation of leukocyte mediated immunity	3/189	52/18866	0.0152653	0.0632595	0.0460549	C4BPB/C4BPA/ARG1	3	geneontology_Biological_Process	Up
GO:0032964	GO:0032964	collagen biosynthetic process	3/189	53/18866	0.0160643	0.0663018	0.0482698	SERPINF2/F2/ARG1	3	geneontology_Biological_Process	Up
GO:0071320	GO:0071320	cellular response to cAMP	3/189	53/18866	0.0160643	0.0663018	0.0482698	PCK1/AQP9/CPS1	3	geneontology_Biological_Process	Up
GO:0009746	GO:0009746	response to hexose	6/189	202/18866	0.0162929	0.0671098	0.048858	PCK1/PCK2/GYS2/APOA2/GPLD1/CYP7A1	6	geneontology_Biological_Process	Up
GO:0009896	GO:0009896	positive regulation of catabolic process	10/189	454/18866	0.0164261	0.067522	0.0491582	RIDA/PFKFB1/APOA5/RGN/C4BPB/APOA1/C4BPA/APOA2/GPLD1/FABP1	10	geneontology_Biological_Process	Up
GO:0006525	GO:0006525	arginine metabolic process	2/189	20/18866	0.0168483	0.0684315	0.0498203	OTC/ARG1	2	geneontology_Biological_Process	Up
GO:0010875	GO:0010875	positive regulation of cholesterol efflux	2/189	20/18866	0.0168483	0.0684315	0.0498203	PON1/APOA1	2	geneontology_Biological_Process	Up
GO:0031998	GO:0031998	regulation of fatty acid beta-oxidation	2/189	20/18866	0.0168483	0.0684315	0.0498203	MFSD2A/FABP1	2	geneontology_Biological_Process	Up
GO:0032303	GO:0032303	regulation of icosanoid secretion	2/189	20/18866	0.0168483	0.0684315	0.0498203	CYP4A11/CYP4F2	2	geneontology_Biological_Process	Up
GO:1902644	GO:1902644	tertiary alcohol metabolic process	2/189	20/18866	0.0168483	0.0684315	0.0498203	CYP11A1/AKR1C4	2	geneontology_Biological_Process	Up
GO:2000193	GO:2000193	positive regulation of fatty acid transport	2/189	20/18866	0.0168483	0.0684315	0.0498203	CYP4A11/CYP4F2	2	geneontology_Biological_Process	Up
GO:0050830	GO:0050830	defense response to Gram-positive bacterium	4/189	99/18866	0.0175697	0.0712199	0.0518504	ANG/ZG16/PGLYRP2/PLA2G2A	4	geneontology_Biological_Process	Up
GO:0031330	GO:0031330	negative regulation of cellular catabolic process	7/189	265/18866	0.0176203	0.0712713	0.0518877	APOC1/HP/APOC3/RGN/F13B/MFSD2A/GPLD1	7	geneontology_Biological_Process	Up
GO:1905039	GO:1905039	carboxylic acid transmembrane transport	5/189	150/18866	0.0176521	0.0712713	0.0518877	SLC27A5/SLC13A5/AQP9/SLC38A3/THRSP	5	geneontology_Biological_Process	Up
GO:1903825	GO:1903825	organic acid transmembrane transport	5/189	151/18866	0.018113	0.0729879	0.0531375	SLC27A5/SLC13A5/AQP9/SLC38A3/THRSP	5	geneontology_Biological_Process	Up
GO:0034284	GO:0034284	response to monosaccharide	6/189	207/18866	0.0181533	0.0730065	0.053151	PCK1/PCK2/GYS2/APOA2/GPLD1/CYP7A1	6	geneontology_Biological_Process	Up
GO:0009110	GO:0009110	vitamin biosynthetic process	2/189	21/18866	0.0185005	0.0735341	0.0535352	RGN/CYP3A4	2	geneontology_Biological_Process	Up
GO:0016540	GO:0016540	protein autoprocessing	2/189	21/18866	0.0185005	0.0735341	0.0535352	HJV/F12	2	geneontology_Biological_Process	Up
GO:0042402	GO:0042402	cellular biogenic amine catabolic process	2/189	21/18866	0.0185005	0.0735341	0.0535352	HAAO/BHMT	2	geneontology_Biological_Process	Up
GO:0071397	GO:0071397	cellular response to cholesterol	2/189	21/18866	0.0185005	0.0735341	0.0535352	GPLD1/CYP7A1	2	geneontology_Biological_Process	Up
GO:1900543	GO:1900543	negative regulation of purine nucleotide metabolic process	2/189	21/18866	0.0185005	0.0735341	0.0535352	PFKFB1/FBP1	2	geneontology_Biological_Process	Up
GO:2000047	GO:2000047	regulation of cell-cell adhesion mediated by cadherin	2/189	21/18866	0.0185005	0.0735341	0.0535352	PLG/SERPINF2	2	geneontology_Biological_Process	Up
GO:0002712	GO:0002712	regulation of B cell mediated immunity	3/189	56/18866	0.0186004	0.0736446	0.0536156	HPX/C4BPB/C4BPA	3	geneontology_Biological_Process	Up
GO:0002889	GO:0002889	regulation of immunoglobulin mediated immune response	3/189	56/18866	0.0186004	0.0736446	0.0536156	HPX/C4BPB/C4BPA	3	geneontology_Biological_Process	Up
GO:0002706	GO:0002706	regulation of lymphocyte mediated immunity	5/189	154/18866	0.0195432	0.0772278	0.0562243	HPX/AZGP1/C4BPB/C4BPA/ARG1	5	geneontology_Biological_Process	Up
GO:0008654	GO:0008654	phospholipid biosynthetic process	7/189	271/18866	0.0196546	0.0775179	0.0564355	ETNPPL/LCAT/APOA1/HMGCS2/APOA2/MFSD2A/PLA2G2A	7	geneontology_Biological_Process	Up
GO:0002703	GO:0002703	regulation of leukocyte mediated immunity	6/189	211/18866	0.0197429	0.0777161	0.0565798	HPX/AZGP1/DNASE1L3/C4BPB/C4BPA/ARG1	6	geneontology_Biological_Process	Up
GO:0042359	GO:0042359	vitamin D metabolic process	2/189	22/18866	0.0202181	0.0792814	0.0577194	CYP11A1/CYP3A4	2	geneontology_Biological_Process	Up
GO:0045980	GO:0045980	negative regulation of nucleotide metabolic process	2/189	22/18866	0.0202181	0.0792814	0.0577194	PFKFB1/FBP1	2	geneontology_Biological_Process	Up
GO:0090276	GO:0090276	regulation of peptide hormone secretion	6/189	213/18866	0.0205721	0.080515	0.0586175	RBP4/TFR2/FGA/FGG/GPLD1/FGB	6	geneontology_Biological_Process	Up
GO:0009116	GO:0009116	nucleoside metabolic process	4/189	104/18866	0.0206573	0.0806938	0.0587476	GNMT/UPB1/DPYS/UPP2	4	geneontology_Biological_Process	Up
GO:0019731	GO:0019731	antibacterial humoral response	3/189	59/18866	0.0213458	0.0830657	0.0604744	ANG/FGA/FGB	3	geneontology_Biological_Process	Up
GO:0071385	GO:0071385	cellular response to glucocorticoid stimulus	3/189	59/18866	0.0213458	0.0830657	0.0604744	PCK1/PCK2/ARG1	3	geneontology_Biological_Process	Up
GO:0070374	GO:0070374	positive regulation of ERK1 and ERK2 cascade	6/189	215/18866	0.0214247	0.0832144	0.0605827	CCL16/SERPINF2/FGA/FGG/FGB/PLA2G2A	6	geneontology_Biological_Process	Up
GO:0034446	GO:0034446	substrate adhesion-dependent cell spreading	4/189	106/18866	0.0219798	0.0846428	0.0616226	APOA1/FGA/FGG/FGB	4	geneontology_Biological_Process	Up
GO:0006541	GO:0006541	glutamine metabolic process	2/189	23/18866	0.0219997	0.0846428	0.0616226	GLYATL1/CPS1	2	geneontology_Biological_Process	Up
GO:0009310	GO:0009310	amine catabolic process	2/189	23/18866	0.0219997	0.0846428	0.0616226	HAAO/BHMT	2	geneontology_Biological_Process	Up
GO:0010226	GO:0010226	response to lithium ion	2/189	23/18866	0.0219997	0.0846428	0.0616226	FABP4/IGFBP2	2	geneontology_Biological_Process	Up
GO:1902001	GO:1902001	fatty acid transmembrane transport	2/189	23/18866	0.0219997	0.0846428	0.0616226	SLC27A5/THRSP	2	geneontology_Biological_Process	Up
GO:0010810	GO:0010810	regulation of cell-substrate adhesion	6/189	217/18866	0.022301	0.0853452	0.062134	HRG/APOA1/PLG/FGA/FGG/FGB	6	geneontology_Biological_Process	Up
GO:0019229	GO:0019229	regulation of vasoconstriction	3/189	60/18866	0.0223076	0.0853452	0.062134	FGA/FGG/FGB	3	geneontology_Biological_Process	Up
GO:0032732	GO:0032732	positive regulation of interleukin-1 production	3/189	60/18866	0.0223076	0.0853452	0.062134	ORM2/ORM1/SAA1	3	geneontology_Biological_Process	Up
GO:0033013	GO:0033013	tetrapyrrole metabolic process	3/189	61/18866	0.0232927	0.0887815	0.0646357	HPX/AMBP/CYP1A2	3	geneontology_Biological_Process	Up
GO:1902041	GO:1902041	regulation of extrinsic apoptotic signaling pathway via death domain receptors	3/189	61/18866	0.0232927	0.0887815	0.0646357	FGA/FGG/FGB	3	geneontology_Biological_Process	Up
GO:0001909	GO:0001909	leukocyte mediated cytotoxicity	4/189	108/18866	0.023353	0.0888459	0.0646826	AZGP1/DNASE1L3/F2/ARG1	4	geneontology_Biological_Process	Up
GO:0071241	GO:0071241	cellular response to inorganic substance	6/189	221/18866	0.0241255	0.0915398	0.0666438	FBP1/TFR2/FABP4/GPLD1/MT1X/CYP1A2	6	geneontology_Biological_Process	Up
GO:0009267	GO:0009267	cellular response to starvation	5/189	163/18866	0.0242724	0.0915398	0.0666438	PCK1/GCGR/SLC38A3/MFSD2A/ALB	5	geneontology_Biological_Process	Up
GO:0055081	GO:0055081	anion homeostasis	3/189	62/18866	0.0243011	0.0915398	0.0666438	APOA1/OTC/CPS1	3	geneontology_Biological_Process	Up
GO:0070527	GO:0070527	platelet aggregation	3/189	62/18866	0.0243011	0.0915398	0.0666438	FGA/FGG/FGB	3	geneontology_Biological_Process	Up
GO:0071384	GO:0071384	cellular response to corticosteroid stimulus	3/189	62/18866	0.0243011	0.0915398	0.0666438	PCK1/PCK2/ARG1	3	geneontology_Biological_Process	Up
GO:0042742	GO:0042742	defense response to bacterium	8/189	348/18866	0.0243299	0.0915398	0.0666438	ANG/HP/ZG16/F2/FGA/PGLYRP2/FGB/PLA2G2A	8	geneontology_Biological_Process	Up
GO:0002699	GO:0002699	positive regulation of immune effector process	6/189	223/18866	0.0250741	0.0941663	0.0685561	RBP4/HPX/C6/AZGP1/PCK1/ARG1	6	geneontology_Biological_Process	Up
GO:0032652	GO:0032652	regulation of interleukin-1 production	4/189	111/18866	0.0255087	0.0956226	0.0696163	APOA1/ORM2/ORM1/SAA1	4	geneontology_Biological_Process	Up
GO:0010447	GO:0010447	response to acidic pH	2/189	25/18866	0.0257488	0.0959943	0.0698869	PCK1/SLC38A3	2	geneontology_Biological_Process	Up
GO:0060330	GO:0060330	regulation of response to interferon-gamma	2/189	25/18866	0.0257488	0.0959943	0.0698869	HPX/ARG1	2	geneontology_Biological_Process	Up
GO:0060334	GO:0060334	regulation of interferon-gamma-mediated signaling pathway	2/189	25/18866	0.0257488	0.0959943	0.0698869	HPX/ARG1	2	geneontology_Biological_Process	Up
GO:0050708	GO:0050708	regulation of protein secretion	8/189	352/18866	0.0258139	0.0960617	0.0699359	ANG/RBP4/CD14/FGA/FGG/GPLD1/SAA1/FGB	8	geneontology_Biological_Process	Up
GO:0002283	GO:0002283	neutrophil activation involved in immune response	10/189	490/18866	0.0261867	0.0972716	0.0708168	HP/CD14/TTR/A1BG/DNASE1L3/ORM2/SLC27A2/ORM1/ARG1/AHSG	10	geneontology_Biological_Process	Up
GO:0072593	GO:0072593	reactive oxygen species metabolic process	7/189	288/18866	0.0263002	0.0975158	0.0709946	HP/PON3/RGN/AGXT2/F2/CPS1/CYP1A2	7	geneontology_Biological_Process	Up
GO:0046173	GO:0046173	polyol biosynthetic process	3/189	64/18866	0.0263878	0.0976634	0.071102	PCK1/PCK2/CYP3A4	3	geneontology_Biological_Process	Up
GO:0051222	GO:0051222	positive regulation of protein transport	8/189	354/18866	0.0265792	0.0981939	0.0714883	ANG/RBP4/CD14/FGA/FGG/GPLD1/SAA1/FGB	8	geneontology_Biological_Process	Up
GO:0032963	GO:0032963	collagen metabolic process	4/189	113/18866	0.0270103	0.0996065	0.0725167	SERPINF2/F2/TMPRSS6/ARG1	4	geneontology_Biological_Process	Up
GO:0032967	GO:0032967	positive regulation of collagen biosynthetic process	2/189	26/18866	0.0277136	0.101833	0.0741374	SERPINF2/F2	2	geneontology_Biological_Process	Up
GO:0043567	GO:0043567	regulation of insulin-like growth factor receptor signaling pathway	2/189	26/18866	0.0277136	0.101833	0.0741374	IGFBP2/IGFBP1	2	geneontology_Biological_Process	Up
GO:0043200	GO:0043200	response to amino acid	4/189	114/18866	0.0277805	0.101895	0.0741829	PCK1/CDO1/CPS1/ARG1	4	geneontology_Biological_Process	Up
GO:0006096	GO:0006096	glycolytic process	4/189	115/18866	0.0285638	0.104116	0.0758	ALDOB/PFKFB1/FBP1/OGDHL	4	geneontology_Biological_Process	Up
GO:0032609	GO:0032609	interferon-gamma production	4/189	115/18866	0.0285638	0.104116	0.0758	CD14/IL27/ZG16/PGLYRP2	4	geneontology_Biological_Process	Up
GO:2000378	GO:2000378	negative regulation of reactive oxygen species metabolic process	3/189	66/18866	0.0285675	0.104116	0.0758	HP/PON3/RGN	3	geneontology_Biological_Process	Up
GO:0046474	GO:0046474	glycerophospholipid biosynthetic process	6/189	230/18866	0.0285899	0.104116	0.0758	ETNPPL/LCAT/APOA1/APOA2/MFSD2A/PLA2G2A	6	geneontology_Biological_Process	Up
GO:0045785	GO:0045785	positive regulation of cell adhesion	9/189	428/18866	0.0288727	0.104959	0.0764134	PCK1/HRG/APOA1/SERPINF2/FGA/FGG/SAA1/FGB/IGFBP2	9	geneontology_Biological_Process	Up
GO:0006757	GO:0006757	ATP generation from ADP	4/189	116/18866	0.02936	0.106541	0.0775652	ALDOB/PFKFB1/FBP1/OGDHL	4	geneontology_Biological_Process	Up
GO:0009065	GO:0009065	glutamine family amino acid catabolic process	2/189	27/18866	0.0297367	0.107526	0.0782823	DAO/ARG1	2	geneontology_Biological_Process	Up
GO:0010714	GO:0010714	positive regulation of collagen metabolic process	2/189	27/18866	0.0297367	0.107526	0.0782823	SERPINF2/F2	2	geneontology_Biological_Process	Up
GO:1904019	GO:1904019	epithelial cell apoptotic process	4/189	117/18866	0.0301694	0.108785	0.0791989	FGA/ANGPTL4/FGG/FGB	4	geneontology_Biological_Process	Up
GO:0009743	GO:0009743	response to carbohydrate	6/189	233/18866	0.0301914	0.108785	0.0791989	PCK1/PCK2/GYS2/APOA2/GPLD1/CYP7A1	6	geneontology_Biological_Process	Up
GO:0097305	GO:0097305	response to alcohol	6/189	234/18866	0.030738	0.11056	0.0804909	RBP4/CD14/CDO1/GPLD1/CYP7A1/CYP2E1	6	geneontology_Biological_Process	Up
GO:0050766	GO:0050766	positive regulation of phagocytosis	3/189	68/18866	0.03084	0.110731	0.0806157	APOA1/APOA2/AHSG	3	geneontology_Biological_Process	Up
GO:0008299	GO:0008299	isoprenoid biosynthetic process	2/189	28/18866	0.0318168	0.113243	0.0824448	HMGCS2/ALDH8A1	2	geneontology_Biological_Process	Up
GO:0044331	GO:0044331	cell-cell adhesion mediated by cadherin	2/189	28/18866	0.0318168	0.113243	0.0824448	PLG/SERPINF2	2	geneontology_Biological_Process	Up
GO:0071280	GO:0071280	cellular response to copper ion	2/189	28/18866	0.0318168	0.113243	0.0824448	MT1X/CYP1A2	2	geneontology_Biological_Process	Up
GO:1903579	GO:1903579	negative regulation of ATP metabolic process	2/189	28/18866	0.0318168	0.113243	0.0824448	PFKFB1/FBP1	2	geneontology_Biological_Process	Up
GO:2000191	GO:2000191	regulation of fatty acid transport	2/189	28/18866	0.0318168	0.113243	0.0824448	CYP4A11/CYP4F2	2	geneontology_Biological_Process	Up
GO:0030324	GO:0030324	lung development	5/189	177/18866	0.0329927	0.117225	0.0853432	RBP4/RIDA/ARG1/HSD11B1/CYP1A2	5	geneontology_Biological_Process	Up
GO:0022407	GO:0022407	regulation of cell-cell adhesion	9/189	439/18866	0.0331665	0.117637	0.0856438	PCK1/APOA1/PLG/SERPINF2/FGA/FGG/FGB/IGFBP2/ARG1	9	geneontology_Biological_Process	Up
GO:1904951	GO:1904951	positive regulation of establishment of protein localization	8/189	370/18866	0.0332772	0.117826	0.0857807	ANG/RBP4/CD14/FGA/FGG/GPLD1/SAA1/FGB	8	geneontology_Biological_Process	Up
GO:0032612	GO:0032612	interleukin-1 production	4/189	121/18866	0.0335381	0.118544	0.0863037	APOA1/ORM2/ORM1/SAA1	4	geneontology_Biological_Process	Up
GO:0051260	GO:0051260	protein homooligomerization	5/189	178/18866	0.0336812	0.118844	0.0865222	GNMT/MAT1A/UPB1/CTH/C9	5	geneontology_Biological_Process	Up
GO:0009435	GO:0009435	NAD biosynthetic process	2/189	29/18866	0.0339525	0.119389	0.0869189	ASPDH/HAAO	2	geneontology_Biological_Process	Up
GO:0048261	GO:0048261	negative regulation of receptor-mediated endocytosis	2/189	29/18866	0.0339525	0.119389	0.0869189	APOC1/APOC3	2	geneontology_Biological_Process	Up
GO:0045471	GO:0045471	response to ethanol	4/189	122/18866	0.0344132	0.120801	0.087947	RBP4/CD14/CDO1/CYP2E1	4	geneontology_Biological_Process	Up
GO:0030323	GO:0030323	respiratory tube development	5/189	181/18866	0.0358	0.125454	0.0913342	RBP4/RIDA/ARG1/HSD11B1/CYP1A2	5	geneontology_Biological_Process	Up
GO:0046337	GO:0046337	phosphatidylethanolamine metabolic process	2/189	30/18866	0.0361425	0.126217	0.0918896	ETNPPL/PLA2G2A	2	geneontology_Biological_Process	Up
GO:0070723	GO:0070723	response to cholesterol	2/189	30/18866	0.0361425	0.126217	0.0918896	GPLD1/CYP7A1	2	geneontology_Biological_Process	Up
GO:0046031	GO:0046031	ADP metabolic process	4/189	124/18866	0.0362031	0.126217	0.0918896	ALDOB/PFKFB1/FBP1/OGDHL	4	geneontology_Biological_Process	Up
GO:0005977	GO:0005977	glycogen metabolic process	3/189	73/18866	0.0369238	0.12851	0.0935593	GYS2/GNMT/GCGR	3	geneontology_Biological_Process	Up
GO:0006073	GO:0006073	cellular glucan metabolic process	3/189	74/18866	0.0382091	0.132307	0.0963237	GYS2/GNMT/GCGR	3	geneontology_Biological_Process	Up
GO:0006635	GO:0006635	fatty acid beta-oxidation	3/189	74/18866	0.0382091	0.132307	0.0963237	SLC27A2/MFSD2A/FABP1	3	geneontology_Biological_Process	Up
GO:0044042	GO:0044042	glucan metabolic process	3/189	74/18866	0.0382091	0.132307	0.0963237	GYS2/GNMT/GCGR	3	geneontology_Biological_Process	Up
GO:0002675	GO:0002675	positive regulation of acute inflammatory response	2/189	31/18866	0.0383856	0.132693	0.0966049	F12/KLKB1	2	geneontology_Biological_Process	Up
GO:0001910	GO:0001910	regulation of leukocyte mediated cytotoxicity	3/189	75/18866	0.0395169	0.135914	0.0989499	AZGP1/DNASE1L3/ARG1	3	geneontology_Biological_Process	Up
GO:0043627	GO:0043627	response to estrogen	3/189	75/18866	0.0395169	0.135914	0.0989499	APOA1/APOA2/IGFBP2	3	geneontology_Biological_Process	Up
GO:0061844	GO:0061844	antimicrobial humoral immune response mediated by antimicrobial peptide	3/189	75/18866	0.0395169	0.135914	0.0989499	ANG/HRG/F2	3	geneontology_Biological_Process	Up
GO:0019359	GO:0019359	nicotinamide nucleotide biosynthetic process	2/189	32/18866	0.0406804	0.138748	0.101013	ASPDH/HAAO	2	geneontology_Biological_Process	Up
GO:0019363	GO:0019363	pyridine nucleotide biosynthetic process	2/189	32/18866	0.0406804	0.138748	0.101013	ASPDH/HAAO	2	geneontology_Biological_Process	Up
GO:0042168	GO:0042168	heme metabolic process	2/189	32/18866	0.0406804	0.138748	0.101013	HPX/AMBP	2	geneontology_Biological_Process	Up
GO:0042219	GO:0042219	cellular modified amino acid catabolic process	2/189	32/18866	0.0406804	0.138748	0.101013	BHMT/ALDH1L1	2	geneontology_Biological_Process	Up
GO:0046320	GO:0046320	regulation of fatty acid oxidation	2/189	32/18866	0.0406804	0.138748	0.101013	MFSD2A/FABP1	2	geneontology_Biological_Process	Up
GO:1903524	GO:1903524	positive regulation of blood circulation	3/189	76/18866	0.0408473	0.139085	0.101258	FGA/FGG/FGB	3	geneontology_Biological_Process	Up
GO:0042310	GO:0042310	vasoconstriction	3/189	78/18866	0.0435753	0.148127	0.107841	FGA/FGG/FGB	3	geneontology_Biological_Process	Up
GO:0001101	GO:0001101	response to acid chemical	4/189	132/18866	0.0438923	0.14871	0.108265	PCK1/CDO1/CPS1/ARG1	4	geneontology_Biological_Process	Up
GO:0019751	GO:0019751	polyol metabolic process	4/189	132/18866	0.0438923	0.14871	0.108265	PCK1/PCK2/MOGAT2/CYP3A4	4	geneontology_Biological_Process	Up
GO:0035592	GO:0035592	establishment of protein localization to extracellular region	9/189	463/18866	0.0440303	0.14893	0.108426	ANG/RBP4/CD14/AFM/FGA/FGG/GPLD1/SAA1/FGB	9	geneontology_Biological_Process	Up
GO:0044272	GO:0044272	sulfur compound biosynthetic process	5/189	192/18866	0.0442628	0.149469	0.108818	CDO1/MAT1A/BHMT/CTH/GSTA1	5	geneontology_Biological_Process	Up
GO:0009914	GO:0009914	hormone transport	7/189	323/18866	0.0444792	0.149952	0.10917	RBP4/TTR/TFR2/FGA/FGG/GPLD1/FGB	7	geneontology_Biological_Process	Up
GO:0006165	GO:0006165	nucleoside diphosphate phosphorylation	4/189	133/18866	0.0449131	0.150622	0.109657	ALDOB/PFKFB1/FBP1/OGDHL	4	geneontology_Biological_Process	Up
GO:0006826	GO:0006826	iron ion transport	3/189	79/18866	0.0449727	0.150622	0.109657	HPX/HRG/TFR2	3	geneontology_Biological_Process	Up
GO:0030104	GO:0030104	water homeostasis	3/189	79/18866	0.0449727	0.150622	0.109657	CYP4A11/CYP4F2/AQP9	3	geneontology_Biological_Process	Up
GO:0042246	GO:0042246	tissue regeneration	3/189	79/18866	0.0449727	0.150622	0.109657	APOA5/PLG/IGFBP1	3	geneontology_Biological_Process	Up
GO:0030072	GO:0030072	peptide hormone secretion	6/189	257/18866	0.0451336	0.150639	0.10967	RBP4/TFR2/FGA/FGG/GPLD1/FGB	6	geneontology_Biological_Process	Up
GO:0010922	GO:0010922	positive regulation of phosphatase activity	2/189	34/18866	0.0454203	0.150639	0.10967	RGN/GPLD1	2	geneontology_Biological_Process	Up
GO:0042311	GO:0042311	vasodilation	2/189	34/18866	0.0454203	0.150639	0.10967	KNG1/CPS1	2	geneontology_Biological_Process	Up
GO:0042908	GO:0042908	xenobiotic transport	2/189	34/18866	0.0454203	0.150639	0.10967	SLC22A1/NR1I2	2	geneontology_Biological_Process	Up
GO:0043094	GO:0043094	cellular metabolic compound salvage	2/189	34/18866	0.0454203	0.150639	0.10967	BHMT/UPP2	2	geneontology_Biological_Process	Up
GO:0050715	GO:0050715	positive regulation of cytokine secretion	2/189	34/18866	0.0454203	0.150639	0.10967	CD14/SAA1	2	geneontology_Biological_Process	Up
GO:0030198	GO:0030198	extracellular matrix organization	8/189	395/18866	0.0459061	0.151893	0.110583	TTR/KLKB1/PLG/SERPINF2/FGA/TMPRSS6/FGG/FGB	8	geneontology_Biological_Process	Up
GO:0071333	GO:0071333	cellular response to glucose stimulus	4/189	134/18866	0.0459471	0.151893	0.110583	PCK1/PCK2/GPLD1/CYP7A1	4	geneontology_Biological_Process	Up
GO:0043062	GO:0043062	extracellular structure organization	8/189	396/18866	0.0464685	0.153369	0.111657	TTR/KLKB1/PLG/SERPINF2/FGA/TMPRSS6/FGG/FGB	8	geneontology_Biological_Process	Up
GO:0046939	GO:0046939	nucleotide phosphorylation	4/189	135/18866	0.0469944	0.154854	0.112739	ALDOB/PFKFB1/FBP1/OGDHL	4	geneontology_Biological_Process	Up
GO:0071692	GO:0071692	protein localization to extracellular region	9/189	470/18866	0.0476023	0.156331	0.113814	ANG/RBP4/CD14/AFM/FGA/FGG/GPLD1/SAA1/FGB	9	geneontology_Biological_Process	Up
GO:0006691	GO:0006691	leukotriene metabolic process	2/189	35/18866	0.0478629	0.156331	0.113814	CYP4A11/CYP4F2	2	geneontology_Biological_Process	Up
GO:0019362	GO:0019362	pyridine nucleotide metabolic process	2/189	35/18866	0.0478629	0.156331	0.113814	ASPDH/HAAO	2	geneontology_Biological_Process	Up
GO:0046496	GO:0046496	nicotinamide nucleotide metabolic process	2/189	35/18866	0.0478629	0.156331	0.113814	ASPDH/HAAO	2	geneontology_Biological_Process	Up
GO:0072525	GO:0072525	pyridine-containing compound biosynthetic process	2/189	35/18866	0.0478629	0.156331	0.113814	ASPDH/HAAO	2	geneontology_Biological_Process	Up
GO:0009135	GO:0009135	purine nucleoside diphosphate metabolic process	4/189	136/18866	0.0480549	0.156331	0.113814	ALDOB/PFKFB1/FBP1/OGDHL	4	geneontology_Biological_Process	Up
GO:0009179	GO:0009179	purine ribonucleoside diphosphate metabolic process	4/189	136/18866	0.0480549	0.156331	0.113814	ALDOB/PFKFB1/FBP1/OGDHL	4	geneontology_Biological_Process	Up
GO:0071331	GO:0071331	cellular response to hexose stimulus	4/189	136/18866	0.0480549	0.156331	0.113814	PCK1/PCK2/GPLD1/CYP7A1	4	geneontology_Biological_Process	Up
GO:0071326	GO:0071326	cellular response to monosaccharide stimulus	4/189	137/18866	0.0491286	0.15957	0.116172	PCK1/PCK2/GPLD1/CYP7A1	4	geneontology_Biological_Process	Up
GO:0022617	GO:0022617	extracellular matrix disassembly	3/189	82/18866	0.049297	0.159863	0.116385	KLKB1/PLG/TMPRSS6	3	geneontology_Biological_Process	Up
GO:0001580	GO:0001580	detection of chemical stimulus involved in sensory perception of bitter taste	2/189	36/18866	0.0503524	0.162769	0.118501	AZGP1/RTP3	2	geneontology_Biological_Process	Up
GO:0051955	GO:0051955	regulation of amino acid transport	2/189	36/18866	0.0503524	0.162769	0.118501	SLC38A3/ARG1	2	geneontology_Biological_Process	Up
GO:0002718	GO:0002718	regulation of cytokine production involved in immune response	3/189	83/18866	0.050782	0.163898	0.119323	APOA1/APOA2/ARG1	3	geneontology_Biological_Process	Up
GO:0016052	GO:0016052	carbohydrate catabolic process	5/189	200/18866	0.0511106	0.164181	0.119529	DCXR/ALDOB/PFKFB1/FBP1/OGDHL	5	geneontology_Biological_Process	Up
GO:1901654	GO:1901654	response to ketone	5/189	200/18866	0.0511106	0.164181	0.119529	PCK1/PCK2/ABCB4/CPS1/ARG1	5	geneontology_Biological_Process	Up
GO:2000377	GO:2000377	regulation of reactive oxygen species metabolic process	5/189	200/18866	0.0511106	0.164181	0.119529	HP/PON3/RGN/AGXT2/F2	5	geneontology_Biological_Process	Up
GO:0009185	GO:0009185	ribonucleoside diphosphate metabolic process	4/189	139/18866	0.0513156	0.16458	0.11982	ALDOB/PFKFB1/FBP1/OGDHL	4	geneontology_Biological_Process	Up
GO:0046209	GO:0046209	nitric oxide metabolic process	3/189	84/18866	0.0522887	0.167438	0.1219	RGN/AGXT2/CPS1	3	geneontology_Biological_Process	Up
GO:0046883	GO:0046883	regulation of hormone secretion	6/189	267/18866	0.0525143	0.167898	0.122235	RBP4/TFR2/FGA/FGG/GPLD1/FGB	6	geneontology_Biological_Process	Up
GO:0003091	GO:0003091	renal water homeostasis	2/189	37/18866	0.0528876	0.168301	0.122529	CYP4A11/CYP4F2	2	geneontology_Biological_Process	Up
GO:0030212	GO:0030212	hyaluronan metabolic process	2/189	37/18866	0.0528876	0.168301	0.122529	ITIH3/ITIH1	2	geneontology_Biological_Process	Up
GO:0090322	GO:0090322	regulation of superoxide metabolic process	2/189	37/18866	0.0528876	0.168301	0.122529	PON3/RGN	2	geneontology_Biological_Process	Up
GO:0060541	GO:0060541	respiratory system development	5/189	204/18866	0.0547548	0.173972	0.126657	RBP4/RIDA/ARG1/HSD11B1/CYP1A2	5	geneontology_Biological_Process	Up
GO:0006112	GO:0006112	energy reserve metabolic process	3/189	86/18866	0.0553662	0.174607	0.127119	GYS2/GNMT/GCGR	3	geneontology_Biological_Process	Up
GO:0034109	GO:0034109	homotypic cell-cell adhesion	3/189	86/18866	0.0553662	0.174607	0.127119	FGA/FGG/FGB	3	geneontology_Biological_Process	Up
GO:0097756	GO:0097756	negative regulation of blood vessel diameter	3/189	86/18866	0.0553662	0.174607	0.127119	FGA/FGG/FGB	3	geneontology_Biological_Process	Up
GO:0032094	GO:0032094	response to food	2/189	38/18866	0.0554674	0.174607	0.127119	LRCOL1/CPS1	2	geneontology_Biological_Process	Up
GO:0048009	GO:0048009	insulin-like growth factor receptor signaling pathway	2/189	38/18866	0.0554674	0.174607	0.127119	IGFBP2/IGFBP1	2	geneontology_Biological_Process	Up
GO:0071276	GO:0071276	cellular response to cadmium ion	2/189	38/18866	0.0554674	0.174607	0.127119	MT1X/CYP1A2	2	geneontology_Biological_Process	Up
GO:2001057	GO:2001057	reactive nitrogen species metabolic process	3/189	87/18866	0.0569368	0.178813	0.130182	RGN/AGXT2/CPS1	3	geneontology_Biological_Process	Up
GO:0046434	GO:0046434	organophosphate catabolic process	4/189	144/18866	0.0570129	0.178813	0.130182	APOC1/PON1/APOA2/UPP2	4	geneontology_Biological_Process	Up
GO:0043312	GO:0043312	neutrophil degranulation	9/189	487/18866	0.0570662	0.178813	0.130182	HP/CD14/TTR/A1BG/ORM2/SLC27A2/ORM1/ARG1/AHSG	9	geneontology_Biological_Process	Up
GO:0071322	GO:0071322	cellular response to carbohydrate stimulus	4/189	145/18866	0.0581916	0.18206	0.132546	PCK1/PCK2/GPLD1/CYP7A1	4	geneontology_Biological_Process	Up
GO:0008625	GO:0008625	extrinsic apoptotic signaling pathway via death domain receptors	3/189	89/18866	0.060141	0.187872	0.136777	FGA/FGG/FGB	3	geneontology_Biological_Process	Up
GO:0030100	GO:0030100	regulation of endocytosis	5/189	210/18866	0.060497	0.188691	0.137373	APOC1/APOC3/CD14/APOA5/TFR2	5	geneontology_Biological_Process	Up
GO:0051592	GO:0051592	response to calcium ion	4/189	147/18866	0.060588	0.188691	0.137373	FGA/FGG/GPLD1/FGB	4	geneontology_Biological_Process	Up
GO:0008207	GO:0008207	C21-steroid hormone metabolic process	2/189	40/18866	0.060756	0.188926	0.137544	CYP11A1/AKR1C4	2	geneontology_Biological_Process	Up
GO:0022409	GO:0022409	positive regulation of cell-cell adhesion	6/189	279/18866	0.0622908	0.193404	0.140804	PCK1/SERPINF2/FGA/FGG/FGB/IGFBP2	6	geneontology_Biological_Process	Up
GO:0045921	GO:0045921	positive regulation of exocytosis	3/189	91/18866	0.0634281	0.195262	0.142157	FGA/FGG/FGB	3	geneontology_Biological_Process	Up
GO:0050832	GO:0050832	defense response to fungus	2/189	41/18866	0.0634627	0.195262	0.142157	HRG/ARG1	2	geneontology_Biological_Process	Up
GO:0050913	GO:0050913	sensory perception of bitter taste	2/189	41/18866	0.0634627	0.195262	0.142157	AZGP1/RTP3	2	geneontology_Biological_Process	Up
GO:0051180	GO:0051180	vitamin transport	2/189	41/18866	0.0634627	0.195262	0.142157	AFM/APOA1	2	geneontology_Biological_Process	Up
GO:0072524	GO:0072524	pyridine-containing compound metabolic process	2/189	41/18866	0.0634627	0.195262	0.142157	ASPDH/HAAO	2	geneontology_Biological_Process	Up
GO:0072528	GO:0072528	pyrimidine-containing compound biosynthetic process	2/189	41/18866	0.0634627	0.195262	0.142157	CPS1/UPP2	2	geneontology_Biological_Process	Up
GO:0031341	GO:0031341	regulation of cell killing	3/189	92/18866	0.0651024	0.200006	0.145611	AZGP1/DNASE1L3/ARG1	3	geneontology_Biological_Process	Up
GO:0046006	GO:0046006	regulation of activated T cell proliferation	2/189	42/18866	0.0662094	0.202797	0.147643	IGFBP2/ARG1	2	geneontology_Biological_Process	Up
GO:0050912	GO:0050912	detection of chemical stimulus involved in sensory perception of taste	2/189	42/18866	0.0662094	0.202797	0.147643	AZGP1/RTP3	2	geneontology_Biological_Process	Up
GO:0002224	GO:0002224	toll-like receptor signaling pathway	4/189	152/18866	0.0668047	0.204315	0.148747	CD14/FGA/FGG/FGB	4	geneontology_Biological_Process	Up
GO:0001678	GO:0001678	cellular glucose homeostasis	4/189	153/18866	0.0680865	0.207923	0.151375	PCK1/PCK2/GPLD1/CYP7A1	4	geneontology_Biological_Process	Up
GO:1901264	GO:1901264	carbohydrate derivative transport	3/189	94/18866	0.0685115	0.208909	0.152092	SLC25A47/MFSD2A/SLC28A1	3	geneontology_Biological_Process	Up
GO:0006308	GO:0006308	DNA catabolic process	2/189	43/18866	0.0689952	0.209758	0.15271	RGN/DNASE1L3	2	geneontology_Biological_Process	Up
GO:0046688	GO:0046688	response to copper ion	2/189	43/18866	0.0689952	0.209758	0.15271	MT1X/CYP1A2	2	geneontology_Biological_Process	Up
GO:0003073	GO:0003073	regulation of systemic arterial blood pressure	3/189	95/18866	0.070246	0.213243	0.155248	CYP4A11/CYP4F2/SERPINF2	3	geneontology_Biological_Process	Up
GO:0009132	GO:0009132	nucleoside diphosphate metabolic process	4/189	155/18866	0.0706882	0.214267	0.155993	ALDOB/PFKFB1/FBP1/OGDHL	4	geneontology_Biological_Process	Up
GO:0032965	GO:0032965	regulation of collagen biosynthetic process	2/189	44/18866	0.071819	0.216917	0.157922	SERPINF2/F2	2	geneontology_Biological_Process	Up
GO:0120009	GO:0120009	intermembrane lipid transfer	2/189	44/18866	0.071819	0.216917	0.157922	APOA1/APOA2	2	geneontology_Biological_Process	Up
GO:0031669	GO:0031669	cellular response to nutrient levels	5/189	221/18866	0.0718808	0.216917	0.157922	PCK1/GCGR/SLC38A3/MFSD2A/ALB	5	geneontology_Biological_Process	Up
GO:0010770	GO:0010770	positive regulation of cell morphogenesis involved in differentiation	4/189	157/18866	0.0733403	0.220994	0.160891	APOA1/FGA/FGG/FGB	4	geneontology_Biological_Process	Up
GO:0032651	GO:0032651	regulation of interleukin-1 beta production	3/189	97/18866	0.073774	0.221647	0.161366	APOA1/ORM2/ORM1	3	geneontology_Biological_Process	Up
GO:1901655	GO:1901655	cellular response to ketone	3/189	97/18866	0.073774	0.221647	0.161366	PCK1/PCK2/ARG1	3	geneontology_Biological_Process	Up
GO:0002639	GO:0002639	positive regulation of immunoglobulin production	2/189	45/18866	0.0746798	0.223399	0.162642	RBP4/HPX	2	geneontology_Biological_Process	Up
GO:0010677	GO:0010677	negative regulation of cellular carbohydrate metabolic process	2/189	45/18866	0.0746798	0.223399	0.162642	PFKFB1/FBP1	2	geneontology_Biological_Process	Up
GO:0050729	GO:0050729	positive regulation of inflammatory response	4/189	158/18866	0.0746852	0.223399	0.162642	F12/KLKB1/FABP4/PLA2G2A	4	geneontology_Biological_Process	Up
GO:0042158	GO:0042158	lipoprotein biosynthetic process	3/189	98/18866	0.0755672	0.225378	0.164082	LCAT/APOA1/GPLD1	3	geneontology_Biological_Process	Up
GO:0050810	GO:0050810	regulation of steroid biosynthetic process	3/189	98/18866	0.0755672	0.225378	0.164082	SEC14L2/INSIG1/CYP7A1	3	geneontology_Biological_Process	Up
GO:0015837	GO:0015837	amine transport	3/189	99/18866	0.0773796	0.230027	0.167467	AQP9/SLC38A3/ARG1	3	geneontology_Biological_Process	Up
GO:0043255	GO:0043255	regulation of carbohydrate biosynthetic process	3/189	99/18866	0.0773796	0.230027	0.167467	GNMT/FBP1/GPT	3	geneontology_Biological_Process	Up
GO:0010874	GO:0010874	regulation of cholesterol efflux	2/189	46/18866	0.0775765	0.230027	0.167467	PON1/APOA1	2	geneontology_Biological_Process	Up
GO:0050798	GO:0050798	activated T cell proliferation	2/189	46/18866	0.0775765	0.230027	0.167467	IGFBP2/ARG1	2	geneontology_Biological_Process	Up
GO:0006605	GO:0006605	protein targeting	8/189	444/18866	0.0789095	0.233641	0.170098	AGXT/HAO1/RTP3/DAO/PIPOX/SLC27A2/BAAT/HAO2	8	geneontology_Biological_Process	Up
GO:0045807	GO:0045807	positive regulation of endocytosis	3/189	100/18866	0.0792111	0.234194	0.170501	CD14/APOA5/TFR2	3	geneontology_Biological_Process	Up
GO:0014075	GO:0014075	response to amine	2/189	47/18866	0.0805081	0.237685	0.173042	CPS1/ARG1	2	geneontology_Biological_Process	Up
GO:0044264	GO:0044264	cellular polysaccharide metabolic process	3/189	101/18866	0.0810614	0.238973	0.17398	GYS2/GNMT/GCGR	3	geneontology_Biological_Process	Up
GO:0007162	GO:0007162	negative regulation of cell adhesion	6/189	301/18866	0.0828338	0.243847	0.177528	HRG/KNG1/APOA1/PLG/FGG/ARG1	6	geneontology_Biological_Process	Up
GO:0051259	GO:0051259	protein complex oligomerization	5/189	231/18866	0.0831805	0.244515	0.178014	GNMT/MAT1A/UPB1/CTH/C9	5	geneontology_Biological_Process	Up
GO:0090501	GO:0090501	RNA phosphodiester bond hydrolysis	4/189	165/18866	0.0844455	0.247877	0.180462	RNASE4/ANG/RIDA/AZGP1	4	geneontology_Biological_Process	Up
GO:0007595	GO:0007595	lactation	2/189	49/18866	0.0864724	0.252016	0.183475	SERPINC1/CDO1	2	geneontology_Biological_Process	Up
GO:0009395	GO:0009395	phospholipid catabolic process	2/189	49/18866	0.0864724	0.252016	0.183475	APOC1/APOA2	2	geneontology_Biological_Process	Up
GO:0010712	GO:0010712	regulation of collagen metabolic process	2/189	49/18866	0.0864724	0.252016	0.183475	SERPINF2/F2	2	geneontology_Biological_Process	Up
GO:0015695	GO:0015695	organic cation transport	2/189	49/18866	0.0864724	0.252016	0.183475	SLC22A1/SLC25A47	2	geneontology_Biological_Process	Up
GO:0120178	GO:0120178	steroid hormone biosynthetic process	2/189	49/18866	0.0864724	0.252016	0.183475	HSD17B6/CYP11A1	2	geneontology_Biological_Process	Up
GO:0002367	GO:0002367	cytokine production involved in immune response	3/189	104/18866	0.0867236	0.252029	0.183485	APOA1/APOA2/ARG1	3	geneontology_Biological_Process	Up
GO:0032649	GO:0032649	regulation of interferon-gamma production	3/189	104/18866	0.0867236	0.252029	0.183485	CD14/IL27/PGLYRP2	3	geneontology_Biological_Process	Up
GO:0000302	GO:0000302	response to reactive oxygen species	5/189	235/18866	0.0879496	0.254932	0.185599	HP/RGN/FABP1/ARG1/CYP2E1	5	geneontology_Biological_Process	Up
GO:0070372	GO:0070372	regulation of ERK1 and ERK2 cascade	6/189	306/18866	0.0879723	0.254932	0.185599	CCL16/SERPINF2/FGA/FGG/FGB/PLA2G2A	6	geneontology_Biological_Process	Up
GO:0048259	GO:0048259	regulation of receptor-mediated endocytosis	3/189	105/18866	0.0886475	0.256525	0.186758	APOC1/APOC3/APOA5	3	geneontology_Biological_Process	Up
GO:0045540	GO:0045540	regulation of cholesterol biosynthetic process	2/189	50/18866	0.089503	0.257542	0.187499	SEC14L2/CYP7A1	2	geneontology_Biological_Process	Up
GO:0045806	GO:0045806	negative regulation of endocytosis	2/189	50/18866	0.089503	0.257542	0.187499	APOC1/APOC3	2	geneontology_Biological_Process	Up
GO:0050873	GO:0050873	brown fat cell differentiation	2/189	50/18866	0.089503	0.257542	0.187499	FABP4/FNDC5	2	geneontology_Biological_Process	Up
GO:0106118	GO:0106118	regulation of sterol biosynthetic process	2/189	50/18866	0.089503	0.257542	0.187499	SEC14L2/CYP7A1	2	geneontology_Biological_Process	Up
GO:0051100	GO:0051100	negative regulation of binding	4/189	169/18866	0.0902899	0.259207	0.188711	CFHR2/CYP2D6/CFHR1/CFHR5	4	geneontology_Biological_Process	Up
GO:0032091	GO:0032091	negative regulation of protein binding	3/189	106/18866	0.0905892	0.259207	0.188711	CFHR2/CFHR1/CFHR5	3	geneontology_Biological_Process	Up
GO:0032611	GO:0032611	interleukin-1 beta production	3/189	106/18866	0.0905892	0.259207	0.188711	APOA1/ORM2/ORM1	3	geneontology_Biological_Process	Up
GO:2000379	GO:2000379	positive regulation of reactive oxygen species metabolic process	3/189	106/18866	0.0905892	0.259207	0.188711	RGN/AGXT2/F2	3	geneontology_Biological_Process	Up
GO:2001237	GO:2001237	negative regulation of extrinsic apoptotic signaling pathway	3/189	107/18866	0.0925487	0.259587	0.188987	FGA/FGG/FGB	3	geneontology_Biological_Process	Up
GO:0006984	GO:0006984	ER-nucleus signaling pathway	2/189	51/18866	0.0925648	0.259587	0.188987	INSIG1/IGFBP1	2	geneontology_Biological_Process	Up
GO:0045912	GO:0045912	negative regulation of carbohydrate metabolic process	2/189	51/18866	0.0925648	0.259587	0.188987	PFKFB1/FBP1	2	geneontology_Biological_Process	Up
GO:0009306	GO:0009306	protein secretion	8/189	462/18866	0.0938773	0.259587	0.188987	ANG/RBP4/CD14/FGA/FGG/GPLD1/SAA1/FGB	8	geneontology_Biological_Process	Up
GO:0032526	GO:0032526	response to retinoic acid	3/189	108/18866	0.0945258	0.259587	0.188987	RBP4/PCK1/IGFBP2	3	geneontology_Biological_Process	Up
GO:0001912	GO:0001912	positive regulation of leukocyte mediated cytotoxicity	2/189	52/18866	0.0956568	0.259587	0.188987	AZGP1/ARG1	2	geneontology_Biological_Process	Up
GO:0030514	GO:0030514	negative regulation of BMP signaling pathway	2/189	52/18866	0.0956568	0.259587	0.188987	HJV/TMPRSS6	2	geneontology_Biological_Process	Up
GO:0051496	GO:0051496	positive regulation of stress fiber assembly	2/189	52/18866	0.0956568	0.259587	0.188987	APOA1/SERPINF2	2	geneontology_Biological_Process	Up
GO:0055078	GO:0055078	sodium ion homeostasis	2/189	52/18866	0.0956568	0.259587	0.188987	CYP4A11/CYP4F2	2	geneontology_Biological_Process	Up
GO:0006222	GO:0006222	UMP biosynthetic process	1/189	10/18866	0.0958044	0.259587	0.188987	UPP2	1	geneontology_Biological_Process	Up
GO:0006560	GO:0006560	proline metabolic process	1/189	10/18866	0.0958044	0.259587	0.188987	DAO	1	geneontology_Biological_Process	Up
GO:0006569	GO:0006569	tryptophan catabolic process	1/189	10/18866	0.0958044	0.259587	0.188987	HAAO	1	geneontology_Biological_Process	Up
GO:0009173	GO:0009173	pyrimidine ribonucleoside monophosphate metabolic process	1/189	10/18866	0.0958044	0.259587	0.188987	UPP2	1	geneontology_Biological_Process	Up
GO:0009174	GO:0009174	pyrimidine ribonucleoside monophosphate biosynthetic process	1/189	10/18866	0.0958044	0.259587	0.188987	UPP2	1	geneontology_Biological_Process	Up
GO:0010269	GO:0010269	response to selenium ion	1/189	10/18866	0.0958044	0.259587	0.188987	ARG1	1	geneontology_Biological_Process	Up
GO:0010986	GO:0010986	positive regulation of lipoprotein particle clearance	1/189	10/18866	0.0958044	0.259587	0.188987	GPLD1	1	geneontology_Biological_Process	Up
GO:0015808	GO:0015808	L-alanine transport	1/189	10/18866	0.0958044	0.259587	0.188987	SLC38A3	1	geneontology_Biological_Process	Up
GO:0015893	GO:0015893	drug transport	1/189	10/18866	0.0958044	0.259587	0.188987	SLC22A1	1	geneontology_Biological_Process	Up
GO:0030647	GO:0030647	aminoglycoside antibiotic metabolic process	1/189	10/18866	0.0958044	0.259587	0.188987	AKR1C4	1	geneontology_Biological_Process	Up
GO:0032000	GO:0032000	positive regulation of fatty acid beta-oxidation	1/189	10/18866	0.0958044	0.259587	0.188987	FABP1	1	geneontology_Biological_Process	Up
GO:0032815	GO:0032815	negative regulation of natural killer cell activation	1/189	10/18866	0.0958044	0.259587	0.188987	PGLYRP2	1	geneontology_Biological_Process	Up
GO:0033131	GO:0033131	regulation of glucokinase activity	1/189	10/18866	0.0958044	0.259587	0.188987	PFKFB1	1	geneontology_Biological_Process	Up
GO:0035999	GO:0035999	tetrahydrofolate interconversion	1/189	10/18866	0.0958044	0.259587	0.188987	FTCD	1	geneontology_Biological_Process	Up
GO:0042436	GO:0042436	indole-containing compound catabolic process	1/189	10/18866	0.0958044	0.259587	0.188987	HAAO	1	geneontology_Biological_Process	Up
GO:0043380	GO:0043380	regulation of memory T cell differentiation	1/189	10/18866	0.0958044	0.259587	0.188987	PCK1	1	geneontology_Biological_Process	Up
GO:0045625	GO:0045625	regulation of T-helper 1 cell differentiation	1/189	10/18866	0.0958044	0.259587	0.188987	IL27	1	geneontology_Biological_Process	Up
GO:0046049	GO:0046049	UMP metabolic process	1/189	10/18866	0.0958044	0.259587	0.188987	UPP2	1	geneontology_Biological_Process	Up
GO:0046218	GO:0046218	indolalkylamine catabolic process	1/189	10/18866	0.0958044	0.259587	0.188987	HAAO	1	geneontology_Biological_Process	Up
GO:0051342	GO:0051342	regulation of cyclic-nucleotide phosphodiesterase activity	1/189	10/18866	0.0958044	0.259587	0.188987	RGN	1	geneontology_Biological_Process	Up
GO:0060068	GO:0060068	vagina development	1/189	10/18866	0.0958044	0.259587	0.188987	RBP4	1	geneontology_Biological_Process	Up
GO:0070314	GO:0070314	G1 to G0 transition	1/189	10/18866	0.0958044	0.259587	0.188987	RIDA	1	geneontology_Biological_Process	Up
GO:0070327	GO:0070327	thyroid hormone transport	1/189	10/18866	0.0958044	0.259587	0.188987	TTR	1	geneontology_Biological_Process	Up
GO:0070391	GO:0070391	response to lipoteichoic acid	1/189	10/18866	0.0958044	0.259587	0.188987	CD14	1	geneontology_Biological_Process	Up
GO:0070862	GO:0070862	negative regulation of protein exit from endoplasmic reticulum	1/189	10/18866	0.0958044	0.259587	0.188987	INSIG1	1	geneontology_Biological_Process	Up
GO:0071223	GO:0071223	cellular response to lipoteichoic acid	1/189	10/18866	0.0958044	0.259587	0.188987	CD14	1	geneontology_Biological_Process	Up
GO:0110096	GO:0110096	cellular response to aldehyde	1/189	10/18866	0.0958044	0.259587	0.188987	ADH4	1	geneontology_Biological_Process	Up
GO:0120252	GO:0120252	hydrocarbon metabolic process	1/189	10/18866	0.0958044	0.259587	0.188987	CYP2E1	1	geneontology_Biological_Process	Up
GO:1901894	GO:1901894	regulation of ATPase-coupled calcium transmembrane transporter activity	1/189	10/18866	0.0958044	0.259587	0.188987	RGN	1	geneontology_Biological_Process	Up
GO:1902023	GO:1902023	L-arginine transport	1/189	10/18866	0.0958044	0.259587	0.188987	ARG1	1	geneontology_Biological_Process	Up
GO:2000048	GO:2000048	negative regulation of cell-cell adhesion mediated by cadherin	1/189	10/18866	0.0958044	0.259587	0.188987	PLG	1	geneontology_Biological_Process	Up
GO:0046879	GO:0046879	hormone secretion	6/189	314/18866	0.0965498	0.26126	0.190205	RBP4/TFR2/FGA/FGG/GPLD1/FGB	6	geneontology_Biological_Process	Up
GO:0098656	GO:0098656	anion transmembrane transport	6/189	315/18866	0.0976525	0.263894	0.192123	SLC27A5/SLC13A5/AQP9/SLC38A3/FXYD1/THRSP	6	geneontology_Biological_Process	Up
GO:0031331	GO:0031331	positive regulation of cellular catabolic process	7/189	390/18866	0.0979865	0.264447	0.192526	RIDA/PFKFB1/APOA5/RGN/APOA1/GPLD1/FABP1	7	geneontology_Biological_Process	Up
GO:0032731	GO:0032731	positive regulation of interleukin-1 beta production	2/189	53/18866	0.0987781	0.266232	0.193825	ORM2/ORM1	2	geneontology_Biological_Process	Up
GO:0009620	GO:0009620	response to fungus	2/189	54/18866	0.101928	0.269422	0.196148	HRG/ARG1	2	geneontology_Biological_Process	Up
GO:0032757	GO:0032757	positive regulation of interleukin-8 production	2/189	54/18866	0.101928	0.269422	0.196148	CD14/APOA2	2	geneontology_Biological_Process	Up
GO:0005976	GO:0005976	polysaccharide metabolic process	3/189	112/18866	0.102605	0.269422	0.196148	GYS2/GNMT/GCGR	3	geneontology_Biological_Process	Up
GO:0048771	GO:0048771	tissue remodeling	4/189	178/18866	0.104125	0.269422	0.196148	HRG/SPP2/PLG/ARG1	4	geneontology_Biological_Process	Up
GO:0005984	GO:0005984	disaccharide metabolic process	1/189	11/18866	0.104867	0.269422	0.196148	FBP1	1	geneontology_Biological_Process	Up
GO:0006527	GO:0006527	arginine catabolic process	1/189	11/18866	0.104867	0.269422	0.196148	ARG1	1	geneontology_Biological_Process	Up
GO:0006702	GO:0006702	androgen biosynthetic process	1/189	11/18866	0.104867	0.269422	0.196148	HSD17B6	1	geneontology_Biological_Process	Up
GO:0006707	GO:0006707	cholesterol catabolic process	1/189	11/18866	0.104867	0.269422	0.196148	CYP7A1	1	geneontology_Biological_Process	Up
GO:0006853	GO:0006853	carnitine shuttle	1/189	11/18866	0.104867	0.269422	0.196148	THRSP	1	geneontology_Biological_Process	Up
GO:0008655	GO:0008655	pyrimidine-containing compound salvage	1/189	11/18866	0.104867	0.269422	0.196148	UPP2	1	geneontology_Biological_Process	Up
GO:0016127	GO:0016127	sterol catabolic process	1/189	11/18866	0.104867	0.269422	0.196148	CYP7A1	1	geneontology_Biological_Process	Up
GO:0019532	GO:0019532	oxalate transport	1/189	11/18866	0.104867	0.269422	0.196148	AGXT	1	geneontology_Biological_Process	Up
GO:0019852	GO:0019852	L-ascorbic acid metabolic process	1/189	11/18866	0.104867	0.269422	0.196148	RGN	1	geneontology_Biological_Process	Up
GO:0033197	GO:0033197	response to vitamin E	1/189	11/18866	0.104867	0.269422	0.196148	ARG1	1	geneontology_Biological_Process	Up
GO:0034115	GO:0034115	negative regulation of heterotypic cell-cell adhesion	1/189	11/18866	0.104867	0.269422	0.196148	APOA1	1	geneontology_Biological_Process	Up
GO:0034650	GO:0034650	cortisol metabolic process	1/189	11/18866	0.104867	0.269422	0.196148	CYP11A1	1	geneontology_Biological_Process	Up
GO:0042447	GO:0042447	hormone catabolic process	1/189	11/18866	0.104867	0.269422	0.196148	HSD17B6	1	geneontology_Biological_Process	Up
GO:0043097	GO:0043097	pyrimidine nucleoside salvage	1/189	11/18866	0.104867	0.269422	0.196148	UPP2	1	geneontology_Biological_Process	Up
GO:0043379	GO:0043379	memory T cell differentiation	1/189	11/18866	0.104867	0.269422	0.196148	PCK1	1	geneontology_Biological_Process	Up
GO:0051024	GO:0051024	positive regulation of immunoglobulin secretion	1/189	11/18866	0.104867	0.269422	0.196148	RBP4	1	geneontology_Biological_Process	Up
GO:0051610	GO:0051610	serotonin uptake	1/189	11/18866	0.104867	0.269422	0.196148	SLC22A1	1	geneontology_Biological_Process	Up
GO:0051712	GO:0051712	positive regulation of killing of cells of other organism	1/189	11/18866	0.104867	0.269422	0.196148	ARG1	1	geneontology_Biological_Process	Up
GO:0060354	GO:0060354	negative regulation of cell adhesion molecule production	1/189	11/18866	0.104867	0.269422	0.196148	APOA1	1	geneontology_Biological_Process	Up
GO:0070106	GO:0070106	interleukin-27-mediated signaling pathway	1/189	11/18866	0.104867	0.269422	0.196148	IL27	1	geneontology_Biological_Process	Up
GO:0070189	GO:0070189	kynurenine metabolic process	1/189	11/18866	0.104867	0.269422	0.196148	ALDH8A1	1	geneontology_Biological_Process	Up
GO:0070339	GO:0070339	response to bacterial lipopeptide	1/189	11/18866	0.104867	0.269422	0.196148	CD14	1	geneontology_Biological_Process	Up
GO:0070587	GO:0070587	regulation of cell-cell adhesion involved in gastrulation	1/189	11/18866	0.104867	0.269422	0.196148	APOA1	1	geneontology_Biological_Process	Up
GO:0071220	GO:0071220	cellular response to bacterial lipoprotein	1/189	11/18866	0.104867	0.269422	0.196148	CD14	1	geneontology_Biological_Process	Up
GO:0071221	GO:0071221	cellular response to bacterial lipopeptide	1/189	11/18866	0.104867	0.269422	0.196148	CD14	1	geneontology_Biological_Process	Up
GO:0071281	GO:0071281	cellular response to iron ion	1/189	11/18866	0.104867	0.269422	0.196148	TFR2	1	geneontology_Biological_Process	Up
GO:0090205	GO:0090205	positive regulation of cholesterol metabolic process	1/189	11/18866	0.104867	0.269422	0.196148	CYP7A1	1	geneontology_Biological_Process	Up
GO:0090715	GO:0090715	immunological memory formation process	1/189	11/18866	0.104867	0.269422	0.196148	PCK1	1	geneontology_Biological_Process	Up
GO:1901033	GO:1901033	positive regulation of response to reactive oxygen species	1/189	11/18866	0.104867	0.269422	0.196148	RGN	1	geneontology_Biological_Process	Up
GO:1903011	GO:1903011	negative regulation of bone development	1/189	11/18866	0.104867	0.269422	0.196148	RGN	1	geneontology_Biological_Process	Up
GO:1903299	GO:1903299	regulation of hexokinase activity	1/189	11/18866	0.104867	0.269422	0.196148	PFKFB1	1	geneontology_Biological_Process	Up
GO:2000049	GO:2000049	positive regulation of cell-cell adhesion mediated by cadherin	1/189	11/18866	0.104867	0.269422	0.196148	SERPINF2	1	geneontology_Biological_Process	Up
GO:2000551	GO:2000551	regulation of T-helper 2 cell cytokine production	1/189	11/18866	0.104867	0.269422	0.196148	ARG1	1	geneontology_Biological_Process	Up
GO:0032781	GO:0032781	positive regulation of ATPase activity	2/189	55/18866	0.105105	0.269422	0.196148	ALDOB/RGN	2	geneontology_Biological_Process	Up
GO:0070741	GO:0070741	response to interleukin-6	2/189	55/18866	0.105105	0.269422	0.196148	PCK1/FGG	2	geneontology_Biological_Process	Up
GO:0070371	GO:0070371	ERK1 and ERK2 cascade	6/189	325/18866	0.109047	0.279177	0.203249	CCL16/SERPINF2/FGA/FGG/FGB/PLA2G2A	6	geneontology_Biological_Process	Up
GO:0032640	GO:0032640	tumor necrosis factor production	3/189	116/18866	0.110949	0.282595	0.205738	CD14/ZG16/ORM1	3	geneontology_Biological_Process	Up
GO:0031668	GO:0031668	cellular response to extracellular stimulus	5/189	253/18866	0.111118	0.282595	0.205738	PCK1/GCGR/SLC38A3/MFSD2A/ALB	5	geneontology_Biological_Process	Up
GO:0006576	GO:0006576	cellular biogenic amine metabolic process	2/189	57/18866	0.111538	0.282595	0.205738	HAAO/BHMT	2	geneontology_Biological_Process	Up
GO:0042743	GO:0042743	hydrogen peroxide metabolic process	2/189	57/18866	0.111538	0.282595	0.205738	HP/CYP1A2	2	geneontology_Biological_Process	Up
GO:0071347	GO:0071347	cellular response to interleukin-1	4/189	183/18866	0.112207	0.282595	0.205738	PCK1/CCL16/FGG/FGB	4	geneontology_Biological_Process	Up
GO:0000185	GO:0000185	activation of MAPKKK activity	1/189	12/18866	0.11384	0.282595	0.205738	GADD45G	1	geneontology_Biological_Process	Up
GO:0001867	GO:0001867	complement activation, lectin pathway	1/189	12/18866	0.11384	0.282595	0.205738	MASP2	1	geneontology_Biological_Process	Up
GO:0006002	GO:0006002	fructose 6-phosphate metabolic process	1/189	12/18866	0.11384	0.282595	0.205738	FBP1	1	geneontology_Biological_Process	Up
GO:0006554	GO:0006554	lysine catabolic process	1/189	12/18866	0.11384	0.282595	0.205738	PIPOX	1	geneontology_Biological_Process	Up
GO:0006563	GO:0006563	L-serine metabolic process	1/189	12/18866	0.11384	0.282595	0.205738	SDS	1	geneontology_Biological_Process	Up
GO:0006568	GO:0006568	tryptophan metabolic process	1/189	12/18866	0.11384	0.282595	0.205738	HAAO	1	geneontology_Biological_Process	Up
GO:0009086	GO:0009086	methionine biosynthetic process	1/189	12/18866	0.11384	0.282595	0.205738	BHMT	1	geneontology_Biological_Process	Up
GO:0033629	GO:0033629	negative regulation of cell adhesion mediated by integrin	1/189	12/18866	0.11384	0.282595	0.205738	HRG	1	geneontology_Biological_Process	Up
GO:0035845	GO:0035845	photoreceptor cell outer segment organization	1/189	12/18866	0.11384	0.282595	0.205738	MFSD2A	1	geneontology_Biological_Process	Up
GO:0042178	GO:0042178	xenobiotic catabolic process	1/189	12/18866	0.11384	0.282595	0.205738	PON3	1	geneontology_Biological_Process	Up
GO:0042363	GO:0042363	fat-soluble vitamin catabolic process	1/189	12/18866	0.11384	0.282595	0.205738	CYP4F2	1	geneontology_Biological_Process	Up
GO:0042368	GO:0042368	vitamin D biosynthetic process	1/189	12/18866	0.11384	0.282595	0.205738	CYP3A4	1	geneontology_Biological_Process	Up
GO:0042416	GO:0042416	dopamine biosynthetic process	1/189	12/18866	0.11384	0.282595	0.205738	DAO	1	geneontology_Biological_Process	Up
GO:0046322	GO:0046322	negative regulation of fatty acid oxidation	1/189	12/18866	0.11384	0.282595	0.205738	MFSD2A	1	geneontology_Biological_Process	Up
GO:0051340	GO:0051340	regulation of ligase activity	1/189	12/18866	0.11384	0.282595	0.205738	RGN	1	geneontology_Biological_Process	Up
GO:0051657	GO:0051657	maintenance of organelle location	1/189	12/18866	0.11384	0.282595	0.205738	ALB	1	geneontology_Biological_Process	Up
GO:0060856	GO:0060856	establishment of blood-brain barrier	1/189	12/18866	0.11384	0.282595	0.205738	MFSD2A	1	geneontology_Biological_Process	Up
GO:0070586	GO:0070586	cell-cell adhesion involved in gastrulation	1/189	12/18866	0.11384	0.282595	0.205738	APOA1	1	geneontology_Biological_Process	Up
GO:0070857	GO:0070857	regulation of bile acid biosynthetic process	1/189	12/18866	0.11384	0.282595	0.205738	CYP7A1	1	geneontology_Biological_Process	Up
GO:0090331	GO:0090331	negative regulation of platelet aggregation	1/189	12/18866	0.11384	0.282595	0.205738	FGG	1	geneontology_Biological_Process	Up
GO:0002886	GO:0002886	regulation of myeloid leukocyte mediated immunity	2/189	58/18866	0.114793	0.28427	0.206957	DNASE1L3/ARG1	2	geneontology_Biological_Process	Up
GO:0035306	GO:0035306	positive regulation of dephosphorylation	2/189	58/18866	0.114793	0.28427	0.206957	RGN/GPLD1	2	geneontology_Biological_Process	Up
GO:0071706	GO:0071706	tumor necrosis factor superfamily cytokine production	3/189	119/18866	0.117373	0.290306	0.211352	CD14/ZG16/ORM1	3	geneontology_Biological_Process	Up
GO:0050707	GO:0050707	regulation of cytokine secretion	2/189	59/18866	0.118072	0.291682	0.212354	CD14/SAA1	2	geneontology_Biological_Process	Up
GO:0008217	GO:0008217	regulation of blood pressure	4/189	187/18866	0.118867	0.293291	0.213525	CYP4A11/CYP4F2/GCGR/SERPINF2	4	geneontology_Biological_Process	Up
GO:0060042	GO:0060042	retina morphogenesis in camera-type eye	2/189	60/18866	0.121374	0.295665	0.215253	RBP4/MFSD2A	2	geneontology_Biological_Process	Up
GO:0097755	GO:0097755	positive regulation of blood vessel diameter	2/189	60/18866	0.121374	0.295665	0.215253	KNG1/CPS1	2	geneontology_Biological_Process	Up
GO:0002430	GO:0002430	complement receptor mediated signaling pathway	1/189	13/18866	0.122723	0.295665	0.215253	GPLD1	1	geneontology_Biological_Process	Up
GO:0002836	GO:0002836	positive regulation of response to tumor cell	1/189	13/18866	0.122723	0.295665	0.215253	HRG	1	geneontology_Biological_Process	Up
GO:0002839	GO:0002839	positive regulation of immune response to tumor cell	1/189	13/18866	0.122723	0.295665	0.215253	HRG	1	geneontology_Biological_Process	Up
GO:0006068	GO:0006068	ethanol catabolic process	1/189	13/18866	0.122723	0.295665	0.215253	SULT2A1	1	geneontology_Biological_Process	Up
GO:0006553	GO:0006553	lysine metabolic process	1/189	13/18866	0.122723	0.295665	0.215253	PIPOX	1	geneontology_Biological_Process	Up
GO:0010623	GO:0010623	programmed cell death involved in cell development	1/189	13/18866	0.122723	0.295665	0.215253	DNASE1L3	1	geneontology_Biological_Process	Up
GO:0015791	GO:0015791	polyol transport	1/189	13/18866	0.122723	0.295665	0.215253	AQP9	1	geneontology_Biological_Process	Up
GO:0015801	GO:0015801	aromatic amino acid transport	1/189	13/18866	0.122723	0.295665	0.215253	SLC38A3	1	geneontology_Biological_Process	Up
GO:0015809	GO:0015809	arginine transport	1/189	13/18866	0.122723	0.295665	0.215253	ARG1	1	geneontology_Biological_Process	Up
GO:0019755	GO:0019755	one-carbon compound transport	1/189	13/18866	0.122723	0.295665	0.215253	AQP9	1	geneontology_Biological_Process	Up
GO:0032429	GO:0032429	regulation of phospholipase A2 activity	1/189	13/18866	0.122723	0.295665	0.215253	ANG	1	geneontology_Biological_Process	Up
GO:0032493	GO:0032493	response to bacterial lipoprotein	1/189	13/18866	0.122723	0.295665	0.215253	CD14	1	geneontology_Biological_Process	Up
GO:0032823	GO:0032823	regulation of natural killer cell differentiation	1/189	13/18866	0.122723	0.295665	0.215253	PGLYRP2	1	geneontology_Biological_Process	Up
GO:0055091	GO:0055091	phospholipid homeostasis	1/189	13/18866	0.122723	0.295665	0.215253	APOA1	1	geneontology_Biological_Process	Up
GO:0060312	GO:0060312	regulation of blood vessel remodeling	1/189	13/18866	0.122723	0.295665	0.215253	HRG	1	geneontology_Biological_Process	Up
GO:0070071	GO:0070071	proton-transporting two-sector ATPase complex assembly	1/189	13/18866	0.122723	0.295665	0.215253	ALDOB	1	geneontology_Biological_Process	Up
GO:1902563	GO:1902563	regulation of neutrophil activation	1/189	13/18866	0.122723	0.295665	0.215253	PLA2G2A	1	geneontology_Biological_Process	Up
GO:2000121	GO:2000121	regulation of removal of superoxide radicals	1/189	13/18866	0.122723	0.295665	0.215253	RGN	1	geneontology_Biological_Process	Up
GO:0031343	GO:0031343	positive regulation of cell killing	2/189	61/18866	0.124699	0.299718	0.218204	AZGP1/ARG1	2	geneontology_Biological_Process	Up
GO:0033619	GO:0033619	membrane protein proteolysis	2/189	61/18866	0.124699	0.299718	0.218204	TMPRSS6/GPLD1	2	geneontology_Biological_Process	Up
GO:0022408	GO:0022408	negative regulation of cell-cell adhesion	4/189	191/18866	0.125695	0.301756	0.219688	APOA1/PLG/FGG/ARG1	4	geneontology_Biological_Process	Up
GO:0032233	GO:0032233	positive regulation of actin filament bundle assembly	2/189	62/18866	0.128046	0.304984	0.222038	APOA1/SERPINF2	2	geneontology_Biological_Process	Up
GO:0003014	GO:0003014	renal system process	3/189	125/18866	0.130622	0.304984	0.222038	CYP4A11/CYP4F2/SERPINF2	3	geneontology_Biological_Process	Up
GO:0002475	GO:0002475	antigen processing and presentation via MHC class Ib	1/189	14/18866	0.131518	0.304984	0.222038	AZGP1	1	geneontology_Biological_Process	Up
GO:0002829	GO:0002829	negative regulation of type 2 immune response	1/189	14/18866	0.131518	0.304984	0.222038	ARG1	1	geneontology_Biological_Process	Up
GO:0009111	GO:0009111	vitamin catabolic process	1/189	14/18866	0.131518	0.304984	0.222038	CYP4F2	1	geneontology_Biological_Process	Up
GO:0010248	GO:0010248	establishment or maintenance of transmembrane electrochemical gradient	1/189	14/18866	0.131518	0.304984	0.222038	SLC22A1	1	geneontology_Biological_Process	Up
GO:0010989	GO:0010989	negative regulation of low-density lipoprotein particle clearance	1/189	14/18866	0.131518	0.304984	0.222038	APOC3	1	geneontology_Biological_Process	Up
GO:0018410	GO:0018410	C-terminal protein amino acid modification	1/189	14/18866	0.131518	0.304984	0.222038	GPLD1	1	geneontology_Biological_Process	Up
GO:0032933	GO:0032933	SREBP signaling pathway	1/189	14/18866	0.131518	0.304984	0.222038	INSIG1	1	geneontology_Biological_Process	Up
GO:0034392	GO:0034392	negative regulation of smooth muscle cell apoptotic process	1/189	14/18866	0.131518	0.304984	0.222038	APOH	1	geneontology_Biological_Process	Up
GO:0035112	GO:0035112	genitalia morphogenesis	1/189	14/18866	0.131518	0.304984	0.222038	RBP4	1	geneontology_Biological_Process	Up
GO:0035437	GO:0035437	maintenance of protein localization in endoplasmic reticulum	1/189	14/18866	0.131518	0.304984	0.222038	INSIG1	1	geneontology_Biological_Process	Up
GO:0042762	GO:0042762	regulation of sulfur metabolic process	1/189	14/18866	0.131518	0.304984	0.222038	BHMT	1	geneontology_Biological_Process	Up
GO:0043173	GO:0043173	nucleotide salvage	1/189	14/18866	0.131518	0.304984	0.222038	UPP2	1	geneontology_Biological_Process	Up
GO:0043650	GO:0043650	dicarboxylic acid biosynthetic process	1/189	14/18866	0.131518	0.304984	0.222038	HAAO	1	geneontology_Biological_Process	Up
GO:0045472	GO:0045472	response to ether	1/189	14/18866	0.131518	0.304984	0.222038	ABCB4	1	geneontology_Biological_Process	Up
GO:0046007	GO:0046007	negative regulation of activated T cell proliferation	1/189	14/18866	0.131518	0.304984	0.222038	ARG1	1	geneontology_Biological_Process	Up
GO:0046131	GO:0046131	pyrimidine ribonucleoside metabolic process	1/189	14/18866	0.131518	0.304984	0.222038	UPP2	1	geneontology_Biological_Process	Up
GO:0046133	GO:0046133	pyrimidine ribonucleoside catabolic process	1/189	14/18866	0.131518	0.304984	0.222038	UPP2	1	geneontology_Biological_Process	Up
GO:0046321	GO:0046321	positive regulation of fatty acid oxidation	1/189	14/18866	0.131518	0.304984	0.222038	FABP1	1	geneontology_Biological_Process	Up
GO:0046462	GO:0046462	monoacylglycerol metabolic process	1/189	14/18866	0.131518	0.304984	0.222038	MOGAT2	1	geneontology_Biological_Process	Up
GO:0050872	GO:0050872	white fat cell differentiation	1/189	14/18866	0.131518	0.304984	0.222038	FABP4	1	geneontology_Biological_Process	Up
GO:0051709	GO:0051709	regulation of killing of cells of other organism	1/189	14/18866	0.131518	0.304984	0.222038	ARG1	1	geneontology_Biological_Process	Up
GO:0060707	GO:0060707	trophoblast giant cell differentiation	1/189	14/18866	0.131518	0.304984	0.222038	PLG	1	geneontology_Biological_Process	Up
GO:0071285	GO:0071285	cellular response to lithium ion	1/189	14/18866	0.131518	0.304984	0.222038	FABP4	1	geneontology_Biological_Process	Up
GO:0090713	GO:0090713	immunological memory process	1/189	14/18866	0.131518	0.304984	0.222038	PCK1	1	geneontology_Biological_Process	Up
GO:0099550	GO:0099550	trans-synaptic signaling, modulating synaptic transmission	1/189	14/18866	0.131518	0.304984	0.222038	PLG	1	geneontology_Biological_Process	Up
GO:0150011	GO:0150011	regulation of neuron projection arborization	1/189	14/18866	0.131518	0.304984	0.222038	MFSD2A	1	geneontology_Biological_Process	Up
GO:1903624	GO:1903624	regulation of DNA catabolic process	1/189	14/18866	0.131518	0.304984	0.222038	RGN	1	geneontology_Biological_Process	Up
GO:1903726	GO:1903726	negative regulation of phospholipid metabolic process	1/189	14/18866	0.131518	0.304984	0.222038	APOC1	1	geneontology_Biological_Process	Up
GO:1901136	GO:1901136	carbohydrate derivative catabolic process	4/189	195/18866	0.132685	0.307343	0.223755	UPB1/DPYS/PGLYRP2/UPP2	4	geneontology_Biological_Process	Up
GO:0007565	GO:0007565	female pregnancy	4/189	196/18866	0.134458	0.311095	0.226487	AMBP/SLC38A3/IGFBP2/ARG1	4	geneontology_Biological_Process	Up
GO:0050909	GO:0050909	sensory perception of taste	2/189	64/18866	0.134801	0.311537	0.226809	AZGP1/RTP3	2	geneontology_Biological_Process	Up
GO:1903409	GO:1903409	reactive oxygen species biosynthetic process	3/189	128/18866	0.137437	0.314122	0.228691	RGN/AGXT2/CYP1A2	3	geneontology_Biological_Process	Up
GO:0032729	GO:0032729	positive regulation of interferon-gamma production	2/189	65/18866	0.138209	0.314122	0.228691	CD14/IL27	2	geneontology_Biological_Process	Up
GO:0048247	GO:0048247	lymphocyte chemotaxis	2/189	65/18866	0.138209	0.314122	0.228691	CCL16/SAA1	2	geneontology_Biological_Process	Up
GO:0090181	GO:0090181	regulation of cholesterol metabolic process	2/189	65/18866	0.138209	0.314122	0.228691	SEC14L2/CYP7A1	2	geneontology_Biological_Process	Up
GO:0000041	GO:0000041	transition metal ion transport	3/189	129/18866	0.139735	0.314122	0.228691	HPX/HRG/TFR2	3	geneontology_Biological_Process	Up
GO:0001935	GO:0001935	endothelial cell proliferation	4/189	199/18866	0.139833	0.314122	0.228691	ANG/APOA1/APOH/ARG1	4	geneontology_Biological_Process	Up
GO:0006089	GO:0006089	lactate metabolic process	1/189	15/18866	0.140225	0.314122	0.228691	LDHD	1	geneontology_Biological_Process	Up
GO:0006646	GO:0006646	phosphatidylethanolamine biosynthetic process	1/189	15/18866	0.140225	0.314122	0.228691	ETNPPL	1	geneontology_Biological_Process	Up
GO:0009130	GO:0009130	pyrimidine nucleoside monophosphate biosynthetic process	1/189	15/18866	0.140225	0.314122	0.228691	UPP2	1	geneontology_Biological_Process	Up
GO:0010273	GO:0010273	detoxification of copper ion	1/189	15/18866	0.140225	0.314122	0.228691	MT1X	1	geneontology_Biological_Process	Up
GO:0018298	GO:0018298	protein-chromophore linkage	1/189	15/18866	0.140225	0.314122	0.228691	AMBP	1	geneontology_Biological_Process	Up
GO:0019321	GO:0019321	pentose metabolic process	1/189	15/18866	0.140225	0.314122	0.228691	DCXR	1	geneontology_Biological_Process	Up
GO:0020027	GO:0020027	hemoglobin metabolic process	1/189	15/18866	0.140225	0.314122	0.228691	HPX	1	geneontology_Biological_Process	Up
GO:0032328	GO:0032328	alanine transport	1/189	15/18866	0.140225	0.314122	0.228691	SLC38A3	1	geneontology_Biological_Process	Up
GO:0034111	GO:0034111	negative regulation of homotypic cell-cell adhesion	1/189	15/18866	0.140225	0.314122	0.228691	FGG	1	geneontology_Biological_Process	Up
GO:0034638	GO:0034638	phosphatidylcholine catabolic process	1/189	15/18866	0.140225	0.314122	0.228691	APOC1	1	geneontology_Biological_Process	Up
GO:0035745	GO:0035745	T-helper 2 cell cytokine production	1/189	15/18866	0.140225	0.314122	0.228691	ARG1	1	geneontology_Biological_Process	Up
GO:0036376	GO:0036376	sodium ion export across plasma membrane	1/189	15/18866	0.140225	0.314122	0.228691	FXYD1	1	geneontology_Biological_Process	Up
GO:0042362	GO:0042362	fat-soluble vitamin biosynthetic process	1/189	15/18866	0.140225	0.314122	0.228691	CYP3A4	1	geneontology_Biological_Process	Up
GO:0042574	GO:0042574	retinal metabolic process	1/189	15/18866	0.140225	0.314122	0.228691	ALDH8A1	1	geneontology_Biological_Process	Up
GO:0048712	GO:0048712	negative regulation of astrocyte differentiation	1/189	15/18866	0.140225	0.314122	0.228691	F2	1	geneontology_Biological_Process	Up
GO:0051044	GO:0051044	positive regulation of membrane protein ectodomain proteolysis	1/189	15/18866	0.140225	0.314122	0.228691	GPLD1	1	geneontology_Biological_Process	Up
GO:0060347	GO:0060347	heart trabecula formation	1/189	15/18866	0.140225	0.314122	0.228691	RBP4	1	geneontology_Biological_Process	Up
GO:0071501	GO:0071501	cellular response to sterol depletion	1/189	15/18866	0.140225	0.314122	0.228691	INSIG1	1	geneontology_Biological_Process	Up
GO:0090110	GO:0090110	COPII-coated vesicle cargo loading	1/189	15/18866	0.140225	0.314122	0.228691	INSIG1	1	geneontology_Biological_Process	Up
GO:1904251	GO:1904251	regulation of bile acid metabolic process	1/189	15/18866	0.140225	0.314122	0.228691	CYP7A1	1	geneontology_Biological_Process	Up
GO:1905065	GO:1905065	positive regulation of vascular associated smooth muscle cell differentiation	1/189	15/18866	0.140225	0.314122	0.228691	CTH	1	geneontology_Biological_Process	Up
GO:1990169	GO:1990169	stress response to copper ion	1/189	15/18866	0.140225	0.314122	0.228691	MT1X	1	geneontology_Biological_Process	Up
GO:0046365	GO:0046365	monosaccharide catabolic process	2/189	66/18866	0.141635	0.316933	0.230738	DCXR/ALDOB	2	geneontology_Biological_Process	Up
GO:0002221	GO:0002221	pattern recognition receptor signaling pathway	4/189	201/18866	0.143463	0.320673	0.23346	CD14/FGA/FGG/FGB	4	geneontology_Biological_Process	Up
GO:0015980	GO:0015980	energy derivation by oxidation of organic compounds	5/189	278/18866	0.147633	0.328391	0.239079	GYS2/GNMT/GCGR/OGDHL/CYP1A2	5	geneontology_Biological_Process	Up
GO:0002637	GO:0002637	regulation of immunoglobulin production	2/189	68/18866	0.148541	0.328391	0.239079	RBP4/HPX	2	geneontology_Biological_Process	Up
GO:0042446	GO:0042446	hormone biosynthetic process	2/189	68/18866	0.148541	0.328391	0.239079	HSD17B6/CYP11A1	2	geneontology_Biological_Process	Up
GO:0045428	GO:0045428	regulation of nitric oxide biosynthetic process	2/189	68/18866	0.148541	0.328391	0.239079	RGN/AGXT2	2	geneontology_Biological_Process	Up
GO:0002834	GO:0002834	regulation of response to tumor cell	1/189	16/18866	0.148845	0.328391	0.239079	HRG	1	geneontology_Biological_Process	Up
GO:0002837	GO:0002837	regulation of immune response to tumor cell	1/189	16/18866	0.148845	0.328391	0.239079	HRG	1	geneontology_Biological_Process	Up
GO:0006103	GO:0006103	2-oxoglutarate metabolic process	1/189	16/18866	0.148845	0.328391	0.239079	TAT	1	geneontology_Biological_Process	Up
GO:0009129	GO:0009129	pyrimidine nucleoside monophosphate metabolic process	1/189	16/18866	0.148845	0.328391	0.239079	UPP2	1	geneontology_Biological_Process	Up
GO:0033033	GO:0033033	negative regulation of myeloid cell apoptotic process	1/189	16/18866	0.148845	0.328391	0.239079	APOH	1	geneontology_Biological_Process	Up
GO:0043174	GO:0043174	nucleoside salvage	1/189	16/18866	0.148845	0.328391	0.239079	UPP2	1	geneontology_Biological_Process	Up
GO:0046134	GO:0046134	pyrimidine nucleoside biosynthetic process	1/189	16/18866	0.148845	0.328391	0.239079	UPP2	1	geneontology_Biological_Process	Up
GO:0060628	GO:0060628	regulation of ER to Golgi vesicle-mediated transport	1/189	16/18866	0.148845	0.328391	0.239079	INSIG1	1	geneontology_Biological_Process	Up
GO:0031589	GO:0031589	cell-substrate adhesion	6/189	359/18866	0.152543	0.336171	0.244743	HRG/APOA1/PLG/FGA/FGG/FGB	6	geneontology_Biological_Process	Up
GO:0006888	GO:0006888	endoplasmic reticulum to Golgi vesicle-mediated transport	4/189	206/18866	0.1527	0.336171	0.244743	F9/INSIG1/PROZ/F2	4	geneontology_Biological_Process	Up
GO:0001818	GO:0001818	negative regulation of cytokine production	6/189	360/18866	0.153927	0.338506	0.246443	APOA1/F2/APOA2/ORM1/PGLYRP2/ARG1	6	geneontology_Biological_Process	Up
GO:0050866	GO:0050866	negative regulation of cell activation	4/189	207/18866	0.154575	0.338805	0.24666	F2/FGG/PGLYRP2/ARG1	4	geneontology_Biological_Process	Up
GO:0002483	GO:0002483	antigen processing and presentation of endogenous peptide antigen	1/189	17/18866	0.157379	0.338805	0.24666	AZGP1	1	geneontology_Biological_Process	Up
GO:0006577	GO:0006577	amino-acid betaine metabolic process	1/189	17/18866	0.157379	0.338805	0.24666	BHMT	1	geneontology_Biological_Process	Up
GO:0006586	GO:0006586	indolalkylamine metabolic process	1/189	17/18866	0.157379	0.338805	0.24666	HAAO	1	geneontology_Biological_Process	Up
GO:0006991	GO:0006991	response to sterol depletion	1/189	17/18866	0.157379	0.338805	0.24666	INSIG1	1	geneontology_Biological_Process	Up
GO:0009084	GO:0009084	glutamine family amino acid biosynthetic process	1/189	17/18866	0.157379	0.338805	0.24666	OTC	1	geneontology_Biological_Process	Up
GO:0009312	GO:0009312	oligosaccharide biosynthetic process	1/189	17/18866	0.157379	0.338805	0.24666	FBP1	1	geneontology_Biological_Process	Up
GO:0016045	GO:0016045	detection of bacterium	1/189	17/18866	0.157379	0.338805	0.24666	PGLYRP2	1	geneontology_Biological_Process	Up
GO:0019885	GO:0019885	antigen processing and presentation of endogenous peptide antigen via MHC class I	1/189	17/18866	0.157379	0.338805	0.24666	AZGP1	1	geneontology_Biological_Process	Up
GO:0030540	GO:0030540	female genitalia development	1/189	17/18866	0.157379	0.338805	0.24666	RBP4	1	geneontology_Biological_Process	Up
GO:0042448	GO:0042448	progesterone metabolic process	1/189	17/18866	0.157379	0.338805	0.24666	AKR1C4	1	geneontology_Biological_Process	Up
GO:0043649	GO:0043649	dicarboxylic acid catabolic process	1/189	17/18866	0.157379	0.338805	0.24666	ALDH1L1	1	geneontology_Biological_Process	Up
GO:0045722	GO:0045722	positive regulation of gluconeogenesis	1/189	17/18866	0.157379	0.338805	0.24666	GPT	1	geneontology_Biological_Process	Up
GO:0050665	GO:0050665	hydrogen peroxide biosynthetic process	1/189	17/18866	0.157379	0.338805	0.24666	CYP1A2	1	geneontology_Biological_Process	Up
GO:0061687	GO:0061687	detoxification of inorganic compound	1/189	17/18866	0.157379	0.338805	0.24666	MT1X	1	geneontology_Biological_Process	Up
GO:0090336	GO:0090336	positive regulation of brown fat cell differentiation	1/189	17/18866	0.157379	0.338805	0.24666	FNDC5	1	geneontology_Biological_Process	Up
GO:0090494	GO:0090494	dopamine uptake	1/189	17/18866	0.157379	0.338805	0.24666	SLC22A1	1	geneontology_Biological_Process	Up
GO:0097094	GO:0097094	craniofacial suture morphogenesis	1/189	17/18866	0.157379	0.338805	0.24666	INSIG1	1	geneontology_Biological_Process	Up
GO:0097501	GO:0097501	stress response to metal ion	1/189	17/18866	0.157379	0.338805	0.24666	MT1X	1	geneontology_Biological_Process	Up
GO:1901317	GO:1901317	regulation of flagellated sperm motility	1/189	17/18866	0.157379	0.338805	0.24666	RGN	1	geneontology_Biological_Process	Up
GO:0002292	GO:0002292	T cell differentiation involved in immune response	2/189	71/18866	0.159024	0.340909	0.248193	PCK1/IL27	2	geneontology_Biological_Process	Up
GO:0014823	GO:0014823	response to activity	2/189	71/18866	0.159024	0.340909	0.248193	PCK1/FNDC5	2	geneontology_Biological_Process	Up
GO:0035690	GO:0035690	cellular response to drug	2/189	71/18866	0.159024	0.340909	0.248193	FBP1/GPLD1	2	geneontology_Biological_Process	Up
GO:0050891	GO:0050891	multicellular organismal water homeostasis	2/189	71/18866	0.159024	0.340909	0.248193	CYP4A11/CYP4F2	2	geneontology_Biological_Process	Up
GO:0002705	GO:0002705	positive regulation of leukocyte mediated immunity	3/189	138/18866	0.16098	0.344741	0.250982	HPX/AZGP1/ARG1	3	geneontology_Biological_Process	Up
GO:0070555	GO:0070555	response to interleukin-1	4/189	211/18866	0.162158	0.346285	0.252106	PCK1/CCL16/FGG/FGB	4	geneontology_Biological_Process	Up
GO:0009119	GO:0009119	ribonucleoside metabolic process	2/189	72/18866	0.162549	0.346285	0.252106	GNMT/UPP2	2	geneontology_Biological_Process	Up
GO:0042440	GO:0042440	pigment metabolic process	2/189	72/18866	0.162549	0.346285	0.252106	HPX/AMBP	2	geneontology_Biological_Process	Up
GO:0050663	GO:0050663	cytokine secretion	2/189	72/18866	0.162549	0.346285	0.252106	CD14/SAA1	2	geneontology_Biological_Process	Up
GO:1904427	GO:1904427	positive regulation of calcium ion transmembrane transport	2/189	72/18866	0.162549	0.346285	0.252106	RGN/F2	2	geneontology_Biological_Process	Up
GO:0001819	GO:0001819	positive regulation of cytokine production	7/189	447/18866	0.162817	0.346496	0.25226	CD14/IL27/ORM2/SERPINF2/APOA2/ORM1/SAA1	7	geneontology_Biological_Process	Up
GO:0032780	GO:0032780	negative regulation of ATPase activity	1/189	18/18866	0.165828	0.349451	0.254411	RGN	1	geneontology_Biological_Process	Up
GO:0036148	GO:0036148	phosphatidylglycerol acyl-chain remodeling	1/189	18/18866	0.165828	0.349451	0.254411	PLA2G2A	1	geneontology_Biological_Process	Up
GO:0036149	GO:0036149	phosphatidylinositol acyl-chain remodeling	1/189	18/18866	0.165828	0.349451	0.254411	PLA2G2A	1	geneontology_Biological_Process	Up
GO:0044827	GO:0044827	modulation by host of viral genome replication	1/189	18/18866	0.165828	0.349451	0.254411	IFI27	1	geneontology_Biological_Process	Up
GO:0046112	GO:0046112	nucleobase biosynthetic process	1/189	18/18866	0.165828	0.349451	0.254411	CPS1	1	geneontology_Biological_Process	Up
GO:0051023	GO:0051023	regulation of immunoglobulin secretion	1/189	18/18866	0.165828	0.349451	0.254411	RBP4	1	geneontology_Biological_Process	Up
GO:0051923	GO:0051923	sulfation	1/189	18/18866	0.165828	0.349451	0.254411	SULT2A1	1	geneontology_Biological_Process	Up
GO:0090493	GO:0090493	catecholamine uptake	1/189	18/18866	0.165828	0.349451	0.254411	SLC22A1	1	geneontology_Biological_Process	Up
GO:1902074	GO:1902074	response to salt	1/189	18/18866	0.165828	0.349451	0.254411	RIDA	1	geneontology_Biological_Process	Up
GO:0002709	GO:0002709	regulation of T cell mediated immunity	2/189	73/18866	0.166088	0.349451	0.254411	AZGP1/ARG1	2	geneontology_Biological_Process	Up
GO:0015807	GO:0015807	L-amino acid transport	2/189	73/18866	0.166088	0.349451	0.254411	SLC38A3/ARG1	2	geneontology_Biological_Process	Up
GO:0006801	GO:0006801	superoxide metabolic process	2/189	74/18866	0.16964	0.356191	0.259318	PON3/RGN	2	geneontology_Biological_Process	Up
GO:0032024	GO:0032024	positive regulation of insulin secretion	2/189	74/18866	0.16964	0.356191	0.259318	RBP4/GPLD1	2	geneontology_Biological_Process	Up
GO:0072001	GO:0072001	renal system development	5/189	292/18866	0.170055	0.356696	0.259686	RBP4/RIDA/CYP4A22/CYP4A11/RGN	5	geneontology_Biological_Process	Up
GO:0030879	GO:0030879	mammary gland development	3/189	142/18866	0.170721	0.357727	0.260437	SERPINC1/CDO1/ARG1	3	geneontology_Biological_Process	Up
GO:0008286	GO:0008286	insulin receptor signaling pathway	3/189	143/18866	0.173183	0.361663	0.263302	GPLD1/IGFBP1/AHSG	3	geneontology_Biological_Process	Up
GO:1900076	GO:1900076	regulation of cellular response to insulin stimulus	2/189	75/18866	0.173205	0.361663	0.263302	GPLD1/AHSG	2	geneontology_Biological_Process	Up
GO:0002710	GO:0002710	negative regulation of T cell mediated immunity	1/189	19/18866	0.174193	0.361663	0.263302	ARG1	1	geneontology_Biological_Process	Up
GO:0010744	GO:0010744	positive regulation of macrophage derived foam cell differentiation	1/189	19/18866	0.174193	0.361663	0.263302	PLA2G2A	1	geneontology_Biological_Process	Up
GO:0033189	GO:0033189	response to vitamin A	1/189	19/18866	0.174193	0.361663	0.263302	ARG1	1	geneontology_Biological_Process	Up
GO:0044320	GO:0044320	cellular response to leptin stimulus	1/189	19/18866	0.174193	0.361663	0.263302	FGB	1	geneontology_Biological_Process	Up
GO:0045063	GO:0045063	T-helper 1 cell differentiation	1/189	19/18866	0.174193	0.361663	0.263302	IL27	1	geneontology_Biological_Process	Up
GO:0098543	GO:0098543	detection of other organism	1/189	19/18866	0.174193	0.361663	0.263302	PGLYRP2	1	geneontology_Biological_Process	Up
GO:1900747	GO:1900747	negative regulation of vascular endothelial growth factor signaling pathway	1/189	19/18866	0.174193	0.361663	0.263302	HRG	1	geneontology_Biological_Process	Up
GO:0006979	GO:0006979	response to oxidative stress	7/189	458/18866	0.177157	0.367444	0.267511	HP/TAT/HAO1/RGN/FABP1/ARG1/CYP2E1	7	geneontology_Biological_Process	Up
GO:0042542	GO:0042542	response to hydrogen peroxide	3/189	146/18866	0.180628	0.373542	0.27195	HP/FABP1/ARG1	3	geneontology_Biological_Process	Up
GO:0002418	GO:0002418	immune response to tumor cell	1/189	20/18866	0.182474	0.373542	0.27195	HRG	1	geneontology_Biological_Process	Up
GO:0006144	GO:0006144	purine nucleobase metabolic process	1/189	20/18866	0.182474	0.373542	0.27195	TTR	1	geneontology_Biological_Process	Up
GO:0010042	GO:0010042	response to manganese ion	1/189	20/18866	0.182474	0.373542	0.27195	ARG1	1	geneontology_Biological_Process	Up
GO:0010988	GO:0010988	regulation of low-density lipoprotein particle clearance	1/189	20/18866	0.182474	0.373542	0.27195	APOC3	1	geneontology_Biological_Process	Up
GO:0042474	GO:0042474	middle ear morphogenesis	1/189	20/18866	0.182474	0.373542	0.27195	INSIG1	1	geneontology_Biological_Process	Up
GO:0045019	GO:0045019	negative regulation of nitric oxide biosynthetic process	1/189	20/18866	0.182474	0.373542	0.27195	RGN	1	geneontology_Biological_Process	Up
GO:0045056	GO:0045056	transcytosis	1/189	20/18866	0.182474	0.373542	0.27195	MFSD2A	1	geneontology_Biological_Process	Up
GO:0046655	GO:0046655	folic acid metabolic process	1/189	20/18866	0.182474	0.373542	0.27195	ALDH1L1	1	geneontology_Biological_Process	Up
GO:0060353	GO:0060353	regulation of cell adhesion molecule production	1/189	20/18866	0.182474	0.373542	0.27195	APOA1	1	geneontology_Biological_Process	Up
GO:0071636	GO:0071636	positive regulation of transforming growth factor beta production	1/189	20/18866	0.182474	0.373542	0.27195	SERPINF2	1	geneontology_Biological_Process	Up
GO:1900409	GO:1900409	positive regulation of cellular response to oxidative stress	1/189	20/18866	0.182474	0.373542	0.27195	RGN	1	geneontology_Biological_Process	Up
GO:1904406	GO:1904406	negative regulation of nitric oxide metabolic process	1/189	20/18866	0.182474	0.373542	0.27195	RGN	1	geneontology_Biological_Process	Up
GO:1904064	GO:1904064	positive regulation of cation transmembrane transport	3/189	147/18866	0.183128	0.374506	0.272652	RGN/F2/FXYD1	3	geneontology_Biological_Process	Up
GO:0002683	GO:0002683	negative regulation of immune system process	7/189	463/18866	0.18385	0.375477	0.273359	AMBP/C4BPB/APOA1/C4BPA/APOA2/PGLYRP2/ARG1	7	geneontology_Biological_Process	Up
GO:0001895	GO:0001895	retina homeostasis	2/189	78/18866	0.183971	0.375477	0.273359	AZGP1/ALB	2	geneontology_Biological_Process	Up
GO:0006909	GO:0006909	phagocytosis	6/189	382/18866	0.18573	0.378689	0.275697	CD14/C4BPB/APOA1/C4BPA/APOA2/AHSG	6	geneontology_Biological_Process	Up
GO:0006809	GO:0006809	nitric oxide biosynthetic process	2/189	79/18866	0.187581	0.379303	0.276145	RGN/AGXT2	2	geneontology_Biological_Process	Up
GO:0043462	GO:0043462	regulation of ATPase activity	2/189	79/18866	0.187581	0.379303	0.276145	ALDOB/RGN	2	geneontology_Biological_Process	Up
GO:0045732	GO:0045732	positive regulation of protein catabolic process	4/189	225/18866	0.189707	0.379303	0.276145	RGN/C4BPB/C4BPA/GPLD1	4	geneontology_Biological_Process	Up
GO:0031349	GO:0031349	positive regulation of defense response	6/189	385/18866	0.190257	0.379303	0.276145	HPX/F12/KLKB1/FABP4/ARG1/PLA2G2A	6	geneontology_Biological_Process	Up
GO:0006833	GO:0006833	water transport	1/189	21/18866	0.190673	0.379303	0.276145	AQP9	1	geneontology_Biological_Process	Up
GO:0006837	GO:0006837	serotonin transport	1/189	21/18866	0.190673	0.379303	0.276145	SLC22A1	1	geneontology_Biological_Process	Up
GO:0009067	GO:0009067	aspartate family amino acid biosynthetic process	1/189	21/18866	0.190673	0.379303	0.276145	BHMT	1	geneontology_Biological_Process	Up
GO:0009713	GO:0009713	catechol-containing compound biosynthetic process	1/189	21/18866	0.190673	0.379303	0.276145	DAO	1	geneontology_Biological_Process	Up
GO:0010310	GO:0010310	regulation of hydrogen peroxide metabolic process	1/189	21/18866	0.190673	0.379303	0.276145	HP	1	geneontology_Biological_Process	Up
GO:0010893	GO:0010893	positive regulation of steroid biosynthetic process	1/189	21/18866	0.190673	0.379303	0.276145	CYP7A1	1	geneontology_Biological_Process	Up
GO:0016137	GO:0016137	glycoside metabolic process	1/189	21/18866	0.190673	0.379303	0.276145	AKR1C4	1	geneontology_Biological_Process	Up
GO:0030277	GO:0030277	maintenance of gastrointestinal epithelium	1/189	21/18866	0.190673	0.379303	0.276145	RBP4	1	geneontology_Biological_Process	Up
GO:0030502	GO:0030502	negative regulation of bone mineralization	1/189	21/18866	0.190673	0.379303	0.276145	AHSG	1	geneontology_Biological_Process	Up
GO:0036150	GO:0036150	phosphatidylserine acyl-chain remodeling	1/189	21/18866	0.190673	0.379303	0.276145	PLA2G2A	1	geneontology_Biological_Process	Up
GO:0036499	GO:0036499	PERK-mediated unfolded protein response	1/189	21/18866	0.190673	0.379303	0.276145	IGFBP1	1	geneontology_Biological_Process	Up
GO:0042423	GO:0042423	catecholamine biosynthetic process	1/189	21/18866	0.190673	0.379303	0.276145	DAO	1	geneontology_Biological_Process	Up
GO:0046716	GO:0046716	muscle cell cellular homeostasis	1/189	21/18866	0.190673	0.379303	0.276145	PLG	1	geneontology_Biological_Process	Up
GO:0048305	GO:0048305	immunoglobulin secretion	1/189	21/18866	0.190673	0.379303	0.276145	RBP4	1	geneontology_Biological_Process	Up
GO:0051957	GO:0051957	positive regulation of amino acid transport	1/189	21/18866	0.190673	0.379303	0.276145	SLC38A3	1	geneontology_Biological_Process	Up
GO:0060065	GO:0060065	uterus development	1/189	21/18866	0.190673	0.379303	0.276145	RBP4	1	geneontology_Biological_Process	Up
GO:0060716	GO:0060716	labyrinthine layer blood vessel development	1/189	21/18866	0.190673	0.379303	0.276145	PLG	1	geneontology_Biological_Process	Up
GO:0090330	GO:0090330	regulation of platelet aggregation	1/189	21/18866	0.190673	0.379303	0.276145	FGG	1	geneontology_Biological_Process	Up
GO:0140467	GO:0140467	integrated stress response signaling	1/189	21/18866	0.190673	0.379303	0.276145	IGFBP1	1	geneontology_Biological_Process	Up
GO:1902307	GO:1902307	positive regulation of sodium ion transmembrane transport	1/189	21/18866	0.190673	0.379303	0.276145	FXYD1	1	geneontology_Biological_Process	Up
GO:1902548	GO:1902548	negative regulation of cellular response to vascular endothelial growth factor stimulus	1/189	21/18866	0.190673	0.379303	0.276145	HRG	1	geneontology_Biological_Process	Up
GO:0006110	GO:0006110	regulation of glycolytic process	2/189	80/18866	0.191201	0.379615	0.276372	PFKFB1/FBP1	2	geneontology_Biological_Process	Up
GO:0048678	GO:0048678	response to axon injury	2/189	80/18866	0.191201	0.379615	0.276372	APOA1/ARG1	2	geneontology_Biological_Process	Up
GO:0044706	GO:0044706	multi-multicellular organism process	4/189	226/18866	0.19173	0.380295	0.276867	AMBP/SLC38A3/IGFBP2/ARG1	4	geneontology_Biological_Process	Up
GO:0002440	GO:0002440	production of molecular mediator of immune response	5/189	306/18866	0.193715	0.38386	0.279462	RBP4/HPX/APOA1/APOA2/ARG1	5	geneontology_Biological_Process	Up
GO:0001960	GO:0001960	negative regulation of cytokine-mediated signaling pathway	2/189	81/18866	0.194831	0.385697	0.2808	APOA1/ARG1	2	geneontology_Biological_Process	Up
GO:1902930	GO:1902930	regulation of alcohol biosynthetic process	2/189	82/18866	0.198469	0.389384	0.283484	SEC14L2/CYP7A1	2	geneontology_Biological_Process	Up
GO:0001779	GO:0001779	natural killer cell differentiation	1/189	22/18866	0.19879	0.389384	0.283484	PGLYRP2	1	geneontology_Biological_Process	Up
GO:0006379	GO:0006379	mRNA cleavage	1/189	22/18866	0.19879	0.389384	0.283484	RNASE4	1	geneontology_Biological_Process	Up
GO:0009220	GO:0009220	pyrimidine ribonucleotide biosynthetic process	1/189	22/18866	0.19879	0.389384	0.283484	UPP2	1	geneontology_Biological_Process	Up
GO:0032928	GO:0032928	regulation of superoxide anion generation	1/189	22/18866	0.19879	0.389384	0.283484	PON3	1	geneontology_Biological_Process	Up
GO:0042454	GO:0042454	ribonucleoside catabolic process	1/189	22/18866	0.19879	0.389384	0.283484	UPP2	1	geneontology_Biological_Process	Up
GO:0051152	GO:0051152	positive regulation of smooth muscle cell differentiation	1/189	22/18866	0.19879	0.389384	0.283484	CTH	1	geneontology_Biological_Process	Up
GO:0060352	GO:0060352	cell adhesion molecule production	1/189	22/18866	0.19879	0.389384	0.283484	APOA1	1	geneontology_Biological_Process	Up
GO:1901685	GO:1901685	glutathione derivative metabolic process	1/189	22/18866	0.19879	0.389384	0.283484	GSTA1	1	geneontology_Biological_Process	Up
GO:1901687	GO:1901687	glutathione derivative biosynthetic process	1/189	22/18866	0.19879	0.389384	0.283484	GSTA1	1	geneontology_Biological_Process	Up
GO:1902884	GO:1902884	positive regulation of response to oxidative stress	1/189	22/18866	0.19879	0.389384	0.283484	RGN	1	geneontology_Biological_Process	Up
GO:0007160	GO:0007160	cell-matrix adhesion	4/189	230/18866	0.19989	0.39079	0.284508	HRG/FGA/FGG/FGB	4	geneontology_Biological_Process	Up
GO:0097191	GO:0097191	extrinsic apoptotic signaling pathway	4/189	230/18866	0.19989	0.39079	0.284508	FGA/FGG/FGB/IFI27	4	geneontology_Biological_Process	Up
GO:0090305	GO:0090305	nucleic acid phosphodiester bond hydrolysis	5/189	313/18866	0.205961	0.401659	0.29242	RNASE4/ANG/RIDA/AZGP1/DNASE1L3	5	geneontology_Biological_Process	Up
GO:0006865	GO:0006865	amino acid transport	3/189	156/18866	0.206031	0.401659	0.29242	SLC25A47/SLC38A3/ARG1	3	geneontology_Biological_Process	Up
GO:2001234	GO:2001234	negative regulation of apoptotic signaling pathway	4/189	233/18866	0.206079	0.401659	0.29242	FGA/FGG/CTH/FGB	4	geneontology_Biological_Process	Up
GO:0006907	GO:0006907	pinocytosis	1/189	23/18866	0.206826	0.401659	0.29242	AHSG	1	geneontology_Biological_Process	Up
GO:0035743	GO:0035743	CD4-positive, alpha-beta T cell cytokine production	1/189	23/18866	0.206826	0.401659	0.29242	ARG1	1	geneontology_Biological_Process	Up
GO:0051043	GO:0051043	regulation of membrane protein ectodomain proteolysis	1/189	23/18866	0.206826	0.401659	0.29242	GPLD1	1	geneontology_Biological_Process	Up
GO:0060044	GO:0060044	negative regulation of cardiac muscle cell proliferation	1/189	23/18866	0.206826	0.401659	0.29242	RBP4	1	geneontology_Biological_Process	Up
GO:0006767	GO:0006767	water-soluble vitamin metabolic process	2/189	85/18866	0.209432	0.406333	0.295823	RGN/ALDH1L1	2	geneontology_Biological_Process	Up
GO:0030203	GO:0030203	glycosaminoglycan metabolic process	3/189	158/18866	0.211208	0.408185	0.297171	ITIH3/ITIH1/PGLYRP2	3	geneontology_Biological_Process	Up
GO:0035023	GO:0035023	regulation of Rho protein signal transduction	2/189	86/18866	0.2131	0.408185	0.297171	APOC3/APOA1	2	geneontology_Biological_Process	Up
GO:0055067	GO:0055067	monovalent inorganic cation homeostasis	3/189	159/18866	0.213807	0.408185	0.297171	CYP4A11/CYP4F2/OTC	3	geneontology_Biological_Process	Up
GO:0002438	GO:0002438	acute inflammatory response to antigenic stimulus	1/189	24/18866	0.214781	0.408185	0.297171	SERPINC1	1	geneontology_Biological_Process	Up
GO:0009218	GO:0009218	pyrimidine ribonucleotide metabolic process	1/189	24/18866	0.214781	0.408185	0.297171	UPP2	1	geneontology_Biological_Process	Up
GO:0010804	GO:0010804	negative regulation of tumor necrosis factor-mediated signaling pathway	1/189	24/18866	0.214781	0.408185	0.297171	APOA1	1	geneontology_Biological_Process	Up
GO:0014850	GO:0014850	response to muscle activity	1/189	24/18866	0.214781	0.408185	0.297171	FNDC5	1	geneontology_Biological_Process	Up
GO:0019883	GO:0019883	antigen processing and presentation of endogenous antigen	1/189	24/18866	0.214781	0.408185	0.297171	AZGP1	1	geneontology_Biological_Process	Up
GO:0030325	GO:0030325	adrenal gland development	1/189	24/18866	0.214781	0.408185	0.297171	APOA1	1	geneontology_Biological_Process	Up
GO:0032891	GO:0032891	negative regulation of organic acid transport	1/189	24/18866	0.214781	0.408185	0.297171	CYP4F2	1	geneontology_Biological_Process	Up
GO:0034035	GO:0034035	purine ribonucleoside bisphosphate metabolic process	1/189	24/18866	0.214781	0.408185	0.297171	SULT2A1	1	geneontology_Biological_Process	Up
GO:0042430	GO:0042430	indole-containing compound metabolic process	1/189	24/18866	0.214781	0.408185	0.297171	HAAO	1	geneontology_Biological_Process	Up
GO:0044321	GO:0044321	response to leptin	1/189	24/18866	0.214781	0.408185	0.297171	FGB	1	geneontology_Biological_Process	Up
GO:0044550	GO:0044550	secondary metabolite biosynthetic process	1/189	24/18866	0.214781	0.408185	0.297171	CYP1A2	1	geneontology_Biological_Process	Up
GO:0045821	GO:0045821	positive regulation of glycolytic process	1/189	24/18866	0.214781	0.408185	0.297171	PFKFB1	1	geneontology_Biological_Process	Up
GO:0046835	GO:0046835	carbohydrate phosphorylation	1/189	24/18866	0.214781	0.408185	0.297171	PFKFB1	1	geneontology_Biological_Process	Up
GO:0050427	GO:0050427	3'-phosphoadenosine 5'-phosphosulfate metabolic process	1/189	24/18866	0.214781	0.408185	0.297171	SULT2A1	1	geneontology_Biological_Process	Up
GO:0060295	GO:0060295	regulation of cilium movement involved in cell motility	1/189	24/18866	0.214781	0.408185	0.297171	RGN	1	geneontology_Biological_Process	Up
GO:0071294	GO:0071294	cellular response to zinc ion	1/189	24/18866	0.214781	0.408185	0.297171	MT1X	1	geneontology_Biological_Process	Up
GO:0090335	GO:0090335	regulation of brown fat cell differentiation	1/189	24/18866	0.214781	0.408185	0.297171	FNDC5	1	geneontology_Biological_Process	Up
GO:0098581	GO:0098581	detection of external biotic stimulus	1/189	24/18866	0.214781	0.408185	0.297171	PGLYRP2	1	geneontology_Biological_Process	Up
GO:1902019	GO:1902019	regulation of cilium-dependent cell motility	1/189	24/18866	0.214781	0.408185	0.297171	RGN	1	geneontology_Biological_Process	Up
GO:0007568	GO:0007568	aging	5/189	319/18866	0.216659	0.410826	0.299094	PCK1/RGN/IGFBP2/ARG1/IGFBP1	5	geneontology_Biological_Process	Up
GO:0060761	GO:0060761	negative regulation of response to cytokine stimulus	2/189	87/18866	0.216774	0.410826	0.299094	APOA1/ARG1	2	geneontology_Biological_Process	Up
GO:0090502	GO:0090502	RNA phosphodiester bond hydrolysis, endonucleolytic	2/189	87/18866	0.216774	0.410826	0.299094	RNASE4/RIDA	2	geneontology_Biological_Process	Up
GO:0034612	GO:0034612	response to tumor necrosis factor	5/189	320/18866	0.218458	0.413634	0.301138	PCK1/CD14/CCL16/FABP4/APOA1	5	geneontology_Biological_Process	Up
GO:0034767	GO:0034767	positive regulation of ion transmembrane transport	3/189	161/18866	0.219026	0.414325	0.301641	RGN/F2/FXYD1	3	geneontology_Biological_Process	Up
GO:0043467	GO:0043467	regulation of generation of precursor metabolites and energy	3/189	162/18866	0.221646	0.417684	0.304087	PFKFB1/FBP1/GCGR	3	geneontology_Biological_Process	Up
GO:2001236	GO:2001236	regulation of extrinsic apoptotic signaling pathway	3/189	162/18866	0.221646	0.417684	0.304087	FGA/FGG/FGB	3	geneontology_Biological_Process	Up
GO:0009081	GO:0009081	branched-chain amino acid metabolic process	1/189	25/18866	0.222658	0.417684	0.304087	SDS	1	geneontology_Biological_Process	Up
GO:0015740	GO:0015740	C4-dicarboxylate transport	1/189	25/18866	0.222658	0.417684	0.304087	SLC13A5	1	geneontology_Biological_Process	Up
GO:0015874	GO:0015874	norepinephrine transport	1/189	25/18866	0.222658	0.417684	0.304087	SLC22A1	1	geneontology_Biological_Process	Up
GO:0051788	GO:0051788	response to misfolded protein	1/189	25/18866	0.222658	0.417684	0.304087	F12	1	geneontology_Biological_Process	Up
GO:0051894	GO:0051894	positive regulation of focal adhesion assembly	1/189	25/18866	0.222658	0.417684	0.304087	HRG	1	geneontology_Biological_Process	Up
GO:0097164	GO:0097164	ammonium ion metabolic process	1/189	25/18866	0.222658	0.417684	0.304087	BHMT	1	geneontology_Biological_Process	Up
GO:2001026	GO:2001026	regulation of endothelial cell chemotaxis	1/189	25/18866	0.222658	0.417684	0.304087	HRG	1	geneontology_Biological_Process	Up
GO:0006814	GO:0006814	sodium ion transport	4/189	241/18866	0.222847	0.417684	0.304087	SLC10A1/SLC13A5/SLC38A3/FXYD1	4	geneontology_Biological_Process	Up
GO:0043470	GO:0043470	regulation of carbohydrate catabolic process	2/189	90/18866	0.22783	0.424928	0.309361	PFKFB1/FBP1	2	geneontology_Biological_Process	Up
GO:0046427	GO:0046427	positive regulation of receptor signaling pathway via JAK-STAT	2/189	90/18866	0.22783	0.424928	0.309361	HPX/F2	2	geneontology_Biological_Process	Up
GO:0070542	GO:0070542	response to fatty acid	2/189	90/18866	0.22783	0.424928	0.309361	PON1/CPS1	2	geneontology_Biological_Process	Up
GO:0071496	GO:0071496	cellular response to external stimulus	5/189	326/18866	0.229354	0.424928	0.309361	PCK1/GCGR/SLC38A3/MFSD2A/ALB	5	geneontology_Biological_Process	Up
GO:0002347	GO:0002347	response to tumor cell	1/189	26/18866	0.230456	0.424928	0.309361	HRG	1	geneontology_Biological_Process	Up
GO:0003081	GO:0003081	regulation of systemic arterial blood pressure by renin-angiotensin	1/189	26/18866	0.230456	0.424928	0.309361	SERPINF2	1	geneontology_Biological_Process	Up
GO:0006309	GO:0006309	apoptotic DNA fragmentation	1/189	26/18866	0.230456	0.424928	0.309361	DNASE1L3	1	geneontology_Biological_Process	Up
GO:0006700	GO:0006700	C21-steroid hormone biosynthetic process	1/189	26/18866	0.230456	0.424928	0.309361	CYP11A1	1	geneontology_Biological_Process	Up
GO:0019430	GO:0019430	removal of superoxide radicals	1/189	26/18866	0.230456	0.424928	0.309361	RGN	1	geneontology_Biological_Process	Up
GO:0035902	GO:0035902	response to immobilization stress	1/189	26/18866	0.230456	0.424928	0.309361	CYP1A2	1	geneontology_Biological_Process	Up
GO:0036152	GO:0036152	phosphatidylethanolamine acyl-chain remodeling	1/189	26/18866	0.230456	0.424928	0.309361	PLA2G2A	1	geneontology_Biological_Process	Up
GO:0042104	GO:0042104	positive regulation of activated T cell proliferation	1/189	26/18866	0.230456	0.424928	0.309361	IGFBP2	1	geneontology_Biological_Process	Up
GO:0042832	GO:0042832	defense response to protozoan	1/189	26/18866	0.230456	0.424928	0.309361	ARG1	1	geneontology_Biological_Process	Up
GO:0060343	GO:0060343	trabecula formation	1/189	26/18866	0.230456	0.424928	0.309361	RBP4	1	geneontology_Biological_Process	Up
GO:0060706	GO:0060706	cell differentiation involved in embryonic placenta development	1/189	26/18866	0.230456	0.424928	0.309361	PLG	1	geneontology_Biological_Process	Up
GO:0070633	GO:0070633	transepithelial transport	1/189	26/18866	0.230456	0.424928	0.309361	GPLD1	1	geneontology_Biological_Process	Up
GO:0140058	GO:0140058	neuron projection arborization	1/189	26/18866	0.230456	0.424928	0.309361	MFSD2A	1	geneontology_Biological_Process	Up
GO:1903010	GO:1903010	regulation of bone development	1/189	26/18866	0.230456	0.424928	0.309361	RGN	1	geneontology_Biological_Process	Up
GO:0033273	GO:0033273	response to vitamin	2/189	91/18866	0.231524	0.424981	0.3094	OTC/ARG1	2	geneontology_Biological_Process	Up
GO:0051492	GO:0051492	regulation of stress fiber assembly	2/189	91/18866	0.231524	0.424981	0.3094	APOA1/SERPINF2	2	geneontology_Biological_Process	Up
GO:0051952	GO:0051952	regulation of amine transport	2/189	91/18866	0.231524	0.424981	0.3094	SLC38A3/ARG1	2	geneontology_Biological_Process	Up
GO:0060333	GO:0060333	interferon-gamma-mediated signaling pathway	2/189	91/18866	0.231524	0.424981	0.3094	HPX/ARG1	2	geneontology_Biological_Process	Up
GO:0097306	GO:0097306	cellular response to alcohol	2/189	91/18866	0.231524	0.424981	0.3094	GPLD1/CYP7A1	2	geneontology_Biological_Process	Up
GO:0042129	GO:0042129	regulation of T cell proliferation	3/189	167/18866	0.234836	0.430672	0.313543	IL27/IGFBP2/ARG1	3	geneontology_Biological_Process	Up
GO:0001655	GO:0001655	urogenital system development	5/189	330/18866	0.236706	0.433297	0.315454	RBP4/RIDA/CYP4A22/CYP4A11/RGN	5	geneontology_Biological_Process	Up
GO:0001556	GO:0001556	oocyte maturation	1/189	27/18866	0.238176	0.433297	0.315454	ANG	1	geneontology_Biological_Process	Up
GO:0001562	GO:0001562	response to protozoan	1/189	27/18866	0.238176	0.433297	0.315454	ARG1	1	geneontology_Biological_Process	Up
GO:0002825	GO:0002825	regulation of T-helper 1 type immune response	1/189	27/18866	0.238176	0.433297	0.315454	IL27	1	geneontology_Biological_Process	Up
GO:0006735	GO:0006735	NADH regeneration	1/189	27/18866	0.238176	0.433297	0.315454	ALDOB	1	geneontology_Biological_Process	Up
GO:0034389	GO:0034389	lipid droplet organization	1/189	27/18866	0.238176	0.433297	0.315454	HSD17B13	1	geneontology_Biological_Process	Up
GO:0035459	GO:0035459	vesicle cargo loading	1/189	27/18866	0.238176	0.433297	0.315454	INSIG1	1	geneontology_Biological_Process	Up
GO:0061621	GO:0061621	canonical glycolysis	1/189	27/18866	0.238176	0.433297	0.315454	ALDOB	1	geneontology_Biological_Process	Up
GO:0061718	GO:0061718	glucose catabolic process to pyruvate	1/189	27/18866	0.238176	0.433297	0.315454	ALDOB	1	geneontology_Biological_Process	Up
GO:0030510	GO:0030510	regulation of BMP signaling pathway	2/189	93/18866	0.238924	0.433501	0.315603	HJV/TMPRSS6	2	geneontology_Biological_Process	Up
GO:0032677	GO:0032677	regulation of interleukin-8 production	2/189	93/18866	0.238924	0.433501	0.315603	CD14/APOA2	2	geneontology_Biological_Process	Up
GO:1904894	GO:1904894	positive regulation of receptor signaling pathway via STAT	2/189	93/18866	0.238924	0.433501	0.315603	HPX/F2	2	geneontology_Biological_Process	Up
GO:0034614	GO:0034614	cellular response to reactive oxygen species	3/189	170/18866	0.242816	0.439761	0.32016	RGN/FABP1/ARG1	3	geneontology_Biological_Process	Up
GO:0032496	GO:0032496	response to lipopolysaccharide	5/189	334/18866	0.244123	0.439761	0.32016	PCK1/CD14/CPS1/ARG1/CYP1A2	5	geneontology_Biological_Process	Up
GO:0030307	GO:0030307	positive regulation of cell growth	3/189	171/18866	0.245486	0.439761	0.32016	F2/MFSD2A/IGFBP1	3	geneontology_Biological_Process	Up
GO:0001916	GO:0001916	positive regulation of T cell mediated cytotoxicity	1/189	28/18866	0.245818	0.439761	0.32016	AZGP1	1	geneontology_Biological_Process	Up
GO:0010669	GO:0010669	epithelial structure maintenance	1/189	28/18866	0.245818	0.439761	0.32016	RBP4	1	geneontology_Biological_Process	Up
GO:0010894	GO:0010894	negative regulation of steroid biosynthetic process	1/189	28/18866	0.245818	0.439761	0.32016	INSIG1	1	geneontology_Biological_Process	Up
GO:0015867	GO:0015867	ATP transport	1/189	28/18866	0.245818	0.439761	0.32016	SLC25A47	1	geneontology_Biological_Process	Up
GO:0042044	GO:0042044	fluid transport	1/189	28/18866	0.245818	0.439761	0.32016	AQP9	1	geneontology_Biological_Process	Up
GO:0043901	GO:0043901	negative regulation of multi-organism process	1/189	28/18866	0.245818	0.439761	0.32016	ZG16	1	geneontology_Biological_Process	Up
GO:0045686	GO:0045686	negative regulation of glial cell differentiation	1/189	28/18866	0.245818	0.439761	0.32016	F2	1	geneontology_Biological_Process	Up
GO:0045745	GO:0045745	positive regulation of G protein-coupled receptor signaling pathway	1/189	28/18866	0.245818	0.439761	0.32016	F2	1	geneontology_Biological_Process	Up
GO:0061620	GO:0061620	glycolytic process through glucose-6-phosphate	1/189	28/18866	0.245818	0.439761	0.32016	ALDOB	1	geneontology_Biological_Process	Up
GO:0071450	GO:0071450	cellular response to oxygen radical	1/189	28/18866	0.245818	0.439761	0.32016	RGN	1	geneontology_Biological_Process	Up
GO:0071451	GO:0071451	cellular response to superoxide	1/189	28/18866	0.245818	0.439761	0.32016	RGN	1	geneontology_Biological_Process	Up
GO:1902932	GO:1902932	positive regulation of alcohol biosynthetic process	1/189	28/18866	0.245818	0.439761	0.32016	CYP7A1	1	geneontology_Biological_Process	Up
GO:1905063	GO:1905063	regulation of vascular associated smooth muscle cell differentiation	1/189	28/18866	0.245818	0.439761	0.32016	CTH	1	geneontology_Biological_Process	Up
GO:0007589	GO:0007589	body fluid secretion	2/189	95/18866	0.246336	0.440301	0.320553	SERPINC1/CDO1	2	geneontology_Biological_Process	Up
GO:0006022	GO:0006022	aminoglycan metabolic process	3/189	172/18866	0.248161	0.443176	0.322646	ITIH3/ITIH1/PGLYRP2	3	geneontology_Biological_Process	Up
GO:0045926	GO:0045926	negative regulation of growth	4/189	254/18866	0.250808	0.447511	0.325802	RBP4/FBP1/HRG/MT1X	4	geneontology_Biological_Process	Up
GO:0002230	GO:0002230	positive regulation of defense response to virus by host	1/189	29/18866	0.253385	0.449631	0.327345	IL27	1	geneontology_Biological_Process	Up
GO:0033032	GO:0033032	regulation of myeloid cell apoptotic process	1/189	29/18866	0.253385	0.449631	0.327345	APOH	1	geneontology_Biological_Process	Up
GO:0036151	GO:0036151	phosphatidylcholine acyl-chain remodeling	1/189	29/18866	0.253385	0.449631	0.327345	PLA2G2A	1	geneontology_Biological_Process	Up
GO:0061615	GO:0061615	glycolytic process through fructose-6-phosphate	1/189	29/18866	0.253385	0.449631	0.327345	ALDOB	1	geneontology_Biological_Process	Up
GO:0070861	GO:0070861	regulation of protein exit from endoplasmic reticulum	1/189	29/18866	0.253385	0.449631	0.327345	INSIG1	1	geneontology_Biological_Process	Up
GO:0150117	GO:0150117	positive regulation of cell-substrate junction organization	1/189	29/18866	0.253385	0.449631	0.327345	HRG	1	geneontology_Biological_Process	Up
GO:0071674	GO:0071674	mononuclear cell migration	2/189	97/18866	0.253756	0.449631	0.327345	CCL16/PLG	2	geneontology_Biological_Process	Up
GO:0120162	GO:0120162	positive regulation of cold-induced thermogenesis	2/189	97/18866	0.253756	0.449631	0.327345	FABP4/GADD45G	2	geneontology_Biological_Process	Up
GO:0050680	GO:0050680	negative regulation of epithelial cell proliferation	3/189	175/18866	0.256213	0.45359	0.330228	RIDA/RGN/APOH	3	geneontology_Biological_Process	Up
GO:0006835	GO:0006835	dicarboxylic acid transport	2/189	98/18866	0.257469	0.455418	0.331559	AGXT/SLC13A5	2	geneontology_Biological_Process	Up
GO:0000303	GO:0000303	response to superoxide	1/189	30/18866	0.260876	0.457878	0.33335	RGN	1	geneontology_Biological_Process	Up
GO:0034110	GO:0034110	regulation of homotypic cell-cell adhesion	1/189	30/18866	0.260876	0.457878	0.33335	FGG	1	geneontology_Biological_Process	Up
GO:0035666	GO:0035666	TRIF-dependent toll-like receptor signaling pathway	1/189	30/18866	0.260876	0.457878	0.33335	CD14	1	geneontology_Biological_Process	Up
GO:0044788	GO:0044788	modulation by host of viral process	1/189	30/18866	0.260876	0.457878	0.33335	IFI27	1	geneontology_Biological_Process	Up
GO:0045939	GO:0045939	negative regulation of steroid metabolic process	1/189	30/18866	0.260876	0.457878	0.33335	INSIG1	1	geneontology_Biological_Process	Up
GO:0070168	GO:0070168	negative regulation of biomineral tissue development	1/189	30/18866	0.260876	0.457878	0.33335	AHSG	1	geneontology_Biological_Process	Up
GO:0110150	GO:0110150	negative regulation of biomineralization	1/189	30/18866	0.260876	0.457878	0.33335	AHSG	1	geneontology_Biological_Process	Up
GO:0120033	GO:0120033	negative regulation of plasma membrane bounded cell projection assembly	1/189	30/18866	0.260876	0.457878	0.33335	HRG	1	geneontology_Biological_Process	Up
GO:1900746	GO:1900746	regulation of vascular endothelial growth factor signaling pathway	1/189	30/18866	0.260876	0.457878	0.33335	HRG	1	geneontology_Biological_Process	Up
GO:0002702	GO:0002702	positive regulation of production of molecular mediator of immune response	2/189	100/18866	0.264895	0.464135	0.337905	RBP4/HPX	2	geneontology_Biological_Process	Up
GO:0070301	GO:0070301	cellular response to hydrogen peroxide	2/189	100/18866	0.264895	0.464135	0.337905	FABP1/ARG1	2	geneontology_Biological_Process	Up
GO:0001894	GO:0001894	tissue homeostasis	4/189	261/18866	0.266166	0.465962	0.339235	RBP4/AZGP1/MFSD2A/ALB	4	geneontology_Biological_Process	Up
GO:0000305	GO:0000305	response to oxygen radical	1/189	31/18866	0.268292	0.466884	0.339906	RGN	1	geneontology_Biological_Process	Up
GO:0002323	GO:0002323	natural killer cell activation involved in immune response	1/189	31/18866	0.268292	0.466884	0.339906	PGLYRP2	1	geneontology_Biological_Process	Up
GO:0002828	GO:0002828	regulation of type 2 immune response	1/189	31/18866	0.268292	0.466884	0.339906	ARG1	1	geneontology_Biological_Process	Up
GO:0006221	GO:0006221	pyrimidine nucleotide biosynthetic process	1/189	31/18866	0.268292	0.466884	0.339906	UPP2	1	geneontology_Biological_Process	Up
GO:0048710	GO:0048710	regulation of astrocyte differentiation	1/189	31/18866	0.268292	0.466884	0.339906	F2	1	geneontology_Biological_Process	Up
GO:1900745	GO:1900745	positive regulation of p38MAPK cascade	1/189	31/18866	0.268292	0.466884	0.339906	GADD45G	1	geneontology_Biological_Process	Up
GO:1903792	GO:1903792	negative regulation of anion transport	1/189	31/18866	0.268292	0.466884	0.339906	CYP4F2	1	geneontology_Biological_Process	Up
GO:0032637	GO:0032637	interleukin-8 production	2/189	101/18866	0.268609	0.467037	0.340018	CD14/APOA2	2	geneontology_Biological_Process	Up
GO:0110020	GO:0110020	regulation of actomyosin structure organization	2/189	102/18866	0.272323	0.472418	0.343935	APOA1/SERPINF2	2	geneontology_Biological_Process	Up
GO:0045619	GO:0045619	regulation of lymphocyte differentiation	3/189	181/18866	0.272419	0.472418	0.343935	PCK1/IL27/PGLYRP2	3	geneontology_Biological_Process	Up
GO:0071346	GO:0071346	cellular response to interferon-gamma	3/189	182/18866	0.275132	0.472418	0.343935	HPX/CCL16/ARG1	3	geneontology_Biological_Process	Up
GO:0090288	GO:0090288	negative regulation of cellular response to growth factor stimulus	3/189	182/18866	0.275132	0.472418	0.343935	HJV/HRG/TMPRSS6	3	geneontology_Biological_Process	Up
GO:0002724	GO:0002724	regulation of T cell cytokine production	1/189	32/18866	0.275635	0.472418	0.343935	ARG1	1	geneontology_Biological_Process	Up
GO:0010743	GO:0010743	regulation of macrophage derived foam cell differentiation	1/189	32/18866	0.275635	0.472418	0.343935	PLA2G2A	1	geneontology_Biological_Process	Up
GO:0035767	GO:0035767	endothelial cell chemotaxis	1/189	32/18866	0.275635	0.472418	0.343935	HRG	1	geneontology_Biological_Process	Up
GO:0042744	GO:0042744	hydrogen peroxide catabolic process	1/189	32/18866	0.275635	0.472418	0.343935	HP	1	geneontology_Biological_Process	Up
GO:0046475	GO:0046475	glycerophospholipid catabolic process	1/189	32/18866	0.275635	0.472418	0.343935	APOC1	1	geneontology_Biological_Process	Up
GO:0050482	GO:0050482	arachidonic acid secretion	1/189	32/18866	0.275635	0.472418	0.343935	PLA2G2A	1	geneontology_Biological_Process	Up
GO:0051503	GO:0051503	adenine nucleotide transport	1/189	32/18866	0.275635	0.472418	0.343935	SLC25A47	1	geneontology_Biological_Process	Up
GO:0061157	GO:0061157	mRNA destabilization	1/189	32/18866	0.275635	0.472418	0.343935	RIDA	1	geneontology_Biological_Process	Up
GO:0071353	GO:0071353	cellular response to interleukin-4	1/189	32/18866	0.275635	0.472418	0.343935	ARG1	1	geneontology_Biological_Process	Up
GO:0097421	GO:0097421	liver regeneration	1/189	32/18866	0.275635	0.472418	0.343935	RGN	1	geneontology_Biological_Process	Up
GO:0098810	GO:0098810	neurotransmitter reuptake	1/189	32/18866	0.275635	0.472418	0.343935	SLC22A1	1	geneontology_Biological_Process	Up
GO:1902547	GO:1902547	regulation of cellular response to vascular endothelial growth factor stimulus	1/189	32/18866	0.275635	0.472418	0.343935	HRG	1	geneontology_Biological_Process	Up
GO:1903963	GO:1903963	arachidonate transport	1/189	32/18866	0.275635	0.472418	0.343935	PLA2G2A	1	geneontology_Biological_Process	Up
GO:0030593	GO:0030593	neutrophil chemotaxis	2/189	103/18866	0.276036	0.472708	0.344147	CCL16/SAA1	2	geneontology_Biological_Process	Up
GO:0001959	GO:0001959	regulation of cytokine-mediated signaling pathway	3/189	183/18866	0.277847	0.475412	0.346115	HPX/APOA1/ARG1	3	geneontology_Biological_Process	Up
GO:0002456	GO:0002456	T cell mediated immunity	2/189	104/18866	0.279748	0.477863	0.3479	AZGP1/ARG1	2	geneontology_Biological_Process	Up
GO:0032231	GO:0032231	regulation of actin filament bundle assembly	2/189	104/18866	0.279748	0.477863	0.3479	APOA1/SERPINF2	2	geneontology_Biological_Process	Up
GO:0001936	GO:0001936	regulation of endothelial cell proliferation	3/189	184/18866	0.280565	0.478454	0.34833	ANG/APOH/ARG1	3	geneontology_Biological_Process	Up
GO:0046328	GO:0046328	regulation of JNK cascade	3/189	184/18866	0.280565	0.478454	0.34833	AMBP/GADD45G/SERPINF2	3	geneontology_Biological_Process	Up
GO:0003352	GO:0003352	regulation of cilium movement	1/189	33/18866	0.282904	0.478454	0.34833	RGN	1	geneontology_Biological_Process	Up
GO:0006505	GO:0006505	GPI anchor metabolic process	1/189	33/18866	0.282904	0.478454	0.34833	GPLD1	1	geneontology_Biological_Process	Up
GO:0009303	GO:0009303	rRNA transcription	1/189	33/18866	0.282904	0.478454	0.34833	ANG	1	geneontology_Biological_Process	Up
GO:0010039	GO:0010039	response to iron ion	1/189	33/18866	0.282904	0.478454	0.34833	TFR2	1	geneontology_Biological_Process	Up
GO:0010955	GO:0010955	negative regulation of protein processing	1/189	33/18866	0.282904	0.478454	0.34833	SERPINF2	1	geneontology_Biological_Process	Up
GO:0015868	GO:0015868	purine ribonucleotide transport	1/189	33/18866	0.282904	0.478454	0.34833	SLC25A47	1	geneontology_Biological_Process	Up
GO:0033028	GO:0033028	myeloid cell apoptotic process	1/189	33/18866	0.282904	0.478454	0.34833	APOH	1	geneontology_Biological_Process	Up
GO:0035025	GO:0035025	positive regulation of Rho protein signal transduction	1/189	33/18866	0.282904	0.478454	0.34833	APOA1	1	geneontology_Biological_Process	Up
GO:0046627	GO:0046627	negative regulation of insulin receptor signaling pathway	1/189	33/18866	0.282904	0.478454	0.34833	AHSG	1	geneontology_Biological_Process	Up
GO:1903318	GO:1903318	negative regulation of protein maturation	1/189	33/18866	0.282904	0.478454	0.34833	SERPINF2	1	geneontology_Biological_Process	Up
GO:0002824	GO:0002824	positive regulation of adaptive immune response based on somatic recombination of immune receptors built from immunoglobulin superfamily domains	2/189	105/18866	0.283459	0.478996	0.348724	HPX/AZGP1	2	geneontology_Biological_Process	Up
GO:0031348	GO:0031348	negative regulation of defense response	4/189	269/18866	0.283924	0.479386	0.349008	APOA1/F2/SAA1/ARG1	4	geneontology_Biological_Process	Up
GO:0002237	GO:0002237	response to molecule of bacterial origin	5/189	356/18866	0.285915	0.480677	0.349948	PCK1/CD14/CPS1/ARG1/CYP1A2	5	geneontology_Biological_Process	Up
GO:0002708	GO:0002708	positive regulation of lymphocyte mediated immunity	2/189	106/18866	0.287168	0.480677	0.349948	HPX/AZGP1	2	geneontology_Biological_Process	Up
GO:0030038	GO:0030038	contractile actin filament bundle assembly	2/189	106/18866	0.287168	0.480677	0.349948	APOA1/SERPINF2	2	geneontology_Biological_Process	Up
GO:0043149	GO:0043149	stress fiber assembly	2/189	106/18866	0.287168	0.480677	0.349948	APOA1/SERPINF2	2	geneontology_Biological_Process	Up
GO:0002285	GO:0002285	lymphocyte activation involved in immune response	3/189	187/18866	0.288734	0.480677	0.349948	PCK1/IL27/PGLYRP2	3	geneontology_Biological_Process	Up
GO:0050821	GO:0050821	protein stabilization	3/189	187/18866	0.288734	0.480677	0.349948	AFM/APOA1/APOA2	3	geneontology_Biological_Process	Up
GO:0000737	GO:0000737	DNA catabolic process, endonucleolytic	1/189	34/18866	0.2901	0.480677	0.349948	DNASE1L3	1	geneontology_Biological_Process	Up
GO:0002756	GO:0002756	MyD88-independent toll-like receptor signaling pathway	1/189	34/18866	0.2901	0.480677	0.349948	CD14	1	geneontology_Biological_Process	Up
GO:0002888	GO:0002888	positive regulation of myeloid leukocyte mediated immunity	1/189	34/18866	0.2901	0.480677	0.349948	ARG1	1	geneontology_Biological_Process	Up
GO:0006099	GO:0006099	tricarboxylic acid cycle	1/189	34/18866	0.2901	0.480677	0.349948	OGDHL	1	geneontology_Biological_Process	Up
GO:0006658	GO:0006658	phosphatidylserine metabolic process	1/189	34/18866	0.2901	0.480677	0.349948	PLA2G2A	1	geneontology_Biological_Process	Up
GO:0007202	GO:0007202	activation of phospholipase C activity	1/189	34/18866	0.2901	0.480677	0.349948	ANG	1	geneontology_Biological_Process	Up
GO:0009156	GO:0009156	ribonucleoside monophosphate biosynthetic process	1/189	34/18866	0.2901	0.480677	0.349948	UPP2	1	geneontology_Biological_Process	Up
GO:0010765	GO:0010765	positive regulation of sodium ion transport	1/189	34/18866	0.2901	0.480677	0.349948	FXYD1	1	geneontology_Biological_Process	Up
GO:0015865	GO:0015865	purine nucleotide transport	1/189	34/18866	0.2901	0.480677	0.349948	SLC25A47	1	geneontology_Biological_Process	Up
GO:0032148	GO:0032148	activation of protein kinase B activity	1/189	34/18866	0.2901	0.480677	0.349948	ANG	1	geneontology_Biological_Process	Up
GO:0032814	GO:0032814	regulation of natural killer cell activation	1/189	34/18866	0.2901	0.480677	0.349948	PGLYRP2	1	geneontology_Biological_Process	Up
GO:0035633	GO:0035633	maintenance of blood-brain barrier	1/189	34/18866	0.2901	0.480677	0.349948	MFSD2A	1	geneontology_Biological_Process	Up
GO:0035774	GO:0035774	positive regulation of insulin secretion involved in cellular response to glucose stimulus	1/189	34/18866	0.2901	0.480677	0.349948	GPLD1	1	geneontology_Biological_Process	Up
GO:0055022	GO:0055022	negative regulation of cardiac muscle tissue growth	1/189	34/18866	0.2901	0.480677	0.349948	RBP4	1	geneontology_Biological_Process	Up
GO:0061117	GO:0061117	negative regulation of heart growth	1/189	34/18866	0.2901	0.480677	0.349948	RBP4	1	geneontology_Biological_Process	Up
GO:0061384	GO:0061384	heart trabecula morphogenesis	1/189	34/18866	0.2901	0.480677	0.349948	RBP4	1	geneontology_Biological_Process	Up
GO:0070050	GO:0070050	neuron cellular homeostasis	1/189	34/18866	0.2901	0.480677	0.349948	HAAO	1	geneontology_Biological_Process	Up
GO:0010596	GO:0010596	negative regulation of endothelial cell migration	2/189	107/18866	0.290874	0.481179	0.350314	HRG/APOH	2	geneontology_Biological_Process	Up
GO:1903426	GO:1903426	regulation of reactive oxygen species biosynthetic process	2/189	107/18866	0.290874	0.481179	0.350314	RGN/AGXT2	2	geneontology_Biological_Process	Up
GO:0043534	GO:0043534	blood vessel endothelial cell migration	3/189	189/18866	0.29419	0.486173	0.35395	HRG/APOA1/GPLD1	3	geneontology_Biological_Process	Up
GO:0001914	GO:0001914	regulation of T cell mediated cytotoxicity	1/189	35/18866	0.297225	0.486173	0.35395	AZGP1	1	geneontology_Biological_Process	Up
GO:0006739	GO:0006739	NADP metabolic process	1/189	35/18866	0.297225	0.486173	0.35395	DCXR	1	geneontology_Biological_Process	Up
GO:0030262	GO:0030262	apoptotic nuclear changes	1/189	35/18866	0.297225	0.486173	0.35395	DNASE1L3	1	geneontology_Biological_Process	Up
GO:0032633	GO:0032633	interleukin-4 production	1/189	35/18866	0.297225	0.486173	0.35395	ZG16	1	geneontology_Biological_Process	Up
GO:0034390	GO:0034390	smooth muscle cell apoptotic process	1/189	35/18866	0.297225	0.486173	0.35395	APOH	1	geneontology_Biological_Process	Up
GO:0034391	GO:0034391	regulation of smooth muscle cell apoptotic process	1/189	35/18866	0.297225	0.486173	0.35395	APOH	1	geneontology_Biological_Process	Up
GO:0046471	GO:0046471	phosphatidylglycerol metabolic process	1/189	35/18866	0.297225	0.486173	0.35395	PLA2G2A	1	geneontology_Biological_Process	Up
GO:0050779	GO:0050779	RNA destabilization	1/189	35/18866	0.297225	0.486173	0.35395	RIDA	1	geneontology_Biological_Process	Up
GO:0060674	GO:0060674	placenta blood vessel development	1/189	35/18866	0.297225	0.486173	0.35395	PLG	1	geneontology_Biological_Process	Up
GO:0070670	GO:0070670	response to interleukin-4	1/189	35/18866	0.297225	0.486173	0.35395	ARG1	1	geneontology_Biological_Process	Up
GO:0097009	GO:0097009	energy homeostasis	1/189	35/18866	0.297225	0.486173	0.35395	MFSD2A	1	geneontology_Biological_Process	Up
GO:1900016	GO:1900016	negative regulation of cytokine production involved in inflammatory response	1/189	35/18866	0.297225	0.486173	0.35395	F2	1	geneontology_Biological_Process	Up
GO:1900077	GO:1900077	negative regulation of cellular response to insulin stimulus	1/189	35/18866	0.297225	0.486173	0.35395	AHSG	1	geneontology_Biological_Process	Up
GO:0002286	GO:0002286	T cell activation involved in immune response	2/189	109/18866	0.298281	0.487121	0.35464	PCK1/IL27	2	geneontology_Biological_Process	Up
GO:0018958	GO:0018958	phenol-containing compound metabolic process	2/189	109/18866	0.298281	0.487121	0.35464	DAO/CYP2E1	2	geneontology_Biological_Process	Up
GO:0002821	GO:0002821	positive regulation of adaptive immune response	2/189	110/18866	0.30198	0.492337	0.358437	HPX/AZGP1	2	geneontology_Biological_Process	Up
GO:0032680	GO:0032680	regulation of tumor necrosis factor production	2/189	110/18866	0.30198	0.492337	0.358437	CD14/ORM1	2	geneontology_Biological_Process	Up
GO:0050673	GO:0050673	epithelial cell proliferation	6/189	453/18866	0.302198	0.492337	0.358437	ANG/RIDA/RGN/APOA1/APOH/ARG1	6	geneontology_Biological_Process	Up
GO:0002755	GO:0002755	MyD88-dependent toll-like receptor signaling pathway	1/189	36/18866	0.304279	0.492584	0.358617	CD14	1	geneontology_Biological_Process	Up
GO:0006007	GO:0006007	glucose catabolic process	1/189	36/18866	0.304279	0.492584	0.358617	ALDOB	1	geneontology_Biological_Process	Up
GO:0009595	GO:0009595	detection of biotic stimulus	1/189	36/18866	0.304279	0.492584	0.358617	PGLYRP2	1	geneontology_Biological_Process	Up
GO:0033572	GO:0033572	transferrin transport	1/189	36/18866	0.304279	0.492584	0.358617	TFR2	1	geneontology_Biological_Process	Up
GO:0042554	GO:0042554	superoxide anion generation	1/189	36/18866	0.304279	0.492584	0.358617	PON3	1	geneontology_Biological_Process	Up
GO:0045622	GO:0045622	regulation of T-helper cell differentiation	1/189	36/18866	0.304279	0.492584	0.358617	IL27	1	geneontology_Biological_Process	Up
GO:0070873	GO:0070873	regulation of glycogen metabolic process	1/189	36/18866	0.304279	0.492584	0.358617	GCGR	1	geneontology_Biological_Process	Up
GO:0071634	GO:0071634	regulation of transforming growth factor beta production	1/189	36/18866	0.304279	0.492584	0.358617	SERPINF2	1	geneontology_Biological_Process	Up
GO:0051098	GO:0051098	regulation of binding	5/189	367/18866	0.30731	0.497098	0.361903	PON1/CFHR2/CYP2D6/CFHR1/CFHR5	5	geneontology_Biological_Process	Up
GO:0046578	GO:0046578	regulation of Ras protein signal transduction	3/189	194/18866	0.307858	0.49759	0.362262	APOC3/FBP1/APOA1	3	geneontology_Biological_Process	Up
GO:0072562	GO:0072562	blood microparticle	29/193	148/19559	1.48439e-29	1.94455e-27	1.53127e-27	HPR/HP/HPX/SERPINC1/C8A/PON1/A1BG/AMBP/AFM/HRG/ITIH1/KNG1/CFHR3/APOA1/ORM2/PLG/SERPINF2/F2/FGA/ANGPTL4/C4BPA/APOA2/FGG/ORM1/ALB/FGB/AHSG/CFHR1/C9	29	geneontology_Cellular_Component	Up
GO:0034364	GO:0034364	high-density lipoprotein particle	13/193	27/19559	9.93374e-20	5.29412e-18	4.16893e-18	APOC1/HPR/APOC3/APOF/PON1/APOA5/LCAT/APOA1/SAA4/APOA2/SAA1/APOH/SAA2	13	geneontology_Cellular_Component	Up
GO:0034358	GO:0034358	plasma lipoprotein particle	14/193	36/19559	1.61653e-19	5.29412e-18	4.16893e-18	APOC1/HPR/APOC3/APOF/PON1/APOA5/LPA/LCAT/APOA1/SAA4/APOA2/SAA1/APOH/SAA2	14	geneontology_Cellular_Component	Up
GO:1990777	GO:1990777	lipoprotein particle	14/193	36/19559	1.61653e-19	5.29412e-18	4.16893e-18	APOC1/HPR/APOC3/APOF/PON1/APOA5/LPA/LCAT/APOA1/SAA4/APOA2/SAA1/APOH/SAA2	14	geneontology_Cellular_Component	Up
GO:0032994	GO:0032994	protein-lipid complex	14/193	39/19559	6.25988e-19	1.64009e-17	1.29151e-17	APOC1/HPR/APOC3/APOF/PON1/APOA5/LPA/LCAT/APOA1/SAA4/APOA2/SAA1/APOH/SAA2	14	geneontology_Cellular_Component	Up
GO:0062023	GO:0062023	collagen-containing extracellular matrix	27/193	427/19559	1.59312e-14	3.47832e-13	2.73905e-13	ANG/HPX/SERPINC1/APOC3/AZGP1/F9/A1BG/CLEC3B/AMBP/F12/HRG/SPP2/ITIH1/KNG1/APOA1/ORM2/ZG16/PLG/SERPINF2/F2/FGA/ANGPTL4/FGG/ORM1/FGB/APOH/AHSG	27	geneontology_Cellular_Component	Up
GO:0060205	GO:0060205	cytoplasmic vesicle lumen	22/193	326/19559	1.40419e-12	2.59798e-11	2.04582e-11	HP/TTR/A1BG/CLEC3B/ITIH3/HRG/SPP2/KNG1/APOA1/ORM2/ZG16/PLG/SERPINF2/FGA/FGG/ORM1/ALB/FGB/SERPINA4/APOH/ARG1/AHSG	22	geneontology_Cellular_Component	Up
GO:0031983	GO:0031983	vesicle lumen	22/193	328/19559	1.58655e-12	2.59798e-11	2.04582e-11	HP/TTR/A1BG/CLEC3B/ITIH3/HRG/SPP2/KNG1/APOA1/ORM2/ZG16/PLG/SERPINF2/FGA/FGG/ORM1/ALB/FGB/SERPINA4/APOH/ARG1/AHSG	22	geneontology_Cellular_Component	Up
GO:0031093	GO:0031093	platelet alpha granule lumen	12/193	67/19559	2.25607e-12	3.28384e-11	2.58591e-11	A1BG/HRG/KNG1/ORM2/PLG/SERPINF2/FGA/FGG/ORM1/ALB/FGB/AHSG	12	geneontology_Cellular_Component	Up
GO:0034774	GO:0034774	secretory granule lumen	21/193	322/19559	8.95198e-12	1.17271e-10	9.23467e-11	HP/TTR/A1BG/CLEC3B/ITIH3/HRG/SPP2/KNG1/APOA1/ORM2/PLG/SERPINF2/FGA/FGG/ORM1/ALB/FGB/SERPINA4/APOH/ARG1/AHSG	21	geneontology_Cellular_Component	Up
GO:0031091	GO:0031091	platelet alpha granule	12/193	91/19559	9.66022e-11	1.15044e-09	9.05934e-10	A1BG/HRG/KNG1/ORM2/PLG/SERPINF2/FGA/FGG/ORM1/ALB/FGB/AHSG	12	geneontology_Cellular_Component	Up
GO:0042627	GO:0042627	chylomicron	6/193	13/19559	1.38364e-09	1.51047e-08	1.18944e-08	APOC1/APOC3/APOA5/APOA1/APOA2/APOH	6	geneontology_Cellular_Component	Up
GO:0005788	GO:0005788	endoplasmic reticulum lumen	17/193	308/19559	1.16375e-08	1.1727e-07	9.23461e-08	SERPINC1/F9/CES2/APOA5/IL27/SPP2/KNG1/APOA1/SLC27A2/PROZ/F2/FGA/APOA2/FGG/ALB/IGFBP1/AHSG	17	geneontology_Cellular_Component	Up
GO:0034361	GO:0034361	very-low-density lipoprotein particle	6/193	20/19559	2.95051e-08	2.57678e-07	2.02912e-07	APOC1/APOC3/APOA5/APOA1/APOA2/APOH	6	geneontology_Cellular_Component	Up
GO:0034385	GO:0034385	triglyceride-rich plasma lipoprotein particle	6/193	20/19559	2.95051e-08	2.57678e-07	2.02912e-07	APOC1/APOC3/APOA5/APOA1/APOA2/APOH	6	geneontology_Cellular_Component	Up
GO:0031089	GO:0031089	platelet dense granule lumen	5/193	14/19559	1.6544e-07	1.35454e-06	1.06666e-06	CLEC3B/ITIH3/SPP2/SERPINA4/APOH	5	geneontology_Cellular_Component	Up
GO:0005782	GO:0005782	peroxisomal matrix	7/193	52/19559	7.50798e-07	5.46414e-06	4.30282e-06	AGXT/HAO1/DAO/PIPOX/BAAT/HAO2/FABP1	7	geneontology_Cellular_Component	Up
GO:0031907	GO:0031907	microbody lumen	7/193	52/19559	7.50798e-07	5.46414e-06	4.30282e-06	AGXT/HAO1/DAO/PIPOX/BAAT/HAO2/FABP1	7	geneontology_Cellular_Component	Up
GO:0005777	GO:0005777	peroxisome	10/193	137/19559	1.07398e-06	7.03458e-06	5.53949e-06	RIDA/AGXT/HAO1/DAO/PIPOX/SLC27A2/FNDC5/BAAT/HAO2/FABP1	10	geneontology_Cellular_Component	Up
GO:0042579	GO:0042579	microbody	10/193	137/19559	1.07398e-06	7.03458e-06	5.53949e-06	RIDA/AGXT/HAO1/DAO/PIPOX/SLC27A2/FNDC5/BAAT/HAO2/FABP1	10	geneontology_Cellular_Component	Up
GO:0042827	GO:0042827	platelet dense granule	5/193	21/19559	1.58972e-06	9.91684e-06	7.80917e-06	CLEC3B/ITIH3/SPP2/SERPINA4/APOH	5	geneontology_Cellular_Component	Up
GO:0071682	GO:0071682	endocytic vesicle lumen	4/193	20/19559	3.93428e-05	0.000234268	0.000184478	HP/HPX/APOA1/SAA1	4	geneontology_Cellular_Component	Up
GO:0046930	GO:0046930	pore complex	4/193	23/19559	7.02581e-05	0.000400166	0.000315116	C6/C8A/C8B/C9	4	geneontology_Cellular_Component	Up
GO:0005759	GO:0005759	mitochondrial matrix	14/193	473/19559	0.00026461	0.00144433	0.00113736	ACSM2A/RIDA/ACSM2B/GLYAT/PCK2/AGXT/ETNPPL/ACSM5/HMGCS2/OTC/CYP11A1/AGXT2/OGDHL/CPS1	14	geneontology_Cellular_Component	Up
GO:0035580	GO:0035580	specific granule lumen	4/193	62/19559	0.00328117	0.0171933	0.0135391	HP/ORM2/ORM1/ARG1	4	geneontology_Cellular_Component	Up
GO:0034362	GO:0034362	low-density lipoprotein particle	2/193	13/19559	0.00703395	0.0354403	0.027908	APOF/APOA1	2	geneontology_Cellular_Component	Up
GO:0016323	GO:0016323	basolateral plasma membrane	7/193	246/19559	0.011281	0.0547338	0.0431009	SLC27A5/SLC10A1/SLC22A1/SLC51A/AQP9/SLC38A3/SLC22A7	7	geneontology_Cellular_Component	Up
GO:0005796	GO:0005796	Golgi lumen	4/193	103/19559	0.0190621	0.0891835	0.0702289	F9/ZG16/PROZ/F2	4	geneontology_Cellular_Component	Up
GO:0042581	GO:0042581	specific granule	5/193	160/19559	0.0213742	0.0906632	0.0713941	HP/ORM2/SLC27A2/ORM1/ARG1	5	geneontology_Cellular_Component	Up
GO:0005778	GO:0005778	peroxisomal membrane	3/193	60/19559	0.0214546	0.0906632	0.0713941	DAO/SLC27A2/FNDC5	3	geneontology_Cellular_Component	Up
GO:0031903	GO:0031903	microbody membrane	3/193	60/19559	0.0214546	0.0906632	0.0713941	DAO/SLC27A2/FNDC5	3	geneontology_Cellular_Component	Up
GO:0031227	GO:0031227	intrinsic component of endoplasmic reticulum membrane	5/193	166/19559	0.0245813	0.10063	0.0792424	SLC27A5/INSIG1/SLC27A2/HSD11B1/CYP2E1	5	geneontology_Cellular_Component	Up
GO:0005881	GO:0005881	cytoplasmic microtubule	3/193	78/19559	0.0419868	0.166675	0.131251	DCXR/CYP2A6/SAA1	3	geneontology_Cellular_Component	Up
GO:0009897	GO:0009897	external side of plasma membrane	8/193	417/19559	0.0553426	0.213232	0.167912	AZGP1/CD14/TFR2/PLG/F2/FGA/FGG/FGB	8	geneontology_Cellular_Component	Up
GO:0035578	GO:0035578	azurophil granule lumen	3/193	91/19559	0.0611961	0.229048	0.180367	TTR/ORM2/ARG1	3	geneontology_Cellular_Component	Up
GO:0045177	GO:0045177	apical part of cell	8/193	433/19559	0.06589	0.238609	0.187896	SLC22A1/CYP4A11/CYP4F2/ABCB4/SLC38A3/IGFBP2/FABP1/FXYD1	8	geneontology_Cellular_Component	Up
GO:0016324	GO:0016324	apical plasma membrane	7/193	361/19559	0.0673934	0.238609	0.187896	SLC22A1/CYP4A11/CYP4F2/ABCB4/SLC38A3/IGFBP2/FXYD1	7	geneontology_Cellular_Component	Up
GO:0030176	GO:0030176	integral component of endoplasmic reticulum membrane	4/193	158/19559	0.0715458	0.246645	0.194224	SLC27A5/INSIG1/SLC27A2/HSD11B1	4	geneontology_Cellular_Component	Up
GO:0045240	GO:0045240	dihydrolipoyl dehydrogenase complex	1/193	10/19559	0.0944283	0.317182	0.24977	OGDHL	1	geneontology_Cellular_Component	Up
GO:1904724	GO:1904724	tertiary granule lumen	2/193	55/19559	0.102494	0.322412	0.253888	HP/ORM1	2	geneontology_Cellular_Component	Up
GO:0031838	GO:0031838	haptoglobin-hemoglobin complex	1/193	11/19559	0.103369	0.322412	0.253888	HP	1	geneontology_Cellular_Component	Up
GO:0042589	GO:0042589	zymogen granule membrane	1/193	11/19559	0.103369	0.322412	0.253888	ZG16	1	geneontology_Cellular_Component	Up
GO:0005890	GO:0005890	sodium:potassium-exchanging ATPase complex	1/193	12/19559	0.112221	0.341883	0.269221	FXYD1	1	geneontology_Cellular_Component	Up
GO:0005741	GO:0005741	mitochondrial outer membrane	4/193	192/19559	0.122494	0.364699	0.287187	DAO/ARG1/IFI27/PLA2G2A	4	geneontology_Cellular_Component	Up
GO:0045239	GO:0045239	tricarboxylic acid cycle enzyme complex	1/193	14/19559	0.129666	0.377336	0.297139	OGDHL	1	geneontology_Cellular_Component	Up
GO:0005779	GO:0005779	integral component of peroxisomal membrane	1/193	15/19559	0.138261	0.377336	0.297139	SLC27A2	1	geneontology_Cellular_Component	Up
GO:0031231	GO:0031231	intrinsic component of peroxisomal membrane	1/193	15/19559	0.138261	0.377336	0.297139	SLC27A2	1	geneontology_Cellular_Component	Up
GO:0042588	GO:0042588	zymogen granule	1/193	15/19559	0.138261	0.377336	0.297139	ZG16	1	geneontology_Cellular_Component	Up
GO:0090533	GO:0090533	cation-transporting ATPase complex	1/193	18/19559	0.16354	0.436374	0.343629	FXYD1	1	geneontology_Cellular_Component	Up
GO:0031968	GO:0031968	organelle outer membrane	4/193	218/19559	0.169374	0.436374	0.343629	DAO/ARG1/IFI27/PLA2G2A	4	geneontology_Cellular_Component	Up
GO:0031362	GO:0031362	anchored component of external side of plasma membrane	1/193	19/19559	0.171801	0.436374	0.343629	CD14	1	geneontology_Cellular_Component	Up
GO:0019867	GO:0019867	outer membrane	4/193	220/19559	0.173217	0.436374	0.343629	DAO/ARG1/IFI27/PLA2G2A	4	geneontology_Cellular_Component	Up
GO:0036019	GO:0036019	endolysosome	1/193	20/19559	0.179982	0.44486	0.350312	HRG	1	geneontology_Cellular_Component	Up
GO:0097038	GO:0097038	perinuclear endoplasmic reticulum	1/193	22/19559	0.196102	0.462018	0.363823	MOGAT2	1	geneontology_Cellular_Component	Up
GO:0005766	GO:0005766	primary lysosome	3/193	155/19559	0.197504	0.462018	0.363823	TTR/ORM2/ARG1	3	geneontology_Cellular_Component	Up
GO:0042582	GO:0042582	azurophil granule	3/193	155/19559	0.197504	0.462018	0.363823	TTR/ORM2/ARG1	3	geneontology_Cellular_Component	Up
GO:0005791	GO:0005791	rough endoplasmic reticulum	2/193	84/19559	0.20117	0.462337	0.364074	F12/HGFAC	2	geneontology_Cellular_Component	Up
GO:0031233	GO:0031233	intrinsic component of external side of plasma membrane	1/193	24/19559	0.211907	0.470505	0.370506	CD14	1	geneontology_Cellular_Component	Up
GO:0098533	GO:0098533	ATPase dependent transmembrane transport complex	1/193	24/19559	0.211907	0.470505	0.370506	FXYD1	1	geneontology_Cellular_Component	Up
GO:0008395	GO:0008395	steroid hydroxylase activity	12/190	38/18352	2.28748e-15	8.4408e-13	5.46587e-13	CYP2A6/CYP8B1/CYP2C9/CYP2A7/CYP11A1/CYP2C8/CYP2B6/CYP2D6/CYP3A4/CYP7A1/CYP1A2/CYP2E1	12	geneontology_Molecular_Function	Up
GO:0004497	GO:0004497	monooxygenase activity	16/190	101/18352	6.82883e-15	1.25992e-12	8.15865e-13	CYP4A22/CYP4A11/CYP2A6/CYP4F2/CYP8B1/CYP2C9/CYP2A7/CYP11A1/CYP2C8/CYP2B6/CYP2D6/AKR1C4/CYP3A4/CYP7A1/CYP1A2/CYP2E1	16	geneontology_Molecular_Function	Up
GO:0016712	GO:0016712	oxidoreductase activity, acting on paired donors, with incorporation or reduction of molecular oxygen, reduced flavin or flavoprotein as one donor, and incorporation of one atom of oxygen	11/190	35/18352	3.6787e-14	4.5248e-12	2.93005e-12	CYP4A11/CYP2A6/CYP4F2/CYP2C9/CYP2A7/CYP2C8/CYP2B6/CYP2D6/CYP3A4/CYP1A2/CYP2E1	11	geneontology_Molecular_Function	Up
GO:0020037	GO:0020037	heme binding	17/190	138/18352	7.0604e-14	6.51322e-12	4.21766e-12	CYP4A22/CYP4A11/CYP2A6/CYP4F2/AMBP/CYP8B1/HRG/CYP2C9/CYP2A7/CYP11A1/CYP2C8/CYP2B6/CYP2D6/CYP3A4/CYP7A1/CYP1A2/CYP2E1	17	geneontology_Molecular_Function	Up
GO:0008391	GO:0008391	arachidonic acid monooxygenase activity	9/190	20/18352	1.72005e-13	1.2694e-11	8.22003e-12	CYP4A22/CYP4A11/CYP2A6/CYP4F2/CYP2C9/CYP2A7/CYP2C8/CYP2B6/CYP2E1	9	geneontology_Molecular_Function	Up
GO:0046906	GO:0046906	tetrapyrrole binding	17/190	148/18352	2.27882e-13	1.40147e-11	9.0753e-12	CYP4A22/CYP4A11/CYP2A6/CYP4F2/AMBP/CYP8B1/HRG/CYP2C9/CYP2A7/CYP11A1/CYP2C8/CYP2B6/CYP2D6/CYP3A4/CYP7A1/CYP1A2/CYP2E1	17	geneontology_Molecular_Function	Up
GO:0005506	GO:0005506	iron ion binding	17/190	151/18352	3.18227e-13	1.67751e-11	1.08628e-11	CYP4A22/HAAO/CYP4A11/CYP2A6/CYP4F2/CDO1/CYP8B1/CYP2C9/CYP2A7/CYP11A1/CYP2C8/CYP2B6/CYP2D6/CYP3A4/CYP7A1/CYP1A2/CYP2E1	17	geneontology_Molecular_Function	Up
GO:0008392	GO:0008392	arachidonic acid epoxygenase activity	8/190	16/18352	1.36513e-12	6.29664e-11	4.07742e-11	CYP4A11/CYP2A6/CYP4F2/CYP2C9/CYP2A7/CYP2C8/CYP2B6/CYP2E1	8	geneontology_Molecular_Function	Up
GO:0019842	GO:0019842	vitamin binding	16/190	144/18352	1.99578e-12	8.1827e-11	5.29874e-11	RBP4/TAT/AGXT/FTCD/GNMT/SEC14L2/ETNPPL/GPT/AFM/AGXT2/SDS/RBP5/OGDHL/ALB/ADH4/CTH	16	geneontology_Molecular_Function	Up
GO:0016614	GO:0016614	oxidoreductase activity, acting on CH-OH group of donors	15/190	130/18352	5.76774e-12	2.1283e-10	1.37819e-10	DCXR/CYP4A22/LDHD/RDH16/HAO1/ADH1B/HSD17B6/AKR7A3/ADH1C/ADH1A/HAO2/ADH4/AKR1C4/HSD11B1/HSD17B13	15	geneontology_Molecular_Function	Up
GO:0016705	GO:0016705	oxidoreductase activity, acting on paired donors, with incorporation or reduction of molecular oxygen	16/190	162/18352	1.23428e-11	4.14044e-10	2.68116e-10	CYP4A22/CYP4A11/CYP2A6/CYP4F2/CYP8B1/CYP2C9/CYP2A7/CYP11A1/CYP2C8/CYP2B6/CYP2D6/AKR1C4/CYP3A4/CYP7A1/CYP1A2/CYP2E1	16	geneontology_Molecular_Function	Up
GO:0070330	GO:0070330	aromatase activity	8/190	25/18352	1.05938e-10	3.25761e-09	2.10948e-09	CYP4A11/CYP4F2/CYP2C9/CYP2A7/CYP2C8/CYP3A4/CYP1A2/CYP2E1	8	geneontology_Molecular_Function	Up
GO:0005319	GO:0005319	lipid transporter activity	14/190	134/18352	1.16019e-10	3.29317e-09	2.1325e-09	SLC27A5/RBP4/SLC10A1/CFHR4/APOF/SLC51A/FABP4/ABCB4/APOA1/SLC27A2/APOA2/MFSD2A/AKR1C4/FABP1	14	geneontology_Molecular_Function	Up
GO:0016616	GO:0016616	oxidoreductase activity, acting on the CH-OH group of donors, NAD or NADP as acceptor	13/190	120/18352	3.46311e-10	9.12776e-09	5.91072e-09	DCXR/CYP4A22/LDHD/RDH16/ADH1B/HSD17B6/AKR7A3/ADH1C/ADH1A/ADH4/AKR1C4/HSD11B1/HSD17B13	13	geneontology_Molecular_Function	Up
GO:0031406	GO:0031406	carboxylic acid binding	16/190	212/18352	7.00797e-10	1.72396e-08	1.11636e-08	APOC1/TAT/RIDA/PCK1/AGXT/FTCD/GNMT/AFM/FABP4/OTC/DPYS/CPS1/ALB/GSTA1/AKR1C4/FABP1	16	geneontology_Molecular_Function	Up
GO:0043177	GO:0043177	organic acid binding	16/190	224/18352	1.56712e-09	3.61418e-08	2.34038e-08	APOC1/TAT/RIDA/PCK1/AGXT/FTCD/GNMT/AFM/FABP4/OTC/DPYS/CPS1/ALB/GSTA1/AKR1C4/FABP1	16	geneontology_Molecular_Function	Up
GO:0005496	GO:0005496	steroid binding	11/190	106/18352	1.29574e-08	2.81253e-07	1.82126e-07	APOC3/APOF/APOA5/INSIG1/APOA1/APOA2/AKR1C4/FABP1/HSD11B1/CYP3A4/SHBG	11	geneontology_Molecular_Function	Up
GO:0016709	GO:0016709	oxidoreductase activity, acting on paired donors, with incorporation or reduction of molecular oxygen, NAD(P)H as one donor, and incorporation of one atom of oxygen	8/190	45/18352	1.76906e-08	3.62657e-07	2.3484e-07	CYP4A22/CYP4A11/CYP4F2/CYP2C9/AKR1C4/CYP3A4/CYP7A1/CYP2E1	8	geneontology_Molecular_Function	Up
GO:0004745	GO:0004745	retinol dehydrogenase activity	6/190	20/18352	3.90921e-08	7.5921e-07	4.91629e-07	RDH16/ADH1B/HSD17B6/ADH1C/ADH1A/ADH4	6	geneontology_Molecular_Function	Up
GO:0004866	GO:0004866	endopeptidase inhibitor activity	13/190	183/18352	6.00917e-08	1.10869e-06	7.17938e-07	SERPINC1/AMBP/ITIH3/HRG/SPP2/ITIH1/LPA/KNG1/SERPINA11/FETUB/SERPINF2/SERPINA4/AHSG	13	geneontology_Molecular_Function	Up
GO:0030414	GO:0030414	peptidase inhibitor activity	13/190	189/18352	8.7832e-08	1.46762e-06	9.50363e-07	SERPINC1/AMBP/ITIH3/HRG/SPP2/ITIH1/LPA/KNG1/SERPINA11/FETUB/SERPINF2/SERPINA4/AHSG	13	geneontology_Molecular_Function	Up
GO:0030170	GO:0030170	pyridoxal phosphate binding	8/190	55/18352	9.14777e-08	1.46762e-06	9.50363e-07	TAT/AGXT/ETNPPL/GPT/AGXT2/SDS/ALB/CTH	8	geneontology_Molecular_Function	Up
GO:0070279	GO:0070279	vitamin B6 binding	8/190	55/18352	9.14777e-08	1.46762e-06	9.50363e-07	TAT/AGXT/ETNPPL/GPT/AGXT2/SDS/ALB/CTH	8	geneontology_Molecular_Function	Up
GO:0004857	GO:0004857	enzyme inhibitor activity	18/190	383/18352	1.01774e-07	1.55903e-06	1.00955e-06	APOC1/SERPINC1/APOC3/AMBP/ITIH3/HRG/SPP2/ITIH1/LPA/KNG1/SERPINA11/FETUB/APOA1/SERPINF2/ANGPTL4/APOA2/SERPINA4/AHSG	18	geneontology_Molecular_Function	Up
GO:0061135	GO:0061135	endopeptidase regulator activity	13/190	192/18352	1.05625e-07	1.55903e-06	1.00955e-06	SERPINC1/AMBP/ITIH3/HRG/SPP2/ITIH1/LPA/KNG1/SERPINA11/FETUB/SERPINF2/SERPINA4/AHSG	13	geneontology_Molecular_Function	Up
GO:0005504	GO:0005504	fatty acid binding	7/190	39/18352	1.32664e-07	1.88281e-06	1.21922e-06	APOC1/RIDA/AFM/FABP4/ALB/GSTA1/FABP1	7	geneontology_Molecular_Function	Up
GO:0004252	GO:0004252	serine-type endopeptidase activity	12/190	169/18352	1.97626e-07	2.70089e-06	1.74897e-06	HPR/HP/MASP2/F9/F12/KLKB1/LPA/PLG/PROZ/F2/TMPRSS6/HGFAC	12	geneontology_Molecular_Function	Up
GO:0008236	GO:0008236	serine-type peptidase activity	12/190	187/18352	5.89021e-07	7.76246e-06	5.02661e-06	HPR/HP/MASP2/F9/F12/KLKB1/LPA/PLG/PROZ/F2/TMPRSS6/HGFAC	12	geneontology_Molecular_Function	Up
GO:0005324	GO:0005324	long-chain fatty acid transporter activity	5/190	17/18352	6.31203e-07	8.03151e-06	5.20084e-06	SLC27A5/FABP4/SLC27A2/MFSD2A/FABP1	5	geneontology_Molecular_Function	Up
GO:0017171	GO:0017171	serine hydrolase activity	12/190	191/18352	7.38198e-07	9.07983e-06	5.87968e-06	HPR/HP/MASP2/F9/F12/KLKB1/LPA/PLG/PROZ/F2/TMPRSS6/HGFAC	12	geneontology_Molecular_Function	Up
GO:0033293	GO:0033293	monocarboxylic acid binding	8/190	72/18352	7.7397e-07	9.21274e-06	5.96574e-06	APOC1/RIDA/AFM/FABP4/ALB/GSTA1/AKR1C4/FABP1	8	geneontology_Molecular_Function	Up
GO:0061134	GO:0061134	peptidase regulator activity	13/190	229/18352	8.01306e-07	9.24005e-06	5.98343e-06	SERPINC1/AMBP/ITIH3/HRG/SPP2/ITIH1/LPA/KNG1/SERPINA11/FETUB/SERPINF2/SERPINA4/AHSG	13	geneontology_Molecular_Function	Up
GO:0008483	GO:0008483	transaminase activity	5/190	21/18352	2.00698e-06	2.24416e-05	1.45322e-05	TAT/AGXT/ETNPPL/GPT/AGXT2	5	geneontology_Molecular_Function	Up
GO:0016725	GO:0016725	oxidoreductase activity, acting on CH or CH2 groups	4/190	10/18352	2.22659e-06	2.34746e-05	1.52011e-05	CYP2C9/CYP2C8/CYP3A4/CYP1A2	4	geneontology_Molecular_Function	Up
GO:0018455	GO:0018455	alcohol dehydrogenase [NAD(P)+] activity	4/190	10/18352	2.22659e-06	2.34746e-05	1.52011e-05	ADH1B/ADH1C/ADH1A/ADH4	4	geneontology_Molecular_Function	Up
GO:0008028	GO:0008028	monocarboxylic acid transmembrane transporter activity	7/190	59/18352	2.47101e-06	2.53279e-05	1.64012e-05	SLC27A5/SLC10A1/SLC51A/SLC27A2/SLC38A3/MFSD2A/AKR1C4	7	geneontology_Molecular_Function	Up
GO:0015645	GO:0015645	fatty acid ligase activity	5/190	22/18352	2.57551e-06	2.56855e-05	1.66327e-05	SLC27A5/ACSM2A/ACSM2B/ACSM5/SLC27A2	5	geneontology_Molecular_Function	Up
GO:0043178	GO:0043178	alcohol binding	8/190	86/18352	3.03277e-06	2.94498e-05	1.90703e-05	RBP4/APOC3/APOF/APOA5/APOA1/RBP5/APOA2/ADH4	8	geneontology_Molecular_Function	Up
GO:0016769	GO:0016769	transferase activity, transferring nitrogenous groups	5/190	23/18352	3.26337e-06	3.08765e-05	1.99942e-05	TAT/AGXT/ETNPPL/GPT/AGXT2	5	geneontology_Molecular_Function	Up
GO:1901681	GO:1901681	sulfur compound binding	13/190	262/18352	3.58272e-06	3.30506e-05	2.14021e-05	ANG/SERPINC1/CLEC3B/APOA5/GNMT/HRG/LPA/KNG1/F2/OGDHL/ACOT12/SAA1/APOH	13	geneontology_Molecular_Function	Up
GO:0005539	GO:0005539	glycosaminoglycan binding	12/190	232/18352	5.61397e-06	5.05257e-05	3.27181e-05	ANG/SERPINC1/CLEC3B/APOA5/HRG/LPA/KNG1/ZG16/F2/PGLYRP2/SAA1/APOH	12	geneontology_Molecular_Function	Up
GO:0016405	GO:0016405	CoA-ligase activity	5/190	26/18352	6.22065e-06	5.46528e-05	3.53907e-05	SLC27A5/ACSM2A/ACSM2B/ACSM5/SLC27A2	5	geneontology_Molecular_Function	Up
GO:0004867	GO:0004867	serine-type endopeptidase inhibitor activity	8/190	98/18352	8.09259e-06	6.94457e-05	4.49699e-05	SERPINC1/AMBP/ITIH3/HRG/ITIH1/SERPINA11/SERPINF2/SERPINA4	8	geneontology_Molecular_Function	Up
GO:1901618	GO:1901618	organic hydroxy compound transmembrane transporter activity	6/190	48/18352	9.72778e-06	8.15807e-05	5.28279e-05	RBP4/SLC10A1/SLC22A1/SLC51A/AQP9/AKR1C4	6	geneontology_Molecular_Function	Up
GO:0008201	GO:0008201	heparin binding	10/190	169/18352	1.07425e-05	8.80881e-05	5.70418e-05	ANG/SERPINC1/CLEC3B/APOA5/HRG/LPA/KNG1/F2/SAA1/APOH	10	geneontology_Molecular_Function	Up
GO:0016878	GO:0016878	acid-thiol ligase activity	5/190	30/18352	1.30311e-05	0.000104532	6.76904e-05	SLC27A5/ACSM2A/ACSM2B/ACSM5/SLC27A2	5	geneontology_Molecular_Function	Up
GO:0003996	GO:0003996	acyl-CoA ligase activity	4/190	16/18352	1.83792e-05	0.000144297	9.34397e-05	ACSM2A/ACSM2B/ACSM5/SLC27A2	4	geneontology_Molecular_Function	Up
GO:0016229	GO:0016229	steroid dehydrogenase activity	5/190	34/18352	2.46044e-05	0.000189147	0.000122483	RDH16/HSD17B6/AKR1C4/HSD11B1/HSD17B13	5	geneontology_Molecular_Function	Up
GO:0055102	GO:0055102	lipase inhibitor activity	4/190	18/18352	3.0404e-05	0.000228227	0.000147789	APOC1/APOC3/APOA1/APOA2	4	geneontology_Molecular_Function	Up
GO:0008514	GO:0008514	organic anion transmembrane transporter activity	11/190	233/18352	3.23691e-05	0.000228227	0.000147789	SLC27A5/SLC10A1/SLC51A/SLC13A5/AQP9/SLC25A47/SLC27A2/SLC38A3/MFSD2A/AKR1C4/SLC22A7	11	geneontology_Molecular_Function	Up
GO:0016597	GO:0016597	amino acid binding	6/190	59/18352	3.25021e-05	0.000228227	0.000147789	TAT/AGXT/GNMT/OTC/DPYS/CPS1	6	geneontology_Molecular_Function	Up
GO:0032934	GO:0032934	sterol binding	6/190	59/18352	3.25021e-05	0.000228227	0.000147789	APOC3/APOF/APOA5/INSIG1/APOA1/APOA2	6	geneontology_Molecular_Function	Up
GO:0019825	GO:0019825	oxygen binding	5/190	36/18352	3.27805e-05	0.000228227	0.000147789	CYP8B1/CYP2A7/ALB/CYP3A4/CYP2E1	5	geneontology_Molecular_Function	Up
GO:0046943	GO:0046943	carboxylic acid transmembrane transporter activity	9/190	162/18352	4.89812e-05	0.000334705	0.000216739	SLC27A5/SLC10A1/SLC51A/SLC13A5/AQP9/SLC27A2/SLC38A3/MFSD2A/AKR1C4	9	geneontology_Molecular_Function	Up
GO:0005342	GO:0005342	organic acid transmembrane transporter activity	9/190	163/18352	5.1387e-05	0.00034476	0.000223251	SLC27A5/SLC10A1/SLC51A/SLC13A5/AQP9/SLC27A2/SLC38A3/MFSD2A/AKR1C4	9	geneontology_Molecular_Function	Up
GO:0016877	GO:0016877	ligase activity, forming carbon-sulfur bonds	5/190	40/18352	5.5329e-05	0.000364579	0.000236084	SLC27A5/ACSM2A/ACSM2B/ACSM5/SLC27A2	5	geneontology_Molecular_Function	Up
GO:0016903	GO:0016903	oxidoreductase activity, acting on the aldehyde or oxo group of donors	5/190	43/18352	7.89321e-05	0.000510981	0.000330888	ALDH8A1/OGDHL/ADH4/ALDH1L1/AKR1C4	5	geneontology_Molecular_Function	Up
GO:0008509	GO:0008509	anion transmembrane transporter activity	13/190	357/18352	9.23737e-05	0.000587688	0.000380559	SLC27A5/SLC10A1/SLC22A1/SLC51A/SLC13A5/AQP9/SLC25A47/SLC27A2/SLC38A3/MFSD2A/AKR1C4/SLC22A7/FXYD1	13	geneontology_Molecular_Function	Up
GO:0016702	GO:0016702	oxidoreductase activity, acting on single donors with incorporation of molecular oxygen, incorporation of two atoms of oxygen	4/190	25/18352	0.000118761	0.000742756	0.000480975	HPD/HAAO/CDO1/HGD	4	geneontology_Molecular_Function	Up
GO:0052689	GO:0052689	carboxylic ester hydrolase activity	8/190	143/18352	0.000123052	0.000751587	0.000486693	PON1/CES2/PON3/RGN/LCAT/BAAT/ACOT12/PLA2G2A	8	geneontology_Molecular_Function	Up
GO:0047760	GO:0047760	butyrate-CoA ligase activity	3/190	10/18352	0.000124246	0.000751587	0.000486693	ACSM2A/ACSM2B/ACSM5	3	geneontology_Molecular_Function	Up
GO:0016701	GO:0016701	oxidoreductase activity, acting on single donors with incorporation of molecular oxygen	4/190	26/18352	0.000139222	0.000815445	0.000528045	HPD/HAAO/CDO1/HGD	4	geneontology_Molecular_Function	Up
GO:0070325	GO:0070325	lipoprotein particle receptor binding	4/190	26/18352	0.000139222	0.000815445	0.000528045	APOC3/APOA5/APOA1/APOA2	4	geneontology_Molecular_Function	Up
GO:0015485	GO:0015485	cholesterol binding	5/190	49/18352	0.000148706	0.000857381	0.000555201	APOC3/APOF/APOA5/APOA1/APOA2	5	geneontology_Molecular_Function	Up
GO:0031210	GO:0031210	phosphatidylcholine binding	4/190	29/18352	0.000215881	0.00120697	0.000781579	APOC1/APOA5/APOA1/APOA2	4	geneontology_Molecular_Function	Up
GO:0050997	GO:0050997	quaternary ammonium group binding	4/190	29/18352	0.000215881	0.00120697	0.000781579	APOC1/APOA5/APOA1/APOA2	4	geneontology_Molecular_Function	Up
GO:0033764	GO:0033764	steroid dehydrogenase activity, acting on the CH-OH group of donors, NAD or NADP as acceptor	4/190	30/18352	0.000247089	0.00136083	0.000881212	RDH16/HSD17B6/AKR1C4/HSD11B1	4	geneontology_Molecular_Function	Up
GO:0016620	GO:0016620	oxidoreductase activity, acting on the aldehyde or oxo group of donors, NAD or NADP as acceptor	4/190	35/18352	0.000453411	0.00246042	0.00159326	ALDH8A1/ADH4/ALDH1L1/AKR1C4	4	geneontology_Molecular_Function	Up
GO:0019841	GO:0019841	retinol binding	3/190	16/18352	0.000553842	0.00296185	0.00191796	RBP4/RBP5/ADH4	3	geneontology_Molecular_Function	Up
GO:0016918	GO:0016918	retinal binding	3/190	17/18352	0.000667414	0.00346867	0.00224615	RBP4/RBP5/ADH4	3	geneontology_Molecular_Function	Up
GO:0034185	GO:0034185	apolipoprotein binding	3/190	17/18352	0.000667414	0.00346867	0.00224615	LPA/LCAT/PLG	3	geneontology_Molecular_Function	Up
GO:0004175	GO:0004175	endopeptidase activity	13/190	440/18352	0.000692901	0.00355112	0.00229954	HPR/HP/MASP2/F9/F12/KLKB1/LPA/PLG/PROZ/F2/TMPRSS6/CPS1/HGFAC	13	geneontology_Molecular_Function	Up
GO:0016829	GO:0016829	lyase activity	8/190	189/18352	0.000804762	0.00406791	0.00263419	PCK1/PCK2/ALDOB/FTCD/ETNPPL/SDS/UROC1/CTH	8	geneontology_Molecular_Function	Up
GO:0015370	GO:0015370	solute:sodium symporter activity	5/190	72/18352	0.000900641	0.00449103	0.00290819	SLC10A1/SLC22A1/SLC13A5/MFSD2A/SLC28A1	5	geneontology_Molecular_Function	Up
GO:0005543	GO:0005543	phospholipid binding	13/190	454/18352	0.000923555	0.00454389	0.00294241	APOC1/APOC3/PON1/APOA5/SEC14L2/ANXA10/APOA1/OTC/APOA2/CPS1/APOH/FABP1/PLA2G2A	13	geneontology_Molecular_Function	Up
GO:0015125	GO:0015125	bile acid transmembrane transporter activity	3/190	19/18352	0.000936682	0.00454784	0.00294497	SLC10A1/SLC51A/AKR1C4	3	geneontology_Molecular_Function	Up
GO:0009055	GO:0009055	electron transfer activity	6/190	111/18352	0.00104797	0.00502206	0.00325206	HAAO/RDH16/HSD17B6/AKR7A3/AKR1C4/CYP1A2	6	geneontology_Molecular_Function	Up
GO:0016408	GO:0016408	C-acyltransferase activity	3/190	20/18352	0.00109362	0.00517366	0.00335023	ACSM2A/ACSM2B/ACSM5	3	geneontology_Molecular_Function	Up
GO:0016746	GO:0016746	transferase activity, transferring acyl groups	9/190	259/18352	0.00154828	0.00723184	0.004683	ACSM2A/ACSM2B/GLYATL1/GLYAT/ACSM5/MOGAT2/LCAT/HMGCS2/BAAT	9	geneontology_Molecular_Function	Up
GO:0004033	GO:0004033	aldo-keto reductase (NADP) activity	3/190	27/18352	0.00266064	0.0122722	0.00794691	AKR7A3/ADH4/AKR1C4	3	geneontology_Molecular_Function	Up
GO:0016747	GO:0016747	transferase activity, transferring acyl groups other than amino-acyl groups	8/190	229/18352	0.00270931	0.0123424	0.00799237	ACSM2A/ACSM2B/GLYATL1/GLYAT/ACSM5/MOGAT2/LCAT/BAAT	8	geneontology_Molecular_Function	Up
GO:0004869	GO:0004869	cysteine-type endopeptidase inhibitor activity	4/190	59/18352	0.00324991	0.0146246	0.00947022	HRG/KNG1/FETUB/AHSG	4	geneontology_Molecular_Function	Up
GO:0015294	GO:0015294	solute:cation symporter activity	5/190	98/18352	0.00352351	0.0156648	0.0101438	SLC10A1/SLC22A1/SLC13A5/MFSD2A/SLC28A1	5	geneontology_Molecular_Function	Up
GO:0015293	GO:0015293	symporter activity	6/190	143/18352	0.00376886	0.0165561	0.0107209	SLC10A1/SLC22A1/SLC13A5/SLC38A3/MFSD2A/SLC28A1	6	geneontology_Molecular_Function	Up
GO:0008144	GO:0008144	drug binding	5/190	104/18352	0.00454066	0.0186263	0.0120615	CYP2C9/CYP2D6/ALB/NR1I2/FABP1	5	geneontology_Molecular_Function	Up
GO:0008401	GO:0008401	retinoic acid 4-hydroxylase activity	2/190	10/18352	0.00454299	0.0186263	0.0120615	CYP2C8/CYP3A4	2	geneontology_Molecular_Function	Up
GO:0015651	GO:0015651	quaternary ammonium group transmembrane transporter activity	2/190	10/18352	0.00454299	0.0186263	0.0120615	SLC22A1/SLC25A47	2	geneontology_Molecular_Function	Up
GO:0019203	GO:0019203	carbohydrate phosphatase activity	2/190	10/18352	0.00454299	0.0186263	0.0120615	PFKFB1/FBP1	2	geneontology_Molecular_Function	Up
GO:0032052	GO:0032052	bile acid binding	2/190	10/18352	0.00454299	0.0186263	0.0120615	AKR1C4/FABP1	2	geneontology_Molecular_Function	Up
GO:0050308	GO:0050308	sugar-phosphatase activity	2/190	10/18352	0.00454299	0.0186263	0.0120615	PFKFB1/FBP1	2	geneontology_Molecular_Function	Up
GO:1901474	GO:1901474	azole transmembrane transporter activity	2/190	11/18352	0.00551487	0.0223625	0.0144809	SLC38A3/SLC28A1	2	geneontology_Molecular_Function	Up
GO:0005501	GO:0005501	retinoid binding	3/190	36/18352	0.00606702	0.024334	0.0157576	RBP4/RBP5/ADH4	3	geneontology_Molecular_Function	Up
GO:0019840	GO:0019840	isoprenoid binding	3/190	37/18352	0.00655269	0.0255308	0.0165326	RBP4/RBP5/ADH4	3	geneontology_Molecular_Function	Up
GO:0004032	GO:0004032	alditol:NADP+ 1-oxidoreductase activity	2/190	12/18352	0.00657297	0.0255308	0.0165326	ADH4/AKR1C4	2	geneontology_Molecular_Function	Up
GO:0005542	GO:0005542	folic acid binding	2/190	12/18352	0.00657297	0.0255308	0.0165326	FTCD/GNMT	2	geneontology_Molecular_Function	Up
GO:0016874	GO:0016874	ligase activity	6/190	165/18352	0.00749512	0.0287576	0.0186221	SLC27A5/ACSM2A/ACSM2B/ACSM5/SLC27A2/CPS1	6	geneontology_Molecular_Function	Up
GO:0004467	GO:0004467	long-chain fatty acid-CoA ligase activity	2/190	13/18352	0.00771544	0.0287576	0.0186221	SLC27A5/SLC27A2	2	geneontology_Molecular_Function	Up
GO:0016840	GO:0016840	carbon-nitrogen lyase activity	2/190	13/18352	0.00771544	0.0287576	0.0186221	FTCD/SDS	2	geneontology_Molecular_Function	Up
GO:0031994	GO:0031994	insulin-like growth factor I binding	2/190	13/18352	0.00771544	0.0287576	0.0186221	IGFBP2/IGFBP1	2	geneontology_Molecular_Function	Up
GO:0016810	GO:0016810	hydrolase activity, acting on carbon-nitrogen (but not peptide) bonds	5/190	121/18352	0.0085328	0.031486	0.0203889	AMDHD1/UPB1/DPYS/PGLYRP2/ARG1	5	geneontology_Molecular_Function	Up
GO:0060229	GO:0060229	lipase activator activity	2/190	14/18352	0.00894043	0.0326635	0.0211514	APOA5/APOH	2	geneontology_Molecular_Function	Up
GO:0036041	GO:0036041	long-chain fatty acid binding	2/190	15/18352	0.0102461	0.0370668	0.0240028	RIDA/FABP4	2	geneontology_Molecular_Function	Up
GO:0004030	GO:0004030	aldehyde dehydrogenase [NAD(P)+] activity	2/190	16/18352	0.0116307	0.0404912	0.0262203	ADH4/ALDH1L1	2	geneontology_Molecular_Function	Up
GO:0008035	GO:0008035	high-density lipoprotein particle binding	2/190	16/18352	0.0116307	0.0404912	0.0262203	APOA1/APOA2	2	geneontology_Molecular_Function	Up
GO:0010181	GO:0010181	FMN binding	2/190	16/18352	0.0116307	0.0404912	0.0262203	HAO1/HAO2	2	geneontology_Molecular_Function	Up
GO:0015291	GO:0015291	secondary active transmembrane transporter activity	7/190	236/18352	0.0116316	0.0404912	0.0262203	SLC10A1/SLC22A1/SLC13A5/SLC38A3/MFSD2A/SLC22A7/SLC28A1	7	geneontology_Molecular_Function	Up
GO:0016209	GO:0016209	antioxidant activity	4/190	86/18352	0.0122292	0.0421736	0.0273097	HP/ALB/GSTA1/FABP1	4	geneontology_Molecular_Function	Up
GO:0016894	GO:0016894	endonuclease activity, active with either ribo- or deoxyribonucleic acids and producing 3'-phosphomonoesters	2/190	18/18352	0.0146297	0.0495263	0.0320709	RNASE4/RIDA	2	geneontology_Molecular_Function	Up
GO:0042834	GO:0042834	peptidoglycan binding	2/190	18/18352	0.0146297	0.0495263	0.0320709	ZG16/PGLYRP2	2	geneontology_Molecular_Function	Up
GO:0051213	GO:0051213	dioxygenase activity	4/190	91/18352	0.0147938	0.0496266	0.0321359	HPD/HAAO/CDO1/HGD	4	geneontology_Molecular_Function	Up
GO:0016830	GO:0016830	carbon-carbon lyase activity	3/190	51/18352	0.0158074	0.0520798	0.0337245	PCK1/PCK2/ALDOB	3	geneontology_Molecular_Function	Up
GO:0042887	GO:0042887	amide transmembrane transporter activity	3/190	51/18352	0.0158074	0.0520798	0.0337245	AZGP1/AQP9/SLC38A3	3	geneontology_Molecular_Function	Up
GO:0016638	GO:0016638	oxidoreductase activity, acting on the CH-NH2 group of donors	2/190	20/18352	0.0179237	0.0575116	0.0372418	ASPDH/DAO	2	geneontology_Molecular_Function	Up
GO:0047617	GO:0047617	acyl-CoA hydrolase activity	2/190	20/18352	0.0179237	0.0575116	0.0372418	BAAT/ACOT12	2	geneontology_Molecular_Function	Up
GO:0120020	GO:0120020	cholesterol transfer activity	2/190	20/18352	0.0179237	0.0575116	0.0372418	APOA1/APOA2	2	geneontology_Molecular_Function	Up
GO:0001848	GO:0001848	complement binding	2/190	21/18352	0.0196771	0.0615326	0.0398456	MASP2/C8A	2	geneontology_Molecular_Function	Up
GO:0008106	GO:0008106	alcohol dehydrogenase (NADP+) activity	2/190	21/18352	0.0196771	0.0615326	0.0398456	ADH4/AKR1C4	2	geneontology_Molecular_Function	Up
GO:0120015	GO:0120015	sterol transfer activity	2/190	21/18352	0.0196771	0.0615326	0.0398456	APOA1/APOA2	2	geneontology_Molecular_Function	Up
GO:0015081	GO:0015081	sodium ion transmembrane transporter activity	5/190	152/18352	0.0210703	0.0653356	0.0423083	SLC10A1/SLC22A1/SLC13A5/MFSD2A/SLC28A1	5	geneontology_Molecular_Function	Up
GO:0016289	GO:0016289	CoA hydrolase activity	2/190	22/18352	0.0214993	0.0661103	0.04281	BAAT/ACOT12	2	geneontology_Molecular_Function	Up
GO:0038187	GO:0038187	pattern recognition receptor activity	2/190	23/18352	0.0233887	0.0713258	0.0461873	CD14/PGLYRP2	2	geneontology_Molecular_Function	Up
GO:0015101	GO:0015101	organic cation transmembrane transporter activity	2/190	24/18352	0.0253437	0.0748379	0.0484615	SLC22A1/SLC25A47	2	geneontology_Molecular_Function	Up
GO:0019865	GO:0019865	immunoglobulin binding	2/190	24/18352	0.0253437	0.0748379	0.0484615	AMBP/HRG	2	geneontology_Molecular_Function	Up
GO:0016655	GO:0016655	oxidoreductase activity, acting on NAD(P)H, quinone or similar compound as acceptor	3/190	61/18352	0.0253516	0.0748379	0.0484615	DCXR/ADH4/AKR1C4	3	geneontology_Molecular_Function	Up
GO:1901505	GO:1901505	carbohydrate derivative transmembrane transporter activity	3/190	61/18352	0.0253516	0.0748379	0.0484615	SLC25A47/MFSD2A/SLC28A1	3	geneontology_Molecular_Function	Up
GO:0022804	GO:0022804	active transmembrane transporter activity	8/190	344/18352	0.0271496	0.0795094	0.0514866	SLC10A1/SLC22A1/SLC13A5/ABCB4/SLC38A3/MFSD2A/SLC22A7/SLC28A1	8	geneontology_Molecular_Function	Up
GO:0030145	GO:0030145	manganese ion binding	3/190	64/18352	0.0287	0.0833883	0.0539984	PCK1/PCK2/ARG1	3	geneontology_Molecular_Function	Up
GO:0008198	GO:0008198	ferrous iron binding	2/190	26/18352	0.0294444	0.0848828	0.0549662	HAAO/CDO1	2	geneontology_Molecular_Function	Up
GO:0022853	GO:0022853	active ion transmembrane transporter activity	6/190	229/18352	0.0322028	0.092115	0.0596494	SLC10A1/SLC22A1/SLC13A5/MFSD2A/SLC22A7/SLC28A1	6	geneontology_Molecular_Function	Up
GO:0016645	GO:0016645	oxidoreductase activity, acting on the CH-NH group of donors	2/190	28/18352	0.0337894	0.09591	0.0621069	PIPOX/ALDH1L1	2	geneontology_Molecular_Function	Up
GO:0004540	GO:0004540	ribonuclease activity	4/190	118/18352	0.0343422	0.096735	0.0626412	RNASE4/ANG/RIDA/AZGP1	4	geneontology_Molecular_Function	Up
GO:0004806	GO:0004806	triglyceride lipase activity	2/190	29/18352	0.0360499	0.100018	0.064767	CES2/LCAT	2	geneontology_Molecular_Function	Up
GO:0005520	GO:0005520	insulin-like growth factor binding	2/190	29/18352	0.0360499	0.100018	0.064767	IGFBP2/IGFBP1	2	geneontology_Molecular_Function	Up
GO:0005343	GO:0005343	organic acid:sodium symporter activity	2/190	30/18352	0.038367	0.105652	0.0684156	SLC10A1/SLC13A5	2	geneontology_Molecular_Function	Up
GO:0004519	GO:0004519	endonuclease activity	4/190	127/18352	0.0431074	0.117119	0.0758408	RNASE4/ANG/RIDA/DNASE1L3	4	geneontology_Molecular_Function	Up
GO:0015020	GO:0015020	glucuronosyltransferase activity	2/190	32/18352	0.0431658	0.117119	0.0758408	UGT2B7/UGT2B15	2	geneontology_Molecular_Function	Up
GO:0001530	GO:0001530	lipopolysaccharide binding	2/190	33/18352	0.0456447	0.121172	0.0784653	CD14/F2	2	geneontology_Molecular_Function	Up
GO:0015248	GO:0015248	sterol transporter activity	2/190	33/18352	0.0456447	0.121172	0.0784653	APOA1/APOA2	2	geneontology_Molecular_Function	Up
GO:0071949	GO:0071949	FAD binding	2/190	33/18352	0.0456447	0.121172	0.0784653	LDHD/DAO	2	geneontology_Molecular_Function	Up
GO:0016298	GO:0016298	lipase activity	4/190	130/18352	0.0462839	0.121991	0.0789959	CES2/LCAT/GPLD1/PLA2G2A	4	geneontology_Molecular_Function	Up
GO:0071813	GO:0071813	lipoprotein particle binding	2/190	34/18352	0.0481749	0.125187	0.0810652	APOA1/APOA2	2	geneontology_Molecular_Function	Up
GO:0071814	GO:0071814	protein-lipid complex binding	2/190	34/18352	0.0481749	0.125187	0.0810652	APOA1/APOA2	2	geneontology_Molecular_Function	Up
GO:0016831	GO:0016831	carboxy-lyase activity	2/190	35/18352	0.0507549	0.130969	0.0848095	PCK1/PCK2	2	geneontology_Molecular_Function	Up
GO:0042562	GO:0042562	hormone binding	3/190	84/18352	0.0566078	0.145057	0.0939325	TTR/GCGR/SHBG	3	geneontology_Molecular_Function	Up
GO:0015605	GO:0015605	organophosphate ester transmembrane transporter activity	2/190	38/18352	0.0587818	0.14959	0.0968674	SLC25A47/MFSD2A	2	geneontology_Molecular_Function	Up
GO:0008194	GO:0008194	UDP-glycosyltransferase activity	4/190	144/18352	0.0627813	0.158673	0.102749	GYS2/UGT2B10/UGT2B7/UGT2B15	4	geneontology_Molecular_Function	Up
GO:0016790	GO:0016790	thiolester hydrolase activity	2/190	40/18352	0.0643596	0.160464	0.103909	BAAT/ACOT12	2	geneontology_Molecular_Function	Up
GO:0017080	GO:0017080	sodium channel regulator activity	2/190	40/18352	0.0643596	0.160464	0.103909	GPLD1/FXYD1	2	geneontology_Molecular_Function	Up
GO:0072341	GO:0072341	modified amino acid binding	3/190	90/18352	0.0667855	0.165395	0.107102	FTCD/GNMT/CPS1	3	geneontology_Molecular_Function	Up
GO:0004518	GO:0004518	nuclease activity	5/190	210/18352	0.0676118	0.166325	0.107704	RNASE4/ANG/RIDA/AZGP1/DNASE1L3	5	geneontology_Molecular_Function	Up
GO:0120013	GO:0120013	lipid transfer activity	2/190	42/18352	0.0701072	0.171322	0.11094	APOA1/APOA2	2	geneontology_Molecular_Function	Up
GO:0005548	GO:0005548	phospholipid transporter activity	2/190	48/18352	0.0882783	0.214307	0.138775	ABCB4/MFSD2A	2	geneontology_Molecular_Function	Up
GO:0016741	GO:0016741	transferase activity, transferring one-carbon groups	5/190	229/18352	0.089942	0.216919	0.140467	FTCD/GNMT/OTC/BHMT/ALDH1L1	5	geneontology_Molecular_Function	Up
GO:0051087	GO:0051087	chaperone binding	3/190	104/18352	0.0934641	0.220577	0.142835	PLG/ALB/FGB	3	geneontology_Molecular_Function	Up
GO:0008374	GO:0008374	O-acyltransferase activity	2/190	50/18352	0.0946158	0.220577	0.142835	MOGAT2/LCAT	2	geneontology_Molecular_Function	Up
GO:0015173	GO:0015173	aromatic amino acid transmembrane transporter activity	1/190	10/18352	0.0988615	0.220577	0.142835	SLC38A3	1	geneontology_Molecular_Function	Up
GO:0016595	GO:0016595	glutamate binding	1/190	10/18352	0.0988615	0.220577	0.142835	CPS1	1	geneontology_Molecular_Function	Up
GO:0016884	GO:0016884	carbon-nitrogen ligase activity, with glutamine as amido-N-donor	1/190	10/18352	0.0988615	0.220577	0.142835	CPS1	1	geneontology_Molecular_Function	Up
GO:0071723	GO:0071723	lipopeptide binding	1/190	10/18352	0.0988615	0.220577	0.142835	CD14	1	geneontology_Molecular_Function	Up
GO:0102391	GO:0102391	decanoate-CoA ligase activity	1/190	10/18352	0.0988615	0.220577	0.142835	SLC27A2	1	geneontology_Molecular_Function	Up
GO:0016410	GO:0016410	N-acyltransferase activity	3/190	107/18352	0.0996754	0.220577	0.142835	GLYATL1/GLYAT/BAAT	3	geneontology_Molecular_Function	Up
GO:0004879	GO:0004879	nuclear receptor activity	2/190	52/18352	0.10108	0.220577	0.142835	NR1I3/NR1I2	2	geneontology_Molecular_Function	Up
GO:0098531	GO:0098531	ligand-activated transcription factor activity	2/190	52/18352	0.10108	0.220577	0.142835	NR1I3/NR1I2	2	geneontology_Molecular_Function	Up
GO:0033218	GO:0033218	amide binding	7/190	381/18352	0.101695	0.220577	0.142835	ANG/CD14/FTCD/GNMT/APOA1/GCGR/ACOT12	7	geneontology_Molecular_Function	Up
GO:0016651	GO:0016651	oxidoreductase activity, acting on NAD(P)H	3/190	109/18352	0.103907	0.220577	0.142835	DCXR/ADH4/AKR1C4	3	geneontology_Molecular_Function	Up
GO:0015932	GO:0015932	nucleobase-containing compound transmembrane transporter activity	2/190	54/18352	0.107662	0.220577	0.142835	SLC25A47/SLC28A1	2	geneontology_Molecular_Function	Up
GO:0050661	GO:0050661	NADP binding	2/190	54/18352	0.107662	0.220577	0.142835	ASPDH/HSD11B1	2	geneontology_Molecular_Function	Up
GO:0005436	GO:0005436	sodium:phosphate symporter activity	1/190	11/18352	0.108196	0.220577	0.142835	MFSD2A	1	geneontology_Molecular_Function	Up
GO:0005527	GO:0005527	macrolide binding	1/190	11/18352	0.108196	0.220577	0.142835	ALB	1	geneontology_Molecular_Function	Up
GO:0008525	GO:0008525	phosphatidylcholine transporter activity	1/190	11/18352	0.108196	0.220577	0.142835	ABCB4	1	geneontology_Molecular_Function	Up
GO:0015166	GO:0015166	polyol transmembrane transporter activity	1/190	11/18352	0.108196	0.220577	0.142835	AQP9	1	geneontology_Molecular_Function	Up
GO:0015378	GO:0015378	sodium:chloride symporter activity	1/190	11/18352	0.108196	0.220577	0.142835	SLC22A1	1	geneontology_Molecular_Function	Up
GO:0015643	GO:0015643	toxic substance binding	1/190	11/18352	0.108196	0.220577	0.142835	ALB	1	geneontology_Molecular_Function	Up
GO:0016813	GO:0016813	hydrolase activity, acting on carbon-nitrogen (but not peptide) bonds, in linear amidines	1/190	11/18352	0.108196	0.220577	0.142835	ARG1	1	geneontology_Molecular_Function	Up
GO:0016832	GO:0016832	aldehyde-lyase activity	1/190	11/18352	0.108196	0.220577	0.142835	ALDOB	1	geneontology_Molecular_Function	Up
GO:0019855	GO:0019855	calcium channel inhibitor activity	1/190	11/18352	0.108196	0.220577	0.142835	AMBP	1	geneontology_Molecular_Function	Up
GO:0031956	GO:0031956	medium-chain fatty acid-CoA ligase activity	1/190	11/18352	0.108196	0.220577	0.142835	SLC27A2	1	geneontology_Molecular_Function	Up
GO:0035251	GO:0035251	UDP-glucosyltransferase activity	1/190	11/18352	0.108196	0.220577	0.142835	GYS2	1	geneontology_Molecular_Function	Up
GO:0047676	GO:0047676	arachidonate-CoA ligase activity	1/190	11/18352	0.108196	0.220577	0.142835	SLC27A2	1	geneontology_Molecular_Function	Up
GO:0140326	GO:0140326	ATPase-coupled intramembrane lipid transporter activity	1/190	11/18352	0.108196	0.220577	0.142835	ABCB4	1	geneontology_Molecular_Function	Up
GO:1990459	GO:1990459	transferrin receptor binding	1/190	11/18352	0.108196	0.220577	0.142835	HJV	1	geneontology_Molecular_Function	Up
GO:0016765	GO:0016765	transferase activity, transferring alkyl or aryl (other than methyl) groups	2/190	56/18352	0.114356	0.230497	0.149259	MAT1A/GSTA1	2	geneontology_Molecular_Function	Up
GO:0004303	GO:0004303	estradiol 17-beta-dehydrogenase activity	1/190	12/18352	0.117435	0.230497	0.149259	HSD17B6	1	geneontology_Molecular_Function	Up
GO:0015250	GO:0015250	water channel activity	1/190	12/18352	0.117435	0.230497	0.149259	AQP9	1	geneontology_Molecular_Function	Up
GO:0022858	GO:0022858	alanine transmembrane transporter activity	1/190	12/18352	0.117435	0.230497	0.149259	SLC38A3	1	geneontology_Molecular_Function	Up
GO:0042301	GO:0042301	phosphate ion binding	1/190	12/18352	0.117435	0.230497	0.149259	OTC	1	geneontology_Molecular_Function	Up
GO:0102991	GO:0102991	myristoyl-CoA hydrolase activity	1/190	12/18352	0.117435	0.230497	0.149259	BAAT	1	geneontology_Molecular_Function	Up
GO:0140161	GO:0140161	monocarboxylate:sodium symporter activity	1/190	12/18352	0.117435	0.230497	0.149259	SLC10A1	1	geneontology_Molecular_Function	Up
GO:0004859	GO:0004859	phospholipase inhibitor activity	1/190	13/18352	0.126578	0.243267	0.157528	APOC1	1	geneontology_Molecular_Function	Up
GO:0036122	GO:0036122	BMP binding	1/190	13/18352	0.126578	0.243267	0.157528	HJV	1	geneontology_Molecular_Function	Up
GO:0039706	GO:0039706	co-receptor binding	1/190	13/18352	0.126578	0.243267	0.157528	TFR2	1	geneontology_Molecular_Function	Up
GO:0061783	GO:0061783	peptidoglycan muralytic activity	1/190	13/18352	0.126578	0.243267	0.157528	PGLYRP2	1	geneontology_Molecular_Function	Up
GO:0005507	GO:0005507	copper ion binding	2/190	60/18352	0.128048	0.244817	0.158532	ANG/ALB	2	geneontology_Molecular_Function	Up
GO:0005372	GO:0005372	water transmembrane transporter activity	1/190	14/18352	0.135627	0.250232	0.162038	AQP9	1	geneontology_Molecular_Function	Up
GO:0015355	GO:0015355	secondary active monocarboxylate transmembrane transporter activity	1/190	14/18352	0.135627	0.250232	0.162038	SLC10A1	1	geneontology_Molecular_Function	Up
GO:0015373	GO:0015373	anion:sodium symporter activity	1/190	14/18352	0.135627	0.250232	0.162038	SLC22A1	1	geneontology_Molecular_Function	Up
GO:0016208	GO:0016208	AMP binding	1/190	14/18352	0.135627	0.250232	0.162038	FBP1	1	geneontology_Molecular_Function	Up
GO:0016290	GO:0016290	palmitoyl-CoA hydrolase activity	1/190	14/18352	0.135627	0.250232	0.162038	BAAT	1	geneontology_Molecular_Function	Up
GO:0016594	GO:0016594	glycine binding	1/190	14/18352	0.135627	0.250232	0.162038	GNMT	1	geneontology_Molecular_Function	Up
GO:0016863	GO:0016863	intramolecular oxidoreductase activity, transposing C=C bonds	1/190	14/18352	0.135627	0.250232	0.162038	GSTA1	1	geneontology_Molecular_Function	Up
GO:0001846	GO:0001846	opsonin binding	1/190	15/18352	0.144583	0.262142	0.169751	MASP2	1	geneontology_Molecular_Function	Up
GO:0004029	GO:0004029	aldehyde dehydrogenase (NAD+) activity	1/190	15/18352	0.144583	0.262142	0.169751	ALDH1L1	1	geneontology_Molecular_Function	Up
GO:0016846	GO:0016846	carbon-sulfur lyase activity	1/190	15/18352	0.144583	0.262142	0.169751	CTH	1	geneontology_Molecular_Function	Up
GO:0031072	GO:0031072	heat shock protein binding	3/190	127/18352	0.144924	0.262142	0.169751	APOA1/APOA2/CYP2E1	3	geneontology_Molecular_Function	Up
GO:0005521	GO:0005521	lamin binding	1/190	16/18352	0.153446	0.267083	0.172951	IFI27	1	geneontology_Molecular_Function	Up
GO:0008191	GO:0008191	metalloendopeptidase inhibitor activity	1/190	16/18352	0.153446	0.267083	0.172951	FETUB	1	geneontology_Molecular_Function	Up
GO:0015347	GO:0015347	sodium-independent organic anion transmembrane transporter activity	1/190	16/18352	0.153446	0.267083	0.172951	SLC22A7	1	geneontology_Molecular_Function	Up
GO:0015556	GO:0015556	C4-dicarboxylate transmembrane transporter activity	1/190	16/18352	0.153446	0.267083	0.172951	SLC13A5	1	geneontology_Molecular_Function	Up
GO:0016641	GO:0016641	oxidoreductase activity, acting on the CH-NH2 group of donors, oxygen as acceptor	1/190	16/18352	0.153446	0.267083	0.172951	DAO	1	geneontology_Molecular_Function	Up
GO:0043395	GO:0043395	heparan sulfate proteoglycan binding	1/190	16/18352	0.153446	0.267083	0.172951	HRG	1	geneontology_Molecular_Function	Up
GO:0047498	GO:0047498	calcium-dependent phospholipase A2 activity	1/190	16/18352	0.153446	0.267083	0.172951	PLA2G2A	1	geneontology_Molecular_Function	Up
GO:1904047	GO:1904047	S-adenosyl-L-methionine binding	1/190	16/18352	0.153446	0.267083	0.172951	GNMT	1	geneontology_Molecular_Function	Up
GO:0016757	GO:0016757	transferase activity, transferring glycosyl groups	5/190	275/18352	0.157373	0.272632	0.176544	GYS2/UGT2B10/UPP2/UGT2B7/UGT2B15	5	geneontology_Molecular_Function	Up
GO:0016811	GO:0016811	hydrolase activity, acting on carbon-nitrogen (but not peptide) bonds, in linear amides	2/190	69/18352	0.160091	0.27458	0.177806	UPB1/PGLYRP2	2	geneontology_Molecular_Function	Up
GO:0048029	GO:0048029	monosaccharide binding	2/190	69/18352	0.160091	0.27458	0.177806	ALDOB/FBP1	2	geneontology_Molecular_Function	Up
GO:0015174	GO:0015174	basic amino acid transmembrane transporter activity	1/190	17/18352	0.162218	0.27458	0.177806	SLC38A3	1	geneontology_Molecular_Function	Up
GO:0015377	GO:0015377	cation:chloride symporter activity	1/190	17/18352	0.162218	0.27458	0.177806	SLC22A1	1	geneontology_Molecular_Function	Up
GO:0016888	GO:0016888	endodeoxyribonuclease activity, producing 5'-phosphomonoesters	1/190	17/18352	0.162218	0.27458	0.177806	DNASE1L3	1	geneontology_Molecular_Function	Up
GO:0004521	GO:0004521	endoribonuclease activity	2/190	70/18352	0.163739	0.275889	0.178653	RNASE4/RIDA	2	geneontology_Molecular_Function	Up
GO:0016646	GO:0016646	oxidoreductase activity, acting on the CH-NH group of donors, NAD or NADP as acceptor	1/190	18/18352	0.1709	0.285349	0.184779	ALDH1L1	1	geneontology_Molecular_Function	Up
GO:0046527	GO:0046527	glucosyltransferase activity	1/190	18/18352	0.1709	0.285349	0.184779	GYS2	1	geneontology_Molecular_Function	Up
GO:0016835	GO:0016835	carbon-oxygen lyase activity	2/190	74/18352	0.178472	0.295681	0.191469	ETNPPL/UROC1	2	geneontology_Molecular_Function	Up
GO:0004675	GO:0004675	transmembrane receptor protein serine/threonine kinase activity	1/190	19/18352	0.179492	0.295681	0.191469	HJV	1	geneontology_Molecular_Function	Up
GO:0005326	GO:0005326	neurotransmitter transmembrane transporter activity	1/190	19/18352	0.179492	0.295681	0.191469	SLC22A1	1	geneontology_Molecular_Function	Up
GO:0008320	GO:0008320	protein transmembrane transporter activity	1/190	20/18352	0.187996	0.306949	0.198766	AZGP1	1	geneontology_Molecular_Function	Up
GO:0140318	GO:0140318	protein transporter activity	1/190	20/18352	0.187996	0.306949	0.198766	AZGP1	1	geneontology_Molecular_Function	Up
GO:0004602	GO:0004602	glutathione peroxidase activity	1/190	21/18352	0.196412	0.315113	0.204052	GSTA1	1	geneontology_Molecular_Function	Up
GO:0019200	GO:0019200	carbohydrate kinase activity	1/190	21/18352	0.196412	0.315113	0.204052	PFKFB1	1	geneontology_Molecular_Function	Up
GO:0050750	GO:0050750	low-density lipoprotein particle receptor binding	1/190	21/18352	0.196412	0.315113	0.204052	APOA5	1	geneontology_Molecular_Function	Up
GO:0140303	GO:0140303	intramembrane lipid transporter activity	1/190	21/18352	0.196412	0.315113	0.204052	ABCB4	1	geneontology_Molecular_Function	Up
GO:0016247	GO:0016247	channel regulator activity	3/190	148/18352	0.198176	0.316567	0.204994	AMBP/GPLD1/FXYD1	3	geneontology_Molecular_Function	Up
GO:0050660	GO:0050660	flavin adenine dinucleotide binding	2/190	81/18352	0.204697	0.321487	0.20818	LDHD/DAO	2	geneontology_Molecular_Function	Up
GO:0000062	GO:0000062	fatty-acyl-CoA binding	1/190	22/18352	0.204741	0.321487	0.20818	ACOT12	1	geneontology_Molecular_Function	Up
GO:0015296	GO:0015296	anion:cation symporter activity	1/190	22/18352	0.204741	0.321487	0.20818	SLC22A1	1	geneontology_Molecular_Function	Up
GO:0022884	GO:0022884	macromolecule transmembrane transporter activity	1/190	22/18352	0.204741	0.321487	0.20818	AZGP1	1	geneontology_Molecular_Function	Up
GO:0016411	GO:0016411	acylglycerol O-acyltransferase activity	1/190	23/18352	0.212984	0.333013	0.215644	MOGAT2	1	geneontology_Molecular_Function	Up
GO:0004364	GO:0004364	glutathione transferase activity	1/190	25/18352	0.229216	0.355382	0.230129	GSTA1	1	geneontology_Molecular_Function	Up
GO:0120227	GO:0120227	acyl-CoA binding	1/190	25/18352	0.229216	0.355382	0.230129	ACOT12	1	geneontology_Molecular_Function	Up
GO:0005347	GO:0005347	ATP transmembrane transporter activity	1/190	26/18352	0.237207	0.363193	0.235187	SLC25A47	1	geneontology_Molecular_Function	Up
GO:0102567	GO:0102567	phospholipase A2 activity (consuming 1,2-dipalmitoylphosphatidylcholine)	1/190	26/18352	0.237207	0.363193	0.235187	PLA2G2A	1	geneontology_Molecular_Function	Up
GO:0102568	GO:0102568	phospholipase A2 activity consuming 1,2-dioleoylphosphatidylethanolamine)	1/190	26/18352	0.237207	0.363193	0.235187	PLA2G2A	1	geneontology_Molecular_Function	Up
GO:0001968	GO:0001968	fibronectin binding	1/190	27/18352	0.245116	0.370687	0.24004	LPA	1	geneontology_Molecular_Function	Up
GO:0042910	GO:0042910	xenobiotic transmembrane transporter activity	1/190	27/18352	0.245116	0.370687	0.24004	SLC22A1	1	geneontology_Molecular_Function	Up
GO:0051787	GO:0051787	misfolded protein binding	1/190	27/18352	0.245116	0.370687	0.24004	F12	1	geneontology_Molecular_Function	Up
GO:0045499	GO:0045499	chemorepellent activity	1/190	28/18352	0.252943	0.380963	0.246694	APOA1	1	geneontology_Molecular_Function	Up
GO:0005201	GO:0005201	extracellular matrix structural constituent	3/190	169/18352	0.255268	0.382902	0.24795	FGA/FGG/FGB	3	geneontology_Molecular_Function	Up
GO:0090482	GO:0090482	vitamin transmembrane transporter activity	1/190	29/18352	0.260689	0.38788	0.251173	RBP4	1	geneontology_Molecular_Function	Up
GO:1901567	GO:1901567	fatty acid derivative binding	1/190	29/18352	0.260689	0.38788	0.251173	ACOT12	1	geneontology_Molecular_Function	Up
GO:0000295	GO:0000295	adenine nucleotide transmembrane transporter activity	1/190	30/18352	0.268355	0.396092	0.256491	SLC25A47	1	geneontology_Molecular_Function	Up
GO:0005346	GO:0005346	purine ribonucleotide transmembrane transporter activity	1/190	30/18352	0.268355	0.396092	0.256491	SLC25A47	1	geneontology_Molecular_Function	Up
GO:0015216	GO:0015216	purine nucleotide transmembrane transporter activity	1/190	31/18352	0.275942	0.404058	0.26165	SLC25A47	1	geneontology_Molecular_Function	Up
GO:1904680	GO:1904680	peptide transmembrane transporter activity	1/190	31/18352	0.275942	0.404058	0.26165	AZGP1	1	geneontology_Molecular_Function	Up
GO:0019239	GO:0019239	deaminase activity	1/190	32/18352	0.283451	0.413413	0.267707	RIDA	1	geneontology_Molecular_Function	Up
GO:0015108	GO:0015108	chloride transmembrane transporter activity	2/190	102/18352	0.284988	0.414018	0.268099	SLC22A1/FXYD1	2	geneontology_Molecular_Function	Up
GO:0004623	GO:0004623	phospholipase A2 activity	1/190	33/18352	0.290883	0.41928	0.271506	PLA2G2A	1	geneontology_Molecular_Function	Up
GO:0015215	GO:0015215	nucleotide transmembrane transporter activity	1/190	33/18352	0.290883	0.41928	0.271506	SLC25A47	1	geneontology_Molecular_Function	Up
GO:0004620	GO:0004620	phospholipase activity	2/190	105/18352	0.296479	0.424034	0.274585	GPLD1/PLA2G2A	2	geneontology_Molecular_Function	Up
GO:0016407	GO:0016407	acetyltransferase activity	2/190	105/18352	0.296479	0.424034	0.274585	MOGAT2/LCAT	2	geneontology_Molecular_Function	Up
GO:0015175	GO:0015175	neutral amino acid transmembrane transporter activity	1/190	34/18352	0.298237	0.424902	0.275147	SLC38A3	1	geneontology_Molecular_Function	Up
GO:0030246	GO:0030246	carbohydrate binding	4/190	267/18352	0.299443	0.424978	0.275196	ALDOB/CLEC3B/FBP1/ZG16	4	geneontology_Molecular_Function	Up
GO:0043394	GO:0043394	proteoglycan binding	1/190	36/18352	0.31272	0.442122	0.286298	HRG	1	geneontology_Molecular_Function	Up
GO:0015144	GO:0015144	carbohydrate transmembrane transporter activity	1/190	37/18352	0.31985	0.448762	0.290598	AQP9	1	geneontology_Molecular_Function	Up
GO:0042056	GO:0042056	chemoattractant activity	1/190	37/18352	0.31985	0.448762	0.290598	CCL16	1	geneontology_Molecular_Function	Up
GO:0016791	GO:0016791	phosphatase activity	4/190	277/18352	0.322776	0.451153	0.292146	PON1/PFKFB1/PON3/FBP1	4	geneontology_Molecular_Function	Up
GO:0008200	GO:0008200	ion channel inhibitor activity	1/190	38/18352	0.326906	0.453489	0.293659	AMBP	1	geneontology_Molecular_Function	Up
GO:0032451	GO:0032451	demethylase activity	1/190	38/18352	0.326906	0.453489	0.293659	CYP1A2	1	geneontology_Molecular_Function	Up
GO:0005310	GO:0005310	dicarboxylic acid transmembrane transporter activity	1/190	39/18352	0.333889	0.45972	0.297693	SLC13A5	1	geneontology_Molecular_Function	Up
GO:0016248	GO:0016248	channel inhibitor activity	1/190	39/18352	0.333889	0.45972	0.297693	AMBP	1	geneontology_Molecular_Function	Up
GO:0042578	GO:0042578	phosphoric ester hydrolase activity	5/190	369/18352	0.335532	0.460265	0.298046	PON1/PFKFB1/PON3/FBP1/GPLD1	5	geneontology_Molecular_Function	Up
GO:0004520	GO:0004520	endodeoxyribonuclease activity	1/190	40/18352	0.3408	0.465759	0.301604	DNASE1L3	1	geneontology_Molecular_Function	Up
GO:0016758	GO:0016758	transferase activity, transferring hexosyl groups	3/190	201/18352	0.345444	0.470364	0.304586	GYS2/UGT2B7/UGT2B15	3	geneontology_Molecular_Function	Up
GO:0019213	GO:0019213	deacetylase activity	1/190	41/18352	0.347639	0.471614	0.305395	CES2	1	geneontology_Molecular_Function	Up
GO:0099106	GO:0099106	ion channel regulator activity	2/190	119/18352	0.349605	0.472544	0.305997	AMBP/FXYD1	2	geneontology_Molecular_Function	Up
GO:0030544	GO:0030544	Hsp70 protein binding	1/190	42/18352	0.354408	0.475552	0.307945	CYP2E1	1	geneontology_Molecular_Function	Up
GO:0051879	GO:0051879	Hsp90 protein binding	1/190	42/18352	0.354408	0.475552	0.307945	CYP2E1	1	geneontology_Molecular_Function	Up
GO:0015077	GO:0015077	monovalent inorganic cation transmembrane transporter activity	5/190	381/18352	0.360126	0.480674	0.311262	SLC10A1/SLC22A1/SLC13A5/MFSD2A/SLC28A1	5	geneontology_Molecular_Function	Up
GO:0005179	GO:0005179	hormone activity	2/190	122/18352	0.360831	0.480674	0.311262	TTR/FNDC5	2	geneontology_Molecular_Function	Up
hsa04110	hsa04110	Cell cycle	47/411	126/8093	3.08787e-29	9.07834e-27	7.83344e-27	BUB1B/RBL1/BUB1/CHEK1/MAD2L1/E2F3/PLK1/MCM6/CDK4/CDK1/MCM2/YWHAQ/MCM4/ORC1/MCM3/CDC6/CDK2/TTK/ABL1/ORC6/CCNB1/CDC7/CCNB2/RAD21/SMC3/CDC25A/CCNA2/PKMYT1/CDC45/YWHAZ/CDC20/PRKDC/ESPL1/SMC1A/MCM7/MCM5/TFDP1/STAG1/CDC25B/SKP2/PTTG1/CDC25C/E2F1/TGFB2/CCNE1/TGFB1/SFN	47	pathway_KEGG	Down
hsa04512	hsa04512	ECM-receptor interaction	21/411	88/8093	1.69716e-09	2.49482e-07	2.15271e-07	HMMR/LAMC1/ITGAV/ITGA5/AGRN/ITGA2/LAMA5/ITGB1/FRAS1/COL9A2/LAMB1/ITGB4/ITGA3/COL6A3/SPP1/NPNT/LAMC2/COL4A5/THBS1/COL1A2/COL1A1	21	pathway_KEGG	Down
hsa04114	hsa04114	Oocyte meiosis	22/411	131/8093	5.91647e-07	5.79814e-05	5.00305e-05	BUB1/MAD2L1/PLK1/FBXO5/CDK1/YWHAQ/CDK2/SGO1/CCNB1/CCNB2/SMC3/PKMYT1/YWHAZ/CDC20/ESPL1/SMC1A/ITPR3/PTTG1/AURKA/CDC25C/MAPK13/CCNE1	22	pathway_KEGG	Down
hsa03030	hsa03030	DNA replication	11/411	36/8093	9.62683e-07	7.07572e-05	6.10544e-05	POLA1/MCM6/MCM2/POLD1/MCM4/MCM3/RFC4/FEN1/RFC3/MCM7/MCM5	11	pathway_KEGG	Down
hsa05222	hsa05222	Small cell lung cancer	17/411	92/8093	2.98399e-06	0.000175459	0.000151398	E2F3/CDK4/BAK1/CDK2/LAMC1/ITGAV/CKS2/ITGA2/LAMA5/SKP2/ITGB1/LAMB1/E2F1/ITGA3/CCNE1/LAMC2/COL4A5	17	pathway_KEGG	Down
hsa04218	hsa04218	Cellular senescence	22/411	156/8093	1.16196e-05	0.000569359	0.000491284	RBL1/CHEK1/E2F3/FOXM1/CDK4/CDK1/LIN9/CDK2/MYBL2/CCNB1/CCNB2/CDC25A/CCNA2/ITPR3/NFATC2/E2F1/TGFB2/MAPK13/CCNE1/TGFB1/CXCL8/SERPINE1	22	pathway_KEGG	Down
hsa05219	hsa05219	Bladder cancer	10/411	41/8093	2.77397e-05	0.00116507	0.0010053	E2F3/CDK4/SRC/E2F1/MMP1/FGFR3/CXCL8/MMP9/THBS1/UPK3A	10	pathway_KEGG	Down
hsa04933	hsa04933	AGE-RAGE signaling pathway in diabetic complications	15/411	100/8093	0.000142632	0.00446766	0.00385502	CDK4/PRKCD/PLCG1/PLCB1/TGFB2/MAPK13/ICAM1/TGFB1/CXCL8/COL4A5/VEGFB/COL1A2/COL3A1/COL1A1/SERPINE1	15	pathway_KEGG	Down
hsa05165	hsa05165	Human papillomavirus infection	33/411	331/8093	0.000143314	0.00446766	0.00385502	RBL1/PRKCI/DVL3/CDK4/DVL2/BAK1/CDK2/PKM/CCNA2/LAMC1/IKBKE/ITGAV/FZD1/ITGA5/ITGA2/LAMA5/ITGB1/COL9A2/LAMB1/E2F1/JAG1/ITGB4/DLG3/FZD7/ITGA3/CCNE1/COL6A3/SPP1/LAMC2/COL4A5/THBS1/COL1A2/COL1A1	33	pathway_KEGG	Down
hsa03440	hsa03440	Homologous recombination	9/411	41/8093	0.000168815	0.00446766	0.00385502	TOPBP1/XRCC2/BARD1/BRCA1/POLD1/RAD54L/EME1/RAD51/RBBP8	9	pathway_KEGG	Down
hsa05146	hsa05146	Amoebiasis	15/411	102/8093	0.000178941	0.00446766	0.00385502	PLCB1/LAMC1/VCL/LAMA5/LAMB1/TGFB2/ITGAM/TGFB1/LAMC2/CXCL8/COL4A5/COL1A2/CXCL1/COL3A1/COL1A1	15	pathway_KEGG	Down
hsa05230	hsa05230	Central carbon metabolism in cancer	12/411	70/8093	0.000182353	0.00446766	0.00385502	PKM/G6PD/HIF1A/SLC1A5/GLS/SLC16A3/SLC2A1/PFKP/HKDC1/FGFR3/HK2/FGFR2	12	pathway_KEGG	Down
hsa04510	hsa04510	Focal adhesion	23/411	201/8093	0.00020712	0.00453677	0.00391465	SRC/LAMC1/PIP5K1A/VCL/ITGAV/ITGA5/ITGA2/LAMA5/ITGB1/COL9A2/LAMB1/ITGB4/FLNA/ITGA3/COL6A3/SPP1/LAMC2/COL4A5/THBS1/VEGFB/FLNC/COL1A2/COL1A1	23	pathway_KEGG	Down
hsa05206	hsa05206	MicroRNAs in cancer	31/411	310/8093	0.000216037	0.00453677	0.00391465	KIF23/E2F3/DNMT1/EZH2/BAK1/BRCA1/ABL1/CDCA5/DNMT3B/DNMT3A/CDC25A/PLCG1/STMN1/ABCC1/MARCKS/ITGA5/BMF/SOX4/SLC7A1/CDC25B/GLS/CDC25C/E2F1/TGFB2/FSCN1/CCNE1/FGFR3/IGF2BP1/MMP9/THBS1/ST14	31	pathway_KEGG	Down
hsa04115	hsa04115	p53 signaling pathway	12/411	73/8093	0.000274515	0.00509313	0.00439472	GTSE1/CHEK1/CDK4/CDK1/CDK2/CCNB1/CCNB2/RRM2/CCNE1/THBS1/SERPINE1/SFN	12	pathway_KEGG	Down
hsa05205	hsa05205	Proteoglycans in cancer	23/411	205/8093	0.000277177	0.00509313	0.00439472	CBL/SRC/PLCG1/HIF1A/IQGAP1/ITPR3/ITGAV/FZD1/ITGA5/ITGA2/ITGB1/TGFB2/PLAUR/FZD7/FLNA/MAPK13/TGFB1/MMP9/THBS1/FLNC/COL1A2/COL1A1/GPC3	23	pathway_KEGG	Down
hsa03460	hsa03460	Fanconi anemia pathway	10/411	54/8093	0.000327481	0.0056635	0.00488687	FANCD2/FANCI/BRCA1/USP1/EME1/RAD51/FANCE/FANCG/UBE2T/RMI2	10	pathway_KEGG	Down
hsa04914	hsa04914	Progesterone-mediated oocyte maturation	14/411	102/8093	0.000601297	0.00982118	0.00847442	BUB1/MAD2L1/PLK1/CDK1/CDK2/CCNB1/CCNB2/CDC25A/CCNA2/PKMYT1/CDC25B/AURKA/CDC25C/MAPK13	14	pathway_KEGG	Down
hsa04974	hsa04974	Protein digestion and absorption	14/411	103/8093	0.000664434	0.0102812	0.00887139	SLC36A1/ATP1B3/ATP1A1/SLC1A5/COL9A2/COL5A2/COL6A3/COL4A5/MEP1A/COL5A1/COL1A2/COL3A1/COL1A1/FXYD2	14	pathway_KEGG	Down
hsa04151	hsa04151	PI3K-Akt signaling pathway	32/411	354/8093	0.001016	0.0149352	0.0128871	CDK4/BRCA1/YWHAQ/CDK2/YWHAZ/LAMC1/ITGAV/ITGA5/ITGA2/LAMA5/ITGB1/COL9A2/LAMB1/KITLG/CSF1/ITGB4/LPAR2/ITGA3/CCNE1/PRKAA2/FGFR3/TGFA/OSMR/COL6A3/SPP1/LAMC2/COL4A5/THBS1/VEGFB/COL1A2/COL1A1/FGFR2	32	pathway_KEGG	Down
hsa04066	hsa04066	HIF-1 signaling pathway	14/411	109/8093	0.00117332	0.0164264	0.0141739	VHL/IFNGR2/PLCG1/HIF1A/TFRC/ENO2/ALDOA/PFKFB3/EGLN3/SLC2A1/PFKP/HKDC1/HK2/SERPINE1	14	pathway_KEGG	Down
hsa05161	hsa05161	Hepatitis B	17/411	162/8093	0.0034588	0.0462221	0.0398838	E2F3/YWHAQ/CDK2/SRC/MAP3K1/CCNA2/YWHAZ/IKBKE/BIRC5/NFATC2/E2F1/TGFB2/MAPK13/CCNE1/TGFB1/CXCL8/MMP9	17	pathway_KEGG	Down
hsa05166	hsa05166	Human T-cell leukemia virus 1 infection	21/411	222/8093	0.00430806	0.0534542	0.0461241	BUB1B/TCF3/CHEK1/MAD2L1/E2F3/CDK4/CDK2/MAP3K1/CCNB2/CCNA2/CDC20/ESPL1/NFATC2/PTTG1/E2F1/TGFB2/SLC2A1/CCNE1/ICAM1/TGFB1/MMP7	21	pathway_KEGG	Down
hsa04145	hsa04145	Phagosome	16/411	152/8093	0.00436361	0.0534542	0.0461241	TUBA1C/TUBA1B/DYNC1I2/HGS/ITGAV/ITGA5/TFRC/M6PR/ITGA2/ITGB1/DYNC1LI2/ITGAM/OLR1/NCF2/THBS1/CYBA	16	pathway_KEGG	Down
hsa03430	hsa03430	Mismatch repair	5/411	23/8093	0.00518816	0.0610127	0.0526462	MSH2/POLD1/EXO1/RFC4/RFC3	5	pathway_KEGG	Down
hsa05410	hsa05410	Hypertrophic cardiomyopathy	11/411	90/8093	0.00564584	0.0638415	0.055087	ITGAV/ITGA5/TPM4/ITGA2/ITGB1/TGFB2/ITGB4/ITGA3/PRKAA2/TGFB1/CACNG4	11	pathway_KEGG	Down
hsa04390	hsa04390	Hippo signaling pathway	16/411	157/8093	0.0059717	0.0650252	0.0561084	PRKCI/DVL3/DVL2/YWHAQ/DLG5/YWHAZ/BIRC5/FZD1/YAP1/TEAD2/TGFB2/DLG3/FZD7/TGFB1/SERPINE1/AFP	16	pathway_KEGG	Down
hsa04810	hsa04810	Regulation of actin cytoskeleton	20/411	218/8093	0.00737257	0.077412	0.0667966	LIMK1/NCKAP1/SRC/WASF1/ENAH/PIP5K1A/VCL/IQGAP1/ITGAV/IQGAP3/ITGA5/ITGA2/ITGB1/ITGB4/LPAR2/ITGAM/ITGA3/PFN2/FGFR3/FGFR2	20	pathway_KEGG	Down
hsa04657	hsa04657	IL-17 signaling pathway	11/411	94/8093	0.00782044	0.0792831	0.0684111	IKBKE/TNFAIP3/MMP1/MAPK13/CXCL5/CXCL8/MMP9/CCL20/CXCL1/CXCL6/S100A9	11	pathway_KEGG	Down
hsa03013	hsa03013	Nucleocytoplasmic transport	12/411	109/8093	0.00903553	0.0885482	0.0764057	NUP62/KPNB1/NUP205/NUP107/KPNA2/NUP188/XPOT/NUP210/TPR/NUP153/POM121/DDX39B	12	pathway_KEGG	Down
hsa04015	hsa04015	Rap1 signaling pathway	19/411	210/8093	0.0102401	0.0971156	0.0837983	PRKCI/SRC/ENAH/PLCG1/PLCB1/SIPA1L3/ADORA2B/ITGB1/KITLG/CSF1/RAP1GAP/LPAR2/ITGAM/MAPK13/PFN2/FGFR3/THBS1/VEGFB/FGFR2	19	pathway_KEGG	Down
hsa04668	hsa04668	TNF signaling pathway	12/411	112/8093	0.0111168	0.0998663	0.0861718	CSF1/MMP14/JAG1/TNFAIP3/MAPK13/ICAM1/LIF/CXCL5/MMP9/CCL20/CXCL1/CXCL6	12	pathway_KEGG	Down
hsa05225	hsa05225	Hepatocellular carcinoma	16/411	168/8093	0.0112095	0.0998663	0.0861718	SMARCD1/SMARCC1/ACTL6A/DVL3/E2F3/CDK4/DVL2/BAK1/PLCG1/SMARCC2/FZD1/E2F1/TGFB2/FZD7/TGFA/TGFB1	16	pathway_KEGG	Down
hsa01230	hsa01230	Biosynthesis of amino acids	9/411	75/8093	0.0132222	0.114333	0.098655	CS/PKM/PSPH/ENO2/MAT2A/ALDOA/ASNS/PFKP/PYCR1	9	pathway_KEGG	Down
hsa05100	hsa05100	Bacterial invasion of epithelial cells	9/411	77/8093	0.0155456	0.126956	0.109547	CD2AP/CBL/SRC/SEPTIN2/WASF1/VCL/ITGA5/ITGB1/DNM1	9	pathway_KEGG	Down
hsa05140	hsa05140	Leishmaniasis	9/411	77/8093	0.0155456	0.126956	0.109547	IFNGR2/ITGB1/MARCKSL1/TGFB2/ITGAM/MAPK13/NCF2/TGFB1/CYBA	9	pathway_KEGG	Down
hsa05323	hsa05323	Rheumatoid arthritis	10/411	93/8093	0.0191209	0.151934	0.131099	CSF1/TGFB2/MMP1/ICAM1/TGFB1/CXCL5/CXCL8/CCL20/CXCL1/CXCL6	10	pathway_KEGG	Down
hsa04350	hsa04350	TGF-beta signaling pathway	10/411	94/8093	0.0204662	0.158344	0.13663	RBL1/ACVR1/SMAD5/NEO1/TFDP1/TGFB2/BAMBI/LTBP1/TGFB1/THBS1	10	pathway_KEGG	Down
hsa00240	hsa00240	Pyrimidine metabolism	7/411	56/8093	0.0223784	0.167523	0.144551	CAD/DCK/UCK2/RRM2/TYMS/NT5C2/TK1	7	pathway_KEGG	Down
hsa05211	hsa05211	Renal cell carcinoma	8/411	69/8093	0.0229257	0.167523	0.144551	VHL/HIF1A/ARNT2/TGFB2/EGLN3/SLC2A1/TGFA/TGFB1	8	pathway_KEGG	Down
hsa05414	hsa05414	Dilated cardiomyopathy	10/411	96/8093	0.0233621	0.167523	0.144551	ITGAV/ITGA5/TPM4/ITGA2/ITGB1/TGFB2/ITGB4/ITGA3/TGFB1/CACNG4	10	pathway_KEGG	Down
hsa00051	hsa00051	Fructose and mannose metabolism	5/411	33/8093	0.0241688	0.169182	0.145982	ALDOA/PFKFB3/PFKP/HKDC1/HK2	5	pathway_KEGG	Down
hsa04666	hsa04666	Fc gamma R-mediated phagocytosis	10/411	97/8093	0.0249162	0.170357	0.146997	LIMK1/ASAP1/PRKCD/WASF1/PLCG1/PIP5K1A/MARCKS/MARCKSL1/SPHK1/PLPP2	10	pathway_KEGG	Down
hsa04964	hsa04964	Proximal tubule bicarbonate reclamation	4/411	23/8093	0.0269454	0.180044	0.155355	ATP1B3/ATP1A1/GLS/FXYD2	4	pathway_KEGG	Down
hsa04550	hsa04550	Signaling pathways regulating pluripotency of stem cells	13/411	143/8093	0.0295339	0.192955	0.166495	DVL3/TCF3/DVL2/ACVR1/SMAD5/SKIL/FZD1/FZD7/MAPK13/FGFR3/LIF/DUSP9/FGFR2	13	pathway_KEGG	Down
hsa04973	hsa04973	Carbohydrate digestion and absorption	6/411	47/8093	0.0304784	0.194796	0.168084	PLCB1/ATP1B3/ATP1A1/HKDC1/HK2/FXYD2	6	pathway_KEGG	Down
hsa00600	hsa00600	Sphingolipid metabolism	6/411	49/8093	0.0364952	0.228289	0.196984	SMPD4/SPTLC1/SGPP2/SPHK1/GAL3ST1/PLPP2	6	pathway_KEGG	Down
hsa05212	hsa05212	Pancreatic cancer	8/411	76/8093	0.0381502	0.228901	0.197512	E2F3/CDK4/BAK1/RAD51/E2F1/TGFB2/TGFA/TGFB1	8	pathway_KEGG	Down
hsa05220	hsa05220	Chronic myeloid leukemia	8/411	76/8093	0.0381502	0.228901	0.197512	E2F3/CDK4/BAK1/CBL/ABL1/E2F1/TGFB2/TGFB1	8	pathway_KEGG	Down
hsa05412	hsa05412	Arrhythmogenic right ventricular cardiomyopathy	8/411	77/8093	0.040771	0.239733	0.206859	ITGAV/ITGA5/ITGA2/ITGB1/DSG2/ITGB4/ITGA3/CACNG4	8	pathway_KEGG	Down
hsa05130	hsa05130	Pathogenic Escherichia coli infection	16/411	197/8093	0.0424078	0.243937	0.210486	TUBA1C/BAK1/TUBA1B/NCKAP1/SRC/ABL1/ARHGEF2/WASF1/ARHGEF11/ITGB1/NCK2/SEC24C/LPAR2/MAPK13/CXCL8/CLDN4	16	pathway_KEGG	Down
hsa04919	hsa04919	Thyroid hormone signaling pathway	11/411	121/8093	0.0431453	0.243937	0.210486	SRC/MED12/PLCG1/PLCB1/ATP1B3/HIF1A/ATP1A1/ITGAV/SLC2A1/PFKP/FXYD2	11	pathway_KEGG	Down
hsa00601	hsa00601	Glycosphingolipid biosynthesis - lacto and neolacto series	4/411	27/8093	0.0455937	0.252916	0.218234	B3GALNT1/FUT4/B3GNT5/B3GNT3	4	pathway_KEGG	Down
hsa04961	hsa04961	Endocrine and other factor-regulated calcium reabsorption	6/411	53/8093	0.0506844	0.275948	0.238108	ATP2B1/PLCB1/ATP1B3/ATP1A1/DNM1/FXYD2	6	pathway_KEGG	Down
hsa00010	hsa00010	Glycolysis / Gluconeogenesis	7/411	67/8093	0.0524503	0.280371	0.241924	PKM/ENO2/ALDH3B1/ALDOA/PFKP/HKDC1/HK2	7	pathway_KEGG	Down
hsa04120	hsa04120	Ubiquitin mediated proteolysis	12/411	142/8093	0.0568669	0.293073	0.252884	UBA2/VHL/BRCA1/CBL/MAP3K1/PIAS3/CDC20/UBE2C/UBE2Q2/SKP2/UBE2S/RHOBTB1	12	pathway_KEGG	Down
hsa05215	hsa05215	Prostate cancer	9/411	97/8093	0.0572812	0.293073	0.252884	E2F3/CDK2/ETV5/E2F1/CCNE1/TGFA/SPINT1/MMP9/FGFR2	9	pathway_KEGG	Down
hsa05145	hsa05145	Toxoplasmosis	10/411	112/8093	0.0578171	0.293073	0.252884	IFNGR2/LAMC1/LAMA5/ITGB1/LAMB1/TGFB2/ALOX5/MAPK13/TGFB1/LAMC2	10	pathway_KEGG	Down
hsa04926	hsa04926	Relaxin signaling pathway	11/411	129/8093	0.0630604	0.312069	0.269276	SRC/PLCB1/MMP1/MAPK13/TGFB1/COL4A5/MMP9/VEGFB/COL1A2/COL3A1/COL1A1	11	pathway_KEGG	Down
hsa04670	hsa04670	Leukocyte transendothelial migration	10/411	114/8093	0.0636876	0.312069	0.269276	PLCG1/VCL/ITGB1/ITGAM/MAPK13/NCF2/ICAM1/MMP9/CYBA/CLDN4	10	pathway_KEGG	Down
hsa04068	hsa04068	FoxO signaling pathway	11/411	131/8093	0.0688451	0.331811	0.28631	PLK4/PLK1/CDK2/CCNB1/CCNB2/SKP2/HOMER3/TGFB2/MAPK13/PRKAA2/TGFB1	11	pathway_KEGG	Down
hsa04514	hsa04514	Cell adhesion molecules	12/411	149/8093	0.0759338	0.354358	0.305765	MPZL1/NEO1/ITGAV/CNTNAP1/NECTIN1/ITGB1/ITGAM/ICAM1/VTCN1/VCAN/NRCAM/CLDN4	12	pathway_KEGG	Down
hsa05226	hsa05226	Gastric cancer	12/411	149/8093	0.0759338	0.354358	0.305765	DVL3/E2F3/DVL2/BAK1/CDK2/FZD1/E2F1/TGFB2/FZD7/CCNE1/TGFB1/FGFR2	12	pathway_KEGG	Down
hsa04360	hsa04360	Axon guidance	14/411	182/8093	0.0789373	0.362618	0.312893	PLXNA1/LIMK1/SRC/ABL1/ENAH/PLCG1/NEO1/PLXNA3/NFATC2/ITGB1/NCK2/UNC5B/SEMA6A/ROBO1	14	pathway_KEGG	Down
hsa04976	hsa04976	Bile secretion	8/411	89/8093	0.0816967	0.369521	0.318849	ATP1B3/ATP1A1/NCEH1/SLC2A1/SCTR/UGT2A3/FXYD2/UGT2B11	8	pathway_KEGG	Down
hsa05133	hsa05133	Pertussis	7/411	76/8093	0.0901578	0.401612	0.346539	ITGA5/ITGB1/ITGAM/MAPK13/CXCL5/CXCL8/CXCL6	7	pathway_KEGG	Down
hsa00520	hsa00520	Amino sugar and nucleotide sugar metabolism	5/411	48/8093	0.0947509	0.411573	0.355135	GNPDA1/UAP1L1/HKDC1/HK2/RENBP	5	pathway_KEGG	Down
hsa04934	hsa04934	Cushing syndrome	12/411	155/8093	0.0951938	0.411573	0.355135	DVL3/E2F3/CDK4/DVL2/CDK2/PLCB1/ITPR3/FZD1/NCEH1/E2F1/FZD7/CCNE1	12	pathway_KEGG	Down
hsa04611	hsa04611	Platelet activation	10/411	124/8093	0.0986659	0.417214	0.360003	PRKCI/SRC/PLCB1/ITPR3/ITGA2/ITGB1/MAPK13/COL1A2/COL3A1/COL1A1	10	pathway_KEGG	Down
hsa04970	hsa04970	Salivary secretion	8/411	93/8093	0.0993368	0.417214	0.360003	ATP2B1/PLCB1/ATP1B3/ATP1A1/ITPR3/FXYD2/CST1/LYZ	8	pathway_KEGG	Down
hsa00565	hsa00565	Ether lipid metabolism	5/411	49/8093	0.101371	0.419761	0.3622	LPCAT1/LPCAT4/PAFAH1B3/GAL3ST1/PLPP2	5	pathway_KEGG	Down
hsa00270	hsa00270	Cysteine and methionine metabolism	5/411	50/8093	0.108215	0.435745	0.375992	DNMT1/DNMT3B/DNMT3A/MAT2A/IL4I1	5	pathway_KEGG	Down
hsa05144	hsa05144	Malaria	5/411	50/8093	0.108215	0.435745	0.375992	TGFB2/ICAM1/TGFB1/CXCL8/THBS1	5	pathway_KEGG	Down
hsa05202	hsa05202	Transcriptional misregulation in cancer	14/411	192/8093	0.109677	0.435745	0.375992	NSD2/TCF3/BAK1/LDB1/CCNA2/ETV5/ARNT2/ITGAM/PROM1/SPINT1/CXCL8/ETV4/MMP9/SSX1	14	pathway_KEGG	Down
hsa00250	hsa00250	Alanine, aspartate and glutamate metabolism	4/411	37/8093	0.116256	0.445128	0.384088	CAD/GLS/ASNS/IL4I1	4	pathway_KEGG	Down
hsa04960	hsa04960	Aldosterone-regulated sodium reabsorption	4/411	37/8093	0.116256	0.445128	0.384088	ATP1B3/ATP1A1/FXYD2/SFN	4	pathway_KEGG	Down
hsa05167	hsa05167	Kaposi sarcoma-associated herpesvirus infection	14/411	194/8093	0.116581	0.445128	0.384088	E2F3/CDK4/BAK1/SRC/PLCG1/IKBKE/HIF1A/ITPR3/NFATC2/E2F1/MAPK13/ICAM1/CXCL8/CXCL1	14	pathway_KEGG	Down
hsa04070	hsa04070	Phosphatidylinositol signaling system	8/411	97/8093	0.118954	0.448365	0.386881	MTMR2/PLCG1/PLCB1/PIP5K1A/ITPR3/PIP4P2/ITPKA/CDS1	8	pathway_KEGG	Down
hsa05131	hsa05131	Shigellosis	17/411	247/8093	0.12422	0.462288	0.398895	SRC/SEPTIN2/ARHGEF2/PRKCD/WASF1/FNBP1L/PLCG1/PLCB1/VCL/ITPR3/ITGA5/ITGB1/MAPK13/PFN2/HKDC1/HK2/CXCL8	17	pathway_KEGG	Down
hsa04640	hsa04640	Hematopoietic cell lineage	8/411	99/8093	0.129483	0.470496	0.405977	ITGA5/TFRC/ITGA2/KITLG/CSF1/ITGAM/CD24/ITGA3	8	pathway_KEGG	Down
hsa01200	hsa01200	Carbon metabolism	9/411	115/8093	0.129626	0.470496	0.405977	CS/PKM/G6PD/PSPH/ENO2/ALDOA/PFKP/HKDC1/HK2	9	pathway_KEGG	Down
hsa04310	hsa04310	Wnt signaling pathway	12/411	166/8093	0.137541	0.491683	0.424259	DVL3/DVL2/PLCB1/FZD1/NFATC2/FZD7/CTNND2/BAMBI/GPC4/DKK1/MMP7/SFRP5	12	pathway_KEGG	Down
hsa03450	hsa03450	Non-homologous end-joining	2/411	13/8093	0.138808	0.491683	0.424259	FEN1/PRKDC	2	pathway_KEGG	Down
hsa05120	hsa05120	Epithelial cell signaling in Helicobacter pylori infection	6/411	70/8093	0.143679	0.499611	0.4311	SRC/ADAM17/PLCG1/MAPK13/CXCL8/CXCL1	6	pathway_KEGG	Down
hsa04911	hsa04911	Insulin secretion	7/411	86/8093	0.14598	0.499611	0.4311	PLCB1/ATP1B3/ATP1A1/ITPR3/SLC2A1/SNAP25/FXYD2	7	pathway_KEGG	Down
hsa04972	hsa04972	Pancreatic secretion	8/411	102/8093	0.146145	0.499611	0.4311	ATP2B1/PLCB1/ATP1B3/ATP1A1/ITPR3/RAB3D/SCTR/FXYD2	8	pathway_KEGG	Down
GO:0140014	GO:0140014	mitotic nuclear division	78/875	286/18866	1.33789e-38	6.65734e-35	5.34311e-35	NUP62/SGO2/ANLN/BUB1B/KPNB1/KIF2A/SPDL1/KIF23/INCENP/RACGAP1/BUB1/CENPE/KIF20B/NCAPD2/KIF11/NCAPH/PRC1/KIF18A/CENPK/CENPF/CHEK1/MAD2L1/KIF18B/NCAPD3/TRIP13/CDCA8/PLK1/KIF4A/NCAPG/NDE1/FBXO5/DLGAP5/CDK1/KNTC1/MKI67/TPX2/NCAPG2/NUF2/KIF2C/KIF14/NUSAP1/NEK2/CDC6/SMC4/KIFC1/SGO1/TTK/MYBL2/SMC2/CDCA5/CCNB1/ZWINT/CCNB2/TACC3/NDC80/RAD21/TPR/SMC3/PKMYT1/CDC20/ESPL1/PSRC1/SMC1A/BIRC5/UBE2C/CDT1/AURKB/PPP…	78	geneontology_Biological_Process	Down
GO:0000280	GO:0000280	nuclear division	94/875	428/18866	7.20186e-38	1.79182e-34	1.4381e-34	NUP62/SGO2/ANLN/BUB1B/KPNB1/KIF2A/SPDL1/KIF23/INCENP/RACGAP1/BUB1/PSMC3IP/CENPE/KIF20B/NCAPD2/KIF11/FANCD2/NCAPH/PRC1/KIF18A/CENPK/TOP2A/CENPF/CHEK1/MAD2L1/KIF18B/NCAPD3/TRIP13/CDCA8/MASTL/PLK1/KIF4A/NCAPG/NDE1/FBXO5/DLGAP5/CDK1/KNTC1/MKI67/TPX2/NCAPG2/NUF2/KIF2C/KIF14/NUSAP1/RAD54L/NEK2/CDC6/SMC4/KIFC1/EME1/SGO1/TTK/MYBL2/SMC2/CDCA5/CCNB1/RAD51/ZWINT/CCNB2/FIGNL1/TACC3/NDC80/RAD21/TPR/SMC3/ASPM/…	94	geneontology_Biological_Process	Down
GO:0048285	GO:0048285	organelle fission	98/875	476/18866	6.14046e-37	1.0185e-33	8.17435e-34	NUP62/SGO2/ANLN/BUB1B/KPNB1/KIF2A/SPDL1/KIF23/INCENP/RACGAP1/BUB1/PSMC3IP/CENPE/KIF20B/NCAPD2/KIF11/FANCD2/NCAPH/PRC1/KIF18A/CENPK/TOP2A/CENPF/CHEK1/MAD2L1/KIF18B/NCAPD3/TRIP13/CDCA8/MYO19/MASTL/PLK1/KIF4A/NCAPG/NDE1/FBXO5/DLGAP5/CDK1/KNTC1/MKI67/TPX2/NCAPG2/NUF2/KIF2C/KIF14/NUSAP1/RAD54L/NEK2/CDC6/SMC4/KIFC1/EME1/SGO1/TTK/MYBL2/SMC2/CYRIB/CDCA5/CCNB1/RAD51/ZWINT/CCNB2/FIGNL1/TACC3/NDC80/RAD21/TP…	98	geneontology_Biological_Process	Down
GO:0007059	GO:0007059	chromosome segregation	80/875	334/18866	3.87406e-35	4.81933e-32	3.86794e-32	NUP62/SGO2/BUB1B/RCC2/ECT2/KPNB1/SPDL1/KIF23/INCENP/RACGAP1/BUB1/CENPE/NCAPD2/FANCD2/NCAPH/PRC1/KIF18A/CENPK/TOP2A/CENPF/MAD2L1/KIF18B/NCAPD3/TRIP13/CDCA8/PLK1/KIF4A/NCAPG/NDE1/FBXO5/DLGAP5/MKI67/HJURP/NCAPG2/BRCA1/NUF2/KIF2C/KIF14/NUSAP1/NEK2/CDC6/SMC4/CDCA2/KIFC1/EME1/SGO1/TTK/SMC2/CDCA5/CCNB1/ZWINT/CENPH/SKA3/SPC25/FEN1/TACC3/NDC80/RAD21/TPR/OIP5/MIS18A/SKA1/SMC3/CDC20/ESPL1/CENPQ/PSRC1/SMC1A/…	80	geneontology_Biological_Process	Down
GO:0000070	GO:0000070	mitotic sister chromatid segregation	54/875	161/18866	4.77179e-32	4.62574e-29	3.71257e-29	NUP62/SGO2/BUB1B/KPNB1/SPDL1/KIF23/INCENP/RACGAP1/BUB1/CENPE/NCAPD2/NCAPH/PRC1/KIF18A/CENPK/CENPF/MAD2L1/KIF18B/NCAPD3/TRIP13/CDCA8/PLK1/KIF4A/NCAPG/FBXO5/DLGAP5/NCAPG2/NUF2/KIF2C/KIF14/NUSAP1/NEK2/CDC6/SMC4/KIFC1/SGO1/TTK/SMC2/CDCA5/CCNB1/ZWINT/TACC3/NDC80/RAD21/TPR/CDC20/ESPL1/PSRC1/SMC1A/UBE2C/CDT1/AURKB/PTTG1/SPAG5	54	geneontology_Biological_Process	Down
GO:0000819	GO:0000819	sister chromatid segregation	59/875	196/18866	5.57766e-32	4.62574e-29	3.71257e-29	NUP62/SGO2/BUB1B/KPNB1/SPDL1/KIF23/INCENP/RACGAP1/BUB1/CENPE/NCAPD2/NCAPH/PRC1/KIF18A/CENPK/TOP2A/CENPF/MAD2L1/KIF18B/NCAPD3/TRIP13/CDCA8/PLK1/KIF4A/NCAPG/FBXO5/DLGAP5/NCAPG2/NUF2/KIF2C/KIF14/NUSAP1/NEK2/CDC6/SMC4/KIFC1/SGO1/TTK/SMC2/CDCA5/CCNB1/ZWINT/FEN1/TACC3/NDC80/RAD21/TPR/SMC3/CDC20/ESPL1/PSRC1/SMC1A/UBE2C/CDT1/AURKB/STAG1/PTTG1/RMI2/SPAG5	59	geneontology_Biological_Process	Down
GO:0098813	GO:0098813	nuclear chromosome segregation	67/875	272/18866	2.47812e-30	1.76159e-27	1.41383e-27	NUP62/SGO2/BUB1B/RCC2/ECT2/KPNB1/SPDL1/KIF23/INCENP/RACGAP1/BUB1/CENPE/NCAPD2/FANCD2/NCAPH/PRC1/KIF18A/CENPK/TOP2A/CENPF/MAD2L1/KIF18B/NCAPD3/TRIP13/CDCA8/PLK1/KIF4A/NCAPG/FBXO5/DLGAP5/NCAPG2/NUF2/KIF2C/KIF14/NUSAP1/NEK2/CDC6/SMC4/KIFC1/EME1/SGO1/TTK/SMC2/CDCA5/CCNB1/ZWINT/FEN1/TACC3/NDC80/RAD21/TPR/SMC3/CDC20/ESPL1/CENPQ/PSRC1/SMC1A/UBE2C/CDT1/AURKB/STAG1/PTTG1/FAM83D/RMI2/P3H4/SPAG5/CCNE1	67	geneontology_Biological_Process	Down
GO:1902850	GO:1902850	microtubule cytoskeleton organization involved in mitosis	47/875	144/18866	1.93446e-27	1.20323e-24	9.65701e-25	NUP62/KPNB1/KIF2A/SPDL1/KIF23/RACGAP1/CKAP5/CENPE/KIF11/PRC1/MAD2L1/STIL/PLK1/KIF4A/GPSM2/NDE1/DLGAP5/TPX2/NUF2/NUSAP1/NEK2/KIFC1/TTK/MYBL2/WDR62/CCNB1/CENPA/CENPH/ARHGEF2/SPC25/TACC3/NDC80/TPR/SMC3/STMN1/CDC20/ESPL1/PSRC1/SMC1A/BIRC5/SAPCD2/AURKB/STAG1/ITGB1/AURKA/FLNA/MISP	47	geneontology_Biological_Process	Down
GO:0000075	GO:0000075	cell cycle checkpoint	52/875	219/18866	5.62023e-23	3.10736e-20	2.49394e-20	CASP2/BUB1B/SPDL1/CNOT6/BUB1/TOPBP1/GTSE1/RHNO1/FANCD2/TOP2A/CENPF/CHEK1/MAD2L1/TRIP13/MSH2/RFWD3/PLK1/CDK1/KNTC1/BRCA1/CLSPN/ORC1/TP53BP1/CDC6/CDK2/EME1/TTK/CCNB1/ZWINT/DTL/MDC1/E2F8/NDC80/TPR/WDR76/TIMELESS/CDC45/H2AX/CDC20/PRKDC/CDT1/AURKB/TFDP1/SOX4/INTS3/DDX39B/AURKA/CDC25C/E2F1/ARID3A/TGFB1/SFN	52	geneontology_Biological_Process	Down
GO:0007051	GO:0007051	spindle organization	47/875	183/18866	1.97992e-22	9.85208e-20	7.90717e-20	NUP62/KPNB1/KIF2A/KIF23/INCENP/MAPRE1/RACGAP1/HAUS6/CKAP5/CENPE/KIF11/PRC1/STIL/PLK1/KIF4A/GPSM2/FBXO5/DLGAP5/TPX2/NUF2/NEK2/KIFC1/TTK/MYBL2/WDR62/CCNB1/CENPH/SPC25/TACC3/NDC80/TPR/SMC3/ASPM/STMN1/CDC20/ESPL1/PSRC1/SMC1A/BIRC5/AURKB/STAG1/CENPW/AURKA/SPAG5/CHD3/FLNA/MISP	47	geneontology_Biological_Process	Down
GO:0007052	GO:0007052	mitotic spindle organization	38/875	118/18866	3.47e-22	1.5697e-19	1.25982e-19	NUP62/KPNB1/KIF2A/KIF23/RACGAP1/CKAP5/CENPE/KIF11/PRC1/STIL/PLK1/KIF4A/GPSM2/DLGAP5/TPX2/NUF2/NEK2/KIFC1/TTK/MYBL2/WDR62/CCNB1/CENPH/SPC25/TACC3/NDC80/TPR/SMC3/STMN1/CDC20/PSRC1/SMC1A/BIRC5/AURKB/STAG1/AURKA/FLNA/MISP	38	geneontology_Biological_Process	Down
GO:0006260	GO:0006260	DNA replication	56/875	273/18866	2.34442e-21	9.72154e-19	7.8024e-19	POLA1/TOPBP1/GINS1/RHNO1/BARD1/WDHD1/MCM8/CHEK1/RFWD3/MCM6/DHX9/FBXO5/CDK1/MCM2/BRCA1/NAP1L1/POLD1/MCM10/MCM4/CLSPN/ORC1/MCM3/EXO1/CDC6/CDK2/EME1/CHAF1B/GINS4/ORC6/RAD51/RFC4/CDC7/DTL/FEN1/E2F8/PIF1/PCLAF/HMGA1/RBBP8/SMC3/RFC3/TIMELESS/TONSL/CCNA2/CDK2AP1/CDC45/MCM7/RRM2/MCM5/CDT1/RECQL/FAM111B/RMI2/RECQL4/S100A11/CCNE1	56	geneontology_Biological_Process	Down
GO:0007093	GO:0007093	mitotic cell cycle checkpoint	43/875	166/18866	8.77829e-21	3.36006e-18	2.69675e-18	CASP2/BUB1B/SPDL1/CNOT6/BUB1/TOPBP1/GTSE1/FANCD2/TOP2A/CENPF/MAD2L1/TRIP13/MSH2/RFWD3/PLK1/CDK1/KNTC1/BRCA1/CLSPN/ORC1/CDC6/CDK2/EME1/TTK/CCNB1/ZWINT/MDC1/E2F8/NDC80/TPR/CDC20/PRKDC/CDT1/AURKB/TFDP1/SOX4/INTS3/AURKA/CDC25C/E2F1/ARID3A/TGFB1/SFN	43	geneontology_Biological_Process	Down
GO:0051983	GO:0051983	regulation of chromosome segregation	33/875	107/18866	8.70573e-19	3.09427e-16	2.48343e-16	BUB1B/RCC2/ECT2/SPDL1/RACGAP1/BUB1/CENPE/CENPF/MAD2L1/TRIP13/PLK1/FBXO5/DLGAP5/MKI67/KIF2C/NEK2/CDC6/TTK/CDCA5/CCNB1/FEN1/TACC3/NDC80/RAD21/TPR/CDC20/ESPL1/UBE2C/CDT1/AURKB/PTTG1/RMI2/SPAG5	33	geneontology_Biological_Process	Down
GO:0045787	GO:0045787	positive regulation of cell cycle	63/875	396/18866	6.29459e-18	2.08813e-15	1.67591e-15	CASP2/NUP62/RCC2/ECT2/KIF23/CNOT6/RACGAP1/KIF20B/GTSE1/RHNO1/CHEK1/MAD2L1/PLK4/GPSM2/FBXO5/CDK4/DLGAP5/CDK1/EZH2/BRCA1/KIF14/NUSAP1/CDC6/CDK2/SRC/ABL1/CDCA5/CCNB1/ADAM17/CDC7/DTL/FEN1/E2F8/NDC80/RAD21/TPR/CDC25A/CDC45/PLCB1/CSPP1/ESPL1/PSRC1/UBE2C/CDT1/AURKB/TFDP1/CKS2/SOX4/ZNF711/CDC25B/DDX39B/AURKA/FAM83D/CDC25C/E2F1/SPAG5/ASNS/TGFB2/SPHK1/ARID3A/TGFA/FGFR2/SFN	63	geneontology_Biological_Process	Down
GO:0090068	GO:0090068	positive regulation of cell cycle process	54/875	302/18866	8.26687e-18	2.571e-15	2.06345e-15	CASP2/NUP62/RCC2/ECT2/KIF23/CNOT6/RACGAP1/KIF20B/GTSE1/RHNO1/MAD2L1/PLK4/GPSM2/FBXO5/CDK4/DLGAP5/CDK1/EZH2/BRCA1/KIF14/NUSAP1/CDC6/CDK2/CDCA5/CCNB1/ADAM17/CDC7/DTL/FEN1/E2F8/NDC80/RAD21/TPR/CDC25A/CDC45/PLCB1/CSPP1/ESPL1/UBE2C/CDT1/AURKB/TFDP1/SOX4/ZNF711/CDC25B/AURKA/FAM83D/CDC25C/E2F1/SPAG5/SPHK1/ARID3A/TGFA/SFN	54	geneontology_Biological_Process	Down
GO:0071103	GO:0071103	DNA conformation change	59/875	355/18866	8.90503e-18	2.60656e-15	2.09199e-15	NAA40/INCENP/NCAPD2/NCAPH/CENPK/MCM8/TOP2A/BAZ2A/CENPI/DNMT1/NCAPD3/CENPO/MCM6/NCAPG/DHX9/CDK1/CENPL/HJURP/MCM2/NCAPG2/NAP1L1/MCM4/MCM3/NUSAP1/RAD54L/SMC4/CHAF1B/MIS18BP1/ABL1/GINS4/SMC2/CDCA5/HELLS/CCNB1/CENPA/RAD51/RFC4/CENPH/DNMT3A/TPR/PIF1/OIP5/MIS18A/HMGA1/HMGB2/ASF1B/RFC3/H2AX/CENPQ/MCM7/MCM5/CENPM/CENPU/CENPW/RECQL/RECQL4/CHD3/SOX9/MACROH2A2	59	geneontology_Biological_Process	Down
GO:0051783	GO:0051783	regulation of nuclear division	42/875	188/18866	9.49635e-18	2.62521e-15	2.10697e-15	NUP62/ANLN/BUB1B/SPDL1/BUB1/CENPE/KIF20B/KIF11/CENPF/CHEK1/MAD2L1/TRIP13/PLK1/FBXO5/DLGAP5/KNTC1/MKI67/NUSAP1/NEK2/CDC6/TTK/CDCA5/CCNB1/TACC3/NDC80/RAD21/TPR/PKMYT1/CDC20/PLCB1/ESPL1/UBE2C/CDT1/AURKB/PPP1R9B/ZNF711/PTTG1/AURKA/CDC25C/SPHK1/TGFA/LIF	42	geneontology_Biological_Process	Down
GO:0051321	GO:0051321	meiotic cell cycle	49/875	254/18866	1.13475e-17	2.84699e-15	2.28496e-15	SGO2/BUB1B/INCENP/BUB1/PSMC3IP/XRCC2/NCAPD2/FANCD2/NCAPH/KIF18A/TOP2A/NCAPD3/TRIP13/MASTL/PLK1/FBXO5/NUF2/RAD54L/EXO1/NEK2/CDK2/SMC4/EME1/SGO1/TTK/SMC2/RAD51/FIGNL1/RAD21/SPIN1/RBBP8/SMC3/CDC25A/ASPM/PKMYT1/H2AX/CDC20/PLCB1/ESPL1/SMC1A/CKS2/ZNF711/CDC25B/PTTG1/AURKA/CDC25C/P3H4/CCNE1/LIF	49	geneontology_Biological_Process	Down
GO:0007088	GO:0007088	regulation of mitotic nuclear division	39/875	163/18866	1.14429e-17	2.84699e-15	2.28496e-15	NUP62/ANLN/BUB1B/SPDL1/BUB1/CENPE/KIF20B/KIF11/CENPF/CHEK1/MAD2L1/TRIP13/PLK1/FBXO5/DLGAP5/KNTC1/MKI67/NUSAP1/NEK2/CDC6/TTK/CDCA5/CCNB1/TACC3/NDC80/RAD21/TPR/PKMYT1/CDC20/ESPL1/UBE2C/CDT1/AURKB/PPP1R9B/PTTG1/AURKA/CDC25C/SPHK1/TGFA	39	geneontology_Biological_Process	Down
GO:1901990	GO:1901990	regulation of mitotic cell cycle phase transition	67/875	448/18866	1.46876e-17	3.48025e-15	2.79321e-15	CASP2/ANLN/BUB1B/RCC2/SPDL1/CNOT6/MAPRE1/RBL1/BUB1/HAUS6/CKAP5/TOPBP1/CENPE/GTSE1/NEDD1/CENPF/MAD2L1/TRIP13/RFWD3/PLK4/PLK1/NDE1/FBXO5/CDK4/DLGAP5/CDK1/KNTC1/EZH2/TPX2/BRCA1/CLSPN/ORC1/KIF14/NEK2/CDC6/CDK2/TTK/CDCA5/CCNB1/ADAM17/CDC7/DTL/E2F8/NDC80/RAD21/TPR/DYNC1I2/CDC25A/CDC45/CDC20/HMMR/PRKDC/PLCB1/ESPL1/UBE2C/CDT1/AURKB/PPP1R9B/TFDP1/SOX4/CDC25B/AURKA/CDC25C/E2F1/ARID3A/UBD/SFN	67	geneontology_Biological_Process	Down
GO:1901987	GO:1901987	regulation of cell cycle phase transition	70/875	486/18866	2.08903e-17	4.725e-15	3.79224e-15	CASP2/ANLN/BUB1B/RCC2/SPDL1/CNOT6/MAPRE1/RBL1/BUB1/HAUS6/CKAP5/TOPBP1/CENPE/GTSE1/NEDD1/CENPF/CHEK1/MAD2L1/TRIP13/RFWD3/PLK4/PLK1/NDE1/FBXO5/CDK4/DLGAP5/CDK1/KNTC1/EZH2/TPX2/BRCA1/CLSPN/ORC1/KIF14/NEK2/CDC6/CDK2/TTK/CDCA5/CCNB1/ADAM17/CDC7/DTL/E2F8/NDC80/RAD21/TPR/DYNC1I2/CDC25A/CDC45/CDC20/HMMR/PRKDC/PLCB1/ESPL1/UBE2C/CDT1/AURKB/PPP1R9B/TFDP1/SOX4/CDC25B/AURKA/FAM83D/CDC25C/E2F1/ARID3A/PLPP2/UBD…	70	geneontology_Biological_Process	Down
GO:0044843	GO:0044843	cell cycle G1/S phase transition	53/875	310/18866	1.24875e-16	2.70165e-14	2.16831e-14	CASP2/CNOT6/POLA1/RBL1/GTSE1/CDK16/MCM8/E2F3/RFWD3/MCM6/FBXO5/CDK4/CDK1/EZH2/MCM2/MCM10/MCM4/ORC1/MCM3/KIF14/CDC6/CDK2/ORC6/CCNB1/ADAM17/ACVR1/CDC7/E2F8/RBBP8/CDC25A/CCNA2/CDC45/PRKDC/PLCB1/MCM7/RRM2/MCM5/TYMS/CDT1/TFDP1/IQGAP3/CDKN3/SOX4/SKP2/ITGB1/AURKA/FAM83D/CDC25C/E2F1/ARID3A/CCNE1/PLPP2/SFN	53	geneontology_Biological_Process	Down
GO:0031570	GO:0031570	DNA integrity checkpoint	37/875	161/18866	3.23307e-16	6.70323e-14	5.37994e-14	CASP2/CNOT6/TOPBP1/GTSE1/RHNO1/FANCD2/TOP2A/CHEK1/MSH2/RFWD3/PLK1/CDK1/BRCA1/CLSPN/ORC1/TP53BP1/CDC6/CDK2/EME1/CCNB1/DTL/MDC1/E2F8/WDR76/TIMELESS/CDC45/H2AX/PRKDC/CDT1/TFDP1/SOX4/DDX39B/AURKA/CDC25C/E2F1/ARID3A/SFN	37	geneontology_Biological_Process	Down
GO:0000082	GO:0000082	G1/S transition of mitotic cell cycle	50/875	287/18866	4.2213e-16	8.40207e-14	6.74341e-14	CASP2/CNOT6/POLA1/RBL1/GTSE1/CDK16/MCM8/E2F3/RFWD3/MCM6/FBXO5/CDK4/CDK1/EZH2/MCM2/MCM10/MCM4/ORC1/MCM3/KIF14/CDC6/CDK2/ORC6/CCNB1/ADAM17/ACVR1/CDC7/E2F8/RBBP8/CDC25A/CDC45/PRKDC/PLCB1/MCM7/RRM2/MCM5/TYMS/CDT1/TFDP1/IQGAP3/CDKN3/SOX4/SKP2/ITGB1/AURKA/CDC25C/E2F1/ARID3A/CCNE1/SFN	50	geneontology_Biological_Process	Down
GO:0051304	GO:0051304	chromosome separation	28/875	94/18866	1.04899e-15	2.0076e-13	1.61128e-13	BUB1B/SPDL1/BUB1/CENPE/NCAPD2/NCAPH/TOP2A/CENPF/MAD2L1/NCAPD3/TRIP13/PLK1/FBXO5/DLGAP5/CDC6/EME1/TTK/CCNB1/TACC3/NDC80/RAD21/TPR/CDC20/ESPL1/UBE2C/CDT1/AURKB/PTTG1	28	geneontology_Biological_Process	Down
GO:0010965	GO:0010965	regulation of mitotic sister chromatid separation	23/875	61/18866	1.11833e-15	2.06103e-13	1.65416e-13	BUB1B/SPDL1/BUB1/CENPE/CENPF/MAD2L1/TRIP13/PLK1/FBXO5/DLGAP5/CDC6/TTK/CCNB1/TACC3/NDC80/RAD21/TPR/CDC20/ESPL1/UBE2C/CDT1/AURKB/PTTG1	23	geneontology_Biological_Process	Down
GO:0006261	GO:0006261	DNA-dependent DNA replication	35/875	151/18866	1.55472e-15	2.76296e-13	2.21753e-13	POLA1/TOPBP1/GINS1/WDHD1/RFWD3/MCM6/FBXO5/MCM2/POLD1/MCM10/MCM4/ORC1/MCM3/CDC6/CDK2/EME1/GINS4/ORC6/RAD51/RFC4/CDC7/FEN1/E2F8/HMGA1/RFC3/TIMELESS/TONSL/CDK2AP1/CDC45/MCM7/MCM5/CDT1/RECQL/RECQL4/CCNE1	35	geneontology_Biological_Process	Down
GO:0051306	GO:0051306	mitotic sister chromatid separation	23/875	64/18866	3.82766e-15	6.4977e-13	5.21498e-13	BUB1B/SPDL1/BUB1/CENPE/CENPF/MAD2L1/TRIP13/PLK1/FBXO5/DLGAP5/CDC6/TTK/CCNB1/TACC3/NDC80/RAD21/TPR/CDC20/ESPL1/UBE2C/CDT1/AURKB/PTTG1	23	geneontology_Biological_Process	Down
GO:0033045	GO:0033045	regulation of sister chromatid segregation	26/875	84/18866	3.94194e-15	6.4977e-13	5.21498e-13	BUB1B/SPDL1/BUB1/CENPE/CENPF/MAD2L1/TRIP13/PLK1/FBXO5/DLGAP5/CDC6/TTK/CDCA5/CCNB1/FEN1/TACC3/NDC80/RAD21/TPR/CDC20/ESPL1/UBE2C/CDT1/AURKB/PTTG1/RMI2	26	geneontology_Biological_Process	Down
GO:0007091	GO:0007091	metaphase/anaphase transition of mitotic cell cycle	22/875	58/18866	4.048e-15	6.4977e-13	5.21498e-13	BUB1B/SPDL1/BUB1/CENPE/CENPF/MAD2L1/TRIP13/PLK1/FBXO5/DLGAP5/CDC6/TTK/CCNB1/TACC3/NDC80/RAD21/TPR/CDC20/ESPL1/UBE2C/CDT1/AURKB	22	geneontology_Biological_Process	Down
GO:1903046	GO:1903046	meiotic cell cycle process	39/875	193/18866	5.03648e-15	7.83172e-13	6.28565e-13	SGO2/BUB1B/INCENP/BUB1/PSMC3IP/NCAPD2/FANCD2/NCAPH/KIF18A/TOP2A/NCAPD3/TRIP13/MASTL/PLK1/FBXO5/NUF2/RAD54L/SMC4/EME1/SGO1/TTK/SMC2/RAD51/FIGNL1/RAD21/CDC25A/ASPM/CDC20/PLCB1/ESPL1/CKS2/ZNF711/CDC25B/PTTG1/AURKA/CDC25C/P3H4/CCNE1/LIF	39	geneontology_Biological_Process	Down
[truncated: 2,486 more rows]
