# Supplementary material for: A Mitophagy-Related Gene Signature for Subtype Identification and Prognosis Prediction of Hepatocellular Carcinoma
Source: Int J Mol Sci. 2022 Oct 12;23(20):12123. doi: 10.3390/ijms232012123 (PMC9603050; doi:10.3390/ijms232012123)
Supplement: Supplementary file 1 [file ijms-23-12123-s001.zip › Table S3.xlsx]

## Sheet: Table S3
Table S3 Genes of p53 signaling pathway and cell cycle.

## Sheet: Table S3_1
Table S3_1 Genes of p53 signaling pathway.
Genes	p.value	HR	Low 95%CI	High 95%CI
GTSE1	0.0230459	1.49449	1.05684	2.11337
CHEK1	0.00031151	1.91014	1.34363	2.71551
CDK4	0.000108062	2.01325	1.41273	2.86905
CDK1	7.4759e-05	2.04804	1.43638	2.92018
CDK2	0.0320782	1.46035	1.03294	2.06461
CCNB1	0.000575895	1.85542	1.30502	2.63795
CCNB2	0.0807389	1.36351	0.962795	1.93101
RRM2	0.00214608	1.72994	1.21907	2.45491
CCNE1	0.0068562	1.62153	1.14222	2.30197
THBS1	0.517176	1.12064	0.793921	1.58182
SERPINE1	0.0425	1.43295	1.01224	2.02851
SFN	0.00115515	1.7935	1.26093	2.55101

## Sheet: Table S3_2
Table S3_2 Genes of cell cycle.
Genes	p.value	HR	Low 95%CI	High 95%CI
PKMYT1	0.00427779	1.663	1.17314	2.3574
RBL1	0.0178815	1.52258	1.07514	2.15623
BUB1	0.000589949	1.85414	1.30376	2.63687
CHEK1	0.00031151	1.91014	1.34363	2.71551
MAD2L1	0.0164326	1.52878	1.0808	2.16245
PLK1	0.00171706	1.76256	1.23672	2.51198
MCM6	0.00289937	1.69941	1.19878	2.40912
CDK4	0.000108062	2.01325	1.41273	2.86905
CDK1	7.4759e-05	2.04804	1.43638	2.92018
MCM2	0.0012528	1.77694	1.25317	2.51962
YWHAQ	0.0071494	1.61371	1.13865	2.28696
ORC1	0.0019958	1.73592	1.2236	2.46275
MCM3	0.000459047	1.8754	1.31923	2.66604
CDC6	0.00364536	1.67569	1.18319	2.37319
CDK2	0.0320782	1.46035	1.03294	2.06461
TTK	0.00475481	1.65127	1.16574	2.33903
ABL1	0.0254167	1.48376	1.04976	2.09718
ORC6	0.008432	1.59402	1.12676	2.25503
CCNB1	0.000575895	1.85542	1.30502	2.63795
CDC7	0.00132293	1.77206	1.2497	2.51274
CDC25A	0.000481344	1.86647	1.31479	2.64963
CCNA2	0.00564941	1.6376	1.15479	2.32228
CDC45	0.00380403	1.67386	1.18087	2.37265
YWHAZ	0.0198909	1.51174	1.06758	2.1407
CDC20	4.34728e-06	2.32194	1.62094	3.32609
PRKDC	0.0447749	1.42759	1.00834	2.02117
ESPL1	0.00619724	1.62785	1.14838	2.30751
SMC1A	0.0153363	1.5372	1.08584	2.17616
MCM7	0.000222582	1.94672	1.36684	2.77261
MCM5	0.0322612	1.4633	1.03274	2.07335
CDC25B	0.00297947	1.70393	1.19868	2.42214
SKP2	0.0411999	1.43427	1.01451	2.02771
PTTG1	6.74952e-05	2.06252	1.44465	2.94463
CDC25C	0.000320322	1.90955	1.34249	2.71615
E2F1	0.0016702	1.75648	1.23624	2.49564
CCNE1	0.0068562	1.62153	1.14222	2.30197
SFN	0.00115515	1.7935	1.26093	2.55101
