# Supplementary material for: A Mitophagy-Related Gene Signature for Subtype Identification and Prognosis Prediction of Hepatocellular Carcinoma
Source: Int J Mol Sci. 2022 Oct 12;23(20):12123. doi: 10.3390/ijms232012123 (PMC9603050; doi:10.3390/ijms232012123)
Supplement: Supplementary file 1 [file ijms-23-12123-s001.zip › Table S4.xlsx]

## Sheet: Table S4
Table S4 Immune activity and tumor stemness between HCC subgroups.

## Sheet: Table S4_1
Table S4_1 Heatmap and the boxplots of immune activity between HCC subgroups.
Patients	B cell	T cell CD4+	T cell CD8+	Endothelial cell	Macrophage	NK cell	uncharacterized cell	Groups
TCGA-G3-AAV0-01	0.000116576	2.27001e-05	0.000419543	0.00535566	0.993638	1.70392e-07	5.57004e-09	C1
TCGA-DD-AAE3-01	0.0296534	1.79507e-05	0.0738483	0.461995	0.428229	0.00623136	7.91325e-06	C1
TCGA-DD-A11D-01	7.01059e-07	0.0237672	0.000269455	0.00688413	0.258005	1.56005e-06	0.706133	C1
TCGA-G3-A6UC-01	0.0021064	0.0175075	3.2843e-05	0.00077111	0.337967	0.000112534	0.640322	C1
TCGA-K7-A6G5-01	3.12039e-05	0.0370654	0.000115836	1.85454e-05	0.813262	0.000499966	0.143319	C1
TCGA-DD-AAE4-01	1.31443e-05	3.0142e-07	0.000317097	0.00120918	0.996488	0.00150347	7.55194e-07	C1
TCGA-MI-A75G-01	1.12333e-06	0.000514329	1.99746e-06	0.00010613	0.999282	9.78791e-06	1.1901e-08	C1
TCGA-DD-AADV-01	1.50401e-05	0.0256919	0.0014476	5.4954e-06	0.505957	0.000757557	0.441659	C1
TCGA-LG-A9QD-01	0.000543073	0.0120348	8.04674e-06	1.00672e-06	0.272193	5.19151e-05	0.714788	C1
TCGA-DD-AACD-01	0.0216732	0.285829	0.0758574	0.127835	0.479668	0.00266026	7.43181e-07	C1
TCGA-DD-AAE7-01	0.0129074	0.00760312	5.86616e-06	0.0344196	0.882348	0.0375249	5.66882e-07	C1
TCGA-DD-AADJ-01	0.0161383	0.0759732	5.47689e-05	3.65362e-06	0.874211	0.000941108	0.0326486	C1
TCGA-CC-5259-01	0.000530478	2.46805e-05	2.45557e-05	0.000612364	0.996737	1.96765e-05	4.73566e-06	C1
TCGA-HP-A5MZ-01	0.000535324	0.0488089	6.47465e-05	5.07997e-06	0.427111	8.14354e-07	0.497457	C1
TCGA-DD-A39X-01	4.73085e-06	0.000392767	4.8127e-06	6.65604e-05	0.212359	0.00154174	0.783302	C1
TCGA-2Y-A9GU-01	0.00160047	0.0245924	2.22121e-05	2.78187e-07	0.141841	3.51051e-07	0.83088	C1
TCGA-G3-A7M8-01	0.0230947	0.0287131	0.615139	0.000404378	0.332047	0.000217816	0.000122952	C1
TCGA-DD-A3A5-01	9.951e-06	0.0257407	0.000172185	7.18038e-05	0.722964	0.00109353	0.244895	C1
TCGA-DD-AADM-01	0.0208643	0.0015091	1.20793e-05	0.00139752	0.946961	0.0182917	5.88897e-06	C1
TCGA-DD-AADU-01	7.08814e-07	0.161055	0.00340612	0.000742197	0.828667	0.00541929	0.000709112	C1
TCGA-CC-A7IF-01	2.59068e-06	0.0037945	2.92244e-06	0.00161646	0.993027	4.88277e-06	1.47043e-06	C1
TCGA-DD-AAVW-01	1.72206e-05	0.0357624	4.81498e-06	0.0099743	0.132124	1.41211e-06	0.785105	C1
TCGA-DD-A3A7-01	1.21368e-05	0.000215749	3.86603e-05	8.14147e-06	0.56861	0.00286528	0.424819	C1
TCGA-EP-A2KA-01	0.000958655	0.0184338	2.67569e-05	4.17452e-06	0.118798	2.56647e-06	0.860125	C1
TCGA-ED-A7PZ-01	4.45762e-05	0.00156284	0.000309797	0.000169182	0.282589	0.000530949	0.710968	C1
TCGA-G3-A25U-01	0.000589453	0.0392715	3.65181e-05	4.27223e-05	0.794633	0.00122737	0.164182	C1
TCGA-2Y-A9GZ-01	2.53563e-06	0.0141523	2.22938e-06	0.0213116	0.12245	3.26944e-05	0.840887	C1
TCGA-DD-AADK-01	9.20312e-07	0.0258962	0.000618438	0.00142835	0.535967	0.0011916	0.424639	C1
TCGA-G3-A5SI-01	8.66308e-07	4.04407e-05	2.54927e-05	0.000302366	0.998297	0.000154322	3.18912e-08	C1
TCGA-DD-A4NI-01	4.34839e-06	0.00116515	4.86951e-05	0.00578605	0.990121	0.000560297	0.00230239	C1
TCGA-DD-A73A-01	0.000118885	0.0908524	7.59143e-05	3.99172e-05	0.863808	3.31752e-05	0.0446037	C1
TCGA-ZS-A9CG-01	0.000176257	0.0335716	6.86897e-06	1.93752e-05	0.745629	0.000533084	0.219414	C1
TCGA-FV-A4ZP-01	0.00116192	0.00157025	0.00417873	9.04649e-06	0.435165	0.000165795	0.553454	C1
TCGA-DD-AACJ-01	0.000907901	0.000532993	0.0593368	0.088602	0.841066	0.000334076	0.000220547	C1
TCGA-DD-AAVZ-01	1.20667e-05	0.0364469	9.42398e-05	9.10835e-07	0.645916	0.000292974	0.312097	C1
TCGA-DD-AAVR-01	0.00166784	0.0181889	0.0562536	6.83995e-05	0.899533	8.65335e-05	3.23527e-05	C1
TCGA-RC-A7SB-01	0.00277464	0.0279749	2.62171e-05	1.02945e-05	0.579591	0.000576908	0.385228	C1
TCGA-3K-AAZ8-01	1.49557e-05	0.0460819	3.37917e-05	0.00195545	0.682428	0.000791791	0.268684	C1
TCGA-UB-A7MF-01	8.62454e-05	0.0277307	1.17849e-06	9.4428e-06	0.128382	0.00177698	0.839869	C1
TCGA-ZP-A9D1-01	4.58963e-05	0.0388607	2.11407e-05	3.97782e-05	0.39656	0.000105747	0.544349	C1
TCGA-ZP-A9D0-01	1.41648e-05	0.0432303	3.76217e-06	1.95479e-06	0.147583	0.000210706	0.804736	C1
TCGA-WQ-AB4B-01	4.99528e-07	0.00089856	4.69991e-05	0.000578804	0.998061	0.000278629	2.69746e-08	C1
TCGA-NI-A4U2-01	0.0395969	0.136329	0.275294	0.282438	0.266034	0.000295986	3.71321e-06	C1
TCGA-RC-A7SK-01	8.76171e-05	4.12232e-05	3.94131e-05	5.46473e-05	0.999514	0.000208902	1.50247e-05	C1
TCGA-DD-AADS-01	4.60532e-05	3.57666e-05	3.19681e-05	1.82565e-06	0.998999	0.000487838	5.82492e-08	C1
TCGA-DD-A73F-01	0.00209697	0.0598341	0.000166813	2.61379e-06	0.884046	2.41602e-05	0.0503128	C1
TCGA-DD-A11C-01	2.76779e-05	0.0537781	2.37472e-05	0.000383178	0.339323	5.55902e-07	0.590063	C1
TCGA-DD-AACO-01	0.000430571	0.000436314	0.000250877	0.677032	0.321821	1.25558e-05	4.17736e-06	C1
TCGA-DD-AAED-01	3.28338e-05	2.73283e-05	2.91051e-05	4.34302e-05	0.998911	0.000829749	1.15446e-05	C1
TCGA-BC-A10X-01	0.00105285	0.0279389	0.000625672	0.0142103	0.527198	1.12122e-06	0.390421	C1
TCGA-DD-AAD3-01	0.000710033	0.042286	1.27133e-05	1.681e-07	0.430539	0.000133699	0.48819	C1
TCGA-K7-A5RG-01	0.041038	0.0928972	0.000124832	1.75578e-06	0.558095	0.000310596	0.297134	C1
TCGA-DD-AACF-01	6.00169e-05	1.03329e-05	5.57695e-05	4.46419e-06	0.999685	9.64008e-06	0.00017341	C1
TCGA-DD-A3A2-01	6.14864e-05	0.000280554	5.58237e-06	9.78626e-07	0.99952	0.000130285	6.28938e-07	C1
TCGA-DD-A115-01	0.0595046	0.0279076	0.000523323	0.000954294	0.8968	0.000292635	0.000164566	C1
TCGA-DD-AADO-01	3.75494e-05	8.40476e-06	3.90324e-05	2.81312e-05	0.999542	0.000324891	1.94648e-05	C1
TCGA-BC-A110-01	0.000576995	0.0207953	1.86874e-05	1.32839e-05	0.422569	1.16212e-05	0.53771	C1
TCGA-DD-AAW3-01	0.000126305	0.000389528	4.47551e-06	0.00015159	0.999296	1.59808e-07	5.05765e-07	C1
TCGA-2Y-A9H7-01	0.00209875	0.0147308	1.94262e-05	0.00030183	0.393017	1.61262e-07	0.587676	C1
TCGA-RC-A6M5-01	3.83345e-05	0.0221902	2.30267e-06	0.041865	0.15746	4.08106e-05	0.741505	C1
TCGA-BC-A69H-01	3.25264e-06	0.00878356	2.65975e-06	6.28409e-06	0.275081	0.00029014	0.710978	C1
TCGA-BC-A69I-01	6.75182e-05	0.010734	1.84075e-05	0.00022549	0.851571	8.29689e-06	0.13174	C1
TCGA-ED-A627-01	1.64487e-05	0.0554719	2.27413e-06	0.00040855	0.299169	5.12761e-05	0.543226	C1
TCGA-DD-AACC-01	0.0198897	0.0386544	0.000127159	4.65838e-06	0.513487	0.000519697	0.419825	C1
TCGA-DD-A3A9-01	0.00146336	3.67881e-06	1.01831e-07	0.000596366	0.962342	0.000117571	5.90095e-06	C1
TCGA-ES-A2HT-01	0.000311341	0.0388276	4.67013e-05	3.96013e-07	0.866093	6.88973e-06	0.0875546	C1
TCGA-2Y-A9H3-01	0.0662756	0.0215151	0.0708282	0.000541499	0.820633	0.0191468	0.000363607	C1
TCGA-2Y-A9HB-01	1.21936e-05	0.0295949	2.91541e-05	6.08228e-05	0.954643	3.04978e-05	0.000112929	C1
TCGA-DD-A3A6-01	0.000502911	0.0345783	4.83544e-06	0.0446114	0.21702	0.000356095	0.655611	C1
TCGA-BW-A5NO-01	0.000380808	0.00586731	0.000105634	0.000745086	0.388849	1.5198e-07	0.602512	C1
TCGA-CC-A7IL-01	0.0057697	0.0229609	1.89242e-05	0.000644542	0.940702	0.000377415	0.0295268	C1
TCGA-DD-AACV-01	2.15337e-06	0.0277124	4.4616e-05	0.000414151	0.194045	1.17225e-07	0.774839	C1
TCGA-KR-A7K2-01	2.69984e-07	8.35299e-07	4.18714e-06	9.0043e-05	0.999811	2.53252e-06	3.47549e-05	C1
TCGA-DD-AAEG-01	0.00039447	0.00283218	4.72706e-05	0.000888953	0.22133	0.000934403	0.767454	C1
TCGA-DD-AACG-01	0.00614113	0.00397747	0.000296928	0.00155556	0.965933	0.021219	0.000151758	C1
TCGA-CC-A123-01	8.51728e-06	0.000980973	2.47086e-05	0.00103322	0.997057	1.37894e-06	2.57018e-08	C1
TCGA-DD-AAVQ-01	0.0430263	0.0381941	1.41926e-05	0.000242256	0.445444	2.00876e-05	0.463532	C1
TCGA-RC-A7S9-01	0.00231043	7.66403e-05	0.000938993	0.000409828	0.995593	0.000550713	3.76001e-05	C1
TCGA-DD-A4NK-01	3.19554e-06	0.0117263	1.06774e-05	3.40824e-05	0.3938	0.00133381	0.590541	C1
TCGA-DD-AADI-01	0.000655325	0.0306796	1.04219e-05	5.86712e-06	0.22974	0.000360213	0.730476	C1
TCGA-DD-AACY-01	2.19101e-05	0.0224199	2.49344e-05	0.000487059	0.655509	4.2428e-05	0.321348	C1
TCGA-DD-AAW0-01	0.000344631	0.0454705	0.000101156	1.10507e-05	0.494245	0.000982574	0.409375	C1
TCGA-5R-AAAM-01	3.79965e-06	0.0392082	9.42117e-05	1.25408e-05	0.446433	0.000236678	0.470332	C1
TCGA-ZS-A9CF-01	2.87598e-06	0.0155131	0.000133757	0.000239475	0.239135	6.205e-05	0.744273	C1
TCGA-DD-AACI-01	3.45954e-06	0.0234145	0.000155475	0.000721103	0.330988	3.38774e-05	0.642037	C1
TCGA-EP-A3JL-01	5.16078e-05	0.0331625	1.86806e-06	9.5377e-06	0.637992	0.000916574	0.318933	C1
TCGA-ES-A2HS-01	0.0305347	1.55079e-05	0.00401949	0.00177892	0.951106	0.0125249	3.34965e-06	C1
TCGA-DD-A119-01	0.00121978	0.000385478	0.000854178	1.22106e-05	0.997525	8.14021e-08	6.68489e-08	C1
TCGA-2Y-A9H1-01	6.44477e-06	1.37544e-06	3.91344e-05	0.000149412	0.999801	3.57783e-07	1.39364e-06	C1
TCGA-G3-A5SK-01	0.000310963	1.91848e-05	1.90119e-05	5.89685e-05	0.999535	2.84074e-05	8.74587e-06	C1
TCGA-DD-AAE1-01	0.000650291	0.0214311	2.09155e-05	1.79662e-05	0.165829	8.10202e-06	0.811421	C1
TCGA-DD-AADN-01	1.01602e-05	0.0269522	7.71854e-07	3.1857e-07	0.277725	2.5863e-05	0.694259	C1
TCGA-DD-A73C-01	2.88322e-05	0.152726	0.188661	4.7628e-05	0.640846	4.02441e-06	0.0134236	C1
TCGA-FV-A495-01	0.00162071	3.28836e-05	9.67737e-06	0.00169602	0.995694	0.000659441	6.26423e-08	C1
TCGA-DD-A1EK-01	0.0007074	0.00402312	3.27166e-06	0.00134638	0.230901	0.00100628	0.757459	C1
TCGA-DD-AAD6-01	0.000184804	0.0539947	8.25417e-05	0.000454029	0.660488	3.45958e-06	0.28479	C1
TCGA-G3-A3CH-01	0.0198427	0.000930127	0.000852249	0.00360037	0.955036	0.00980527	0.000577743	C1
TCGA-DD-AAEA-01	0.000256802	1.7379e-05	0.000351881	4.47757e-05	0.997751	0.000948914	1.74645e-06	C1
TCGA-CC-A7IH-01	1.27526e-05	0.0554292	6.14405e-05	2.17508e-05	0.672351	0.000493715	0.269083	C1
TCGA-MI-A75H-01	5.77186e-05	0.00343186	0.0126967	2.54126e-05	0.954566	0.0208549	2.18228e-07	C1
TCGA-DD-AAD8-01	0.000310276	0.0947321	0.0028597	0.0152158	0.884218	0.00148424	1.63088e-07	C1
TCGA-DD-A73D-01	0.000177647	1.72383e-06	1.47426e-05	6.38069e-07	0.999271	0.0004916	3.65838e-05	C1
TCGA-K7-A5RF-01	4.92147e-07	0.0440632	0.00264511	0.000452308	0.457448	8.64814e-06	0.485448	C1
TCGA-DD-AACT-01	0.000237477	0.0484786	0.00326537	0.0001955	0.728201	1.10316e-05	0.206004	C1
TCGA-DD-A73B-01	0.0330903	0.000338439	2.81117e-05	0.000684291	0.948981	0.0168282	1.18976e-05	C1
TCGA-DD-A4NO-01	5.93013e-05	0.332203	0.0271904	9.06271e-07	0.639691	0.0004564	0.000395022	C1
TCGA-2Y-A9H8-01	2.35159e-05	0.0194266	1.23984e-05	1.79963e-05	0.108337	4.76652e-07	0.86835	C1
TCGA-DD-A3A8-01	0.000159663	1.21215e-06	0.000275699	4.0646e-06	0.999556	2.98302e-07	2.49314e-06	C1
TCGA-RC-A7SF-01	0.000491474	3.0607e-07	5.06431e-05	8.80562e-07	0.99907	4.00127e-08	0.00030931	C1
TCGA-HP-A5N0-01	0.359516	0.254184	0.00198109	0.0188852	0.349894	0.0154554	1.35903e-05	C1
TCGA-DD-A73E-01	3.04872e-05	0.0316727	7.85137e-05	1.38512e-05	0.177395	2.65834e-06	0.790632	C1
TCGA-G3-A5SL-01	0.415625	0.00205619	0.0685084	0.000246308	0.44649	0.0669942	1.31948e-05	C1
TCGA-2Y-A9H6-01	2.83537e-05	0.021877	0.000592103	0.00470216	0.932505	3.35034e-05	6.05014e-05	C1
TCGA-WX-AA47-01	1.38233e-06	0.000236659	9.28604e-08	0.131337	0.0889352	5.18352e-08	0.779061	C1
TCGA-MR-A520-01	0.000634892	0.0574659	6.50789e-06	7.20309e-05	0.340826	5.37562e-06	0.600734	C1
TCGA-DD-A3A1-01	0.187567	0.00297318	0.0466364	0.000245	0.714577	0.0470271	7.38701e-08	C1
TCGA-DD-AADF-01	0.000395967	0.000402986	0.00126084	0.000394632	0.994536	0.00248549	8.23381e-05	C1
TCGA-G3-A7M7-01	0.00412657	0.0250849	0.00106652	3.33771e-06	0.31231	7.04809e-05	0.654624	C1
TCGA-DD-AADQ-01	1.70234e-06	0.00389183	4.7898e-05	3.90579e-06	0.140632	0.000317825	0.854722	C1
TCGA-DD-AAVX-01	0.00395275	0.0237995	2.29931e-05	0.00308578	0.292671	1.32538e-06	0.675034	C1
TCGA-MI-A75E-01	0.0455756	7.66757e-05	3.49237e-05	0.0669025	0.884242	0.00189531	4.05098e-07	C1
TCGA-DD-A11B-01	0.000121265	0.0766137	2.23133e-06	1.09103e-05	0.219877	6.11528e-05	0.700856	C1
TCGA-LG-A6GG-01	1.69204e-06	0.000390063	0.00505422	0.000119944	0.263259	0.00151479	0.729261	C1
TCGA-DD-A39V-01	0.0118672	0.00230142	0.00308819	0.00264607	0.975413	0.00298594	0.000334683	C1
TCGA-ZP-A9CY-01	0.00881887	0.169497	0.0586417	0.18203	0.567724	7.90425e-05	4.1284e-06	C1
TCGA-NI-A8LF-01	0.000301919	0.0337901	3.63248e-06	0.0109919	0.363369	3.43985e-06	0.58089	C1
TCGA-DD-AAE2-01	7.2103e-06	0.027635	5.95411e-05	4.76623e-06	0.285782	3.02289e-06	0.67736	C1
TCGA-KR-A7K8-01	7.53904e-05	0.0205579	1.88766e-05	0.0020157	0.185066	0.000382748	0.784611	C1
TCGA-EP-A12J-01	8.02205e-05	0.0170415	1.1197e-05	0.000398379	0.152505	7.46143e-05	0.829889	C1
TCGA-DD-A4NV-01	1.8104e-05	0.0443379	4.18234e-06	0.000897298	0.27578	4.56275e-06	0.662654	C1
TCGA-BC-A3KF-01	5.84546e-05	0.0161053	1.00479e-05	3.40706e-07	0.156433	9.34791e-07	0.824639	C1
TCGA-G3-A3CK-01	0.000136297	0.0269864	3.96928e-06	0.00229683	0.288598	2.78148e-07	0.680905	C1
TCGA-ZS-A9CE-01	2.97023e-05	0.174932	0.000105766	0.00201222	0.81571	0.000499665	0.00670334	C1
TCGA-DD-AADA-01	0.00491833	0.0212987	0.0124364	2.46066e-06	0.709606	4.69776e-05	0.242084	C1
TCGA-G3-A25X-01	4.57666e-05	0.0133011	2.07652e-05	0.0077983	0.100905	0.00488856	0.862899	C1
TCGA-2Y-A9H5-01	1.70716e-05	0.0676458	4.22675e-05	0.000756091	0.310195	1.38908e-06	0.576141	C1
TCGA-G3-A3CG-01	7.13178e-06	3.78028e-06	0.000864991	0.000594857	0.985777	1.19191e-05	0.000213338	C1
TCGA-ED-A4XI-01	0.0292683	0.198015	0.13901	0.152889	0.424801	3.70404e-06	8.75383e-07	C1
TCGA-2Y-A9GT-01	6.97607e-06	0.0889012	7.18527e-06	1.80197e-05	0.614295	1.0706e-05	0.288769	C1
TCGA-DD-A1EB-01	1.67055e-07	0.0250364	0.00075854	0.000891397	0.968571	9.34595e-06	1.24162e-06	C1
TCGA-DD-AACE-01	2.61266e-05	0.0234045	5.67925e-06	1.07793e-05	0.274313	3.093e-06	0.70122	C1
TCGA-2Y-A9H9-01	0.000606305	0.0333854	4.02557e-06	1.4395e-05	0.60301	4.50152e-05	0.361546	C1
TCGA-CC-5262-01	0.000955727	0.0357153	1.13698e-05	0.000156633	0.443357	1.04385e-05	0.469002	C1
TCGA-G3-AAV2-01	2.39533e-06	0.000604342	3.25045e-06	0.000726806	0.998625	2.42245e-06	1.92104e-06	C1
TCGA-UB-A7ME-01	0.00209939	0.0508612	5.54006e-05	5.69999e-06	0.7722	1.15035e-05	0.147312	C1
TCGA-DD-A11A-01	0.000167349	0.0396788	3.20374e-05	3.97979e-05	0.383383	1.04065e-06	0.574593	C1
TCGA-DD-AAEK-01	0.010482	0.0784067	0.00010669	5.15362e-05	0.476145	9.36702e-06	0.422984	C1
TCGA-EP-A2KB-01	2.49238e-06	0.0192516	2.9456e-05	2.15738e-06	0.163911	9.99601e-05	0.816642	C1
TCGA-G3-A5SM-01	2.09931e-05	0.0360222	0.000503393	1.5015e-05	0.779183	3.16476e-05	0.143244	C1
TCGA-DD-AAEB-01	0.00013049	6.68898e-07	0.000247093	6.31245e-06	0.999298	1.76634e-06	2.57579e-07	C1
TCGA-BC-A5W4-01	0.000134157	0.0132371	3.49005e-05	1.87148e-05	0.392929	4.18231e-06	0.592316	C1
TCGA-BD-A3ER-01	1.57482e-05	0.0467032	1.20989e-05	0.00199279	0.536652	3.25948e-06	0.374316	C1
TCGA-ZP-A9CV-01	0.000200594	0.0323196	0.00160876	1.39956e-07	0.213078	0.000683046	0.738272	C1
TCGA-DD-AADY-01	3.49647e-05	0.0169305	0.000227954	6.017e-05	0.375319	4.50062e-07	0.60046	C1
TCGA-G3-A3CI-01	4.70165e-05	0.0294639	7.30834e-06	4.47701e-06	0.216906	3.72003e-06	0.75269	C1
TCGA-FV-A496-01	0.000329066	0.000414013	0.000563448	0.000395598	0.997318	0.000361126	0.000215709	C1
TCGA-XR-A8TE-01	6.14887e-05	0.0374374	9.06156e-08	0.000484336	0.100305	7.63041e-07	0.848493	C1
TCGA-DD-A3A4-01	0.039789	0.0431928	0.654451	0.000392151	0.209756	0.0494449	3.00425e-08	C1
TCGA-RC-A6M4-01	3.70391e-06	3.1521e-06	8.69566e-08	0.00482776	0.992128	0.00138114	2.8755e-08	C1
TCGA-ED-A7PY-01	0.000600464	2.14685e-06	8.32787e-07	1.41416e-06	0.998468	0.000864992	7.12541e-08	C1
TCGA-DD-A113-01	0.000145	0.0284117	0.000158396	1.83832e-05	0.48414	0.000774871	0.481132	C1
TCGA-KR-A7K0-01	0.00235307	0.0267155	0.000627161	2.93663e-06	0.503693	0.000447953	0.454835	C1
TCGA-DD-A4NL-01	3.94789e-08	0.0175129	3.49947e-05	2.88279e-05	0.263729	3.27662e-05	0.711573	C1
TCGA-DD-A39Z-01	0.00543269	5.76526e-05	3.66371e-07	0.000522335	0.990924	1.90215e-05	8.27108e-07	C1
TCGA-DD-AADG-01	0.0691454	0.198959	0.000287858	0.0309735	0.700143	0.000193474	8.85163e-05	C1
TCGA-DD-AAW1-01	5.89666e-06	0.10965	0.00347699	6.01643e-05	0.772768	7.89892e-05	0.11162	C1
TCGA-DD-AAC9-01	7.65352e-06	0.0410163	2.62527e-05	2.85871e-05	0.896486	5.03896e-05	0.0416246	C1
TCGA-G3-A25Z-01	4.00883e-05	0.0180369	1.2937e-05	0.00557063	0.485901	4.87504e-06	0.48941	C1
TCGA-DD-A4NF-01	1.8844e-06	0.00725522	0.00017352	4.19821e-05	0.28571	0.000158601	0.699759	C1
TCGA-G3-A25V-01	5.1024e-06	0.0279681	0.000172728	7.26604e-06	0.658959	1.46215e-06	0.294618	C1
TCGA-G3-AAV5-01	1.46414e-06	2.98258e-07	9.42182e-07	3.43454e-05	0.999811	0.000100476	2.33942e-05	C1
TCGA-BD-A2L6-01	0.0820129	0.0463964	3.97508e-06	0.0217148	0.824905	5.93926e-05	1.63459e-06	C1
TCGA-XR-A8TF-01	0.00163008	0.0347135	2.51152e-06	2.6773e-05	0.256574	2.97719e-06	0.70665	C1
TCGA-G3-A7M5-01	4.45182e-07	0.0205233	3.92692e-05	3.82472e-05	0.49894	0.000250114	0.480175	C1
TCGA-WX-AA46-01	0.000151042	2.5346e-05	3.27681e-08	0.00231023	0.995922	0.00118681	8.11759e-06	C1
TCGA-O8-A75V-01	4.52984e-05	3.45889e-05	9.93257e-07	2.65213e-05	0.999872	4.25306e-08	1.84429e-05	C1
TCGA-BC-A10S-01	6.09048e-06	8.08825e-06	4.74692e-05	1.26209e-06	0.999364	2.98725e-07	8.93461e-07	C1
TCGA-DD-A1ED-01	1.59045e-05	0.0212822	9.555e-06	0.00615674	0.245907	1.37163e-05	0.726602	C1
TCGA-CC-A9FS-01	2.7693e-06	0.0336612	8.84187e-06	5.23544e-05	0.495281	0.000128851	0.470708	C1
TCGA-T1-A6J8-01	9.26963e-06	0.0692096	0.00200723	0.000139793	0.924489	0.000112698	0.00203013	C1
TCGA-DD-A73G-01	0.0128108	0.00250798	0.0737637	0.467178	0.443367	0.000178205	4.91418e-05	C1
TCGA-KR-A7K7-01	0.00111109	0.00864948	7.97328e-06	2.58461e-06	0.229518	0.00139828	0.758412	C1
TCGA-XR-A8TC-01	8.48838e-07	0.0329751	0.00138564	2.04884e-06	0.286511	0.00039091	0.669137	C1
TCGA-ZS-A9CD-01	2.53389e-05	0.0382962	1.84941e-06	2.09683e-05	0.385255	0.000584729	0.56648	C1
TCGA-2Y-A9GV-01	2.15616e-06	0.0344202	0.000185843	0.00313251	0.245656	4.09954e-07	0.713242	C1
TCGA-BC-A10T-01	0.00150158	0.0519195	3.08764e-05	1.74498e-06	0.560041	0.00193663	0.348954	C1
TCGA-DD-AAEI-01	0.00019673	0.0334392	8.63912e-06	6.57791e-06	0.419379	0.000410445	0.546149	C1
TCGA-FV-A2QQ-01	2.32309e-05	0.00410086	4.58506e-05	2.90598e-05	0.988597	0.00081487	7.16131e-05	C1
TCGA-EP-A2KC-01	1.04003e-06	4.53761e-05	9.52445e-06	2.54518e-05	0.999779	4.04708e-05	8.37295e-07	C1
TCGA-DD-A3A3-01	3.90816e-05	2.34103e-07	7.21189e-06	2.74038e-06	0.999931	1.87135e-05	3.97363e-07	C1
TCGA-G3-AAV3-01	0.00308914	0.0293563	9.43794e-05	7.30745e-06	0.427318	0.00128321	0.52252	C1
TCGA-G3-A3CJ-01	0.0401812	0.0547807	0.0019804	0.0333576	0.868995	0.000254184	0.000179477	C1
TCGA-DD-A4NP-01	0.00165461	0.0457724	1.17351e-05	0.00095294	0.311447	1.25437e-06	0.636589	C1
TCGA-5R-AA1D-01	6.64648e-05	0.0243992	2.53209e-05	0.0825009	0.233647	0.000149266	0.53557	C1
TCGA-DD-AAW2-01	7.77139e-06	3.35337e-05	0.00111471	0.0086986	0.990139	1.23713e-06	2.96597e-06	C1
TCGA-2Y-A9GW-01	1.29037e-05	0.339661	0.155749	5.00242e-05	0.482553	2.08121e-07	1.67519e-06	C1
TCGA-DD-A116-01	0.000667302	6.28791e-07	7.42153e-05	0.00116853	0.997843	0.000227068	3.61149e-07	C1
TCGA-G3-AAUZ-01	0.000303826	4.53548e-05	0.00170003	0.000184829	0.997254	0.000327787	2.18921e-07	C1
TCGA-DD-AAD2-01	0.00071588	0.0232492	3.12648e-06	8.08737e-06	0.275432	0.000249898	0.628379	C1
TCGA-DD-AADR-01	0.0002193	0.0505187	0.000820497	0.0021317	0.588142	0.00251833	0.355635	C1
TCGA-DD-AAVU-01	1.69661e-06	0.00815053	0.00055403	6.93834e-05	0.405954	3.74167e-06	0.584968	C1
TCGA-DD-AADP-01	0.0063398	0.00449044	0.00129759	2.95637e-06	0.336104	0.00110658	0.638334	C1
TCGA-2Y-A9H4-01	2.79712e-06	0.0196226	0.000368752	4.82414e-06	0.568064	0.000796548	0.409434	C1
TCGA-EP-A26S-01	1.72968e-05	0.0431331	8.14328e-05	2.60627e-05	0.463062	0.000345402	0.492752	C1
TCGA-ED-A7XO-01	0.00130097	0.0131939	3.35889e-05	1.20854e-05	0.960563	0.000944799	6.54553e-06	C1
TCGA-DD-AAVP-01	6.32873e-06	0.0256549	4.11938e-05	2.26591e-06	0.465131	1.71548e-05	0.507635	C1
TCGA-MI-A75C-01	1.05394e-06	1.05138e-05	1.38912e-06	9.87944e-05	0.999575	6.38955e-05	0.000248788	C1
TCGA-DD-A39W-01	1.60608e-05	0.0623772	0.000144854	4.65139e-05	0.328509	8.50494e-07	0.607864	C1
TCGA-DD-AAVY-01	3.15028e-05	0.0129825	0.000124927	2.66789e-06	0.633164	0.00193444	0.351716	C1
TCGA-5C-AAPD-01	0.0191911	0.0194953	1.68696e-05	1.67851e-05	0.375797	0.000393041	0.570941	C1
TCGA-DD-AAEH-01	0.0805436	0.107938	0.000424501	3.65003e-05	0.80553	0.000270557	2.54466e-05	C1
TCGA-UB-AA0V-01	3.50502e-06	0.0721825	0.000137741	0.0001863	0.694608	7.90648e-06	0.210216	C1
TCGA-DD-A118-01	0.000182954	0.0212162	9.5966e-05	3.42793e-07	0.255077	5.69542e-07	0.704836	C2
TCGA-DD-A1EF-01	0.00159344	0.0452676	3.85626e-06	1.08462e-06	0.150606	1.62752e-05	0.794416	C2
TCGA-WJ-A86L-01	0.000149428	0.0916276	0.000143305	0.000554427	0.641441	1.31817e-06	0.266079	C2
TCGA-CC-5263-01	0.000480835	0.0261561	1.00057e-05	0.00350286	0.0352987	3.45979e-09	0.921528	C2
TCGA-DD-AAE6-01	0.000169767	0.0298885	2.54122e-05	5.57555e-06	0.503324	1.65135e-05	0.464654	C2
TCGA-DD-A1EL-01	5.74608e-06	0.0233205	2.82459e-06	0.000197615	0.283177	0.000458704	0.691717	C2
TCGA-G3-A7M6-01	0.00116976	0.0443129	0.00254495	0.0127554	0.119611	5.13265e-07	0.804991	C2
TCGA-DD-AACQ-01	5.8993e-07	1.953e-05	0.120569	0.00053222	0.87799	0.000879734	9.15773e-06	C2
TCGA-G3-A25T-01	9.54604e-05	0.0107887	3.77263e-06	0.00655015	0.0345197	0.0015582	0.923276	C2
TCGA-DD-AADB-01	0.00519975	0.0476773	5.57705e-05	1.09135e-06	0.318879	0.000282217	0.624109	C2
TCGA-UB-A7MA-01	0.0435173	0.185163	6.60615e-05	3.1572e-06	0.742005	3.24187e-08	2.70783e-05	C2
TCGA-DD-AAD0-01	0.00049523	1.42006e-06	6.35252e-05	3.32645e-07	0.999375	3.4532e-05	2.17413e-05	C2
TCGA-BC-4072-01	8.83623e-05	0.0532704	1.5292e-05	0.000242189	0.160803	0.000562584	0.756752	C2
TCGA-UB-A7MD-01	0.00284132	0.037263	8.41823e-05	0.00622677	0.247722	4.43301e-07	0.691388	C2
TCGA-DD-AACS-01	6.21496e-05	0.000985022	0.000274515	0.00151857	0.994848	1.21199e-05	0.00150594	C2
TCGA-DD-AAEE-01	1.63579e-05	0.00125309	0.00136168	4.95799e-06	0.991622	0.000611797	0.000946731	C2
TCGA-CC-A7IE-01	0.00185091	0.0217043	0.000590421	1.01526e-06	0.180995	0.00022866	0.790299	C2
TCGA-WX-AA44-01	8.16923e-05	4.94551e-06	1.50463e-05	5.13211e-05	0.999821	1.85153e-05	7.59259e-06	C2
TCGA-ED-A7XP-01	5.08879e-06	0.0281839	0.000118297	1.11744e-05	0.166079	1.21525e-05	0.793087	C2
TCGA-BW-A5NQ-01	0.0040555	0.0305851	0.000178815	0.000123444	0.104119	1.35622e-06	0.857522	C2
TCGA-FV-A3R3-01	6.30999e-06	0.0456945	0.000141441	0.0456991	0.142148	4.35947e-07	0.743573	C2
TCGA-DD-AACL-01	0.00127848	0.0277322	7.93069e-06	8.93877e-06	0.154596	2.40494e-05	0.81198	C2
TCGA-DD-A4NJ-01	4.93899e-05	0.0363777	3.86846e-05	1.78242e-06	0.284552	0.000680754	0.667827	C2
TCGA-CC-A5UE-01	1.12494e-05	0.0115965	0.00113604	6.34838e-06	0.198778	0.000187059	0.788285	C2
TCGA-CC-A9FW-01	0.00161942	0.0319815	3.29505e-05	1.34334e-08	0.101274	0.000131977	0.862995	C2
TCGA-DD-A4NQ-01	2.57761e-06	0.0155555	0.00310502	0.000234689	0.215859	0.00053624	0.757856	C2
TCGA-RC-A7SH-01	0.00168622	0.00528349	0.000488546	3.34753e-06	0.970549	6.95976e-05	0.00747882	C2
TCGA-G3-AAV1-01	0.0108795	0.115945	0.279352	1.59274e-05	0.578027	1.45493e-07	0.00903339	C2
TCGA-DD-AA3A-01	0.000950607	0.013332	0.00342907	0.0100265	0.00891048	3.83199e-08	0.957971	C2
TCGA-2Y-A9HA-01	1.41205e-06	0.0166338	1.07179e-05	0.00269519	0.514376	0.000380901	0.464092	C2
TCGA-MR-A8JO-01	7.77196e-05	0.0330568	4.35835e-06	0.127106	0.135076	0.000227464	0.642746	C2
TCGA-5R-AA1C-01	0.00769208	0.111097	0.00395352	0.00178482	0.832163	0.000774707	0.0423739	C2
TCGA-DD-A4NH-01	1.79024e-06	0.0177681	1.70885e-05	0.000823711	0.0717609	1.04409e-05	0.896401	C2
TCGA-BC-A10R-01	0.00146548	0.0661373	0.000375812	6.32062e-05	0.655754	1.57966e-06	0.217592	C2
TCGA-ED-A459-01	6.00611e-06	0.00826223	1.25259e-06	9.20899e-06	0.109203	0.000129783	0.87815	C2
TCGA-CC-A7IK-01	4.57003e-05	0.133029	8.95574e-05	8.38115e-06	0.640533	0.000363643	0.225207	C2
TCGA-FV-A4ZQ-01	0.00460235	0.0257712	0.00376739	1.46072e-06	0.163701	2.38937e-05	0.800938	C2
TCGA-G3-A25S-01	0.040593	0.116545	0.164397	0.384654	0.293807	1.67271e-07	2.49492e-07	C2
TCGA-FV-A23B-01	0.000590471	0.0334874	5.69495e-05	4.88173e-06	0.137799	1.23167e-06	0.826049	C2
TCGA-DD-AADD-01	5.15634e-05	0.0294609	0.00195566	3.71505e-06	0.124285	1.07624e-05	0.843646	C2
TCGA-RC-A6M3-01	0.000742958	0.0184065	0.00177484	0.0153139	0.0142681	0.00103883	0.944754	C2
TCGA-CC-5260-01	0.00086881	0.0255407	0.00217401	0.0206303	0.0199021	8.1842e-08	0.807979	C2
TCGA-G3-AAV7-01	0.000273964	0.0204912	0.000960897	0.00239365	0.0330811	2.89136e-08	0.923246	C2
TCGA-DD-A39Y-01	0.000330001	0.000290241	3.2854e-06	1.03569e-05	0.234503	0.00193785	0.760497	C2
TCGA-G3-A25Y-01	3.94301e-05	0.0249342	1.62829e-05	0.0046158	0.13905	9.40304e-07	0.807109	C2
TCGA-DD-A1EG-01	3.17911e-06	0.0132822	0.000109434	0.000692309	0.80084	1.66439e-05	0.163063	C2
TCGA-5C-A9VH-01	0.00487822	0.0584678	6.25475e-05	7.65262e-05	0.713875	0.000949442	0.16965	C2
TCGA-BC-A10Q-01	0.000609582	0.0162413	0.00761659	0.00969923	0.00618431	0.000789901	0.927997	C2
TCGA-CC-5258-01	3.28555e-05	0.0280664	9.3098e-06	2.49426e-05	0.0720733	1.23867e-08	0.89166	C2
TCGA-G3-A7M9-01	0.000627341	0.0111367	0.0208885	0.0069261	0.0337802	8.79181e-08	0.917399	C2
TCGA-DD-A4NB-01	4.43629e-06	0.0461981	0.000104674	0.00979819	0.210851	0.000231555	0.438105	C2
TCGA-ED-A66X-01	0.00170145	0.0344602	9.54126e-06	1.63028e-05	0.260748	2.21899e-06	0.586377	C2
TCGA-DD-A114-01	0.011938	0.0183002	0.0110757	0.0244502	0.042028	0.000297418	0.7772	C2
TCGA-XR-A8TG-01	0.00216448	0.0269611	9.90371e-05	9.32235e-06	0.413143	2.59981e-06	0.543647	C2
TCGA-CC-A3MA-01	0.000440116	0.0119546	1.67166e-05	0.0146723	0.0263036	2.80913e-08	0.895822	C2
TCGA-DD-AADC-01	0.00024843	0.0234198	9.27846e-05	3.04935e-06	0.0998491	6.71428e-06	0.871073	C2
TCGA-DD-AAD1-01	0.0185843	0.0944339	0.000398259	9.19839e-06	0.314935	3.46818e-06	0.519652	C2
TCGA-DD-AAVV-01	6.31122e-06	0.0259039	1.49659e-05	5.02824e-06	0.367315	0.000303879	0.584034	C2
TCGA-ED-A8O5-01	0.000261067	0.017796	1.13248e-05	1.92009e-06	0.162868	1.91703e-05	0.816701	C2
TCGA-ED-A97K-01	0.00131974	0.0978159	1.49504e-05	0.0130887	0.0639297	3.16428e-09	0.769991	C2
TCGA-2V-A95S-01	0.00257184	0.0286738	9.09103e-06	1.86661e-06	0.156472	0.00217165	0.807669	C2
TCGA-UB-A7MB-01	2.97953e-06	0.026867	2.95476e-05	3.24094e-06	0.253834	7.27644e-05	0.718822	C2
TCGA-CC-5264-01	0.00102909	0.0413005	0.00118306	1.72458e-07	0.0970723	1.92968e-06	0.850217	C2
TCGA-ED-A66Y-01	0.00609941	0.062235	0.000162734	2.47609e-06	0.666766	0.000167028	0.251722	C2
TCGA-BC-A8YO-01	0.000290284	0.062644	4.66977e-06	5.76849e-06	0.220993	0.000798741	0.712238	C2
TCGA-DD-A4NR-01	0.000778392	0.0311791	5.92715e-07	2.88093e-05	0.165874	1.04913e-05	0.763483	C2
TCGA-CC-A8HU-01	0.000162344	0.0242447	0.000228388	8.08175e-07	0.149044	9.03432e-05	0.815944	C2
TCGA-XR-A8TD-01	0.00300449	0.0401068	1.35271e-05	0.0130376	0.221736	0.00016414	0.688372	C2
TCGA-DD-A4ND-01	2.18392e-06	0.0423056	3.65176e-06	0.0164268	0.116195	7.16794e-05	0.762277	C2
TCGA-ZP-A9D2-01	0.00295856	0.0411141	0.000166345	0.00971689	0.0504883	1.68034e-07	0.865648	C2
TCGA-2Y-A9GX-01	9.37488e-06	0.111065	3.91096e-05	6.53111e-05	0.392471	4.67442e-06	0.387484	C2
TCGA-BC-A216-01	2.93911e-06	0.0357137	8.85054e-05	0.000303662	0.453707	5.50386e-05	0.50537	C2
TCGA-CC-A3MB-01	9.31783e-05	0.0192347	3.57195e-05	3.86547e-06	0.170831	3.28274e-08	0.801639	C2
TCGA-DD-A4NE-01	5.57659e-06	0.0174206	1.80669e-05	5.36057e-06	0.179478	0.000140305	0.786756	C2
TCGA-RC-A6M6-01	1.00229e-05	0.0150102	4.60607e-06	0.0011698	0.0397951	4.93735e-05	0.940884	C2
TCGA-CC-A5UD-01	0.000775873	0.0361342	0.0121049	0.0217944	0.0193945	1.28728e-10	0.902472	C2
TCGA-BC-A10U-01	0.000528592	0.0337106	4.83473e-05	7.86434e-06	0.521112	1.52555e-06	0.436876	C2
TCGA-BC-A10Y-01	1.96472e-05	0.0186082	5.17782e-09	0.00387164	0.123133	2.52081e-05	0.851781	C2
TCGA-CC-A3M9-01	7.6341e-05	1.59654e-05	0.0203869	0.0177015	0.153893	0.0012519	0.580218	C2
TCGA-BW-A5NP-01	2.99075e-06	0.0227139	0.000101075	1.16934e-06	0.148729	8.60504e-05	0.826623	C2
TCGA-G3-AAV4-01	0.00101731	0.0274749	0.000498807	6.95261e-05	0.252819	4.24932e-05	0.718077	C2
TCGA-BC-A10W-01	0.00190052	0.0331731	0.000234633	5.1198e-06	0.093212	1.59834e-05	0.862922	C2
TCGA-CC-A8HS-01	7.54685e-07	0.0371731	5.527e-05	0.00025264	0.130483	4.03298e-07	0.826619	C2
TCGA-DD-A1EE-01	0.00160826	0.0362294	7.07064e-05	0.00616473	0.257312	5.20465e-07	0.694274	C2
TCGA-FV-A3I1-01	0.00290267	0.0346496	1.43507e-05	4.42005e-06	0.339582	0.000140012	0.593115	C2
TCGA-G3-A5SJ-01	0.000251635	0.0415361	1.94826e-05	2.01037e-05	0.266039	0.00104358	0.68403	C2
TCGA-BC-A3KG-01	3.99765e-05	0.0206125	5.99056e-06	0.0016803	0.342606	7.17394e-06	0.631572	C2
TCGA-DD-AAVS-01	1.59337e-05	0.0565821	1.92738e-05	3.94606e-06	0.252742	0.000112505	0.684262	C2
TCGA-FV-A3I0-01	0.000871151	0.00879206	0.00364894	0.010592	0.00420027	0.000719963	0.939728	C2
TCGA-CC-A9FV-01	0.000304654	0.0953398	4.76999e-05	8.58368e-07	0.299098	0.000146389	0.54034	C2
TCGA-BC-A217-01	0.00128181	0.0232386	1.59241e-05	9.45271e-07	0.249246	0.000179692	0.725235	C2
TCGA-DD-AAD5-01	0.0187407	0.0238597	2.39548e-05	6.08571e-06	0.0747066	0.00123497	0.879334	C2
TCGA-2Y-A9H0-01	1.38992e-06	0.0144584	5.48812e-05	4.91786e-05	0.272667	0.000348982	0.710634	C2
TCGA-DD-A1EI-01	0.000371417	0.0509998	0.000213689	6.76192e-06	0.420853	0.000121129	0.499541	C2
TCGA-LG-A9QC-01	5.95064e-05	0.0202744	1.32492e-06	0.04462	0.317647	0.000452989	0.61412	C2
TCGA-GJ-A3OU-01	1.87605e-05	0.0640694	2.95177e-05	0.00814453	0.344853	1.44699e-05	0.540416	C2
TCGA-CC-A7IJ-01	0.000797203	0.0224253	0.033496	0.0210709	0.0686996	3.61728e-08	0.737469	C2
TCGA-DD-AACA-01	0.000259939	0.0521675	1.09109e-05	1.41728e-05	0.278744	3.8253e-05	0.66638	C2
TCGA-2Y-A9GS-01	0.000133922	0.0437215	2.5391e-05	5.42656e-07	0.252184	7.96454e-05	0.690531	C2
TCGA-DD-AACW-01	4.4454e-05	0.0797728	4.86832e-05	0.00110947	0.592355	0.0011656	0.325419	C2
TCGA-FV-A3R2-01	0.000882912	0.00935411	2.19598e-06	0.000736844	0.160831	3.87426e-07	0.826729	C2
TCGA-5C-A9VG-01	2.14469e-05	0.0232571	0.000105929	0.00280185	0.0692659	1.54778e-07	0.877757	C2
TCGA-ZP-A9CZ-01	0.000224248	0.0534606	2.1815e-06	3.4267e-05	0.787752	4.77466e-05	0.146317	C2
TCGA-DD-A1EJ-01	1.43666e-06	0.0298594	1.03645e-05	4.60775e-06	0.13315	6.68388e-05	0.835697	C2
TCGA-DD-AACU-01	5.71465e-05	0.0214335	7.90787e-06	2.3221e-05	0.318967	0.000151242	0.641706	C2
TCGA-2Y-A9H2-01	3.62245e-05	0.0323727	9.41215e-05	0.00378889	0.0540763	3.08765e-05	0.891187	C2
TCGA-CC-5261-01	0.0175718	0.0550244	0.000352105	0.025084	0.0781097	1.74937e-07	0.761108	C2
TCGA-EP-A3RK-01	0.00392263	0.0161808	4.19429e-07	4.31308e-06	0.199717	2.86829e-05	0.774077	C2
TCGA-BC-A112-01	0.00156799	0.0275431	0.000527158	0.0135368	0.0274857	1.4859e-07	0.898732	C2
TCGA-DD-AACX-01	8.46256e-05	6.79872e-05	0.000705555	0.000742734	0.997258	0.000123197	3.38475e-06	C2
TCGA-DD-A4NN-01	0.00115475	0.0244543	6.51409e-06	0.000101971	0.161141	1.39728e-06	0.796441	C2
TCGA-DD-AACZ-01	0.0031752	0.0260877	4.73988e-07	3.81001e-06	0.145047	0.00013662	0.822925	C2
TCGA-DD-AAE0-01	0.000119817	0.021337	1.19621e-05	1.40083e-06	0.0735372	8.31816e-06	0.885149	C2
TCGA-YA-A8S7-01	5.09678e-06	0.0253188	8.74002e-06	0.000353248	0.157441	7.26702e-05	0.790002	C2
TCGA-2Y-A9GY-01	0.0122244	0.0254577	4.14654e-05	4.90521e-07	0.0986133	0.000378501	0.861966	C2
TCGA-ED-A8O6-01	0.000118942	0.0206619	3.6414e-06	9.58183e-06	0.164075	0.000228285	0.805348	C2
TCGA-ZP-A9D4-01	4.21127e-05	0.037277	4.53364e-06	0.000136068	0.951481	2.7653e-05	0.00916561	C2
TCGA-DD-A1EH-01	0.00032136	0.0238107	3.98112e-05	0.0216207	0.0603175	3.30382e-07	0.87975	C2
TCGA-BC-A10Z-01	8.1061e-07	0.0225769	0.000122629	0.00505538	0.237532	0.000318873	0.734244	C2
TCGA-ED-A7PX-01	0.000253821	0.0187889	4.3895e-08	0.0163181	0.0508122	6.46265e-05	0.839458	C2
TCGA-CC-A8HV-01	7.29113e-06	0.0133057	6.45617e-06	4.52292e-06	0.131983	0.00036618	0.842084	C2
TCGA-GJ-A9DB-01	3.21403e-05	0.0416168	5.51099e-05	2.02501e-05	0.430106	0.00104768	0.509117	C2
TCGA-MI-A75I-01	0.00099386	0.00299926	9.98567e-06	0.00345055	0.401317	0.00248629	0.588743	C2
TCGA-CC-A5UC-01	8.77086e-05	0.0225951	2.14898e-05	2.72422e-05	0.17404	2.0858e-06	0.790354	C2
TCGA-DD-AACK-01	0.00384381	0.0550878	6.36961e-06	2.44007e-05	0.20787	0.000149841	0.730272	C2
TCGA-DD-AADL-01	2.89771e-05	0.0249179	3.83534e-06	1.71954e-05	0.356565	4.89707e-05	0.617118	C2
TCGA-UB-A7MC-01	0.000551193	0.0481758	8.90865e-07	0.000908653	0.226477	6.14288e-07	0.720125	C2
TCGA-ED-A82E-01	0.00112208	0.0171098	0.00538005	0.016363	0.0040531	8.50044e-09	0.917881	C2
TCGA-UB-AA0U-01	0.0018974	0.0361088	1.19827e-05	2.11365e-06	0.386096	8.75525e-05	0.52162	C2
TCGA-CC-A9FU-01	3.34937e-05	0.0304652	4.31625e-06	2.8193e-06	0.124118	3.54705e-06	0.844493	C2
TCGA-DD-AADW-01	0.00124876	0.0336915	5.27171e-06	0.00938459	0.085561	4.16328e-07	0.839914	C2
TCGA-DD-AACB-01	0.037788	0.223108	0.0253636	0.220777	0.412695	0.0734074	0.00280083	C2
TCGA-DD-AACP-01	0.000724973	0.342168	2.31273e-06	0.453463	0.179708	0.00829929	1.25454e-06	C2
TCGA-DD-A4NS-01	0.000108413	0.0578001	4.58996e-05	0.00524855	0.31213	7.73962e-07	0.492095	C2
TCGA-DD-AACH-01	4.5651e-05	0.0192135	3.42899e-06	0.00025398	0.123858	0.00297194	0.841771	C2
TCGA-DD-AACN-01	3.21284e-07	0.0349059	0.000291373	1.30362e-05	0.213429	0.00102592	0.73344	C2
TCGA-PD-A5DF-01	0.000668795	0.0414435	3.71174e-05	1.63348e-05	0.642014	4.38709e-05	0.241012	C2
TCGA-CC-A7IG-01	1.46356e-05	0.00403747	9.86977e-05	6.49529e-06	0.312152	0.00131052	0.67612	C2
TCGA-4R-AA8I-01	2.19798e-06	0.0128315	5.21086e-05	4.7824e-06	0.231528	0.000677555	0.751424	C2
TCGA-DD-A4NG-01	1.30888e-05	0.0285263	3.14281e-05	0.00675466	0.24979	2.48737e-06	0.711092	C2
TCGA-ED-A5KG-01	0.148715	0.151532	0.0256086	0.0257202	0.0524961	1.56649e-08	0.577034	C2
TCGA-CC-A1HT-01	0.0022484	0.0163998	0.013965	0.0130006	0.0508691	0.00751264	0.87778	C2
TCGA-DD-AAC8-01	0.000938555	0.0190165	6.82902e-06	6.1344e-07	0.1274	0.000390643	0.851822	C2
TCGA-BD-A3EP-01	0.0302986	0.0410953	0.000182881	3.10844e-05	0.267682	2.90508e-07	0.629545	C2
TCGA-QA-A7B7-01	2.38769e-05	0.0340182	3.98091e-06	1.73599e-05	0.212316	2.18573e-07	0.750738	C2
TCGA-DD-A1EA-01	0.00316272	0.0616733	3.77538e-06	0.000435459	0.257402	1.80636e-06	0.675948	C2
TCGA-CC-A3MC-01	1.72495e-05	0.00418899	1.28715e-06	2.1236e-07	0.326169	0.000153311	0.640939	C2
TCGA-FV-A2QR-01	0.459481	0.0144704	0.231441	0.0219809	0.272499	8.2333e-05	1.39018e-05	C2
TCGA-K7-AAU7-01	0.000929691	0.0299056	1.86373e-06	0.00496945	0.0648201	0.000147501	0.834807	C2
TCGA-G3-AAV6-01	4.87035e-05	0.0113612	0.00426416	8.14588e-07	0.0745726	4.09982e-07	0.90498	C2
TCGA-CC-A8HT-01	2.99281e-07	0.0167331	0.000164423	0.000163477	0.14068	0.00108624	0.838337	C2
TCGA-RG-A7D4-01	0.026514	0.0189769	0.00306636	1.07282e-06	0.0539329	5.01008e-07	0.895991	C2
TCGA-DD-AAE9-01	9.28872e-05	0.0103874	6.58429e-07	0.00035526	0.457037	0.00163087	0.529283	C2
TCGA-DD-A4NA-01	0.00363099	0.0166377	0.00630063	0.0119017	0.0121215	0.00260922	0.897337	C2
TCGA-DD-A1EC-01	0.00136744	0.0322231	0.0217503	0.0591923	0.0315445	0.00661601	0.841228	C2
TCGA-BC-4073-01	0.0033179	0.0450649	0.000444752	9.44577e-07	0.102196	1.48476e-06	0.83797	C2
TCGA-WQ-A9G7-01	2.24262e-05	0.0157812	5.37286e-06	3.72842e-06	0.148512	3.47232e-07	0.826288	C2
TCGA-CC-A7II-01	0.000148069	0.0150725	6.88703e-07	3.28453e-05	0.089816	3.12053e-05	0.871267	C2
TCGA-GJ-A6C0-01	6.67835e-05	0.0230279	2.01647e-06	1.2082e-06	0.243738	0.000125445	0.728437	C2
pvalue	0.0728718	0.00113724	0.553627	0.66866	5.5782e-26	0.003549	1.32399e-23	NA

## Sheet: Table S4_2
Table S4_2 Heatmap and the boxplots of checkpoint inhibitors between HCC subgroups.
Patients	CD274	CTLA4	HAVCR2	LAG3	PDCD1	PDCD1LC2	TIGIT	SIGLEC15	Groups
TCGA-G3-AAV0-01	0.609995	0.34475	0.889446	1.88127	1.1197	0.543051	0.492746	4.39021	C1
TCGA-DD-AAE3-01	0.965522	0.364224	2.1247	0.799079	0.219802	1.14642	0.210484	1.47968	C1
TCGA-DD-A11D-01	0.915711	0.209346	1.14954	0.590296	0.209899	0.87964	0.305132	0.0858906	C1
TCGA-G3-A6UC-01	1.21798	0.139393	1.0785	1.21014	0.0946679	0.510306	0.160521	1.80342	C1
TCGA-K7-A6G5-01	1.09175	1.01279	1.89524	2.00193	1.271	1.1175	0.718022	0.167381	C1
TCGA-DD-AAE4-01	1.36322	1.7079	2.64627	3.17272	1.8955	2.41428	1.35169	0.311338	C1
TCGA-MI-A75G-01	0.720432	0.264	0.995084	1.10382	0.323908	0.292784	0.210705	0.102924	C1
TCGA-DD-AADV-01	0.918744	0.309935	2.23664	1.50017	0.566245	1.38471	0.519786	0.69716	C1
TCGA-LG-A9QD-01	0.937285	0.41578	1.04239	1.27854	0.783641	0.697656	0.636411	0.277329	C1
TCGA-DD-AACD-01	0.360058	0.601215	2.35213	1.31	0.332542	0.711252	0.35745	0.296857	C1
TCGA-DD-AAE7-01	0.966356	1.01194	2.34171	2.29599	1.25715	0.769087	0.716636	0.437186	C1
TCGA-DD-AADJ-01	0.445622	0.698975	1.45259	1.19993	0.665438	0.469009	0.315079	0.755884	C1
TCGA-CC-5259-01	0.319004	0.827514	0.990413	1.90228	0.888154	0.412138	0.834434	0.148832	C1
TCGA-HP-A5MZ-01	1.15264	2.09299	3.35482	1.75111	1.81636	1.61959	1.52674	1.01571	C1
TCGA-DD-A39X-01	0.403015	0.472595	1.73472	0.923179	0.581762	0.409415	0.256848	0.20446	C1
TCGA-2Y-A9GU-01	0.409147	0.674165	1.7135	1.7758	1.02533	0.617265	0.734174	4.03118	C1
TCGA-G3-A7M8-01	1.58135	0.256611	2.39707	1.68066	0.441384	1.03352	0.293785	3.26344	C1
TCGA-DD-A3A5-01	1.03385	0	0.974012	1.64323	0.708416	0.753631	0.392533	0.134917	C1
TCGA-DD-AADM-01	0.742245	0.902351	1.87936	0.841029	0.652575	0.449103	0.422566	0.111051	C1
TCGA-DD-AADU-01	0.676567	1.11064	1.37649	1.38328	0.530632	0.315614	0.374866	0.164213	C1
TCGA-CC-A7IF-01	0.740092	0.0953971	1.56658	1.332	0.228214	0.41903	0.162164	1.53261	C1
TCGA-DD-AAVW-01	0.825691	1.89439	2.77836	1.29167	1.20379	1.79553	1.02988	2.68492	C1
TCGA-DD-A3A7-01	0.318043	0.599017	1.12983	1.35372	1.02311	0.220049	0.299034	0.119882	C1
TCGA-EP-A2KA-01	1.20397	3.14047	3.09481	3.34602	2.95858	1.49142	2.31879	0.209997	C1
TCGA-ED-A7PZ-01	0.48482	0.0725818	1.66495	0.733079	0.20818	0.187458	0.0633598	0.105684	C1
TCGA-G3-A25U-01	1.31229	0.0883757	1.30957	2.03966	0.251029	0.887075	0.299677	1.13166	C1
TCGA-2Y-A9GZ-01	1.05029	0.0964964	1.55916	1.76526	0.0967612	0.63976	0.352619	0.242953	C1
TCGA-DD-AADK-01	0.410616	1.2714	1.82253	1.22635	1.07499	0.851014	1.05262	0.361187	C1
TCGA-G3-A5SI-01	0.39923	0	0.903677	0.969331	0.101493	0.0910544	0.0537279	4.42132	C1
TCGA-DD-A4NI-01	1.38181	2.04912	2.38531	2.53079	2.73437	2.0768	2.22788	1.56509	C1
TCGA-DD-A73A-01	0.880097	1.03351	2.64421	1.79696	1.08933	0.928864	0.476544	0.375212	C1
TCGA-ZS-A9CG-01	1.34863	0.427065	1.80565	0.6972	0.569163	1.14035	0.351377	1.08161	C1
TCGA-FV-A4ZP-01	0.598017	1.64561	2.59047	4.43285	3.65411	1.13065	0.815729	0.0688358	C1
TCGA-DD-AACJ-01	0.571189	0.160476	1.43554	0.77178	0.282517	0.0741408	0.0952511	0.258725	C1
TCGA-DD-AAVZ-01	0.353943	0.480378	1.48626	1.16728	0.898791	0.629814	0.27802	2.24028	C1
TCGA-DD-AAVR-01	0.904682	1.9128	3.18038	2.02483	1.996	1.87646	1.32033	0.240065	C1
TCGA-RC-A7SB-01	1.41557	0.671236	1.71421	0.965496	0.518118	1.14206	0.507691	3.49592	C1
TCGA-3K-AAZ8-01	0.889203	1.29393	1.29849	1.12763	1.40922	0.689291	0.927306	0.470742	C1
TCGA-UB-A7MF-01	3.22175	2.72698	3.20789	5.53155	3.29697	2.63234	2.63617	3.09446	C1
TCGA-ZP-A9D1-01	0.97175	1.62176	1.94658	0.959201	0.924492	1.34551	0.795393	0.669882	C1
TCGA-ZP-A9D0-01	0.414321	0.504884	1.10408	2.15165	0.216132	0.684138	0.305193	4.55254	C1
TCGA-WQ-AB4B-01	0.716205	0.904564	2.24757	1.30396	0.321748	0.376035	0.382386	0.451001	C1
TCGA-NI-A4U2-01	0.859501	0.34776	1.65936	1.6136	0.264742	1.12641	0.274674	0.161365	C1
TCGA-RC-A7SK-01	0.28713	0.481536	0.703538	1.77886	0.315596	0.0388881	0.32723	2.50773	C1
TCGA-DD-AADS-01	0.718177	2.14717	2.4122	3.5642	1.99614	0.91891	1.36969	2.26184	C1
TCGA-DD-A73F-01	1.69031	1.77123	3.20114	3.46282	3.4399	2.51957	2.4637	2.61338	C1
TCGA-DD-A11C-01	1.31855	0.610145	2.27914	1.25962	0.565515	1.58244	0.576632	0.225502	C1
TCGA-DD-AACO-01	0.132269	0.723504	2.09295	2.20599	0.505696	0.624834	0.236439	0.496817	C1
TCGA-DD-AAED-01	0.435412	1.30032	3.30542	2.34852	1.80483	0.608355	0.38459	1.60402	C1
TCGA-BC-A10X-01	1.56581	0.367769	2.81028	1.80084	0.768659	1.98178	0.881401	0.542228	C1
TCGA-DD-AAD3-01	0.853634	0.91781	2.45797	1.15948	1.17682	1.14367	0.64676	0.590617	C1
TCGA-K7-A5RG-01	3.48668	4.67961	4.664	5.84089	5.54852	4.0737	4.41769	2.12977	C1
TCGA-DD-AACF-01	1.56572	0.404791	2.58223	1.54602	0.772892	1.41299	0.616286	2.24189	C1
TCGA-DD-A3A2-01	0.951312	0.0844783	1.43147	1.74102	0.203124	0.744776	0.359919	0.512365	C1
TCGA-DD-A115-01	1.23907	0.309939	1.92782	2.79855	1.00101	1.40437	0.516991	0.160499	C1
TCGA-DD-AADO-01	0.837481	2.89554	2.75351	4.03822	2.62471	1.4686	2.14181	0.227001	C1
TCGA-BC-A110-01	2.85601	1.3779	3.61141	1.96776	1.35238	2.19634	0.503225	0.305124	C1
TCGA-DD-AAW3-01	1.15352	0.0710577	1.21563	0.985977	0.26606	0.24004	0.144611	0.874151	C1
TCGA-2Y-A9H7-01	0.319798	0.444291	1.44101	1.12711	0.567764	0.404123	0.170597	5.7616	C1
TCGA-RC-A6M5-01	0.690832	0.850145	2.66034	0.913228	0.783824	1.27157	0.265806	0.0689132	C1
TCGA-BC-A69H-01	0.585817	1.62285	2.96349	2.16414	2.30714	0.864197	0.848888	0.297197	C1
TCGA-BC-A69I-01	1.0162	0.242337	1.51189	1.54816	0.48277	0.751175	0.252155	0.854626	C1
TCGA-ED-A627-01	2.12205	2.68871	3.81706	3.1201	3.70173	2.23463	2.3278	0.430861	C1
TCGA-DD-AACC-01	2.22629	3.54772	4.53608	5.37598	4.97763	2.75262	3.57744	0.514235	C1
TCGA-DD-A3A9-01	0.454651	0.554004	1.6664	2.29196	1.19109	0.417623	0.761477	0.26578	C1
TCGA-ES-A2HT-01	0.564296	0.345429	1.15554	0.851441	0.55098	0.60374	0.257063	0.140741	C1
TCGA-2Y-A9H3-01	1.18791	2.33826	2.90178	3.47275	2.3045	1.48501	1.91818	2.30021	C1
TCGA-2Y-A9HB-01	2.11931	2.02145	2.53751	2.42774	2.96471	1.64133	1.58231	0.156698	C1
TCGA-DD-A3A6-01	1.45093	1.51434	2.51239	2.02386	1.10611	1.97542	1.69885	0.303841	C1
TCGA-BW-A5NO-01	1.10108	1.38337	2.44678	1.69245	1.001	1.48037	0.960589	0.887411	C1
TCGA-CC-A7IL-01	0.431489	0.0974539	0.755365	1.87435	0.159375	0.196821	0.155113	2.27595	C1
TCGA-DD-AACV-01	1.0192	0.0652567	1.12843	1.94741	0.18803	1.13937	0.215428	1.45674	C1
TCGA-KR-A7K2-01	0.626067	0.853758	1.40216	1.93516	0.611579	0.758833	0.357215	1.83358	C1
TCGA-DD-AAEG-01	0.583266	0.0361962	0.993604	0.578698	0.140013	0.60769	0.24574	0.344215	C1
TCGA-DD-AACG-01	0.347562	0.918963	2.54032	1.13099	0.761095	0.846777	0.510818	0.513646	C1
TCGA-CC-A123-01	0.226717	0.823259	1.4969	1.19927	0	0.167563	0.363923	0.0905325	C1
TCGA-DD-AAVQ-01	1.48436	3.00879	3.36902	3.80952	3.6167	1.98315	2.68553	1.34685	C1
TCGA-RC-A7S9-01	1.20062	1.32743	1.89536	3.95779	1.92623	0.802601	1.02382	1.88675	C1
TCGA-DD-A4NK-01	1.03954	0.0536374	1.48251	1.60862	0.20407	1.19552	0.14466	0.739465	C1
TCGA-DD-AADI-01	1.10525	1.29393	2.54482	2.3161	1.64654	1.44053	1.25871	0.644673	C1
TCGA-DD-AACY-01	0.507286	0.15917	1.52867	1.06516	0.664371	0.422042	0.30269	0.350401	C1
TCGA-DD-AAW0-01	1.40188	0.923023	3.61006	1.49673	1.48401	1.11326	1.17524	3.23998	C1
TCGA-5R-AAAM-01	1.55884	0.709068	3.16507	1.4102	1.27672	2.28763	0.527925	1.0552	C1
TCGA-ZS-A9CF-01	1.75139	1.60965	1.96891	1.24338	0.787607	0.842688	0.901614	0.361157	C1
TCGA-DD-AACI-01	1.42157	2.9878	3.64405	4.78461	3.21557	1.84052	2.15457	0.0879292	C1
TCGA-EP-A3JL-01	1.12247	1.91124	2.96803	2.74076	2.40714	1.64408	1.55219	0.256448	C1
TCGA-ES-A2HS-01	0.167051	0.0339169	0.79006	1.43281	0	0.227235	0.0585208	1.87306	C1
TCGA-DD-A119-01	0.302975	0.251763	2.05237	0.688606	0.390342	0.329256	0.179793	0.521373	C1
TCGA-2Y-A9H1-01	0.5273	1.43828	1.25953	1.93877	1.40671	0.699984	1.12387	0.291484	C1
TCGA-G3-A5SK-01	1.15931	0.786018	2.58141	2.14299	0.725722	1.40906	1.25492	1.17567	C1
TCGA-DD-AAE1-01	0.577773	0.871789	1.18393	1.67256	0.414584	0.416602	0.604024	1.75347	C1
TCGA-DD-AADN-01	0.836104	2.45357	3.66147	5.69952	3.33794	1.52132	2.27147	0.10681	C1
TCGA-DD-A73C-01	1.00566	0.204862	2.08686	1.45199	0.716015	2.40452	0.878966	0.216387	C1
TCGA-FV-A495-01	0.720196	1.36481	2.56719	2.51492	1.90696	1.34652	1.03273	0.369864	C1
TCGA-DD-A1EK-01	1.84011	0.314877	3.68608	1.82294	0.362178	1.36003	0.436928	2.42205	C1
TCGA-DD-AAD6-01	0.458588	1.11113	1.952	0.967698	0.19589	0.257002	0.171445	0.513224	C1
TCGA-G3-A3CH-01	1.34775	0.632864	2.26807	2.02002	3.65492	1.4799	0.850036	2.74811	C1
TCGA-DD-AAEA-01	1.88058	2.4027	2.50354	3.96787	2.98298	1.11421	1.99453	2.57002	C1
TCGA-CC-A7IH-01	0.724081	0.042748	1.00406	1.15763	0.124961	0.811338	0.223396	1.96573	C1
TCGA-MI-A75H-01	1.21344	1.42857	2.03186	1.896	1.45032	1.0904	1.15561	3.72889	C1
TCGA-DD-AAD8-01	0.895562	0.760967	2.38751	2.47554	0.68142	1.29448	0.553279	0.437988	C1
TCGA-DD-A73D-01	0.615111	0.180065	0.845127	0.378193	0.0930952	0.37619	0.142877	4.14435	C1
TCGA-K7-A5RF-01	1.54118	0.809316	3.18603	3.71249	1.88209	2.28829	1.59032	1.40552	C1
TCGA-DD-AACT-01	0.645254	0.757245	2.25784	1.79661	1.41839	1.34873	1.07117	0.560224	C1
TCGA-DD-A73B-01	1.01201	0	1.25563	1.76203	0.114129	0.874962	0.0671139	3.50061	C1
TCGA-DD-A4NO-01	0.936397	0.594711	1.62789	0.999485	0.596094	0.916659	0.298415	0.455576	C1
TCGA-2Y-A9H8-01	0.963928	2.42622	2.67157	4.33071	2.60407	1.54428	1.98323	3.34588	C1
TCGA-DD-A3A8-01	0.663318	0.286805	0.809778	0.667661	0.171251	0.42005	0.177889	1.96588	C1
TCGA-RC-A7SF-01	0.755441	1.88947	1.39775	2.40097	1.24819	0.691294	1.2504	0.265478	C1
TCGA-HP-A5N0-01	0.913867	0.0458947	1.779	1.50523	0.405066	1.25749	0.502085	2.64096	C1
TCGA-DD-A73E-01	0.82578	0.0587739	0.701035	0.365636	0.115561	0.291175	0.0613152	0.689293	C1
TCGA-G3-A5SL-01	0.619261	0.535266	1.34106	0.553298	0.293067	0.911384	0.445258	0.674039	C1
TCGA-2Y-A9H6-01	0.648595	1.144	2.71324	1.78314	1.64735	1.32875	1.015	3.4654	C1
TCGA-WX-AA47-01	0.902271	0	1.22255	0.244211	0.0627282	0.308403	0.04383	0.108799	C1
TCGA-MR-A520-01	0.905033	0.131864	3.5835	0.827495	0.365065	0.778162	0.340839	2.07532	C1
TCGA-DD-A3A1-01	0.779001	0.620995	1.88681	1.02925	0.622426	0.752957	0.615538	0.070453	C1
TCGA-DD-AADF-01	0.730091	1.80219	1.54363	3.1092	2.73239	0.466144	1.13497	1.42105	C1
TCGA-G3-A7M7-01	0.219182	0.212837	1.36566	0.388217	0.213399	0.155746	0.235177	0.775558	C1
TCGA-DD-AADQ-01	1.01723	1.02437	1.36352	1.51664	1.12243	0.406736	1.01533	0.24018	C1
TCGA-DD-AAVX-01	1.93339	0.633536	1.89128	0.670043	0.538434	2.21395	0.793043	0.43766	C1
TCGA-MI-A75E-01	1.10186	0.484071	2.3624	1.07471	1.71575	1.03324	0.79366	0.26466	C1
TCGA-DD-A11B-01	0.824104	0.0820828	1.08791	2.26834	0.555512	1.42189	0.166409	1.48222	C1
TCGA-LG-A6GG-01	1.12125	0.393043	1.38865	0.396151	0.296779	0.268026	0.272722	3.4525	C1
TCGA-DD-A39V-01	0.636632	2.18004	2.75502	4.43161	3.36036	1.76341	1.83835	1.2147	C1
TCGA-ZP-A9CY-01	1.13938	0.0905079	2.693	2.11226	0.21701	1.36009	0.319482	2.06537	C1
TCGA-NI-A8LF-01	0.760387	0.392555	1.50963	0.91796	1.09016	1.12257	0.322318	0.52829	C1
TCGA-DD-AAE2-01	3.95827	1.5714	2.7195	2.88065	3.06837	2.0843	1.83745	2.62386	C1
TCGA-KR-A7K8-01	1.36775	3.49604	4.11928	4.70559	4.25831	1.94249	2.47409	0.306069	C1
TCGA-EP-A12J-01	1.66898	0.0997585	1.45188	0.863534	0.364224	2.2686	0.137077	0.325509	C1
TCGA-DD-A4NV-01	1.59065	0.541309	2.06065	1.65613	0.892272	1.01458	0.717009	1.525	C1
TCGA-BC-A3KF-01	1.05248	0.205842	1.34394	1.79166	0.547335	0.787966	0.349945	3.27807	C1
TCGA-G3-A3CK-01	1.04415	2.31544	2.7709	2.85289	3.05401	1.64854	2.24817	1.29746	C1
TCGA-ZS-A9CE-01	1.25291	0	0.379799	1.56771	0.1764	1.68207	0.0945197	4.4495	C1
TCGA-DD-AADA-01	0.542756	1.04836	1.41514	3.11507	1.28599	0.797979	1.25152	0.443238	C1
TCGA-G3-A25X-01	1.33117	2.98847	3.86471	3.99162	2.73263	1.72963	2.20979	2.68556	C1
TCGA-2Y-A9H5-01	0.552627	1.1714	2.04309	1.65432	2.31525	0.583926	0.932111	1.34327	C1
TCGA-G3-A3CG-01	1.01513	0.907004	1.45357	1.12949	0.425911	0.596097	0.588085	1.12977	C1
TCGA-ED-A4XI-01	1.11489	0.682138	2.75003	2.94669	0.896455	1.93491	0.915263	1.4949	C1
TCGA-2Y-A9GT-01	1.82542	2.92337	2.59818	4.10404	3.9519	2.18119	2.89754	0.702583	C1
TCGA-DD-A1EB-01	2.07902	0.788656	1.28535	1.82628	1.31743	2.97216	0.796244	0.233091	C1
TCGA-DD-AACE-01	0.816071	0.736051	1.26562	1.3318	0.817915	0.636022	0.532855	4.52823	C1
TCGA-2Y-A9H9-01	0.957573	0.925891	1.97196	1.33115	0.762261	1.5651	0.7253	1.51769	C1
TCGA-CC-5262-01	1.27146	1.13796	2.93359	1.78021	0.922473	1.34794	0.966201	0.305473	C1
TCGA-G3-AAV2-01	0.539333	0.170543	1.46769	0.476871	0.130112	0.744074	0.232291	1.94356	C1
TCGA-UB-A7ME-01	1.00953	2.40367	2.62624	3.10895	3.45014	1.71723	2.30855	3.56177	C1
TCGA-DD-A11A-01	0.663177	0	1.22482	0.881157	0.0776769	0.779868	0.157294	1.88025	C1
TCGA-DD-AAEK-01	1.42322	2.25106	3.30838	2.91102	3.47493	1.90796	2.31957	1.49028	C1
TCGA-EP-A2KB-01	0.540165	0.927518	1.59013	2.01332	0.87843	0.559054	0.560467	3.00232	C1
TCGA-G3-A5SM-01	1.35073	1.34174	3.23754	1.15671	1.21548	1.53541	1.21661	3.4557	C1
TCGA-DD-AAEB-01	0.679733	0.662758	0.963409	2.02875	0.344703	0.402353	0.47539	1.09521	C1
TCGA-BC-A5W4-01	0.672356	0	1.4452	1.10244	0.0510957	0.255019	0.0356587	2.8279	C1
TCGA-BD-A3ER-01	1.43709	1.23307	2.87983	1.17946	0.624616	1.02086	0.677517	0.563159	C1
TCGA-ZP-A9CV-01	1.86726	1.0189	2.41132	1.44289	1.11853	1.68742	0.735689	0.0875454	C1
TCGA-DD-AADY-01	1.47425	0.537982	1.09317	0.477054	0.294679	0.773122	0.160888	0.950108	C1
TCGA-G3-A3CI-01	0.924775	0.863319	3.37552	1.52139	1.0906	0.768717	1.0408	3.19939	C1
TCGA-FV-A496-01	0.389574	0.0734578	0.607867	1.70699	0.177548	0.275853	0.0890004	2.91463	C1
TCGA-XR-A8TE-01	1.94359	0.692869	1.61422	1.83432	0.806037	0.66149	0.0945877	0.0541354	C1
TCGA-DD-A3A4-01	0.482644	0	1.37052	0.702171	0	0.65085	0.0167106	0.109548	C1
TCGA-RC-A6M4-01	0.472231	0.240168	0.657026	1.02936	0.0729952	0.354273	0.025755	0.297128	C1
TCGA-ED-A7PY-01	0.425226	0.560172	0.925241	1.96212	0.514211	0.327891	0.157811	2.39975	C1
TCGA-DD-A113-01	1.03983	1.38566	2.45444	1.50437	1.47844	1.27753	1.49477	0.155069	C1
TCGA-KR-A7K0-01	0.89891	0.722181	2.47858	1.31869	0.565662	0.483844	0.477924	1.73859	C1
TCGA-DD-A4NL-01	0.795126	0.328505	1.68665	1.27449	0.631811	0.576463	0.466168	0.306573	C1
TCGA-DD-A39Z-01	0.471728	0.0950906	0.48408	0.792941	0.348576	0.0433966	0.14628	1.66349	C1
TCGA-DD-AADG-01	0.749615	0.0922253	0.684397	1.13136	0.338912	0.723271	0.229368	2.53212	C1
TCGA-DD-AAW1-01	1.03712	0.0805617	1.08421	0.79663	0.264926	0.926687	0.124261	1.10468	C1
TCGA-DD-AAC9-01	0.595443	1.16194	2.30702	1.11037	0.97221	0.829086	0.819317	0.306834	C1
TCGA-G3-A25Z-01	0.553477	0.860374	1.9695	0.557233	0.540371	1.01101	0.487599	0.678648	C1
TCGA-DD-A4NF-01	1.2611	0.142871	1.08518	0.419009	0.273566	1.14608	0.133064	3.10874	C1
TCGA-G3-A25V-01	1.54052	1.44692	2.59074	1.25557	1.26388	1.18728	0.987182	0.505658	C1
TCGA-G3-AAV5-01	0.639619	1.16711	1.39185	1.01945	0.75146	0.463846	0.560168	0.238813	C1
TCGA-BD-A2L6-01	0.653849	0.58597	1.31102	1.13349	0.587337	0.573567	0.487342	0.107039	C1
TCGA-XR-A8TF-01	1.18389	1.63327	1.56526	1.68374	1.85478	0.957685	0.671656	4.31467	C1
TCGA-G3-A7M5-01	0.804716	0.713753	1.26053	1.47306	1.00338	1.18412	0.541258	1.57728	C1
TCGA-WX-AA46-01	1.73481	0.322681	1.98602	1.66608	0.352193	1.54094	0.530997	0.760549	C1
TCGA-O8-A75V-01	0.646518	0.76494	2.52798	2.1572	1.47331	1.39497	0.938689	0.365611	C1
TCGA-BC-A10S-01	0.903389	0.597743	2.93256	1.55248	1.1383	1.74186	0.650811	0.348986	C1
TCGA-DD-A1ED-01	1.22678	0.779496	2.2192	1.33473	0.907468	1.49904	0.685171	0.244532	C1
TCGA-CC-A9FS-01	0.507752	0.781832	1.82824	1.52737	0.698652	0.976139	0.872427	0.585819	C1
TCGA-T1-A6J8-01	0.388745	0.321568	1.17145	0.845414	0.263416	0.533707	0.231199	1.98445	C1
TCGA-DD-A73G-01	0.357944	0.760844	2.20407	2.25343	0.741211	0.439076	0.371295	0.650725	C1
TCGA-KR-A7K7-01	1.00087	2.74806	2.69538	3.95122	3.51661	0.631513	1.79124	0.104613	C1
TCGA-XR-A8TC-01	0.697261	0.529707	1.23868	2.18941	0.466067	0.360708	0.107293	3.50147	C1
TCGA-ZS-A9CD-01	0.516967	0.732126	2.08348	0.825695	0.793061	0.584031	0.270078	0.293385	C1
TCGA-2Y-A9GV-01	1.26762	0.720048	2.98746	1.2504	1.07909	2.43105	0.62956	0.627423	C1
TCGA-BC-A10T-01	1.3536	0.252625	2.1889	1.86338	0.391618	1.61286	0.560308	0.259821	C1
TCGA-DD-AAEI-01	0.448213	0.372029	3.23425	1.65203	0.772321	0.753273	0.386439	2.11368	C1
TCGA-FV-A2QQ-01	0.49177	1.05355	2.4056	2.12662	1.90156	1.16762	0.791185	1.07928	C1
TCGA-EP-A2KC-01	0.989688	0.903652	1.86619	1.43047	0.695761	0.968532	0.545489	1.24717	C1
TCGA-DD-A3A3-01	0.252309	0.608456	1.37822	1.00446	0.319137	0.288426	0.188571	0	C1
TCGA-G3-AAV3-01	1.66466	2.42884	2.99066	3.96041	3.45819	1.66253	2.80746	2.9074	C1
TCGA-G3-A3CJ-01	0.406242	0.0373945	1.19397	1.05294	0.275801	0.410925	0.328727	0.245696	C1
TCGA-DD-A4NP-01	0.517518	0	1.09299	0.943186	0.105981	0.44118	0.21255	0.0785868	C1
TCGA-5R-AA1D-01	1.21232	1.37042	3.28854	1.33861	1.75084	2.20321	1.14491	0.348705	C1
TCGA-DD-AAW2-01	0.807676	0	1.13785	0.457956	0.216635	0.471136	0.224901	1.62961	C1
TCGA-2Y-A9GW-01	2.03664	1.70445	3.63998	1.1723	0.904066	2.3363	1.243	2.13729	C1
TCGA-DD-A116-01	0.324615	0.941388	2.12635	1.34275	0.807295	0.648197	0.433358	1.8854	C1
TCGA-G3-AAUZ-01	0.815274	1.32345	1.60921	2.43959	1.90189	1.10738	0.947545	0.124784	C1
TCGA-DD-AAD2-01	1.58942	1.48214	3.07657	1.73846	2.21453	2.07575	0.791491	0.498171	C1
TCGA-DD-AADR-01	0.481484	0.998555	1.81732	1.59633	0.387305	1.14031	0.654872	3.88053	C1
TCGA-DD-AAVU-01	0.298268	0	1.50353	0.318441	0.123348	0.309594	0.0867274	2.63853	C1
TCGA-DD-AADP-01	0.759488	0.895818	2.05191	1.08574	1.00087	1.0779	0.821195	3.98995	C1
TCGA-2Y-A9H4-01	1.11055	0.584191	1.92799	2.36615	0.701121	1.57356	0.534907	0.134937	C1
TCGA-EP-A26S-01	1.3889	0.181484	1.8539	1.33633	0.181968	0.678808	0.417843	0.361032	C1
TCGA-ED-A7XO-01	1.02247	0.871525	2.30769	2.76154	1.39291	1.27483	0.837931	3.44458	C1
TCGA-DD-AAVP-01	3.64527	0.543589	1.35727	1.59631	1.24895	2.70875	0.309062	0.933553	C1
TCGA-MI-A75C-01	0.839462	1.59917	1.60843	2.49892	1.72288	0.611048	0.934483	0.165205	C1
TCGA-DD-A39W-01	0.843846	0.587104	1.5096	0.982242	0.522558	1.32231	0.714526	1.27526	C1
TCGA-DD-AAVY-01	0.752777	0.0845228	1.16618	1.75951	0.627209	0.768183	0.371846	2.00787	C1
TCGA-5C-AAPD-01	2.26105	3.23589	4.05576	4.39747	3.37509	2.47871	2.16667	0.795654	C1
TCGA-DD-AAEH-01	1.48009	2.02374	2.59582	3.79067	3.46821	1.94368	3.10611	0.175113	C1
TCGA-UB-AA0V-01	1.9786	0.698296	2.36092	1.99642	0.935474	1.6733	0.874553	0.645579	C1
TCGA-DD-A118-01	0.559689	0.319865	2.23913	1.03588	0.67573	0.775684	0.271833	2.99835	C2
TCGA-DD-A1EF-01	0.950029	1.94317	2.6776	2.09243	1.92551	1.08964	2.39679	2.7934	C2
TCGA-WJ-A86L-01	1.5263	0.639039	2.28402	1.34847	0.558652	1.86849	0.591967	1.02546	C2
TCGA-CC-5263-01	2.45503	1.16991	3.71575	2.10269	1.26916	1.15868	1.14228	0.471621	C2
TCGA-DD-AAE6-01	0.312268	0.0443493	0.521001	3.76596	0	0.116301	0.0155911	3.13131	C2
TCGA-DD-A1EL-01	0.588469	0.951894	2.32975	0.818405	0.247821	0.802849	0.555591	0.166521	C2
TCGA-G3-A7M6-01	1.1603	1.40008	2.16072	1.85414	1.48965	1.02045	1.83485	1.05778	C2
TCGA-DD-AACQ-01	1.24974	0.0757967	1.09922	2.51004	0.721724	0.195428	0.104471	0.172662	C2
TCGA-G3-A25T-01	1.27509	0.482511	3.7179	1.44989	0.79884	0.543744	0.52051	1.73994	C2
TCGA-DD-AADB-01	1.58217	3.10391	3.15125	4.29988	4.47346	1.66552	3.14806	1.02995	C2
TCGA-UB-A7MA-01	0.71176	0.92511	1.85159	0.831404	1.11389	0.343205	0.81232	0.436236	C2
TCGA-DD-AAD0-01	1.03792	0.0997824	1.58279	2.60103	0.100056	0.329724	0.120666	4.89408	C2
TCGA-BC-4072-01	2.54011	3.84642	4.19778	4.48308	3.39955	2.41822	3.2291	4.47528	C2
TCGA-UB-A7MD-01	1.475	1.65056	3.16273	1.77175	1.43151	1.65394	1.03194	0.202295	C2
TCGA-DD-AACS-01	0.570894	0.143417	1.20826	1.20483	0.210665	0.507523	0.21872	0.244584	C2
TCGA-DD-AAEE-01	0.801374	0.477708	1.51206	0.945484	0.305896	0.768697	0.620472	0.281984	C2
TCGA-CC-A7IE-01	0.936723	3.46924	2.96491	3.80264	3.65775	1.1096	2.92399	0.283861	C2
TCGA-WX-AA44-01	1.0087	1.73224	2.99807	1.53483	2.55215	0.874002	0.570465	3.19851	C2
TCGA-ED-A7XP-01	1.05524	0.932259	2.46956	1.47779	0.9111	1.11569	1.15209	0.236814	C2
TCGA-BW-A5NQ-01	2.04769	3.19825	3.65872	4.29934	4.20387	2.14504	3.60484	0.511161	C2
TCGA-FV-A3R3-01	0.825468	0.70638	2.94627	1.70501	2.15949	1.68053	0.70034	2.43503	C2
TCGA-DD-AACL-01	1.32946	2.61935	4.25297	4.03127	3.21196	1.89817	1.84773	0.605519	C2
TCGA-DD-A4NJ-01	2.01873	2.23604	3.65179	1.33831	0.713383	1.80527	1.22157	2.68534	C2
TCGA-CC-A5UE-01	0.736424	0.9286	2.39058	0.852628	1.02533	0.548698	0.557448	4.00341	C2
TCGA-CC-A9FW-01	0.79153	2.0181	1.87639	2.30161	1.55547	0.500861	1.44643	0.23454	C2
TCGA-DD-A4NQ-01	1.66733	1.11416	3.83294	0.762584	0.717575	2.53311	0.679043	0.098948	C2
TCGA-RC-A7SH-01	0.369586	1.03177	1.44473	1.6385	3.37626	0.348337	0.570206	4.12837	C2
TCGA-G3-AAV1-01	0.760558	0.621082	2.08478	0.861131	0.139033	0.882847	0.446597	1.55666	C2
TCGA-DD-AA3A-01	0.588188	0.206651	2.46475	1.25633	3.75044	0.351746	0.459661	5.28059	C2
TCGA-2Y-A9HA-01	1.11656	0.716453	1.85174	0.836113	0.207632	1.65289	0.611908	2.52216	C2
TCGA-MR-A8JO-01	1.76323	2.88249	3.24628	3.28003	2.46263	2.31942	2.59861	0.757367	C2
TCGA-5R-AA1C-01	0.876197	0.968425	2.31566	1.2187	1.30803	1.47569	0.469066	3.95664	C2
TCGA-DD-A4NH-01	1.2348	1.59464	2.6674	1.56897	1.72695	1.2995	0.602267	0.565898	C2
TCGA-BC-A10R-01	0.562116	0.291375	1.96346	0.626116	0.506732	1.25052	0.196678	2.8899	C2
TCGA-ED-A459-01	0.581565	0.523348	2.76556	0.978731	0.76693	0.937069	0.0989942	0.0724918	C2
TCGA-CC-A7IK-01	0.892898	0.516507	1.17055	1.01714	0.127645	0.802581	0.598092	0.888725	C2
TCGA-FV-A4ZQ-01	2.43344	3.30728	3.99987	5.14098	5.40738	2.78805	3.6708	0.195533	C2
TCGA-G3-A25S-01	0.845145	1.42417	2.30474	2.49386	1.12556	1.04014	0.79284	0.11459	C2
TCGA-FV-A23B-01	1.16588	1.46324	2.11894	1.18352	1.43931	1.10277	1.3286	2.81758	C2
TCGA-DD-AADD-01	0.931521	1.21988	2.24123	2.51095	2.25826	1.15705	1.29142	2.485	C2
TCGA-RC-A6M3-01	5.09443	1.80336	2.56917	2.27473	1.60714	1.12312	0.80437	0.632502	C2
TCGA-CC-5260-01	1.7602	1.24132	5.01947	2.37762	1.75667	1.95271	1.34951	2.00196	C2
TCGA-G3-AAV7-01	1.36912	1.70246	4.13091	1.48274	1.24574	1.25792	1.23311	1.31084	C2
TCGA-DD-A39Y-01	0.363736	0.833523	1.86766	1.24522	0.868313	0.39354	0.449225	0.133573	C2
TCGA-G3-A25Y-01	0.843815	1.67966	3.42383	2.26703	2.53006	1.10227	1.39662	1.35029	C2
TCGA-DD-A1EG-01	1.62787	1.62901	3.32453	2.07593	1.64225	1.86505	1.6996	0.638717	C2
TCGA-5C-A9VH-01	0.613577	0.877265	1.51885	1.19728	1.79894	0.529367	0.440935	1.97682	C2
TCGA-BC-A10Q-01	1.11315	0.830767	4.20009	1.13357	0.764386	0.88355	0.823935	0.254801	C2
TCGA-CC-5258-01	1.10834	1.62713	2.62334	1.82746	3.64784	1.37953	1.47873	2.21203	C2
TCGA-G3-A7M9-01	0.792237	1.21753	2.89905	2.80477	2.22608	0.608813	1.36577	1.44649	C2
TCGA-DD-A4NB-01	1.50538	1.55764	3.66049	2.2265	2.14116	1.60063	0.839373	0.193026	C2
TCGA-ED-A66X-01	0.626098	1.11987	4.12494	1.0888	2.01689	1.41791	0.853001	0.8743	C2
TCGA-DD-A114-01	3.6291	3.08482	4.72016	3.83478	4.18236	3.18484	3.0274	1.95232	C2
TCGA-XR-A8TG-01	1.64333	0.876534	2.56309	0.79581	0.800414	0.682799	0.879161	2.34824	C2
TCGA-CC-A3MA-01	0.615459	0.330835	2.68197	2.16972	0.491772	0.841683	0.400959	0.832705	C2
TCGA-DD-AADC-01	1.00002	1.58022	2.54002	1.82507	1.30486	1.12014	0.988661	0.127734	C2
TCGA-DD-AAD1-01	1.77896	1.82955	3.03407	2.11437	5.79208	1.802	2.31767	1.66888	C2
TCGA-DD-AAVV-01	1.38546	2.54635	3.24449	1.98321	1.74052	1.961	1.97381	0.3598	C2
TCGA-ED-A8O5-01	0.879953	0.301723	0.830118	1.60278	3.31075	0.502876	0.337002	2.85183	C2
TCGA-ED-A97K-01	1.90974	1.98396	4.03152	1.93086	1.35506	1.45018	1.22165	3.20076	C2
TCGA-2V-A95S-01	3.19356	4.07218	4.51106	5.28562	4.87548	2.60801	3.93178	0.285085	C2
TCGA-UB-A7MB-01	0.709301	0.0882798	1.0877	0.924011	0.211887	0.510188	0.0771161	0.223191	C2
TCGA-CC-5264-01	0.767723	1.94195	2.74354	2.18978	1.28519	0.771071	1.48317	0.225124	C2
TCGA-ED-A66Y-01	0.219402	0.277608	0.930998	1.27673	6.70175	0.362109	0.151569	3.50273	C2
TCGA-BC-A8YO-01	2.76692	3.17506	4.15793	4.66972	3.99802	3.17045	3.11035	0.349126	C2
TCGA-DD-A4NR-01	2.82852	3.73838	4.97978	4.81979	4.84015	3.03646	3.47312	0.898652	C2
TCGA-CC-A8HU-01	0.463936	0.275001	2.02922	3.29833	0.507092	0.586862	0.242114	1.32505	C2
TCGA-XR-A8TD-01	1.88972	3.48417	4.56531	4.68462	4.27261	2.27476	2.60007	0.476727	C2
TCGA-DD-A4ND-01	2.22016	2.14347	3.72027	3.45477	3.24746	2.24752	2.39305	2.5571	C2
TCGA-ZP-A9D2-01	1.10537	1.25736	3.41903	1.70745	1.89692	1.37539	1.08785	3.14576	C2
TCGA-2Y-A9GX-01	1.92661	2.57096	4.27202	2.03236	2.23789	2.64826	2.15063	0.633667	C2
TCGA-BC-A216-01	1.5018	3.57247	3.61279	4.79309	4.79582	0.710546	3.48905	0.195984	C2
TCGA-CC-A3MB-01	0.44121	1.38818	1.95458	1.31968	1.22581	0.676613	0.934692	0.145214	C2
TCGA-DD-A4NE-01	1.24998	0	1.22148	1.64204	0.0982682	0.429254	0.228048	0.221147	C2
TCGA-RC-A6M6-01	0.221449	2.37273	2.23681	1.94809	5.24743	0.680367	1.50646	0.141851	C2
TCGA-CC-A5UD-01	0.764669	0.746072	1.99847	2.06044	1.28876	0.464056	0.654932	1.41734	C2
TCGA-BC-A10U-01	0.528809	0.528024	2.24869	0.885678	0.701065	0.481474	0.416616	0.280305	C2
TCGA-BC-A10Y-01	1.51937	1.14685	2.21502	2.27901	2.09241	1.67815	1.17565	0.981327	C2
TCGA-CC-A3M9-01	4.43322	3.25932	6.07738	6.84952	5.96521	5.35147	4.33747	1.70932	C2
TCGA-BW-A5NP-01	0.348684	0.38594	1.05117	1.0042	0.878811	0.432875	0.522773	0.62495	C2
TCGA-G3-AAV4-01	1.52827	0.0561535	1.81624	2.3434	0.354586	1.59835	0.23828	3.91217	C2
TCGA-BC-A10W-01	1.30056	2.00878	3.17093	1.41534	1.37726	1.37719	1.04409	0.172856	C2
TCGA-CC-A8HS-01	0.32214	1.08321	1.16798	1.76803	1.34101	0.416065	0.798947	1.48634	C2
TCGA-DD-A1EE-01	1.38567	0.464384	2.11675	5.56073	0.370641	0.977319	0.338375	0.616864	C2
TCGA-FV-A3I1-01	1.57389	2.29052	3.28216	1.77559	1.81569	1.42	1.85338	0.674394	C2
TCGA-G3-A5SJ-01	2.17007	3.32484	3.46909	3.21758	2.63217	1.87737	2.79861	0.50436	C2
TCGA-BC-A3KG-01	1.39524	1.31719	2.20759	1.44616	1.23227	0.704254	0.732716	0.208039	C2
TCGA-DD-AAVS-01	0.449279	0.669002	2.58441	1.85573	1.47246	0.535582	0.617196	2.90364	C2
TCGA-FV-A3I0-01	1.81291	1.75002	7.48504	1.63772	2.90006	0.567098	0.53479	2.8739	C2
TCGA-CC-A9FV-01	2.51694	1.84311	7.62367	3.10653	3.46523	3.52667	2.40691	0.721983	C2
TCGA-BC-A217-01	1.80601	1.70795	2.2033	2.12942	1.45766	1.76717	1.63118	1.4298	C2
TCGA-DD-AAD5-01	1.83031	0.380751	3.39369	2.14928	0.655779	0.879133	0.2372	1.06041	C2
TCGA-2Y-A9H0-01	1.50889	2.00209	2.82049	4.20414	3.33675	1.4025	2.20782	1.79887	C2
TCGA-DD-A1EI-01	0.793331	0.949702	2.62719	1.12385	1.6112	1.33562	0.749172	0.318436	C2
TCGA-LG-A9QC-01	2.70152	0.713713	1.36145	1.27547	0.597859	0.819633	0.391621	0.407982	C2
TCGA-GJ-A3OU-01	3.32628	3.32129	5.65929	1.89026	2.10278	3.85194	2.51186	3.12842	C2
TCGA-CC-A7IJ-01	5.09327	2.64361	5.34305	5.33411	3.86106	7.18205	3.31383	0.444143	C2
TCGA-DD-AACA-01	0.875758	0.417706	1.2905	1.36016	1.30421	0.820665	0.594559	0.404654	C2
TCGA-2Y-A9GS-01	1.23432	1.44034	3.12986	1.69509	0.557585	1.6502	0.89051	0.352993	C2
TCGA-DD-AACW-01	0.391457	0.400295	1.42392	2.94568	1.53031	0.738856	0.716392	2.99105	C2
TCGA-FV-A3R2-01	1.45015	0.622461	1.74641	1.05741	0.595478	1.03409	0.334338	0.0744784	C2
TCGA-5C-A9VG-01	0.771349	0.518578	2.07523	0.887662	0.784881	0.801702	0.202322	0.614437	C2
TCGA-ZP-A9CZ-01	1.5223	2.06889	3.08028	2.7842	2.25466	1.78527	1.92305	1.52753	C2
TCGA-DD-A1EJ-01	0.715082	0.670843	3.23299	1.34874	1.33559	0.816095	0.490806	0.274161	C2
TCGA-DD-AACU-01	0.955828	0.609048	2.37734	1.67186	1.17899	0.885583	0.697397	1.58561	C2
TCGA-2Y-A9H2-01	2.22287	1.77793	3.85686	2.47417	2.50893	1.61197	1.49382	1.28179	C2
TCGA-CC-5261-01	1.4997	1.38909	2.87115	1.84698	2.57838	1.66771	1.91261	2.38777	C2
TCGA-EP-A3RK-01	1.98771	2.786	3.91779	3.8495	3.95135	2.46855	2.87269	1.26966	C2
TCGA-BC-A112-01	1.04983	0.294248	3.52185	1.08734	0.462729	0.856972	0.365956	2.50227	C2
TCGA-DD-AACX-01	1.23135	0.412592	1.71177	1.33979	1.21913	0.374931	0.428353	0.176386	C2
TCGA-DD-A4NN-01	0.199838	0.299022	1.51659	1.96931	2.15849	0.301305	0.0286259	0.609611	C2
TCGA-DD-AACZ-01	1.93586	3.30845	4.82656	4.13117	2.92913	3.12402	3.13311	0.325028	C2
TCGA-DD-AAE0-01	0.452823	1.1828	2.01889	1.82101	1.61819	0.944938	0.804076	2.24551	C2
TCGA-YA-A8S7-01	1.37677	2.06874	6.18977	1.8718	1.98848	2.49647	1.1336	0.481663	C2
TCGA-2Y-A9GY-01	2.07818	3.76944	4.21328	5.41017	4.00324	2.67506	3.0743	0.187579	C2
TCGA-ED-A8O6-01	0.449031	1.87823	1.89756	1.97216	1.49573	0.441984	1.11572	0.903043	C2
TCGA-ZP-A9D4-01	1.26043	0.269511	1.67538	0.755911	0.893953	0.821443	0.192801	2.59037	C2
TCGA-DD-A1EH-01	0.924839	0.436845	1.94493	1.0924	0.905329	0.927705	0.666327	3.80396	C2
TCGA-BC-A10Z-01	0.75667	0.242944	1.70633	0.833143	0	0.410135	0.137913	2.54018	C2
TCGA-ED-A7PX-01	0.952863	0.602215	3.45424	1.37142	3.81056	1.30482	0.732164	3.31892	C2
TCGA-CC-A8HV-01	0.445643	1.48142	1.01474	2.93016	0.592576	0.50498	0.421176	0.243247	C2
TCGA-GJ-A9DB-01	0.958753	1.05352	3.41831	2.34454	0.84077	0.87626	0.816565	0.780945	C2
TCGA-MI-A75I-01	0.937734	0.713532	1.75812	0.991735	0.715129	0.935414	0.755584	0.723482	C2
TCGA-CC-A5UC-01	0.543617	1.57755	2.88772	1.66343	1.28674	0.716756	1.06183	0.864773	C2
TCGA-DD-AACK-01	1.1391	1.08703	1.86188	1.29667	0.805024	0.448157	0.607255	0.540985	C2
TCGA-DD-AADL-01	0.896233	0.130218	1.90205	1.124	0.324933	0.509309	0.3243	3.88056	C2
TCGA-UB-A7MC-01	1.62309	0.713909	1.35581	1.60397	0.41459	0.936602	0.125368	0.223623	C2
TCGA-ED-A82E-01	0.834792	1.25305	2.99918	1.20841	0.456512	0.998664	0.677129	2.05008	C2
TCGA-UB-AA0U-01	1.46825	1.1944	3.19624	1.59337	1.28677	2.01294	0.822768	3.09935	C2
TCGA-CC-A9FU-01	0.71614	1.2365	1.47194	2.38523	1.80659	0.430134	1.02205	0.238048	C2
TCGA-DD-AADW-01	0.808793	0.688679	2.16176	0.902307	0.839025	0.503704	0.591684	3.04935	C2
TCGA-DD-AACB-01	1.88512	2.04012	3.02727	4.59428	3.44535	2.43872	2.45515	0.862587	C2
TCGA-DD-AACP-01	0.44934	1.90988	1.16746	2.94893	1.13484	0.451512	0.999113	0.991413	C2
TCGA-DD-A4NS-01	1.91753	1.37863	3.15128	2.55319	2.80351	1.86421	2.1679	0.989672	C2
TCGA-DD-AACH-01	2.34624	1.15047	3.342	1.25798	0.600762	0.887914	0.755968	1.52044	C2
TCGA-DD-AACN-01	1.88579	1.75606	2.44138	1.83547	2.11192	1.12962	1.14239	0.475546	C2
TCGA-PD-A5DF-01	1.33434	2.10141	3.60389	0.946777	1.04672	1.05356	1.21695	0.788462	C2
TCGA-CC-A7IG-01	0.474985	0.918728	2.40623	1.34195	6.3124	0.496917	0.326048	3.08279	C2
TCGA-4R-AA8I-01	1.86877	1.12829	2.60107	1.62493	0.810039	0.994401	0.80159	1.17495	C2
TCGA-DD-A4NG-01	1.41091	1.79334	2.12512	1.13189	1.04259	1.64696	1.482	0.208753	C2
TCGA-ED-A5KG-01	3.62432	4.05482	4.5519	5.73022	5.38629	4.23703	5.29036	1.75645	C2
TCGA-CC-A1HT-01	3.01292	4.10838	5.48917	5.71177	3.80627	3.58198	3.58302	0.516158	C2
TCGA-DD-AAC8-01	0.501146	0.56841	2.22033	0.954543	0.367992	0.899738	0.523046	0.814538	C2
TCGA-BD-A3EP-01	1.14571	2.46567	3.15945	1.72732	2.3144	1.19463	2.09874	0.366567	C2
TCGA-QA-A7B7-01	1.65779	1.26324	1.96444	2.68248	1.12603	1.14485	0.884814	1.65848	C2
TCGA-DD-A1EA-01	1.92839	2.13539	2.56604	2.54847	2.22965	1.86348	1.91647	2.42235	C2
TCGA-CC-A3MC-01	1.09649	0.854205	2.15797	1.16994	0.726199	1.09884	0.572014	0.150344	C2
TCGA-FV-A2QR-01	1.00016	0.212714	2.5919	0.860399	0.173068	0.296139	0.235042	0.129094	C2
TCGA-K7-AAU7-01	1.94334	2.43352	3.46323	1.93316	1.69223	1.11823	1.85861	0.624391	C2
TCGA-G3-AAV6-01	0.214749	2.09753	1.5549	2.17341	0.391651	0.296431	0.678332	0.159132	C2
TCGA-CC-A8HT-01	1.59164	2.42638	3.08222	2.49091	1.36805	0.710197	1.3193	1.91222	C2
TCGA-RG-A7D4-01	1.4796	3.50633	3.53424	4.83446	4.35997	1.94801	3.11645	0.218322	C2
TCGA-DD-AAE9-01	0.321558	0.509277	1.16803	0.274731	0.382104	0.406286	0.418769	3.83348	C2
TCGA-DD-A4NA-01	2.55854	2.06915	4.20969	1.12833	1.3381	2.39632	1.39505	0.501916	C2
TCGA-DD-A1EC-01	4.36254	3.41654	4.7	5.6502	4.17543	3.56301	3.86314	2.74822	C2
TCGA-BC-4073-01	3.48633	3.19043	4.63845	4.13702	3.31567	3.48979	3.48657	0.513089	C2
TCGA-WQ-A9G7-01	0.25911	0.608045	1.87018	1.23597	7.06142	0.118272	0.241776	2.5572	C2
TCGA-CC-A7II-01	4.49779	0.331249	2.51067	1.99428	0.364678	0.646676	0.298159	0.139319	C2
TCGA-GJ-A6C0-01	3.46069	0.994099	3.56	2.10009	1.70734	4.21983	0.789756	1.07305	C2
Pvalue	2.07297e-05	6.62542e-08	4.63545e-11	0.00745022	1.27743e-08	0.049321	1.79388e-06	0.397719	NA

## Sheet: Table S4_3
Table S4_3 The scores of Tumor Immune Dysfunction and Exclusion (TIDE) algorithm between HCC subgroups.
Patients	No benefits	Responder	TIDE	IFNG	MSI Expr Sig	Merck18	CD274	CD8	CTL.flag	Dysfunction	Exclusion	MDSC	CAF	TAM M2
TCGA-DD-AACC-01	FALSE	FALSE	2.14	2.84	0.52	2.89	1.36	4.6	TRUE	2.14	-2.2	-0.15	-0.1	-0.08
TCGA-CC-A3MA-01	FALSE	FALSE	1.82	-0.42	0.01	-0.54	-1.51	-0.54	FALSE	-0.39	1.82	0.14	0.11	0.02
TCGA-CC-A7II-01	TRUE	FALSE	1.82	-1.39	0.03	-0.64	3.24	-0.5	FALSE	-0.31	1.82	0.18	0.03	0.05
TCGA-DD-AAVQ-01	FALSE	FALSE	1.78	1.99	0.12	1.8	0.3	2.5	TRUE	1.78	-0.94	-0.06	-0.08	-0.01
TCGA-G3-A7M9-01	TRUE	FALSE	1.77	-1.33	0.04	-1.05	-1.36	1.14	FALSE	-0.41	1.77	0.22	0.02	0.02
TCGA-K7-A5RF-01	FALSE	FALSE	1.76	0.84	0.86	1.01	0.59	1.26	TRUE	1.76	-1.18	-0.17	0.11	-0.11
TCGA-FV-A495-01	FALSE	FALSE	1.74	0.57	0.73	1.06	0	1.26	TRUE	1.74	0.62	0.03	0.04	0.02
TCGA-K7-A5RG-01	FALSE	FALSE	1.73	2.98	0.43	2.66	1.92	4	TRUE	1.73	-2.11	-0.11	-0.12	-0.08
TCGA-G3-AAV6-01	TRUE	FALSE	1.72	-1.47	0.19	-0.74	-0.8	2.18	FALSE	-0.42	1.72	0.16	-0.01	0.1
TCGA-2Y-A9H3-01	FALSE	FALSE	1.7	0.8	0.53	1.66	0.57	1.99	TRUE	1.7	-1.02	-0.1	-0.07	0.02
TCGA-DD-AADW-01	FALSE	FALSE	1.62	-0.77	0.05	-1.06	-1.09	-0.95	FALSE	-0.91	1.62	0.11	0.09	0.04
TCGA-2Y-A9GT-01	FALSE	FALSE	1.58	2.11	0.78	1.69	0.74	2.99	TRUE	1.58	-1.81	-0.15	-0.02	-0.09
TCGA-CC-A5UD-01	FALSE	FALSE	1.55	0.2	0.06	-0.15	-0.9	-0.59	FALSE	-0.56	1.55	0.15	0.03	0.04
TCGA-CC-A5UC-01	FALSE	FALSE	1.54	-0.24	0.25	-0.04	-0.58	-0.02	FALSE	-0.56	1.54	0.12	0.05	0.05
TCGA-ED-A5KG-01	FALSE	FALSE	1.54	2.9	0.03	2.59	1.5	3.75	TRUE	1.54	-1	-0.07	-0.03	-0.05
TCGA-ED-A627-01	FALSE	FALSE	1.53	1.4	0.32	1.27	0.49	2.73	TRUE	1.53	0.06	-0.1	0.23	-0.1
TCGA-BC-A10T-01	FALSE	FALSE	1.52	-0.31	0.61	-0.07	0.11	0.22	FALSE	-0.37	1.52	0.06	0.16	0.02
TCGA-BC-A110-01	FALSE	FALSE	1.51	0.73	0.66	0.83	1.99	0.97	TRUE	1.51	-0.13	-0.1	0.19	-0.09
TCGA-DD-A4NB-01	FALSE	FALSE	1.5	-0.45	0.16	0.2	-0.17	1.02	FALSE	0.34	1.5	-0.04	0.32	-0.03
TCGA-DD-AA3A-01	TRUE	FALSE	1.49	-1.05	0.04	-0.9	-1.29	-0.99	FALSE	-0.41	1.49	0.15	0.05	0.01
TCGA-DD-A4NR-01	FALSE	FALSE	1.48	2.21	0.27	2.04	1.27	2.88	TRUE	1.48	-1.42	-0.08	-0.05	-0.08
TCGA-DD-A1EI-01	FALSE	FALSE	1.47	-0.61	0.08	-0.26	-0.7	-0.56	FALSE	-0.09	1.47	0.04	0.2	-0.01
TCGA-KR-A7K8-01	FALSE	FALSE	1.45	1.93	0.69	1.85	0.19	3.23	TRUE	1.45	-0.77	-0.07	-0.01	-0.04
TCGA-MI-A75E-01	FALSE	FALSE	1.45	0.28	0.6	0.34	0.19	0.9	TRUE	1.45	0.05	-0.08	0.11	-0.01
TCGA-DD-A4NN-01	TRUE	FALSE	1.45	-1.37	0.02	-0.97	-1.07	-1.05	FALSE	-0.37	1.45	0.12	0.02	0.07
TCGA-G3-A7M6-01	FALSE	FALSE	1.44	-0.51	0	-0.58	-1.08	-0.37	FALSE	-0.01	1.44	0.13	0.07	0
TCGA-ED-A4XI-01	FALSE	FALSE	1.43	0.68	0.47	0.69	-0.2	1.04	TRUE	1.43	-0.52	-0.16	0.16	-0.06
TCGA-DD-AAC9-01	FALSE	FALSE	1.42	0.05	0.8	0.4	0.15	0.48	TRUE	1.42	-0.38	-0.12	0.09	-0.02
TCGA-DD-AADC-01	FALSE	FALSE	1.41	-0.12	0.12	-0.42	-0.56	-0.55	FALSE	-0.93	1.41	0.17	0	0.03
TCGA-DD-AADS-01	FALSE	FALSE	1.39	1.47	0.91	1.7	0.78	2.27	TRUE	1.39	-1.47	-0.08	-0.15	-0.01
TCGA-DD-AAE0-01	FALSE	FALSE	1.38	0.38	0.01	-0.01	-0.91	-0.02	FALSE	0.04	1.38	0.14	0.03	0.03
TCGA-ZP-A9D2-01	FALSE	FALSE	1.37	-0.29	0.01	-0.57	-1.07	-0.89	FALSE	-0.55	1.37	0.08	0.13	-0.02
TCGA-5C-AAPD-01	FALSE	FALSE	1.36	2.37	0.18	1.77	1.11	1.98	TRUE	1.36	-0.44	0	-0.03	-0.04
TCGA-5C-A9VG-01	TRUE	FALSE	1.35	-1.47	0.38	-0.84	-0.52	-0.81	FALSE	-0.72	1.35	0.09	0.07	0.04
TCGA-K7-AAU7-01	FALSE	FALSE	1.35	-0.46	0.02	-0.37	-0.12	-0.91	FALSE	0.2	1.35	0.1	0.16	-0.06
TCGA-DD-AACP-01	FALSE	FALSE	1.34	-0.46	0.07	-0.41	-0.8	1.56	FALSE	-0.16	1.34	0.18	-0.07	0.07
TCGA-DD-A73F-01	FALSE	FALSE	1.34	2.59	0.8	1.97	0.61	3.08	TRUE	1.34	-1.64	-0.09	-0.12	-0.04
TCGA-ED-A7PX-01	FALSE	FALSE	1.32	-0.87	0.02	-0.45	-0.86	-0.18	FALSE	0.07	1.32	0.07	0.15	-0.02
TCGA-ES-A2HT-01	FALSE	FALSE	1.28	0.26	0.9	0.5	0.53	0.24	TRUE	1.28	-0.59	-0.07	0.02	-0.03
TCGA-UB-A7MA-01	FALSE	FALSE	1.28	-0.95	0.02	-0.8	-1.02	-0.39	FALSE	-0.2	1.28	0.13	0.06	0
TCGA-BC-A10S-01	FALSE	FALSE	1.27	-0.31	0.67	0.51	0.03	0.52	TRUE	1.27	-0.4	-0.13	0.1	-0.02
TCGA-5R-AA1D-01	FALSE	FALSE	1.23	-0.85	0.25	-0.04	-0.29	0.13	FALSE	0.36	1.23	-0.04	0.26	-0.01
TCGA-G3-AAUZ-01	FALSE	FALSE	1.22	0.4	0.92	0.71	0.34	1.43	TRUE	1.22	-0.53	-0.02	-0.06	0
TCGA-RC-A6M6-01	FALSE	FALSE	1.21	-0.22	0.25	-0.1	-0.98	-0.16	FALSE	0.07	1.21	0.16	-0.03	0.03
TCGA-UB-A7ME-01	FALSE	FALSE	1.19	1.43	0.11	1.15	-0.25	1.86	TRUE	1.19	-0.33	-0.02	-0.03	0.01
TCGA-HP-A5MZ-01	FALSE	FALSE	1.18	0.94	0.32	0.61	-0.08	0.49	TRUE	1.18	-0.17	-0.14	0.17	-0.04
TCGA-2V-A95S-01	FALSE	FALSE	1.17	3.94	0.62	2.74	2.05	3.64	TRUE	1.17	-1.66	-0.02	-0.12	-0.11
TCGA-O8-A75V-01	FALSE	FALSE	1.16	0.2	0.4	0.88	-0.07	1.67	TRUE	1.16	-0.75	-0.09	0.01	-0.01
TCGA-EP-A3JL-01	FALSE	FALSE	1.15	1.47	0.37	1.18	0.22	1.16	TRUE	1.15	-0.5	-0.05	-0.01	-0.02
TCGA-G3-A25Y-01	FALSE	FALSE	1.15	0.49	0.06	0.1	-0.9	-0.11	FALSE	0.02	1.15	0.07	0.12	-0.02
TCGA-CC-A8HV-01	TRUE	FALSE	1.13	-2.08	0.02	-1.25	-1.03	-1.08	FALSE	-0.53	1.13	0.12	0.03	0.01
TCGA-FV-A4ZP-01	FALSE	FALSE	1.13	0.14	0.42	1.38	0.55	1.8	TRUE	1.13	-0.11	0.05	-0.1	0.02
TCGA-DD-AACI-01	FALSE	FALSE	1.13	1.4	0.49	1.95	0.83	3.25	TRUE	1.13	-1.19	-0.08	-0.06	-0.04
TCGA-DD-A3A6-01	FALSE	FALSE	1.12	-0.78	0.16	0.91	0.44	0.93	TRUE	1.12	1.03	-0.02	0.17	0.01
TCGA-CC-A8HS-01	FALSE	FALSE	1.11	-0.89	0.05	-1.06	-1.4	-0.97	FALSE	-0.8	1.11	0.13	-0.03	0.05
TCGA-ED-A66Y-01	TRUE	FALSE	1.09	-1.93	0.05	-1.27	-1.14	-1.18	FALSE	-0.52	1.09	0.1	0.02	0.04
TCGA-UB-A7MF-01	FALSE	FALSE	1.09	4.17	0.85	2.81	2.15	2.91	TRUE	1.09	-1.6	-0.03	-0.13	-0.09
TCGA-G3-A25T-01	FALSE	FALSE	1.09	-0.75	0.44	-0.26	-0.21	-0.41	FALSE	0.23	1.09	0.09	0.05	0.02
TCGA-ED-A82E-01	FALSE	FALSE	1.07	-0.32	0.05	-0.35	-0.97	-1.13	FALSE	-0.13	1.07	0.06	0.11	0
TCGA-DD-AAE7-01	FALSE	FALSE	1.06	0.39	0.76	0.59	0.32	1.21	TRUE	1.06	-0.63	-0.11	0.05	-0.02
TCGA-DD-AAVR-01	FALSE	FALSE	1.05	0.53	0.52	1.04	0.02	1.21	TRUE	1.05	-0.46	-0.12	0.08	-0.01
TCGA-RC-A6M5-01	TRUE	FALSE	1.04	-1.52	0.3	-0.52	-0.51	-0.48	FALSE	0.78	1.04	-0.03	0.24	-0.03
TCGA-G3-AAV0-01	FALSE	FALSE	1.04	-0.02	0.86	0.33	0.35	0.66	TRUE	1.04	-0.61	-0.04	-0.07	0.02
TCGA-BC-A112-01	FALSE	FALSE	1.04	-0.8	0.01	-0.77	-0.68	-1.28	FALSE	-0.2	1.04	0.08	0.08	0
TCGA-BC-A10R-01	FALSE	FALSE	1.04	-0.84	0.15	-0.84	-0.57	-0.81	FALSE	0.08	1.04	-0.02	0.18	0.01
TCGA-DD-AAEK-01	FALSE	FALSE	1.02	1.47	0.39	1.21	0.07	1.99	TRUE	1.02	-0.96	-0.14	0.03	-0.02
TCGA-DD-A4NE-01	TRUE	FALSE	1.01	-1.15	0.52	-1.16	-0.22	-1.53	FALSE	-0.99	1.01	0.08	0.06	0.02
TCGA-DD-A1EH-01	FALSE	FALSE	1.01	0.65	0.12	-0.31	-0.65	-0.34	FALSE	-0.79	1.01	0.04	0.07	0.04
TCGA-2Y-A9H1-01	FALSE	FALSE	1.01	0.59	0.93	1.18	0.49	1.55	TRUE	1.01	-1.14	-0.06	-0.13	0.02
TCGA-DD-A1EC-01	FALSE	FALSE	1	2.69	0.6	2.43	2.62	3.11	TRUE	1	-1.28	-0.07	-0.03	-0.1
TCGA-5C-A9VH-01	FALSE	FALSE	1	-0.74	0.08	-0.52	-0.79	-0.46	FALSE	0.07	1	0.05	0.11	0
TCGA-DD-AAVV-01	FALSE	FALSE	1	1.35	0.1	1.06	0.17	0.35	TRUE	1	-0.29	-0.06	0.1	-0.07
TCGA-CC-5260-01	FALSE	FALSE	1	-0.12	0.01	0.18	-0.45	0.45	FALSE	0.29	1	0.07	0.1	-0.01
TCGA-CC-A7IG-01	FALSE	FALSE	0.99	-0.97	0.17	-0.52	-0.52	-0.95	FALSE	0.22	0.99	0.11	0	0.03
TCGA-DD-AADV-01	FALSE	FALSE	0.98	0.03	0.45	-0.25	-0.5	-0.35	FALSE	-0.2	0.98	0.07	0.08	0
TCGA-DD-AAD1-01	FALSE	FALSE	0.98	0.29	0.05	0.63	-0.08	1.53	TRUE	0.98	0.59	-0.03	0.17	-0.03
TCGA-DD-AAE4-01	FALSE	FALSE	0.97	1.75	0.96	1.89	0.97	2.83	TRUE	0.97	-0.72	-0.04	-0.08	0.01
TCGA-XR-A8TD-01	FALSE	FALSE	0.97	2.77	0.56	1.93	0.52	2.99	TRUE	0.97	-0.45	-0.05	0.07	-0.08
TCGA-DD-A1ED-01	FALSE	FALSE	0.96	-0.19	0.77	0.38	0.35	0.97	TRUE	0.96	-1.11	-0.15	0.05	-0.06
TCGA-5R-AAAM-01	FALSE	FALSE	0.95	0.01	0.54	0.35	0.41	0.47	TRUE	0.95	0.13	-0.14	0.21	-0.03
TCGA-DD-AADN-01	FALSE	FALSE	0.95	1.73	0.88	2.68	0.79	4.02	TRUE	0.95	-1.23	0.01	-0.2	0
TCGA-2Y-A9HB-01	FALSE	FALSE	0.95	1.4	0.89	1.19	1.11	1.83	TRUE	0.95	-1.38	-0.12	-0.03	-0.05
TCGA-DD-AACH-01	FALSE	FALSE	0.94	-0.94	0.25	-0.71	0.57	-1.3	FALSE	-0.23	0.94	0.11	0.03	0
TCGA-EP-A3RK-01	FALSE	FALSE	0.94	1.38	0.42	1.72	0.69	2.4	TRUE	0.94	-0.55	-0.04	-0.06	0.02
TCGA-ED-A7XO-01	FALSE	FALSE	0.93	-0.23	0.72	0.37	-0.03	0.77	TRUE	0.93	0.23	0.02	0.05	-0.04
TCGA-DD-A3A9-01	FALSE	FALSE	0.93	-0.4	0.15	0.62	-0.32	0.99	TRUE	0.93	1.02	0.02	0.1	0.05
TCGA-BW-A5NP-01	FALSE	FALSE	0.92	-0.09	0.22	-0.6	-0.83	-0.17	FALSE	-1.48	0.92	0.11	-0.04	0.06
TCGA-FV-A3I0-01	FALSE	FALSE	0.92	-0.77	0.03	-0.27	0.28	-0.68	FALSE	0.25	0.92	0.08	0.09	-0.03
TCGA-UB-AA0U-01	FALSE	FALSE	0.92	0.34	0.22	0.04	-0.22	0.21	FALSE	0	0.92	0.01	0.15	-0.01
TCGA-DD-AAEH-01	FALSE	FALSE	0.92	1.88	0.76	1.6	0.58	3.36	TRUE	0.92	-1.16	-0.1	-0.09	0.02
TCGA-K7-A6G5-01	FALSE	FALSE	0.89	1.36	0.88	0.88	0.52	0.84	TRUE	0.89	-0.78	-0.08	0.03	-0.06
TCGA-DD-AACT-01	FALSE	FALSE	0.87	0.28	0.63	0.52	-0.25	1.04	TRUE	0.87	-0.64	-0.08	0.03	-0.04
TCGA-BC-A10Q-01	FALSE	FALSE	0.87	-0.94	0.26	-0.48	-0.66	-0.34	FALSE	-0.21	0.87	0.07	0.06	0
TCGA-G3-AAV3-01	FALSE	FALSE	0.86	2.18	0.63	1.73	0.59	3.13	TRUE	0.86	-0.53	-0.05	-0.02	0
TCGA-DD-AACN-01	FALSE	FALSE	0.84	0.34	0.07	0.09	0.32	0.44	FALSE	-0.16	0.84	0.01	0.15	-0.02
TCGA-CC-5261-01	FALSE	FALSE	0.82	-0.34	0.01	-0.01	-0.72	0.35	FALSE	0.36	0.82	0.02	0.1	0
TCGA-DD-AADI-01	FALSE	FALSE	0.82	1.96	0.26	1.34	0.09	2.07	TRUE	0.82	0.15	-0.02	0.02	0.03
TCGA-G3-A3CI-01	FALSE	FALSE	0.81	-0.32	0.87	0.09	0.09	0.48	TRUE	0.81	-1.15	-0.17	0.02	-0.01
TCGA-DD-A39Y-01	FALSE	FALSE	0.81	-1.21	0.9	-0.4	-0.31	-0.27	FALSE	-0.52	0.81	0.12	-0.06	0.05
TCGA-CC-A3M9-01	FALSE	FALSE	0.81	2.95	0.1	3.21	2.76	4.62	TRUE	0.81	0.79	0.06	0.1	-0.05
TCGA-DD-A114-01	FALSE	FALSE	0.8	2.44	0.04	1.6	1.52	2.32	TRUE	0.8	0.03	-0.01	0.08	-0.07
TCGA-DD-A1EL-01	FALSE	FALSE	0.79	-0.5	0.22	-0.42	-0.79	-0.54	FALSE	-0.98	0.79	0.1	-0.05	0.05
TCGA-DD-AACA-01	FALSE	FALSE	0.79	-0.25	0.62	-0.34	-0.51	0.12	FALSE	-0.71	0.79	0.09	0	0.03
TCGA-ED-A7PZ-01	FALSE	FALSE	0.79	-1.46	0.64	-0.95	-0.32	-0.48	FALSE	-0.29	0.79	0.11	-0.06	0.05
TCGA-CC-5262-01	FALSE	FALSE	0.77	0.5	0.43	0.66	0.21	1.35	TRUE	0.77	1.24	0.04	0.2	-0.06
TCGA-DD-AACD-01	FALSE	FALSE	0.77	0.98	0.79	0.77	0.02	0.4	TRUE	0.77	-0.39	-0.02	-0.04	0.01
TCGA-MR-A8JO-01	FALSE	FALSE	0.77	0.09	0.08	0.75	0	0.86	TRUE	0.77	0.8	-0.01	0.18	-0.03
TCGA-DD-A1EG-01	FALSE	FALSE	0.76	1.61	0.17	1.22	0.63	0.89	TRUE	0.76	-0.4	-0.06	0.06	-0.05
TCGA-DD-A4ND-01	FALSE	FALSE	0.76	0.94	0.09	0.73	0.41	1.41	TRUE	0.76	0.51	-0.04	0.2	-0.06
TCGA-G3-AAV7-01	FALSE	FALSE	0.75	-0.48	0.03	-0.68	-0.5	-1.12	FALSE	-0.59	0.75	0.09	0.05	-0.03
TCGA-ED-A66X-01	FALSE	FALSE	0.75	-0.55	0.03	-0.1	-0.99	-0.18	FALSE	0.4	0.75	-0.03	0.14	0.01
TCGA-CC-A9FV-01	FALSE	FALSE	0.75	-0.32	0.36	1.12	0.69	1.55	TRUE	0.75	0.65	-0.08	0.17	0.01
TCGA-CC-5258-01	FALSE	FALSE	0.75	0.55	0.14	0.09	-0.17	-0.1	FALSE	-0.62	0.75	0.07	0.01	0.03
TCGA-WQ-A9G7-01	FALSE	FALSE	0.75	-1.38	0.22	-1.03	-1.03	-0.76	FALSE	-0.01	0.75	0.11	-0.02	0.02
TCGA-DD-AAE2-01	FALSE	FALSE	0.74	1.79	0.84	1.23	2.79	1.83	TRUE	0.74	-1.12	-0.07	-0.02	-0.07
TCGA-CC-A3MC-01	FALSE	FALSE	0.73	-0.64	0.35	-0.41	-0.09	-0.95	FALSE	0.04	0.73	0.04	0.1	-0.03
TCGA-2Y-A9H8-01	FALSE	FALSE	0.73	1.01	0.52	1.12	-0.16	2	TRUE	0.73	-0.91	-0.03	-0.1	0
TCGA-BC-A3KG-01	FALSE	FALSE	0.72	-0.67	0.4	-0.77	-0.27	-0.6	FALSE	-1.34	0.72	0.12	-0.04	0.01
TCGA-DD-A4NS-01	FALSE	FALSE	0.72	0.34	0.1	0.39	-0.14	1.74	FALSE	1.22	0.72	-0.07	0.24	-0.04
TCGA-DD-AAD2-01	FALSE	FALSE	0.72	0.11	0.49	0.44	0.43	0.34	FALSE	1.13	0.72	-0.04	0.21	-0.03
TCGA-PD-A5DF-01	FALSE	FALSE	0.7	0.37	0.39	-0.1	-0.01	-0.7	FALSE	-0.04	0.7	-0.01	0.19	-0.06
TCGA-DD-AAEE-01	FALSE	FALSE	0.7	-0.47	0.74	-0.4	-0.19	-0.62	FALSE	-0.34	0.7	0.08	-0.04	0.06
TCGA-CC-A9FU-01	FALSE	FALSE	0.69	-0.06	0.08	-0.07	-0.52	0.19	FALSE	-0.58	0.69	0.14	-0.09	0.03
TCGA-DD-AADO-01	FALSE	FALSE	0.69	1.14	0.48	1.87	0.67	2.8	TRUE	0.69	-0.64	-0.01	-0.13	0.03
TCGA-CC-A3MB-01	FALSE	FALSE	0.69	-0.35	0.21	-0.28	-0.92	-0.05	FALSE	-1.03	0.69	0.12	-0.02	-0.01
TCGA-DD-AAVX-01	FALSE	FALSE	0.69	1.74	0.91	0.78	1.16	0.55	TRUE	0.69	-1.37	-0.09	-0.02	-0.09
TCGA-KR-A7K7-01	FALSE	FALSE	0.68	1.11	0.43	1.3	0.39	2.72	TRUE	0.68	-0.53	0.07	-0.17	0.01
TCGA-CC-A8HU-01	FALSE	FALSE	0.68	-1.61	0.23	-1.05	-0.92	-1.17	FALSE	-0.69	0.68	0.11	-0.05	0.02
TCGA-XR-A8TG-01	FALSE	FALSE	0.67	-0.38	0.53	-0.55	0.25	-1.09	FALSE	-0.4	0.67	0.07	0.13	-0.1
TCGA-ED-A8O5-01	FALSE	FALSE	0.67	-0.69	0.22	-0.54	-0.3	-0.11	FALSE	-0.54	0.67	0.06	-0.03	0.06
TCGA-BC-A69H-01	FALSE	FALSE	0.66	-0.03	0.23	0.53	0.05	0.29	FALSE	0.56	0.66	0.1	-0.07	0.05
TCGA-ED-A97K-01	FALSE	FALSE	0.66	-0.86	0.05	-0.45	-0.42	-0.23	FALSE	0.46	0.66	0.04	0.1	-0.05
TCGA-DD-AAD5-01	FALSE	FALSE	0.65	-1.26	0.16	-0.52	0.4	-0.79	FALSE	0.01	0.65	0.1	0	-0.01
TCGA-CC-A9FW-01	FALSE	FALSE	0.65	-0.02	0.35	-0.04	-0.46	0.62	FALSE	-0.33	0.65	0.08	-0.02	0.03
TCGA-DD-A39V-01	FALSE	FALSE	0.64	1.29	0.63	1.73	0.22	2.63	TRUE	0.64	-0.19	0	-0.06	0.03
TCGA-WX-AA44-01	FALSE	FALSE	0.64	-0.3	0.14	-0.48	-0.6	-0.7	FALSE	-0.3	0.64	0.06	0.04	-0.01
TCGA-DD-AADK-01	FALSE	FALSE	0.62	0.08	0.26	-0.01	-0.53	0.2	FALSE	0.95	0.62	0	0.06	0.03
TCGA-CC-A7IK-01	FALSE	FALSE	0.62	-0.27	0.33	-0.75	-0.36	-0.97	FALSE	-0.89	0.62	0.09	-0.04	0.03
TCGA-XR-A8TE-01	FALSE	FALSE	0.62	-0.02	0.38	-0.31	0.85	-0.63	FALSE	-0.11	0.62	0	0.1	0
TCGA-ZP-A9CV-01	FALSE	FALSE	0.61	0.88	0.73	0.66	0.7	0.59	TRUE	0.61	-1.2	-0.11	0.04	-0.1
TCGA-EP-A2KA-01	FALSE	FALSE	0.6	1.73	0.77	1.64	0.24	2.42	TRUE	0.6	-0.59	0.05	-0.1	-0.04
TCGA-G3-A7M5-01	FALSE	FALSE	0.6	-0.08	0.95	0.15	0.3	0.3	TRUE	0.6	-0.98	-0.04	-0.12	0.01
TCGA-GJ-A9DB-01	FALSE	FALSE	0.59	-0.29	0.5	-0.44	-0.6	-0.64	FALSE	0.33	0.59	-0.01	0.15	-0.04
TCGA-DD-AAEG-01	FALSE	FALSE	0.59	-0.73	0.68	-0.72	-0.53	-0.94	FALSE	-0.17	0.59	0.06	0.04	0
TCGA-DD-AACB-01	FALSE	FALSE	0.58	2.47	0.45	2.27	0.96	3.34	TRUE	0.58	-0.41	0.02	-0.1	0.01
TCGA-DD-AADA-01	FALSE	FALSE	0.57	-0.03	0.33	0.47	-0.26	1.16	TRUE	0.57	-0.67	-0.1	-0.02	0.02
TCGA-ED-A8O6-01	FALSE	FALSE	0.56	-0.71	0.08	-0.28	-0.79	0.01	FALSE	-0.14	0.56	0.07	-0.02	0.03
TCGA-FV-A2QQ-01	FALSE	FALSE	0.56	0.44	0.64	0.74	-0.35	1.06	TRUE	0.56	-0.57	-0.06	-0.03	0
TCGA-DD-A73E-01	FALSE	FALSE	0.56	-1.29	0.73	-1.08	-0.54	-1.17	FALSE	-0.61	0.56	0.04	0	0.05
TCGA-DD-A1EJ-01	FALSE	FALSE	0.56	-0.12	0.33	-0.45	-0.56	-0.27	FALSE	-0.89	0.56	0.07	-0.05	0.05
TCGA-DD-A4NI-01	FALSE	FALSE	0.55	1.41	0.77	0.84	0.33	1.83	TRUE	0.55	-1.48	-0.18	0	-0.04
TCGA-CC-5263-01	FALSE	FALSE	0.55	-0.17	0.09	-0.45	0.49	-0.68	FALSE	-0.43	0.55	0.09	0	-0.01
TCGA-DD-AACL-01	FALSE	FALSE	0.54	1.62	0.11	1.3	0.16	1.65	TRUE	0.54	-0.22	0.04	-0.06	-0.03
TCGA-G3-A25X-01	FALSE	FALSE	0.54	0.49	0.13	1.23	0.24	2.04	TRUE	0.54	1.07	0.08	0.06	0.01
TCGA-RC-A6M3-01	FALSE	FALSE	0.54	-0.5	0.67	-0.12	3.71	0.29	FALSE	-0.28	0.54	0.14	-0.03	-0.03
TCGA-DD-A116-01	FALSE	FALSE	0.52	-0.29	0.5	0	-0.5	0.07	FALSE	0.7	0.52	0.02	0.03	0.03
TCGA-BC-A10X-01	FALSE	FALSE	0.51	-0.12	0.78	0.4	0.51	0.72	TRUE	0.51	0.1	-0.1	0.2	-0.06
TCGA-BC-4073-01	FALSE	FALSE	0.5	2.19	0.31	1.7	1.89	2.19	TRUE	0.5	-0.54	-0.02	0.02	-0.08
TCGA-DD-AACO-01	FALSE	FALSE	0.49	-0.12	0.68	0.28	-0.32	0.71	TRUE	0.49	-0.26	-0.02	-0.07	0.04
TCGA-CC-5264-01	FALSE	FALSE	0.49	-0.84	0.16	-0.64	-0.87	-0.29	FALSE	-0.83	0.49	0.11	-0.03	-0.01
TCGA-DD-A11C-01	FALSE	FALSE	0.48	0.11	0.4	-0.02	0.13	-0.68	FALSE	0.04	0.48	0.03	0.05	0
TCGA-BC-4072-01	FALSE	FALSE	0.48	2.08	0.1	1.27	0.61	1.58	TRUE	0.48	-0.02	0.02	0.03	-0.05
TCGA-DD-A115-01	FALSE	FALSE	0.47	0.23	0.83	0.27	0.12	0.37	FALSE	0.77	0.47	0.03	0.06	-0.01
TCGA-RC-A7SK-01	FALSE	FALSE	0.47	-1.13	0.83	-0.49	-0.63	0.06	FALSE	-0.06	0.47	0.05	-0.04	0.05
TCGA-CC-5259-01	FALSE	FALSE	0.46	0.36	0.43	0.75	0.33	0.99	TRUE	0.46	-0.54	0.02	-0.09	-0.01
TCGA-CC-A7IJ-01	FALSE	FALSE	0.46	1.77	0.08	2.31	3.1	3.14	TRUE	0.46	1.57	0.09	0.17	-0.02
TCGA-2Y-A9H2-01	FALSE	FALSE	0.46	0.06	0.03	0.04	0.1	-0.01	FALSE	0.22	0.46	0.06	0.03	-0.03
TCGA-DD-AAD3-01	FALSE	FALSE	0.46	0.99	0.25	0.13	-0.25	0.41	FALSE	0.74	0.46	-0.07	0.2	-0.04
TCGA-FV-A2QR-01	FALSE	FALSE	0.45	0.55	0.44	-0.34	-0.15	-0.33	FALSE	-0.12	0.45	-0.02	0.1	0
TCGA-CC-A5UE-01	FALSE	FALSE	0.45	-0.68	0.68	-0.43	-0.59	-0.11	FALSE	-0.79	0.45	0.12	-0.12	0.05
TCGA-DD-AAVP-01	FALSE	FALSE	0.45	0.49	0.57	0.35	2.77	0.29	FALSE	0.18	0.45	0.03	-0.01	0.04
TCGA-UB-A7MB-01	FALSE	FALSE	0.45	-0.77	0.53	-1.06	-0.71	-1.19	FALSE	-0.95	0.45	0.09	-0.05	0.02
TCGA-DD-AADY-01	FALSE	FALSE	0.43	0.17	0.46	-0.39	0.27	-0.81	FALSE	-0.69	0.43	0.04	0	0.03
TCGA-DD-AADL-01	FALSE	FALSE	0.43	-0.54	0.67	-0.92	-0.61	-0.85	FALSE	-0.95	0.43	0.08	-0.04	0.02
TCGA-CC-A7IH-01	FALSE	FALSE	0.43	-1.12	0.69	-0.69	-0.5	-0.69	FALSE	-0.9	0.43	0.02	-0.01	0.05
TCGA-RC-A7SH-01	FALSE	FALSE	0.43	-1.57	0.07	-0.91	-0.97	-0.77	FALSE	-0.08	0.43	0.09	-0.03	0
TCGA-DD-A118-01	FALSE	FALSE	0.41	-0.86	0.28	-0.35	-0.59	-0.38	FALSE	-0.1	0.41	-0.01	0.05	0.03
TCGA-DD-AAEI-01	FALSE	FALSE	0.41	0.81	0.86	0.45	-0.02	0.52	TRUE	0.41	-1.33	-0.07	-0.12	0
TCGA-2Y-A9H5-01	FALSE	FALSE	0.4	-0.58	0.14	-0.47	-0.88	-0.18	FALSE	0.41	0.4	-0.01	0.09	-0.01
TCGA-BC-A10W-01	FALSE	FALSE	0.4	-0.38	0.15	-0.62	-0.42	0.02	FALSE	-1.01	0.4	0.06	0.01	-0.01
TCGA-CC-A7IF-01	FALSE	FALSE	0.39	-0.86	0.65	-0.73	-0.31	-0.97	FALSE	0.05	0.39	0.05	-0.04	0.05
TCGA-DD-A3A5-01	FALSE	FALSE	0.38	-0.81	0.94	0.18	0.33	0.83	TRUE	0.38	0.31	0.06	-0.01	0
TCGA-DD-AAVW-01	FALSE	FALSE	0.37	-0.31	0.09	-0.07	-0.72	-0.26	FALSE	0.41	0.37	-0.07	0.12	0.02
TCGA-NI-A8LF-01	FALSE	FALSE	0.37	-0.49	0.49	-0.44	-0.37	-0.38	FALSE	0.21	0.37	-0.02	0.09	0
TCGA-G3-A5SK-01	FALSE	FALSE	0.36	1.21	0.95	0.94	0.57	1.18	TRUE	0.36	-1.54	-0.14	-0.02	-0.07
TCGA-2Y-A9GY-01	FALSE	FALSE	0.35	1.72	0.23	2	0.78	2.98	TRUE	0.35	-0.53	0.05	-0.12	-0.02
TCGA-DD-A4NA-01	FALSE	FALSE	0.34	0.02	0.14	0.02	0.62	-1.21	FALSE	0.07	0.34	0.02	0.08	-0.05
TCGA-DD-AAC8-01	FALSE	FALSE	0.34	0.25	0.21	-0.19	-0.53	-0.63	FALSE	-0.4	0.34	0.02	-0.01	0.03
TCGA-DD-A39Z-01	FALSE	FALSE	0.33	-0.53	0.88	-0.23	0.08	0.15	FALSE	-0.13	0.33	0.08	-0.1	0.07
TCGA-MI-A75I-01	FALSE	FALSE	0.33	-0.09	0.71	-0.16	-0.12	0.15	FALSE	-0.45	0.33	0.05	-0.03	0.02
TCGA-DD-A4NV-01	FALSE	FALSE	0.32	-0.62	0.68	-0.34	0.18	-0.21	FALSE	0.45	0.32	-0.06	0.13	-0.02
TCGA-DD-AADG-01	FALSE	FALSE	0.32	-0.62	0.88	-0.5	-0.22	-0.3	FALSE	-0.4	0.32	0.03	-0.02	0.04
TCGA-MI-A75H-01	FALSE	FALSE	0.32	2.14	0.71	1.13	0.38	1.28	TRUE	0.32	-0.72	-0.06	-0.07	0.02
TCGA-2Y-A9GS-01	FALSE	FALSE	0.32	0.4	0.25	-0.12	-0.42	-0.8	FALSE	-0.03	0.32	0.03	0.01	0.01
TCGA-FV-A4ZQ-01	FALSE	FALSE	0.31	2.91	0.3	2.25	1.01	3.74	TRUE	0.31	-0.99	0.01	-0.14	-0.02
TCGA-CC-A1HT-01	FALSE	FALSE	0.3	3.07	0.02	2.15	1	2.11	TRUE	0.3	0.44	0.07	0.06	-0.07
TCGA-DD-A4NH-01	FALSE	FALSE	0.3	-1.03	0.05	-0.78	-0.5	-0.81	FALSE	-0.19	0.3	0.04	0.06	-0.06
TCGA-2Y-A9H4-01	FALSE	FALSE	0.3	0.37	0.82	0.42	0.29	0.27	TRUE	0.3	-0.33	0.02	-0.1	0.02
TCGA-DD-A119-01	FALSE	FALSE	0.29	-0.04	0.83	0.01	-0.12	0.13	FALSE	0.1	0.29	-0.03	0.05	0.03
TCGA-FV-A3R3-01	FALSE	FALSE	0.29	-0.43	0.15	0.24	-0.59	0.34	FALSE	0.74	0.29	-0.1	0.17	-0.01
TCGA-ZP-A9CZ-01	FALSE	FALSE	0.28	0.95	0.5	0.86	0.16	1.14	TRUE	0.28	-0.14	-0.01	-0.04	0.01
TCGA-RC-A7SB-01	FALSE	FALSE	0.28	0.52	0.8	-0.25	0.38	-0.31	FALSE	-0.1	0.28	0.02	-0.01	0.02
TCGA-DD-A4NO-01	FALSE	FALSE	0.27	-0.32	0.23	-0.22	-0.18	-0.5	FALSE	-0.15	0.27	-0.07	0.14	-0.02
TCGA-BD-A2L6-01	FALSE	FALSE	0.26	-0.2	0.84	0	-0.22	0.5	TRUE	0.26	-0.2	0.01	-0.07	0.03
TCGA-2Y-A9HA-01	FALSE	FALSE	0.26	0.13	0.42	-0.5	-0.27	-1.38	FALSE	-0.38	0.26	0.06	-0.03	0.01
TCGA-HP-A5N0-01	FALSE	FALSE	0.26	0.07	0.51	-0.03	-0.31	-0.69	FALSE	0.83	0.26	-0.09	0.12	0.02
TCGA-DD-AAEB-01	FALSE	FALSE	0.25	-0.7	0.82	-0.1	0.28	0.49	TRUE	0.25	-0.24	-0.03	-0.06	0.05
TCGA-YA-A8S7-01	FALSE	FALSE	0.25	-0.13	0.06	0.28	-0.33	0.24	FALSE	0.42	0.25	-0.02	0.12	-0.05
TCGA-LG-A9QC-01	FALSE	FALSE	0.25	-1.05	0.7	-0.46	1.46	-1.15	FALSE	-0.4	0.25	0.03	0.02	-0.01
TCGA-T1-A6J8-01	FALSE	FALSE	0.25	-0.48	0.36	-0.37	-0.39	-0.28	FALSE	0.48	0.25	-0.04	0.07	0.01
TCGA-G3-A5SL-01	FALSE	FALSE	0.24	0.15	0.78	-0.31	-0.26	-0.53	FALSE	-1.03	0.24	-0.02	0.02	0.04
TCGA-DD-A39X-01	FALSE	FALSE	0.23	-0.57	0.7	0.22	-0.17	0.08	FALSE	0.71	0.23	-0.01	0	0.05
TCGA-DD-AADP-01	FALSE	FALSE	0.22	0.37	0.59	-0.12	-0.35	-0.39	FALSE	-0.43	0.22	0.01	0.03	0
TCGA-CC-A8HT-01	FALSE	FALSE	0.21	0.48	0.19	-0.11	-0.1	-0.24	FALSE	-0.5	0.21	0.1	-0.09	-0.01
TCGA-RG-A7D4-01	FALSE	FALSE	0.21	1.98	0.26	1.78	0.36	3.25	TRUE	0.21	-0.93	0.04	-0.19	-0.01
TCGA-DD-AACV-01	FALSE	FALSE	0.2	-0.41	0.72	-0.75	-0.12	-0.97	FALSE	-0.95	0.2	0.1	-0.11	0.03
TCGA-EP-A26S-01	FALSE	FALSE	0.19	-0.8	0.81	-0.62	0.11	-0.82	FALSE	-0.66	0.19	-0.01	-0.01	0.04
TCGA-ES-A2HS-01	FALSE	FALSE	0.19	-1.26	0.77	-0.26	0.09	-0.11	FALSE	0.81	0.19	-0.02	-0.03	0.08
TCGA-DD-AACS-01	FALSE	FALSE	0.19	-0.59	0.53	-0.81	-0.71	-1.08	FALSE	-0.86	0.19	0.08	-0.06	0
TCGA-DD-AAVU-01	FALSE	FALSE	0.18	-0.69	0.88	-0.32	-0.05	-0.42	FALSE	-0.2	0.18	0.04	-0.11	0.09
TCGA-DD-AAW2-01	FALSE	FALSE	0.18	-0.15	0.73	-0.37	-0.16	-0.46	FALSE	-0.7	0.18	0.02	-0.03	0.04
TCGA-G3-A5SI-01	FALSE	FALSE	0.17	-1.16	0.85	-0.97	-0.3	-0.67	FALSE	-1.25	0.17	0.08	-0.08	0.02
TCGA-2Y-A9H0-01	FALSE	FALSE	0.17	0.87	0.6	1.19	0.35	2.62	TRUE	0.17	-0.48	0.05	-0.1	-0.04
TCGA-DD-A1EF-01	FALSE	FALSE	0.16	0.24	0.12	0.23	-0.39	1.02	FALSE	-0.3	0.16	0	-0.02	0.04
TCGA-DD-A4NF-01	FALSE	FALSE	0.15	-1.32	0.69	-0.97	0.03	-0.7	FALSE	-0.8	0.15	-0.01	0.01	0.03
TCGA-DD-AADM-01	FALSE	FALSE	0.15	-0.07	0.9	0.13	0.28	0.03	FALSE	0.25	0.15	0.02	-0.03	0.03
TCGA-CC-A123-01	FALSE	FALSE	0.15	-0.92	0.42	-0.03	0.12	0.12	FALSE	0.09	0.15	0.02	-0.07	0.06
TCGA-DD-A4NQ-01	FALSE	FALSE	0.13	-0.04	0.53	-0.37	0.45	-0.72	FALSE	-0.35	0.13	0.06	0.03	-0.06
TCGA-UB-AA0V-01	FALSE	FALSE	0.13	-0.1	0.64	0.07	0.69	0.34	FALSE	0.53	0.13	-0.1	0.15	-0.02
TCGA-RC-A6M4-01	FALSE	FALSE	0.12	-0.45	0.91	-0.6	-0.21	-0.82	FALSE	-0.54	0.12	0.05	-0.07	0.04
TCGA-DD-AADD-01	FALSE	FALSE	0.12	-0.1	0.2	0.07	-0.46	0.95	FALSE	-0.81	0.12	0.09	-0.12	0.04
TCGA-DD-A1EB-01	FALSE	FALSE	0.12	1.07	0.94	0.59	1.16	0.79	TRUE	0.12	-0.54	-0.06	0.01	-0.02
TCGA-QA-A7B7-01	FALSE	FALSE	0.12	-0.6	0.65	-0.42	0.24	-0.63	FALSE	-0.69	0.12	0.08	-0.1	0.02
TCGA-DD-A4NG-01	FALSE	FALSE	0.11	0.11	0.35	-0.11	-0.02	0.01	FALSE	-0.67	0.11	0.01	0	0
TCGA-DD-AAW3-01	FALSE	FALSE	0.11	-0.58	0.83	-0.55	0.12	-0.45	FALSE	-0.88	0.11	0.01	-0.04	0.04
TCGA-WX-AA47-01	FALSE	FALSE	0.1	-1.66	0.83	-1.06	0.34	-0.59	FALSE	-0.12	0.1	0.06	-0.02	-0.03
TCGA-DD-AAE9-01	FALSE	FALSE	0.1	0.34	0.62	-0.23	-0.49	-0.46	FALSE	-0.6	0.1	0.03	-0.07	0.05
TCGA-XR-A8TC-01	FALSE	FALSE	0.09	-0.93	0.23	-0.97	-0.59	-0.96	FALSE	-0.82	0.09	0.03	-0.02	0.01
TCGA-BC-A69I-01	FALSE	FALSE	0.09	-0.22	0.78	-0.02	0.36	0.55	FALSE	0.77	0.09	-0.04	0.09	-0.02
TCGA-DD-AAE6-01	FALSE	FALSE	0.09	-2.21	0.6	-1.15	-0.34	-0.87	FALSE	-0.26	0.09	0.09	-0.13	0.04
TCGA-KR-A7K0-01	FALSE	FALSE	0.09	-0.11	0.47	-0.29	-0.27	-0.3	FALSE	0.12	0.09	-0.04	0.11	-0.05
TCGA-DD-A3A8-01	FALSE	FALSE	0.08	-0.04	0.89	-0.5	-0.06	-0.51	FALSE	-0.15	0.08	0	-0.03	0.05
TCGA-BC-A5W4-01	FALSE	FALSE	0.08	0.25	0.91	-0.4	0.02	-0.76	FALSE	-0.12	0.08	0.05	-0.08	0.03
TCGA-G3-A5SJ-01	FALSE	FALSE	0.08	1.48	0.26	0.93	0.64	1.51	TRUE	0.08	0.07	0.06	-0.02	-0.04
TCGA-DD-A73G-01	FALSE	FALSE	0.07	-0.84	0.65	0.46	0.26	0.37	FALSE	1.08	0.07	0.01	-0.05	0.05
TCGA-G3-AAV1-01	FALSE	FALSE	0.07	-0.67	0.42	-0.7	-0.53	-1.35	FALSE	-0.81	0.07	0.01	-0.01	0.02
TCGA-DD-AAE3-01	FALSE	FALSE	0.06	-0.48	0.95	0.04	0.47	-0.21	FALSE	0.44	0.06	-0.06	0.03	0.04
TCGA-G3-AAV2-01	FALSE	FALSE	0.06	-0.57	0.74	-0.43	-0.29	-0.88	FALSE	0	0.06	-0.01	-0.03	0.05
TCGA-DD-A73C-01	FALSE	FALSE	0.06	-0.59	0.94	-0.02	-0.1	0.73	TRUE	0.06	-0.11	-0.08	0.04	0.03
TCGA-G3-AAV5-01	FALSE	FALSE	0.06	-0.89	0.93	-0.26	-0.06	0.15	FALSE	-0.58	0.06	0.05	-0.1	0.06
TCGA-DD-AACG-01	FALSE	FALSE	0.06	-0.15	0.58	0.25	-0.06	0.46	TRUE	0.06	-0.24	0.06	-0.15	0.05
TCGA-BC-A216-01	FALSE	FALSE	0.05	0.62	0.5	0.71	-0.17	2.94	TRUE	0.05	-0.33	0.08	-0.09	-0.04
TCGA-2Y-A9GX-01	FALSE	FALSE	0.05	0.85	0.15	0.77	0.22	1.39	FALSE	1.07	0.05	-0.12	0.23	-0.08
TCGA-BC-A10Y-01	FALSE	FALSE	0.05	1.09	0.81	0.69	0.25	0.62	TRUE	0.05	-0.38	0.06	-0.11	-0.02
TCGA-DD-AADF-01	FALSE	FALSE	0.05	0.83	0.97	0.84	0.25	2.04	TRUE	0.05	-0.53	0.06	-0.13	-0.01
TCGA-DD-A4NJ-01	FALSE	FALSE	0.03	-0.02	0.18	-0.25	0.17	-0.55	FALSE	-0.27	0.03	0	0.03	-0.02
TCGA-G3-AAV4-01	FALSE	FALSE	0.03	0.31	0.82	-0.03	0.37	-1.2	FALSE	-0.41	0.03	0.03	-0.04	0.02
TCGA-RC-A7S9-01	FALSE	FALSE	0	0.59	0.69	0.44	0.28	0.22	TRUE	0	-0.4	0.07	-0.14	0
TCGA-DD-AACU-01	FALSE	FALSE	0	0.32	0.36	0.05	-0.33	0.39	FALSE	0.46	0	-0.01	0.04	-0.02
TCGA-EP-A2KB-01	FALSE	TRUE	0	-0.05	0.64	0.05	-0.23	0.47	FALSE	-0.61	0	0.06	-0.08	0.02
TCGA-BD-A3ER-01	FALSE	TRUE	-0.01	-0.31	0.4	-0.14	0.39	-0.49	FALSE	0.75	-0.01	-0.11	0.2	-0.07
TCGA-EP-A2KC-01	FALSE	TRUE	-0.01	0.05	0.31	-0.23	-0.22	-0.23	FALSE	-0.44	-0.01	0	0.01	-0.02
TCGA-DD-A113-01	FALSE	TRUE	-0.02	0.32	0.25	0.15	-0.28	0.78	FALSE	-0.05	-0.02	0.01	-0.02	0.01
TCGA-CC-A7IE-01	FALSE	TRUE	-0.02	1.1	0.11	1.1	-0.18	1.95	TRUE	-0.02	0.17	0.08	-0.07	0
TCGA-DD-A1EA-01	FALSE	TRUE	-0.02	1.49	0.58	0.94	0.44	1.54	TRUE	-0.02	-1.24	-0.05	-0.1	-0.03
TCGA-DD-AADB-01	FALSE	TRUE	-0.02	1.75	0.06	1.35	0.16	2.53	TRUE	-0.02	-0.4	0.04	-0.08	-0.03
TCGA-ZS-A9CG-01	FALSE	TRUE	-0.02	0.42	0.8	-0.18	0.33	-0.3	FALSE	-0.31	-0.02	-0.03	0.03	0
TCGA-ED-A7XP-01	FALSE	TRUE	-0.03	-0.47	0.3	-0.06	-0.31	-0.09	FALSE	-0.21	-0.03	-0.02	0.07	-0.04
TCGA-BD-A3EP-01	FALSE	TRUE	-0.03	0.26	0.06	0.39	-0.26	0.77	FALSE	1.65	-0.03	-0.05	0.09	-0.04
TCGA-DD-AACW-01	FALSE	TRUE	-0.04	-0.38	0.32	-0.2	-0.68	-0.34	FALSE	-0.61	-0.04	0.04	-0.12	0.06
TCGA-FV-A3I1-01	FALSE	TRUE	-0.04	0.83	0.18	0.38	0.22	-0.36	FALSE	0.66	-0.04	-0.02	0.07	-0.04
TCGA-ZS-A9CD-01	FALSE	TRUE	-0.06	0.26	0.53	-0.01	-0.36	-0.01	FALSE	0.59	-0.06	-0.06	0.13	-0.07
TCGA-DD-A73B-01	FALSE	TRUE	-0.07	-1.19	0.82	-0.8	0	-0.81	FALSE	-1.26	-0.07	0.04	-0.08	0.02
TCGA-BC-A10U-01	FALSE	TRUE	-0.07	-1.1	0.37	-0.83	-0.79	-0.78	FALSE	-0.53	-0.07	0.01	-0.01	-0.02
TCGA-2Y-A9H7-01	FALSE	TRUE	-0.08	-0.22	0.61	-0.22	-0.51	-0.31	FALSE	-0.14	-0.08	0.02	-0.12	0.08
TCGA-DD-AAVZ-01	FALSE	TRUE	-0.08	-0.69	0.32	-0.49	-0.82	-0.67	FALSE	-0.62	-0.08	0	-0.04	0.03
TCGA-ED-A459-01	FALSE	TRUE	-0.09	-0.36	0.22	-0.36	-0.63	-0.94	FALSE	-0.01	-0.09	0.03	0.01	-0.06
TCGA-DD-AADQ-01	FALSE	TRUE	-0.09	0.87	0.9	0.69	0.64	0.91	TRUE	-0.09	-1.04	-0.03	-0.1	-0.03
TCGA-DD-AAD8-01	FALSE	TRUE	-0.09	-0.71	0.61	-0.39	-0.27	-0.09	FALSE	-0.29	-0.09	0.04	-0.03	-0.03
TCGA-DD-A3A7-01	FALSE	TRUE	-0.1	-0.85	0.64	0.11	0.06	0.22	FALSE	0.49	-0.1	0.06	-0.08	0.01
TCGA-CC-A9FS-01	FALSE	TRUE	-0.11	0.05	0.69	-0.29	-0.63	-0.15	FALSE	-0.34	-0.11	0.01	-0.06	0.03
TCGA-BC-A10Z-01	FALSE	TRUE	-0.12	-2	0.9	-1.45	-0.44	-1.25	FALSE	-1.07	-0.12	0.04	-0.08	0.01
TCGA-KR-A7K2-01	FALSE	TRUE	-0.14	-0.05	0.41	-0.02	-0.18	-0.56	FALSE	0.83	-0.14	0	-0.01	-0.01
TCGA-ZP-A9D1-01	FALSE	TRUE	-0.15	-0.09	0.38	-0.11	-0.4	0.09	FALSE	0.28	-0.15	-0.06	0.12	-0.07
TCGA-BC-A217-01	FALSE	TRUE	-0.15	0.95	0.7	0.58	0.38	0.18	FALSE	-0.08	-0.15	0.08	-0.11	-0.01
TCGA-DD-AAD6-01	FALSE	TRUE	-0.15	-1.57	0.58	-0.89	-0.42	-0.71	FALSE	-1.01	-0.15	0.08	-0.13	0.01
TCGA-DD-AACZ-01	FALSE	TRUE	-0.15	1.98	0.16	1.73	0.62	1.82	TRUE	-0.15	-1.28	-0.04	-0.13	-0.02
TCGA-MI-A75G-01	FALSE	TRUE	-0.15	-0.96	0.86	-0.69	0.04	-0.53	FALSE	-0.34	-0.15	0.01	-0.05	0.01
TCGA-MR-A520-01	FALSE	TRUE	-0.16	-0.59	0.97	-0.18	0.22	0.33	TRUE	-0.16	-0.81	-0.13	-0.01	0.03
TCGA-DD-A3A4-01	FALSE	TRUE	-0.17	-1.31	0.93	-0.81	-0.03	-0.75	FALSE	-0.57	-0.17	-0.01	0	-0.01
TCGA-2Y-A9H6-01	FALSE	TRUE	-0.17	-0.53	0.27	0.19	-0.64	0.25	FALSE	1.22	-0.17	-0.11	0.09	0.01
TCGA-G3-A7M7-01	FALSE	TRUE	-0.17	-0.9	0.86	-0.56	-0.38	-0.43	FALSE	0.14	-0.17	-0.04	0.01	0.01
TCGA-WQ-AB4B-01	FALSE	TRUE	-0.17	-0.27	0.52	0.05	0.16	-0.27	FALSE	0.53	-0.17	-0.04	0.05	-0.03
TCGA-WJ-A86L-01	FALSE	TRUE	-0.17	-0.31	0.59	-0.63	-0.02	-1.46	FALSE	-0.15	-0.17	0.03	-0.05	-0.01
TCGA-FV-A3R2-01	FALSE	TRUE	-0.17	-0.16	0.66	-0.4	0.16	-0.25	FALSE	-0.53	-0.17	0.02	-0.04	-0.01
TCGA-FV-A496-01	FALSE	TRUE	-0.18	-1.1	0.58	-0.84	-0.41	-0.81	FALSE	-0.36	-0.18	0	-0.03	0.01
TCGA-G3-A3CK-01	FALSE	TRUE	-0.19	1.27	0.89	0.92	0.03	2.05	TRUE	-0.19	-0.87	-0.07	-0.04	-0.01
TCGA-RC-A7SF-01	FALSE	TRUE	-0.19	0.1	0.67	0.07	0.01	0.44	FALSE	0.09	-0.19	0.01	-0.02	-0.02
TCGA-UB-A7MC-01	FALSE	TRUE	-0.19	-0.5	0.49	-0.89	0.3	-1.22	FALSE	-1.16	-0.19	0.06	-0.07	-0.03
TCGA-ED-A7PY-01	FALSE	TRUE	-0.19	0.09	0.38	-0.43	-0.51	-0.17	FALSE	-0.47	-0.19	0.01	-0.1	0.05
TCGA-BW-A5NQ-01	FALSE	TRUE	-0.2	2.54	0.64	1.7	0.63	3.04	TRUE	-0.2	-0.63	0.06	-0.14	-0.02
TCGA-DD-A4NP-01	FALSE	TRUE	-0.21	-1.08	0.94	-0.36	-0.12	-0.27	FALSE	0.23	-0.21	-0.06	0.01	0.03
TCGA-DD-A11B-01	FALSE	TRUE	-0.21	-0.12	0.62	-0.7	-0.35	-0.81	FALSE	-1.01	-0.21	-0.05	0	0.02
TCGA-BC-A3KF-01	FALSE	TRUE	-0.22	-0.28	0.46	-0.49	-0.12	-0.55	FALSE	-0.43	-0.22	0.01	-0.06	0.02
TCGA-G3-A25Z-01	FALSE	TRUE	-0.22	-0.72	0.85	-0.3	-0.16	-0.5	FALSE	-0.01	-0.22	-0.04	0.02	-0.02
TCGA-BC-A8YO-01	FALSE	TRUE	-0.23	2.54	0.33	1.51	0.89	2.52	TRUE	-0.23	-0.92	0.01	-0.1	-0.06
TCGA-DD-A1EE-01	FALSE	TRUE	-0.23	-0.69	0.51	-0.56	-0.12	-1.54	FALSE	-0.93	-0.23	0	-0.02	-0.02
TCGA-BW-A5NO-01	FALSE	TRUE	-0.24	0.2	0.71	0.27	0.02	0.05	FALSE	0.17	-0.24	0	-0.05	0.01
TCGA-DD-A39W-01	FALSE	TRUE	-0.24	1.36	0.78	0.27	-0.15	-0.54	FALSE	-0.2	-0.24	-0.02	-0.04	0.03
TCGA-DD-A3A3-01	FALSE	TRUE	-0.25	-0.66	0.91	-0.19	-0.01	0.05	FALSE	0.46	-0.25	0.01	-0.08	0.03
TCGA-DD-AAD0-01	FALSE	TRUE	-0.26	0.62	0.79	-0.44	0.1	-0.6	FALSE	-0.61	-0.26	0.05	-0.09	0
TCGA-NI-A4U2-01	FALSE	TRUE	-0.26	-0.33	0.94	-0.38	0.13	-0.8	FALSE	-0.12	-0.26	-0.07	0.02	0.02
TCGA-XR-A8TF-01	FALSE	TRUE	-0.27	-0.28	0.83	0.07	0.23	0.71	FALSE	-0.75	-0.27	0.04	-0.1	0.01
TCGA-GJ-A6C0-01	FALSE	TRUE	-0.27	0.76	0.63	0.71	2.1	-0.37	FALSE	0.48	-0.27	-0.01	0.05	-0.08
TCGA-4R-AA8I-01	FALSE	TRUE	-0.28	0.73	0.71	0.01	0.35	-0.9	FALSE	0.03	-0.28	0	-0.01	-0.04
TCGA-G3-A5SM-01	FALSE	TRUE	-0.3	0.59	0.42	0.59	0.33	-0.11	FALSE	1.07	-0.3	-0.09	0.13	-0.08
TCGA-G3-A3CH-01	FALSE	TRUE	-0.31	-0.06	0.53	0.05	0.04	0.47	FALSE	0.59	-0.31	-0.04	0.01	-0.01
TCGA-DD-AADJ-01	FALSE	TRUE	-0.32	0.69	0.82	0.18	0.02	0.02	FALSE	0.29	-0.32	0	-0.1	0.05
TCGA-DD-AACQ-01	FALSE	TRUE	-0.32	-0.05	0.77	-0.72	0.3	-0.42	FALSE	-0.24	-0.32	0.02	-0.1	0.02
TCGA-ZS-A9CE-01	FALSE	TRUE	-0.33	-0.85	0.93	-0.64	0.55	-0.77	FALSE	0.04	-0.33	0.01	-0.08	0.02
TCGA-DD-A11A-01	FALSE	TRUE	-0.35	-0.76	0.67	-0.61	-0.4	-0.85	FALSE	-0.82	-0.35	0.02	-0.06	-0.01
TCGA-FV-A23B-01	FALSE	TRUE	-0.35	0.98	0.23	0.32	-0.1	0.46	FALSE	-0.26	-0.35	0.02	-0.07	0
TCGA-G3-A25U-01	FALSE	TRUE	-0.37	-0.72	0.9	-0.66	0.23	-0.7	FALSE	-0.9	-0.37	0.03	-0.09	0.01
TCGA-DD-AAVS-01	FALSE	TRUE	-0.39	0.11	0.16	-0.26	-1	0.51	TRUE	-0.39	0.2	0.01	-0.03	0.04
TCGA-UB-A7MD-01	FALSE	TRUE	-0.39	0.38	0.38	0.3	0.17	-0.26	FALSE	0.81	-0.39	-0.04	0.07	-0.08
TCGA-LG-A6GG-01	FALSE	TRUE	-0.39	-0.87	0.85	-0.73	0.15	-0.98	FALSE	-0.45	-0.39	0.01	-0.04	-0.02
TCGA-G3-A3CG-01	FALSE	TRUE	-0.39	0.75	0.75	0.28	0.07	0.26	FALSE	0.19	-0.39	-0.04	0.08	-0.09
TCGA-G3-A25S-01	FALSE	TRUE	-0.4	-0.35	0.82	0.44	0.12	0.12	FALSE	-0.11	-0.4	0.04	-0.16	0.03
TCGA-ZP-A9D0-01	FALSE	TRUE	-0.4	-0.6	0.81	-0.44	-0.53	-0.7	FALSE	-0.43	-0.4	-0.07	0.01	0.01
TCGA-DD-AAW0-01	FALSE	TRUE	-0.43	0.2	0.35	0.08	0.04	0.46	FALSE	0.66	-0.43	-0.14	0.12	-0.03
TCGA-CC-A7IL-01	FALSE	TRUE	-0.44	-0.42	0.96	-0.37	-0.12	-0.32	FALSE	-0.64	-0.44	0.01	-0.12	0.04
TCGA-2Y-A9GZ-01	FALSE	TRUE	-0.44	-0.92	0.87	-0.67	-0.1	-0.82	FALSE	-0.16	-0.44	-0.01	-0.07	0.01
TCGA-2Y-A9GU-01	FALSE	TRUE	-0.45	-0.48	0.85	-0.22	-0.56	0.09	FALSE	-0.27	-0.45	-0.02	-0.06	0.02
TCGA-G3-A3CJ-01	FALSE	TRUE	-0.45	-0.28	0.93	0.1	0.15	-0.02	FALSE	0.13	-0.45	-0.04	-0.03	0.01
TCGA-EP-A12J-01	FALSE	TRUE	-0.46	0.83	0.76	0.12	0.47	-0.28	FALSE	-0.27	-0.46	0	-0.05	-0.02
TCGA-DD-AACK-01	FALSE	TRUE	-0.48	-0.06	0.78	-0.39	0.04	-0.48	FALSE	-0.62	-0.48	0	-0.05	-0.02
TCGA-ZP-A9CY-01	FALSE	TRUE	-0.5	0.22	0.81	0.02	0.06	-0.12	FALSE	0.58	-0.5	-0.13	0.14	-0.06
TCGA-DD-AACJ-01	FALSE	TRUE	-0.5	-0.94	0.9	-0.49	0.14	-0.38	FALSE	-0.35	-0.5	-0.02	-0.12	0.06
TCGA-DD-A73D-01	FALSE	TRUE	-0.51	0.1	0.95	-0.6	-0.02	-0.7	FALSE	-1.34	-0.51	0	-0.13	0.05
TCGA-DD-A4NK-01	FALSE	TRUE	-0.52	-0.39	0.85	-0.4	-0.04	-0.62	FALSE	0.01	-0.52	-0.07	-0.01	0
TCGA-G3-A25V-01	FALSE	TRUE	-0.52	1.01	0.65	0.64	0.59	0.6	FALSE	1.31	-0.52	-0.14	0.14	-0.07
TCGA-DD-A11D-01	FALSE	TRUE	-0.52	-0.18	0.84	-0.27	0.06	-0.45	FALSE	0.31	-0.52	-0.08	0.06	-0.04
TCGA-DD-AADU-01	FALSE	TRUE	-0.53	-0.45	0.93	-0.23	0.23	-0.45	FALSE	0.03	-0.53	-0.03	-0.05	0
TCGA-DD-AAW1-01	FALSE	TRUE	-0.56	0.47	0.74	-0.26	0.19	-0.61	FALSE	-0.22	-0.56	-0.04	-0.01	-0.03
TCGA-DD-A3A2-01	FALSE	TRUE	-0.59	0.12	0.99	-0.09	0.37	-0.08	FALSE	0.15	-0.59	-0.09	-0.02	0.03
TCGA-DD-AACX-01	FALSE	TRUE	-0.59	0.32	0.79	-0.02	0.11	-0.05	FALSE	-0.54	-0.59	0.03	-0.11	-0.01
TCGA-DD-AACE-01	FALSE	TRUE	-0.6	0.44	0.79	0.01	-0.04	0.15	FALSE	-0.41	-0.6	-0.05	-0.01	-0.02
TCGA-G3-A7M8-01	FALSE	TRUE	-0.62	-1.23	0.89	-0.42	0.71	-0.72	FALSE	0.43	-0.62	-0.12	0.04	0
TCGA-WX-AA46-01	FALSE	TRUE	-0.62	-0.39	0.93	-0.1	0.9	-0.16	FALSE	0.14	-0.62	-0.11	0.06	-0.04
TCGA-DD-A1EK-01	FALSE	TRUE	-0.64	-0.27	0.74	0	0.75	-0.32	FALSE	0.53	-0.64	-0.1	0.03	-0.01
TCGA-DD-AAVY-01	FALSE	TRUE	-0.67	0	0.83	-0.28	-0.13	-0.39	FALSE	-0.88	-0.67	-0.03	-0.09	0.02
TCGA-DD-A4NL-01	FALSE	TRUE	-0.68	-0.82	0.77	-0.24	-0.02	0.08	FALSE	0.89	-0.68	-0.14	0.1	-0.05
TCGA-DD-AACY-01	FALSE	TRUE	-0.73	-0.22	0.75	-0.15	-0.16	0.41	FALSE	0.43	-0.73	-0.06	-0.02	-0.02
TCGA-DD-AAE1-01	FALSE	TRUE	-0.73	0.57	0.34	0.1	-0.17	-0.44	FALSE	-0.27	-0.73	-0.02	-0.13	0.04
TCGA-DD-AADR-01	FALSE	TRUE	-0.74	0.78	0.88	0.26	-0.35	0.48	TRUE	-0.74	-0.24	0.04	-0.13	0.04
TCGA-ZP-A9D4-01	FALSE	TRUE	-0.75	0.14	0.77	-0.67	0.08	-0.77	FALSE	-0.54	-0.75	-0.04	-0.07	0
TCGA-ZS-A9CF-01	FALSE	TRUE	-0.81	0.52	0.77	-0.05	0.34	-0.35	FALSE	-0.13	-0.81	-0.01	-0.09	-0.02
TCGA-MI-A75C-01	FALSE	TRUE	-0.83	0.4	0.87	0.49	0.08	0.27	FALSE	0.25	-0.83	0.03	-0.15	-0.01
TCGA-2Y-A9H9-01	FALSE	TRUE	-0.86	0.44	0.83	0.24	0.02	0.23	FALSE	0.32	-0.86	-0.02	-0.06	-0.05
TCGA-DD-AAED-01	FALSE	TRUE	-0.9	-0.76	0.31	-0.62	-0.56	-0.66	FALSE	-0.4	-0.9	0.01	-0.14	-0.02
TCGA-DD-AAEA-01	FALSE	TRUE	-1	0.95	0.53	0.94	0.86	1.71	FALSE	0.24	-1	-0.01	-0.13	-0.02
TCGA-G3-A6UC-01	FALSE	TRUE	-1.03	-0.27	0.9	-0.5	0.17	-1.01	FALSE	-0.4	-1.03	-0.06	-0.09	0
TCGA-LG-A9QD-01	FALSE	TRUE	-1.04	1.12	0.9	0.49	0.35	0.36	FALSE	0.53	-1.04	-0.09	0.01	-0.07
TCGA-DD-AACF-01	FALSE	TRUE	-1.05	0.52	0.86	0.35	0.73	-0.1	FALSE	0.02	-1.05	0	-0.15	-0.02
TCGA-3K-AAZ8-01	FALSE	TRUE	-1.16	1.41	0.92	0.65	0.08	0.71	FALSE	0.13	-1.16	-0.05	-0.08	-0.04
TCGA-DD-A3A1-01	FALSE	TRUE	-1.19	0.15	0.97	0.43	0.27	0.67	FALSE	0.26	-1.19	-0.05	-0.13	-0.02
TCGA-2Y-A9GW-01	FALSE	TRUE	-1.21	0.85	0.24	0.62	0.86	-0.68	FALSE	1.13	-1.21	-0.19	0.1	-0.07
TCGA-5R-AA1C-01	FALSE	TRUE	-1.22	1.48	0.94	0.46	-0.18	0.8	TRUE	-1.22	-0.24	-0.02	-0.05	0.03
TCGA-GJ-A3OU-01	FALSE	TRUE	-1.28	1.66	0.07	1.45	1.69	-0.09	FALSE	1.54	-1.28	-0.21	0.11	-0.07
TCGA-2Y-A9GV-01	FALSE	TRUE	-1.54	-0.16	0.65	0.06	-0.04	-0.3	FALSE	0.63	-1.54	-0.17	0.01	-0.06
TCGA-DD-A73A-01	FALSE	TRUE	-1.82	0.19	0.83	0.09	-0.08	1.29	FALSE	0.34	-1.82	-0.12	-0.13	-0.02

## Sheet: Table S4_4
Table S4_4 The mRNAsi scores of HCC subgroups.
Patients	mRNAsi score
TCGA-G3-AAV0-01	0.496013
TCGA-DD-AAE3-01	0.45421
TCGA-DD-A11D-01	0.38112
TCGA-G3-A6UC-01	0.551237
TCGA-K7-A6G5-01	0.470489
TCGA-DD-AAE4-01	0.708332
TCGA-MI-A75G-01	0.567124
TCGA-DD-AADV-01	0.555628
TCGA-LG-A9QD-01	0.436542
TCGA-DD-AACD-01	0.666843
TCGA-DD-AAE7-01	0.344353
TCGA-DD-AADJ-01	0.557782
TCGA-CC-5259-01	0.631039
TCGA-HP-A5MZ-01	0.264837
TCGA-DD-A39X-01	0.635006
TCGA-2Y-A9GU-01	0.510324
TCGA-G3-A7M8-01	0.418364
TCGA-DD-A3A5-01	0.60605
TCGA-DD-AADM-01	0.690005
TCGA-DD-AADU-01	0.518468
TCGA-CC-A7IF-01	0.608382
TCGA-DD-AAVW-01	0.271944
TCGA-DD-A3A7-01	0.702155
TCGA-EP-A2KA-01	0.610932
TCGA-ED-A7PZ-01	0.671481
TCGA-G3-A25U-01	0.760778
TCGA-2Y-A9GZ-01	0.58176
TCGA-DD-AADK-01	0.457722
TCGA-G3-A5SI-01	0.76642
TCGA-DD-A4NI-01	0.320773
TCGA-DD-A73A-01	0.547774
TCGA-ZS-A9CG-01	0.313588
TCGA-FV-A4ZP-01	0.787194
TCGA-DD-AACJ-01	0.695218
TCGA-DD-AAVZ-01	0.609612
TCGA-DD-AAVR-01	0.390352
TCGA-RC-A7SB-01	0.541895
TCGA-3K-AAZ8-01	0.624491
TCGA-UB-A7MF-01	0.682893
TCGA-ZP-A9D1-01	0.359644
TCGA-ZP-A9D0-01	0.477097
TCGA-WQ-AB4B-01	0.483439
TCGA-NI-A4U2-01	0.428642
TCGA-RC-A7SK-01	0.549578
TCGA-DD-AADS-01	0.671903
TCGA-DD-A73F-01	0.673669
TCGA-DD-A11C-01	0.553504
TCGA-DD-AACO-01	0.691174
TCGA-DD-AAED-01	0.638619
TCGA-BC-A10X-01	0.26226
TCGA-DD-AAD3-01	0.252809
TCGA-K7-A5RG-01	0.629035
TCGA-DD-AACF-01	0.752233
TCGA-DD-A3A2-01	0.500078
TCGA-DD-A115-01	0.535792
TCGA-DD-AADO-01	0.761321
TCGA-BC-A110-01	0.196481
TCGA-DD-AAW3-01	0.56233
TCGA-2Y-A9H7-01	0.615887
TCGA-RC-A6M5-01	0.177027
TCGA-BC-A69H-01	0.736187
TCGA-BC-A69I-01	0.360456
TCGA-ED-A627-01	0.0965829
TCGA-DD-AACC-01	0.570898
TCGA-DD-A3A9-01	0.361171
TCGA-ES-A2HT-01	0.538643
TCGA-2Y-A9H3-01	0.450969
TCGA-2Y-A9HB-01	0.518641
TCGA-DD-A3A6-01	0.075019
TCGA-BW-A5NO-01	0.68894
TCGA-CC-A7IL-01	0.732118
TCGA-DD-AACV-01	0.848734
TCGA-KR-A7K2-01	0.415385
TCGA-DD-AAEG-01	0.587491
TCGA-DD-AACG-01	0.913486
TCGA-CC-A123-01	0.726528
TCGA-DD-AAVQ-01	0.56733
TCGA-RC-A7S9-01	0.692973
TCGA-DD-A4NK-01	0.470243
TCGA-DD-AADI-01	0.475515
TCGA-DD-AACY-01	0.514432
TCGA-DD-AAW0-01	0.399161
TCGA-5R-AAAM-01	0.252529
TCGA-ZS-A9CF-01	0.591543
TCGA-DD-AACI-01	0.585742
TCGA-EP-A3JL-01	0.582149
TCGA-ES-A2HS-01	0.490958
TCGA-DD-A119-01	0.578056
TCGA-2Y-A9H1-01	0.628215
TCGA-G3-A5SK-01	0.398933
TCGA-DD-AAE1-01	0.607121
TCGA-DD-AADN-01	1
TCGA-DD-A73C-01	0.445205
TCGA-FV-A495-01	0.538812
TCGA-DD-A1EK-01	0.486671
TCGA-DD-AAD6-01	0.807357
TCGA-G3-A3CH-01	0.536854
TCGA-DD-AAEA-01	0.695094
TCGA-CC-A7IH-01	0.382586
TCGA-MI-A75H-01	0.520507
TCGA-DD-AAD8-01	0.62461
TCGA-DD-A73D-01	0.729212
TCGA-K7-A5RF-01	0.278477
TCGA-DD-AACT-01	0.444039
TCGA-DD-A73B-01	0.767347
TCGA-DD-A4NO-01	0.426578
TCGA-2Y-A9H8-01	0.690239
TCGA-DD-A3A8-01	0.43759
TCGA-RC-A7SF-01	0.485364
TCGA-HP-A5N0-01	0.263762
TCGA-DD-A73E-01	0.447132
TCGA-G3-A5SL-01	0.46621
TCGA-2Y-A9H6-01	0.242521
TCGA-WX-AA47-01	0.629928
TCGA-MR-A520-01	0.466004
TCGA-DD-A3A1-01	0.713628
TCGA-DD-AADF-01	0.778437
TCGA-G3-A7M7-01	0.524246
TCGA-DD-AADQ-01	0.694198
TCGA-DD-AAVX-01	0.524791
TCGA-MI-A75E-01	0.429534
TCGA-DD-A11B-01	0.517752
TCGA-LG-A6GG-01	0.515072
TCGA-DD-A39V-01	0.59884
TCGA-ZP-A9CY-01	0.339526
TCGA-NI-A8LF-01	0.250146
TCGA-DD-AAE2-01	0.561302
TCGA-KR-A7K8-01	0.477913
TCGA-EP-A12J-01	0.51694
TCGA-DD-A4NV-01	0.288115
TCGA-BC-A3KF-01	0.603021
TCGA-G3-A3CK-01	0.536799
TCGA-ZS-A9CE-01	0.619237
TCGA-DD-AADA-01	0.341945
TCGA-G3-A25X-01	0.512691
TCGA-2Y-A9H5-01	0.358941
TCGA-G3-A3CG-01	0.482485
TCGA-ED-A4XI-01	0.237304
TCGA-2Y-A9GT-01	0.327347
TCGA-DD-A1EB-01	0.486329
TCGA-DD-AACE-01	0.481451
TCGA-2Y-A9H9-01	0.551178
TCGA-CC-5262-01	0.47997
TCGA-G3-AAV2-01	0.419791
TCGA-UB-A7ME-01	0.542532
TCGA-DD-A11A-01	0.655856
TCGA-DD-AAEK-01	0.388677
TCGA-EP-A2KB-01	0.525718
TCGA-G3-A5SM-01	0.433712
TCGA-DD-AAEB-01	0.483735
TCGA-BC-A5W4-01	0.696367
TCGA-BD-A3ER-01	0.358816
TCGA-ZP-A9CV-01	0.50174
TCGA-DD-AADY-01	0.57753
TCGA-G3-A3CI-01	0.359745
TCGA-FV-A496-01	0.525758
TCGA-XR-A8TE-01	0.234504
TCGA-DD-A3A4-01	0.635078
TCGA-RC-A6M4-01	0.637503
TCGA-ED-A7PY-01	0.555937
TCGA-DD-A113-01	0.614146
TCGA-KR-A7K0-01	0.299579
TCGA-DD-A4NL-01	0.251748
TCGA-DD-A39Z-01	0.681535
TCGA-DD-AADG-01	0.485023
TCGA-DD-AAW1-01	0.430995
TCGA-DD-AAC9-01	0.415858
TCGA-G3-A25Z-01	0.553835
TCGA-DD-A4NF-01	0.359183
TCGA-G3-A25V-01	0.337317
TCGA-G3-AAV5-01	0.70504
TCGA-BD-A2L6-01	0.659285
TCGA-XR-A8TF-01	0.69882
TCGA-G3-A7M5-01	0.694586
TCGA-WX-AA46-01	0.379209
TCGA-O8-A75V-01	0.485615
TCGA-BC-A10S-01	0.342906
TCGA-DD-A1ED-01	0.251337
TCGA-CC-A9FS-01	0.655613
TCGA-T1-A6J8-01	0.477178
TCGA-DD-A73G-01	0.607264
TCGA-KR-A7K7-01	0.790063
TCGA-XR-A8TC-01	0.61539
TCGA-ZS-A9CD-01	0.378819
TCGA-2Y-A9GV-01	0.346889
TCGA-BC-A10T-01	0.476244
TCGA-DD-AAEI-01	0.742776
TCGA-FV-A2QQ-01	0.58378
TCGA-EP-A2KC-01	0.45374
TCGA-DD-A3A3-01	0.694994
TCGA-G3-AAV3-01	0.477496
TCGA-G3-A3CJ-01	0.549796
TCGA-DD-A4NP-01	0.371341
TCGA-5R-AA1D-01	0.129274
TCGA-DD-AAW2-01	0.522085
TCGA-2Y-A9GW-01	0.395082
TCGA-DD-A116-01	0.563082
TCGA-G3-AAUZ-01	0.6243
TCGA-DD-AAD2-01	0.390499
TCGA-DD-AADR-01	0.861741
TCGA-DD-AAVU-01	0.795926
TCGA-DD-AADP-01	0.498357
TCGA-2Y-A9H4-01	0.694498
TCGA-EP-A26S-01	0.519597
TCGA-ED-A7XO-01	0.54177
TCGA-DD-AAVP-01	0.502785
TCGA-MI-A75C-01	0.710647
TCGA-DD-A39W-01	0.461787
TCGA-DD-AAVY-01	0.616473
TCGA-5C-AAPD-01	0.656537
TCGA-DD-AAEH-01	0.56856
TCGA-UB-AA0V-01	0.240105
TCGA-DD-A118-01	0.503811
TCGA-DD-A1EF-01	0.504667
TCGA-WJ-A86L-01	0.549084
TCGA-CC-5263-01	0.645345
TCGA-DD-AAE6-01	0.867174
TCGA-DD-A1EL-01	0.748054
TCGA-G3-A7M6-01	0.274323
TCGA-DD-AACQ-01	0.604368
TCGA-G3-A25T-01	0.428828
TCGA-DD-AADB-01	0.682049
TCGA-UB-A7MA-01	0.47193
TCGA-DD-AAD0-01	0.617488
TCGA-BC-4072-01	0.465464
TCGA-UB-A7MD-01	0.419303
TCGA-DD-AACS-01	0.650984
TCGA-DD-AAEE-01	0.586272
TCGA-CC-A7IE-01	0.642697
TCGA-WX-AA44-01	0.465967
TCGA-ED-A7XP-01	0.460458
TCGA-BW-A5NQ-01	0.947195
TCGA-FV-A3R3-01	0.130195
TCGA-DD-AACL-01	0.805443
TCGA-DD-A4NJ-01	0.571228
TCGA-CC-A5UE-01	0.788157
TCGA-CC-A9FW-01	0.535026
TCGA-DD-A4NQ-01	0.670546
TCGA-RC-A7SH-01	0.621181
TCGA-G3-AAV1-01	0.542591
TCGA-DD-AA3A-01	0.530144
TCGA-2Y-A9HA-01	0.608259
TCGA-MR-A8JO-01	0.161835
TCGA-5R-AA1C-01	0.630093
TCGA-DD-A4NH-01	0.454322
TCGA-BC-A10R-01	0.282716
TCGA-ED-A459-01	0.651848
TCGA-CC-A7IK-01	0.645693
TCGA-FV-A4ZQ-01	0.775352
TCGA-G3-A25S-01	0.825671
TCGA-FV-A23B-01	0.519109
TCGA-DD-AADD-01	0.809302
TCGA-RC-A6M3-01	0.838481
TCGA-CC-5260-01	0.339913
TCGA-G3-AAV7-01	0.628361
TCGA-DD-A39Y-01	0.803284
TCGA-G3-A25Y-01	0.449137
TCGA-DD-A1EG-01	0.590465
TCGA-5C-A9VH-01	0.354253
TCGA-BC-A10Q-01	0.334587
TCGA-CC-5258-01	0.70337
TCGA-G3-A7M9-01	0.800354
TCGA-DD-A4NB-01	0.0434617
TCGA-ED-A66X-01	0.462085
TCGA-DD-A114-01	0.525664
TCGA-XR-A8TG-01	0.436148
TCGA-CC-A3MA-01	0.410904
TCGA-DD-AADC-01	0.710673
TCGA-DD-AAD1-01	0.227776
TCGA-DD-AAVV-01	0.404942
TCGA-ED-A8O5-01	0.495058
TCGA-ED-A97K-01	0.235816
TCGA-2V-A95S-01	0.60876
TCGA-UB-A7MB-01	0.717431
TCGA-CC-5264-01	0.747328
TCGA-ED-A66Y-01	0.46496
TCGA-BC-A8YO-01	0.732959
TCGA-DD-A4NR-01	0.633748
TCGA-CC-A8HU-01	0.733153
TCGA-XR-A8TD-01	0.44423
TCGA-DD-A4ND-01	0.145332
TCGA-ZP-A9D2-01	0.407334
TCGA-2Y-A9GX-01	0.214512
TCGA-BC-A216-01	0.669457
TCGA-CC-A3MB-01	0.603802
TCGA-DD-A4NE-01	0.567856
TCGA-RC-A6M6-01	0.646674
TCGA-CC-A5UD-01	0.490014
TCGA-BC-A10U-01	0.527692
TCGA-BC-A10Y-01	0.773769
TCGA-CC-A3M9-01	0.577259
TCGA-BW-A5NP-01	0.648605
TCGA-G3-AAV4-01	0.558419
TCGA-BC-A10W-01	0.754587
TCGA-CC-A8HS-01	0.64648
TCGA-DD-A1EE-01	0.586501
TCGA-FV-A3I1-01	0.515405
TCGA-G3-A5SJ-01	0.475281
TCGA-BC-A3KG-01	0.73016
TCGA-DD-AAVS-01	0.535169
TCGA-FV-A3I0-01	0.195863
TCGA-CC-A9FV-01	0.0520011
TCGA-BC-A217-01	0.811679
TCGA-DD-AAD5-01	0.633597
TCGA-2Y-A9H0-01	0.909879
TCGA-DD-A1EI-01	0.360304
TCGA-LG-A9QC-01	0.427958
TCGA-GJ-A3OU-01	0.334946
TCGA-CC-A7IJ-01	0.452983
TCGA-DD-AACA-01	0.483019
TCGA-2Y-A9GS-01	0.712418
TCGA-DD-AACW-01	0.690007
TCGA-FV-A3R2-01	0.659311
TCGA-5C-A9VG-01	0.626607
TCGA-ZP-A9CZ-01	0.691867
TCGA-DD-A1EJ-01	0.65296
TCGA-DD-AACU-01	0.471697
TCGA-2Y-A9H2-01	0.538562
TCGA-CC-5261-01	0.425742
TCGA-EP-A3RK-01	0.652805
TCGA-BC-A112-01	0.588725
TCGA-DD-AACX-01	0.664523
TCGA-DD-A4NN-01	0.552546
TCGA-DD-AACZ-01	0.727313
TCGA-DD-AAE0-01	0.579108
TCGA-YA-A8S7-01	0.359099
TCGA-2Y-A9GY-01	0.773495
TCGA-ED-A8O6-01	0.599748
TCGA-ZP-A9D4-01	0.566091
TCGA-DD-A1EH-01	0.491935
TCGA-BC-A10Z-01	0.742969
TCGA-ED-A7PX-01	0.458335
TCGA-CC-A8HV-01	0.569782
TCGA-GJ-A9DB-01	0.411206
TCGA-MI-A75I-01	0.658464
TCGA-CC-A5UC-01	0.66182
TCGA-DD-AACK-01	0.613455
TCGA-DD-AADL-01	0.648749
TCGA-UB-A7MC-01	0.667641
TCGA-ED-A82E-01	0.276391
TCGA-UB-AA0U-01	0.446092
TCGA-CC-A9FU-01	0.772848
TCGA-DD-AADW-01	0.453995
TCGA-DD-AACB-01	0.640127
TCGA-DD-AACP-01	0.787342
TCGA-DD-A4NS-01	0
TCGA-DD-AACH-01	0.588003
TCGA-DD-AACN-01	0.313201
TCGA-PD-A5DF-01	0.417889
TCGA-CC-A7IG-01	0.643372
TCGA-4R-AA8I-01	0.587042
TCGA-DD-A4NG-01	0.466499
TCGA-ED-A5KG-01	0.434491
TCGA-CC-A1HT-01	0.615663
TCGA-DD-AAC8-01	0.494119
TCGA-BD-A3EP-01	0.323491
TCGA-QA-A7B7-01	0.818013
TCGA-DD-A1EA-01	0.613029
TCGA-CC-A3MC-01	0.626317
TCGA-FV-A2QR-01	0.377933
TCGA-K7-AAU7-01	0.258029
TCGA-G3-AAV6-01	0.589793
TCGA-CC-A8HT-01	0.859387
TCGA-RG-A7D4-01	0.850583
TCGA-DD-AAE9-01	0.549655
TCGA-DD-A4NA-01	0.301656
TCGA-DD-A1EC-01	0.57439
TCGA-BC-4073-01	0.55456
TCGA-WQ-A9G7-01	0.677868
TCGA-CC-A7II-01	0.916659
TCGA-GJ-A6C0-01	0.534256
