# Supplementary material for: A Mitophagy-Related Gene Signature for Subtype Identification and Prognosis Prediction of Hepatocellular Carcinoma
Source: Int J Mol Sci. 2022 Oct 12;23(20):12123. doi: 10.3390/ijms232012123 (PMC9603050; doi:10.3390/ijms232012123)
Supplement: Supplementary file 1 [file ijms-23-12123-s001.zip › Table S5.xlsx]

## Sheet: Table S5
Table S5 Comparison of ferroptosis and N6-me-thyladenosine between HCC subgroups.

## Sheet: Table S5_1
Table S5_1 Heatmap and the boxplots of ferroptosis between HCC subgroups.
Patients	CDKN1A	HSPA5	EMC2	SLC7A11	NFE2L2	MT1G	HSPB1	GPX4	FANCD2	CISD1	FDFT1	SLC1A5	SAT1	TFRC	RPL8	NCOA4	LPCAT3	GLS2	DPP4	CS	CARS1	ATP5MC3	ALOX15	ACSL4	ATL1	Group
TCGA-G3-AAV0-01	6.63787	9.93888	3.39943	0.0375504	3.21644	0.950515	8.65704	9.67926	0.533836	4.06092	3.32313	1.89873	8.76154	3.36617	10.2906	6.43073	1.89985	0.690809	4.02534	3.43598	4.17624	6.16167	0.624518	6.11647	0.101539	C1
TCGA-DD-AAE3-01	6.56714	8.83263	4.89505	0.0385115	5.1393	10.6082	11.1095	10.7362	0.511617	5.15931	6.28655	3.334	9.46575	3.8589	10.5272	7.72802	1.02208	2.12454	7.05625	4.247	2.53193	6.76534	0.268329	2.55607	0.421298	C1
TCGA-DD-A11D-01	7.22147	9.85131	4.38983	0.337037	5.29505	6.77209	9.42284	9.00324	0.775086	4.2596	6.45663	2.61673	8.73287	5.66709	9.41858	8.06114	4.82763	4.2328	6.26405	4.60525	3.80807	6.17868	0.405114	7.14951	0.541611	C1
TCGA-G3-A6UC-01	7.43068	9.23625	4.78956	0.133065	6.3971	8.76053	8.60198	8.75773	1.63453	4.38177	5.68934	1.58536	9.06532	5.58112	10.1151	8.22818	2.94594	0.391328	7.67287	5.72732	3.5874	5.91039	0.144432	3.92946	0.685571	C1
TCGA-K7-A6G5-01	7.11036	9.08474	5.01868	0.48702	5.17241	6.60392	8.61427	8.78675	0.831276	5.03895	5.26366	4.2642	9.01957	4.36555	11.2494	7.02935	4.12627	0.870561	4.34787	4.855	3.43529	6.679	0.0908731	9.92786	0.355213	C1
TCGA-DD-AAE4-01	6.53044	8.70755	3.87672	0.297145	3.56933	2.94912	8.9834	9.13663	1.62648	5.55445	5.21295	3.2711	9.06588	3.2676	10.2802	6.60094	0.519555	1.32364	3.30315	3.88943	2.97601	5.58538	0.187596	2.95961	0.0258359	C1
TCGA-MI-A75G-01	6.12501	8.93417	4.38933	0.442137	5.61647	8.46897	9.91295	9.88243	1.17884	4.94838	6.49374	2.58848	9.27444	5.32426	10.4479	8.02999	4.65997	3.64989	4.87287	5.07499	3.07604	6.7578	0.0223784	8.04305	0.315098	C1
TCGA-DD-AADV-01	6.57616	8.42766	4.77491	1.07103	5.80921	9.2214	9.48873	9.53485	3.38181	4.93587	5.9597	3.00253	7.75109	4.48664	10.0726	7.54583	4.44097	4.52038	5.50062	4.76788	3.39526	6.98173	0.606339	5.62269	0.915034	C1
TCGA-LG-A9QD-01	6.82445	9.72615	5.54081	0.0559357	5.01483	11.0072	9.27235	7.90629	0.515117	4.22148	4.87197	2.52946	8.85589	3.40033	10.6441	6.86185	3.43897	2.87841	4.61855	4.54598	4.1623	6.15368	0.111045	6.54956	0.232546	C1
TCGA-DD-AACD-01	6.32337	9.56182	5.1503	0.872607	4.06045	10.4045	10.8007	8.98065	0.7045	4.82688	5.02756	3.27438	9.53882	2.73049	12.3161	6.40515	0.283881	0.0236702	3.66437	4.06981	3.31334	6.2373	0.111693	4.32554	0.0664463	C1
TCGA-DD-AAE7-01	7.00652	8.9621	4.59321	0.406023	4.83258	15.0505	8.45809	8.64786	0.881201	3.84872	4.67247	3.18355	8.59932	3.83574	9.63896	6.85251	2.92077	3.55632	3.85748	3.85154	3.34969	6.13542	0.157196	5.79767	0.466732	C1
TCGA-DD-AADJ-01	6.077	9.56235	4.13407	0.107113	3.88215	4.87294	10.0989	9.05503	1.1838	5.10756	6.20736	2.48815	8.69419	4.8466	10.5756	7.01	3.82045	1.61088	4.56414	5.09789	2.99457	7.53259	0.0683648	7.27144	0.179645	C1
TCGA-CC-5259-01	4.21037	8.95993	3.73177	0.0796409	3.38448	9.701	10.5527	8.76189	0.407831	4.15651	5.50388	3.41858	8.97758	2.5938	11.3616	6.33853	0.357671	0.0269904	2.00472	3.08953	3.16517	5.48339	0.0648085	7.14022	0	C1
TCGA-HP-A5MZ-01	7.18248	9.05798	5.75483	0.780685	5.50557	5.63508	9.93859	9.00733	1.02242	4.8745	5.45042	4.02367	9.31327	4.73046	10.6304	7.34549	3.75791	2.7211	5.42992	5.14769	3.28164	6.76049	0.147975	8.92524	0.936268	C1
TCGA-DD-A39X-01	7.71275	8.90379	5.25639	1.14514	4.78984	6.87952	10.7251	8.77403	0.772611	5.32034	5.16665	5.23614	7.34896	4.65072	12.8451	6.46244	1.21037	0.643608	3.20344	4.37271	3.04677	7.31996	0.12945	1.79762	0.274301	C1
TCGA-2Y-A9GU-01	5.55671	10.3542	4.6695	0.548557	4.90312	0.836537	8.88617	8.44403	1.29103	5.61478	4.21534	1.68861	8.53809	5.42853	9.31761	8.05445	4.69141	4.41484	4.68879	5.43206	3.28518	7.68037	0.103258	6.26776	0.491078	C1
TCGA-G3-A7M8-01	8.65144	10.1249	3.9991	1.00911	4.61081	6.5432	7.51717	7.95772	1.00707	5.06512	5.32596	2.68463	10.0144	2.25324	9.43134	7.5014	3.77853	5.43706	5.60314	4.45125	3.88904	6.88416	0.289566	6.29364	0.733433	C1
TCGA-DD-A3A5-01	8.64424	8.86436	4.43278	0.441885	5.03235	1.82355	10.3922	9.38955	2.08176	5.40957	6.49203	2.14721	8.17259	4.77296	9.91794	7.4752	3.12656	3.79477	5.32381	4.15499	3.08372	6.65935	0.67895	4.38035	0.313466	C1
TCGA-DD-AADM-01	6.28827	9.49329	5.34264	1.04448	4.05652	3.69781	10.4083	9.68667	1.03184	5.08109	5.50167	3.11932	8.12152	4.62072	11.0057	6.02615	1.27117	1.64496	4.42751	4.11693	3.29193	6.78503	0.183098	5.01617	0.110011	C1
TCGA-DD-AADU-01	5.8247	8.91809	5.4475	1.99119	5.41296	10.9106	10.3398	9.15616	0.482257	4.5835	7.30463	1.71287	7.68861	4.07765	11.3717	8.06178	1.54982	0.232142	8.3403	3.94991	2.81323	6.36697	0.0891084	1.15598	0.261796	C1
TCGA-CC-A7IF-01	7.38037	8.37507	5.52471	0.192501	5.11802	0.471405	9.62449	9.27534	1.49379	4.7682	5.90097	3.96678	8.19471	4.0698	10.8934	6.9735	2.78106	3.86233	5.15393	4.15903	2.30924	7.04307	0.399778	1.17236	0.449566	C1
TCGA-DD-AAVW-01	7.18128	9.43494	5.93182	0.698946	5.53696	4.62723	10.3726	9.05207	2.05981	5.17044	7.66034	3.05613	8.02895	4.18616	9.81878	8.10788	3.5733	2.74553	5.82214	4.80726	3.41393	6.83172	0.575885	7.92734	1.81883	C1
TCGA-DD-A3A7-01	5.82284	8.06533	3.96101	2.45755	3.65849	4.11395	11.6622	10.7589	0.892077	4.86555	3.46442	5.27622	7.15126	4.67393	12.4087	5.536	0.0921792	0.610689	2.86514	5.00907	3.53403	7.29369	0.0645958	6.87547	0.0996354	C1
TCGA-EP-A2KA-01	6.07573	9.94966	4.8625	1.38261	5.93399	2.02923	9.9305	8.74829	1.89994	4.76264	6.25233	5.24095	7.76066	4.41907	11.8908	6.43963	3.97483	0.184141	4.74213	4.84138	4.46135	7.58836	0	6.27678	0.175431	C1
TCGA-ED-A7PZ-01	5.66362	9.23182	4.96295	0.511259	4.26192	5.78804	9.60017	10.0995	1.52612	6.34564	6.13171	3.04816	7.1749	4.65146	11.3468	7.92669	2.99426	0.276582	6.63202	5.89095	3.47071	7.83727	0.153767	5.48477	0.351597	C1
TCGA-G3-A25U-01	7.25278	9.76665	5.29933	0.0874421	6.04446	10.9771	7.31902	8.57523	2.3863	4.0417	6.75122	1.77893	9.40674	6.40337	10.6902	7.05231	4.4559	5.53979	5.22145	4.96576	4.89763	6.73793	0.16096	1.58195	0.809467	C1
TCGA-2Y-A9GZ-01	8.99826	9.09933	4.21037	0.125952	5.68689	10.6626	8.21971	9.48098	1.47789	3.95186	6.33844	2.48524	8.09996	6.09145	9.42823	7.58168	4.41999	5.73958	5.75973	4.4325	3.83087	6.12992	0.977703	4.95969	1.15554	C1
TCGA-DD-AADK-01	7.54693	9.65014	5.24722	0.55951	4.34051	1.53651	10.465	8.76373	1.36711	4.60137	6.09738	4.73015	8.51497	4.2996	11.1562	6.46271	3.05908	1.09679	4.11728	4.78289	4.10862	6.4413	0.391146	6.51405	0.587907	C1
TCGA-G3-A5SI-01	7.31417	10.3995	5.53908	0.173508	4.56307	4.88535	8.3253	9.08037	1.8341	5.413	5.01311	1.63412	9.20776	5.32096	10.4504	7.43115	4.00879	2.35896	4.13582	4.59121	3.17938	7.35981	0.469612	0.908167	0.339182	C1
TCGA-DD-A4NI-01	6.8319	9.0301	4.8494	0.0739794	5.7443	4.31803	8.21941	8.84426	0.927418	4.95049	4.45348	2.71165	8.72251	4.76072	9.40882	7.93722	3.51477	3.78372	7.54003	5.31271	3.22382	6.52436	0.261566	5.84199	0.404162	C1
TCGA-DD-A73A-01	6.9647	9.37662	4.61109	1.70807	5.19314	6.95018	8.81742	8.72117	1.07643	4.57573	5.56629	3.49992	8.41998	5.44246	10.5159	7.75774	3.63586	4.43739	4.44153	4.4717	3.36061	6.60074	0.164469	8.70494	0.380379	C1
TCGA-ZS-A9CG-01	7.25608	9.117	6.02222	2.10482	6.28726	2.57682	10.7372	9.66944	0.7707	4.83834	5.57407	2.92553	9.0266	4.38028	11.782	7.8638	3.54795	0.121921	7.83677	6.06818	3.32939	6.68467	0	3.78384	1.42858	C1
TCGA-FV-A4ZP-01	5.14951	8.72429	2.65925	1.97864	1.9677	4.30989	13.0664	10.2408	2.17374	6.00696	6.24159	5.82774	7.25712	4.71026	13.6994	4.3412	0.495029	0.0986481	2.4515	4.28288	3.09995	6.34704	0.0960912	4.73191	0.11191	C1
TCGA-DD-AACJ-01	4.71611	8.91658	5.56175	0.125009	4.84161	1.93617	9.65035	9.58873	0.33684	5.58713	5.98781	1.924	7.49586	3.95961	12.0415	7.1902	2.479	0.487037	5.56688	5.09599	3.69249	6.64871	0.0175124	5.71495	0.15629	C1
TCGA-DD-AAVZ-01	6.70096	9.82376	5.58575	0.754352	5.16423	1.49956	9.68682	8.68037	1.91887	4.87573	5.95005	1.83172	8.25057	4.75079	11.1966	8.11332	5.36547	1.70568	6.17377	5.50544	3.36051	6.76372	0.123641	8.75667	0.672486	C1
TCGA-DD-AAVR-01	7.25114	10.1065	5.2599	0.591234	5.56187	2.95877	9.742	9.0442	1.01886	3.76644	5.32081	4.08843	9.46308	4.91512	10.1298	7.04683	2.68213	2.24607	3.78215	4.85299	3.07127	7.28497	0.364064	7.71241	0.457869	C1
TCGA-RC-A7SB-01	4.88757	7.68649	4.2907	0.774239	5.02533	7.95733	9.85301	10.19	1.87624	5.66038	7.51536	2.62228	8.01183	4.88783	10.1682	6.90023	3.23964	3.21071	6.66423	4.38137	3.33962	7.15969	0.160144	4.31163	0.619976	C1
TCGA-3K-AAZ8-01	6.15402	9.57007	5.07023	0.0790465	5.61203	0.311996	10.029	9.25683	0.701998	4.91222	5.80784	2.2031	8.8532	4.86068	10.8293	7.31971	2.86739	1.77378	5.42561	5.21292	3.9916	6.08096	0.257059	7.439	0.238738	C1
TCGA-UB-A7MF-01	8.72446	9.39234	4.46009	0.386944	4.58177	3.82213	9.69084	8.50995	1.88598	5.77172	6.56704	4.59234	8.62405	5.67644	10.0425	7.8051	4.52851	2.67996	3.27138	5.92635	3.7021	7.5394	0.116831	5.39715	0.822372	C1
TCGA-ZP-A9D1-01	6.91891	10.4741	5.16451	2.5484	5.87525	5.93408	9.86071	8.66277	0.978066	4.50895	5.75108	3.47492	8.34088	5.63205	9.48702	7.42275	4.29591	0.544427	5.68389	4.90637	4.03993	6.88901	0.263962	8.36033	0.732772	C1
TCGA-ZP-A9D0-01	6.03095	9.0935	4.41855	0.699056	5.53657	3.60955	8.4887	9.35572	0.613661	4.66104	5.14789	2.11177	8.78039	5.0882	10.0389	8.33293	4.03576	6.05512	5.77041	5.13827	3.44066	7.79138	0.0286733	6.12073	0.340764	C1
TCGA-WQ-AB4B-01	7.07285	8.84597	5.25917	0.458592	3.4877	11.7456	11.3929	9.53651	1.1222	4.9604	5.53663	3.18755	8.58649	2.97938	11.3683	6.31895	1.15679	0.511118	5.25367	4.61303	3.66871	6.30955	0	6.52731	0.28935	C1
TCGA-NI-A4U2-01	5.30458	9.73305	4.69512	2.14657	4.44324	3.29277	7.70997	10.106	0.613552	5.44391	4.58748	2.27587	9.48869	4.40226	9.78234	7.47766	2.75588	2.39303	6.60043	4.52986	4.2479	7.48834	0.146941	2.07374	0.504416	C1
TCGA-RC-A7SK-01	4.8339	7.27366	6.16939	0.164258	5.54912	4.18831	10.138	9.5752	1.6945	4.72978	5.49254	2.96473	7.36562	4.51309	9.89352	7.19928	2.88219	4.95449	5.89078	4.62163	3.08856	7.74316	0.83048	6.47777	0.454707	C1
TCGA-DD-AADS-01	7.23738	7.09112	2.74738	0.0101284	2.885	11.3947	9.90833	9.83484	0.378615	5.41674	4.8923	2.46658	9.08402	2.6978	10.5113	5.57423	0.138379	0.461961	4.8512	3.61731	2.61309	6.7414	0	0.530954	0.0872458	C1
TCGA-DD-A73F-01	8.38253	9.66014	4.12084	2.34529	5.21619	10.5178	9.70384	8.79686	2.16268	5.06922	6.34405	5.04335	7.72591	5.38073	9.28706	8.27489	3.53121	5.12689	6.22446	4.83205	3.50859	6.67492	0.19089	7.35449	0.304164	C1
TCGA-DD-A11C-01	7.73137	9.41536	4.8818	0.243766	5.94194	1.10421	9.61135	9.2381	3.14519	4.59731	4.46101	3.22387	8.63288	6.32773	9.90756	7.88412	5.20726	5.41447	6.09499	4.87455	2.99174	7.218	0.910141	4.98376	0.682575	C1
TCGA-DD-AACO-01	6.98418	8.03969	3.46477	0.0146749	2.71687	5.08191	9.96917	7.95382	1.24919	5.31199	5.56	2.44338	8.32848	4.77968	10.8352	5.11684	0.545107	0.362613	3.7717	4.12771	2.31013	6.55473	0.461098	5.79341	0	C1
TCGA-DD-AAED-01	4.82537	7.65183	4.88075	0.771785	5.05055	14.5904	10.8465	9.37214	1.99493	4.23558	5.90162	5.51237	9.5289	4.88044	12.0366	7.10007	1.0662	0.943847	5.32286	4.95951	3.68766	5.27106	0.0850667	9.65829	0.191888	C1
TCGA-BC-A10X-01	7.28025	8.66422	4.5896	0.226742	6.16309	12.091	8.29269	8.75089	0.799792	4.74613	5.52217	3.50404	8.65585	4.15851	9.72852	8.4055	4.51984	1.32841	5.80639	4.91713	4.37879	6.50075	0.14468	3.36788	0.719915	C1
TCGA-DD-AAD3-01	7.29419	8.67604	4.44308	0.182437	5.50058	2.24094	8.76409	9.26454	1.30699	4.33657	4.92442	2.72232	7.70686	4.55062	9.9984	7.52309	4.13799	2.10321	5.98726	4.73823	3.86929	6.02556	0.25214	8.01941	0.51842	C1
TCGA-K7-A5RG-01	7.19806	8.65482	4.4719	0.953961	5.5214	6.47621	9.877	9.20334	2.80532	4.46988	5.95479	5.03919	8.38979	5.25123	9.64427	7.68158	5.13458	2.30643	6.95789	5.2269	3.64203	6.61163	0.573958	7.19337	0.705095	C1
TCGA-DD-AACF-01	6.82611	10.5959	5.17062	0.0549636	4.67619	0.87367	9.22915	8.82059	2.26973	5.08622	5.2345	2.82934	9.39702	5.75079	10.3096	6.93569	3.13447	0.720898	4.41623	4.36722	3.74365	6.94804	0.126566	1.27543	0.363281	C1
TCGA-DD-A3A2-01	6.69065	8.84833	4.53382	0.0654244	4.3837	2.27362	7.45417	9.30275	0.721183	5.3687	6.0703	1.68087	8.79634	3.58669	9.95091	8.14395	3.26366	4.07364	5.97835	4.93898	4.23221	7.60553	0.129472	2.35483	0.370971	C1
TCGA-DD-A115-01	7.92242	9.33556	3.88929	1.41106	5.32411	8.6669	8.99977	9.06495	2.39095	4.84211	5.74751	2.60472	8.78042	5.30224	9.7105	7.60008	4.44076	6.12282	4.2026	4.34044	3.03053	6.01533	0.404237	3.29149	0.513264	C1
TCGA-DD-AADO-01	6.03681	8.45018	3.71014	0.559598	2.90998	2.3469	10.384	9.26343	1.48004	5.59944	7.05157	4.83712	7.03136	4.77508	12.7353	6.2578	0.359638	0	4.80937	4.79822	2.72798	6.8129	0.0915236	7.66686	0.0364218	C1
TCGA-BC-A110-01	8.82474	8.74645	4.01404	0.150334	5.7456	12.2142	8.44972	8.5808	0.793541	4.52967	5.00423	4.58022	9.57845	4.28297	9.9508	6.9349	3.21294	2.12135	4.52447	4.38918	4.04837	6.33693	0.0442101	5.09062	0.887785	C1
TCGA-DD-AAW3-01	7.52855	9.53096	6.08695	0.529955	5.85614	6.44146	9.80106	9.32003	0.892154	5.24985	6.04342	2.38961	8.26978	4.92571	11.4486	7.78013	3.77455	0.0727144	5.12383	6.00252	3.32195	6.52592	0.210656	5.95921	0.228775	C1
TCGA-2Y-A9H7-01	5.59279	10.0846	4.08647	0.0815195	5.37394	1.50333	9.91768	9.40802	1.43807	4.60077	5.56578	2.6467	7.15634	5.38271	10.2242	7.6182	5.34766	1.52153	4.3652	4.75888	2.94644	6.84371	0.361211	9.1658	0.218681	C1
TCGA-RC-A6M5-01	7.45925	9.96753	4.91461	1.89746	4.8521	12.1278	9.2339	8.8276	0.589075	5.59028	5.17271	4.11186	9.56628	3.19911	10.542	7.86256	3.40426	4.7018	1.92147	5.29995	3.31139	7.14192	0.516978	3.52711	1.33388	C1
TCGA-BC-A69H-01	4.78357	9.57591	4.78274	0.619548	3.84327	6.50387	11.5932	9.57273	2.09187	5.84719	6.20717	5.60718	7.44435	5.19438	12.9394	6.6727	1.84318	0	4.37526	4.7689	3.84874	6.72139	0.0963745	5.92203	0.0383911	C1
TCGA-BC-A69I-01	8.1607	8.53033	4.06837	0.0661294	5.69133	11.238	9.76636	9.31006	0.486585	4.91339	4.84133	3.53724	9.48071	4.63821	10.0241	7.43794	2.5226	0.129138	6.48625	4.58776	3.41304	6.06588	0.0537666	4.33497	0.236184	C1
TCGA-ED-A627-01	8.13272	8.92086	4.86002	0.16687	6.14381	10.9803	9.16754	8.54689	1.40733	4.93823	5.63108	4.37805	9.40325	4.24682	10.1188	8.0367	4.12119	1.57648	5.56011	5.29585	4.12727	6.42663	0.243592	4.7377	1.47048	C1
TCGA-DD-AACC-01	6.27699	9.73143	4.21878	0.165706	4.77266	7.72669	9.26708	8.51929	1.85889	4.3461	5.88223	4.31261	8.71432	3.72812	9.71808	7.18499	3.30029	0.874015	4.39796	4.26987	3.64118	6.31132	0.175463	8.23594	0.265364	C1
TCGA-DD-A3A9-01	7.68882	9.42382	3.82372	0.253485	4.94701	3.92634	9.97058	9.95698	0.955916	4.17724	5.38028	4.78189	8.32403	4.11552	10.8234	7.04086	2.77387	0	1.26315	5.28931	3.64729	7.047	4.89756	7.55765	0.331116	C1
TCGA-ES-A2HT-01	7.68464	9.48941	3.85258	0.408219	3.76482	6.84405	9.87714	9.05444	0.209728	4.42464	4.04972	3.16857	9.21269	3.39944	10.8518	5.41986	1.74024	1.91076	3.99328	4.18284	2.70807	6.58125	0.0172586	8.25687	0.202052	C1
TCGA-2Y-A9H3-01	6.78131	9.31945	4.10319	0.270833	3.4406	2.0491	10.4123	9.55173	0.881958	5.64448	3.74884	3.77492	8.00917	3.60376	10.6747	6.24449	1.30764	0.501201	3.6599	4.92533	3.20574	7.65106	0.213599	6.33718	0.142508	C1
TCGA-2Y-A9HB-01	6.59991	9.14207	4.58531	1.02817	5.61659	0.632652	7.60056	8.52188	0.905225	5.16859	5.91521	2.71703	8.76788	4.64612	9.66976	8.26798	3.85345	4.03766	5.4876	5.95846	3.06386	7.28419	0.209043	8.48965	0.463334	C1
TCGA-DD-A3A6-01	9.00526	7.17304	3.6918	1.07568	3.69072	3.39188	12.7245	10.941	0.566581	5.60864	5.18377	4.29011	9.4808	4.27402	11.0262	6.38143	0.618741	0.0947706	3.77654	6.40488	3.75916	7.01431	0.150725	3.50192	0.86141	C1
TCGA-BW-A5NO-01	9.07966	9.4057	4.0326	0.991082	5.25905	7.89063	9.4039	9.7152	1.9862	4.43726	8.11031	4.34139	6.88717	5.028	10.0067	7.2465	4.59532	3.45157	5.84231	4.94728	3.12267	5.98232	0.666613	7.64323	0.462195	C1
TCGA-CC-A7IL-01	5.79697	9.67344	4.87878	0.615889	5.48093	0.892195	9.71522	10.0095	1.48735	4.97134	6.03797	1.1762	7.71441	4.34682	10.7114	7.55295	3.53581	1.6969	6.10911	4.63794	3.20811	6.72768	0.0207799	6.43573	0.572452	C1
TCGA-DD-AACV-01	8.00911	8.25669	4.55738	0.27927	6.27497	8.17887	10.9168	9.61007	4.23423	4.10484	7.75859	1.8324	7.7491	5.27605	10.3	6.52244	4.56504	4.19879	5.76618	4.73107	3.11475	6.29686	1.21761	4.48101	0.419519	C1
TCGA-KR-A7K2-01	6.06633	9.65241	4.79812	0.137876	4.31848	1.31502	11.1877	9.78561	0.882583	4.21759	5.1756	2.93205	9.09238	4.20425	11.1939	6.05294	1.30126	1.00445	5.13541	5.14333	3.28608	5.9089	0.205396	6.37544	0.162796	C1
TCGA-DD-AAEG-01	8.16845	10.351	6.09282	1.28735	5.02768	2.42782	10.7519	8.3227	1.04319	5.20242	5.38384	4.91388	8.27746	5.69133	11.1537	7.40676	3.75908	2.78496	5.72856	6.08558	3.51232	7.69964	0.635811	4.53499	0.480594	C1
TCGA-DD-AACG-01	3.66097	9.13128	4.63374	0.120376	3.48699	10.5557	9.65257	8.8372	2.72282	5.34548	5.43129	4.66028	8.30116	4.87619	11.4627	6.50211	0.786857	0	5.3138	4.8394	2.75017	6.68537	0.193868	5.77709	0.0455589	C1
TCGA-CC-A123-01	5.81784	10.3203	3.75931	0.125119	3.29537	10.9924	8.71122	9.28085	1.35867	5.4801	5.8864	4.85752	7.66253	3.49305	12.305	5.91162	0.360158	0	3.23574	4.76539	2.87765	6.74714	0.0955249	6.76156	0.0191484	C1
TCGA-DD-AAVQ-01	5.7692	9.82569	4.95551	0.243698	4.72641	1.50191	10.4591	9.00547	2.25057	3.60436	6.02875	4.1681	7.83567	3.46369	11.0726	7.11931	3.7632	0.413414	4.91835	5.24481	3.88687	6.18514	0.343828	8.649	0.321359	C1
TCGA-RC-A7S9-01	7.33463	10.8473	4.49448	0.122316	4.49237	2.99448	8.58026	8.51117	1.53465	5.36503	4.42533	2.91286	8.81423	3.84021	10.674	6.70841	2.51279	0.946644	2.73658	4.47487	3.12191	7.43713	0.108819	7.31341	0.212922	C1
TCGA-DD-A4NK-01	8.12291	9.45837	4.75125	0.104245	5.31863	9.74247	10.2191	8.90147	0.828937	4.46653	5.6641	2.22877	8.59061	5.44355	9.68844	7.43301	3.69651	5.22117	5.25525	5.54326	4.29935	6.30753	0.580533	1.44093	0.717761	C1
TCGA-DD-AADI-01	6.52668	9.82215	5.37458	0.0871527	4.2398	0.485846	10.6295	9.246	1.22908	4.39395	4.86507	3.79813	7.57973	3.71449	11.964	7.40454	1.80513	0.0259217	5.36137	5.22046	3.71342	6.58025	0.338754	6.50218	0.499031	C1
TCGA-DD-AACY-01	6.50064	10.4226	5.73842	0.449274	5.08941	0.411117	9.26962	8.9323	0.491439	4.33427	5.27591	4.05666	7.87634	4.45731	11.6771	6.71217	2.97379	4.5079	4.55457	4.86967	3.72265	6.2804	0.521929	4.29558	0.29498	C1
TCGA-DD-AAW0-01	7.5819	8.93265	5.08619	0.948957	6.11981	5.24255	9.7272	9.21873	1.39734	4.88825	5.42614	4.6062	7.80807	5.24863	10.4914	8.01813	4.03098	2.1117	6.78586	5.27639	4.16901	6.72758	0.929391	7.03379	0.678956	C1
TCGA-5R-AAAM-01	6.55443	9.90771	5.15236	0.5617	5.44023	7.85094	9.31639	9.18262	1.03474	4.76166	6.10636	4.09651	8.40075	3.93184	10.4137	7.66462	5.03916	2.83898	5.93381	5.07219	3.64732	6.41397	0.456348	2.59322	0.756936	C1
TCGA-ZS-A9CF-01	8.10864	9.94288	4.38044	0.436923	6.60651	4.68878	9.48978	8.92543	2.57968	4.83412	6.01085	2.60127	8.73521	5.62495	10.1278	8.29006	4.94915	5.73423	5.60059	5.44685	2.9184	6.11624	0.888999	5.55096	1.02629	C1
TCGA-DD-AACI-01	6.6343	9.49603	5.16689	1.30171	3.67797	6.88049	11.0802	9.39807	0.918863	5.03804	6.30814	5.00055	8.97793	3.48436	11.6091	5.4914	0.839632	0.0766999	3.28649	4.56204	3.57875	6.71288	0.179957	6.73631	0.0729431	C1
TCGA-EP-A3JL-01	6.44941	9.87139	5.78763	0.776104	4.41387	6.80808	10.8214	9.79248	1.58008	4.80126	5.88781	4.67357	7.73907	3.55412	12.0114	6.39534	3.14586	0.895683	5.50737	4.7937	3.17711	6.21249	0.201059	7.33476	0.494297	C1
TCGA-ES-A2HS-01	5.94948	8.91694	3.58541	0.0150084	4.38524	1.65613	9.89466	9.95648	0.61892	5.43724	3.24529	1.86137	7.8172	3.19215	11.815	6.15329	1.10614	0.770907	3.48528	3.61549	2.56411	6.27171	0.0627367	1.86138	0.0968011	C1
TCGA-DD-A119-01	6.13499	9.05677	5.7796	0.49962	4.86032	2.6908	10.2937	9.2873	0.760034	5.3211	5.636	3.36179	8.98187	4.52388	11.7804	6.72271	0.480935	0.384083	4.46279	4.15527	2.66928	7.02364	0.0212564	7.16319	0.187844	C1
TCGA-2Y-A9H1-01	6.53546	8.28259	5.05191	0.65145	4.2298	4.19888	11.0464	9.70117	0.435702	4.81091	5.00166	4.26254	8.10151	2.79872	13.1613	5.99557	0.312124	0.314028	4.0261	4.05614	3.23482	6.37322	0.0281753	6.10723	0.0220443	C1
TCGA-G3-A5SK-01	7.172	9.33407	4.52429	0.0452207	5.52622	6.33531	6.83056	8.51339	0.640629	3.74871	4.17249	2.29105	9.01234	4.12929	9.03205	6.59787	3.56339	3.45125	5.62345	3.77991	2.61833	6.22516	0.124618	1.82264	0.0742698	C1
TCGA-DD-AAE1-01	6.79453	9.41058	4.91537	0.0892913	5.32107	5.15865	10.753	8.80584	1.58764	4.65549	6.80525	2.20699	7.74237	3.49051	11.3473	8.24966	4.44359	1.96734	5.86257	5.37538	2.75108	6.2937	0.389706	8.47591	0.381459	C1
TCGA-DD-AADN-01	2.88871	9.82115	3.58708	2.80359	3.31553	5.71054	10.9722	9.40174	2.25163	4.89913	5.33192	5.78333	7.19995	3.96626	14.0929	5.94482	0.475195	0.093247	1.31635	3.70272	3.25253	6.37448	0	6.82918	0.0301782	C1
TCGA-DD-A73C-01	6.32401	10.135	5.03443	0.0754077	5.01113	1.14247	6.7787	9.38933	1.17545	5.35475	6.22536	2.07826	8.89188	2.36469	9.535	8.66898	5.02073	4.39101	2.70086	5.45368	3.96574	7.44594	0.560832	2.52352	0.737856	C1
TCGA-FV-A495-01	7.39592	8.67503	3.64382	0.509172	4.19916	8.30313	10.4732	10.0191	1.67138	5.542	5.61781	3.87947	8.10532	3.11594	10.7785	5.96511	1.16578	1.03247	4.57775	4.34291	3.10193	6.80113	0.125451	4.40657	0.261351	C1
TCGA-DD-A1EK-01	7.39419	9.43588	4.34381	1.63216	5.56456	4.1796	9.03615	9.67351	1.09188	5.15742	5.44438	3.81102	6.27843	5.04221	9.8102	7.61773	4.92087	2.07921	5.99972	5.03189	4.0769	6.78796	0.684922	5.08094	0.707096	C1
TCGA-DD-AAD6-01	7.01084	9.77459	5.14381	2.26577	5.94241	10.3716	9.59903	8.48904	3.86386	4.73395	7.04079	1.91382	8.52793	5.34425	11.9378	8.0746	3.82206	0.10332	5.89166	5.42773	2.66911	6.07727	0	7.66588	0.145052	C1
TCGA-G3-A3CH-01	7.96797	9.04816	5.32672	0.0950206	5.91216	3.69659	9.62772	8.52895	1.72205	5.17855	6.26921	4.27259	8.88896	4.93643	10.3899	7.63342	3.94693	4.71703	5.00767	4.67642	3.20611	6.5938	0.771722	4.01543	0.452222	C1
TCGA-DD-AAEA-01	6.00397	8.12231	3.9404	0.0406266	4.67562	6.28442	10.7955	9.47484	2.02653	4.94904	6.65181	2.07869	7.85985	4.3872	9.63768	7.04195	2.82031	2.44809	7.11988	5.43403	3.55225	6.13698	0.359784	6.12896	0.528332	C1
TCGA-CC-A7IH-01	5.99017	9.30254	6.17783	2.10607	6.43035	2.89931	10.4605	9.29351	1.36899	5.14523	6.31468	1.84124	9.08443	2.69797	10.7654	8.63277	3.58138	0.106995	7.91004	5.78598	3.92271	6.2857	0	2.92964	1.49225	C1
TCGA-MI-A75H-01	5.94188	8.78654	5.05711	0.151556	5.57476	6.74312	9.33371	9.61064	0.892347	4.74426	4.75223	2.85844	9.31104	3.57809	11.4341	7.57686	2.19195	0.0776314	6.12484	4.84186	3.4681	6.34669	0.123893	4.32687	0.469941	C1
TCGA-DD-AAD8-01	7.69643	9.09496	3.6913	1.96382	6.18626	2.41133	9.64899	9.81834	2.96715	3.68427	4.02895	5.02223	8.15655	4.49803	9.59012	5.97727	2.67387	2.31011	4.85934	4.63225	3.9701	6.03264	0.985926	7.91743	0.419813	C1
TCGA-DD-A73D-01	4.40999	8.58875	5.3213	0.0415507	6.5144	4.95267	8.06394	9.31235	0.763834	4.93396	5.10828	1.71531	8.54366	5.14136	10.5163	7.37885	3.27476	0.0718209	8.10418	4.7628	3.29316	6.92607	0	5.14338	0.954013	C1
TCGA-K7-A5RF-01	7.62027	8.64588	4.00619	0.136487	5.95011	11.626	8.5646	8.5288	0.520124	4.59577	5.15079	3.51064	8.62309	3.24824	9.29617	8.31731	4.04688	4.60447	5.71243	4.44486	3.61411	6.64801	0.129238	2.96768	0.863521	C1
TCGA-DD-AACT-01	7.4973	10.3015	5.30882	0.553662	4.99638	5.90742	8.7446	9.46583	0.824924	4.51436	6.42313	2.83024	7.97039	3.1935	10.5225	7.234	4.14553	0.19817	5.0993	5.10557	3.80862	5.86507	0.147271	7.06558	0.561182	C1
TCGA-DD-A73B-01	9.21853	9.67763	4.41368	0.0594952	4.52931	2.00593	9.80568	9.57204	2.27378	6.2188	5.64672	1.61086	8.36739	4.06838	9.44663	8.11438	4.89556	5.30412	6.20007	5.11717	3.69382	6.53174	0.247875	2.15228	0.577519	C1
TCGA-DD-A4NO-01	6.93401	9.89089	5.47998	0.404051	5.80164	4.06119	9.24925	9.37989	0.940246	5.11376	5.78382	4.54119	9.1005	4.72124	10.2194	7.39285	3.55892	2.82144	6.36929	4.8656	2.87676	6.74586	0.789867	9.23285	0.8265	C1
TCGA-2Y-A9H8-01	7.37986	9.12831	3.97433	0.20393	4.65742	1.31479	10.892	9.44049	1.68812	4.51998	4.82101	3.66666	7.23887	5.94115	9.26931	7.55495	4.13172	4.3846	4.61635	5.47519	2.9287	6.26328	0.0292564	7.93702	0.670642	C1
TCGA-DD-A3A8-01	6.19635	9.04767	5.43093	2.31953	5.56818	3.65928	9.18107	9.54915	0.831185	4.67788	5.77116	2.3098	8.6177	3.64514	10.5725	7.89725	3.16429	0.0679907	7.81542	5.3214	3.10299	6.56041	0.10872	1.20033	1.40596	C1
TCGA-RC-A7SF-01	8.12633	8.73649	5.74109	0.657931	4.38159	2.67459	10.9072	9.53177	1.87974	4.4279	5.43765	2.5834	8.49107	4.72343	12.2541	6.68478	4.33114	1.3673	3.80534	4.30545	4.06107	6.35873	0.192025	8.1516	0.620328	C1
TCGA-HP-A5N0-01	6.64534	9.36909	4.12117	0.18268	5.99511	8.8896	8.58595	8.81572	0.568102	4.55446	5.91702	3.38685	8.45422	5.51116	10.2514	8.14764	4.21996	2.92021	4.36773	4.62507	3.72623	6.43892	0.568654	5.86591	0.934761	C1
TCGA-DD-A73E-01	8.28692	9.73223	4.98023	1.97926	6.65658	8.55658	10.0667	8.59244	1.69648	4.87097	6.39288	2.1674	8.20416	6.28098	10.3838	7.98485	3.53331	0.352457	8.19289	6.07014	4.39397	6.77492	0.0368845	3.57749	2.65005	C1
TCGA-G3-A5SL-01	8.01564	9.1928	6.47951	2.16961	5.57647	4.78169	9.50872	9.10447	0.861559	4.85069	6.95579	2.91075	8.76475	5.37776	10.9665	8.39857	4.24513	0.0205888	7.71346	5.37627	3.41013	6.43954	0.188886	2.20453	0.628594	C1
TCGA-2Y-A9H6-01	6.78935	9.51638	4.36973	1.10597	4.92076	0.390575	10.2337	9.8541	1.69004	4.43265	4.59367	4.16667	8.83127	5.24294	10.0793	7.14387	3.70871	4.209	3.18346	4.86451	3.21871	5.9481	0.155973	7.99787	0.82097	C1
TCGA-WX-AA47-01	7.16074	8.98103	3.9758	1.66098	4.16998	6.17537	8.64428	8.8353	0.631752	5.09777	4.05652	3.30881	10.1962	3.69852	10.9341	6.57355	1.49021	0.87923	0.626576	5.45832	3.85952	7.69183	0.0392762	7.04609	0.119273	C1
TCGA-MR-A520-01	7.40596	8.97399	3.94818	1.04184	4.17459	8.95259	7.16252	8.69023	0.739883	5.03427	7.48059	2.43422	9.44259	3.50249	9.41264	7.59857	3.13769	4.65002	6.878	4.5226	3.98655	7.24403	0.0835289	7.61086	0.566457	C1
TCGA-DD-A3A1-01	7.37839	9.30041	4.78276	4.04673	5.24461	6.55573	10.6648	9.68339	1.06773	5.45546	7.18333	4.70461	7.4655	5.46758	10.7883	7.20818	1.80315	2.41126	3.88092	4.34637	4.30753	7.03726	0.145087	7.31088	0.0773337	C1
TCGA-DD-AADF-01	9.03274	10.3318	4.2043	0.238608	4.42592	1.84417	8.97994	10.2331	1.46248	4.95054	5.69173	2.03663	8.30426	4.36405	10.4128	6.48285	2.28161	3.08292	3.77348	3.82684	2.85237	6.86321	0.192433	5.01697	0.172893	C1
TCGA-G3-A7M7-01	8.21963	9.36207	5.7775	0.607972	4.01354	6.98352	10.0896	9.07978	0.75862	5.14554	4.60881	1.6527	8.62538	4.27092	11.9347	6.48359	3.53056	3.64472	4.06321	4.96809	3.60177	6.77973	0.212139	7.0422	0.20738	C1
TCGA-DD-AADQ-01	6.54969	10.8483	5.71877	0.34516	4.90857	11.2887	9.85023	8.66148	0.880935	4.43941	4.26224	2.11869	8.10291	3.78669	10.9804	6.92174	2.36474	0.263409	3.33742	4.90176	3.40256	6.35617	0	6.84862	0.200984	C1
TCGA-DD-AAVX-01	4.43233	9.2233	5.4859	0.261004	5.96686	11.4706	10.5399	8.64537	0.517265	4.83031	5.98048	2.40745	8.6613	4.4659	10.6747	8.16092	3.99598	0.206601	6.34775	5.50885	2.95504	6.51241	0.0443479	1.93206	0.619354	C1
TCGA-MI-A75E-01	6.65595	9.29335	4.43813	1.04988	5.16537	6.48456	9.21308	9.76072	0.985516	4.97209	5.43792	3.41133	8.91114	5.48419	10.2502	7.47539	3.84832	3.22781	5.17528	4.65523	3.41739	6.44308	0.168834	8.46834	0.556594	C1
TCGA-DD-A11B-01	6.81483	8.94154	4.68655	0.0635573	5.87653	2.55628	7.6767	8.58224	1.4428	5.75489	5.27105	1.60821	8.01719	5.27123	9.41569	8.56132	4.89483	4.51127	7.24852	5.13307	3.05668	7.03987	0.790133	7.41286	1.21643	C1
TCGA-LG-A6GG-01	6.93151	10.5965	4.42063	2.00357	6.41274	3.78609	9.50645	9.29148	1.47849	5.12888	5.28615	1.75398	7.04547	5.92844	9.43443	8.06314	5.36406	3.00713	6.41706	4.80834	3.45072	7.12811	0.437877	7.1284	0.238733	C1
TCGA-DD-A39V-01	6.34525	9.52281	5.05085	2.31885	4.85722	3.50208	11.86	10.8463	0.669567	5.02812	4.27502	3.13046	8.34771	2.21167	12.3901	6.8283	0.567801	0.0446659	5.85072	4.47667	3.08168	5.87887	0	4.71873	0.063223	C1
TCGA-ZP-A9CY-01	6.66041	9.30104	4.15151	0.10872	5.38801	8.2638	8.07556	8.70376	0.9392	5.10291	5.65217	2.74089	8.81705	4.07803	9.28314	8.09246	4.42979	3.9969	5.39306	4.57558	3.50403	6.54343	0.509332	8.02501	0.935809	C1
TCGA-NI-A8LF-01	5.5802	8.56958	4.89594	0.829214	5.1396	7.88235	10.1135	9.05997	1.09192	4.78985	6.59102	3.34941	8.94083	4.68442	8.89445	8.34892	4.24485	0.92337	6.83544	5.39223	3.69621	6.20647	0	2.05022	0.8887	C1
TCGA-DD-AAE2-01	8.08063	9.90952	4.36957	0.164013	5.305	11.0567	8.16247	9.04358	1.60618	3.97954	6.47787	3.16126	8.61822	5.38565	10.0087	8.34438	5.18207	4.70044	5.27368	5.88859	4.1682	5.65695	0.206035	7.5179	1.37001	C1
TCGA-KR-A7K8-01	7.16914	8.9371	4.31702	0.356728	5.47594	6.41293	10.2501	10.1506	2.11467	4.62815	6.29099	4.12889	8.24406	4.4442	10.4025	6.37047	5.45551	0.0266834	6.40152	4.3787	6.23486	5.9411	0.825476	3.8504	0.615322	C1
TCGA-EP-A12J-01	6.29795	8.62533	5.74543	0.109271	7.04967	3.42141	9.70056	9.28196	1.2977	5.26803	6.23987	1.73255	7.97502	4.01561	10.6009	9.47156	4.43341	0.0772147	8.15803	6.65297	3.45687	6.54914	0.152471	1.65133	0.393203	C1
TCGA-DD-A4NV-01	7.39855	10.7493	4.63534	0.392574	5.33737	8.7486	8.76152	9.54628	1.50759	4.90647	5.73201	2.81332	8.25949	5.78639	9.64652	7.93523	4.0082	4.20004	4.5779	5.01907	5.36132	6.20921	0.278182	7.63164	0.781979	C1
TCGA-BC-A3KF-01	7.21491	8.71604	5.01728	0.376917	4.18577	8.6159	10.7705	9.27891	1.61983	5.97774	6.25316	3.99232	8.40817	5.24704	9.70631	8.22025	4.58861	4.93754	6.24397	6.01937	3.90091	6.4116	0.113523	6.78876	0.985538	C1
TCGA-G3-A3CK-01	7.33925	10.0639	4.92082	0.967618	5.66339	5.41632	7.4573	8.61513	1.01307	5.27555	6.48874	3.11042	8.79791	3.74493	9.80874	8.52828	3.95277	0.0667525	6.11595	5.1109	3.62491	6.47351	0.0409693	1.80381	0.810137	C1
TCGA-ZS-A9CE-01	6.61313	8.99868	4.01559	0.324015	3.92618	0.0855598	8.52627	9.23473	0.639605	4.20436	5.17971	1.45041	7.39648	3.78109	9.76122	7.06115	3.68276	2.15823	5.75554	4.51069	4.20409	5.74244	1.64478	6.13511	0.589275	C1
TCGA-DD-AADA-01	7.81116	9.78569	4.74721	0.342932	4.86793	0.75715	9.34296	8.28959	0.838124	1.72681	4.30242	4.12973	7.86241	3.11881	11.1008	6.98336	2.81252	0.700425	2.47501	4.42123	3.19144	5.87966	0.0271646	8.40819	0.391367	C1
TCGA-G3-A25X-01	7.61324	10.8083	5.5195	2.42508	4.94994	3.90629	11.2613	9.21253	1.78963	5.26461	5.595	6.17325	8.5582	5.77222	11.9283	5.41587	1.07767	0.059047	5.43736	4.90451	3.59421	6.79033	0.0715191	4.54297	0.574706	C1
TCGA-2Y-A9H5-01	7.20885	9.12009	5.00319	0.529548	5.28958	4.80438	10.5404	8.53973	1.42765	4.71112	5.95425	3.37634	8.73563	4.67285	10.8231	7.98852	4.524	1.0854	4.80897	5.56401	4.05874	5.76514	0.0908459	8.8338	0.830308	C1
TCGA-G3-A3CG-01	7.97419	10.6531	5.11189	0.883395	5.26348	3.35751	8.15536	8.57545	0.870291	4.77308	4.29679	2.59349	9.2899	5.78971	9.78043	7.52624	4.97529	2.15313	4.93695	5.11393	4.1633	6.59409	0.0990824	9.43404	0.511499	C1
TCGA-ED-A4XI-01	6.9599	8.86919	4.35116	0.40239	5.65829	8.18463	8.75586	8.51327	0.981246	4.37743	6.15144	3.77106	8.51586	4.17827	9.57888	8.13098	4.56669	5.20109	5.13986	5.11091	3.35525	6.5506	0.136292	7.10737	0.788362	C1
TCGA-2Y-A9GT-01	7.80773	10.0808	4.21394	0.0849901	5.87246	7.65739	7.19246	8.71623	1.56851	4.40947	5.4412	2.93538	9.24439	4.75056	8.97498	8.3494	4.93397	5.16791	5.315	4.6516	3.13837	5.68403	0.0691852	6.84814	0.427794	C1
TCGA-DD-A1EB-01	7.45131	10.2272	4.6207	0.0514983	5.09114	4.75903	8.87375	9.1484	0.966335	4.95572	6.38485	2.52476	8.30214	4.78811	8.95475	8.67884	4.11064	2.60774	6.70533	5.3725	4.1699	7.14552	1.10652	6.25676	0.785359	C1
TCGA-DD-AACE-01	7.91675	8.88201	4.37712	0.89291	4.84199	5.76784	8.13625	9.49859	1.09957	4.85856	6.35431	2.72824	7.31807	6.22968	9.82014	7.75935	3.3913	0.196658	6.56789	3.80294	5.15442	6.53348	0	5.53336	0.379097	C1
TCGA-2Y-A9H9-01	7.20723	9.29868	4.57585	0.656653	5.05185	1.82521	8.04159	9.84483	1.76305	5.08686	6.06202	2.32887	9.68806	4.12039	9.74677	7.31602	3.47466	5.40182	5.80639	4.56202	3.1628	7.0004	0.194226	6.28737	0.536099	C1
TCGA-CC-5262-01	7.81207	8.89143	4.38805	2.36028	5.04755	5.45911	9.87094	9.75344	1.76861	5.18717	6.28075	5.57943	8.80459	6.23278	11.3128	7.02858	4.51605	1.25521	5.46455	5.66771	4.20277	7.02873	0.0274006	8.27989	0.564658	C1
TCGA-G3-AAV2-01	5.77765	9.32504	4.97406	0.105475	5.60409	2.15649	10.0538	9.26923	1.09969	4.42524	5.5725	2.00501	8.79689	2.4379	10.6252	7.62238	3.13713	0.0678877	6.17616	5.29804	3.20833	6.16851	0.0279148	6.3482	1.68337	C1
TCGA-UB-A7ME-01	6.87831	9.23915	5.08124	0.135724	4.4811	5.28163	10.7667	9.15351	2.06096	4.01922	7.13223	4.14018	7.4816	5.35346	11.2568	7.32287	3.99898	0.73166	5.91232	4.84287	3.9165	6.10975	1.25098	7.63094	0.508726	C1
TCGA-DD-A11A-01	7.45099	9.25822	5.01759	1.24123	6.33119	5.60389	10.6744	9.01478	2.01538	5.78962	8.00715	3.35972	7.23294	5.83855	10.0069	8.11051	5.01548	5.9502	5.59079	5.58356	3.76435	7.82923	1.54786	4.05744	0.487815	C1
TCGA-DD-AAEK-01	6.50155	8.73301	5.09771	0.645973	6.43182	6.8287	8.81693	9.46256	1.94062	5.12139	7.24767	3.46057	8.37938	4.48507	10.7017	9.31732	4.86808	0.77051	6.58436	5.46288	3.39838	6.52397	0.392048	6.23483	0.981964	C1
TCGA-EP-A2KB-01	4.63014	8.25924	4.70612	0.46172	5.67557	8.69689	8.88525	9.38022	1.67509	5.34529	6.30497	3.17099	7.79228	4.0531	11.3364	8.31009	4.81177	1.3906	5.84106	5.16518	3.02788	6.60069	0.0390023	7.80703	0.317347	C1
TCGA-G3-A5SM-01	5.19397	9.39921	4.21035	1.01197	4.94073	8.54659	9.21842	8.72911	1.25981	5.23631	5.30672	3.53979	8.58111	4.0193	9.34976	7.82407	4.14244	3.19631	5.37047	4.75731	4.1475	6.83192	0.112053	3.89653	0.769034	C1
TCGA-DD-AAEB-01	5.04114	8.0018	4.07634	0.705742	4.1022	10.0539	10.0572	9.36457	0.470827	4.23062	5.15469	2.47669	8.41578	2.60595	10.9286	6.64397	0.0845751	0.0327544	6.35697	4.36814	3.30963	5.66087	0.0397492	1.18574	0.0914354	C1
TCGA-BC-A5W4-01	6.68195	9.37927	4.02493	0	5.71416	9.23305	11.4864	9.03684	0.919519	4.29423	7.28761	1.13053	8.27414	3.56348	10.435	6.70725	2.01739	0.05215	6.6603	4.34912	4.43956	6.85748	0.956314	0.606668	0.166536	C1
TCGA-BD-A3ER-01	7.49719	9.76946	4.92703	1.46803	5.41661	7.46686	9.63459	8.81416	0.890987	4.42431	5.93849	4.34442	8.57698	5.11538	10.175	7.20222	4.74095	2.39303	4.60428	5.41681	3.97132	6.58787	0.116523	8.57913	0.496173	C1
TCGA-ZP-A9CV-01	7.43263	10.4516	5.41122	0.10808	6.31756	9.0376	8.71585	8.39973	1.27203	4.53062	5.23293	2.84198	8.34258	4.59881	9.95087	7.95024	4.96141	3.40148	6.6095	6.31608	3.77067	6.34732	0.234301	10.2849	0.680158	C1
TCGA-DD-AADY-01	6.96811	11.2781	5.41136	0.246418	6.73148	1.18744	8.60236	9.40363	1.57871	3.4173	6.24939	4.09008	8.65519	7.38268	10.6168	8.04513	5.72755	3.95862	5.73711	5.12969	3.64829	6.39996	0.508125	6.46858	0.681957	C1
TCGA-G3-A3CI-01	7.36191	9.10787	3.20029	1.35647	4.28313	9.92543	8.19052	8.65476	0.634867	4.57571	7.10541	3.76976	9.4078	4.5729	9.75384	7.08074	2.82378	3.14792	6.45633	4.37562	3.90285	6.76652	0.303161	7.1474	0.614582	C1
TCGA-FV-A496-01	3.72638	9.71754	4.52512	0.14187	6.03975	5.33975	8.09938	8.06581	0.904874	3.93023	7.48329	2.91279	6.42188	4.64482	10.5034	7.45219	4.25056	0.839069	4.32127	4.8483	4.06417	6.42692	0.237474	7.44806	0.355455	C1
TCGA-XR-A8TE-01	7.99063	9.97471	4.5448	4.75124	6.70892	1.63668	11.5596	8.70012	0.791387	3.79756	7.78667	3.99892	9.64771	4.40536	9.9205	8.95029	3.65235	0.137069	6.84648	6.33458	3.97715	6.23043	0.0288633	7.40925	0.589634	C1
TCGA-DD-A3A4-01	5.44009	9.97526	4.57308	1.84685	5.43072	10.7828	5.07474	9.0139	0.694488	4.9613	5.01923	1.20108	10.3658	5.56733	9.55319	8.30761	3.96743	5.99714	3.00736	4.53823	2.67841	5.83673	0.029766	9.28628	0.352403	C1
TCGA-RC-A6M4-01	6.15668	8.9362	5.87636	0.048411	6.4444	9.52314	9.86192	9.22573	1.75845	5.54231	7.22561	1.22252	8.3295	5.21083	11.4751	7.63625	3.9521	0.0744898	7.44087	5.30718	3.02852	6.39864	0.0681148	0.937334	0.56375	C1
TCGA-ED-A7PY-01	5.47245	9.28344	4.59834	0.0297806	5.3284	1.05164	10.9307	9.05477	1.4291	4.26841	4.75003	2.08065	8.80132	4.3539	11.0067	8.0805	2.23388	1.81807	5.86416	4.49742	2.93622	6.76995	0.0420115	6.88836	0.299472	C1
TCGA-DD-A113-01	9.29404	9.4057	5.35592	1.49039	5.62013	2.64146	9.96731	8.65974	2.11709	5.42974	5.33347	4.59631	7.66603	6.17066	10.2464	7.75398	3.73245	3.95817	3.03264	5.58884	3.13249	7.24326	0.0634729	6.43951	0.458981	C1
TCGA-KR-A7K0-01	7.26379	9.67238	4.88963	2.43209	5.71533	8.85247	8.48093	9.73537	1.08734	5.21455	6.16599	4.3072	9.36929	4.14943	10.103	7.35364	4.01003	0.780497	6.54741	5.68905	3.46264	6.59004	0	5.51921	0.551425	C1
TCGA-DD-A4NL-01	7.97026	9.14662	4.01226	0.0343402	5.54886	12.1676	8.37137	8.13625	0.695398	4.23544	6.66519	2.44958	8.59669	3.43814	9.05369	7.38153	4.4752	3.0714	5.18793	4.65291	3.09787	5.89135	0.0324548	7.72356	0.380686	C1
TCGA-DD-A39Z-01	5.98303	10.19	4.69955	0.104174	4.48413	3.0053	10.6061	10.1053	1.15879	5.88669	5.24471	2.30592	8.34061	4.2647	12.4069	7.07657	1.88367	0.253195	3.68874	4.37681	3.57998	6.80012	0	7.61198	0.261557	C1
TCGA-DD-AADG-01	7.06061	9.22361	4.70775	3.0654	5.71538	5.35844	9.05195	9.4854	1.06635	4.86136	5.8308	1.9859	8.30427	4.02718	9.78656	7.99615	3.31609	0.0713419	7.61133	5.77604	4.55528	6.91218	0	1.86382	0.643134	C1
TCGA-DD-AAW1-01	6.21316	9.02249	5.49296	0.0968389	6.70096	5.3581	8.34583	9.21304	0.751047	4.78839	6.05574	1.88907	9.68605	4.81128	10.6279	8.77432	4.10822	0.102327	7.53516	5.30591	2.93496	5.99825	0.0753964	2.16741	0.490473	C1
TCGA-DD-AAC9-01	6.25992	9.27309	4.34397	1.08086	4.52397	15.7648	9.16031	8.72919	0.54011	4.6526	7.04543	3.26931	8.75591	3.98442	9.80561	6.58064	2.95355	3.10749	4.10748	4.48098	2.94577	6.39324	0.10712	5.32477	0.293557	C1
TCGA-G3-A25Z-01	6.11783	9.87124	5.33629	0.468217	5.01388	9.21013	9.2095	8.97778	1.15861	5.65399	7.73522	2.38886	8.43581	4.56236	10.5546	7.40727	2.78344	3.24629	5.4927	4.54284	4.19879	7.78734	0.117229	5.46143	0.260948	C1
TCGA-DD-A4NF-01	7.46799	8.68816	5.80893	6.45297	7.07603	4.29545	7.48754	8.83201	0.610548	5.46534	6.30774	2.30801	9.57057	4.98793	9.49222	7.98701	3.83282	0.050369	7.59845	6.0117	3.68057	6.96811	0.0308461	3.03994	2.37417	C1
TCGA-G3-A25V-01	7.21774	9.45255	4.73562	2.44169	5.57718	9.96845	8.00662	9.21462	0.968524	5.33353	4.8666	4.92072	9.18819	4.6449	10.3857	7.22969	4.39249	2.60029	4.38707	4.9713	3.59976	6.68518	0.0952636	8.15917	0.525738	C1
TCGA-G3-AAV5-01	7.93534	9.74206	5.59771	0.0937708	5.78134	4.33146	9.91546	9.72677	1.66208	5.87503	5.33162	2.24892	9.8045	4.13765	12.2795	8.17451	3.43104	0.163911	4.07515	5.08574	3.83381	7.18304	0.0209637	6.72496	1.06836	C1
TCGA-BD-A2L6-01	8.92505	8.96039	4.01857	0.156941	4.82025	13.2387	9.15263	9.68141	2.08639	5.33261	5.93781	2.50713	8.58823	4.87832	9.99546	7.40734	2.19144	1.28612	6.42936	4.35801	3.78428	6.6233	0.464552	2.10101	0.326792	C1
TCGA-XR-A8TF-01	6.06347	8.30377	4.62973	1.00273	5.54333	8.91962	9.88468	9.56256	1.65776	5.57801	5.07731	2.51206	9.05704	4.71863	10.7977	7.65803	3.995	1.23544	6.19447	5.51133	3.04835	6.57236	0.0945306	5.1081	0.212394	C1
TCGA-G3-A7M5-01	7.14239	7.69259	4.4789	0.243067	4.39511	4.1629	9.49326	10.0058	0.821768	4.53855	6.04952	1.55958	8.8413	3.59792	9.93594	6.12284	1.63699	3.16416	6.14299	4.12968	4.41653	6.75087	0.333397	4.3696	0.0760473	C1
TCGA-WX-AA46-01	7.80908	9.01536	4.46565	0.0848854	5.81045	11.6885	8.84812	8.73934	0.530052	4.8048	4.9955	3.57003	8.32691	4.58019	10.0776	7.89026	3.8429	2.1627	6.4481	4.73774	4.20719	6.42623	0.108428	2.30294	1.00833	C1
TCGA-O8-A75V-01	7.96764	9.47434	6.12488	0.256645	4.36723	5.10735	10.907	9.4038	0.958843	4.81094	6.13584	3.28106	7.954	3.98694	11.4693	6.91393	3.99791	0.738364	5.50228	5.20801	3.02224	6.31524	0.12049	7.63254	0.626712	C1
TCGA-BC-A10S-01	6.74502	8.65508	5.53974	0.104636	5.65897	8.44299	10.8943	9.15594	0.683648	4.9158	4.73351	3.8734	8.67519	3.46897	11.4911	7.34649	3.71003	1.71817	5.02346	4.67627	3.43018	6.55153	0.105841	6.04827	0.513896	C1
TCGA-DD-A1ED-01	7.54032	8.93831	4.2086	1.61457	6.17823	11.2764	7.17275	8.36601	0.452377	4.49825	5.15209	2.89521	9.05546	3.32858	9.36382	7.60871	4.03487	0.793822	5.38537	4.54983	2.91112	5.84782	0.115929	5.34171	0.488354	C1
TCGA-CC-A9FS-01	7.23117	9.49338	5.98734	1.12341	6.1279	4.06277	9.93067	9.82186	1.75467	5.40814	4.54591	2.67536	8.87141	4.46721	11.7923	8.10614	4.67153	3.43192	7.82852	5.6002	4.2132	7.11987	0.793328	4.54706	0.482799	C1
TCGA-T1-A6J8-01	6.38683	8.99855	3.87145	0.312063	5.13461	1.90788	9.47851	9.10933	0.884902	5.38153	5.49738	3.48532	6.71225	4.29063	9.56743	7.43603	2.64998	0.357522	6.02327	5.02284	3.68493	8.62202	0.16916	7.10784	0.355285	C1
TCGA-DD-A73G-01	6.56213	9.13029	3.34549	0.341571	1.97723	1.38544	10.4785	10.4927	1.11595	5.43977	4.73684	5.15348	8.1528	5.20012	12.005	5.86479	0.993085	0.491939	2.30351	5.24361	3.69076	7.36216	0.0438965	5.28541	0.0343851	C1
TCGA-KR-A7K7-01	6.4515	9.36271	4.89229	1.0232	3.80805	5.25675	11.5049	9.46288	1.84928	4.49909	6.10561	3.37682	7.6955	3.16563	12.6976	6.22663	2.08841	0.0372243	3.866	5.65248	3.33186	6.52035	0.0451587	7.41277	0.0699077	C1
TCGA-XR-A8TC-01	6.05061	9.49002	5.70615	0.431098	5.30602	4.9165	9.49167	8.5064	2.34296	5.71606	5.67981	2.48981	8.38483	5.66467	10.7186	8.46401	4.91392	3.76264	7.2129	6.00596	3.54045	6.88529	0.0829834	8.82374	1.0011	C1
TCGA-ZS-A9CD-01	7.53531	9.90183	5.85373	0.910348	4.82031	7.40242	10.4461	9.43527	0.660919	4.62501	5.54933	4.04602	9.05092	4.33566	11.429	6.87934	3.73184	1.22402	5.06991	5.23374	3.58869	6.36515	0.148411	8.98821	0.438592	C1
TCGA-2Y-A9GV-01	6.92867	10.4	4.71697	0.417205	4.49963	11.0039	8.72728	8.79098	1.03764	4.59636	6.20557	3.3473	8.51743	2.8457	8.95195	8.20166	3.75574	1.34394	5.32251	4.73154	4.82037	5.07215	0.829769	2.66963	1.17559	C1
TCGA-BC-A10T-01	7.5319	8.64391	5.08043	0.548642	6.29166	9.38046	9.45174	8.82306	2.0523	5.51513	8.03389	3.27661	8.07594	4.6676	10.6847	7.60882	3.64206	6.04613	5.50546	5.3144	3.40119	6.85019	0.714248	3.24288	0.585116	C1
TCGA-DD-AAEI-01	4.73003	8.64708	4.67674	1.6479	5.22909	3.11271	10.0329	9.57658	1.60389	4.87018	6.14342	2.68854	7.65803	5.21383	11.5175	7.23359	4.95178	3.57333	6.25902	5.06723	3.01162	5.6449	0.286705	3.54046	0.297321	C1
TCGA-FV-A2QQ-01	6.2267	8.91712	5.33918	1.48202	5.19376	5.1848	10.7972	9.85712	0.933184	4.65076	5.67045	4.46699	7.91072	4.99299	11.1452	6.5649	3.24056	2.04125	4.54133	5.39251	3.20788	7.0415	0.316245	3.15915	0.532542	C1
TCGA-EP-A2KC-01	6.57124	9.82681	5.86618	2.20152	6.24318	6.52844	10.1296	9.11523	1.52433	4.95685	5.6039	2.41282	8.33646	5.29021	11.6751	7.83247	3.59285	0.100176	5.95396	5.38216	3.36419	6.2332	0.097581	7.3206	0.363821	C1
TCGA-DD-A3A3-01	4.85121	9.79462	5.95688	0.758633	3.53916	4.83619	10.34	9.66536	1.03859	4.6957	5.39016	1.6688	8.15884	2.53471	12.8459	6.56946	2.24864	0.0226151	3.40066	4.40763	3.12502	6.25917	0	7.48543	0.220405	C1
TCGA-G3-AAV3-01	7.53202	10.0732	4.83599	4.48029	5.51293	4.15202	9.16133	9.25319	1.7332	4.92774	6.30005	3.6678	8.33952	4.72243	10.2156	7.71978	2.8526	0.0646213	6.71003	5.47986	3.03135	6.43098	0.0782393	3.58385	2.70292	C1
TCGA-G3-A3CJ-01	6.38147	7.94782	4.56432	0.0247668	5.37022	12.3691	10.041	9.26756	0.43527	5.10258	5.58819	2.66592	7.4494	2.17698	11.2724	6.92798	1.05112	0.0192653	5.56172	4.22862	2.83139	6.23502	0.0234028	0.760629	0.205663	C1
TCGA-DD-A4NP-01	5.36155	8.90274	4.3317	3.49719	5.70414	7.73986	7.89544	8.55994	0.327515	4.96624	5.59493	1.67828	8.78752	2.57771	9.39522	7.42691	2.86129	0.0550759	5.89467	4.38958	3.22659	6.13812	0.03375	1.9047	0.57503	C1
TCGA-5R-AA1D-01	6.4052	9.52694	5.50959	1.09691	5.49228	12.4519	9.06305	8.7299	0.896148	5.30616	5.2178	4.60579	9.26119	4.70782	10.6522	7.65606	2.92138	4.8527	3.27415	5.14391	3.25698	7.2048	0.419179	5.00702	1.67803	C1
TCGA-DD-AAW2-01	6.96682	8.61796	6.17215	0.500093	6.27853	7.86792	10.7731	9.3682	1.28954	4.44229	5.85135	2.05393	8.68546	4.72905	12.1252	7.5154	3.29565	0.254588	6.57295	6.19463	2.92336	6.14703	0.22367	1.72066	0.793442	C1
TCGA-2Y-A9GW-01	7.42087	9.71007	6.0915	0.867921	5.0807	5.21538	10.7531	8.45745	1.38371	4.42296	4.81589	4.45555	7.88511	5.58213	11.7339	6.9069	2.75242	1.2557	6.31936	5.72439	3.3523	6.02784	0.176157	8.41103	0.700675	C1
TCGA-DD-A116-01	6.98149	7.87647	5.37819	4.33671	5.16829	8.11042	10.7755	9.47722	1.32988	5.86076	6.06262	2.39109	9.96093	4.2103	11.4493	7.67465	2.77251	0.102488	7.92322	5.29531	3.65642	6.92473	0.302015	3.55111	0.601646	C1
TCGA-G3-AAUZ-01	8.21993	8.25824	4.34773	0.419025	4.4542	8.64292	9.21988	9.69991	1.66926	5.13382	4.95275	3.18543	9.17001	4.45095	11.6201	6.117	1.36866	2.70625	3.41365	3.49788	2.99917	6.25036	0.252157	2.23237	0.162581	C1
TCGA-DD-AAD2-01	6.82665	9.92542	5.57006	0.276848	4.99122	4.67852	9.77664	8.77276	1.76175	4.7688	5.5859	3.76056	8.5639	5.52288	11.268	7.15265	4.41779	3.804	4.7002	5.39073	3.42356	6.88343	0.251832	7.77584	0.730674	C1
TCGA-DD-AADR-01	6.1087	8.90904	5.70244	1.59285	4.92913	8.17201	10.0233	9.31535	2.33914	5.2261	6.498	3.35152	8.19482	5.17848	10.9239	7.52949	3.27244	3.27879	5.84719	4.61934	3.30773	7.15221	0.162892	5.58986	0.269398	C1
TCGA-DD-AAVU-01	3.36755	9.42245	5.65983	0.865276	4.64361	2.25517	9.62148	10.2481	1.27884	5.30878	4.67087	4.21232	7.74532	5.27387	12.6894	6.92764	2.39135	0.495805	6.1809	4.00376	3.23705	7.13174	0.310585	5.28626	0.0809371	C1
TCGA-DD-AADP-01	5.64613	10.0251	5.10084	0.231485	5.59326	5.85376	9.35082	9.38116	1.81102	4.93702	5.8338	2.55695	8.40096	5.53083	11.5063	7.55717	5.22286	4.77991	5.19763	4.95392	2.7661	6.50836	0.807706	7.72109	0.782241	C1
TCGA-2Y-A9H4-01	7.4808	8.43219	4.8598	0.909044	5.06205	6.14185	9.967	9.36997	1.66379	4.77246	5.9335	3.51789	8.09661	4.97901	10.4127	5.24356	1.74493	4.62417	5.77255	4.09391	4.30447	6.85296	0.175737	2.19358	0.822642	C1
TCGA-EP-A26S-01	7.53446	9.37455	5.12258	0.52804	6.92063	3.39899	9.08381	9.36291	1.16882	5.01138	6.13844	2.69881	7.85168	3.62982	9.99802	8.63833	4.35749	0.334321	7.24075	6.31818	4.05909	6.66373	0.0705151	3.57906	1.05797	C1
TCGA-ED-A7XO-01	7.63812	9.67404	4.23934	0.0700199	4.26083	10.4875	10.1028	10.4828	2.51684	4.63785	5.49964	3.40884	8.51263	4.63635	10.4907	6.80036	3.30735	4.46349	6.08576	4.56387	3.47964	6.10182	0.729078	3.60772	0.682638	C1
TCGA-DD-AAVP-01	7.21435	9.99502	4.87377	3.9931	4.81645	5.57672	7.88373	9.3454	0.924011	5.32826	5.53707	2.1911	8.932	4.38404	10.2909	7.31295	1.94437	0.0416403	7.56672	5.49491	3.81602	7.69625	0.321195	4.76049	1.0009	C1
TCGA-MI-A75C-01	7.43816	8.90519	5.46692	1.8657	5.31846	2.60218	10.493	8.62829	1.60384	4.65699	5.64474	5.28238	8.5344	3.93579	12.3018	7.23791	3.57948	0.552715	3.75485	5.51661	3.5142	6.70905	0.051915	7.16239	0.210805	C1
TCGA-DD-A39W-01	6.1115	9.52016	4.32858	5.83674	6.52445	6.46678	9.96334	8.93694	1.3603	4.94318	8.07089	2.20837	7.80921	3.72484	10.0822	9.2524	3.6857	0.406735	7.66376	6.44376	2.99512	7.02657	0.143083	5.35521	0.751694	C1
TCGA-DD-AAVY-01	6.74966	9.57972	5.35236	0.663152	6.15324	2.52994	9.19901	9.68747	0.728155	4.34953	5.96971	1.60153	7.6056	5.43459	11.3001	7.61396	3.5576	0.454888	7.08598	6.38403	3.45329	6.17961	0.0532193	1.70186	0.555237	C1
TCGA-5C-AAPD-01	7.81466	9.81746	4.42272	0.210217	4.61292	6.41483	11.52	9.73724	1.74701	3.87145	5.93999	5.68117	8.57922	4.40137	10.4372	6.67764	3.52388	0.760583	4.92905	4.96411	3.52718	6.64127	0.315511	5.46542	0.353439	C1
TCGA-DD-AAEH-01	5.49177	8.97566	4.74249	0.0897555	5.87724	3.27315	9.10977	9.07774	1.09503	4.73029	4.93988	3.14574	9.23374	4.66022	10.6051	7.18839	2.23314	3.62791	6.04907	4.94417	2.64047	6.46484	0.0951873	4.50095	0.632493	C1
TCGA-UB-AA0V-01	6.88071	9.096	4.64422	0.074003	5.88862	11.0241	7.91009	8.20741	1.03012	5.05759	5.37567	3.43045	8.80882	4.57745	9.46327	7.93241	4.09907	2.04047	5.60987	4.88954	4.60924	6.5163	0.200546	3.05245	1.40782	C1
TCGA-DD-A118-01	6.8709	10.8072	5.39996	1.19382	5.01094	0.8252	9.72737	8.66198	1.46396	5.30089	4.68042	3.09841	8.79224	5.87444	10.4615	7.82494	5.42092	0.664065	3.09294	6.95789	3.76924	8.0882	0.0654015	4.97494	0.532624	C2
TCGA-DD-A1EF-01	6.11583	9.38112	5.90693	0.990073	5.57833	2.41441	8.95148	9.57045	2.29012	4.57164	5.89307	3.70944	7.5798	5.25656	11.6289	8.06976	5.06003	0.789422	6.43667	7.76287	3.68855	6.54582	0.308665	8.64498	0.758555	C2
TCGA-WJ-A86L-01	9.59541	9.43187	3.66467	2.89263	5.25988	1.36473	9.76863	10.2893	2.4456	4.47774	6.31785	3.39119	7.70983	6.47275	9.86568	8.14773	4.11358	0.178466	5.82391	5.04799	4.45094	5.77164	0.341398	7.5689	0.807682	C2
TCGA-CC-5263-01	7.81118	11.0751	5.25079	2.1171	5.69496	3.457	10.0769	8.99702	3.70346	5.15931	7.00911	5.62743	7.82239	6.40564	10.6939	8.32682	5.17594	0.0676316	5.16339	6.63263	3.81714	6.65707	0.30281	6.92171	1.13775	C2
TCGA-DD-AAE6-01	3.7052	8.83848	3.62761	0.0196643	3.97876	5.86903	10.5954	8.37108	2.52296	5.0671	5.3508	2.08325	6.33155	5.06462	10.5919	7.12728	3.71786	4.17161	4.08638	5.58389	2.99452	6.10357	0.0277803	6.80574	0.839418	C2
TCGA-DD-A1EL-01	7.81565	10.3248	5.62878	4.32788	6.20917	3.32754	9.35917	9.11952	2.82039	5.6772	7.09454	5.72938	8.80017	5.75955	11.3916	8.00496	3.90089	0.10355	8.18783	6.5964	4.31493	7.94357	0.730784	7.95638	0.313035	C2
TCGA-G3-A7M6-01	5.74028	9.82948	5.88832	2.92748	6.0776	6.86718	10.0919	8.45384	2.98372	5.4086	5.79016	8.56716	7.49127	4.3389	11.5291	7.1356	4.73302	1.55919	7.11276	5.67313	4.16488	6.07719	0.0857673	5.43038	1.03708	C2
TCGA-DD-AACQ-01	8.84429	9.02514	4.04975	1.00137	4.68918	0.20474	9.02001	8.54519	1.43265	3.30248	5.49468	4.20842	8.25809	5.93193	10.4064	6.62403	3.8669	1.53192	4.62434	4.78789	4.91413	6.09505	0.0938183	7.84612	0.274808	C2
TCGA-G3-A25T-01	8.57726	8.74242	5.61209	1.2498	5.58152	8.89035	11.2351	9.22973	2.58582	6.33713	6.25799	3.92138	8.96651	6.54417	12.3224	6.73548	1.90666	0.284346	2.90146	7.65354	4.06173	8.97625	0.0252676	4.4428	0.621037	C2
TCGA-DD-AADB-01	3.8234	10.4969	5.26037	0.688702	5.89788	6.39287	10.0907	8.6608	2.83767	5.47169	6.60224	6.05907	8.35512	5.28964	11.3937	8.0504	6.28933	0.487864	6.20677	6.35442	3.81981	7.06049	0.19253	8.61678	0.271427	C2
TCGA-UB-A7MA-01	8.14877	9.24994	5.08164	0.641332	5.3989	2.85716	10.6399	10.078	3.16052	5.82081	5.4752	4.10662	7.76369	4.49589	11.6042	7.64307	3.50474	0.205876	4.85207	6.04814	3.69605	6.60983	0.128687	4.99625	2.58246	C2
TCGA-DD-AAD0-01	6.99273	9.70379	4.72118	0.0336672	6.2328	2.04878	10.8315	9.6474	2.23719	4.07114	4.94678	1.6927	8.10348	5.20741	10.4054	8.97642	4.33729	0.197422	7.7582	6.70244	4.22882	6.59766	0.181165	0.851713	0.374037	C2
TCGA-BC-4072-01	6.71945	9.93594	6.34935	1.51093	5.80402	5.76487	9.12872	8.67172	3.07598	6.49829	5.20869	4.6169	8.86735	6.03381	11.2181	7.4674	5.0889	1.89381	5.10931	6.01184	3.56676	8.13523	0.475603	7.18699	1.94464	C2
TCGA-UB-A7MD-01	6.96874	9.39755	5.04111	4.02384	5.87838	10.6469	10.3275	9.78293	1.43563	4.43083	5.51423	4.66455	9.27132	5.71642	11.0233	6.8212	4.01554	1.57443	6.48621	5.62151	3.95247	6.72376	0.13677	6.64371	0.803487	C2
TCGA-DD-AACS-01	7.87474	9.12634	5.17405	0.156871	5.54403	1.98345	10.1249	9.31585	2.76384	5.28119	5.31638	4.33047	8.05479	6.92509	10.0728	7.73041	5.66349	2.66086	6.65625	5.15143	3.35909	6.23145	1.80987	8.92538	0.439085	C2
TCGA-DD-AAEE-01	4.12459	8.76566	5.06798	2.98438	4.31945	7.19693	10.7065	10.2284	1.57206	5.25935	5.80894	1.78557	7.88286	4.21006	10.9269	8.255	2.12755	2.23193	6.36447	5.01541	3.15535	6.24484	0.197462	3.95687	0.297526	C2
TCGA-CC-A7IE-01	6.00752	9.70243	5.38276	1.43048	5.9173	4.40855	9.73851	8.85701	3.11241	4.73361	5.74645	5.77843	8.64077	5.90483	12.9083	7.12951	4.99987	0.22656	3.86989	5.87666	3.97281	6.96089	0.0961978	9.59876	0.364138	C2
TCGA-WX-AA44-01	8.46728	9.63002	4.87002	2.75276	5.70097	5.05486	10.1626	9.67642	1.904	4.57206	6.1394	6.54439	7.96277	6.78803	11.1334	7.25011	2.46348	0.24483	5.7228	5.21381	3.76338	5.91461	0.174495	8.75745	0.486987	C2
TCGA-ED-A7XP-01	5.1965	9.91545	5.50648	2.30243	5.66886	15.6652	10.1652	9.50988	1.6531	5.09893	5.67333	3.56621	8.50067	4.4924	11.0467	7.87409	2.75112	2.62688	5.52241	5.45283	3.72259	6.92088	0.154625	7.48328	0.758636	C2
TCGA-BW-A5NQ-01	3.7116	9.7419	5.06554	1.05009	6.06962	11.5539	9.35402	9.36516	3.57877	5.30495	6.97602	3.58958	7.75192	5.20495	10.8494	8.36599	4.40662	0.225679	6.8223	7.06485	4.02167	7.0158	0.201395	7.865	0.729364	C2
TCGA-FV-A3R3-01	6.18957	9.4993	4.74919	0.345275	5.57113	4.90428	8.72365	9.34079	0.867489	4.70272	4.90017	3.97482	8.23524	4.15969	10.1245	7.82877	4.55615	4.66143	5.44609	5.41783	3.46128	7.27027	0.697058	6.74675	0.98997	C2
TCGA-DD-AACL-01	4.09688	10.1241	3.94122	0.511551	4.03888	8.96663	10.6848	8.54255	2.49402	5.32625	6.68924	5.34581	9.03384	4.76557	11.6759	7.10101	3.93046	0.819401	4.45186	5.95425	4.22783	7.12736	0.311702	7.08039	0.516397	C2
TCGA-DD-A4NJ-01	8.86478	9.53276	5.70795	0.327579	5.08041	3.45919	9.75849	8.75797	3.36698	5.19481	5.59281	4.35091	7.8957	6.74464	10.6652	7.71858	4.17111	3.97762	4.75825	5.52683	4.15707	6.13315	0.657919	6.57874	1.26887	C2
TCGA-CC-A5UE-01	5.8571	9.51722	5.92665	2.3918	5.89414	6.98502	10.7612	8.794	2.80755	5.0459	7.68298	5.48439	6.80289	5.71279	11.7914	8.20548	4.12119	0.300132	6.30682	5.0256	4.00796	7.27327	0.606407	8.42534	0.674613	C2
TCGA-CC-A9FW-01	8.28431	9.46374	4.95389	2.15133	4.85157	1.72669	11.381	10.0908	2.29913	5.51431	7.47869	2.64804	7.09082	3.86671	11.3269	8.6525	5.22232	1.47034	5.98113	6.64263	3.94049	6.55642	0.204975	9.16929	0.549446	C2
TCGA-DD-A4NQ-01	7.72365	10.1277	5.17239	3.62259	5.26873	8.37026	9.29751	7.8825	2.69548	6.28333	6.84958	5.24311	8.71998	6.52635	10.4171	7.68254	5.22913	0.76475	5.87591	6.19828	3.99981	7.39412	0.104388	7.53302	0.554519	C2
TCGA-RC-A7SH-01	7.37311	8.34731	5.06627	0.788296	4.40705	1.30816	11.2787	9.47385	3.17271	5.15854	5.65475	4.87828	7.952	5.21568	11.4232	8.0048	2.43126	0.236645	3.17491	5.63973	4.64609	5.68158	0	9.14492	0.276937	C2
TCGA-G3-AAV1-01	5.78545	9.27348	5.57542	4.41204	6.12361	6.94194	9.58272	8.90647	1.93225	5.3011	6.95875	2.81423	9.294	5.01513	11.1791	8.95583	4.00923	1.95418	7.48543	5.97324	3.35521	6.97435	0.087908	2.15217	0.637769	C2
TCGA-DD-AA3A-01	8.85269	10.8922	5.43957	2.59006	6.61872	6.77341	11.4831	10.0772	3.67164	4.93357	5.56371	6.96525	7.66518	5.55178	11.7024	6.96501	2.77619	0.609403	1.46461	7.06559	4.72807	8.03052	0.173622	3.97972	0.104181	C2
TCGA-2Y-A9HA-01	4.68437	9.38308	5.30845	3.09572	6.24025	9.42847	10.0868	9.67088	2.25569	5.90793	6.24739	3.6819	7.26252	5.65793	10.8529	8.79785	4.81081	0.109724	8.00721	6.93921	4.19213	6.87277	0.111177	6.13905	0.722863	C2
TCGA-MR-A8JO-01	7.68682	10.3488	6.4865	2.49991	5.68475	8.00613	10.0535	8.97394	1.37253	6.1661	4.33056	4.72612	10.0022	4.89844	12.5296	7.82938	2.23301	2.04241	2.87731	5.80508	3.89139	7.76761	0.268231	4.96508	1.5544	C2
TCGA-5R-AA1C-01	7.92332	9.65469	5.62045	3.71855	5.68701	2.58316	8.60057	9.39986	1.6429	5.24263	5.48503	1.91173	8.32402	6.19343	10.2746	8.45884	3.77393	0.15449	8.17502	5.86708	3.3941	7.54689	0.0646528	2.19381	1.28175	C2
TCGA-DD-A4NH-01	8.97254	10.5796	5.07254	1.83938	6.09079	2.35261	9.81742	9.08747	2.79619	5.72631	5.63866	6.20141	9.22263	6.3796	9.92796	8.00401	3.61385	0.521524	6.1119	6.30014	4.29628	6.73308	0.0314984	8.31322	0.534126	C2
TCGA-BC-A10R-01	5.85446	9.17845	5.14181	0.44005	5.87338	4.96018	9.28564	10.1417	0.978076	4.99313	4.59701	5.8543	9.47273	6.51441	9.67237	7.49094	6.27809	1.91782	3.9645	5.54906	3.59941	7.24053	0.655322	7.05593	0.561793	C2
TCGA-ED-A459-01	7.34931	9.83513	5.32902	1.52481	4.86425	7.1158	10.4773	8.28557	1.65044	4.97238	5.64236	6.19869	9.02317	5.27307	10.412	7.13287	5.51395	0.162723	4.48906	5.30832	4.10231	6.1765	0.284363	1.53981	0.360084	C2
TCGA-CC-A7IK-01	5.20749	9.99165	5.78087	4.23958	6.7492	7.41867	8.92482	8.9709	2.67981	5.43182	7.42229	5.29599	6.97997	4.1195	11.3508	8.56456	3.35081	0.150813	8.97265	6.14673	2.80893	6.82193	0.106485	3.49358	0.578597	C2
TCGA-FV-A4ZQ-01	4.73674	9.96866	5.50865	1.97229	5.41863	8.86839	9.05839	8.70097	2.49869	5.60747	7.07908	7.16462	8.82451	5.34359	11.8263	9.129	4.20226	0.0882192	5.47582	6.131	4.19739	6.36773	0	8.25786	2.25943	C2
TCGA-G3-A25S-01	9.23893	8.99403	4.77529	2.28124	4.65631	5.90716	11.5548	10.1839	1.78347	6.34201	4.77754	6.63243	7.25271	4.96173	10.689	6.91515	1.72968	0.804882	4.487	4.97668	4.68486	7.45486	0.049563	7.72698	0.18452	C2
TCGA-FV-A23B-01	7.27473	9.76552	4.52093	0.533016	6.07073	4.30776	8.91553	9.74773	1.98558	4.87813	6.21555	2.97895	8.1109	5.81018	9.93637	8.50507	5.5786	2.66595	6.58445	5.3797	3.67544	6.59196	0.108589	8.5054	0.687352	C2
TCGA-DD-AADD-01	3.51498	9.31233	5.22685	1.07872	5.52751	8.37722	10.4025	9.36275	3.14308	5.39608	7.53909	2.17615	6.80915	4.63301	11.5256	8.47518	5.57223	0.480416	7.32355	6.82026	3.26094	6.29901	0.0380224	8.08409	0.481452	C2
TCGA-RC-A6M3-01	8.64876	10.9886	5.36872	2.18357	5.69617	9.27173	12.4252	9.00998	2.98445	5.82643	5.753	6.49986	9.48406	5.63943	12.4583	6.23521	3.46069	0.816736	4.30074	6.40376	4.36872	6.9394	0.060853	6.40846	0.770916	C2
TCGA-CC-5260-01	8.14438	9.98198	5.0191	3.26953	6.58233	2.27977	10.5898	9.07519	3.99532	4.27445	6.79603	7.24348	9.12247	6.58977	11.3063	7.76563	3.73852	1.3497	4.12866	7.9762	4.58425	6.23268	0	5.03616	1.71295	C2
TCGA-G3-AAV7-01	8.02185	10.4583	6.27748	1.96956	5.51292	4.11252	9.90763	9.21187	4.15053	5.9731	6.25328	7.22176	8.40973	6.34769	11.0894	7.90252	4.63112	0.0535891	5.821	6.9461	4.13148	4.05426	0.35188	7.87278	1.00461	C2
TCGA-DD-A39Y-01	6.25846	9.5759	5.77901	3.5521	4.39391	4.22376	11.7755	10.0141	2.33224	5.65627	7.33571	6.31285	6.66007	6.65929	12.7753	6.13457	2.05586	0.0448944	3.83622	4.60411	4.88784	6.96655	0.140826	1.70698	0.20176	C2
TCGA-G3-A25Y-01	8.30545	10.4633	5.20436	0.163219	5.73508	2.36525	9.88317	8.81256	2.81137	4.50435	6.38322	4.22948	8.64339	5.35898	10.7266	8.12615	3.91919	1.06468	6.13883	5.79317	3.85322	6.94727	0.102701	7.64117	0.687601	C2
TCGA-DD-A1EG-01	6.82701	9.49128	5.59682	2.01516	5.31115	4.72845	10.4551	9.46148	1.72527	4.7334	6.0859	6.01231	7.17662	5.62488	11.3575	6.58622	3.71672	0.0964378	5.83261	4.50664	3.7274	6.81002	0.0977207	7.44223	0.629613	C2
TCGA-5C-A9VH-01	6.37172	9.66026	5.65348	0.460757	5.39199	3.12796	11.4435	8.93601	1.91911	4.61882	5.5967	3.32942	8.43687	3.83824	11.7592	7.34946	2.97477	1.55949	5.85464	5.80341	3.72564	6.43817	0	8.18287	0.814236	C2
TCGA-BC-A10Q-01	8.1128	9.51158	5.39835	0.589215	5.88315	1.03037	11.7524	9.77597	2.89725	6.05663	5.06754	3.73411	8.39692	7.52278	11.0979	8.04905	3.4813	0.862531	1.44207	8.29956	3.89904	7.84645	0.0718246	4.31121	2.73963	C2
TCGA-CC-5258-01	5.90707	9.03414	5.24744	2.56242	5.50821	3.27492	9.1563	8.40461	2.66379	4.82579	6.70727	6.17513	6.89886	6.04409	12.1689	8.31236	5.50504	2.31284	6.16473	5.53235	3.36127	6.47815	1.35152	10.3784	0.574841	C2
TCGA-G3-A7M9-01	5.67629	10.5096	5.00264	1.03098	5.37752	8.79859	10.3651	9.16432	4.03814	5.68149	6.39036	6.09362	7.74499	4.77644	11.879	7.86626	5.20137	0.543644	5.04109	6.7443	4.93783	7.41675	1.51712	5.66049	0.819182	C2
TCGA-DD-A4NB-01	7.68999	9.62541	5.38468	2.53099	5.66087	7.13592	8.92678	9.14239	1.40026	5.69937	5.80532	4.221	10.2326	4.96572	10.0464	8.09187	4.64914	5.36594	2.81761	5.8995	3.50887	7.28359	0.171332	3.7789	1.96868	C2
TCGA-ED-A66X-01	7.99378	9.43105	5.37504	0.755061	5.03602	2.1656	10.1354	9.01253	2.1656	5.00735	6.58577	4.8733	8.44749	5.1032	11.8803	8.28023	4.13992	0.622044	5.05315	6.26064	3.79164	6.53855	0.177794	9.76622	1.27436	C2
TCGA-DD-A114-01	8.81354	9.91938	4.66561	1.91378	6.00607	5.86432	10.1106	9.79905	3.47843	4.96518	6.95588	7.78863	8.36891	6.07445	10.2743	7.47817	4.84921	1.28053	6.49181	6.4559	4.9288	6.5628	0.199094	6.88835	2.66524	C2
TCGA-XR-A8TG-01	8.81063	10.2868	4.80299	1.96518	6.12942	6.07155	8.60082	8.72535	3.02706	4.98775	5.68576	4.15838	8.9278	5.30006	9.73654	7.78897	3.297	4.2054	6.8835	5.33722	3.51748	6.09505	0.333786	7.80378	0.600185	C2
TCGA-CC-A3MA-01	5.29411	10.2252	6.57825	0.967165	6.10537	7.746	9.56639	8.52166	3.12034	6.15692	6.06338	4.72474	9.01535	6.31493	12.105	7.91056	4.1296	0.316207	2.59672	6.28649	3.71419	7.21538	0.0646938	5.09929	1.57883	C2
TCGA-DD-AADC-01	5.51538	10.1344	6.2226	3.10202	5.68679	8.57987	10.8146	9.55529	3.62886	5.23149	6.83497	3.58453	8.03951	5.57365	11.0851	8.41985	4.37425	0.71677	6.71886	5.12968	3.97791	6.70392	0.176923	6.95629	0.297709	C2
TCGA-DD-AAD1-01	7.36133	9.86044	5.80137	1.55859	6.12742	3.03915	9.86427	8.49509	2.14805	4.50037	7.02005	5.07345	8.34978	5.05663	11.4775	7.64843	5.42256	0.927394	6.29121	5.786	4.45049	6.15884	0.21979	8.16957	1.3089	C2
TCGA-DD-AAVV-01	6.67318	10.9099	5.79454	1.73318	5.132	9.65275	10.6653	8.60438	1.3137	4.67162	6.31067	6.43406	8.64722	3.68794	10.9466	6.72096	4.36866	0.415761	4.30783	5.39436	3.8167	6.64359	0.22784	8.28966	0.849127	C2
TCGA-ED-A8O5-01	4.96884	9.64944	5.11886	0.577366	6.28549	1.82697	10.3844	8.22394	2.22389	4.7456	6.62916	3.06404	7.87507	4.98144	11.504	8.3295	4.9999	1.33249	6.46277	6.37802	3.56633	6.09147	0.0763225	7.63905	0.852706	C2
TCGA-ED-A97K-01	7.7911	10.0586	5.61214	2.62196	6.51476	10.4364	9.2107	8.28319	2.96321	4.92125	7.24431	6.11037	10.3068	5.34568	11.1358	7.95635	4.52789	1.84785	5.13594	6.4362	4.34609	6.40311	0.0665387	5.72441	3.10599	C2
TCGA-2V-A95S-01	6.52965	9.4793	5.52882	3.01991	6.09808	3.63716	9.9553	9.14568	2.13793	4.36166	5.90714	5.54384	8.41117	4.70323	11.3885	6.89296	2.35157	0.307185	4.48262	4.72844	4.10809	6.7803	0.080976	9.41535	0.328172	C2
TCGA-UB-A7MB-01	7.81658	9.33467	4.83065	0.98897	5.69802	3.116	9.48722	9.14707	3.13622	5.72914	6.31659	3.61373	8.26901	6.25843	11.2103	7.61028	4.38568	2.88367	6.22841	6.04843	4.51591	7.23798	0.394401	1.46032	1.33273	C2
TCGA-CC-5264-01	7.90887	10.2381	5.23882	1.0282	4.75213	10.1066	11.2101	8.93441	3.94395	5.84597	7.71005	4.59543	7.43693	6.44969	10.6879	9.2901	5.73972	1.32424	5.55413	6.1358	3.96205	6.11411	0.487105	8.7395	0.79215	C2
TCGA-ED-A66Y-01	7.75937	9.51371	4.99874	0.13888	5.8953	0.262943	9.4906	8.80066	1.98296	3.90813	4.62942	8.17619	6.38378	5.14107	11.0308	7.71397	5.34917	0.195143	4.44755	5.86049	4.0404	6.1735	0.206858	8.07711	0.407853	C2
TCGA-BC-A8YO-01	7.7145	10.2596	5.26953	2.56132	6.29388	4.0911	9.97686	8.42612	3.69033	7.39342	5.98603	4.23282	8.05163	6.19889	9.97447	8.90586	5.14931	0.642224	5.90451	5.90766	3.86584	6.67594	0.194964	5.77179	1.1443	C2
TCGA-DD-A4NR-01	7.94317	9.45638	4.38146	2.70374	4.94734	5.38451	9.82503	9.31343	2.74734	4.97627	5.92881	5.63935	9.07592	6.11333	10.6102	7.15583	5.19144	2.07826	5.38392	5.8609	4.16077	6.50425	0.251361	8.79377	0.673002	C2
TCGA-CC-A8HU-01	6.89732	8.31131	4.40017	0.16747	4.86397	8.78834	11.3392	10.4233	3.04188	6.34198	5.4183	5.13768	7.67551	4.68025	10.7978	7.76234	4.44464	2.72428	5.94069	6.81148	3.56077	7.18835	0.25843	3.69209	1.16499	C2
TCGA-XR-A8TD-01	9.42956	9.2046	4.41475	0.499666	4.8903	6.9644	8.73631	9.41232	2.36928	4.32881	5.5071	4.34077	9.1971	7.23057	9.96441	7.9834	5.23051	0.442692	6.31613	5.35341	4.18552	7.33843	0.157008	3.61182	0.687407	C2
TCGA-DD-A4ND-01	8.2055	9.42797	4.59103	0.897815	5.41612	7.68191	9.82646	8.82669	2.3977	5.38634	6.07578	4.08248	8.69603	6.13609	10.1614	8.31291	6.35626	4.37909	6.04563	6.2793	3.78459	6.66167	0.294518	8.97485	1.91687	C2
TCGA-ZP-A9D2-01	6.38788	10.4533	5.881	2.79249	6.75573	5.87481	9.703	9.11803	3.3091	5.40498	5.69798	6.14637	8.27271	5.3082	9.96991	7.54178	4.68345	0.430474	6.31429	5.71216	4.98439	6.66421	0.190279	6.77742	0.717826	C2
TCGA-2Y-A9GX-01	7.87559	9.65346	5.10165	2.81396	5.91314	9.63757	9.47011	8.9694	2.01476	5.2856	5.1503	4.5885	9.28966	5.01293	10.1467	8.03268	3.49362	3.49735	6.07388	5.72582	4.0819	6.73283	0.218126	7.01217	1.23091	C2
TCGA-BC-A216-01	8.27877	9.04328	4.78671	0.478742	5.53266	4.85407	9.12673	8.32428	4.12193	4.9965	5.65251	5.40804	8.68919	5.11356	10.5544	7.69436	4.92682	2.20261	3.58659	5.21111	4.17025	6.18303	0.132411	8.58801	0.623247	C2
TCGA-CC-A3MB-01	7.31844	9.72883	5.77411	2.63037	5.6268	6.36123	10.7306	9.58841	3.0342	5.28709	7.29977	5.8501	8.02761	4.42279	11.1841	7.6778	5.47042	0.69401	5.89914	5.77388	4.66416	7.19744	0.0228862	8.1179	0.458925	C2
TCGA-DD-A4NE-01	9.36647	9.28545	5.19871	0.455007	6.32693	2.28519	8.66838	8.48913	2.22703	5.63483	6.37746	4.05378	8.32121	6.40424	9.83612	8.14458	4.34232	1.15281	6.03299	5.63293	5.0992	7.08653	0.205659	5.92052	1.0542	C2
TCGA-RC-A6M6-01	6.89683	10.0842	4.88726	2.98404	4.42049	3.26175	10.8151	9.5221	3.33044	5.20179	4.89605	4.81688	7.9402	5.62938	13.6192	7.20682	4.14292	0.564411	4.7785	5.21554	4.19981	6.96597	0.32748	6.32288	0.540756	C2
TCGA-CC-A5UD-01	6.98038	10.0618	5.85869	2.94108	6.22715	4.68739	11.7155	8.2321	3.8065	5.50295	8.10405	8.50819	8.0815	5.9343	11.5468	7.23047	5.28753	0.230637	7.60899	6.71809	4.12809	7.0225	0.0741235	4.2353	1.11975	C2
TCGA-BC-A10U-01	7.42534	8.85569	4.99757	3.10338	5.85991	3.24044	8.97663	9.57351	1.41021	4.79776	5.92089	4.91464	8.19773	6.4236	10.667	7.89896	3.75034	0.355577	5.08598	5.72269	3.96355	5.79538	0.17572	10.6999	1.28751	C2
TCGA-BC-A10Y-01	9.41692	9.38866	4.81864	0.404572	5.87201	7.04298	10.0915	9.05305	3.68914	4.41555	6.76927	3.09789	8.06751	4.07924	10.0878	7.03176	5.32304	5.55063	5.70681	4.88842	3.06001	5.80379	1.96806	2.71522	0.768506	C2
TCGA-CC-A3M9-01	6.44288	9.71918	4.84644	0.739218	5.17433	5.60291	10.2788	8.96009	4.13531	5.89906	5.37438	8.60961	9.49178	5.48447	11.6876	7.13314	3.10158	0.110406	6.33219	6.20199	5.29184	6.54611	0.255203	6.86639	0.640599	C2
TCGA-BW-A5NP-01	6.38311	10.2827	5.30515	0.118761	6.50304	2.41545	10.2021	8.80833	2.70587	4.70353	5.52529	6.11555	6.53223	5.99241	13.4307	8.52215	4.36484	0.409601	5.70023	5.70134	3.31411	7.29887	0.120122	8.58916	0.450019	C2
TCGA-G3-AAV4-01	5.61398	9.17516	4.93956	3.59761	6.74656	7.84678	8.86323	9.53898	1.1798	5.38102	7.32704	2.52295	8.80894	5.78259	10.2756	8.93978	3.68284	0.112737	8.50877	5.71122	4.85339	6.88665	0	1.82563	1.6954	C2
TCGA-BC-A10W-01	9.2758	9.93836	6.59327	4.82954	6.52159	6.27296	10.2151	7.90006	3.35784	6.14591	6.99014	5.48526	7.95356	6.42256	10.9599	8.07714	4.5313	0.827152	7.21789	5.81227	4.23494	6.83387	0.203339	6.19439	2.01657	C2
TCGA-CC-A8HS-01	7.34991	10.0413	5.25857	0.239189	5.54813	2.44022	10.1502	8.92167	3.28224	4.79198	5.698	4.78151	7.48909	5.63243	10.8413	7.7154	3.79878	1.51191	4.01363	6.49045	4.01599	6.60218	0.702282	6.55018	0.367507	C2
TCGA-DD-A1EE-01	8.58367	9.78581	6.15968	1.14211	7.04639	4.31526	9.26848	8.90391	2.10318	5.45597	6.01884	4.28068	8.26142	6.08956	11.0974	8.16125	4.80048	0.104029	6.19447	6.29369	4.14326	6.33235	0	2.06208	0.985503	C2
TCGA-FV-A3I1-01	6.29697	10.2566	4.98445	2.58136	5.56953	2.01154	10.5919	8.5326	2.16668	4.78226	6.10007	5.61555	7.42577	5.60825	10.7551	7.59334	4.63245	0.631491	5.50012	5.4914	4.12615	6.29813	0.131508	8.91231	0.533134	C2
TCGA-G3-A5SJ-01	7.20289	10.1162	6.13287	2.06784	6.18135	3.31238	11.0087	9.25392	2.44101	4.84409	6.10656	5.65515	9.14585	5.0736	11.8986	5.78248	4.12989	0.388548	4.82401	5.08289	3.48269	6.62329	0.0624456	3.29136	1.07391	C2
TCGA-BC-A3KG-01	8.99075	10.0494	4.7529	0.974106	5.12236	3.21231	9.30572	9.73944	4.27475	5.13069	6.41051	3.11876	7.90652	4.95217	9.396	8.23964	4.82867	1.85625	4.07333	6.12481	4.42957	7.19584	0.0516297	8.46545	1.02735	C2
TCGA-DD-AAVS-01	7.35454	9.7252	5.39296	0.264237	6.15558	5.52701	10.6413	8.96049	2.38746	4.79661	5.38757	2.65369	8.40427	5.93073	11.194	7.99511	4.34132	3.40459	6.80628	6.07186	3.27769	7.27681	0.197832	7.99402	0.827447	C2
TCGA-FV-A3I0-01	8.7532	9.33377	5.58035	1.74234	5.76341	5.12566	11.2317	9.67009	1.33482	3.11769	4.24648	7.36305	10.55	6.31607	12.0342	6.77105	3.25525	0.507609	2.39484	7.61577	4.24413	6.72493	0	4.8622	1.21625	C2
TCGA-CC-A9FV-01	8.13702	9.12065	5.45034	0.384573	5.81705	1.23549	11.322	9.59838	1.39894	6.87516	5.87125	4.62773	9.5794	5.17966	10.4203	8.1319	3.22052	0.0349682	6.66794	7.32103	4.33279	7.80978	0.162706	4.81319	2.9983	C2
TCGA-BC-A217-01	6.78103	9.88973	4.5861	0.571562	5.68822	5.66171	8.48771	10.0862	3.31025	5.74191	5.33385	4.20685	8.39382	4.42743	10.1633	6.73463	2.35212	2.04045	4.56251	4.55024	4.23968	6.42148	0.85538	4.91907	0.658122	C2
TCGA-DD-AAD5-01	5.59949	9.48304	6.50088	3.7948	5.60862	5.50439	10.9089	8.87291	2.7689	5.22393	5.52894	7.30812	8.46301	6.03108	10.8822	6.14833	2.61406	0.148263	5.19929	5.65295	4.66025	7.4633	0.0532773	5.48885	0.141168	C2
TCGA-2Y-A9H0-01	8.29852	10.2109	4.1513	0.593329	4.88779	10.3618	9.12736	8.79389	2.9592	4.97066	6.58821	3.15044	7.68539	4.91875	9.55347	6.88448	4.65657	1.84206	5.57017	5.56176	3.38852	6.85379	0.377978	5.06446	1.7201	C2
TCGA-DD-A1EI-01	5.73293	9.61491	5.73516	2.01997	5.4676	6.80624	10.1411	8.46485	2.93375	5.16542	6.79406	5.70244	8.41506	4.7008	11.4712	8.05138	5.0136	1.37713	5.48032	5.33866	4.27143	6.71815	0.100998	8.01277	1.02176	C2
TCGA-LG-A9QC-01	7.38237	9.10082	5.38427	2.50109	6.41291	1.55077	10.4457	9.49837	1.07127	5.313	6.14671	2.64769	8.61115	4.39717	10.0039	8.5516	4.32954	0	7.6083	5.87921	4.63915	6.59005	0.0747067	5.83309	0.871743	C2
TCGA-GJ-A3OU-01	6.57359	9.90601	5.84536	1.95609	5.76573	7.40588	10.5921	9.14149	1.92051	5.52318	8.32536	5.7167	9.471	6.73197	11.7481	7.85566	4.86503	0.395536	4.49551	5.73311	4.35168	6.55972	0.106677	7.76909	1.45292	C2
TCGA-CC-A7IJ-01	7.66236	9.72026	4.78733	5.38023	6.44314	5.30058	11.6152	7.76041	3.77218	5.18542	6.05099	9.54977	9.66979	8.12156	11.3174	7.25028	3.61533	0.220156	2.41892	6.8977	6.40698	7.14624	0.9126	5.18568	1.1816	C2
TCGA-DD-AACA-01	5.34924	8.43706	5.50845	0.86816	6.32691	7.29554	10.0879	9.46936	2.2232	5.11997	7.3247	2.29968	8.80666	4.66464	11.7773	9.57945	4.29584	0.700569	8.48996	6.35424	3.55047	7.03457	0.0800262	2.75067	1.78626	C2
TCGA-2Y-A9GS-01	6.81393	9.82389	4.67213	3.60155	5.82205	5.01977	10.1408	8.8261	3.41528	4.86062	6.6024	5.30484	7.53811	5.94743	10.5091	7.41159	4.04175	0.695413	6.47106	5.66639	4.37677	6.77066	1.22617	6.63285	0.949631	C2
TCGA-DD-AACW-01	3.02457	9.28321	4.92813	0.0979993	5.7091	6.79279	8.8191	8.22859	2.22289	5.49703	7.23632	2.48263	8.04887	5.08978	11.0617	8.65299	5.23031	2.05203	5.64107	5.40654	2.96889	7.06486	0.151395	8.91107	0.482703	C2
TCGA-FV-A3R2-01	4.53914	9.50133	5.17082	0.579275	5.67368	7.93762	10.1892	9.86733	1.79281	5.6979	6.32466	6.4709	8.22898	6.80996	10.6014	7.5543	3.58662	4.3545	6.81692	5.88077	4.67313	7.24978	0.103889	6.45008	0.825706	C2
TCGA-5C-A9VG-01	5.91956	11.1015	5.22259	0.537646	4.75057	8.81548	9.3788	9.37879	2.75018	5.97542	4.91522	3.14834	8.07608	6.60073	11.83	8.12796	4.38825	3.05763	4.51388	6.91852	3.95453	7.65871	0.153473	9.50075	0.609563	C2
TCGA-ZP-A9CZ-01	7.825	9.18402	4.61902	0.26009	5.38187	2.79242	9.06021	8.84583	2.37238	5.55362	5.84146	4.51859	8.56345	5.72119	9.94436	7.43511	3.31634	4.72484	6.51134	5.42399	3.48478	7.0837	0.413276	7.57532	1.03709	C2
TCGA-DD-A1EJ-01	6.44297	10.3897	4.89514	3.16756	5.72472	4.17986	9.94591	10.0315	3.55959	4.97532	6.96996	4.59184	8.15084	5.25205	10.9356	8.89449	5.51981	0.071094	5.09482	6.08552	3.65484	6.97118	0.119063	8.29577	0.565361	C2
TCGA-DD-AACU-01	6.57796	9.10935	4.94689	0.477716	6.02358	2.87475	10.7835	9.30534	1.73569	4.50274	6.97773	3.15169	8.18659	4.58407	10.6093	8.09136	4.51241	3.51067	8.25041	6.19778	3.51831	6.68838	0.310215	8.53297	0.627466	C2
TCGA-2Y-A9H2-01	7.91475	8.93836	6.05928	1.58849	6.26366	5.99593	11.1936	8.85968	2.86471	5.42834	6.19268	5.73439	8.59662	6.09957	11.4479	7.68034	4.35603	2.8517	3.14791	7.15312	4.72451	7.11832	0.0786594	5.26103	2.39659	C2
TCGA-CC-5261-01	8.85823	10.1379	5.11111	0.766095	5.8686	3.90846	9.02857	8.95837	2.48451	4.62373	6.58494	6.09007	7.82519	6.41786	10.6732	8.27867	5.47049	1.07988	4.9563	5.77438	3.58205	6.07708	1.36492	8.93772	2.0356	C2
TCGA-EP-A3RK-01	6.72243	9.33487	5.57574	3.8237	5.71014	5.44778	10.563	9.51183	2.17946	5.33726	6.13205	5.04927	9.06856	4.05467	10.9	7.04999	3.38988	0.126908	5.12163	5.46468	4.0968	6.93436	0.724662	6.35932	0.675158	C2
TCGA-BC-A112-01	7.10467	9.47061	5.40013	4.89531	6.2126	3.9637	9.89276	9.13739	2.24499	5.83544	5.25391	7.62214	7.94592	5.94868	11.1901	7.47342	4.99595	0.18286	6.7692	6.70377	3.82105	6.03018	0.0334888	5.39225	0.99283	C2
TCGA-DD-AACX-01	5.08897	9.07019	4.89494	1.25746	5.78374	6.45143	8.10955	9.55298	2.22266	5.25157	6.00461	4.11772	9.42073	4.46862	10.7923	8.52262	3.92076	0.104781	6.84234	6.48302	3.86533	7.11626	0	2.23507	0.894191	C2
TCGA-DD-A4NN-01	7.33347	10.0603	4.76715	0.0625294	5.14818	0.492501	10.2602	9.61063	2.48833	4.33051	6.54252	3.38817	6.92801	4.05114	11.1215	7.77531	4.19139	0.234946	5.93756	5.99798	3.90258	6.32566	0.479697	7.54026	0.933486	C2
TCGA-DD-AACZ-01	5.62122	9.94277	6.14431	2.44106	5.61484	4.31683	9.75466	8.82482	3.02749	6.44285	6.41575	6.11039	9.06652	6.53403	11.4072	8.36026	6.97301	0.116955	5.76567	5.96837	4.29206	7.05307	0.43218	10.1099	0.32958	C2
TCGA-DD-AAE0-01	5.348	9.47469	5.42391	0.253314	4.42761	7.16934	9.98962	9.46819	2.73222	4.31109	5.13072	7.68415	7.4553	5.51763	12.395	6.88632	2.38919	0.0574737	4.83209	5.62635	3.78419	6.30728	0.0696215	5.86731	0.659018	C2
TCGA-YA-A8S7-01	6.30871	10.0411	5.49959	4.70794	5.86668	7.94863	10.7312	10.0746	2.67906	5.25877	4.65808	7.87076	9.53346	5.98453	12.1637	6.99681	3.64201	0.291423	6.73157	6.0233	4.39948	6.50433	0.0592086	5.8365	0.782055	C2
TCGA-2Y-A9GY-01	5.43837	10.3377	5.22504	3.10346	5.15899	6.42648	9.64176	8.7217	3.25768	5.94821	5.29008	6.77475	8.63676	5.60177	11.6051	7.19373	2.93007	0	4.90743	4.79171	3.80772	7.16015	0.102164	5.80512	0.263661	C2
TCGA-ED-A8O6-01	5.6854	9.72394	5.69666	2.50905	5.09783	5.95918	9.94322	9.14563	1.92093	4.79097	6.34844	5.58885	7.56677	5.16232	12.9495	7.27905	4.89412	1.39935	4.11922	5.98485	3.75984	6.46038	0.0542459	8.0219	0.635451	C2
TCGA-ZP-A9D4-01	7.96146	8.34818	5.15256	0.0637065	6.37303	2.10099	8.26865	8.82571	1.25459	4.79038	5.71024	1.66817	7.69844	5.49106	10.6393	8.53461	4.97325	0.576013	7.82874	6.76954	3.31912	6.29045	0.0304355	2.72742	0.692324	C2
TCGA-DD-A1EH-01	7.93861	10.3178	4.98589	0.540454	6.17342	0.386896	10.1209	8.83107	2.03236	3.94415	6.48456	4.49718	7.6956	6.07611	10.49	8.88444	5.41843	1.92573	6.06449	6.18828	4.62249	5.89822	0.161687	8.9116	1.71735	C2
TCGA-BC-A10Z-01	9.61389	9.87782	4.86238	3.03337	6.73456	5.09504	8.16655	9.91902	2.38861	5.47104	8.63565	5.91	5.85665	5.66291	9.57519	8.21088	6.58986	5.18367	7.6287	5.56974	4.36933	6.85286	0.936433	6.90653	0.282827	C2
TCGA-ED-A7PX-01	8.28925	10.6908	5.60469	2.3177	5.4279	4.47463	11.1241	9.07868	2.41598	5.30162	7.66076	5.92852	8.05051	6.45746	10.8886	7.48576	5.48338	0.460188	3.69889	7.28442	5.35088	7.64316	0.111912	6.96091	0.974964	C2
TCGA-CC-A8HV-01	5.82751	9.59038	5.0673	1.29119	5.34365	4.04688	11.2265	9.37494	3.45904	5.40305	5.39876	6.87786	7.76629	5.10115	11.7391	7.43716	3.68786	0.355299	3.47785	5.61988	4.59882	6.71111	0.313421	9.70348	0.155319	C2
TCGA-GJ-A9DB-01	8.25542	9.04811	4.48733	2.40031	5.52603	6.91271	9.92508	9.65571	2.19648	5.1271	6.30743	4.25816	8.11205	5.59623	9.82015	7.57597	4.30545	3.747	6.91105	5.19307	4.3687	6.10062	1.53505	6.64668	1.05718	C2
TCGA-MI-A75I-01	7.15505	9.69089	5.5176	2.09306	5.17688	2.52806	9.2705	9.73209	1.67159	5.04549	4.94468	4.43631	7.27992	5.68671	11.4338	7.07823	3.30731	0.976566	5.40832	5.22881	4.68576	7.23292	0.0258969	7.05776	0.897319	C2
TCGA-CC-A5UC-01	5.81423	10.0227	4.30389	1.61813	5.47799	7.27366	9.72379	8.74364	2.78845	5.79086	7.62299	4.70413	8.37529	5.06884	11.2985	8.12297	5.3433	0.794943	4.16243	5.7626	3.87244	6.947	0	7.85464	0.475198	C2
TCGA-DD-AACK-01	6.63895	9.83301	4.55073	4.41043	5.59072	9.70846	8.71015	8.77163	1.62487	5.08323	8.21841	2.895	8.79053	5.58051	10.1851	8.68816	4.80916	2.10007	5.30671	5.93368	4.28971	6.75969	0.0478831	9.63588	0.514143	C2
TCGA-DD-AADL-01	7.75681	8.99692	5.40837	1.38927	5.78257	9.62814	9.4079	9.49666	2.89948	5.86109	7.28227	4.56912	7.78319	5.95843	10.2336	8.26908	4.45154	3.71391	6.70632	5.35889	4.54755	6.89333	0.737018	4.33168	0.844879	C2
TCGA-UB-A7MC-01	6.67968	8.55523	5.2086	2.12493	5.86833	16.1216	10.1864	9.25373	2.95427	5.11815	7.04684	1.69284	9.07739	5.01185	10.7414	8.35022	3.58125	0.241348	7.46526	5.42238	3.41569	6.52262	0.180038	1.40789	0.656726	C2
TCGA-ED-A82E-01	8.84148	9.88378	6.22103	0.724798	6.35266	5.55959	10.1271	9.25813	1.86328	6.12577	6.14906	3.99673	10.2162	6.84911	11.4756	8.48961	4.63662	0.18675	1.26276	7.8854	4.58275	8.54335	0.224185	5.71841	0.512559	C2
TCGA-UB-AA0U-01	7.99069	9.51816	5.33645	0.123017	5.73513	7.39247	9.42453	8.4022	1.96241	5.43131	5.80235	3.57189	7.89356	5.93462	10.1709	8.42846	4.50803	1.74669	5.1	5.61457	4.21334	5.46037	0.973031	7.24821	0.852412	C2
TCGA-CC-A9FU-01	2.48494	10.3638	4.49049	2.27287	5.38805	6.46073	10.5839	9.65442	2.62828	5.50149	5.48399	6.26263	5.16806	6.6812	11.588	8.50393	4.61083	0.154922	5.29068	5.74495	4.1009	6.44627	0.389883	8.0898	0.418418	C2
TCGA-DD-AADW-01	8.66276	10.0853	4.70728	1.07137	5.95609	3.44389	9.4063	9.59842	3.03736	4.30169	7.55986	3.22364	7.96654	6.53257	10.1732	8.04389	4.15462	1.32563	5.82394	6.48252	4.17503	6.7874	0.125283	8.10087	1.01432	C2
TCGA-DD-AACB-01	4.09964	9.64128	5.69869	3.59126	4.44181	4.37598	10.0452	9.59615	1.71822	5.28494	6.24128	5.69553	8.51446	3.88369	12.5959	7.8566	2.43996	0.102391	6.93652	6.01929	3.38508	6.42967	0.0423995	6.43134	0.896517	C2
TCGA-DD-AACP-01	6.83017	9.98189	4.62252	2.30931	5.20771	6.35584	10.1928	9.31206	3.58784	4.88318	6.93881	6.68394	7.97292	5.26622	12.0633	7.8226	3.66919	0.274852	5.54615	5.80681	3.36074	6.67434	0.245714	6.10328	0.676255	C2
TCGA-DD-A4NS-01	7.55819	9.04726	5.28579	1.57265	6.44997	8.07479	10.0448	9.02727	1.4968	4.67418	5.96189	4.96442	8.94289	5.17138	10.4566	8.03498	4.21523	2.34414	6.2387	5.88971	4.22605	6.10361	0.516373	4.93898	2.07671	C2
TCGA-DD-AACH-01	8.44646	9.98794	5.7208	4.15838	6.15527	5.96649	10.1894	8.65973	3.09864	4.58568	6.24691	5.95552	7.73332	6.1059	10.5961	6.96202	3.68877	1.56405	6.48629	5.62783	5.46581	7.17285	0.204073	6.8691	1.11099	C2
TCGA-DD-AACN-01	8.07458	9.68183	5.52085	0.0840297	5.95209	9.24529	9.72757	8.62012	1.46758	4.39735	5.28416	3.98919	8.17643	4.3186	11.8817	8.01216	3.93274	1.19983	6.20433	5.81929	4.58022	6.44295	0.313551	8.0511	0.717572	C2
TCGA-PD-A5DF-01	8.8874	9.97781	5.00205	1.51669	5.18246	3.79588	9.93072	9.6932	2.11482	5.54506	5.9379	3.6782	8.48995	5.52528	10.2025	7.51725	3.65342	0.853909	5.61302	5.39258	4.79893	6.65879	0.2792	6.95129	0.926151	C2
TCGA-CC-A7IG-01	7.06443	9.33999	4.84764	0.565998	3.70971	2.8436	11.2025	10.3922	2.56631	5.31265	5.23969	7.51082	7.90281	4.76427	12.1226	6.53957	2.21541	0.151227	3.96514	5.09383	3.6823	6.74154	0.0709598	7.35283	0.109323	C2
TCGA-4R-AA8I-01	5.568	10.2403	5.00844	1.08471	4.8914	10.1939	9.48216	8.26509	2.41996	5.24314	5.29395	2.92889	9.03201	5.42218	9.72466	8.79917	3.66551	3.71182	6.18812	4.93912	3.54181	5.63564	0.601261	2.82541	1.44891	C2
TCGA-DD-A4NG-01	6.34339	9.29476	6.04526	2.20494	5.46822	4.1133	10.5462	9.72628	1.33724	5.63395	5.47761	3.91857	9.97141	6.30307	11.1777	8.68964	5.29693	0.0944212	6.21686	5.79055	4.64216	6.53678	0.114075	8.10787	0.696869	C2
TCGA-ED-A5KG-01	7.20371	9.65208	5.37835	1.04948	6.34268	2.63823	9.75912	8.31256	3.3085	4.68171	5.7922	5.42253	8.50718	5.7178	10.9024	8.28603	3.96742	1.23393	5.73855	5.97428	4.06787	6.25475	1.53769	8.6471	1.73545	C2
TCGA-CC-A1HT-01	6.87782	9.28207	6.11548	3.9057	6.44705	4.38328	10.7382	9.15646	3.88564	5.76872	5.36688	6.82246	9.47957	6.55185	11.8227	6.44883	3.9451	0.253636	3.64008	6.18515	4.90295	6.42747	0.0907869	5.3358	0.96594	C2
TCGA-DD-AAC8-01	7.33525	10.0231	5.83634	4.38234	5.73085	0.447833	10.3164	9.81761	1.1034	4.47486	7.9484	3.84961	8.38826	4.05927	11.6031	8.22645	2.43826	0.0696242	6.33413	5.77703	3.85365	6.82768	0.028639	5.66253	0.392938	C2
TCGA-BD-A3EP-01	5.75794	9.76066	4.98881	0.713501	5.39731	7.4968	9.9626	9.24466	1.87619	4.07223	5.36866	4.38716	8.15023	4.97312	10.6513	6.92993	3.9178	0.344036	5.50536	5.18386	4.49014	6.1706	0.284995	7.89215	1.08774	C2
TCGA-QA-A7B7-01	9.81586	10.6518	4.06919	0.860284	4.94935	1.86349	8.8047	9.00558	4.56662	4.9018	6.72528	2.24362	7.33578	5.21906	9.05739	7.23649	4.20634	1.5788	4.374	5.76922	5.38334	7.40456	1.34786	7.0147	0.653874	C2
TCGA-DD-A1EA-01	7.0201	9.78319	4.83917	3.10633	6.28584	4.76124	8.7842	8.94153	2.0622	4.80118	7.00733	3.06384	8.57414	4.13439	9.36172	8.87289	4.37936	0.143601	7.19762	5.8373	3.33414	6.19037	0	6.50183	1.13279	C2
TCGA-CC-A3MC-01	8.73311	9.68413	5.23528	2.26413	5.2004	4.9017	9.22945	8.15204	1.94625	5.16603	5.20087	5.38813	7.55756	6.26994	10.6314	7.18663	4.19697	2.60259	5.65425	5.49422	3.3717	7.43214	0.027648	7.11841	0.276781	C2
TCGA-FV-A2QR-01	7.53903	10.3479	4.47133	0.921385	5.49778	2.65511	10.1675	9.78852	1.35147	4.84312	5.77854	2.27531	7.55068	6.04817	9.72967	7.43096	3.59247	0.352226	6.83901	4.6875	5.15254	6.67073	0.352799	6.33913	0.761474	C2
TCGA-K7-AAU7-01	7.791	10.0615	6.06649	3.9235	5.94082	6.24405	10.5496	9.20746	2.82451	5.39084	5.86176	6.06652	9.18793	6.13076	12.113	7.10034	3.42855	0.900564	4.47719	6.37618	4.33475	6.6953	0.0844115	8.01266	1.49117	C2
TCGA-G3-AAV6-01	4.50689	10.1654	4.63292	2.22238	5.71091	2.3884	11.0638	10.3309	2.50383	5.44105	6.11322	4.79442	8.25514	3.90167	12.3128	7.42605	2.12909	0.414591	5.67028	5.72488	3.29931	7.7848	0.190135	6.90444	0.411368	C2
TCGA-CC-A8HT-01	6.02367	10.0109	5.22674	3.25444	5.35613	5.77362	10.6697	9.35491	3.59833	5.48784	5.88207	6.30377	8.24533	5.80055	11.5392	6.57846	3.65154	0.381511	6.10401	6.20014	4.99574	7.24441	0.102522	7.50951	0.406901	C2
TCGA-RG-A7D4-01	3.40771	9.71244	5.40051	1.50388	5.0811	5.11698	10.8021	8.87119	3.01398	4.7903	6.11058	3.85762	8.12476	4.61341	11.7661	7.75236	4.56806	0.0748255	7.02583	6.01904	3.09927	6.88746	0.0308112	7.54837	0.574096	C2
TCGA-DD-AAE9-01	7.60513	10.0046	5.41415	3.95072	4.81932	4.0493	11.6987	9.70679	1.55002	5.62837	5.3278	1.5288	8.89362	3.08091	11.2788	7.71332	2.91964	0	7.60595	5.37274	3.79186	6.71068	0	5.84651	1.02092	C2
TCGA-DD-A4NA-01	7.03937	9.8305	5.24519	2.19737	6.34724	2.19284	9.32332	9.78685	2.36653	5.91465	5.51361	4.97321	9.27364	7.65141	9.59501	8.18837	4.9796	0.204421	1.65769	7.7578	4.94045	7.75885	1.16991	8.18804	0.995646	C2
TCGA-DD-A1EC-01	6.88332	9.8744	5.2819	2.7203	6.09599	7.16576	8.65836	8.8028	2.20454	5.56893	5.999	5.10963	10.8269	5.98423	10.6829	7.99887	4.73603	0.909638	3.35276	6.11239	4.12254	7.17802	0.575887	7.90916	1.27659	C2
TCGA-BC-4073-01	7.52654	10.3824	4.5906	1.89969	5.66642	3.74059	9.09302	8.09057	3.15703	4.87169	7.05523	5.41189	7.86615	7.56369	10.3616	8.5747	6.22751	0.427167	3.92704	5.65818	4.28123	6.97663	0.195482	4.58888	0.670501	C2
TCGA-WQ-A9G7-01	6.5583	8.88259	4.71717	0.90256	4.52566	8.77912	12.0677	10.345	3.80228	4.0526	5.8743	6.46023	7.69838	5.55216	12.1685	6.36865	1.96637	0.686983	3.92206	6.07341	4.90245	6.61388	0.0421942	7.9117	0.15815	C2
TCGA-CC-A7II-01	3.53415	9.86258	5.93324	0.218956	3.77722	11.5631	9.90643	8.65573	3.55247	5.15214	5.92886	7.23146	7.3158	5.85214	14.2804	6.19465	3.07457	0.234111	2.09255	6.54729	4.3668	6.40413	0.02554	2.91445	1.03268	C2
TCGA-GJ-A6C0-01	8.51895	9.35482	4.46709	1.90896	5.49182	3.91608	9.47395	9.6146	1.99164	4.63801	5.35537	4.67871	9.44126	5.55493	9.42846	7.42855	4.96343	1.68458	7.25933	5.21091	4.71615	6.47265	0.290498	5.13369	0.97419	C2
pvalue	0.0834474	3.2826e-10	7.4757e-10	1.04958e-16	9.63773e-09	0.142139	9.13319e-05	0.646728	9.41076e-38	7.47839e-07	3.25083e-05	6.43003e-23	0.0233239	5.39523e-23	1.55009e-05	7.74595e-07	2.60542e-11	0.000298462	0.183861	3.39785e-33	1.75441e-20	0.0050753	0.800324	1.87413e-05	3.46925e-13	NA

## Sheet: Table S5_2
Table S5_2 Heatmap and the boxplots of N6-me-thyladenosine between HCC subgroups.
Patients	METTL3	METTL14	WTAP	VIRMA	RBM15	RBM15B	ZC3H13	YTHDC1	YTHDC2	YTHDF3	YTHDF1	YTHDF2	HNRNPC	IGF2BP1	IGF2BP2	IGF2BP3	RBMX	HNRNPA2B1	FTO	ALKBH5	Groups
TCGA-G3-AAV0-01	2.40718	2.89888	3.34036	2.56496	2.1343	3.84169	2.89329	3.03359	1.75739	3.8073	4.73435	4.21189	6.17939	0.0298995	0.129612	0.0319772	4.26657	6.93248	2.12544	5.90736	C1
TCGA-DD-AAE3-01	3.26131	3.15326	3.20248	3.27873	2.34977	3.56453	2.66598	3.66122	2.25929	4.2215	4.92625	4.52907	6.53489	0.0137102	0.287387	0.0858548	4.75465	6.91251	2.29381	5.75646	C1
TCGA-DD-A11D-01	2.8056	3.21198	3.93643	3.52763	2.32689	3.73301	4.40016	3.86384	3.23846	5.08446	4.84537	5.05684	6.50568	0.0173732	0.302247	1.39712	4.60744	7.15937	3.06867	5.83047	C1
TCGA-G3-A6UC-01	3.79746	4.03916	3.77758	3.7311	2.87571	4.95659	3.8662	4.51645	3.3616	5.26024	5.60681	5.23389	6.66172	0.033665	1.39784	0.105415	5.89479	7.61386	3.15003	6.76788	C1
TCGA-K7-A6G5-01	3.07471	2.67309	4.20944	3.66575	2.46616	3.21301	3.08427	3.28993	2.44499	5.48168	4.64973	5.03373	6.50882	0.00873631	2.24106	0	4.27718	6.93749	2.3108	5.72926	C1
TCGA-DD-AAE4-01	1.58093	2.61636	4.17099	2.43967	2.80156	3.23978	1.68618	3.10365	1.49619	3.63257	4.61098	4.61819	5.72226	0.012424	0.302099	0	4.59762	6.92094	2.00338	5.39982	C1
TCGA-MI-A75G-01	3.01565	3.05532	3.97225	3.13278	2.1911	4.3419	3.02012	3.85346	3.0178	4.71927	6.07432	5.01169	6.18471	0.00840341	0.047838	0.104373	4.60797	7.36731	2.35723	6.6475	C1
TCGA-DD-AADV-01	3.70129	3.23547	4.26863	4.20059	2.77903	4.41772	3.38796	4.38577	3.51865	4.74742	5.63734	5.43897	7.07984	0.597543	3.11456	1.50821	5.66737	8.03144	3.66678	6.43825	C1
TCGA-LG-A9QD-01	3.05969	3.35165	4.11458	3.84053	2.2426	3.50477	4.93168	3.69168	2.63398	5.32906	4.82323	4.85541	6.4636	0.00860148	3.03182	0	4.38359	7.20474	2.34849	5.88403	C1
TCGA-DD-AACD-01	2.12778	2.1191	3.13589	4.10581	3.17371	3.52623	2.86386	3.02338	1.7576	5.19994	5.08197	5.01483	5.87033	1.15432	1.44445	0.0230384	4.56527	6.96321	1.68386	5.85777	C1
TCGA-DD-AAE7-01	2.6785	3.00433	3.85229	3.00388	1.83158	3.89542	4.16126	3.78981	2.22568	3.98755	4.98445	4.81964	6.40002	0.0307027	2.02221	0	4.78737	7.08846	2.25952	5.9097	C1
TCGA-DD-AADJ-01	2.49886	3.00959	3.7559	2.9	1.84794	4.21517	2.77432	3.32488	1.76135	3.63904	5.06187	3.89839	6.28122	3.519	5.39263	0.570676	4.93016	7.05577	2.02062	6.31482	C1
TCGA-CC-5259-01	1.07123	2.42656	3.67092	3.16422	2.26339	3.04091	1.29128	2.76423	1.5004	4.87012	4.82708	4.22582	5.74581	1.25228	3.06451	0.162785	4.33897	6.32191	1.89163	5.07686	C1
TCGA-HP-A5MZ-01	3.70368	2.85466	4.62597	4.0907	2.40708	3.74435	3.82287	3.96074	3.15622	5.78243	5.1166	5.13379	6.59151	1.16643	2.09131	0.0709393	4.97509	7.58281	2.59177	5.81076	C1
TCGA-DD-A39X-01	2.39717	2.55494	3.67458	3.19449	2.29001	4.41133	1.16972	3.33652	1.43796	3.75763	4.93978	4.50209	6.09551	2.09681	1.55003	0.0153941	4.85074	6.63293	2.24233	5.9227	C1
TCGA-2Y-A9GU-01	3.49807	3.71117	4.267	3.58371	2.39849	3.60056	4.1124	4.422	3.30469	5.30708	5.16856	5.51209	6.80651	4.10759	3.79603	0.236402	5.21379	7.99521	2.38451	6.41705	C1
TCGA-G3-A7M8-01	3.09404	3.0509	4.25359	3.02833	2.14309	4.3186	4.27051	4.04043	3.11064	4.65706	5.19911	5.23785	6.50099	0.010853	0.267082	0.0903839	4.71086	7.1187	2.94048	6.69987	C1
TCGA-DD-A3A5-01	3.0449	2.32459	4.57997	3.48928	2.07119	3.78546	2.34149	3.70019	2.43359	4.12877	5.35017	4.45846	6.08254	0	2.13154	0.125878	4.98758	7.10809	2.43209	7.33736	C1
TCGA-DD-AADM-01	2.45007	2.56284	3.83028	3.97619	2.75656	3.91791	1.91063	3.22272	2.86321	4.52192	4.83942	4.53802	6.12866	0.985328	1.48528	0.0385215	4.67473	7.04047	1.95877	5.67796	C1
TCGA-DD-AADU-01	3.49236	3.08764	4.33063	4.58786	3.65297	4.17891	4.84256	3.7703	2.40719	5.25978	5.70242	4.78177	6.2521	0.0114046	2.20741	0.0243027	4.52818	6.89693	3.1	6.42218	C1
TCGA-CC-A7IF-01	4.10978	3.04519	3.79457	4.41937	2.94543	5.15863	3.5974	4.17588	2.49639	4.65247	5.46812	4.95185	6.72398	1.48839	2.35086	0.0363858	5.40363	7.66547	1.80979	5.15912	C1
TCGA-DD-AAVW-01	3.74524	3.15926	4.36608	4.8684	2.12479	4.14648	4.45908	4.19007	3.3508	6.17197	5.27387	4.90973	6.98357	3.13462	4.00379	0.694276	5.42214	7.50044	2.63936	6.2894	C1
TCGA-DD-A3A7-01	1.25607	1.63283	3.62641	2.48035	3.11719	3.55459	2.24122	3.18968	1.8514	3.85354	5.56521	4.77699	5.7324	0.0244789	2.85565	0.0645884	4.97373	6.48898	1.4247	6.39056	C1
TCGA-EP-A2KA-01	4.09493	2.69595	4.43275	3.87131	2.34833	4.60856	3.23561	3.98472	2.5821	4.23553	5.98106	5.02027	7.06491	0.826701	3.87228	1.52997	5.66078	7.60904	2.39457	6.41025	C1
TCGA-ED-A7PZ-01	3.52642	2.31534	4.24456	4.13244	2.91361	4.29491	2.05087	3.43502	2.18579	4.79058	5.41009	5.29575	6.38679	4.92214	1.36874	0.911023	5.45776	7.4853	2.80579	7.46923	C1
TCGA-G3-A25U-01	3.51899	4.05852	5.40505	3.80475	3.04536	4.57766	5.989	4.86348	3.485	5.38202	5.78562	5.7589	7.15131	0	0.0599454	0.0665464	5.69099	7.66008	2.29742	6.42335	C1
TCGA-2Y-A9GZ-01	3.93138	3.40102	3.74832	3.75547	2.56807	4.26852	3.38548	4.2342	3.13575	4.49406	5.35851	5.11875	6.37995	0.0900365	0.226929	0.360985	5.47309	7.60063	2.91809	5.86607	C1
TCGA-DD-AADK-01	3.71156	2.28795	4.00101	4.01744	2.20189	3.73902	2.50846	3.57179	1.64115	4.9134	4.94074	4.34113	6.47681	0.833958	2.81027	0.130263	4.66143	7.05398	1.99884	6.1921	C1
TCGA-G3-A5SI-01	2.71547	2.81787	4.63218	3.91622	2.99303	3.88002	2.45231	4.29616	3.06063	5.07093	5.39887	5.51908	6.94797	2.05471	0.650255	0.0129999	5.96135	7.74807	2.00118	6.39154	C1
TCGA-DD-A4NI-01	3.10207	3.7556	4.45737	3.42385	2.46357	3.94489	5.10564	4.3036	3.46341	5.13938	5.15826	5.02898	6.52916	0	2.48458	0.171051	5.00571	7.7858	2.96566	6.14178	C1
TCGA-DD-A73A-01	3.51689	3.27407	4.47666	3.98388	2.67507	4.35122	4.49001	4.02707	3.52884	4.94108	5.59523	5.44152	6.54534	0.239398	0.637455	2.21759	4.87568	7.34562	2.58057	6.44375	C1
TCGA-ZS-A9CG-01	3.46587	3.45303	5.02095	4.76193	3.04551	4.55866	4.40881	4.38466	2.06827	6.27047	5.54359	5.42548	6.60444	2.10812	2.32044	0.0245495	5.41387	8.09877	3.00263	6.36679	C1
TCGA-FV-A4ZP-01	1.10003	0.758608	2.92887	2.82228	2.50942	3.23703	1.00765	2.41977	0.250553	3.88095	4.76968	4.59829	5.20246	2.41772	3.32358	0.773418	4.36249	6.05101	1.27158	5.1522	C1
TCGA-DD-AACJ-01	3.40688	2.9324	4.71971	4.28419	2.58779	4.3064	2.71558	3.61194	2.1924	4.99704	5.10004	4.05675	6.83532	0.038974	0.222575	0.337725	4.8849	7.51408	2.38177	5.05715	C1
TCGA-DD-AAVZ-01	3.62113	3.97303	4.64576	4.58271	2.41171	4.66026	3.95099	3.97021	2.78508	5.84525	5.36485	4.80604	7.14394	3.33322	4.22421	1.82778	5.60026	7.7201	2.32136	6.16209	C1
TCGA-DD-AAVR-01	3.07311	3.15657	4.79784	3.65045	2.51114	3.70762	2.97567	3.96596	2.35938	4.36059	4.97222	5.14092	6.95719	0.932215	2.76087	0.176466	5.30885	7.19238	2.49141	5.9136	C1
TCGA-RC-A7SB-01	3.28344	2.23079	4.26039	3.58026	2.30345	4.13396	3.96493	3.32242	3.0093	4.77514	5.07928	5.15392	6.21614	0.0532561	0.863834	0.256435	4.74509	7.50404	1.90884	5.58752	C1
TCGA-3K-AAZ8-01	3.32946	3.45606	4.81532	3.76757	2.77163	4.31629	4.41497	4.10689	2.63375	5.01256	5.07512	5.05122	7.14791	0	3.51275	0.0303708	5.24877	7.63723	3.10666	6.68888	C1
TCGA-UB-A7MF-01	3.4362	2.60832	4.88582	3.0242	3.08241	4.46967	2.49892	4.62859	2.57741	3.80318	5.38224	4.73445	7.03441	2.89037	4.37773	1.66209	5.5197	8.09781	2.40371	6.32243	C1
TCGA-ZP-A9D1-01	4.1725	3.69258	4.87556	3.95044	2.70316	4.32387	5.89195	4.49532	3.8405	5.34475	5.7805	5.35286	6.89397	1.36956	2.12691	0.784665	5.50781	7.89141	3.10597	6.02997	C1
TCGA-ZP-A9D0-01	3.51817	3.9241	4.11297	3.92759	3.154	3.28631	3.90807	4.49086	3.52986	5.18725	5.4401	4.79191	6.63404	2.00291	3.09061	0.143224	4.99868	7.67747	3.46788	6.41935	C1
TCGA-WQ-AB4B-01	2.54941	2.28135	4.02104	3.77528	2.26533	3.3296	3.33487	3.23262	2.68996	4.8152	5.32723	4.37852	6.49114	0.0547172	3.1985	0	4.56152	7.26154	2.24793	5.63453	C1
TCGA-NI-A4U2-01	3.27494	3.06844	4.29955	2.90531	2.33282	3.46333	4.20568	3.80483	2.89629	4.93221	4.97294	5.09878	6.26486	0	0.157846	0.0102744	4.58556	6.87701	2.45161	6.00629	C1
TCGA-RC-A7SK-01	3.03224	2.82629	3.68845	4.79877	2.32156	4.13104	4.3572	3.76434	3.0153	3.73431	5.21774	5.23534	6.78501	3.36454	4.82862	0.203942	4.41805	7.37636	2.98591	5.527	C1
TCGA-DD-AADS-01	1.0829	1.9344	2.89861	2.1602	2.40392	2.97932	1.94849	2.52946	1.8609	3.14212	5.28158	4.23282	4.47409	0	0.0999734	0	3.91368	6.07778	1.55518	5.28151	C1
TCGA-DD-A73F-01	3.41708	3.07102	4.25391	3.64594	2.71835	4.38513	3.25103	3.79968	3.00921	4.40654	5.6621	4.76995	6.54478	1.78452	3.34204	1.63909	4.85795	7.41305	3.16009	6.36893	C1
TCGA-DD-A11C-01	3.98058	3.4626	4.54983	4.42253	2.45293	4.61357	4.44395	4.48981	3.52838	5.48399	6.15126	4.98912	6.8235	3.5406	0.668325	0.837333	5.23004	7.7055	3.45413	5.71267	C1
TCGA-DD-AACO-01	1.27624	2.62939	4.28067	2.82725	3.47159	4.07028	1.46861	3.52043	1.47867	4.46206	5.13888	4.857	5.4144	1.54404	3.20571	0.0653572	5.07356	6.87471	1.3852	5.97252	C1
TCGA-DD-AAED-01	4.22877	2.83112	4.75647	4.38247	3.04623	3.89427	3.30336	3.89931	2.96085	5.56411	5.8343	5.74878	7.36267	3.69615	5.82009	0.583022	5.17027	8.10652	1.58044	6.72917	C1
TCGA-BC-A10X-01	2.77579	3.58002	4.63587	3.64894	3.1373	3.6626	4.07947	4.50426	3.39745	5.30876	5.45682	5.49819	6.57584	0.473595	1.86955	0.0428338	4.91885	7.32796	3.15613	6.32255	C1
TCGA-DD-AAD3-01	3.22994	3.50037	4.13775	3.51464	2.63369	4.0207	3.73112	3.7831	3.14949	4.83708	5.27985	5.14905	6.61822	0.638446	3.38102	0.694815	5.08327	7.29078	2.61825	5.61804	C1
TCGA-K7-A5RG-01	3.82671	3.21787	4.9399	4.05392	3.10223	4.29985	3.75308	4.20643	3.80015	4.90431	5.23288	5.32851	7.12537	3.55446	5.1877	2.05682	5.8431	7.55622	3.2942	5.74332	C1
TCGA-DD-AACF-01	4.07237	2.67479	4.53383	3.81919	2.84577	4.30259	2.47375	3.4401	2.47494	4.17691	5.22872	5.07434	7.19693	1.08205	0.718957	0.0621313	5.88364	7.5676	1.95972	6.50307	C1
TCGA-DD-A3A2-01	3.08093	2.89652	3.69012	3.1097	2.2728	3.63634	4.2841	4.02589	2.3725	4.58464	4.85128	4.66202	6.34617	0	0.476641	0.0427036	4.34962	7.05002	2.31444	5.96805	C1
TCGA-DD-A115-01	3.24871	2.96108	3.93472	3.65219	2.28161	4.47775	2.47127	4.08265	3.21095	4.59322	5.32162	5.07916	6.26202	0	0.460012	0.710837	4.60076	7.33496	3.36612	5.74234	C1
TCGA-DD-AADO-01	1.51748	1.40094	4.31474	3.41358	2.11432	3.20946	1.42688	2.54667	1.1514	3.09312	4.7658	4.00448	5.57706	3.85046	3.54988	0.0736691	4.97608	6.75134	1.21053	5.50895	C1
TCGA-BC-A110-01	2.59697	2.6577	4.80921	2.55771	2.96435	3.88258	3.5125	3.95197	2.5766	4.32261	5.40584	5.46256	6.19924	0	1.64397	0	4.95012	6.77031	2.38436	5.96419	C1
TCGA-DD-AAW3-01	3.93122	3.94747	4.05354	4.96662	3.35885	5.28254	3.79247	4.72928	2.99574	6.50357	5.68787	5.79154	7.35678	0.016853	0.154482	0.0708051	5.45639	7.90638	2.75935	7.55087	C1
TCGA-2Y-A9H7-01	3.40235	3.67171	3.70766	3.52486	2.27233	4.51808	3.50123	4.22166	2.65681	4.78606	5.52874	4.41197	6.78209	4.43393	4.8183	2.60373	5.23579	7.76301	2.16266	6.35549	C1
TCGA-RC-A6M5-01	3.117	3.1429	4.52116	3.52058	2.59121	4.49057	4.65913	4.17042	3.02687	4.35011	5.15421	5.35777	6.72554	0.941996	2.29386	1.11448	5.09425	7.216	4.47588	6.29049	C1
TCGA-BC-A69H-01	3.04988	1.93631	4.54138	4.04402	2.16579	4.63408	1.76298	3.20841	1.27096	4.34054	5.42731	4.48179	6.434	4.14066	5.15345	0.336268	5.11532	6.99689	1.47216	5.30308	C1
TCGA-BC-A69I-01	2.70384	2.67943	3.8844	2.73641	2.859	4.18552	3.56117	3.43502	1.99118	4.41289	5.41356	4.98934	6.18531	0.136622	0.284966	0.0217452	4.67438	6.79383	2.5323	7.08712	C1
TCGA-ED-A627-01	3.42779	3.32525	5.27367	3.47774	2.9895	4.55598	4.22932	4.67888	3.3217	5.17463	5.6187	5.68486	6.87749	0.261317	2.56608	0.124214	5.56498	7.55154	3.28279	6.38749	C1
TCGA-DD-AACC-01	2.7364	2.54423	4.65326	2.8464	2.65773	4.10128	2.93226	3.38298	2.85887	4.17473	5.49287	4.35807	6.47732	0.488248	3.19875	0.153247	4.94544	7.29868	2.31922	5.51598	C1
TCGA-DD-A3A9-01	2.84058	3.06799	4.78019	2.67661	2.2101	3.93802	2.01981	3.32531	2.01011	3.6287	5.63306	4.73236	6.42299	2.47174	2.78888	0.0222589	5.24527	6.90028	2.2045	6.49256	C1
TCGA-ES-A2HT-01	2.26151	1.94398	3.16031	2.89364	1.82891	2.99914	2.27714	2.54768	1.75641	4.05259	4.26904	4.55621	5.72262	0.494931	1.1392	0	3.61117	6.40858	1.66602	4.66965	C1
TCGA-2Y-A9H3-01	2.64814	2.32504	3.97892	2.93519	2.14775	3.25925	2.07696	3.11442	2.09235	3.77216	4.95566	4.42498	6.0534	3.89382	2.68054	0	4.8746	6.66462	1.36321	6.00393	C1
TCGA-2Y-A9HB-01	3.17224	3.40243	4.56737	3.46628	2.9506	4.46823	4.56428	4.31003	3.42757	4.68783	5.31351	5.37759	6.74076	0.200259	3.35984	1.25866	5.09279	7.66965	2.63349	6.29625	C1
TCGA-DD-A3A6-01	3.3559	1.84597	4.63363	2.91683	2.54509	4.50938	3.03141	3.52715	2.82076	4.75507	6.12086	5.14224	6.07043	0.0147674	2.52363	0.0314275	4.69418	6.42929	3.82482	6.38058	C1
TCGA-BW-A5NO-01	3.37825	3.06813	5.03528	3.85537	2.0698	4.16287	2.70538	4.00619	2.65926	4.83954	6.272	5.09157	6.82437	2.33744	4.09129	1.16584	5.2238	7.7124	1.8727	5.5298	C1
TCGA-CC-A7IL-01	3.66924	2.56799	3.44544	3.88312	2.08627	4.56428	2.74022	3.7527	2.86084	4.37129	5.80645	4.61521	6.57332	0.0232759	0.285725	0.0166459	4.65565	7.39232	2.72014	4.86668	C1
TCGA-DD-AACV-01	3.95848	3.24009	4.66948	4.13473	3.11202	4.14858	3.04662	4.32692	3.3267	5.09602	5.97157	5.30881	6.70889	0.0608442	2.79182	0.613701	5.48524	7.73238	2.6774	6.55018	C1
TCGA-KR-A7K2-01	2.86523	2.99099	4.73754	3.62071	2.89464	3.72621	2.63156	3.95967	2.63399	4.71323	5.22676	4.799	6.93176	1.71321	3.30423	0.0617208	5.11413	7.67196	2.078	5.74215	C1
TCGA-DD-AAEG-01	3.71243	3.74014	3.57646	4.9625	2.56678	4.7323	3.38617	4.42709	2.96945	3.88495	6.04561	6.02659	7.32869	2.52459	2.93417	0.78892	5.34876	7.63397	2.83733	6.27935	C1
TCGA-DD-AACG-01	1.8475	2.30582	4.42723	3.64534	2.79612	4.1647	1.66918	3.01996	2.02558	4.43582	5.13565	5.57828	6.12856	2.06308	4.88015	0.513309	4.73854	7.29727	1.1508	5.20005	C1
TCGA-CC-A123-01	1.21687	1.7666	4.05205	3.54283	2.78666	3.90182	1.5947	2.9027	1.55	4.55727	5.08825	5.28525	5.72612	2.97843	3.86859	0.252959	5.09708	6.92034	1.50155	4.98298	C1
TCGA-DD-AAVQ-01	3.55622	2.97581	4.72871	3.98272	2.60306	4.53768	2.71514	4.14696	2.1422	4.75506	5.38885	4.895	7.14652	2.61861	5.06986	0.652429	5.91081	7.74867	2.03107	5.70666	C1
TCGA-RC-A7S9-01	3.28016	3.24018	4.23012	2.841	3.07056	4.47166	2.80551	4.24901	2.58861	4.2094	5.08792	5.26774	7.09013	1.6113	3.56517	0.00901299	5.2186	8.18073	3.20753	6.4822	C1
TCGA-DD-A4NK-01	3.73514	3.80025	3.5161	4.0874	2.90355	4.49414	4.96837	4.45346	3.3948	5.62546	5.49519	5.42881	6.40031	2.20891	1.1402	0.29448	5.29525	7.83827	3.10631	6.52239	C1
TCGA-DD-AADI-01	3.48087	2.57704	4.6072	3.94556	3.00456	4.48034	3.10663	3.80224	1.92498	4.85827	5.58597	4.93961	7.04793	2.68145	4.32042	0	5.56631	7.49579	1.99274	6.46073	C1
TCGA-DD-AACY-01	2.97062	3.22103	3.61231	4.24177	2.79574	3.37752	3.97334	4.13158	2.32387	4.27552	5.28745	5.0766	6.87823	1.93227	3.15153	0.0514676	5.01579	6.88788	2.52775	6.30385	C1
TCGA-DD-AAW0-01	3.60391	3.14208	3.8417	4.35956	2.90044	4.28576	4.50688	3.98716	3.65445	5.82572	5.48979	4.86684	6.72322	0.435501	4.03666	0.216152	5.03445	7.32789	2.47019	6.36027	C1
TCGA-5R-AAAM-01	3.19621	3.11237	3.95679	3.86093	2.5972	4.2862	3.97249	4.22462	3.20685	5.04526	5.3892	5.09977	6.49897	0.0733263	2.14635	0.755519	4.8841	7.2041	3.00993	5.46196	C1
TCGA-ZS-A9CF-01	3.92421	3.56992	4.32955	3.88924	3.65502	4.03663	4.48671	4.83575	3.32268	5.3466	5.37908	5.04355	7.1528	0.889123	0.21675	0.299226	5.78738	8.02838	3.28909	5.86995	C1
TCGA-DD-AACI-01	2.30223	2.71199	3.95829	3.55951	2.96844	3.51546	1.63395	3.47829	2.07346	4.70468	5.55972	5.15496	6.16461	1.74233	2.98626	0.0190378	5.0512	6.73165	1.61843	6.07501	C1
TCGA-EP-A3JL-01	3.47452	2.45385	4.10223	4.27021	2.12613	3.77864	3.35735	3.57333	2.45182	4.80196	5.42505	4.92832	6.64802	1.90507	2.45638	0.265267	5.03248	7.5007	2.6372	5.872	C1
TCGA-ES-A2HS-01	2.21832	2.48559	2.86907	3.11356	1.63495	3.64351	1.83767	3.22461	1.61174	4.28731	5.25954	4.03283	5.36499	1.28982	0.0601889	0	4.27919	6.70739	1.24577	5.76476	C1
TCGA-DD-A119-01	2.50165	2.8699	4.04628	3.99589	2.91149	3.8409	2.68682	3.61999	2.35881	5.38749	5.26793	4.7117	6.74593	1.49535	1.93245	0.0170281	4.60262	6.65886	1.76156	5.02601	C1
TCGA-2Y-A9H1-01	2.1356	2.32231	3.43593	3.86664	2.37784	3.28901	1.67099	2.47347	1.73714	5.09137	4.44657	4.68483	5.72379	0.03155	2.94866	0.0225815	4.16488	6.15838	1.53319	5.42148	C1
TCGA-G3-A5SK-01	2.23649	3.4539	4.53626	2.75844	2.408	3.39592	3.96139	3.62062	2.68329	4.91771	4.91931	4.95616	6.2799	0	0.907348	0.136493	4.5794	7.09127	2.64803	5.65223	C1
TCGA-DD-AAE1-01	3.77473	2.87696	4.21094	4.5421	1.9428	3.9984	2.95321	3.73446	2.31537	5.25384	5.02358	4.3063	6.86716	4.81099	7.04564	1.88666	5.00423	7.45311	2.14942	6.34676	C1
TCGA-DD-AADN-01	2.40602	1.67321	2.97758	3.97113	2.63001	4.64275	1.30069	3.069	1.04026	4.18209	5.22093	4.6807	6.07983	2.21801	4.07248	0.750354	4.44159	6.68017	1.81888	4.96307	C1
TCGA-DD-A73C-01	3.43756	3.3115	4.19109	4.00679	2.78975	4.40623	5.24219	4.63812	3.52468	6.15281	5.54904	5.5139	6.74778	0.0203479	0.26896	0.0954643	4.93944	7.35351	3.159	6.24358	C1
TCGA-FV-A495-01	2.62606	1.9543	4.05453	2.57563	2.82355	3.93508	2.2399	2.90855	1.71692	3.31932	4.79959	4.67276	5.98371	0.998647	3.98419	0.149267	5.10637	6.481	1.64805	5.15101	C1
TCGA-DD-A1EK-01	2.74469	3.05692	3.65073	3.3198	3.01877	4.39036	3.23841	3.8827	2.04662	5.07019	5.76595	5.32003	6.52286	1.1198	2.76681	0.934566	4.62165	7.43468	2.93321	6.35933	C1
TCGA-DD-AAD6-01	4.23167	3.4816	5.00627	4.76946	3.71295	5.45053	3.89694	4.34978	3.27978	4.66498	6.33326	4.86802	6.93241	1.86769	0.0907574	0.858187	5.42266	7.96388	2.90924	5.6579	C1
TCGA-G3-A3CH-01	3.35536	3.59189	4.7764	3.98992	3.07933	4.52803	3.59803	4.37031	3.02326	5.23917	5.5208	5.48988	6.54697	2.60931	1.47892	0.523254	5.36981	7.5085	1.99347	5.75897	C1
TCGA-DD-AAEA-01	3.56024	2.40473	4.79161	3.36407	2.71681	4.64959	3.25911	3.42682	3.40273	4.60344	5.93073	5.13719	6.53356	0.16474	3.43332	0.930732	5.33577	7.97377	2.90599	6.0794	C1
TCGA-CC-A7IH-01	4.25611	3.85152	4.72867	4.36117	3.02749	4.69776	4.68692	4.42442	3.19042	5.78925	5.79104	5.7385	6.79586	0.595457	0.374322	0.134069	6.02779	8.1386	3.47606	7.06059	C1
TCGA-MI-A75H-01	3.3892	3.51772	3.6354	4.17418	3.23502	4.55664	4.34068	4.00464	2.35623	5.58428	5.31017	5.13792	6.83617	0.127174	0.195406	0	5.10463	7.60875	3.21739	6.60379	C1
TCGA-DD-AAD8-01	3.41424	3.19229	5.03457	2.94983	3.89886	4.29582	5.38608	4.48016	2.92059	4.03175	5.51975	5.56613	7.07203	0.38048	3.42557	0.968938	5.54221	8.29412	2.45094	6.0376	C1
TCGA-DD-A73D-01	3.77052	3.6509	4.66192	4.00697	3.17893	4.53108	3.77804	4.38254	2.71721	5.78956	5.51527	5.67366	7.1084	0	0.123373	0.843747	5.59794	7.46603	3.13156	6.37016	C1
TCGA-K7-A5RF-01	2.82668	3.36557	4.10773	3.17792	2.65555	3.95306	3.67071	3.91209	2.75139	4.38525	4.94866	4.83597	6.16456	0.0398642	2.07738	0.229486	4.43792	6.82829	2.76063	6.1006	C1
TCGA-DD-AACT-01	3.18095	3.09639	4.57159	3.62578	2.9371	3.73367	2.92472	3.73659	2.47669	4.82201	5.50476	5.01418	6.64729	1.70597	2.9728	0.0998206	4.68208	7.27835	2.75301	6.10787	C1
TCGA-DD-A73B-01	3.44119	3.30768	5.32639	3.75376	2.61592	3.83476	3.18915	4.11069	3.47863	4.31062	5.78373	4.84772	6.92277	2.18092	2.76443	0.878406	5.6705	8.02692	3.5463	5.58846	C1
TCGA-DD-A4NO-01	3.01839	3.08127	4.82458	4.29193	2.6141	3.96878	4.08981	3.94857	3.75861	5.27118	6.06923	5.13991	6.31819	0.0688649	3.29882	0.172587	5.22024	7.45578	2.91851	6.52738	C1
TCGA-2Y-A9H8-01	3.72614	2.79386	3.99671	3.76267	2.84138	4.90651	3.12388	4.20504	2.56857	4.55075	5.35497	5.19231	7.28303	4.12467	6.28993	0.229049	5.48333	7.97681	1.25501	6.20288	C1
TCGA-DD-A3A8-01	3.52341	3.29483	3.71519	4.17686	2.53417	4.19864	3.305	3.64159	1.46856	5.71809	5.29641	5.12373	6.27454	1.92625	2.88216	0.0444709	4.86047	7.3919	2.64046	6.43959	C1
TCGA-RC-A7SF-01	3.59037	3.01959	4.07459	4.54558	2.23303	3.86281	3.393	3.83801	3.35787	5.73439	4.92418	4.98946	6.60298	0.0253604	3.87749	0.676147	4.99032	7.53978	2.1047	5.99645	C1
TCGA-HP-A5N0-01	3.46988	3.23394	3.57524	3.58419	2.55014	4.45321	3.6325	4.13792	2.88484	4.88632	5.46188	5.36217	6.54701	0.114701	1.91233	0.0457302	5.22071	6.87947	3.48486	5.67084	C1
TCGA-DD-A73E-01	4.52544	4.4605	4.20307	4.32747	3.84439	5.79996	3.64567	4.8774	3.21165	5.69102	6.16576	6.09563	6.87034	1.32191	0.128404	0.0295792	5.80194	8.27459	4.17841	7.12152	C1
TCGA-G3-A5SL-01	3.44311	3.03856	3.8495	4.97718	2.72419	4.4134	4.86203	4.2229	2.59866	6.60675	5.58354	5.25616	6.95209	1.8298	1.84882	0.0200387	5.25808	7.94863	2.64684	5.32783	C1
TCGA-2Y-A9H6-01	3.37525	3.46416	4.65756	3.50992	2.17375	3.86447	5.02273	4.38976	2.89094	4.71907	5.55203	4.72902	6.52857	2.19121	0.784334	0.208214	5.14828	7.5051	2.92447	6.62155	C1
TCGA-WX-AA47-01	2.73861	2.21464	4.22443	2.81646	2.7383	4.23125	4.06533	4.10588	2.9196	4.46376	5.42646	5.44552	6.74286	0.181514	0.331045	0.388534	5.08801	7.32483	2.89648	6.08554	C1
TCGA-MR-A520-01	3.00202	3.09923	3.98845	3.14347	1.86802	3.75665	3.68922	3.54785	3.12372	4.79125	4.84714	4.66755	5.97639	0.0317831	0.881855	0.0562133	4.24405	6.84237	2.95045	6.26297	C1
TCGA-DD-A3A1-01	2.45438	2.57097	4.02853	3.34897	2.75386	4.04759	2.45238	3.53301	2.95073	4.71658	5.04767	4.64204	6.09949	0.0650557	2.5181	0.259983	4.50751	7.06714	2.11143	5.81167	C1
TCGA-DD-AADF-01	2.85589	2.61273	3.36725	2.93877	2.73895	3.9427	2.1704	3.5333	2.76813	3.84892	5.23975	4.90876	6.25078	0.053928	0.215612	0.034861	4.88786	7.10254	2.46496	5.70667	C1
TCGA-G3-A7M7-01	3.74866	2.7975	4.18059	4.33752	1.99029	3.79171	3.37615	3.55629	2.43948	5.47661	4.95109	5.26415	6.54394	1.4379	2.92152	0.0113801	4.2867	7.04219	2.61168	5.91733	C1
TCGA-DD-AADQ-01	2.83227	2.78422	3.72418	3.59307	2.40625	3.9917	3.62886	3.8653	3.14387	4.87627	4.76296	5.12645	6.83466	0.676639	2.89612	0.0100085	4.9676	7.30856	3.0174	5.97383	C1
TCGA-DD-AAVX-01	3.09966	3.48008	5.03828	4.08847	2.58639	4.49219	4.52408	4.10808	2.96866	4.85632	5.16312	5.44621	6.62242	0	0.683411	0.185662	5.01543	7.549	2.8238	6.05217	C1
TCGA-MI-A75E-01	3.3254	3.09274	4.11266	3.50495	2.22786	4.35434	3.28736	3.67378	2.35596	4.28646	5.10723	5.14066	6.62533	0.00953028	1.23359	0.0502818	4.79909	7.00096	2.54128	5.36846	C1
TCGA-DD-A11B-01	3.59915	3.43823	4.65141	3.83072	2.38565	4.0074	4.41408	4.48434	3.99204	5.9689	6.17269	4.81235	6.54658	1.89465	3.47142	0.31106	5.33951	8.03788	3.20839	6.59361	C1
TCGA-LG-A6GG-01	3.3542	4.10518	4.10186	3.60564	2.85901	4.22245	4.49686	3.60176	3.58879	4.52694	5.43231	5.17377	6.4096	0.0283958	3.87673	3.46113	5.54033	7.56617	3.30524	5.84298	C1
TCGA-DD-A39V-01	2.73696	2.63432	4.05414	4.2225	2.68328	3.7777	2.00684	2.97292	1.83603	4.71122	5.39786	4.20249	6.01565	0.571455	1.81402	0.0647413	4.85153	7.13886	1.92565	5.40147	C1
TCGA-ZP-A9CY-01	3.2932	3.46093	4.29188	3.39672	2.5912	4.05082	4.16847	4.18326	3.25696	4.93173	5.11865	5.29673	6.43013	0.0215771	0.446101	0.0457988	4.86852	7.54432	3.01577	6.23517	C1
TCGA-NI-A8LF-01	4.02756	3.25262	3.75338	3.52285	2.74258	4.37961	2.96361	4.17957	3.04137	4.84511	4.79657	5.12283	6.51435	1.65065	1.00582	1.47705	4.94962	7.44612	2.78738	6.1133	C1
TCGA-DD-AAE2-01	3.29524	3.72723	4.29087	3.73818	2.92637	4.35055	3.49611	4.55154	3.24679	5.88739	5.73921	5.75185	6.73637	0.298037	0.425832	0.33255	4.8893	7.80558	3.38496	6.08048	C1
TCGA-KR-A7K8-01	3.42733	2.83585	4.46224	3.41804	3.09841	4.00562	2.76844	3.87748	2.4183	4.85654	5.30887	4.90911	6.32222	0.0242811	0.847969	0.378211	4.86806	7.46124	1.91013	6.49003	C1
TCGA-EP-A12J-01	3.96358	4.21087	3.92245	4.75407	3.58124	4.59544	4.55441	4.57703	3.21839	6.13802	5.64891	5.54969	6.82853	0	3.22005	0.012807	5.77818	7.75857	3.56826	7.00605	C1
TCGA-DD-A4NV-01	3.63012	3.63663	4.32701	3.41205	2.73509	4.91323	4.24934	4.24585	3.77022	5.08525	5.92244	5.36974	6.31425	0.277303	0.653815	0.11777	5.24847	7.71046	3.10126	6.6057	C1
TCGA-BC-A3KF-01	3.75888	2.97886	3.94894	4.02789	2.27471	4.76733	2.99913	3.85606	3.52293	5.56431	6.158	5.52059	6.86876	2.74757	4.15642	2.2674	5.10505	7.70122	3.55469	8.20004	C1
TCGA-G3-A3CK-01	3.56132	3.6944	4.81782	3.84115	3.10795	4.36457	4.5613	4.29643	3.57632	5.1504	5.49632	5.36444	6.81782	0.060818	0.182185	0.0964284	5.10809	8.49632	3.73834	6.22378	C1
TCGA-ZS-A9CE-01	3.18977	3.21631	3.57123	3.24475	2.55745	4.00259	2.86149	3.80068	2.6823	4.50865	4.78722	5.11639	6.38698	0.014443	2.00005	0.337795	5.02364	7.21974	2.67051	5.36635	C1
TCGA-DD-AADA-01	3.10374	3.77817	4.14679	3.64978	2.60846	4.1551	3.3275	4.22091	2.24269	4.93324	5.36391	4.41759	6.97102	3.71657	3.70016	0.0325329	5.40349	7.62463	2.15971	6.25838	C1
TCGA-G3-A25X-01	2.49508	2.7346	4.66011	3.46097	3.00027	4.48013	2.45792	3.92633	1.81852	3.78565	5.55074	5.56315	6.74931	1.87141	3.33245	0.52648	5.64386	7.41244	2.09353	5.65343	C1
TCGA-2Y-A9H5-01	3.41067	3.76622	4.25657	4.1896	2.69593	4.45938	3.29712	4.89919	3.12406	5.55194	5.81031	5.16266	7.1227	1.27793	4.38145	1.38018	5.41534	7.7054	2.52722	6.38506	C1
TCGA-G3-A3CG-01	2.8034	3.69153	4.80136	3.6172	2.86541	4.21632	5.01555	4.24606	2.83852	5.45157	5.35335	5.16709	6.56243	0.399228	2.28309	0.433685	4.87243	7.64127	3.16504	6.14758	C1
TCGA-ED-A4XI-01	3.44159	3.8722	4.48717	3.69541	2.72336	4.44162	4.02772	4.33583	2.92087	4.85179	5.16921	5.56275	6.51227	2.9969	3.95964	1.13534	5.23105	7.24472	2.79886	6.29763	C1
TCGA-2Y-A9GT-01	3.48351	3.35038	4.71372	2.98058	2.55769	4.04643	4.62037	3.9983	3.20068	4.72743	5.11315	4.74788	6.37755	0.0262441	0.256086	0.0556046	5.25922	7.38081	2.61644	5.46062	C1
TCGA-DD-A1EB-01	3.35801	3.58403	4.28401	3.81241	2.50294	4.0841	5.27364	4.66697	3.3827	5.3204	5.56103	5.25768	6.71866	0	0.761991	0.146753	5.22486	7.1716	3.36619	5.76786	C1
TCGA-DD-AACE-01	3.18949	3.02218	3.90725	3.70525	2.99481	4.83372	3.72087	4.13852	3.00308	5.10484	5.73701	5.531	6.53521	0.0471132	0.173409	0.292793	5.04706	7.60014	3.5701	5.46881	C1
TCGA-2Y-A9H9-01	3.352	2.94561	4.13784	3.29204	2.23261	3.99213	5.99199	4.28324	3.41351	4.42273	5.17344	4.79155	6.37103	0.163079	1.53573	0.190161	5.07435	7.44964	2.84263	5.06307	C1
TCGA-CC-5262-01	3.33349	2.87475	4.9924	3.83804	2.61242	4.83533	2.51388	3.87407	2.41488	4.55032	5.6483	5.60622	6.74505	0.109452	0.912417	0.205862	5.1694	7.42801	3.00136	5.90166	C1
TCGA-G3-AAV2-01	3.95834	3.41189	4.52173	4.00592	3.10034	4.94405	4.57754	3.55034	1.88005	5.01898	5.47631	5.2075	6.71241	0	0.372904	0.0334297	4.87564	7.61264	3.28777	6.87446	C1
TCGA-UB-A7ME-01	4.20821	3.21076	4.11432	4.5459	2.75332	4.89749	3.21562	3.9552	2.85817	4.89354	5.93424	5.18505	7.19073	3.27826	4.04413	1.65302	5.55979	7.68593	2.86608	6.29545	C1
TCGA-DD-A11A-01	3.2883	2.85035	4.52319	4.27656	2.97245	4.18757	3.58691	4.16156	3.2761	5.60957	5.76189	5.32249	6.61749	1.58009	1.8403	2.95862	5.26178	7.82411	2.75961	6.63532	C1
TCGA-DD-AAEK-01	3.57143	3.54457	4.03614	4.78569	3.02523	4.37758	3.68294	4.35081	3.88464	5.61248	5.78281	5.07944	6.5026	0	0.418698	0.149619	5.30673	7.60839	3.32368	6.63787	C1
TCGA-EP-A2KB-01	3.44826	2.86265	4.85838	4.20016	2.26756	4.38032	3.52359	4.24496	3.22736	4.809	5.26036	4.63212	6.78299	4.03351	6.16437	0.0769691	6.00371	7.45573	2.38994	6.4838	C1
TCGA-G3-A5SM-01	3.08781	2.81485	4.32337	3.24011	2.40799	3.86578	3.27665	3.69638	3.13668	4.43706	5.2571	4.80434	6.3664	0.945288	1.05252	0.249057	4.92413	7.2641	3.02276	5.51912	C1
TCGA-DD-AAEB-01	2.22603	3.34285	3.88741	3.2005	3.18974	3.22464	3.79745	3.42261	1.53556	4.34685	5.01661	4.93867	5.57059	0.0149826	0.264027	0	4.61887	6.96527	1.84237	5.18285	C1
TCGA-BC-A5W4-01	3.45031	2.42652	3.40712	3.27846	2.6184	4.45121	2.6607	3.0464	2.1501	4.05686	5.31173	5.38141	6.4814	0.495666	3.91799	0.0507712	4.56448	6.82713	2.76902	5.72105	C1
TCGA-BD-A3ER-01	3.44767	3.1735	4.73342	3.64743	2.87095	4.41407	4.68532	4.39326	2.74811	5.16608	5.68486	5.00489	6.77852	1.09729	2.94154	0.0120837	4.85453	7.6042	2.9174	6.15095	C1
TCGA-ZP-A9CV-01	3.44173	3.83424	4.72134	4.01853	2.93879	4.38984	4.6918	4.23001	3.15402	5.76158	5.7514	5.61829	7.1075	0.0118349	3.24212	0.535661	5.37904	7.76016	3.2049	6.58744	C1
TCGA-DD-AADY-01	3.3768	3.74703	3.83912	4.34282	3.17834	3.40273	3.85904	4.42092	3.4809	5.67134	5.49679	4.6361	7.008	1.0183	4.16564	0.0400415	5.97307	7.75938	3.5383	5.38318	C1
TCGA-G3-A3CI-01	2.99747	2.67317	4.12075	2.38196	1.73977	4.04395	4.64246	3.89052	2.76709	4.36764	4.83793	4.80267	6.16591	0	1.0388	0.0363378	4.57865	7.06745	2.82145	6.21342	C1
TCGA-FV-A496-01	3.80171	2.45161	4.41315	3.42236	1.95648	4.15044	3.74077	4.24073	2.04718	4.54107	5.23331	4.81637	6.37184	1.81913	0.40863	0.117128	5.45357	7.23165	2.68607	6.13597	C1
TCGA-XR-A8TE-01	3.24205	4.00511	5.66853	3.97107	3.79276	4.47335	4.81557	4.68259	2.68225	5.49108	5.90273	5.48303	7.08143	5.33941	6.81302	0.0903899	5.38148	7.90685	4.26414	6.74852	C1
TCGA-DD-A3A4-01	2.95722	3.2338	4.27101	3.25174	1.96432	3.91284	3.11084	3.58853	1.83136	5.04127	5.03158	5.45254	6.42089	0	0.0426068	0.0119788	4.30274	6.8395	3.70629	5.04583	C1
TCGA-RC-A6M4-01	4.0351	3.17922	3.74128	4.33195	2.57744	4.68499	2.0634	4.00993	2.7541	4.92726	5.30272	5.20585	6.3842	2.03613	2.52936	0.124639	5.33239	7.31875	2.97607	5.83919	C1
TCGA-ED-A7PY-01	3.27593	3.00907	4.39794	3.78004	2.73182	4.501	3.52653	3.62893	2.69954	4.21164	5.4967	4.6695	6.9182	3.52784	4.86418	0	5.47026	7.75611	1.78027	6.07542	C1
TCGA-DD-A113-01	2.99308	3.34734	4.41813	4.43624	2.856	4.24602	3.99325	4.71539	3.0038	4.86445	5.57751	5.47521	6.76965	1.85458	2.90053	1.2024	5.59279	7.96323	2.95213	6.47093	C1
TCGA-KR-A7K0-01	3.99821	3.568	5.0055	3.58703	3.36211	4.20244	4.07259	4.33957	3.51202	4.91279	5.42585	5.5872	6.84855	4.07079	0.604564	0.308573	5.39154	7.88396	2.98388	5.20837	C1
TCGA-DD-A4NL-01	3.11004	3.21648	4.04574	2.95714	2.3065	3.52298	4.6072	3.82045	2.92359	4.46422	4.73312	4.93171	6.10948	0	1.69632	0.026019	4.51699	6.87285	2.93028	5.83	C1
TCGA-DD-A39Z-01	3.16029	2.8729	3.25325	3.44493	2.26897	4.12367	2.57874	3.27323	1.73277	4.65661	5.08529	4.86806	6.43233	0.0339134	2.61107	0.215648	4.65888	6.99958	1.26086	5.7415	C1
TCGA-DD-AADG-01	3.87077	3.63826	3.55362	3.72038	2.84264	4.58252	4.08679	4.22669	2.92456	4.86074	5.7296	5.46571	6.58352	1.01556	0.0625833	0.1465	5.37776	7.48861	3.39055	5.79067	C1
TCGA-DD-AAW1-01	3.83824	3.55594	4.52557	4.3866	3.03484	4.17904	4.20162	4.23984	2.56264	5.94691	5.34122	5.04057	6.43233	0	1.45863	0.0204917	5.47569	7.60781	3.42963	6.61864	C1
TCGA-DD-AAC9-01	2.56259	2.39068	3.92049	2.97397	1.73618	3.65368	2.44046	3.16592	1.82166	4.0459	4.61626	4.51142	6.15334	0.138566	2.41571	0	4.2187	6.73256	1.84317	5.41126	C1
TCGA-G3-A25Z-01	3.10195	2.46129	4.5268	3.17687	2.09777	3.88307	3.09847	3.37244	3.10979	4.38555	5.04532	4.70466	6.58739	0.0151327	0.0989545	0.168819	4.69136	7.24765	2.68773	5.2831	C1
TCGA-DD-A4NF-01	4.27407	4.06318	4.73211	4.49012	3.66543	4.55174	5.22132	4.79386	3.21688	6.18274	5.79642	5.75985	6.78126	4.10708	0.390366	0.0124163	5.8036	8.39648	3.93753	6.86348	C1
TCGA-G3-A25V-01	2.95625	3.08465	4.86927	3.35669	2.29815	3.88867	3.58305	3.93072	3.08156	4.7677	5.13646	5.47682	6.68428	0.0363398	0.58784	0.113571	4.62656	7.28144	2.37991	5.55566	C1
TCGA-G3-AAV5-01	4.14186	2.98146	4.27289	3.86468	2.63873	4.25294	3.09225	3.69443	3.19579	4.68177	5.21995	5.24217	6.88578	0.00786976	2.56671	0.174778	5.65198	7.98248	2.61591	5.30836	C1
TCGA-BD-A2L6-01	3.03304	3.42927	4.7184	3.10471	2.69791	4.18791	3.25321	3.98097	2.20551	4.75825	5.61396	5.04604	6.68087	0.331792	0.800147	0.406624	4.99958	7.49726	2.44249	5.63651	C1
TCGA-XR-A8TF-01	3.799	3.77589	4.48482	4.00341	3.04831	5.00088	2.67062	4.33695	4.04386	4.97993	6.15811	5.15403	6.69713	3.96595	0.236955	2.83208	5.71661	8.21233	2.23884	6.39981	C1
TCGA-G3-A7M5-01	2.70606	3.17201	3.50235	3.09742	2.46538	3.81344	2.29013	3.50074	2.38306	3.95	4.96203	4.34079	6.19828	2.04781	0.262262	0.142712	4.40945	6.42118	2.45889	6.35895	C1
TCGA-WX-AA46-01	2.83586	3.63034	4.39527	3.29732	3.08528	3.91176	3.84147	4.269	3.17515	5.03631	5.19978	5.23427	6.25591	0.0817977	0.808923	0.0873743	5.0879	7.49977	2.74348	6.16683	C1
TCGA-O8-A75V-01	3.50414	2.67509	4.30561	4.72267	2.12599	4.24456	2.70421	3.10614	2.28928	5.18845	4.84949	4.82673	6.72036	2.63667	2.86036	0.633752	4.73922	6.787	1.75577	6.6597	C1
TCGA-BC-A10S-01	2.91489	3.16958	4.8222	4.03658	2.5781	4.42993	3.38626	4.14084	2.09185	5.43785	5.47073	5.08842	6.75386	0.0324635	0.545653	0	4.94555	7.54151	2.36246	6.33364	C1
TCGA-DD-A1ED-01	2.8239	3.17055	4.78197	3.27534	2.56059	4.1692	4.16506	4.14741	2.90519	4.73602	5.16828	5.04849	6.16603	0.101595	1.23476	0.0474896	4.69742	7.3169	2.79102	6.08986	C1
TCGA-CC-A9FS-01	3.77375	3.40274	4.01745	4.93134	2.92131	4.55863	3.2896	3.9264	3.45489	6.36566	5.74701	4.84014	6.92186	1.83059	4.66444	0.35265	5.36114	7.48951	2.35885	5.8421	C1
TCGA-T1-A6J8-01	3.25413	2.23823	3.2858	3.1171	1.84171	4.70906	3.43611	3.43509	2.3536	3.85817	5.27546	5.01784	6.33232	2.35781	4.19685	1.56517	4.80864	7.20502	2.59415	5.61096	C1
TCGA-DD-A73G-01	2.41328	1.74193	3.29186	2.80227	2.75566	3.13735	1.26824	2.65571	1.14121	3.02826	5.0035	4.15054	5.62903	3.51123	1.62135	0.0352193	4.79844	5.71601	1.5448	5.68434	C1
TCGA-KR-A7K7-01	2.78165	2.23955	4.52472	4.36845	2.88916	3.98545	2.8127	3.3058	1.82039	4.78603	5.69825	4.48996	6.20205	4.11242	2.84923	0.148083	5.26063	7.52306	2.08448	6.79265	C1
TCGA-XR-A8TC-01	3.62671	3.28574	4.87739	4.12543	2.44875	4.69235	4.18214	4.36147	3.57821	5.66315	5.48332	4.78751	7.34446	3.37075	3.75027	0.0883394	5.92359	7.86013	2.14282	5.05949	C1
TCGA-ZS-A9CD-01	3.10796	2.46331	5.48835	3.5632	2.63515	4.2202	3.70208	3.6663	2.5532	5.04928	5.79966	5.32858	6.47234	0.275655	2.78094	0.0124497	4.69099	7.3006	2.61337	6.19541	C1
TCGA-2Y-A9GV-01	3.61562	3.81591	4.70965	3.59383	2.88774	4.36761	3.76183	3.9782	3.38184	5.36132	5.51459	5.30945	6.57292	0.0307166	1.88396	0.186739	5.08713	7.44942	3.35672	5.86696	C1
TCGA-BC-A10T-01	3.22968	3.05856	4.4848	3.88663	2.58385	4.17411	3.32357	4.18589	3.9765	5.18097	5.51579	4.66848	6.74698	0.00800985	4.28279	0.0996365	5.53238	7.41316	3.45326	6.76641	C1
TCGA-DD-AAEI-01	2.94444	3.0208	4.28189	4.21286	2.14362	4.33457	2.54048	3.63492	2.58612	5.15575	5.00268	5.17913	6.35198	0	0.178504	0.16937	4.67617	7.23034	2.32187	5.21521	C1
TCGA-FV-A2QQ-01	3.37045	2.62554	4.41027	3.91716	2.53595	4.18205	3.48715	3.65297	2.37598	4.69279	5.21231	4.86602	6.72112	1.60955	2.97017	1.0734	4.71873	7.67462	2.32693	5.58459	C1
TCGA-EP-A2KC-01	3.98387	3.31307	5.11848	4.70175	2.71085	4.484	4.01012	4.39368	3.45274	6.04103	5.56681	5.06273	6.7621	0.0464046	3.32083	0.153094	5.33171	7.73467	3.06314	5.09322	C1
TCGA-DD-A3A3-01	2.69429	2.27285	4.08004	4.35569	1.97378	3.29964	1.73945	2.86763	1.51449	5.23805	4.23402	4.70831	6.31907	1.25471	1.85257	0	4.37764	6.30986	1.60232	7.41889	C1
TCGA-G3-AAV3-01	3.90902	3.72958	3.8123	4.13626	2.92489	4.76422	3.80077	4.19244	2.56338	5.26529	5.40846	5.62704	6.76136	2.15384	1.5606	0.14276	5.42776	7.72317	3.39064	6.21651	C1
TCGA-G3-A3CJ-01	2.39756	2.64546	3.79107	3.1865	2.14443	3.70179	2.20193	3.35593	1.66772	4.39221	4.75603	4.607	5.93744	0	0.0983398	0	4.72928	7.44116	2.12154	6.14717	C1
TCGA-DD-A4NP-01	3.18035	3.42882	4.27088	2.83998	2.58784	3.79793	4.11814	3.6834	2.0625	4.591	5.02122	5.1024	5.79313	0.96411	0.257837	0.0135933	4.55997	7.39114	2.8966	6.70638	C1
TCGA-5R-AA1D-01	3.07984	3.37051	5.09946	3.7399	2.51213	4.29028	4.34815	4.67996	3.26002	5.33582	5.23767	5.9877	6.97065	2.33626	1.36487	0.89318	5.63185	7.84714	3.95158	5.9568	C1
TCGA-DD-AAW2-01	4.10869	3.82552	3.63197	5.1101	2.68423	4.90038	3.64262	4.43101	2.81946	6.19326	5.13208	5.05392	6.78095	3.29444	1.70776	0.431651	5.74472	7.50826	2.80988	6.68703	C1
TCGA-2Y-A9GW-01	4.04667	2.82321	5.02098	4.62499	2.31495	3.98087	4.02834	3.89051	2.77644	5.99982	5.21044	5.03853	6.81756	0.23628	2.7092	0.0966075	5.19179	7.46439	2.61746	6.00228	C1
TCGA-DD-A116-01	3.68781	2.96469	4.51798	4.19154	3.35673	4.33093	2.84471	3.18567	1.66211	4.98281	5.56346	4.25249	6.28526	1.5597	2.97047	0.347372	4.60186	7.29773	1.95081	5.85796	C1
TCGA-G3-AAUZ-01	2.25802	2.47924	4.00388	3.27133	2.25057	3.6419	1.96606	3.13798	1.49017	4.39885	4.81451	4.38981	5.88141	0	0.220034	0.0109783	4.25415	6.80909	1.27836	5.04424	C1
TCGA-DD-AAD2-01	3.61664	2.74783	4.37668	4.55507	2.35358	3.97062	3.99574	4.02787	3.17407	5.57532	4.98935	5.35469	6.7805	0.439732	3.3374	1.07079	5.1864	7.6043	2.78142	5.9309	C1
TCGA-DD-AADR-01	3.20828	3.31691	3.72086	4.05911	2.30395	4.24423	2.41155	3.65348	3.40703	5.05329	5.12805	4.77394	6.84796	0.203977	3.20665	0.842841	4.85598	7.84513	2.38794	6.09099	C1
TCGA-DD-AAVU-01	2.91692	2.14969	3.53805	3.73506	2.37912	4.30952	3.11323	2.84771	1.977	4.38481	5.07537	4.29258	6.50639	0.0295804	2.33672	0.0316361	4.82818	6.77476	1.67134	5.14273	C1
TCGA-DD-AADP-01	3.31868	3.11933	4.04861	4.25079	2.65847	4.67286	4.43991	4.29576	3.26457	5.49508	5.70798	4.67732	6.82981	1.5235	3.71317	0.249332	5.51589	7.38356	2.46474	6.45206	C1
TCGA-2Y-A9H4-01	3.08177	2.94651	4.83295	3.8549	2.42287	4.38129	2.43035	3.70068	3.00661	4.07636	5.22554	5.22958	6.38489	1.2998	1.08238	0.114895	5.37547	7.36753	2.61412	6.64945	C1
TCGA-EP-A26S-01	4.17232	3.94212	5.02752	4.06121	3.04079	4.41631	4.85083	4.90731	3.34399	5.42436	5.70759	5.4959	7.24476	0.00897398	0.979875	0.0286176	5.83769	8.0834	3.3273	6.54426	C1
TCGA-ED-A7XO-01	3.32867	2.44016	4.20921	3.40655	2.53008	4.35339	2.6109	3.93667	3.05867	4.31653	5.63453	5.30418	6.70935	0	1.76445	0.0790979	4.8893	7.82564	2.77606	6.61853	C1
TCGA-DD-AAVP-01	3.67216	3.60717	4.83064	3.51414	3.23467	4.89437	3.40011	3.948	2.33231	4.45905	5.74527	5.6262	6.55089	3.25297	0.572004	0.0204101	5.7855	7.7803	3.1663	6.50563	C1
TCGA-MI-A75C-01	3.87063	3.02558	4.55099	4.18321	2.22411	4.07636	2.8277	3.79274	2.01588	4.46184	5.08521	4.93646	6.89046	0.379875	3.81673	0.503498	4.96861	7.39945	2.15242	6.11283	C1
TCGA-DD-A39W-01	3.82651	4.43885	4.717	4.34685	3.32603	4.65649	5.24957	4.79962	2.85097	5.72166	5.78852	5.76984	7.01695	5.29703	6.41867	0.148504	5.69803	7.98492	3.65393	6.99308	C1
TCGA-DD-AAVY-01	3.93769	3.71946	3.36804	4.54316	2.91054	4.59867	4.04998	4.33952	3.32702	5.73165	5.24523	5.2849	7.05139	0.71893	2.20788	0.220729	5.76465	7.8252	2.85266	6.4747	C1
TCGA-5C-AAPD-01	3.81014	2.46463	4.60619	3.43916	2.92155	3.76172	2.99217	3.29431	1.9644	4.1521	5.53383	4.99875	6.94668	2.23639	3.01104	0.665953	5.34608	7.68686	2.20446	6.44035	C1
TCGA-DD-AAEH-01	2.96616	3.11774	3.79452	3.0317	2.78648	4.54756	3.32543	4.08667	2.64096	4.44589	5.70279	5.68133	6.937	0.0122052	1.58206	0.0260006	5.3763	7.75144	2.00829	6.51629	C1
TCGA-UB-AA0V-01	3.57338	3.60887	4.53415	3.54828	3.07645	4.24982	4.05722	4.54091	3.5063	5.1814	5.42365	5.26548	6.50537	0.263791	1.72935	0.131502	5.10579	7.5056	2.88596	6.43072	C1
TCGA-DD-A118-01	3.04743	4.23373	4.16307	4.08039	3.19326	4.7841	2.75086	4.61101	3.70339	5.74772	6.17283	5.60258	6.94331	2.25991	1.26986	0.207354	5.5436	7.30128	3.13553	6.75102	C2
TCGA-DD-A1EF-01	3.92889	4.07534	5.83728	5.53262	3.54311	4.99162	3.74998	5.12592	3.66817	6.7849	5.95849	5.88312	7.54754	5.22097	5.24029	0.862215	6.16996	8.1977	2.86801	7.3385	C2
TCGA-WJ-A86L-01	3.47444	4.02771	5.37338	3.37961	3.71627	5.35903	3.66221	4.32924	3.33627	6.02887	6.24732	5.71179	6.36229	2.37306	3.21593	1.36159	5.39677	7.4098	2.48362	6.52928	C2
TCGA-CC-5263-01	4.17671	4.13559	6.25243	5.06291	3.96717	5.05708	4.31025	5.47043	2.92188	6.17165	6.59351	6.3189	7.53427	0.57268	5.80266	4.13712	6.32474	8.4372	3.68966	8.24605	C2
TCGA-DD-AAE6-01	4.4906	2.28319	4.38622	3.57218	2.65216	5.16149	2.85363	3.42252	2.20098	4.32478	6.51161	5.0542	6.98929	3.71118	3.89524	1.75014	4.96708	7.80496	2.37357	7.34515	C2
TCGA-DD-A1EL-01	4.07201	3.20945	4.98511	5.10532	3.42963	4.79941	4.33869	4.46534	3.43412	5.65534	5.75585	6.01694	7.14535	5.24293	3.4599	3.24763	6.49102	8.74762	3.44337	5.47204	C2
TCGA-G3-A7M6-01	5.01167	3.72187	5.76319	4.9797	3.58652	5.65496	4.38068	5.93453	3.28282	5.93752	6.9127	6.01813	7.52259	4.71996	4.43447	3.43721	6.61413	8.79431	3.84907	6.39956	C2
TCGA-DD-AACQ-01	3.63666	3.8328	4.76847	3.43718	3.21174	5.09667	2.8635	4.09387	2.50688	5.62679	6.29076	5.81424	6.60325	1.61894	2.27505	0.138519	4.91053	7.08753	1.78443	7.04079	C2
TCGA-G3-A25T-01	3.53632	3.06844	5.25278	3.69357	3.0801	4.81836	3.16012	4.81752	2.71383	5.15597	5.94313	5.98613	7.33804	0.0832797	4.33666	0.0985078	6.49445	8.03465	2.54378	6.21169	C2
TCGA-DD-AADB-01	4.09608	3.25384	5.20148	4.59256	2.60155	5.18244	4.13227	4.72584	2.67331	5.72604	5.9318	5.12788	7.50255	4.60193	5.79057	3.64967	5.97487	8.23586	3.06085	5.96586	C2
TCGA-UB-A7MA-01	3.81005	3.44683	5.6653	2.92689	3.32348	5.40931	3.84687	5.25433	2.882	3.78717	6.33981	5.72881	7.37264	3.64851	4.90811	2.2871	6.62459	8.48926	3.08232	6.86247	C2
TCGA-DD-AAD0-01	3.90436	4.01491	4.08321	4.303	3.25548	4.79782	3.87074	4.8424	2.96877	5.28211	6.48175	5.05911	7.12404	0.0119727	0.132496	0.236802	5.44882	8.02989	3.11646	8.33594	C2
TCGA-BC-4072-01	3.89096	3.61035	5.47475	4.95522	3.07237	4.65293	4.90745	5.41109	4.08186	5.87864	6.09239	5.51788	7.74359	1.97857	4.67604	4.12143	5.95963	8.52469	3.44588	5.84132	C2
TCGA-UB-A7MD-01	3.72102	3.28116	4.75983	4.1625	3.03137	4.09821	3.66374	4.26849	3.2743	5.46141	5.42495	5.7293	6.99034	0.12325	0.500427	0.43295	4.50945	7.76047	3.274	5.4148	C2
TCGA-DD-AACS-01	3.87988	3.1738	4.68607	4.03	3.44529	4.69899	3.33914	4.43136	3.89524	5.07541	6.36378	5.56664	7.33937	1.72191	4.65229	2.04863	5.90896	7.84759	2.50489	7.01721	C2
TCGA-DD-AAEE-01	3.99777	3.97251	3.76138	4.21801	2.89505	5.01092	3.43995	4.19387	3.60542	4.58276	5.38504	5.20375	6.89241	2.92175	2.67307	1.47483	5.3489	8.06882	3.33506	5.52218	C2
TCGA-CC-A7IE-01	3.62482	2.41793	4.84965	4.48209	2.51291	4.23004	3.46041	4.17353	2.4967	5.435	5.54523	5.22153	7.33253	4.81287	6.11425	2.18534	5.88671	7.77499	2.02668	6.17146	C2
TCGA-WX-AA44-01	3.61026	3.65989	5.60937	4.13069	4.32199	5.279	3.33056	4.66747	3.28093	6.34797	6.31747	6.06436	7.15414	2.02678	3.20934	0.190817	5.47117	8.05808	2.78105	6.46586	C2
TCGA-ED-A7XP-01	3.88087	2.79871	4.63877	4.38398	3.29423	4.09931	4.07365	3.90351	3.68309	5.2241	5.48502	5.71681	7.12912	0.334236	3.01844	0.0947381	5.49699	7.8596	3.61764	6.34197	C2
TCGA-BW-A5NQ-01	3.91365	3.97828	6.00297	4.48275	3.14767	5.0972	3.49852	4.7145	3.51345	5.42532	5.84797	6.32116	7.7357	3.95351	0.683295	2.81181	6.51776	9.13562	2.90557	5.56862	C2
TCGA-FV-A3R3-01	2.83488	3.17841	4.61773	3.64208	2.60201	4.23259	4.01631	4.67341	3.13973	4.92782	5.58166	4.75929	6.49264	4.05443	2.53067	0.0237	5.4585	7.6177	3.68804	6.54848	C2
TCGA-DD-AACL-01	4.50137	2.50229	5.0673	3.61827	2.93166	4.93118	2.30499	3.78225	2.34089	4.15866	5.55704	5.77108	7.04839	5.1037	6.05984	1.20731	5.78328	7.94392	1.7641	5.82241	C2
TCGA-DD-A4NJ-01	4.66687	3.33635	5.1868	4.58203	3.31085	4.96817	4.27399	4.9402	4.01651	5.90451	6.07783	5.44487	7.58428	0.359971	1.02748	0.382183	6.17315	8.68045	3.54671	6.06467	C2
TCGA-CC-A5UE-01	3.89981	3.54548	5.13755	4.85892	2.87622	4.47232	2.45189	3.93079	2.73555	4.78158	6.1476	6.17505	6.49097	0.266339	3.70577	3.21257	6.29477	7.6429	2.35716	5.9563	C2
TCGA-CC-A9FW-01	4.19848	3.31517	3.56743	4.43773	2.7281	4.55097	3.60276	4.37434	3.20164	5.54947	6.71892	5.34684	6.4844	5.39669	5.36478	1.64317	5.09137	8.00191	3.00539	7.56097	C2
TCGA-DD-A4NQ-01	4.11347	2.66061	5.24655	4.23583	2.93634	4.16275	2.56729	3.64973	3.39468	5.55981	5.16688	5.51763	6.72147	3.8114	3.24327	2.62574	5.17749	7.90269	2.33017	6.62597	C2
TCGA-RC-A7SH-01	3.67668	2.67015	4.82354	4.25358	3.24426	5.4434	3.34088	3.89549	3.28322	5.65247	6.26572	5.21161	6.9677	0.469789	4.55378	0	5.42757	7.69242	2.03952	7.41038	C2
TCGA-G3-AAV1-01	4.18581	3.69689	4.13695	4.40238	3.08665	4.71649	4.67838	4.45379	4.20631	5.62737	6.23191	5.19516	6.83751	1.62009	3.7087	1.88639	5.5436	7.84425	3.66094	5.9202	C2
TCGA-DD-AA3A-01	3.88866	3.7238	5.58117	4.26284	3.78841	5.04176	3.85341	5.87216	4.37586	5.40513	6.45085	6.63635	7.96522	2.27357	0.814333	0.018331	6.9639	9.067	4.38045	6.72852	C2
TCGA-2Y-A9HA-01	4.31835	3.4361	4.59636	5.23803	3.31237	4.7883	2.98215	4.43652	2.93086	6.06814	5.92542	5.69586	6.72785	3.13085	5.01887	1.16139	5.01688	7.97052	3.79416	6.15585	C2
TCGA-MR-A8JO-01	3.93347	3.25229	5.26021	4.23723	3.24632	4.82987	4.31853	5.00261	3.62161	5.7997	5.64571	6.1426	7.3945	3.14809	1.58186	0.159301	5.91433	7.9357	4.05412	6.44346	C2
TCGA-5R-AA1C-01	4.22563	3.89865	4.2179	4.19679	2.45331	4.78259	3.0837	4.02167	2.81637	5.8251	5.42366	5.63919	7.35526	3.48426	0.178617	0.0519459	5.90346	7.35672	3.30602	6.14051	C2
TCGA-DD-A4NH-01	3.57747	2.85407	4.78664	3.73015	2.64644	4.98206	3.74727	4.37846	3.68306	5.71986	6.30346	5.47059	6.91505	4.03274	4.95305	2.52567	5.84452	8.08108	2.20054	6.03322	C2
TCGA-BC-A10R-01	2.94517	2.56509	4.57028	3.62111	2.58892	4.41818	3.25654	4.65617	2.99249	5.20008	5.81466	5.84231	6.88466	1.02521	3.26943	0.744973	5.10075	7.30009	2.79372	5.75703	C2
TCGA-ED-A459-01	3.25012	2.27942	4.23583	4.2514	2.88598	4.68625	3.07031	3.69226	3.21585	5.12661	5.66095	5.01462	6.66829	1.95486	3.4506	0.375984	5.20238	7.37178	2.50782	5.94853	C2
TCGA-CC-A7IK-01	4.2559	3.43728	5.24366	5.41594	3.85781	4.97765	4.66452	4.58882	3.40285	5.93585	6.03074	6.37144	7.08183	0.07052	0.114505	1.17873	5.90912	8.04222	4.22118	7.16259	C2
TCGA-FV-A4ZQ-01	4.11113	3.85602	5.39093	4.89286	3.44027	4.86701	4.24579	4.77717	3.1646	6.33063	6.23794	5.77817	7.36749	2.36642	5.96965	0.280674	6.29154	8.38328	3.46078	6.88505	C2
TCGA-G3-A25S-01	2.50923	2.06105	3.82818	3.37851	2.81775	4.00519	1.95613	3.49114	2.84878	4.14004	5.88947	5.06456	6.1757	0.30463	3.18041	0.560992	5.4324	7.93617	2.22497	6.00781	C2
TCGA-FV-A23B-01	3.70747	3.93416	4.36261	3.82808	2.65257	5.00998	4.13888	4.93044	3.92606	5.2894	6.3338	4.90836	7.02437	2.59646	5.73359	2.34576	5.86433	7.92875	2.77388	5.73026	C2
TCGA-DD-AADD-01	3.40719	3.668	5.00973	5.12248	3.81568	5.65305	3.25355	4.71622	3.37802	5.97413	6.45935	5.97245	6.75072	6.18556	5.49871	3.78056	6.11436	8.52502	3.95393	7.43493	C2
TCGA-RC-A6M3-01	4.15038	2.53021	5.90357	4.70033	4.36426	4.09951	3.60805	4.80773	3.18501	5.32282	5.4398	6.39391	7.73968	0.681439	3.51375	2.37733	5.9521	8.27634	2.88361	6.31034	C2
TCGA-CC-5260-01	3.74818	4.1747	5.06898	4.92686	3.96036	5.77636	4.65281	5.59808	4.17148	6.13055	6.69778	6.00988	7.88484	0.0775375	5.25865	4.02074	6.85382	8.55823	3.55974	7.1008	C2
TCGA-G3-AAV7-01	3.76301	3.16147	6.16433	4.76764	3.28664	5.65167	3.7803	4.5795	2.96393	5.49682	6.87535	6.5629	7.43416	4.27347	3.80976	3.05162	6.63716	8.82373	2.73145	7.97338	C2
TCGA-DD-A39Y-01	3.56793	2.24057	3.40822	4.83184	3.26088	4.91438	1.97708	3.76367	2.60276	5.28309	5.1159	6.19664	7.33811	1.62233	4.03048	1.40075	5.50981	8.07688	1.9626	6.20772	C2
TCGA-G3-A25Y-01	4.32596	3.21056	4.98123	3.9176	3.0462	5.3833	4.21735	4.71273	3.33464	5.22054	6.23872	5.27411	7.49768	3.65688	3.80468	0.0584038	6.13808	8.38946	2.6477	6.08279	C2
TCGA-DD-A1EG-01	3.10995	2.31934	4.34903	4.32151	2.56915	4.59898	3.40636	3.82195	2.33739	5.53161	5.66942	5.39097	7.01942	1.6004	3.44024	0.131326	5.14239	7.69414	2.88338	5.30044	C2
TCGA-5C-A9VH-01	3.95199	3.39339	4.69252	4.68331	2.39181	4.61673	4.19375	4.38606	2.9101	5.83866	5.46815	4.92419	7.10096	2.6722	4.59576	0.0667814	5.5372	8.1178	2.9353	6.37962	C2
TCGA-BC-A10Q-01	3.25317	3.69509	4.64255	4.14079	3.65208	5.17338	4.81989	5.46653	4.04322	5.56402	6.32589	5.78102	7.60645	0	5.08782	0.493968	6.27604	8.45477	3.81872	7.11836	C2
TCGA-CC-5258-01	4.06078	3.69502	5.09455	5.36993	2.68417	5.24207	3.48789	4.81423	2.49497	6.46864	5.7467	5.60098	7.14658	5.6899	5.22575	4.71126	6.1292	8.1663	2.6869	5.69389	C2
TCGA-G3-A7M9-01	5.82761	3.8004	5.66395	4.85858	3.59988	5.87416	4.91138	5.07558	2.95059	5.53354	6.61331	5.93828	8.29229	5.9599	6.834	3.97797	7.00773	9.07595	3.71952	6.48708	C2
TCGA-DD-A4NB-01	3.12907	3.21249	4.80917	3.79575	2.69965	4.61249	4.85838	4.67597	3.70844	5.74747	5.62486	5.52994	6.57553	1.63742	1.88808	1.35808	5.37609	7.5514	4.19699	6.26473	C2
TCGA-ED-A66X-01	4.15594	3.13412	5.09968	4.85836	2.76642	4.95204	3.85995	4.21545	3.2881	5.6599	5.73923	5.28096	6.96402	3.66911	4.61178	2.82777	5.70957	7.72508	2.59524	6.65314	C2
TCGA-DD-A114-01	4.01711	3.48351	5.09772	4.27381	3.95739	5.38042	4.24862	4.92027	3.28275	5.51048	6.19708	6.38136	7.61484	1.0933	3.73483	3.05728	6.56149	8.19781	3.99866	6.64565	C2
TCGA-XR-A8TG-01	3.56654	2.53056	5.57263	3.84517	3.80335	4.83014	4.32752	5.35496	3.5532	5.37779	5.9575	5.59876	6.96262	1.97026	4.99516	1.85554	5.45654	8.20117	3.20031	5.72117	C2
TCGA-CC-A3MA-01	4.17562	3.66478	5.28732	5.0209	3.52318	5.49622	4.52591	5.92964	4.62436	5.6686	6.55646	5.77359	7.487	0.280048	2.46819	0.0897701	6.83391	8.81844	4.06178	6.72625	C2
TCGA-DD-AADC-01	4.27552	3.40531	5.372	5.16565	3.31317	4.10719	3.50753	4.59378	2.65934	4.8818	5.69458	5.08751	7.36832	4.10018	5.65621	1.96203	6.43793	8.31581	3.83349	6.68477	C2
TCGA-DD-AAD1-01	4.12974	3.88848	5.33209	5.0346	3.29226	5.1127	4.44269	4.98925	3.51114	6.28516	6.03311	5.84892	7.38188	2.04119	4.30532	2.59861	6.12433	7.99618	3.18141	5.80416	C2
TCGA-DD-AAVV-01	3.39539	2.41366	4.99677	4.11618	2.9099	4.30575	3.04273	3.93019	2.94423	5.03236	6.04943	5.26187	6.81056	0.860077	3.24351	0.975624	5.49688	7.51373	2.38473	5.79602	C2
TCGA-ED-A8O5-01	4.27307	3.37053	4.09977	3.98341	2.3218	4.7404	3.98812	4.53579	2.78394	5.27754	6.02228	4.87232	7.03323	4.0682	5.98103	0.25768	6.34384	7.88263	2.44051	5.98414	C2
TCGA-ED-A97K-01	4.14987	3.63942	5.37644	4.52187	3.26323	5.47694	5.23309	5.69945	3.86274	5.94549	6.49186	5.99519	7.02743	2.21488	4.67241	2.66935	6.21825	8.39776	3.60899	6.29167	C2
TCGA-2V-A95S-01	3.86719	3.19119	5.26199	3.79002	2.99994	4.30823	3.23827	4.38145	2.56657	5.43183	5.40114	5.41932	7.11492	0.100192	3.66882	1.22605	5.77442	8.21258	2.28143	5.64201	C2
TCGA-UB-A7MB-01	4.05643	4.25412	5.07263	3.90723	3.30872	5.39518	5.06113	4.8955	2.72579	5.07377	6.15854	5.81664	7.29744	0.112064	2.72732	2.5921	6.20312	8.34504	2.75294	6.79875	C2
TCGA-CC-5264-01	3.88808	3.37351	6.04383	5.08792	3.26276	4.69754	4.10386	4.95879	2.93503	6.12788	6.47028	5.96426	7.52234	4.33351	4.89613	3.7024	6.36475	8.90581	4.05145	7.36062	C2
TCGA-ED-A66Y-01	4.63812	3.78138	4.93438	4.92737	3.48881	4.70137	4.42144	5.10265	3.63496	5.90804	5.96534	5.4643	7.54188	3.6293	3.77927	1.60996	6.52725	8.17142	2.70387	6.74424	C2
TCGA-BC-A8YO-01	4.679	4.50708	5.7961	4.7242	4.42568	5.55083	4.03886	5.36159	3.63955	5.85271	6.28053	6.36799	7.75224	0.761469	3.97786	4.01309	6.87729	8.86811	2.84792	6.24281	C2
TCGA-DD-A4NR-01	3.95101	2.96135	4.87524	3.7803	3.08839	4.65838	3.15721	4.4132	3.64534	4.44375	5.89833	5.63238	6.84963	4.49785	3.43255	2.81954	5.58429	7.73397	2.80707	6.29466	C2
TCGA-CC-A8HU-01	3.92003	2.66238	4.93139	3.48571	3.14548	5.07479	2.51967	4.64535	2.90621	4.28038	6.92297	5.55434	7.14692	3.20205	5.10995	0.431588	6.09298	8.29624	2.19006	6.38092	C2
TCGA-XR-A8TD-01	3.16907	2.89181	5.50972	3.33084	3.02208	4.05253	3.19279	4.26965	3.34096	4.79229	5.97145	5.35822	6.7757	0.0606903	1.86589	0.139029	5.6186	7.96127	2.97445	5.99082	C2
TCGA-DD-A4ND-01	4.41896	3.27399	4.99502	4.21111	2.99392	4.37477	4.46327	4.6355	4.549	5.57314	5.82705	5.33254	6.89962	3.68069	3.92729	3.94421	5.87709	8.22066	3.08667	6.26007	C2
TCGA-ZP-A9D2-01	3.90624	3.35074	5.69787	4.80444	3.45718	4.62298	5.3257	4.7767	3.31472	5.92345	6.48544	6.43564	7.3026	2.70085	3.98692	3.91385	6.23064	8.37895	4.63797	6.04513	C2
TCGA-2Y-A9GX-01	3.81103	3.51372	5.03697	4.12619	3.0035	4.70856	4.80782	4.74977	3.71323	5.38366	6.03687	5.26894	6.99316	0.263531	1.86068	0.188892	5.46536	7.90582	3.43472	6.37348	C2
TCGA-BC-A216-01	4.08458	3.84695	5.05378	3.68887	3.94011	5.48927	5.01384	4.97156	3.72484	5.64396	5.96111	5.48769	7.08785	0.070787	3.53783	2.47298	5.99104	8.54736	2.36912	6.78825	C2
TCGA-CC-A3MB-01	3.85258	3.22657	4.63757	4.48517	2.71615	4.28407	4.09891	4.41716	3.27588	5.35782	6.24495	5.14917	6.83581	2.53561	4.7031	1.79965	5.94382	8.37119	2.9205	6.19697	C2
TCGA-DD-A4NE-01	3.35086	3.6611	4.89626	4.08507	2.8005	4.75339	3.9056	5.0415	3.30641	5.3817	5.60426	5.71083	7.08762	2.22672	3.10698	0.177995	6.34283	8.34835	2.66596	6.92833	C2
TCGA-RC-A6M6-01	4.57356	3.29858	3.79276	5.36647	2.32385	4.53167	3.74974	4.24863	1.95869	4.52522	6.39228	4.69856	7.24082	5.11585	5.88023	3.04958	5.57639	7.67732	2.8527	5.88964	C2
TCGA-CC-A5UD-01	5.00464	3.9036	5.03827	4.17019	3.53206	5.89365	4.4558	4.69748	2.18874	5.31212	6.85339	6.04775	7.70902	2.80108	3.84591	0.0301044	6.40387	8.0816	3.49245	7.36527	C2
TCGA-BC-A10U-01	3.62885	3.54228	4.97672	4.46243	2.92322	4.69657	3.70104	3.82767	2.90335	5.88205	5.86628	5.85156	6.79189	1.4994	1.63001	0.906284	5.39435	7.74035	3.14061	7.5904	C2
TCGA-BC-A10Y-01	4.23165	4.52247	5.06395	3.97048	2.99825	4.60385	3.18838	3.97322	2.98227	4.85065	6.00678	5.08203	6.87615	2.35415	3.04894	0.182878	5.67625	7.55416	2.95745	5.68209	C2
TCGA-CC-A3M9-01	5.04859	3.17389	5.2735	4.51953	3.06152	5.51733	3.6961	4.53487	2.95035	5.25606	6.69383	5.89635	7.7634	5.21664	4.98711	1.36236	6.71007	8.66236	3.47391	7.61063	C2
TCGA-BW-A5NP-01	4.14882	3.36627	4.37301	4.2662	2.66196	4.89483	4.55592	5.16802	3.20471	5.26039	7.2366	5.18888	7.95401	2.96363	5.81964	0.0395333	6.6386	8.14772	2.44773	6.55407	C2
TCGA-G3-AAV4-01	4.34451	4.42971	4.10621	3.68816	3.26491	4.61788	3.73643	4.58485	3.31305	5.20583	5.90957	5.61574	7.27268	0.0264101	0.380837	0	5.75452	8.29792	3.88903	6.87142	C2
TCGA-BC-A10W-01	4.13665	4.01126	5.88921	5.65193	4.00923	5.11889	4.00421	5.07966	4.27034	6.35313	6.31997	5.72984	7.55291	0.681077	3.44332	3.3219	6.05763	8.51852	3.07224	6.5515	C2
TCGA-CC-A8HS-01	5.04984	3.55024	5.54155	4.48563	3.28573	5.38079	4.15671	5.24705	2.89805	5.93941	6.97144	5.62553	7.5534	4.02153	4.76359	2.42379	5.94212	8.3715	2.74775	7.3455	C2
TCGA-DD-A1EE-01	4.46577	4.03998	4.19483	5.58634	3.57929	5.01982	4.348	4.71458	3.78079	6.29737	5.9665	6.12002	7.3829	0.742457	0.679508	0.168244	5.82106	8.00467	3.87737	7.01214	C2
TCGA-FV-A3I1-01	3.75852	2.92053	4.95739	4.29616	3.05628	4.66457	3.14135	4.18841	3.31306	5.38433	5.68614	5.71252	6.65273	4.85569	4.62873	2.48236	5.40754	7.47693	3.20907	6.74442	C2
TCGA-G3-A5SJ-01	4.02251	3.20269	5.65853	4.41975	2.89384	4.21593	3.85604	5.0275	3.0928	4.99853	5.61364	5.86926	7.70487	0.0236531	4.54176	2.53907	6.0949	8.39558	3.16618	6.71437	C2
TCGA-BC-A3KG-01	5.17431	4.16038	5.87174	3.78765	4.40671	5.29179	4.88776	5.4088	4.27317	4.95911	5.93567	6.33229	8.2293	1.78123	4.55217	3.7029	7.00531	9.18892	2.92959	7.42129	C2
TCGA-DD-AAVS-01	3.99835	3.15108	4.14493	4.6735	2.35364	4.9477	4.07277	4.40696	3.23372	5.8498	5.37123	5.02898	7.36164	3.88144	5.9796	0.160358	5.94316	7.78874	2.20408	6.40278	C2
TCGA-FV-A3I0-01	4.42415	3.15737	4.68686	4.32676	2.67384	4.7245	3.52112	5.14562	1.67042	4.31184	5.70465	5.04912	7.78627	1.68576	2.81331	1.44449	6.74491	8.01867	3.03608	6.50422	C2
TCGA-CC-A9FV-01	4.42825	3.42918	5.41091	3.82644	2.89942	5.1061	4.42609	4.8687	3.44132	5.55791	6.0658	6.0183	6.87272	0	3.18754	0.050761	5.67643	8.08015	4.35305	6.83528	C2
TCGA-BC-A217-01	3.54348	3.46747	5.33369	3.26183	3.01405	4.78427	4.2988	4.69417	3.04634	4.10394	5.85207	5.40087	7.22222	0.0184468	3.8731	0.086752	6.66106	8.55015	3.01851	5.75602	C2
TCGA-DD-AAD5-01	3.67411	2.83963	5.39488	5.0467	3.39627	4.92857	3.68244	4.68128	2.46073	4.85792	6.39727	5.96822	7.37867	1.42599	4.65098	1.34608	5.77226	8.51555	2.72711	5.98189	C2
TCGA-2Y-A9H0-01	3.64798	2.53861	4.04047	3.22734	2.34092	4.16168	2.73987	3.96167	2.64642	4.41044	5.5938	5.21963	6.85641	3.9161	3.59565	2.71598	5.54019	7.98867	3.10145	7.42838	C2
TCGA-DD-A1EI-01	3.74017	3.21201	4.57827	4.96708	2.6152	4.85629	3.4196	4.10814	3.15173	5.54904	5.69249	5.46771	6.52952	3.88262	4.25313	1.4265	5.59154	7.86637	2.78698	5.96438	C2
TCGA-LG-A9QC-01	4.488	2.88108	4.94366	3.76434	2.50778	3.68524	4.3508	4.19995	3.73541	5.40515	5.86675	4.77454	7.26741	0.0142559	0.466835	0.0152523	5.82295	8.17064	3.49577	7.17106	C2
TCGA-GJ-A3OU-01	4.02474	3.06137	4.92506	4.72435	2.74543	4.39118	3.64129	4.18787	2.9906	5.93493	5.5955	5.21966	7.05266	1.28897	3.45035	0.505374	5.42926	7.77749	3.0958	6.5742	C2
TCGA-CC-A7IJ-01	4.25491	3.44744	5.78366	4.39732	3.55751	5.31008	3.52038	4.8232	3.20049	4.98768	6.55812	6.06007	7.866	3.72096	5.87989	2.5412	6.60382	9.05175	3.90061	7.55869	C2
TCGA-DD-AACA-01	4.35608	4.02074	4.81179	4.82318	3.43081	5.24692	4.82496	4.84586	3.45767	6.11367	6.05321	5.09759	6.95212	0.136806	0.0579758	0.204243	6.02634	8.03282	4.06727	6.46697	C2
TCGA-2Y-A9GS-01	4.08776	3.31912	5.31242	4.58801	3.44635	5.41828	3.73617	4.50146	3.76208	5.42653	6.22891	6.17514	7.20334	2.41492	3.60812	0.398441	5.86276	8.36935	3.43059	6.10907	C2
TCGA-DD-AACW-01	4.38445	3.08703	4.15247	3.95784	2.24552	4.97987	3.48731	4.18442	2.82087	4.94074	5.46734	4.73069	7.29623	4.30353	7.29575	0.0253134	5.96448	8.05096	2.51715	6.90587	C2
TCGA-FV-A3R2-01	3.5987	3.34323	4.40571	4.36066	2.89183	5.53278	3.40357	4.5367	4.0842	5.66874	6.40584	5.61075	6.75964	0.0494609	4.7219	0.326348	5.2935	7.92089	2.60385	7.17328	C2
TCGA-5C-A9VG-01	4.39622	3.27758	5.03498	4.27718	2.98877	4.65724	4.04301	4.50814	3.59516	5.61243	6.02972	5.63842	7.43093	6.32358	3.46653	3.36355	6.30427	8.69361	3.56719	7.16714	C2
TCGA-ZP-A9CZ-01	3.55189	3.36702	4.94381	3.59446	2.80096	4.9038	3.14361	4.34044	3.29687	3.85345	5.80091	5.08082	6.81278	2.17546	3.70679	1.69544	5.58589	7.98597	2.64448	6.72511	C2
TCGA-DD-A1EJ-01	4.31533	3.40379	4.80452	4.05498	2.40841	5.28371	4.17538	4.61362	3.16226	4.05302	5.9556	4.98548	7.46961	4.10767	6.10678	3.63098	5.86694	8.15333	2.95	5.98577	C2
TCGA-DD-AACU-01	3.61441	3.41863	4.66443	4.46443	2.37315	5.0543	3.23873	4.02652	3.09706	5.02551	5.79007	5.70037	6.75884	4.13022	5.01667	2.47328	5.29985	7.5759	2.69053	6.96486	C2
TCGA-2Y-A9H2-01	4.84474	3.61238	5.2715	4.82448	4.46709	5.49747	4.48766	5.52361	4.29579	6.11462	6.62011	5.94776	8.27756	2.20219	3.49989	0.0319765	6.81033	8.91029	3.72206	6.43126	C2
TCGA-CC-5261-01	4.82269	4.00484	5.46842	4.77512	3.48523	5.82099	4.64344	5.71378	4.00938	5.36417	7.16091	5.94609	7.80908	2.4023	4.68076	0.20319	6.66536	7.95194	3.57611	6.36002	C2
TCGA-EP-A3RK-01	3.56983	3.07491	4.42095	4.31606	2.94731	4.59364	2.7495	4.31257	3.04065	5.21742	5.65724	4.92306	6.6426	2.25372	0.181455	0.237508	5.29254	7.9478	3.00145	6.4675	C2
TCGA-BC-A112-01	3.26287	3.36734	5.67263	4.5805	3.9186	5.69213	4.47438	5.13264	3.88813	5.7297	6.47581	5.98061	8.04855	3.05339	3.28471	4.61417	7.04217	8.33713	2.68733	6.39829	C2
TCGA-DD-AACX-01	4.17118	3.73548	4.928	3.16072	3.14547	4.97876	3.99081	4.42368	3.36677	5.06644	6.00709	5.9379	7.23624	0.0604727	0.0695794	2.08533	5.78662	7.96044	3.4025	5.76599	C2
TCGA-DD-A4NN-01	4.22311	3.10957	4.23	4.3349	2.60188	5.57634	3.27333	4.37471	3.24763	4.87394	6.49728	5.30187	7.35658	2.79975	4.36222	0.0103086	6.27444	7.60366	2.3831	6.90255	C2
TCGA-DD-AACZ-01	4.13654	3.31003	5.36871	5.16409	3.5308	4.65174	3.33661	4.48431	3.2045	4.68965	5.71086	6.08285	7.15694	5.84742	5.11831	4.91666	6.37987	8.45794	2.03377	6.06871	C2
TCGA-DD-AAE0-01	3.65782	2.56797	5.37006	4.29348	2.95217	5.12967	2.61243	4.52922	2.76637	4.62023	6.65135	5.17771	7.00428	4.73878	6.00362	0.083142	5.94354	8.29198	2.45181	6.30239	C2
TCGA-YA-A8S7-01	4.70412	2.83615	5.92006	4.49323	3.21105	5.05544	3.44421	4.51486	2.96166	5.88006	6.26905	5.90284	7.34502	0.119165	0.666571	2.40083	6.04307	8.2224	3.73837	6.13758	C2
TCGA-2Y-A9GY-01	3.82151	2.89416	5.32619	4.26733	2.88855	4.61521	2.66757	4.19722	3.08059	4.75979	5.85609	5.5906	7.25841	5.5117	4.65466	2.12692	5.8276	7.99875	2.25534	6.05065	C2
TCGA-ED-A8O6-01	4.03967	3.21967	4.57067	5.12088	2.52304	5.57216	3.52137	4.54593	1.95906	5.20153	6.10106	5.4038	6.75843	4.28113	4.13832	3.30461	5.32168	7.58242	1.84131	6.27724	C2
TCGA-ZP-A9D4-01	4.01854	4.04019	4.94202	4.87114	3.05382	4.64061	3.85485	4.69623	4.11424	6.17151	5.78415	5.68216	7.10735	0.0114489	0.280459	0.140551	5.85899	7.79614	3.11639	5.82627	C2
TCGA-DD-A1EH-01	3.78642	3.56272	4.4333	4.67823	2.90368	5.11228	4.96051	5.43608	3.47233	6.04107	6.13235	5.21416	7.65205	3.2665	4.33941	0.191937	6.28005	8.13027	3.06215	6.88557	C2
TCGA-BC-A10Z-01	3.73011	3.05335	5.09808	4.32142	2.97288	4.57088	3.41545	4.22509	4.0371	5.45439	5.74554	5.70753	6.83046	3.68827	6.04132	0.0912098	5.6111	7.88919	2.56352	6.64696	C2
TCGA-ED-A7PX-01	4.04004	3.13571	5.06319	4.26563	3.22778	5.45028	4.9224	5.35646	3.84408	5.70484	6.59969	6.49083	7.94501	2.43852	3.95387	4.14654	6.30407	9.00854	3.65898	6.39773	C2
TCGA-CC-A8HV-01	4.95373	3.09546	5.43741	4.26285	3.97413	5.03794	3.11711	4.3591	3.4749	4.28901	6.11396	5.94524	7.3431	5.15758	5.81725	0.46309	6.30236	8.36307	2.46935	5.83305	C2
TCGA-GJ-A9DB-01	3.76409	3.48278	5.28941	3.9385	3.08524	4.95571	4.31767	4.43525	3.79287	5.17982	5.88607	5.71441	6.72042	0.708557	3.33653	0.372629	5.57868	8.1115	3.34882	6.77396	C2
TCGA-MI-A75I-01	3.48531	3.1965	4.25269	4.50682	2.97063	4.79716	2.97107	3.83978	3.03253	6.14156	5.65649	5.78476	6.56145	0.00973207	3.12242	0.0613819	4.97643	7.23524	2.16486	5.57694	C2
TCGA-CC-A5UC-01	4.25124	3.35011	4.71052	3.96833	2.65321	5.02367	2.91302	4.28802	2.51543	4.93695	5.81842	5.53671	7.05257	4.03648	5.05626	2.43766	5.7733	7.99465	2.29632	5.80525	C2
TCGA-DD-AACK-01	3.65496	3.70865	4.88033	3.64782	2.70539	4.28027	3.67753	4.33094	3.50225	5.21316	5.3604	4.94754	7.06529	0.183416	0.109491	2.91961	5.3808	7.98116	3.25146	6.18562	C2
TCGA-DD-AADL-01	4.35131	3.4088	4.16093	4.49255	2.8343	5.09081	3.28581	3.98434	3.85339	5.58873	5.78272	5.82918	6.56393	2.58265	4.53976	2.24521	5.33106	7.76678	3.03346	6.30318	C2
TCGA-UB-A7MC-01	4.23922	2.52471	5.8656	4.74343	3.64098	4.19591	2.94477	4.63509	3.72658	5.66484	6.06055	5.24482	7.19539	0	3.80136	0.138043	6.06067	8.08629	3.97254	6.1587	C2
TCGA-ED-A82E-01	4.43026	4.26158	5.12878	3.94844	3.1594	4.81422	4.98088	5.86347	3.72127	5.60634	6.4567	5.86857	7.55115	0.0879039	2.82237	0.171301	7.14033	8.55343	4.31936	6.42607	C2
TCGA-UB-AA0U-01	4.12701	3.91787	4.71412	4.72546	3.42759	4.82931	3.5321	4.87126	3.48489	6.05575	6.06175	5.31067	7.05147	0.0245125	4.41992	0.16248	5.53166	7.97239	3.09095	6.2889	C2
TCGA-CC-A9FU-01	3.90475	3.25698	5.17781	4.49342	3.4297	5.31142	3.11055	4.4118	2.77461	5.46028	6.69666	5.25926	7.30723	5.86877	5.64743	3.42517	6.19429	8.08179	3.45504	7.08432	C2
TCGA-DD-AADW-01	4.4656	3.97749	5.3901	3.8799	3.01358	5.83564	4.15958	5.50319	3.24748	5.74426	6.28978	5.34499	7.37681	1.8276	3.40071	0.110799	6.8263	8.66631	3.10956	6.28864	C2
TCGA-DD-AACB-01	3.90894	2.84487	4.59668	4.85442	3.36218	4.90103	2.99865	3.9698	1.80217	5.22583	5.8608	5.61122	7.27745	4.17859	3.94567	0.147122	5.61626	7.43545	2.98811	7.46525	C2
TCGA-DD-AACP-01	3.94076	3.25272	4.63838	4.28371	3.37705	5.56855	3.63034	4.5263	2.40864	3.89564	6.12785	5.64542	7.4412	5.86792	5.84627	1.09255	6.76595	8.14085	2.39843	6.88898	C2
TCGA-DD-A4NS-01	4.23194	3.74586	4.97652	4.33207	3.49431	4.83895	4.48004	5.12704	3.74224	5.94076	5.75481	5.7161	6.87368	0.0361769	3.90567	1.0105	5.94452	7.84961	3.43849	6.75843	C2
TCGA-DD-AACH-01	4.52705	3.96944	4.6349	4.6809	3.86285	5.50963	4.06019	5.05842	3.67579	5.2074	6.38978	6.58605	7.60033	0.456528	3.12821	3.37654	6.01793	8.78581	2.61619	6.04793	C2
TCGA-DD-AACN-01	3.94082	3.27182	5.42574	4.55943	2.97882	5.1337	4.17075	4.74576	3.70159	5.94312	5.83354	5.5273	7.12424	2.4641	4.7448	0.0948651	6.26267	7.8758	2.90469	6.81835	C2
TCGA-PD-A5DF-01	3.52439	3.37784	5.48452	3.73937	3.19217	4.61201	3.49493	4.42532	3.17799	4.98526	6.04964	5.89391	7.09759	0.0564394	1.66192	0.0484587	5.48876	8.16887	3.13902	5.5851	C2
TCGA-CC-A7IG-01	3.83662	2.14337	4.78457	4.04556	2.79258	5.4552	2.24807	3.57002	2.05754	4.34122	5.3353	5.33527	7.09641	3.19202	4.09424	0.0288007	5.79949	7.47493	1.72923	6.1227	C2
TCGA-4R-AA8I-01	4.29062	4.22666	4.17618	4.20334	3.0755	4.39251	3.93357	4.71387	3.33474	5.6729	5.71814	5.9634	7.16464	0.265938	1.49729	0.79788	5.32289	7.76626	3.58743	6.73237	C2
TCGA-DD-A4NG-01	4.09404	4.50295	4.49843	4.8105	3.02805	4.74552	3.36645	4.95073	3.78127	6.42422	6.48103	5.12293	7.14005	1.65644	3.07612	0.0313091	5.72137	8.03114	3.30007	7.07195	C2
TCGA-ED-A5KG-01	4.46966	4.01165	5.53257	4.41898	3.40947	4.75442	4.94725	5.67698	3.95229	5.60262	6.08226	5.73084	7.95764	3.79692	4.9176	3.10481	6.70918	8.63404	3.31501	6.54491	C2
TCGA-CC-A1HT-01	3.96481	3.73002	5.84981	5.3399	3.86666	5.85805	4.09247	5.66576	3.48756	5.99519	6.40558	6.40164	7.77886	3.58497	3.68063	3.22883	6.6539	9.02852	3.89372	6.2931	C2
TCGA-DD-AAC8-01	4.52069	3.73152	4.41429	3.79643	2.9436	4.8587	3.40608	4.54004	3.14045	5.53476	6.04941	5.25922	7.17762	4.24312	0.365436	0.0229539	6.45502	8.06863	3.56963	6.9544	C2
TCGA-BD-A3EP-01	4.40477	2.69407	5.14538	3.98047	2.70931	4.44478	3.8985	4.21501	2.93096	4.69008	5.75534	5.43588	6.98669	0.787763	2.86714	1.94726	5.39803	7.76415	2.63513	5.82826	C2
TCGA-QA-A7B7-01	4.43931	4.74816	4.97192	3.35827	3.73954	5.5617	3.86014	4.78604	3.65537	4.30458	5.60013	6.13748	7.37818	3.22022	3.79384	3.42192	5.83459	8.4853	2.70084	5.98978	C2
TCGA-DD-A1EA-01	4.11225	4.08783	5.13489	4.77417	3.25087	4.94903	4.6727	4.75929	4.40184	5.98265	5.68341	5.86429	6.9237	4.59519	0.430621	3.20616	6.01745	7.97459	4.19412	5.99904	C2
TCGA-CC-A3MC-01	3.49006	3.22505	3.90338	4.44807	2.87985	4.75247	3.23644	4.16766	3.36779	5.62741	5.74886	5.61905	6.89726	1.41308	2.6489	1.79114	5.30367	7.93836	2.08076	5.52064	C2
TCGA-FV-A2QR-01	3.44283	3.33343	3.60694	3.2908	2.5511	4.57788	3.59885	4.05347	2.63809	5.09148	5.66589	5.61527	6.8098	0.151757	1.8997	0	5.11124	7.33185	2.748	6.14714	C2
TCGA-K7-AAU7-01	4.43885	3.78118	6.04627	5.12065	3.48125	5.26658	4.44497	5.50024	3.62307	6.26828	6.11515	6.37801	7.81303	2.679	5.8864	3.2082	6.27234	8.61806	3.42994	6.24737	C2
TCGA-G3-AAV6-01	3.84326	3.27019	4.49438	3.80905	1.86045	4.48369	3.40993	4.60011	1.57723	4.68717	5.94216	4.35818	7.45045	3.58207	5.34061	1.0152	6.15033	7.86253	3.02374	6.46892	C2
TCGA-CC-A8HT-01	3.8206	3.72142	4.32552	4.6986	3.60692	5.05644	3.98113	4.58753	3.73923	5.74846	6.14248	6.19587	7.22442	4.07806	4.77717	3.32247	5.83661	9.26902	2.3445	6.3863	C2
TCGA-RG-A7D4-01	3.92953	3.36234	5.53758	5.05903	2.78669	4.72391	3.00144	4.47735	3.30143	5.38953	5.86039	5.15372	6.90872	5.46563	4.22068	1.47431	6.29214	8.22275	2.60873	5.75864	C2
TCGA-DD-AAE9-01	4.32748	3.19319	3.05332	4.27018	2.72859	4.53976	2.65152	3.60603	2.0583	5.44229	5.6126	5.14242	6.49447	4.02303	0.0760862	0	4.898	7.69178	2.28081	6.96892	C2
TCGA-DD-A4NA-01	4.09219	4.05854	5.22954	3.92246	4.01661	4.83424	4.43262	5.54033	4.29536	5.71315	6.82866	5.65338	7.40459	0.0610865	4.479	1.46899	6.36774	8.59195	3.7964	6.38328	C2
TCGA-DD-A1EC-01	3.56284	3.88351	5.45734	4.21961	3.1691	5.31493	4.49284	5.36674	3.76496	6.03343	6.10528	6.05158	7.13565	0.00941542	0.682222	0.602711	5.79313	8.03564	3.62084	7.09822	C2
TCGA-BC-4073-01	3.4644	3.4305	5.44025	4.13799	3.4991	4.59384	4.10972	5.00703	3.49119	5.67853	6.00515	6.04147	7.27018	0.0343572	5.13103	3.32036	6.27945	8.17769	3.56668	5.82943	C2
TCGA-WQ-A9G7-01	3.5772	2.61781	4.772	3.74816	2.72311	4.97034	3.40273	3.87831	2.72951	5.45017	6.16261	5.38228	6.69124	0.426334	2.81081	0.017024	5.3946	8.09699	1.80786	6.57171	C2
TCGA-CC-A7II-01	4.68685	2.57998	5.38601	4.06156	3.32697	5.40749	3.51101	4.44981	2.46302	4.6849	6.41912	6.227	7.97971	5.70689	5.3017	1.22393	6.91779	8.47628	2.72256	5.66569	C2
TCGA-GJ-A6C0-01	3.24078	3.16052	4.97803	3.30328	2.71494	4.30771	3.68012	4.26604	2.79272	4.78127	5.62521	5.2062	6.67041	0.0274887	0.590483	1.58023	5.04111	7.47182	2.68912	6.03233	C2
Pvalue	1.23912e-31	3.62785e-08	3.52615e-26	4.53149e-19	2.82383e-20	4.53452e-37	0.000502972	2.08547e-29	2.86062e-14	1.08638e-14	3.1953e-39	2.65196e-27	5.43449e-35	2.44855e-11	1.20829e-15	4.3297e-17	3.50123e-38	3.11331e-37	1.56706e-09	2.85922e-09	NA
