# Supplementary material for: A Mitophagy-Related Gene Signature for Subtype Identification and Prognosis Prediction of Hepatocellular Carcinoma
Source: Int J Mol Sci. 2022 Oct 12;23(20):12123. doi: 10.3390/ijms232012123 (PMC9603050; doi:10.3390/ijms232012123)
Supplement: Supplementary file 1 [file ijms-23-12123-s001.zip › Table S6.xlsx]

## Sheet: Table S6
Table S6 A prognostic model construction in the TCGA-HCC Cohort.

## Sheet: Table S6_!
Table S6_1 protein–protein interactions (PPI) networks of mitophagy-related genes.
#node1	node2	node1_string_id	node2_string_id	neighborhood_on_chromosome	gene_fusion	phylogenetic_cooccurrence	homology	coexpression	experimentally_determined_interaction	database_annotated	automated_textmining	combined_score
ATF4	SQSTM1	9606.ENSP00000336790	9606.ENSP00000374455	0	0	0	0	0.062	0	0	0.39	0.403
ATF4	HIF1A	9606.ENSP00000336790	9606.ENSP00000437955	0	0	0	0	0	0.182	0	0.442	0.524
ATG9A	RAB7A	9606.ENSP00000386710	9606.ENSP00000265062	0	0	0	0	0	0.251	0	0.82	0.86
ATG9A	GABARAPL1	9606.ENSP00000386710	9606.ENSP00000266458	0	0	0	0	0.088	0.165	0	0.771	0.811
ATG9A	OPTN	9606.ENSP00000386710	9606.ENSP00000368022	0	0	0	0	0	0	0	0.519	0.519
ATG9A	SQSTM1	9606.ENSP00000386710	9606.ENSP00000374455	0	0	0	0	0.065	0.187	0	0.676	0.732
CSNK2A1	RELA	9606.ENSP00000217244	9606.ENSP00000384273	0	0	0	0	0.052	0.27	0	0.23	0.421
CSNK2A1	SRC	9606.ENSP00000217244	9606.ENSP00000362680	0	0	0	0.568	0.062	0.368	0	0.353	0.469
CSNK2A1	SQSTM1	9606.ENSP00000217244	9606.ENSP00000374455	0	0	0	0	0	0.529	0	0.093	0.555
CSNK2A1	CSNK2A3	9606.ENSP00000217244	9606.ENSP00000473553	0	0	0.449	0.987	0	0	0.8	0.194	0.801
CSNK2A1	FUNDC1	9606.ENSP00000217244	9606.ENSP00000367284	0	0	0	0	0	0	0.9	0.067	0.902
CSNK2A1	CSNK2A2	9606.ENSP00000217244	9606.ENSP00000262506	0	0	0.442	0.981	0.062	0.885	0.8	0.609	0.976
CSNK2A2	NRAS	9606.ENSP00000262506	9606.ENSP00000358548	0	0	0	0	0.078	0.057	0	0.368	0.402
CSNK2A2	RELA	9606.ENSP00000262506	9606.ENSP00000384273	0	0	0	0	0.092	0.27	0	0.264	0.47
CSNK2A2	CSNK2A3	9606.ENSP00000262506	9606.ENSP00000473553	0	0	0.443	0.981	0	0	0.8	0.26	0.802
CSNK2A2	FUNDC1	9606.ENSP00000262506	9606.ENSP00000367284	0	0	0	0	0	0	0.9	0.208	0.917
CSNK2A3	FUNDC1	9606.ENSP00000473553	9606.ENSP00000367284	0	0	0	0	0	0	0.8	0.067	0.805
E2F1	HRAS	9606.ENSP00000345571	9606.ENSP00000407586	0	0	0	0	0.076	0	0	0.428	0.449
E2F1	HIF1A	9606.ENSP00000345571	9606.ENSP00000437955	0	0	0	0	0	0.057	0	0.627	0.634
FUNDC1	GABARAPL1	9606.ENSP00000367284	9606.ENSP00000266458	0	0	0	0	0.053	0.117	0.8	0.617	0.927
FUNDC1	SRC	9606.ENSP00000367284	9606.ENSP00000362680	0	0	0	0	0	0	0.9	0.286	0.925
FUNDC1	MFN1	9606.ENSP00000367284	9606.ENSP00000420617	0	0	0	0	0	0	0	0.609	0.609
FUNDC1	OPTN	9606.ENSP00000367284	9606.ENSP00000368022	0	0	0	0	0.062	0	0	0.677	0.684
FUNDC1	SQSTM1	9606.ENSP00000367284	9606.ENSP00000374455	0	0	0	0	0	0.273	0	0.601	0.697
FUNDC1	PGAM5	9606.ENSP00000367284	9606.ENSP00000438465	0	0	0	0	0.062	0	0.9	0.884	0.988
GABARAPL1	RAB7A	9606.ENSP00000266458	9606.ENSP00000265062	0	0	0	0	0.183	0.127	0	0.792	0.839
GABARAPL1	PGAM5	9606.ENSP00000266458	9606.ENSP00000438465	0	0	0	0	0.065	0	0	0.468	0.482
GABARAPL1	TFE3	9606.ENSP00000266458	9606.ENSP00000314129	0	0	0	0	0.069	0	0	0.481	0.496
GABARAPL1	MFN1	9606.ENSP00000266458	9606.ENSP00000420617	0	0	0	0	0.103	0.105	0	0.457	0.526
GABARAPL1	OPTN	9606.ENSP00000266458	9606.ENSP00000368022	0	0	0	0	0.062	0.415	0.8	0.661	0.957
GABARAPL1	SQSTM1	9606.ENSP00000266458	9606.ENSP00000374455	0	0	0	0	0.071	0.87	0.8	0.947	0.998
HIF1A	TFE3	9606.ENSP00000437955	9606.ENSP00000314129	0	0	0	0	0.062	0.106	0	0.407	0.459
HIF1A	SRC	9606.ENSP00000437955	9606.ENSP00000362680	0	0	0	0	0.062	0.685	0	0.676	0.896
HIF1A	SQSTM1	9606.ENSP00000437955	9606.ENSP00000374455	0	0	0	0	0	0.27	0	0.538	0.648
HIF1A	RELA	9606.ENSP00000437955	9606.ENSP00000384273	0	0	0	0	0	0.27	0	0.89	0.916
HIF1A	HRAS	9606.ENSP00000437955	9606.ENSP00000407586	0	0	0	0	0	0	0	0.65	0.65
HRAS	NRAS	9606.ENSP00000407586	9606.ENSP00000358548	0	0	0.448	0.981	0	0.877	0.9	0.758	0.987
HRAS	SRC	9606.ENSP00000407586	9606.ENSP00000362680	0	0	0	0	0.105	0.668	0.9	0.89	0.996
HRAS	RELA	9606.ENSP00000407586	9606.ENSP00000384273	0	0	0	0	0	0	0.65	0.425	0.79
MFN1	RHOT2	9606.ENSP00000420617	9606.ENSP00000321971	0	0	0	0	0.08	0.155	0	0.752	0.791
MFN1	OPTN	9606.ENSP00000420617	9606.ENSP00000368022	0	0	0	0	0	0	0	0.469	0.469
MFN1	SQSTM1	9606.ENSP00000420617	9606.ENSP00000374455	0	0	0	0	0.062	0	0.8	0.572	0.912
MFN1	PGAM5	9606.ENSP00000420617	9606.ENSP00000438465	0	0	0	0	0.088	0.078	0	0.512	0.554
NRAS	RELA	9606.ENSP00000358548	9606.ENSP00000384273	0	0	0	0	0	0	0.65	0.17	0.697
NRAS	SRC	9606.ENSP00000358548	9606.ENSP00000362680	0	0	0	0	0.083	0.465	0.9	0.501	0.972
OPTN	RAB7A	9606.ENSP00000368022	9606.ENSP00000265062	0	0	0	0	0	0.131	0	0.516	0.561
OPTN	SQSTM1	9606.ENSP00000368022	9606.ENSP00000374455	0	0	0	0	0.083	0.436	0	0.96	0.978
PGAM5	RHOT2	9606.ENSP00000438465	9606.ENSP00000321971	0	0	0	0	0.068	0	0	0.395	0.413
PGAM5	SQSTM1	9606.ENSP00000438465	9606.ENSP00000374455	0	0	0	0	0	0	0	0.429	0.429
RAB7A	SRC	9606.ENSP00000265062	9606.ENSP00000362680	0	0	0	0	0.064	0.098	0	0.418	0.466
RAB7A	SQSTM1	9606.ENSP00000265062	9606.ENSP00000374455	0	0	0	0	0.064	0	0	0.643	0.651
RELA	SRC	9606.ENSP00000384273	9606.ENSP00000362680	0	0	0	0	0.063	0.056	0.9	0.423	0.942
RELA	SQSTM1	9606.ENSP00000384273	9606.ENSP00000374455	0	0	0	0	0.065	0.118	0.9	0.324	0.936
RRAS2	SRC	9606.ENSP00000256196	9606.ENSP00000362680	0	0	0	0	0.065	0.31	0	0.236	0.464
SQSTM1	TFE3	9606.ENSP00000374455	9606.ENSP00000314129	0	0	0	0	0.069	0	0	0.416	0.433
SQSTM1	SRC	9606.ENSP00000374455	9606.ENSP00000362680	0	0	0	0	0.061	0.104	0	0.386	0.438

## Sheet: Table S6_2
Table S6_2 Riskscores of HCC subgroups.
Patients	Times	Status	GABARAPL1	SQSTM1	PGAM5	ATG9A	Risk	RiskScore
TCGA-G3-AAV0-01	1.30411	0	4.24709	5.33128	4.16006	4.9492	Low_risk	4.51894
TCGA-DD-AAE3-01	1.55068	0	6.28765	8.10953	3.59075	3.64912	Low_risk	3.98336
TCGA-DD-A118-01	9.41644	0	7.63302	7.0564	5.68176	5.53515	Low_risk	5.12104
TCGA-DD-A1EF-01	1.07945	1	4.48407	7.4729	5.83755	5.50648	High_risk	5.87727
TCGA-DD-A11D-01	4.27397	1	6.46595	9.06577	4.60055	5.2257	High_risk	5.35263
TCGA-G3-A6UC-01	1.83836	0	7.76867	7.56865	4.74089	5.3545	Low_risk	4.82275
TCGA-WJ-A86L-01	0.945205	0	5.40347	7.49534	5.83221	6.47301	High_risk	6.20561
TCGA-CC-5263-01	0.353425	1	3.94616	8.75318	5.9143	5.82559	High_risk	6.50704
TCGA-DD-AAE6-01	0.386301	0	3.77426	7.81252	5.69932	6.04321	High_risk	6.33689
TCGA-K7-A6G5-01	1.40274	0	5.60074	7.76052	5.29607	4.80616	Low_risk	5.19215
TCGA-DD-A1EL-01	1.13699	1	6.11174	9.91247	4.8948	5.33977	High_risk	5.79907
TCGA-G3-A7M6-01	1.73151	0	5.05823	7.13313	5.32848	6.22739	High_risk	5.88347
TCGA-DD-AAE4-01	1.66575	0	6.62268	5.23036	4.00637	3.84815	Low_risk	3.4083
TCGA-MI-A75G-01	1.91233	0	6.04551	7.90789	4.73827	5.2664	Low_risk	5.19886
TCGA-DD-AACQ-01	1.18356	1	5.16032	7.87784	5.2712	5.78309	High_risk	5.80797
TCGA-DD-AADV-01	1.5726	0	6.05076	8.50415	5.00846	5.07588	High_risk	5.34386
TCGA-LG-A9QD-01	1.00274	0	6.98723	6.8183	4.96151	4.12624	Low_risk	4.21294
TCGA-G3-A25T-01	4.25479	0	6.97741	6.63806	5.94379	4.93155	Low_risk	4.912
TCGA-DD-AADB-01	3.40274	0	3.31285	7.3957	5.94501	5.99228	High_risk	6.37255
TCGA-UB-A7MA-01	2.32329	0	4.38929	8.38836	5.14791	5.85896	High_risk	6.08935
TCGA-DD-AAD0-01	0.375342	0	5.99993	8.41288	5.23082	5.09221	High_risk	5.41206
TCGA-BC-4072-01	4.08219	1	8.14512	7.68839	5.00332	6.0299	Low_risk	5.21912
TCGA-DD-AACD-01	1.04384	1	4.94445	6.07157	4.99023	3.54444	Low_risk	4.12135
TCGA-DD-AAE7-01	1.76438	0	6.05272	6.20058	4.59263	3.92907	Low_risk	4.00832
TCGA-DD-AADJ-01	2.92055	0	6.23121	6.36261	4.56534	5.15491	Low_risk	4.64438
TCGA-UB-A7MD-01	0.142466	1	6.9329	10.0487	5.33383	5.14258	High_risk	5.71822
TCGA-CC-5259-01	0.684932	0	3.80882	6.58353	4.12133	4.37651	Low_risk	4.62007
TCGA-HP-A5MZ-01	0.249315	1	5.71757	8.91943	4.95222	4.53349	Low_risk	5.21617
TCGA-DD-AACS-01	4.94247	0	6.07358	8.67712	5.19167	5.63858	High_risk	5.73786
TCGA-DD-A39X-01	4.6411	1	5.1292	8.8071	4.24946	5.19539	High_risk	5.41238
TCGA-DD-AAEE-01	2.21918	0	6.31543	10.0829	5.33392	5.15374	High_risk	5.85276
TCGA-2Y-A9GU-01	5.31233	0	6.7374	6.61637	5.16909	4.46522	Low_risk	4.45376
TCGA-CC-A7IE-01	0.594521	1	4.52722	7.80465	5.5597	5.35464	High_risk	5.78446
TCGA-WX-AA44-01	1.68493	0	5.57834	8.0139	5.47643	5.69506	High_risk	5.78459
TCGA-G3-A7M8-01	1.17808	0	7.00392	6.43325	5.28969	4.89125	Low_risk	4.61577
TCGA-ED-A7XP-01	1.09589	0	5.842	10.7496	5.27468	4.79037	High_risk	5.90998
TCGA-BW-A5NQ-01	0	0	6.35834	10.0993	5.5427	5.36541	High_risk	6.02794
TCGA-DD-A3A5-01	8.56164	1	5.73402	8.42926	4.42089	4.91241	Low_risk	5.10611
TCGA-DD-AADM-01	0.0328767	1	5.02401	8.14704	3.78118	4.54092	Low_risk	4.7651
TCGA-FV-A3R3-01	1.00274	1	7.27607	7.20507	5.53299	5.14223	Low_risk	4.97547
TCGA-DD-AACL-01	0.293151	1	5.32733	8.79517	5.80401	5.29487	High_risk	5.93755
TCGA-DD-A4NJ-01	2.54247	0	5.10032	8.59715	4.58977	4.47335	Low_risk	5.10048
TCGA-DD-AADU-01	1.51781	0	6.51512	8.86769	4.39064	4.23453	Low_risk	4.70646
TCGA-CC-A7IF-01	1.77808	1	5.79663	7.29452	4.91599	4.81988	Low_risk	4.91378
TCGA-CC-A5UE-01	0.745205	1	4.99488	10.0319	5.89948	6.11936	High_risk	6.7851
TCGA-DD-AAVW-01	6.34795	0	5.37798	8.53045	4.90427	4.81061	High_risk	5.30878
TCGA-CC-A9FW-01	0.679452	0	6.02649	8.80667	5.76985	5.22637	High_risk	5.75799
TCGA-DD-A4NQ-01	1.02192	1	5.0637	10.1456	5.91282	4.86702	High_risk	6.15461
TCGA-DD-A3A7-01	1.14795	1	3.33334	9.6458	5.42315	4.59415	High_risk	6.05577
TCGA-EP-A2KA-01	1.71781	1	3.89664	7.03999	4.73057	4.67877	Low_risk	5.08114
TCGA-ED-A7PZ-01	0.0164384	0	7.59376	8.23794	4.8592	5.6413	Low_risk	5.21965
TCGA-G3-A25U-01	4.48219	0	7.10379	7.33183	5.72472	4.61797	Low_risk	4.83287
TCGA-RC-A7SH-01	1.28219	0	5.04132	6.64948	5.91578	6.01594	High_risk	5.84516
TCGA-G3-AAV1-01	0.983562	1	7.29441	10.4946	5.71177	5.12446	High_risk	5.88022
TCGA-2Y-A9GZ-01	2.32329	1	6.14289	6.96879	4.79561	4.6889	Low_risk	4.65363
TCGA-DD-AA3A-01	1.12329	1	5.87377	9.20068	6.23823	5.78769	High_risk	6.33747
TCGA-2Y-A9HA-01	0.0986301	1	5.48736	8.69333	5.64199	5.67242	High_risk	6.02259
TCGA-DD-AADK-01	2.87397	0	4.64923	8.16342	5.25319	4.62072	High_risk	5.37122
TCGA-G3-A5SI-01	2.10411	1	5.45716	6.61674	4.32096	4.48478	Low_risk	4.43141
TCGA-DD-A4NI-01	2.23562	0	7.03171	6.9817	4.40136	4.65544	Low_risk	4.33657
TCGA-DD-A73A-01	1.99452	0	6.14065	8.19071	5.69599	4.78208	High_risk	5.31962
TCGA-MR-A8JO-01	0.90411	0	7.75842	7.34493	5.74139	5.0086	Low_risk	4.91794
TCGA-5R-AA1C-01	1.42466	0	8.23657	10.2181	5.07584	5.5844	High_risk	5.65382
TCGA-ZS-A9CG-01	0.934247	0	7.56645	7.27386	4.89685	4.55374	Low_risk	4.42033
TCGA-DD-A4NH-01	2.51233	0	4.8962	7.11785	5.99027	5.80556	High_risk	5.9108
TCGA-FV-A4ZP-01	6.81096	1	2.53382	7.00217	5.68564	5.32019	High_risk	5.98558
TCGA-DD-AACJ-01	5.7589	0	5.43949	9.46963	4.48923	5.35226	High_risk	5.68607
TCGA-DD-AAVZ-01	5.20548	0	6.00022	7.71147	5.03106	4.93961	Low_risk	5.08346
TCGA-DD-AAVR-01	6.88493	0	6.93829	8.55042	4.47977	4.24842	Low_risk	4.57833
TCGA-RC-A7SB-01	1.61096	0	6.40129	8.06191	4.61149	5.39327	Low_risk	5.19401
TCGA-3K-AAZ8-01	1.08493	0	6.44904	8.24872	4.74635	4.79599	Low_risk	4.96757
TCGA-UB-A7MF-01	0.586301	1	6.55051	6.18142	4.89584	4.9359	Low_risk	4.53075
TCGA-BC-A10R-01	0.843836	1	6.42579	6.7828	5.45732	5.44145	Low_risk	5.16076
TCGA-ED-A459-01	2.49315	0	4.77021	8.64737	4.76358	4.64629	High_risk	5.32513
TCGA-ZP-A9D1-01	0.0575342	0	6.04783	8.9488	4.82391	5.05393	High_risk	5.3879
TCGA-ZP-A9D0-01	2.98904	0	6.77632	8.55249	5.47748	5.27086	High_risk	5.47249
TCGA-CC-A7IK-01	0.717808	1	4.72501	8.95922	5.453	6.46202	High_risk	6.58784
TCGA-WQ-AB4B-01	1.08219	0	5.2369	7.43738	4.83671	4.07196	Low_risk	4.64445
TCGA-FV-A4ZQ-01	0.0328767	0	5.10261	7.07313	4.99424	5.30339	High_risk	5.26799
TCGA-G3-A25S-01	1.13973	1	5.09567	9.88409	5.43771	5.58669	High_risk	6.29702
TCGA-NI-A4U2-01	4.90685	1	7.33585	7.8055	4.64007	4.81128	Low_risk	4.65264
TCGA-RC-A7SK-01	1.29315	0	5.98682	8.55313	4.36599	5.28049	High_risk	5.2626
TCGA-DD-AADS-01	1.29863	0	5.7116	4.81589	3.67364	4.80226	Low_risk	3.86281
TCGA-DD-A73F-01	2.9726	0	3.65635	5.99952	5.0196	5.21469	Low_risk	5.23069
TCGA-DD-A11C-01	1.8137	0	5.56513	7.14179	4.87928	5.17925	Low_risk	5.09355
TCGA-FV-A23B-01	5.07397	1	4.52433	6.80433	4.93925	5.39033	High_risk	5.33703
TCGA-DD-AADD-01	3.3726	0	6.22276	7.77142	5.84765	5.60183	High_risk	5.67081
TCGA-DD-AACO-01	5.13973	0	5.66707	5.03487	4.35665	4.58154	Low_risk	4.04008
TCGA-RC-A6M3-01	0	0	6.85212	7.73684	5.8971	4.6671	Low_risk	5.07001
TCGA-DD-AAED-01	2.09041	0	5.1501	7.0786	4.92976	4.28443	Low_risk	4.70899
TCGA-BC-A10X-01	2.10959	1	6.39138	6.99152	5.04928	4.23642	Low_risk	4.4601
TCGA-CC-5260-01	0.238356	1	5.8783	7.37105	5.67557	5.76788	High_risk	5.66251
TCGA-DD-AAD3-01	3.54795	0	5.94448	8.29715	4.09485	4.68309	Low_risk	4.80355
TCGA-G3-AAV7-01	0.989041	0	4.03382	8.85816	6.36125	5.38028	High_risk	6.43393
TCGA-DD-A39Y-01	0.468493	1	3.48919	11.2219	6.19508	4.84284	High_risk	6.82182
TCGA-K7-A5RG-01	1.42192	0	6.9215	8.90536	5.31505	4.69363	Low_risk	5.18243
TCGA-G3-A25Y-01	1.23836	1	6.84883	7.6047	4.56529	5.55502	Low_risk	5.0567
TCGA-DD-AACF-01	1	1	6.38526	7.72066	4.42006	5.02218	Low_risk	4.85169
TCGA-DD-A3A2-01	5.83836	1	7.03622	7.32242	5.17066	5.05775	Low_risk	4.88866
TCGA-DD-A115-01	6.96438	1	5.6953	8.10974	5.21766	5.15279	High_risk	5.4192
TCGA-DD-A1EG-01	3.7589	1	4.47054	9.12113	5.13759	5.00915	High_risk	5.81947
TCGA-DD-AADO-01	1.2411	0	3.54268	5.90317	4.09047	5.1363	Low_risk	4.87904
TCGA-5C-A9VH-01	0.882192	0	5.28152	8.73156	5.38516	4.77329	High_risk	5.51986
TCGA-BC-A10Q-01	3.10959	1	8.24577	6.99145	5.84763	5.8588	Low_risk	5.20848
TCGA-BC-A110-01	5.79726	1	6.30438	6.48007	4.88749	3.92022	Low_risk	4.1255
TCGA-DD-AAW3-01	4.47397	0	5.50462	7.66152	5.75347	5.49115	High_risk	5.69269
TCGA-2Y-A9H7-01	3.2	0	4.8853	6.18379	5.19722	4.98146	Low_risk	4.97794
TCGA-RC-A6M5-01	0.0410959	0	7.7409	7.9939	5.0978	5.0626	Low_risk	4.90554
TCGA-BC-A69H-01	1.21644	0	3.19278	8.02063	5.42959	5.11783	High_risk	5.93344
TCGA-CC-5258-01	0.353425	1	4.37737	8.89931	5.79313	5.35355	High_risk	6.17592
TCGA-BC-A69I-01	1.06027	0	7.32753	6.86575	4.54564	4.71173	Low_risk	4.326
TCGA-G3-A7M9-01	0.153425	1	6.13938	6.93224	7.03492	5.66285	High_risk	5.89307
TCGA-ED-A627-01	1.1589	0	6.77982	7.05699	5.19701	4.73988	Low_risk	4.71257
TCGA-DD-AACC-01	4.61644	1	5.48936	6.80384	4.32941	4.5869	Low_risk	4.52988
TCGA-DD-A4NB-01	2.70959	0	8.17496	7.44959	5.47677	5.33136	Low_risk	4.94462
TCGA-ED-A66X-01	1.11233	0	4.69031	8.08118	5.42598	5.1995	High_risk	5.70001
TCGA-DD-A114-01	3.14795	1	4.72052	10.0758	6.00922	5.47651	High_risk	6.55185
TCGA-DD-A3A9-01	2.55068	1	5.52462	7.74597	4.53608	5.88167	High_risk	5.51062
TCGA-XR-A8TG-01	2.46027	0	5.52539	7.52739	4.59064	5.25795	Low_risk	5.14718
TCGA-ES-A2HT-01	1.2	1	5.80068	7.85792	3.78787	4.34767	Low_risk	4.44073
TCGA-2Y-A9H3-01	4.15342	0	5.84994	5.80952	4.06505	4.59433	Low_risk	4.11678
TCGA-2Y-A9HB-01	0.712329	0	6.38592	7.95259	4.80167	5.22642	Low_risk	5.1447
TCGA-DD-A3A6-01	8.92603	1	5.48127	7.75193	4.09609	5.2223	Low_risk	5.03195
TCGA-BW-A5NO-01	0.0547945	0	5.74301	7.89758	4.5342	4.7613	Low_risk	4.9246
TCGA-CC-A3MA-01	0.830137	1	6.50079	6.78924	4.99957	6.09328	High_risk	5.33521
TCGA-DD-AADC-01	1.16438	1	5.28899	8.93861	5.64863	3.89783	Low_risk	5.20447
TCGA-CC-A7IL-01	0.761644	1	6.29234	8.488	4.60171	5.20876	Low_risk	5.22713
TCGA-DD-AACV-01	4.19452	0	5.72335	8.11765	5.33244	4.90267	High_risk	5.32378
TCGA-DD-AAD1-01	1.54521	0	5.73179	8.26047	5.42797	5.35926	High_risk	5.62849
TCGA-DD-AAVV-01	6.72603	0	4.77813	9.56785	5.01242	5.33865	High_risk	6.00623
TCGA-ED-A8O5-01	1.11233	0	4.44853	6.92471	4.5522	5.73528	High_risk	5.4343
TCGA-ED-A97K-01	0.0164384	0	6.1165	7.62061	4.76892	5.29435	Low_risk	5.13482
TCGA-UB-A7MB-01	1.64658	0	6.08995	7.61594	4.99112	5.57283	High_risk	5.35717
TCGA-CC-5264-01	0.279452	1	5.3633	7.54435	6.07538	4.85643	High_risk	5.46611
TCGA-ED-A66Y-01	0.810959	1	2.62197	6.95882	5.48613	5.20414	High_risk	5.83073
TCGA-KR-A7K2-01	2.27123	0	5.23757	6.83835	4.54867	4.50177	Low_risk	4.6161
TCGA-DD-AAEG-01	1.96986	0	6.36249	9.41791	5.3197	4.81538	High_risk	5.48946
TCGA-DD-AACG-01	1.28493	1	4.51683	6.36664	3.78055	5.22487	Low_risk	4.75439
TCGA-CC-A123-01	0.6	0	2.80781	5.37418	4.2766	5.22089	Low_risk	4.98922
TCGA-DD-AAVQ-01	7.47397	0	5.22352	6.51166	4.74586	5.26236	Low_risk	4.99442
TCGA-RC-A7S9-01	1.75342	0	4.91902	6.40997	4.64754	4.54201	Low_risk	4.6198
TCGA-BC-A8YO-01	1.53973	0	4.7624	8.91104	5.90056	5.47998	High_risk	6.20562
TCGA-DD-A4NR-01	0.0246575	1	6.3227	8.81556	6.24702	5.38003	High_risk	5.94083
TCGA-CC-A8HU-01	0.942466	1	4.913	7.77076	6.1644	5.47607	High_risk	5.96425
TCGA-XR-A8TD-01	2.82192	0	5.42274	7.78397	4.19615	5.09717	Low_risk	5.01974
TCGA-DD-A4NK-01	3.31507	1	7.11694	7.98823	5.57266	4.97991	Low_risk	5.13942
TCGA-DD-A4ND-01	7.52329	0	4.59622	6.76703	5.16584	5.00741	Low_risk	5.1893
TCGA-ZP-A9D2-01	2.09589	1	6.48233	8.94726	5.75945	5.5424	High_risk	5.86714
TCGA-DD-AADI-01	2.9726	0	4.87715	6.95581	4.3024	4.61052	Low_risk	4.69163
TCGA-2Y-A9GX-01	6.69041	0	6.13047	9.36663	5.35711	5.09216	High_risk	5.6774
TCGA-DD-AACY-01	3.9726	0	5.47766	7.54613	5.67671	3.76213	Low_risk	4.74328
TCGA-DD-AAW0-01	5.52055	0	6.29695	9.29178	5.25095	4.64348	High_risk	5.35709
TCGA-BC-A216-01	3.70137	0	3.29407	7.89763	5.12705	5.38862	High_risk	5.92228
TCGA-CC-A3MB-01	0.863014	1	5.40242	9.29213	5.53932	6.51647	High_risk	6.60021
TCGA-DD-A4NE-01	1.80822	1	5.13182	7.22386	4.84649	4.05667	Low_risk	4.60441
TCGA-5R-AAAM-01	0.126027	1	6.46296	7.07239	5.27111	4.71783	Low_risk	4.79114
TCGA-ZS-A9CF-01	6.60822	0	5.90912	7.04035	4.91232	4.90417	Low_risk	4.86825
TCGA-RC-A6M6-01	0.0246575	0	5.18432	10.0177	5.1671	5.19021	High_risk	6.01888
TCGA-DD-AACI-01	4.43288	0	6.41553	7.8037	4.66686	4.63165	Low_risk	4.74617
TCGA-EP-A3JL-01	0.830137	0	4.9231	8.34232	5.42865	4.33182	High_risk	5.27267
TCGA-CC-A5UD-01	0.832877	1	6.10878	8.96784	4.75719	6.31136	High_risk	6.01281
TCGA-ES-A2HS-01	1.88493	1	4.5734	4.36145	4.11445	5.56554	Low_risk	4.50797
TCGA-BC-A10U-01	2.29315	1	5.98083	9.22321	5.43437	5.16973	High_risk	5.73494
TCGA-DD-A119-01	0.610959	1	5.06434	7.89459	4.90914	4.14255	Low_risk	4.85792
TCGA-2Y-A9H1-01	3.36712	1	4.73144	6.79959	4.25354	4.30174	Low_risk	4.50238
TCGA-G3-A5SK-01	2.03836	0	7.34181	6.71301	4.38499	3.67441	Low_risk	3.69074
TCGA-BC-A10Y-01	1.94795	1	3.80488	7.63534	4.86055	4.6965	High_risk	5.30656
TCGA-DD-AAE1-01	1.51233	0	3.71623	7.91673	4.93155	4.80119	High_risk	5.47514
TCGA-DD-AADN-01	2.46027	0	2.45049	7.8211	6.07454	4.07737	High_risk	5.69798
TCGA-CC-A3M9-01	0.821918	1	5.60444	6.79787	5.44795	4.9096	Low_risk	5.04435
TCGA-DD-A73C-01	1.92055	0	6.91938	7.31842	5.76633	5.47089	High_risk	5.32245
TCGA-BW-A5NP-01	0	0	4.03753	7.61424	4.59419	5.69285	High_risk	5.68579
TCGA-FV-A495-01	0.00273973	0	4.5809	7.00795	4.16207	4.94698	Low_risk	4.89118
TCGA-G3-AAV4-01	0.0739726	1	7.47437	8.81438	5.33664	5.7132	High_risk	5.58877
TCGA-BC-A10W-01	0.249315	1	5.04074	10.9588	5.75537	4.98351	High_risk	6.37968
TCGA-DD-A1EK-01	1.52877	1	5.28097	7.76441	5.0695	5.1934	High_risk	5.3815
TCGA-DD-AAD6-01	1.8411	0	4.59092	8.21535	5.35979	4.29493	High_risk	5.26198
TCGA-G3-A3CH-01	2.13699	0	6.75456	7.58566	5.49756	5.31381	Low_risk	5.25343
TCGA-CC-A8HS-01	0.821918	1	4.42039	5.64626	6.28794	5.90554	High_risk	5.76973
TCGA-DD-AAEA-01	1.57534	0	5.69108	7.27109	5.33689	5.26415	High_risk	5.2986
TCGA-DD-A1EE-01	0.956164	1	7.20182	10.616	5.67643	5.24467	High_risk	5.98067
TCGA-FV-A3I1-01	0.676712	1	5.56781	8.58104	5.70452	5.58177	High_risk	5.95126
TCGA-G3-A5SJ-01	1.91233	0	4.92722	7.56503	4.51777	4.22227	Low_risk	4.71033
TCGA-BC-A3KG-01	1.86301	0	4.50865	8.00934	5.06663	4.89482	High_risk	5.43902
TCGA-DD-AAVS-01	4.99452	0	6.25509	7.27512	5.18393	5.87024	High_risk	5.45474
TCGA-CC-A7IH-01	1	0	7.12685	7.08439	4.96276	5.54007	Low_risk	4.9909
TCGA-FV-A3I0-01	2.32329	0	7.72823	7.07576	5.8873	5.2857	Low_risk	5.046
TCGA-MI-A75H-01	2.04658	0	6.80605	7.49745	4.82585	5.03049	Low_risk	4.85057
TCGA-CC-A9FV-01	0	0	6.17068	8.2162	4.85006	5.46045	High_risk	5.39297
TCGA-BC-A217-01	3.8274	1	5.89573	8.39446	3.93791	5.36723	Low_risk	5.14216
TCGA-DD-AAD5-01	3.68493	0	4.33935	9.21367	5.67511	4.40127	High_risk	5.73103
TCGA-2Y-A9H0-01	10.0685	0	3.98043	7.69061	6.03902	4.58985	High_risk	5.62187
TCGA-DD-AAD8-01	3.33973	0	5.64844	7.6576	4.75537	4.85711	Low_risk	5.00341
TCGA-DD-A73D-01	1.89863	0	7.02939	8.12713	5.36026	5.5799	High_risk	5.43428
TCGA-DD-A1EI-01	0.50137	0	5.60587	8.5767	5.57008	5.43343	High_risk	5.82107
TCGA-K7-A5RF-01	1.72877	0	6.69146	7.09361	4.44584	4.95726	Low_risk	4.60346
TCGA-DD-AACT-01	4.27945	0	4.97461	8.94835	4.70694	4.61923	High_risk	5.33117
TCGA-DD-A73B-01	0.775342	1	5.61889	6.96367	5.33303	3.93706	Low_risk	4.54101
TCGA-DD-A4NO-01	6.15068	0	5.92356	7.96179	4.59969	5.33529	Low_risk	5.2265
TCGA-2Y-A9H8-01	1.73425	1	3.47736	6.76359	4.7629	5.43338	High_risk	5.49346
TCGA-DD-A3A8-01	0.030137	1	6.2762	7.29095	4.71414	5.04129	Low_risk	4.86808
TCGA-LG-A9QC-01	1.16438	0	6.77564	8.88946	5.41859	5.497	High_risk	5.65863
TCGA-RC-A7SF-01	1.5863	0	5.21161	8.58767	5.05972	3.94622	Low_risk	4.95798
TCGA-HP-A5N0-01	3.14247	1	5.74171	6.89849	4.91811	5.07306	Low_risk	4.95346
TCGA-DD-A73E-01	0.120548	0	6.63764	7.95401	5.17337	6.03291	High_risk	5.63876
TCGA-G3-A5SL-01	1.70137	0	7.99848	7.3126	4.93804	4.86147	Low_risk	4.52029
TCGA-2Y-A9H6-01	0.978082	0	6.79654	7.69144	5.32767	5.13721	Low_risk	5.12477
TCGA-WX-AA47-01	1.52329	1	6.78502	7.4552	5.17053	4.66337	Low_risk	4.76691
TCGA-MR-A520-01	0.627397	0	7.45026	6.72242	4.94303	4.862	Low_risk	4.47458
TCGA-DD-A3A1-01	0.638356	1	4.62612	9.18948	5.75138	4.72892	High_risk	5.86473
TCGA-DD-AADF-01	0.315068	1	6.47545	6.31647	3.79021	5.32288	Low_risk	4.41551
TCGA-G3-A7M7-01	0.989041	0	7.31822	8.84102	5.73627	5.00335	High_risk	5.38928
TCGA-DD-AADQ-01	1.19452	0	6.34962	7.84219	4.9267	3.81474	Low_risk	4.43027
TCGA-DD-AAVX-01	4.70685	0	5.86588	7.67391	5.10639	4.62446	Low_risk	4.96079
TCGA-MI-A75E-01	1.38904	0	6.42656	8.48195	4.96988	5.02761	Low_risk	5.22728
TCGA-GJ-A3OU-01	2.40822	0	5.39099	8.23527	5.07181	5.05614	High_risk	5.41241
TCGA-DD-A11B-01	0.0383562	1	7.03519	6.78362	5.42539	5.44802	Low_risk	5.0356
TCGA-LG-A6GG-01	1.06027	0	6.41395	8.68222	4.74056	5.93035	High_risk	5.67545
TCGA-CC-A7IJ-01	1.04658	0	6.39269	7.83337	6.132	5.883	High_risk	5.89442
TCGA-DD-AACA-01	6.30411	0	6.75627	8.24195	4.20992	5.84692	High_risk	5.27499
TCGA-DD-A39V-01	1.76164	1	3.74035	6.98791	4.21679	4.44238	Low_risk	4.80474
TCGA-2Y-A9GS-01	1.98356	1	4.68405	9.40087	5.7539	5.99373	High_risk	6.56719
TCGA-DD-AACW-01	3.90137	0	5.5808	6.67967	5.3355	5.68038	High_risk	5.38166
TCGA-FV-A3R2-01	0.531507	1	5.43728	8.7013	6.07233	5.73993	High_risk	6.21206
TCGA-ZP-A9CY-01	2.14247	0	6.22308	7.74177	4.81914	5.04123	Low_risk	5.03077
TCGA-NI-A8LF-01	2.18904	0	7.85402	8.14048	4.30168	5.29158	Low_risk	4.77718
TCGA-DD-AAE2-01	1.74795	0	5.84119	7.3832	5.16269	4.20097	Low_risk	4.68816
TCGA-5C-A9VG-01	0.89863	0	7.22032	6.32645	7.23571	5.0684	High_risk	5.28272
TCGA-KR-A7K8-01	2.48219	0	5.1237	6.28072	4.73148	5.97784	High_risk	5.32082
TCGA-ZP-A9CZ-01	1.93425	0	4.59974	8.73027	5.69992	4.84537	High_risk	5.79354
TCGA-EP-A12J-01	1.56164	0	7.01565	7.55351	5.0895	5.41251	Low_risk	5.11053
TCGA-DD-A4NV-01	6.56986	0	7.05391	7.33428	5.23636	5.29581	Low_risk	5.03387
TCGA-BC-A3KF-01	0.0219178	0	5.44601	6.76813	5.36476	4.27792	Low_risk	4.71129
TCGA-G3-A3CK-01	1.60274	0	7.78848	7.29815	4.83803	5.06726	Low_risk	4.63115
TCGA-DD-A1EJ-01	2.75342	1	4.00365	8.23256	5.58403	5.38352	High_risk	6.02076
TCGA-DD-AACU-01	4.29315	0	5.89442	9.76636	5.42191	4.89309	High_risk	5.74544
TCGA-ZS-A9CE-01	3.4	0	4.87647	7.2732	4.65399	5.02269	Low_risk	5.10538
TCGA-2Y-A9H2-01	4.74247	0	7.36712	7.60963	5.13538	5.69306	Low_risk	5.21808
TCGA-CC-5261-01	0.265753	1	5.00019	7.53082	5.38246	5.74573	High_risk	5.76591
TCGA-DD-AADA-01	3.37808	0	5.36419	7.2928	4.42059	4.437	Low_risk	4.63401
TCGA-G3-A25X-01	4.87397	0	4.67086	6.04664	4.37757	4.88542	Low_risk	4.66228
TCGA-EP-A3RK-01	0.994521	0	4.44501	8.64676	5.59943	4.86584	High_risk	5.77912
TCGA-2Y-A9H5-01	1.52055	1	5.47623	7.46465	4.98116	5.11653	Low_risk	5.19617
TCGA-G3-A3CG-01	1.84384	0	6.39934	8.46917	5.07289	5.05237	High_risk	5.27623
TCGA-BC-A112-01	0.419178	1	5.90469	10.1142	5.94349	5.51276	High_risk	6.32924
TCGA-ED-A4XI-01	2.24384	0	6.31429	7.97682	4.74082	5.21869	Low_risk	5.14074
TCGA-2Y-A9GT-01	4.44932	1	7.09234	6.7415	4.31415	5.08649	Low_risk	4.45739
TCGA-DD-AACX-01	0.465753	0	7.12796	10.8108	5.07798	5.74067	High_risk	6.10549
TCGA-DD-A1EB-01	5.52603	0	7.35683	8.11574	5.76767	4.69348	Low_risk	5.04181
TCGA-DD-AACE-01	5.98356	0	5.56606	8.29694	4.7638	5.209	High_risk	5.37199
TCGA-2Y-A9H9-01	1.90959	0	7.64386	7.906	4.51128	5.01403	Low_risk	4.68188
TCGA-CC-5262-01	0.282192	1	6.18432	9.01398	5.36856	5.14467	High_risk	5.60604
TCGA-G3-AAV2-01	1.01918	0	5.95164	7.83421	4.86894	5.39267	High_risk	5.3068
TCGA-DD-A4NN-01	2.46301	1	4.39645	6.90251	5.2562	5.63973	High_risk	5.62214
TCGA-DD-AACZ-01	0.468493	1	5.7778	11.2269	6.20976	5.8539	High_risk	6.90977
TCGA-DD-AAE0-01	1.52055	0	5.13696	7.04302	5.02862	5.47512	High_risk	5.35417
TCGA-YA-A8S7-01	1.12877	1	5.74078	8.18872	5.30914	5.01486	High_risk	5.38956
TCGA-2Y-A9GY-01	2.07397	1	5.39198	7.97924	5.42204	5.73339	High_risk	5.81361
TCGA-UB-A7ME-01	1.33151	0	4.69327	6.84103	5.03201	5.03788	Low_risk	5.16129
TCGA-ED-A8O6-01	0.153425	1	4.86878	7.84869	5.42393	5.47522	High_risk	5.74742
TCGA-ZP-A9D4-01	1.08219	0	7.97448	8.50432	5.04717	5.32318	Low_risk	5.11214
TCGA-DD-A1EH-01	4.09589	0	5.13977	6.28479	5.30149	5.43025	Low_risk	5.22285
TCGA-DD-A11A-01	0.216438	0	6.19195	7.93697	5.87531	4.94365	High_risk	5.38689
TCGA-BC-A10Z-01	0.0931507	1	6.70236	7.34447	5.69513	5.9041	High_risk	5.57303
TCGA-DD-AAEK-01	2.92329	0	5.58262	7.92779	4.91239	5.39364	High_risk	5.4177
TCGA-EP-A2KB-01	1.63288	1	5.30425	7.73533	4.31942	5.21705	Low_risk	5.13321
TCGA-ED-A7PX-01	0.0164384	0	6.2328	9.30058	6.79383	5.06213	High_risk	6.10066
TCGA-G3-A5SM-01	1.42466	0	5.59231	8.70205	4.91511	5.00775	High_risk	5.41808
TCGA-DD-AAEB-01	1.30959	0	6.05907	5.2851	4.40679	4.23895	Low_risk	3.86779
TCGA-BC-A5W4-01	1.49863	1	4.36481	6.44031	4.30902	5.43858	Low_risk	5.0893
TCGA-CC-A8HV-01	0.764384	1	4.87387	8.35439	6.08849	5.84185	High_risk	6.28918
TCGA-GJ-A9DB-01	0.183562	1	6.09426	8.94011	5.52492	4.87225	High_risk	5.51438
TCGA-BD-A3ER-01	3.05479	0	5.57614	8.30765	5.38203	4.63433	High_risk	5.2788
TCGA-ZP-A9CV-01	2.98082	1	7.09742	8.44084	5.73775	5.31661	High_risk	5.49108
TCGA-DD-AADY-01	1.52055	0	7.12285	7.41831	4.1529	5.24034	Low_risk	4.65466
TCGA-MI-A75I-01	1.72603	0	4.80319	9.47887	5.39283	4.77939	High_risk	5.81336
TCGA-G3-A3CI-01	0.493151	0	6.40216	6.64204	4.66515	4.36042	Low_risk	4.30405
TCGA-CC-A5UC-01	0.950685	1	4.89242	8.59347	6.22408	5.41471	High_risk	6.17077
TCGA-FV-A496-01	0.0273973	0	4.75658	7.63072	4.98117	3.9398	Low_risk	4.7672
TCGA-DD-AACK-01	0.0246575	0	5.70626	8.76268	6.04047	5.08178	High_risk	5.82309
TCGA-XR-A8TE-01	2.53425	0	7.05806	7.95301	4.84698	4.84796	Low_risk	4.83264
TCGA-DD-A3A4-01	1.67671	1	7.82719	8.34611	5.17264	4.70124	Low_risk	4.81759
TCGA-RC-A6M4-01	0.060274	0	6.1421	8.56074	4.58915	5.26127	High_risk	5.2984
TCGA-ED-A7PY-01	1.06849	0	6.20488	6.9	4.33193	5.46662	Low_risk	4.87447
TCGA-DD-AADL-01	1.74247	0	5.70051	7.73442	5.99469	5.41099	High_risk	5.71194
TCGA-UB-A7MC-01	1.36986	0	7.12625	9.36701	5.09432	5.65162	High_risk	5.6882
TCGA-ED-A82E-01	1.11781	0	8.92335	7.2301	4.52422	5.18682	Low_risk	4.35145
TCGA-UB-AA0U-01	0.89589	0	4.46514	7.25952	5.39968	5.38037	High_risk	5.61464
TCGA-CC-A9FU-01	0	0	4.00839	6.40106	5.59011	6.01502	High_risk	5.87235
TCGA-DD-A113-01	6.64384	0	5.39422	9.52516	5.31069	3.54706	Low_risk	5.04275
TCGA-KR-A7K0-01	0.178082	1	7.71405	8.8569	4.88465	5.36959	Low_risk	5.22496
TCGA-DD-A4NL-01	4.68767	0	6.38967	7.26959	4.58767	4.30322	Low_risk	4.4148
TCGA-DD-AADW-01	1.60822	0	4.38073	6.93817	5.50264	6.16814	High_risk	5.99092
TCGA-DD-A39Z-01	1.64658	1	4.97112	6.44601	3.77233	4.90518	Low_risk	4.51801
TCGA-DD-AACB-01	6.36712	0	4.25652	7.92549	4.61506	5.8707	High_risk	5.82392
TCGA-DD-AADG-01	3.13699	0	7.7134	7.89116	5.41369	5.56812	Low_risk	5.25159
TCGA-DD-AAW1-01	5.44932	0	7.12316	8.22327	4.46919	4.83199	Low_risk	4.75706
TCGA-DD-AAC9-01	0.950685	0	5.60943	7.67681	4.30291	4.02764	Low_risk	4.43477
TCGA-G3-A25Z-01	1.79452	0	5.03996	8.42549	4.90077	5.52363	High_risk	5.71658
TCGA-DD-A4NF-01	2.58082	0	8.16542	7.66901	4.70863	5.43802	Low_risk	4.80472
TCGA-G3-A25V-01	2.35616	0	6.5675	8.18202	4.75971	4.90321	Low_risk	4.98737
TCGA-G3-AAV5-01	0.969863	0	5.73639	9.37274	5.39402	4.81807	High_risk	5.62514
TCGA-BD-A2L6-01	3.73425	0	3.42837	6.28984	4.20717	5.09407	Low_risk	5.01881
TCGA-XR-A8TF-01	1.89863	1	8.22056	7.33145	5.35115	5.05781	Low_risk	4.72109
TCGA-DD-AACP-01	1.13699	0	3.52591	7.39191	5.73925	5.5629	High_risk	6.03879
TCGA-G3-A7M5-01	1.22466	0	7.1044	6.82025	5.10225	4.22781	Low_risk	4.29016
TCGA-DD-A4NS-01	6.72877	1	6.35636	7.8745	5.11738	5.25533	Low_risk	5.24969
TCGA-WX-AA46-01	2.07123	0	6.6385	6.77586	5.10489	4.25091	Low_risk	4.38184
TCGA-O8-A75V-01	1.47397	0	5.67065	9.19191	4.56806	4.70415	High_risk	5.25785
TCGA-DD-AACH-01	0.534247	1	5.82521	11.4151	7.26196	5.77824	High_risk	7.25892
TCGA-BC-A10S-01	3.89863	1	5.64152	7.80222	5.34208	4.60063	Low_risk	5.10348
TCGA-DD-AACN-01	3.56712	0	6.09053	7.40726	5.02566	5.20215	Low_risk	5.1213
TCGA-DD-A1ED-01	6.30411	0	7.79278	6.63185	4.40706	4.45321	Low_risk	3.99437
TCGA-CC-A9FS-01	0.578082	0	5.92395	7.05982	5.77269	4.84455	Low_risk	5.12448
TCGA-T1-A6J8-01	0.0630137	0	5.02438	9.16156	5.68527	4.99273	High_risk	5.89547
TCGA-DD-A73G-01	9.52877	0	6.3737	5.72094	4.54716	5.07919	Low_risk	4.40391
TCGA-KR-A7K7-01	2.60548	0	5.43377	7.91019	5.12143	4.74318	Low_risk	5.17299
TCGA-XR-A8TC-01	3.66849	0	6.86174	7.32418	5.28008	4.91277	Low_risk	4.88382
TCGA-ZS-A9CD-01	3.79726	1	5.98495	8.43721	5.33966	4.49683	Low_risk	5.14777
TCGA-2Y-A9GV-01	6.93699	1	4.92181	7.39323	5.09414	5.38215	High_risk	5.46064
TCGA-BC-A10T-01	2.29315	1	5.7042	7.60151	5.0707	5.00496	Low_risk	5.15931
TCGA-DD-AAEI-01	4.19452	0	4.62128	8.81532	5.98919	4.64208	High_risk	5.80167
TCGA-FV-A2QQ-01	1.99726	0	5.75283	9.10497	5.69188	4.33255	High_risk	5.39829
TCGA-PD-A5DF-01	1.75068	1	5.24994	7.26501	5.34329	4.66305	Low_risk	5.07213
TCGA-EP-A2KC-01	0.0520548	1	5.75586	8.70754	4.44291	4.9783	Low_risk	5.21604
TCGA-CC-A7IG-01	0.819178	1	3.57702	8.98175	4.98448	5.23549	High_risk	6.02341
TCGA-DD-A3A3-01	1.46575	1	5.34558	8.24585	4.12696	3.96301	Low_risk	4.54254
TCGA-4R-AA8I-01	0.717808	1	7.08906	8.37514	5.45829	5.41055	High_risk	5.43183
TCGA-G3-AAV3-01	1.12877	0	6.78292	8.79554	4.95125	5.03235	Low_risk	5.23627
TCGA-G3-A3CJ-01	1.6274	0	6.66134	7.33743	3.86582	4.43309	Low_risk	4.2082
TCGA-DD-A4NG-01	2.19726	1	5.77936	7.84939	5.38375	5.38126	High_risk	5.50879
TCGA-DD-A4NP-01	9.06301	0	6.7104	6.40353	4.69846	4.75199	Low_risk	4.39667
TCGA-5R-AA1D-01	1.23014	0	7.3272	6.57014	4.68053	4.35097	Low_risk	4.10602
TCGA-ED-A5KG-01	2.33973	0	4.60837	6.57806	4.92923	5.27029	Low_risk	5.19595
TCGA-DD-AAW2-01	5.08219	0	6.59629	8.59221	4.82716	4.92527	Low_risk	5.12263
TCGA-2Y-A9GW-01	3.48219	1	4.50874	8.47998	5.65605	4.24336	High_risk	5.4183
TCGA-DD-A116-01	4.44384	1	6.13733	8.02865	4.9005	5.29826	High_risk	5.28287
TCGA-CC-A1HT-01	0.276712	1	5.79074	9.04985	6.22436	6.00261	High_risk	6.42139
TCGA-DD-AAC8-01	0.0438356	1	6.82817	10.1468	4.29778	5.21935	High_risk	5.46082
TCGA-G3-AAUZ-01	1.31507	0	6.31123	6.20107	3.9943	4.78706	Low_risk	4.20624
TCGA-DD-AAD2-01	1.80274	0	5.9348	8.90542	5.34803	4.67868	High_risk	5.377
TCGA-BD-A3EP-01	1.12055	0	5.57006	8.66297	5.20161	5.11991	High_risk	5.56543
TCGA-DD-AADR-01	5.55616	0	5.35301	8.58267	5.57592	4.45246	High_risk	5.36351
TCGA-DD-AAVU-01	6.03288	0	4.72328	7.37742	3.8936	5.48552	Low_risk	5.15107
TCGA-QA-A7B7-01	0.257534	0	4.23516	7.55484	5.51628	5.45161	High_risk	5.81198
TCGA-DD-AADP-01	1.25479	0	5.70083	6.70126	5.17273	4.79722	Low_risk	4.85084
TCGA-2Y-A9H4-01	3.97808	0	6.36217	7.16336	5.36346	4.59092	Low_risk	4.79903
TCGA-DD-A1EA-01	6.61644	0	7.3576	9.55371	4.93694	5.39692	High_risk	5.50745
TCGA-CC-A3MC-01	0.994521	0	5.81231	10.5097	5.04797	5.30738	High_risk	6.04687
TCGA-FV-A2QR-01	1.59178	1	4.97037	8.11618	5.69038	5.34426	High_risk	5.81768
TCGA-EP-A26S-01	1.66575	0	7.11999	7.79074	5.15159	5.58479	High_risk	5.26235
TCGA-K7-AAU7-01	0.983562	0	6.04343	10.8082	6.41905	5.43679	High_risk	6.60143
TCGA-G3-AAV6-01	0.178082	1	1.08059	5.39435	5.2874	6.00971	High_risk	6.0746
TCGA-CC-A8HT-01	0.383562	1	5.22672	12.0365	5.99026	5.4576	High_risk	6.94914
TCGA-RG-A7D4-01	3.00822	0	5.95878	9.08514	5.20859	4.96562	High_risk	5.52226
TCGA-DD-AAE9-01	1.97808	0	6.61132	7.85147	4.88978	5.284	Low_risk	5.13372
TCGA-ED-A7XO-01	1.16986	0	5.86703	7.7549	5.10252	4.36681	Low_risk	4.84644
TCGA-DD-AAVP-01	7.53973	0	7.51486	7.68445	5.27351	5.68138	Low_risk	5.24863
TCGA-MI-A75C-01	0.79726	0	5.08409	9.91907	5.61057	4.27252	High_risk	5.68228
TCGA-DD-A39W-01	2.26575	1	7.15687	8.26535	4.96975	5.88562	High_risk	5.47523
TCGA-DD-A4NA-01	2.76164	0	6.70866	7.46245	5.85755	6.5001	High_risk	5.96632
TCGA-DD-AAVY-01	5.39726	0	7.21017	9.16274	5.02923	4.87204	Low_risk	5.19167
TCGA-DD-A1EC-01	1.64932	0	8.40465	7.56133	6.16095	5.0504	Low_risk	5.00977
TCGA-5C-AAPD-01	0.0547945	0	4.64883	6.07861	5.3658	4.76904	Low_risk	4.94176
TCGA-BC-4073-01	2.32603	0	4.92675	9.25513	5.48902	5.30369	High_risk	6.03551
TCGA-WQ-A9G7-01	0.0821918	0	5.63684	8.44433	6.30366	4.98337	High_risk	5.78951
TCGA-CC-A7II-01	1.09315	0	4.66181	6.22114	6.43649	4.9449	High_risk	5.42257
TCGA-DD-AAEH-01	2.14795	0	6.07961	6.58985	4.80351	4.98054	Low_risk	4.7213
TCGA-GJ-A6C0-01	0.0849315	1	4.01623	8.99543	5.30379	4.84496	High_risk	5.84448
TCGA-UB-AA0V-01	0.860274	0	6.15725	6.56352	4.98057	4.53141	Low_risk	4.52447

## Sheet: Table S6_3
Table S6_3 Cox analysis of HCC subgroups.
Mult_cox	p.value	round.summary.cox1...7.....2...5.	round.summary.cox1...8.....3...5.	round.summary.cox1...8.....4...5.
GABARAPL1	0.00951	0.82367	0.71134	0.95373
SQSTM1	0.00192	1.29813	1.10088	1.53072
PGAM5	0.05009	1.39275	0.99986	1.94001
ATG9A	0.00292	1.68204	1.19426	2.36905
