# Supplementary material for: A Mitophagy-Related Gene Signature for Subtype Identification and Prognosis Prediction of Hepatocellular Carcinoma
Source: Int J Mol Sci. 2022 Oct 12;23(20):12123. doi: 10.3390/ijms232012123 (PMC9603050; doi:10.3390/ijms232012123)
Supplement: Supplementary file 1 [file ijms-23-12123-s001.zip › Table S7.xlsx]

## Sheet: Table S7
Table S7 Four-gene signature validation in pan-cancer TCGA Cohort.

## Sheet: Table S7_1
Table S7_1 Riskscores of glioma.
Patients	Times	Status	GABARAPL1	SQSTM1	PGAM5	ATG9A	Risk	RiskScore
TCGA-27-2524-01	0.632877	1	4.8731	6.78564	6.14567	5.12806	High_risk	3.8973
TCGA-06-0139-01	0.991781	1	5.69312	6.70424	5.0088	4.36017	High_risk	2.9534
TCGA-28-5208-01	1.49041	1	6.51824	7.04331	5.80371	5.49229	High_risk	2.67423
TCGA-32-4213-01	1.65479	0	5.15143	7.02374	5.22494	5.46999	High_risk	3.15452
TCGA-06-0187-01	2.26849	1	6.33729	7.5946	5.98247	5.96118	High_risk	3.12117
TCGA-27-2528-01	1.31507	1	5.89764	6.79761	5.6857	5.67654	High_risk	2.70092
TCGA-06-5410-01	0.29589	1	6.09314	7.48879	4.94782	4.99465	High_risk	2.98841
TCGA-41-4097-01	0.0164384	1	6.68545	7.81001	5.13484	6.16342	High_risk	2.43092
TCGA-06-5418-01	0.227397	1	5.68044	6.94539	5.75044	5.66185	High_risk	3.00547
TCGA-19-4065-01	0.586301	0	5.43611	6.63789	5.17942	4.65765	High_risk	3.02782
TCGA-06-0168-01	1.63836	1	6.32056	7.00079	5.27773	6.01524	High_risk	2.17177
TCGA-06-0190-01	0.868493	1	5.9311	7.22799	5.24074	5.54767	High_risk	2.80182
TCGA-19-5960-01	1.24658	1	6.59358	6.21726	5.74276	6.03193	High_risk	1.66075
TCGA-06-0644-01	1.05205	1	5.63082	7.40952	5.58671	5.61875	High_risk	3.32593
TCGA-06-1804-01	1.13425	1	6.62076	6.86472	5.3305	6.83036	Low_risk	1.51348
TCGA-41-2571-01	0.0712329	1	6.20217	6.65281	6.26767	6.12376	High_risk	2.55241
TCGA-19-2619-01	0.805479	0	5.86926	6.83225	5.75818	6.21798	High_risk	2.53177
TCGA-28-5204-01	1.24384	1	5.29841	6.65687	6.10547	5.80823	High_risk	3.17146
TCGA-06-2561-01	1.47123	1	6.9275	7.71663	5.90765	5.91747	High_risk	2.82142
TCGA-27-1831-01	1.38356	1	4.11599	5.73318	5.63662	3.32333	High_risk	4.06832
TCGA-12-5295-01	1.24384	1	6.13799	6.30431	5.94537	5.49326	High_risk	2.40846
TCGA-12-0619-01	2.90959	1	5.76986	8.45212	5.29532	6.07357	High_risk	3.67104
TCGA-19-2620-01	0.405479	1	6.68257	6.89728	5.24357	5.8953	High_risk	1.89674
TCGA-06-5414-01	0.747945	0	5.93204	6.60366	5.67429	5.67473	High_risk	2.51646
TCGA-32-1982-01	0.389041	1	5.82112	6.31774	5.40266	5.27457	High_risk	2.3737
TCGA-06-0645-01	0.479452	1	6.09682	7.28797	5.43595	5.4576	High_risk	2.91563
TCGA-16-1045-01	2.41918	1	6.11521	7.7991	5.21458	6.12426	High_risk	2.85092
TCGA-14-0781-01	0.0794521	1	6.23858	7.32556	4.78724	5.6166	High_risk	2.36109
TCGA-14-0789-01	0.936986	1	6.00931	7.08587	4.99106	5.8072	High_risk	2.35143
TCGA-06-0141-01	0.857534	1	6.04738	7.52697	5.2746	4.91676	High_risk	3.2966
TCGA-06-2565-01	1.3863	1	5.7151	6.43984	5.7044	5.67379	High_risk	2.54063
TCGA-12-3653-01	1.21096	1	4.52476	6.22273	5.96319	6.15788	High_risk	3.04682
TCGA-06-0157-01	0.265753	1	5.90854	6.15618	5.87667	5.753	High_risk	2.26333
TCGA-12-1597-01	1.84932	1	6.21625	6.23048	5.57806	5.75338	High_risk	1.93685
TCGA-76-4931-01	0.764384	1	6.23235	6.98544	5.79744	5.78781	High_risk	2.66036
TCGA-06-0130-01	1.07945	1	5.67168	7.24737	5.46345	5.1515	High_risk	3.3158
TCGA-28-5215-01	0.917808	1	6.33815	7.06879	5.41093	6.02328	High_risk	2.29766
TCGA-06-0882-01	1.73151	1	6.68544	7.13091	5.46931	5.63961	High_risk	2.35263
TCGA-06-5411-01	0.69589	1	7.79814	6.67308	6.07743	5.35462	High_risk	1.81468
TCGA-06-0156-01	0.487671	1	6.05419	7.20803	6.14817	5.68534	High_risk	3.22778
TCGA-32-1970-01	1.28219	1	6.7235	6.82045	5.86528	6.46468	High_risk	1.9353
TCGA-27-1835-01	1.77534	1	5.89871	7.29265	5.60937	5.8969	High_risk	2.94353
TCGA-28-2513-01	0.608219	0	5.34274	7.05766	5.14838	5.52361	High_risk	2.98627
TCGA-32-1980-01	0.0986301	1	8.12426	7.46669	5.40805	5.84577	Low_risk	1.57986
TCGA-06-5417-01	0.424658	0	6.14473	5.60753	6.11264	5.89705	High_risk	1.75534
TCGA-06-0745-01	0.654795	1	5.6145	6.62841	6.09958	5.63576	High_risk	3.02943
TCGA-28-2499-01	0.260274	0	5.98635	7.38817	5.92848	5.83385	High_risk	3.202
TCGA-06-2570-01	2.62466	0	6.06375	6.26914	5.68696	5.82867	High_risk	2.09778
TCGA-14-0817-01	0.449315	1	5.46789	6.51669	5.98022	4.62445	High_risk	3.44327
TCGA-28-5209-01	1.21096	0	5.01937	6.45339	5.87248	5.85922	High_risk	3.00771
TCGA-06-0649-01	0.175342	1	6.13308	6.82297	5.07133	5.43374	High_risk	2.29405
TCGA-14-2554-01	1.45753	1	6.68149	6.58288	5.83645	4.97898	High_risk	2.46971
TCGA-06-2559-01	0.410959	1	6.27674	6.76481	5.86649	5.60996	High_risk	2.58515
TCGA-14-0787-01	0.186301	1	6.76591	7.19078	5.95283	5.87138	High_risk	2.55051
TCGA-12-0618-01	1.08219	1	6.86615	6.25539	5.97127	5.73254	High_risk	1.81245
TCGA-14-1034-01	1.32877	1	6.02132	7.00937	5.38677	6.28225	High_risk	2.3081
TCGA-06-0743-01	2.2	1	5.64444	6.72734	5.67011	5.50058	High_risk	2.87839
TCGA-28-5213-01	2.60548	0	5.74146	7.25156	5.4089	4.61159	High_risk	3.50107
TCGA-06-2557-01	0.090411	1	5.87227	7.13498	5.74305	5.96661	High_risk	2.88567
TCGA-26-5133-01	1.23836	0	6.4247	7.14122	6.76034	6.37263	High_risk	3.00413
TCGA-76-4927-01	1.46575	1	6.06239	6.78877	5.55353	5.66011	High_risk	2.51285
TCGA-32-2638-01	2.09863	1	5.94624	6.94521	5.43473	5.72795	High_risk	2.60246
TCGA-06-5408-01	0.978082	1	6.2251	7.43816	5.90668	5.99639	High_risk	2.9996
TCGA-28-2514-01	0.438356	0	7.2005	6.83569	5.5967	6.06816	High_risk	1.66604
TCGA-76-4926-01	0.378082	1	7.0411	6.66666	5.16495	5.83929	Low_risk	1.46179
TCGA-14-0790-01	1.14795	1	6.14897	6.25587	6.37518	5.44426	High_risk	2.66372
TCGA-06-5858-01	0.512329	0	5.90771	6.82844	5.51755	5.81554	High_risk	2.54369
TCGA-26-5135-01	0.739726	1	5.80801	7.01071	6.00203	6.0043	High_risk	2.97488
TCGA-32-2616-01	0.613699	1	6.04517	8.40024	5.95345	6.28873	High_risk	3.77716
TCGA-32-2634-01	1.89863	0	6.30833	6.85904	6.07399	5.70052	High_risk	2.73147
TCGA-06-0219-01	0.060274	1	5.39103	6.40636	6.05599	4.36379	High_risk	3.57755
TCGA-19-2629-01	2.01918	1	6.37614	7.94787	5.77144	6.00023	High_risk	3.2264
TCGA-27-1834-01	3.37808	1	6.60311	8.05124	5.26017	5.87646	High_risk	2.89677
TCGA-19-2624-01	0.0136986	1	6.38897	6.01781	5.58137	5.36647	High_risk	1.846
TCGA-12-3652-01	2.90959	1	5.27857	6.28859	5.81048	5.30629	High_risk	2.93918
TCGA-12-5299-01	0.268493	1	5.73357	6.87007	5.67417	5.43436	High_risk	2.97207
TCGA-06-0749-01	0.224658	1	7.33888	6.82383	5.12368	5.44979	Low_risk	1.56298
TCGA-06-0158-01	0.90137	1	6.8153	6.80454	5.48361	6.1737	High_risk	1.75898
TCGA-19-1390-01	2.11507	1	5.94318	6.25256	5.78624	5.61966	High_risk	2.32533
TCGA-06-2562-01	1.04658	1	6.43328	7.34408	5.45355	5.5102	High_risk	2.73534
TCGA-28-1747-01	0.210959	1	6.43769	6.61389	5.48125	5.74861	High_risk	2.04656
TCGA-06-2563-01	2.55342	0	6.06463	6.43515	6.09229	5.58785	High_risk	2.60919
TCGA-28-5216-01	1.13699	0	6.33384	7.17638	5.32452	5.95192	High_risk	2.36581
TCGA-28-2509-01	0.39726	0	5.72442	7.21721	5.87438	5.78454	High_risk	3.21769
TCGA-19-2625-01	0.339726	1	5.35735	8.15916	5.54426	5.82489	High_risk	3.97508
TCGA-02-2483-01	1.27671	0	5.72801	5.80753	6.17478	5.22892	High_risk	2.54155
TCGA-15-0742-01	1.14795	1	5.38086	6.47204	6.06746	5.93325	High_risk	2.88567
TCGA-06-5413-01	0.734247	0	6.0435	6.19882	6.12948	5.13653	High_risk	2.67412
TCGA-06-0125-01	3.96712	1	5.80668	6.41004	5.92548	5.92058	High_risk	2.48252
TCGA-26-1442-01	2.61096	0	8.67836	7.09061	5.19991	6.02882	Low_risk	0.705564
TCGA-06-0646-01	0.479452	1	5.86564	7.50194	6.05281	5.49605	High_risk	3.61313
TCGA-06-5416-01	0.558904	0	5.58677	6.56808	6.14597	5.19731	High_risk	3.24011
TCGA-06-0744-01	3.90685	1	5.809	6.20423	6.28534	5.47239	High_risk	2.76415
TCGA-76-4925-01	0.4	1	5.92778	7.68653	5.88271	5.92647	High_risk	3.405
TCGA-12-0616-01	1.2274	1	6.07673	6.4695	6.13817	5.20419	High_risk	2.84435
TCGA-26-5132-01	0.783562	0	5.04008	7.86632	5.62082	6.34984	High_risk	3.73408
TCGA-02-0055-01	0.208219	1	6.73416	6.772	5.23566	5.15478	High_risk	2.11616
TCGA-06-0132-01	2.11233	1	7.18735	7.19495	4.98136	5.42252	High_risk	1.87867
TCGA-02-2486-01	1.69315	1	6.54817	7.85311	5.31194	4.91917	High_risk	3.26774
TCGA-19-1787-01	1.05479	1	5.66087	8.28665	6.14397	5.27438	High_risk	4.54045
TCGA-06-0184-01	5.82466	1	6.18593	7.06514	4.98566	5.26028	High_risk	2.4846
TCGA-06-0211-01	0.986301	1	5.59553	6.69882	5.99338	5.81498	High_risk	2.94291
TCGA-06-5859-01	0.380822	0	6.87059	8.1765	5.66632	6.46944	High_risk	2.80529
TCGA-06-0129-01	2.80548	1	6.19059	6.02164	5.53647	5.83385	High_risk	1.71886
TCGA-41-3915-01	0.986301	1	6.15378	7.15418	5.28949	6.00943	High_risk	2.41065
TCGA-16-0846-01	0.326027	1	6.823	7.16306	5.31188	5.89318	High_risk	2.06787
TCGA-02-0047-01	1.2274	1	6.55198	6.85887	5.24749	6.18094	High_risk	1.81231
TCGA-06-0878-01	0.59726	0	6.33418	7.67437	5.56529	5.78309	High_risk	3.00413
TCGA-26-5134-01	0.457534	0	5.82584	6.18393	5.59614	5.52962	High_risk	2.26451
TCGA-26-5136-01	1.58082	1	5.73048	7.07558	4.79929	5.77916	High_risk	2.40811
TCGA-14-0871-01	2.41096	1	5.68221	6.2166	5.71892	5.28387	High_risk	2.57919
TCGA-12-0821-01	0.884932	1	6.22161	7.34797	6.29476	5.9457	High_risk	3.20418
TCGA-76-4928-01	0.257534	1	6.24072	6.79686	5.47824	5.50133	High_risk	2.43543
TCGA-02-2485-01	1.28767	0	6.17507	6.36803	5.94306	5.53342	High_risk	2.41562
TCGA-06-0138-01	2.01918	1	5.76882	6.2411	5.47052	5.0171	High_risk	2.51306
TCGA-15-1444-01	4.21096	1	6.52694	6.86757	5.10861	5.82437	High_risk	1.91773
TCGA-06-0210-01	0.616438	1	5.97909	7.05198	5.50873	5.4857	High_risk	2.83277
TCGA-08-0386-01	1.50137	1	6.0794	7.11645	5.92551	6.57407	High_risk	2.56474
TCGA-06-2569-01	0.0356164	0	5.53789	5.88911	5.91415	5.73632	High_risk	2.31325
TCGA-26-5139-01	0.131507	0	6.25608	6.59227	5.50836	5.7907	High_risk	2.14042
TCGA-41-2572-01	1.11233	1	4.673	6.74966	5.90468	5.70296	High_risk	3.56056
TCGA-06-0750-01	0.0767123	1	6.0146	7.95943	5.26685	5.46724	High_risk	3.39475
TCGA-27-2526-01	0.238356	1	5.44395	7.02408	5.53269	4.84927	High_risk	3.46971
TCGA-27-1837-01	1.16986	1	5.98223	6.79367	5.5981	5.91437	High_risk	2.47307
TCGA-27-1832-01	0.821918	1	5.65755	7.99046	5.08883	5.37522	High_risk	3.57369
TCGA-06-0686-01	1.18356	1	6.48189	6.32815	5.7438	5.48497	High_risk	2.08539
TCGA-06-5856-01	0.312329	1	6.83404	7.56701	6.00088	5.57815	High_risk	2.98376
TCGA-28-1753-01	0.10137	0	5.94288	6.56014	5.52813	5.49825	High_risk	2.46549
TCGA-28-5218-01	0.430137	1	6.09627	6.34892	5.1937	5.61441	High_risk	1.92671
TCGA-06-2564-01	0.49589	0	6.15722	7.27328	5.59564	5.72087	High_risk	2.84167
TCGA-32-5222-01	1.60274	1	5.92554	6.10048	6.1497	4.68027	High_risk	2.90257
TCGA-76-4932-01	3.99452	1	5.73249	6.67548	5.69516	5.91068	High_risk	2.5992
TCGA-06-0174-01	0.268493	1	6.30011	6.16448	5.8812	5.54765	High_risk	2.12612
TCGA-06-0178-01	7.34521	1	4.77007	5.66741	6.56873	3.96761	High_risk	3.89468
TCGA-27-2519-01	1.50685	1	6.3158	8.2156	5.8245	6.01562	High_risk	3.50698
TCGA-06-0747-01	0.224658	1	6.06145	6.59618	5.51096	5.64741	High_risk	2.33684
TCGA-06-2558-01	1.0411	1	6.75803	6.52723	6.2116	5.49917	High_risk	2.36754
TCGA-27-1830-01	0.421918	1	6.56657	7.69137	5.39594	5.88153	High_risk	2.71485
TCGA-06-5412-01	0.378082	1	6.20993	7.0593	5.36302	5.11604	High_risk	2.7782
TCGA-14-1829-01	0.59726	0	4.88963	5.83474	5.54529	3.15354	High_risk	3.68709
TCGA-27-2523-01	1.33973	1	5.74342	6.33712	6.2298	5.75233	High_risk	2.74131
TCGA-06-2567-01	0.364384	1	5.88535	7.50913	5.71284	5.99547	High_risk	3.14561
TCGA-27-2521-01	1.39726	1	6.16523	6.66192	6.96665	6.2217	High_risk	2.98698
TCGA-28-5207-01	0.939726	1	6.88095	6.77329	6.06365	5.98362	High_risk	2.15895
TCGA-28-5220-01	1.06301	1	5.4463	6.957	5.92344	5.38341	High_risk	3.40828
TCGA-41-5651-01	1.26027	1	6.94909	6.058	5.82874	5.80122	Low_risk	1.47596
TCGA-76-4929-01	0.30411	1	6.60723	6.80587	6.00421	6.67705	High_risk	1.98367
TCGA-32-2615-01	1.32877	1	5.91803	7.64438	5.71517	5.91327	High_risk	3.27534
TCGA-14-1825-01	0.635616	1	6.05386	6.31428	6.01015	5.58197	High_risk	2.46832
TCGA-32-2632-01	0.736986	1	5.44788	7.20425	5.76067	5.24676	High_risk	3.56756
TCGA-14-1823-01	1.48767	1	7.06429	7.60571	5.51116	4.66426	High_risk	2.99577
TCGA-12-3650-01	0.912329	1	5.80627	6.18843	6.29631	5.69262	High_risk	2.65376
TCGA-06-0238-01	1.10959	1	6.61049	5.65482	5.61699	4.71246	High_risk	1.75329
TCGA-EZ-7264-01	3.29041	0	6.6583	6.89034	5.0189	6.19277	Low_risk	1.61753
TCGA-QH-A870-01	1.08219	0	7.11627	7.13101	5.84229	6.1938	High_risk	2.05491
TCGA-HT-A74O-01	0.00821918	0	6.67186	7.79763	5.27522	6.2401	High_risk	2.48307
TCGA-HT-7469-01	0.961644	1	6.91375	6.80364	5.87675	6.21931	High_risk	1.92819
TCGA-DU-7292-01	0.663014	1	8.22868	7.10648	5.61021	6.33553	Low_risk	1.11764
TCGA-DU-A7TG-01	3.70137	1	8.98629	6.80871	5.66504	6.37078	Low_risk	0.419828
TCGA-S9-A7R1-01	14.1534	1	7.79474	6.79948	5.28943	5.88093	Low_risk	1.15548
TCGA-HT-7689-01	1.24658	0	7.31913	7.34287	5.35566	6.33426	High_risk	1.71609
TCGA-VM-A8CA-01	1.12603	0	8.02265	6.57068	4.96825	5.94682	Low_risk	0.588562
TCGA-DU-8162-01	1.21644	1	8.67422	6.74969	5.35255	6.14078	Low_risk	0.477769
TCGA-HT-8110-01	1.14795	0	6.39469	6.85379	5.12735	5.59771	High_risk	2.1114
TCGA-DB-5281-01	6.52329	0	7.9635	6.82942	5.94026	6.38615	Low_risk	1.2496
TCGA-DB-A64S-01	2.28767	0	6.81649	7.18498	5.3589	6.09941	High_risk	2.02031
TCGA-HT-8109-01	0.463014	0	8.0631	6.84985	5.15934	6.06176	Low_risk	0.856024
TCGA-WY-A85B-01	3.81644	0	6.8924	6.3101	5.53155	5.81019	Low_risk	1.5186
TCGA-E1-5302-01	4.17808	1	7.25366	6.72769	4.73869	6.29118	Low_risk	0.883733
TCGA-HT-7604-01	10.2055	0	7.96293	6.70407	5.49541	5.8926	Low_risk	1.10023
TCGA-DU-A5TT-01	2.03562	0	6.81763	6.55131	5.4736	5.82936	High_risk	1.71335
TCGA-QH-A6XA-01	1.37534	0	7.22671	6.56654	4.92448	5.7593	Low_risk	1.14782
TCGA-CS-6290-01	3.11507	1	6.69554	6.82539	4.79678	5.72331	Low_risk	1.62526
TCGA-HT-7695-01	1.21096	0	8.23915	6.6523	5.53464	6.28459	Low_risk	0.720749
TCGA-S9-A7R2-01	0.865753	1	6.78467	6.86664	5.03731	5.76199	High_risk	1.73912
TCGA-DU-8164-01	1.78356	0	7.42953	6.45547	5.3039	5.98964	Low_risk	1.06448
TCGA-CS-6188-01	2.23014	1	6.22107	7.25115	5.33701	6.19339	High_risk	2.3883
TCGA-QH-A6CU-01	1.23562	0	6.60629	7.02089	4.91251	6.11864	High_risk	1.7226
TCGA-S9-A89Z-01	1.70685	0	6.41638	7.09701	5.89995	6.02181	High_risk	2.58773
TCGA-VM-A8CF-01	1.66849	0	5.93639	6.21641	4.5103	5.53957	Low_risk	1.51527
TCGA-TQ-A7RM-01	3.05753	0	5.89981	5.63324	6.57155	5.96577	High_risk	2.19309
TCGA-DU-5849-01	1.2137	0	7.9139	7.22745	5.66118	6.44526	Low_risk	1.39287
TCGA-WY-A85D-01	3.14247	0	6.91427	6.53299	5.43872	6.17975	Low_risk	1.44596
TCGA-FG-A4MU-01	0.893151	0	5.59915	6.9753	5.66601	6.02007	High_risk	2.85299
TCGA-S9-A6TY-01	2.94795	0	7.80261	6.54715	5.28935	5.87262	Low_risk	0.951081
TCGA-DU-7309-01	0.230137	0	8.18799	6.88929	5.62517	6.26074	Low_risk	1.01394
TCGA-TQ-A7RN-01	2.81096	0	7.09555	6.7382	5.57739	6.15242	Low_risk	1.60022
TCGA-HT-A615-01	1.41096	0	7.15498	7.2139	5.38548	6.09535	High_risk	1.85002
TCGA-E1-A7YL-01	1.34795	1	7.05308	7.29718	5.19751	5.96697	High_risk	1.92188
TCGA-DH-A66B-01	3.50411	0	6.33675	7.26915	5.11022	5.61308	High_risk	2.46417
TCGA-TQ-A7RW-01	2.24932	1	6.72096	6.91293	5.37378	5.92823	High_risk	1.95339
TCGA-QH-A86X-01	0.923288	0	7.03148	6.56741	5.38014	5.91637	Low_risk	1.48953
TCGA-DB-A4XF-01	2.79726	0	7.35442	7.22166	5.17511	6.00159	Low_risk	1.64042
TCGA-HT-7605-01	0.380822	0	8.24703	6.94759	5.33628	6.26485	Low_risk	0.835306
TCGA-TQ-A7RK-01	3.67397	0	6.66873	6.61793	5.60188	5.38256	High_risk	2.15944
TCGA-DU-8161-01	1.97808	1	6.91583	6.73321	5.49909	6.04754	High_risk	1.70927
TCGA-QH-A65X-01	1.32055	0	6.47532	6.78302	5.33751	6.08079	High_risk	1.90587
TCGA-HT-7468-01	0.556164	0	6.86738	6.58179	5.34302	5.97497	Low_risk	1.55196
TCGA-VW-A8FI-01	0.671233	1	5.99415	6.0796	5.04706	5.30638	High_risk	1.82799
TCGA-FG-A4MX-01	1.5589	0	6.57295	6.86511	5.16143	5.8786	High_risk	1.89473
TCGA-HT-A74H-01	0.20274	0	6.75949	6.50346	4.66311	5.56176	Low_risk	1.31732
TCGA-E1-A7YK-01	1.03562	1	6.72981	7.08885	4.51021	5.86714	Low_risk	1.56156
TCGA-S9-A6TV-01	1.56438	0	7.02813	6.54239	5.229	6.23282	Low_risk	1.22091
TCGA-S9-A6WQ-01	1.1726	0	6.82555	6.79104	4.39734	5.56822	Low_risk	1.33291
TCGA-HT-7472-01	0.00273973	0	7.10138	6.75674	5.27924	5.98855	Low_risk	1.49817
TCGA-E1-A7YE-01	2.4274	1	7.03792	6.08316	5.47525	5.67132	Low_risk	1.27496
TCGA-CS-5393-01	3.34795	0	7.07072	6.44376	5.16399	6.11389	Low_risk	1.13013
TCGA-HT-7858-01	4.21918	0	6.56488	6.79905	5.4893	5.89452	High_risk	2.05055
TCGA-DU-A76L-01	2.23014	1	6.71537	7.05932	5.53043	5.60477	High_risk	2.33242
TCGA-FG-8188-01	1.24658	0	6.67464	6.93069	5.19103	6.07146	High_risk	1.80958
TCGA-CS-5396-01	4.46849	0	7.12267	7.49139	4.95891	6.26538	High_risk	1.7364
TCGA-CS-6669-01	4.09315	0	9.16263	6.65303	5.93313	6.64898	Low_risk	0.222127
TCGA-FG-A70Y-01	2.37808	0	7.4067	6.96664	5.18172	6.31776	Low_risk	1.25341
TCGA-FG-8185-01	1.1863	0	6.75919	6.67268	5.51839	5.82486	High_risk	1.87902
TCGA-QH-A6CY-01	1.11781	0	8.45888	6.60277	5.34194	6.13391	Low_risk	0.491128
TCGA-S9-A6WE-01	11.2685	0	7.25875	6.43247	5.1652	5.71243	Low_risk	1.1977
TCGA-HT-7875-01	0.0273973	0	7.25572	6.59593	5.13685	6.08605	Low_risk	1.13248
TCGA-DU-A5TS-01	2.6411	0	7.00365	6.71356	5.26918	5.78447	Low_risk	1.61695
TCGA-CS-6668-01	4.16164	0	6.86878	6.659	5.25683	6.33493	Low_risk	1.38367
TCGA-DB-A4XA-01	1.56986	0	6.88188	7.03705	5.63785	6.34379	High_risk	1.92196
TCGA-P5-A5EZ-01	0.191781	0	6.46414	6.47244	5.78855	6.06702	High_risk	1.96042
TCGA-DU-5855-01	0.567123	0	6.88211	7.46328	5.35764	6.31572	High_risk	2.09806
TCGA-HW-A5KJ-01	2.63562	1	6.9572	6.44819	5.71371	6.2112	Low_risk	1.51297
TCGA-R8-A6MK-01	7.40274	0	7.36856	6.77189	5.04	5.93294	Low_risk	1.21488
TCGA-DH-A7UR-01	4.52055	0	6.98431	6.77974	5.69868	6.00542	High_risk	1.85299
TCGA-HT-7680-01	0.0630137	0	6.76141	7.38861	4.13087	5.42475	High_risk	1.75224
TCGA-HT-A614-01	0.224658	0	7.9444	6.25432	4.72911	5.88233	Low_risk	0.259456
TCGA-DB-A4X9-01	3.86849	0	6.54285	6.73647	5.47141	6.09598	High_risk	1.90503
TCGA-HT-A4DS-01	0.0191781	0	5.69742	6.0641	5.02523	6.36233	Low_risk	1.47747
TCGA-FG-7634-01	1.27945	0	6.86798	6.78179	5.65887	5.9429	High_risk	1.93226
TCGA-DU-7306-01	3.49863	0	7.1055	7.65683	5.40144	6.3776	High_risk	2.11207
TCGA-FG-7636-01	1.49041	0	6.90912	6.46398	5.45985	6.01487	Low_risk	1.48691
TCGA-S9-A7J3-01	1.72329	0	7.10693	6.64491	5.28068	6.319	Low_risk	1.24574
TCGA-TM-A84I-01	2.33973	0	6.97267	5.84224	5.12965	5.48874	Low_risk	0.986836
TCGA-HT-7857-01	0.0191781	0	6.87177	7.15293	5.02109	5.25419	High_risk	2.15015
TCGA-DB-A75O-01	2.56164	0	6.97354	7.25043	5.04442	6.26539	High_risk	1.69108
TCGA-HT-7874-01	3.09589	0	8.78465	6.7514	5.31922	6.41529	Low_risk	0.255536
TCGA-FG-A70Z-01	0.89863	0	7.27538	6.88199	5.57288	5.98	High_risk	1.68354
TCGA-DU-7301-01	2.1589	1	6.92536	7.29441	5.18646	5.88161	High_risk	2.03404
TCGA-DU-A7TI-01	3.2411	1	8.13213	6.55468	5.13586	5.73765	Low_risk	0.716186
TCGA-FG-A60J-01	1.23014	0	7.36253	7.09919	5.12727	6.12666	Low_risk	1.44524
TCGA-HT-7474-01	0.312329	0	8.20195	6.89186	5.20425	6.38502	Low_risk	0.675362
TCGA-DB-A64L-01	2.01644	0	7.71819	6.94542	5.57568	6.12025	Low_risk	1.3904
TCGA-CS-4942-01	3.65753	1	6.96218	6.63377	5.20228	6.15524	Low_risk	1.35627
TCGA-HT-7694-01	0.575342	0	8.59417	6.99532	5.43682	6.37118	Low_risk	0.669131
TCGA-P5-A77W-01	1.6	0	6.85979	6.11047	5.85587	5.72276	Low_risk	1.62983
TCGA-HT-7473-01	1.37808	0	7.06401	7.25081	4.83138	5.95364	Low_risk	1.64766
TCGA-DB-A4XB-01	2.51781	0	7.23739	6.59292	5.95824	6.3999	Low_risk	1.52025
TCGA-HT-7620-01	1.18904	0	7.05054	6.86225	4.73629	5.82955	Low_risk	1.34146
TCGA-TM-A84B-01	2.07671	1	6.7397	6.22431	5.68052	6.31718	Low_risk	1.39653
TCGA-TQ-A8XE-01	2.6137	1	6.67792	6.2365	5.45727	6.5037	Low_risk	1.21087
TCGA-S9-A6WO-01	1.55068	0	6.99684	6.39572	5.33643	5.84324	Low_risk	1.38001
TCGA-DU-A7TD-01	0.624658	1	5.96191	7.14657	5.73105	5.61672	High_risk	3.00005
TCGA-HT-7470-01	3.34247	1	8.04613	6.67732	5.38946	6.35009	Low_risk	0.736814
TCGA-CS-6186-01	1.47397	1	6.18249	6.96254	5.48271	6.3679	High_risk	2.18961
TCGA-HW-8321-01	3.54521	0	7.43648	7.19055	5.4757	6.09041	High_risk	1.71492
TCGA-HT-A74J-01	0.876712	0	7.65315	7.03858	5.39076	6.45059	Low_risk	1.22728
TCGA-R8-A6ML-01	7.83562	0	7.02807	6.59026	4.81156	6.01818	Low_risk	1.09374
TCGA-DU-6407-01	7.87671	1	6.33999	7.0325	5.18191	6.09392	High_risk	2.08522
TCGA-S9-A89V-01	1.5589	0	7.26208	6.61914	4.87336	6.75746	Low_risk	0.652508
TCGA-HT-7481-01	7.99452	0	7.46968	6.68059	5.2057	6.02215	Low_risk	1.1416
TCGA-E1-5322-01	10.8986	1	6.95286	6.80342	5.45965	6.40619	Low_risk	1.54378
TCGA-E1-A7YN-01	1.99178	1	7.00581	8.06674	4.8575	5.82522	High_risk	2.42095
TCGA-DU-7010-01	1.24932	1	7.09906	6.46338	5.8116	5.82892	High_risk	1.68406
TCGA-S9-A7J0-01	1.66849	0	7.72225	6.30972	6.40482	5.97468	Low_risk	1.48112
TCGA-WY-A85A-01	3.61644	0	7.10722	6.18137	5.24027	5.95876	Low_risk	1.01991
TCGA-TQ-A7RQ-01	2.17808	0	7.49654	6.35144	4.9827	6.05862	Low_risk	0.697748
TCGA-HT-7873-01	1.96712	0	7.29242	6.3411	5.20811	6.06559	Low_risk	0.959879
TCGA-DU-8167-01	1.29041	0	6.89781	6.74826	5.53536	5.87515	High_risk	1.83948
TCGA-S9-A6U2-01	2.48767	0	6.96347	6.69583	5.04082	6.09402	Low_risk	1.33082
TCGA-S9-A7IQ-01	3.01096	0	9.17573	6.73018	5.84574	6.57816	Low_risk	0.253892
TCGA-FG-A711-01	4.05753	1	7.29848	6.34825	5.30418	5.99655	Low_risk	1.05724
TCGA-FG-A60L-01	1.79452	0	6.52774	6.2121	4.56899	6.13572	Low_risk	0.889873
TCGA-E1-5307-01	4.8274	1	7.57887	6.57766	5.20834	6.2246	Low_risk	0.893845
TCGA-DB-5279-01	3.70959	0	7.51498	7.44105	4.82086	5.76183	Low_risk	1.60352
TCGA-DU-7018-01	2.55616	1	6.75166	6.4847	5.58998	5.89127	High_risk	1.74634
TCGA-DH-A66D-01	2.31781	0	7.05881	6.9111	5.44992	6.21989	High_risk	1.64776
TCGA-S9-A6WP-01	1.55342	0	6.84196	6.89097	5.46969	6.09066	High_risk	1.84305
TCGA-DU-A7TB-01	4.29315	0	6.28088	6.10817	4.97457	6.15493	Low_risk	1.21385
TCGA-TM-A7CF-01	5.44932	0	7.92366	6.72085	5.80131	6.33765	Low_risk	1.12084
TCGA-FG-5964-01	4.35068	0	7.39501	7.05922	5.20991	6.11229	Low_risk	1.45292
TCGA-DU-5874-01	1.26301	0	6.9	6.78475	5.28152	6.16504	Low_risk	1.56349
TCGA-DU-6405-01	1.65753	1	6.09247	6.95217	5.48	5.95822	High_risk	2.4341
TCGA-HT-7609-01	3.83288	0	6.96665	7.02047	5.28556	6.19283	High_risk	1.70081
TCGA-TM-A84S-01	1.24384	0	7.08843	6.92679	5.08397	5.91052	Low_risk	1.55503
TCGA-DU-8168-01	1.18082	0	7.45473	6.63128	5.49583	6.05166	Low_risk	1.28432
TCGA-FG-A87N-01	1.55342	0	7.14323	6.09598	5.93478	6.01336	Low_risk	1.3505
TCGA-DB-5278-01	7.59452	0	7.58704	6.61139	5.55738	6.16762	Low_risk	1.16883
TCGA-FG-A4MY-01	1.97534	0	6.61573	7.21877	5.5323	6.70094	High_risk	1.99493
TCGA-TQ-A7RF-01	1.78082	0	6.34531	7.49301	5.48366	6.37253	High_risk	2.5133
TCGA-FG-6692-01	1.53699	1	5.20409	6.88621	5.81246	5.69152	High_risk	3.28284
TCGA-DU-7013-01	0.736986	1	6.38744	6.82814	5.36758	5.72812	High_risk	2.18736
TCGA-P5-A733-01	1.13425	0	7.34243	6.89284	5.3406	5.71885	Low_risk	1.6264
TCGA-CS-4938-01	9.79178	0	6.7869	7.22451	5.13845	6.25813	High_risk	1.85171
TCGA-DB-A64O-01	2.12329	1	6.63819	6.72034	5.3021	5.96452	High_risk	1.78632
TCGA-HW-8320-01	3.33425	0	7.06882	6.81194	5.68822	6.3429	High_risk	1.65595
TCGA-DU-6542-01	0.2	0	7.22382	6.80664	5.77163	6.14884	High_risk	1.70192
TCGA-S9-A6WL-01	2.59178	0	7.98512	7.27148	5.51463	6.20104	Low_risk	1.40703
TCGA-TM-A7C5-01	4.10959	0	7.18982	6.46479	5.43412	5.74834	Low_risk	1.42336
TCGA-DU-5854-01	0.70411	0	6.61131	6.97697	5.13038	6.06937	High_risk	1.84853
TCGA-DU-A7T8-01	11.5863	1	7.16713	6.43819	5.58108	5.93753	Low_risk	1.41962
TCGA-DU-7019-01	2.19178	0	7.57753	7.41046	5.61336	6.04409	High_risk	1.91484
TCGA-DU-7299-01	3.66849	1	7.03864	6.7139	5.13196	5.89108	Low_risk	1.45509
TCGA-DU-7006-01	0.956164	1	6.42006	7.75349	5.20413	5.97485	High_risk	2.68804
TCGA-S9-A6WH-01	3.2137	0	7.20611	7.03449	5.2311	6.40461	Low_risk	1.42408
TCGA-S9-A7QX-01	1.54521	0	6.87454	6.56239	5.40073	6.09159	Low_risk	1.51271
TCGA-P5-A5EV-01	0.0191781	0	6.97105	6.55677	5.95966	6.29819	High_risk	1.70857
TCGA-DU-6400-01	0.10137	1	7.46315	7.07235	5.46334	6.51824	Low_risk	1.3881
TCGA-VV-A86M-01	1.33425	0	6.19275	6.46726	5.48519	5.61803	High_risk	2.14796
TCGA-QH-A6X9-01	0.158904	0	7.25408	6.29369	5.3589	5.76558	Low_risk	1.18814
TCGA-HT-A618-01	1.40274	0	6.92356	6.54828	4.70761	5.57355	Low_risk	1.27338
TCGA-FG-6691-01	3.44384	0	6.97233	6.45932	5.38459	5.83667	Low_risk	1.48096
TCGA-S9-A6WI-01	7.08219	0	9.24346	6.89929	5.70085	6.40402	Low_risk	0.33827
TCGA-DU-7011-01	8.76712	1	7.56665	6.76758	5.18501	5.75481	Low_risk	1.26665
TCGA-QH-A6X5-01	1.36164	0	7.01369	6.42593	4.79781	5.99761	Low_risk	0.971362
TCGA-HW-7493-01	5.7726	0	7.64325	7.042	4.82913	5.62012	Low_risk	1.27505
TCGA-CS-6667-01	4.02466	0	7.54491	7.46465	5.04974	6.51692	Low_risk	1.38654
TCGA-DU-6406-01	1.40274	1	5.92718	6.16366	5.66825	6.03664	High_risk	1.98596
TCGA-DU-A7TA-01	7.0274	0	7.59184	7.24964	5.68284	6.3377	High_risk	1.67914
TCGA-QH-A6X4-01	1.21096	0	7.20647	6.95355	5.20751	6.36505	Low_risk	1.36249
TCGA-TQ-A7RR-01	2.15616	0	7.21044	6.45374	4.39263	5.95789	Low_risk	0.627693
TCGA-HT-8104-01	1.01918	0	6.68475	6.98668	5.58652	5.88682	High_risk	2.19298
TCGA-HT-A74K-01	1.27945	0	6.43012	7.08393	5.29909	5.98626	High_risk	2.19775
TCGA-DB-A64X-01	1.54247	0	7.28441	7.06591	5.35093	6.22677	Low_risk	1.56354
TCGA-HT-8107-01	0.0383562	0	9.13147	6.77848	5.57653	6.54045	Low_risk	0.165046
TCGA-FG-A710-01	3.05479	0	7.45054	6.59946	5.22397	6.14552	Low_risk	1.04039
TCGA-QH-A6CX-01	1.01918	1	6.65765	7.84123	4.97277	5.8843	High_risk	2.50383
TCGA-CS-6666-01	3.91233	0	6.06368	7.09616	6.2381	6.19008	High_risk	2.94572
TCGA-TM-A7CA-01	2.89863	0	7.28911	6.42049	5.61354	6.20898	Low_risk	1.21844
TCGA-HW-7486-01	4.71507	0	7.19428	6.94564	5.1286	6.35756	Low_risk	1.31644
TCGA-QH-A6X8-01	1.39452	0	7.09955	7.06758	5.69705	6.5485	High_risk	1.74905
TCGA-DU-A76K-01	0.950685	1	7.65454	6.6912	5.45797	6.32628	Low_risk	1.04987
TCGA-DB-A4XD-01	3.31507	0	6.89564	6.23184	5.29903	6.10099	Low_risk	1.16276
TCGA-DH-A669-01	2.51781	1	6.51329	7.33165	6.11005	6.17184	High_risk	2.77912
TCGA-WY-A858-01	3.66301	0	6.84712	6.64759	5.44603	5.76225	High_risk	1.78707
TCGA-DU-7294-01	7.86027	0	6.79713	6.40072	5.17979	5.81843	Low_risk	1.4204
TCGA-TM-A7C3-01	4.56438	1	6.4241	6.32943	5.37442	5.58591	High_risk	1.83545
TCGA-WY-A85E-01	1.73425	0	7.91465	6.02895	5.36137	5.77747	Low_risk	0.555412
TCGA-DU-7304-01	1.94247	1	7.65147	7.30801	5.04435	5.92467	Low_risk	1.47609
TCGA-HT-7882-01	0.309589	1	7.41494	7.91433	4.99411	5.29505	High_risk	2.38543
TCGA-HT-7608-01	1.83836	0	7.19854	7.3019	4.63534	6.25757	Low_risk	1.3308
TCGA-CS-5395-01	1.75068	1	6.14497	6.57805	5.37504	5.79747	High_risk	2.10943
TCGA-DU-6402-01	0.586301	1	6.12508	7.23611	5.67681	5.85993	High_risk	2.81711
TCGA-VM-A8CE-01	3.26301	0	6.8478	6.8446	5.00032	6.25557	Low_risk	1.41922
TCGA-HT-7467-01	0.00821918	0	7.89326	7.06357	5.00633	6.3014	Low_risk	0.920417
TCGA-DB-A4XC-01	3.89315	0	7.13604	6.59572	5.37787	5.99134	Low_risk	1.40893
TCGA-S9-A6TZ-01	3.06849	0	7.23128	6.92083	5.02289	6.00958	Low_risk	1.37313
TCGA-HT-A61C-01	1.47123	1	6.11833	7.10678	6.17058	5.60557	High_risk	3.15887
TCGA-HT-A5R7-01	1.68493	0	8.37419	6.72202	5.61329	6.35339	Low_risk	0.709615
TCGA-DH-A7UT-01	1.45479	1	6.993	6.54231	4.85441	5.95055	Low_risk	1.13748
TCGA-QH-A6CW-01	1.13425	0	6.71222	6.68981	4.29977	5.94684	Low_risk	1.07651
TCGA-FG-A4MW-01	1.53151	1	6.52141	7.10266	5.48506	6.09415	High_risk	2.2234
TCGA-P5-A5ET-01	0	0	7.37431	6.45936	5.6833	6.30184	Low_risk	1.19638
TCGA-TM-A84Q-01	2.11507	0	7.2479	6.84835	5.66661	5.86802	High_risk	1.78834
TCGA-DH-5144-01	2.04932	0	6.65389	6.66901	5.31084	6.13955	High_risk	1.65611
TCGA-E1-5303-01	5.62192	1	6.82853	7.0609	4.76267	5.92604	Low_risk	1.61152
TCGA-TQ-A7RP-01	2.50411	0	6.63637	7.37089	4.78332	5.6406	High_risk	2.1335
TCGA-E1-5318-01	6.51781	1	6.13023	7.07929	5.5401	6.14169	High_risk	2.46297
TCGA-S9-A7QY-01	2.36438	0	7.32113	6.78187	5.38917	6.03783	Low_risk	1.4275
TCGA-FG-5962-01	3.98082	0	8.0476	6.94668	5.46017	6.22392	Low_risk	1.05969
TCGA-DB-A75K-01	1.00822	0	7.11198	7.49923	5.1528	6.60182	High_risk	1.71201
TCGA-RY-A845-01	1.63288	0	7.43252	6.36449	5.10061	5.97894	Low_risk	0.863155
TCGA-DU-7012-01	0.545205	1	6.06465	7.3676	5.04405	5.64447	High_risk	2.65665
TCGA-HT-A619-01	1.78356	0	6.12975	6.35086	6.10127	5.99025	High_risk	2.3116
TCGA-DU-6397-01	3.83836	1	6.94951	7.27333	5.35662	6.30992	High_risk	1.90471
TCGA-DU-A7T6-01	1.49863	1	6.78456	6.40382	5.81154	5.94541	High_risk	1.77735
TCGA-E1-A7Z6-01	2.69589	1	7.57288	7.13798	4.86096	6.13835	Low_risk	1.1667
TCGA-DU-7007-01	5.24658	1	9.06387	7.76978	5.11377	5.80323	Low_risk	1.06421
TCGA-WH-A86K-01	1.10959	0	7.12201	6.7161	5.24668	5.77644	Low_risk	1.53396
TCGA-DU-7008-01	13.0192	0	7.28416	6.12839	5.68495	5.98762	Low_risk	1.13919
TCGA-HT-7693-01	1.46027	0	7.19187	7.08025	5.37307	6.11932	High_risk	1.6995
TCGA-IK-7675-01	1.58356	1	6.595	5.98392	5.75739	5.96923	Low_risk	1.5115
TCGA-S9-A7R3-01	8.25479	0	6.85382	6.83085	5.03566	6.06016	Low_risk	1.52162
TCGA-HT-7480-01	6.26575	0	7.56818	6.74861	5.28409	6.28892	Low_risk	1.0562
TCGA-FG-5965-01	3.06849	1	7.22421	6.61383	4.89043	6.07452	Low_risk	1.01317
TCGA-W9-A837-01	4.25479	0	8.12127	6.70846	5.2371	6.0925	Low_risk	0.74083
TCGA-HT-7485-01	0.334247	0	6.90396	7.33195	4.96086	5.96275	High_risk	1.89286
TCGA-HT-8011-01	1.35342	0	6.7027	7.98374	6.01722	5.89616	High_risk	3.25909
TCGA-DU-A7TC-01	3.11507	0	8.07724	6.62315	5.67305	6.16878	Low_risk	0.944358
TCGA-DU-A76R-01	1.77534	1	7.79992	7.34802	4.82999	6.19098	Low_risk	1.1479
TCGA-DH-5140-01	1.66301	1	6.8583	5.92009	5.60583	6.14232	Low_risk	1.11303
TCGA-TM-A84F-01	4.92055	0	7.08363	6.77923	5.15664	5.6635	Low_risk	1.60543
TCGA-HT-8563-01	2.35616	0	6.81905	7.21864	5.01089	5.83864	High_risk	1.94718
TCGA-HT-7691-01	0.00821918	0	7.7322	7.33684	4.44326	5.52773	Low_risk	1.25232
TCGA-P5-A72X-01	1.10411	0	7.2794	7.3283	5.6507	6.17973	High_risk	1.99452
TCGA-HT-7611-01	4.8	0	7.07765	7.26982	4.4975	6.11522	Low_risk	1.36072
TCGA-FG-6690-01	3.54521	0	6.9491	6.41334	4.95132	5.82624	Low_risk	1.18377
TCGA-HT-7681-01	3.72329	0	8.16924	6.89792	5.34164	6.12783	Low_risk	0.913845
TCGA-DU-6408-01	9.50685	1	7.46469	6.82098	5.61377	6.13823	Low_risk	1.4653
TCGA-RY-A840-01	2.33973	0	6.77697	6.77091	5.58192	6.06091	High_risk	1.87396
TCGA-HT-A5RC-01	0.443836	1	6.24568	6.8642	5.21844	6.16186	High_risk	1.99956
TCGA-HT-7860-01	0.0410959	0	6.67792	6.43089	5.0488	6.61937	Low_risk	1.04791
TCGA-E1-A7YH-01	7.76712	1	6.95934	6.45131	4.64767	6.26519	Low_risk	0.799695
TCGA-S9-A6WM-01	1.65479	0	5.80085	6.98321	5.53294	6.20114	High_risk	2.55917
TCGA-S9-A6U6-01	2.92877	0	7.45218	6.39167	5.35891	5.81048	Low_risk	1.12093
TCGA-HW-7489-01	3.45753	1	8.5519	6.83756	5.57319	6.33726	Low_risk	0.672973
TCGA-QH-A65S-01	0.210959	0	6.80228	6.31469	5.17227	5.90296	Low_risk	1.3021
TCGA-QH-A6CS-01	1.61096	0	6.7142	7.1695	5.42146	6.0471	High_risk	2.1378
TCGA-S9-A6UA-01	0.487671	1	6.63532	7.25258	5.86226	5.91402	High_risk	2.60331
TCGA-HT-A617-01	1.34521	0	6.93085	7.41563	5.29261	5.83286	High_risk	2.22042
TCGA-HT-7602-01	2.48767	0	6.93613	6.86732	4.68726	5.89969	Low_risk	1.35189
TCGA-HW-8322-01	2.07671	0	6.73973	6.11391	5.36315	5.97729	Low_risk	1.26687
TCGA-FG-8182-01	1.13973	0	6.98374	6.29538	5.33225	5.94524	Low_risk	1.25535
TCGA-DU-8165-01	1.59452	0	6.22338	6.73332	5.8588	5.89772	High_risk	2.44924
TCGA-S9-A6UB-01	10.3041	0	6.6119	6.75013	5.27922	5.97681	High_risk	1.80614
TCGA-HT-A61A-01	0.531507	0	8.92168	6.59512	5.77494	6.35563	Low_risk	0.366524
TCGA-KT-A7W1-01	1.2	0	5.47188	6.49064	5.95326	5.77532	High_risk	2.84605
TCGA-DU-A76O-01	1.43014	0	7.09954	6.42725	5.62137	6.00051	Low_risk	1.44885
TCGA-HT-7877-01	0.0109589	0	7.59821	6.44485	5.02893	6.06694	Low_risk	0.734989
TCGA-QH-A6X3-01	0.857534	0	7.35594	7.00822	5.69553	5.97053	High_risk	1.81845
TCGA-P5-A5F0-01	0.786301	0	7.79067	6.49437	5.62902	6.10661	Low_risk	1.02226
TCGA-S9-A6TS-01	5.18082	1	7.69541	6.62032	5.60225	6.23494	Low_risk	1.10435
TCGA-HT-7690-01	0.00821918	0	7.52321	6.98963	5.42798	5.56371	High_risk	1.72222
TCGA-DU-8166-01	1.4137	0	7.53397	6.56699	5.24891	6.03015	Low_risk	1.03365
TCGA-HT-7476-01	0.545205	0	7.71774	6.7405	5.60409	5.78903	Low_risk	1.40394
TCGA-DU-6401-01	7.28767	1	7.13345	7.18362	4.97367	6.43249	Low_risk	1.41026
TCGA-DH-5142-01	5.32329	0	6.86528	6.91782	5.40199	5.88319	High_risk	1.90661
TCGA-DU-6404-01	11.1452	1	6.15422	6.72869	5.35861	6.15945	High_risk	2.03948
TCGA-DB-A64Q-01	0.49863	0	6.63791	6.37865	5.66288	5.74163	High_risk	1.85174
TCGA-TQ-A7RO-01	2.6	0	7.29319	6.46003	5.44825	6.04939	Low_risk	1.21816
TCGA-CS-6670-01	3.90685	0	7.42613	6.62572	5.36029	6.33031	Low_risk	1.0756
TCGA-DB-A64R-01	2.61644	0	7.0138	6.30393	5.18898	6.07949	Low_risk	1.08595
TCGA-QH-A65R-01	1.26301	0	7.26503	6.76377	5.17269	6.05657	Low_risk	1.29932
TCGA-HT-A74L-01	0.920548	0	7.21649	6.28479	4.80753	6.03035	Low_risk	0.72057
TCGA-CS-4944-01	5.00822	0	6.92279	6.99353	4.54897	5.7987	Low_risk	1.42154
TCGA-HT-7676-01	0.0136986	0	6.56226	6.36083	5.27846	5.45648	High_risk	1.77452
TCGA-VV-A829-01	3.08767	0	7.05177	6.99912	5.10012	6.30685	Low_risk	1.45524
TCGA-P5-A5EU-01	0	0	5.73804	7.37712	5.9874	6.20618	High_risk	3.20721
TCGA-DU-5872-01	1.45753	0	7.11117	7.26925	5.58825	6.39898	High_risk	1.90634
TCGA-P5-A72Z-01	0.969863	0	6.24224	6.9287	5.7376	6.51181	High_risk	2.2198
TCGA-TM-A84J-01	2.0137	0	5.83581	5.73378	6.15065	5.98885	High_risk	2.03143
TCGA-HT-7879-01	0.306849	0	6.45505	6.14912	5.43136	5.99707	Low_risk	1.50865
TCGA-HT-A616-01	0.150685	0	8.23743	6.61814	5.38479	6.10908	Low_risk	0.682369
TCGA-P5-A5EX-01	0.665753	0	6.84417	8.51218	5.02995	6.28493	High_risk	2.77078
TCGA-FG-A713-01	1.70411	0	8.94567	6.95189	5.59872	6.3975	Low_risk	0.505033
TCGA-P5-A5F6-01	0.106849	0	7.33409	7.88842	5.83336	4.45414	High_risk	3.36374
TCGA-DH-A7UV-01	1.55068	0	7.09816	6.68697	5.48082	6.07368	Low_risk	1.53298
TCGA-S9-A6U1-01	2.15068	0	6.74101	6.59669	5.61614	6.04275	High_risk	1.78699
TCGA-S9-A6U0-01	2.03288	1	5.93332	6.8466	5.09086	5.97325	High_risk	2.19048
TCGA-DU-5847-01	1.50137	0	5.9413	7.09011	5.6236	5.78026	High_risk	2.81905
TCGA-S9-A6U5-01	2.71781	0	6.81188	7.18342	4.9922	5.9735	High_risk	1.84603
TCGA-DU-6394-01	1.86849	1	6.92404	7.41378	5.43543	6.10449	High_risk	2.18413
TCGA-HT-A5RB-01	0.00821918	0	7.22466	6.57616	5.75128	6.11664	Low_risk	1.51801
TCGA-TM-A84H-01	2.53699	0	7.01063	6.62446	5.11175	6.15722	Low_risk	1.2589
TCGA-VM-A8C9-01	3.6	0	6.2888	6.76595	4.61307	5.63378	High_risk	1.75762
TCGA-P5-A5EY-01	0.19726	0	7.55541	6.76842	5.01236	6.07417	Low_risk	1.00854
TCGA-S9-A7R8-01	2.63288	1	6.69477	6.44123	5.74911	5.96195	High_risk	1.81563
TCGA-HT-7471-01	0.0109589	0	6.60003	7.00401	5.43046	6.13349	High_risk	2.0402
TCGA-HW-A5KK-01	1.06301	1	6.60019	6.9374	4.8191	6.01083	High_risk	1.65093
TCGA-E1-A7YQ-01	4.32329	1	6.15568	8.02958	5.83206	5.93774	High_risk	3.50017
TCGA-HT-A61B-01	1.46027	0	6.65552	6.69591	5.63795	5.70405	High_risk	2.0985
TCGA-DB-5275-01	3.99452	0	7.77073	6.7793	5.3715	6.18591	Low_risk	1.05988
TCGA-E1-A7YJ-01	1.62192	1	6.28831	7.89393	5.472	6.30592	High_risk	2.897
TCGA-FG-6688-01	1.56438	0	6.42898	7.45476	5.14448	5.78896	High_risk	2.49294
TCGA-TM-A84M-01	2.06575	0	6.84632	6.58997	5.57776	5.85112	High_risk	1.78323
TCGA-FG-A6J1-01	1.36986	0	6.35164	6.09611	4.62042	6.04393	Low_risk	0.984621
TCGA-QH-A65Z-01	1.16986	0	7.1285	6.74428	5.48151	6.36105	Low_risk	1.42165
TCGA-VM-A8CD-01	0.657534	1	6.70715	8.76735	5.85543	5.80003	High_risk	3.83001
TCGA-HT-8019-01	2.75068	0	9.06217	6.60346	5.72948	6.5663	Low_risk	0.153772
TCGA-QH-A6CV-01	1.21096	0	5.67857	6.82548	5.61777	5.67599	High_risk	2.81748
TCGA-FG-A6IZ-01	1.25205	0	6.45152	6.56777	4.86418	6.24779	Low_risk	1.36095
TCGA-P5-A5F1-01	0.490411	0	6.75491	7.16866	4.92081	5.97659	High_risk	1.82235
TCGA-P5-A72U-01	0.0191781	0	6.34531	7.00795	5.28362	6.08074	High_risk	2.13414
TCGA-CS-4943-01	3.03014	1	7.92254	6.80923	6.116	5.99572	Low_risk	1.56126
TCGA-P5-A5EW-01	0.558904	0	7.12014	6.82581	5.17114	6.31183	Low_risk	1.31601
TCGA-HT-8018-01	3.15616	1	8.60092	6.78272	5.34181	6.25637	Low_risk	0.487657
TCGA-HT-7482-01	8.91233	0	7.03317	7.00133	4.95058	6.01371	Low_risk	1.51384
TCGA-E1-A7YY-01	12.1781	1	9.26282	6.78386	5.90926	6.66817	Low_risk	0.239937
TCGA-DU-A5TR-01	2.48767	0	6.46486	7.11475	5.07922	5.84623	High_risk	2.12648
TCGA-VM-A8CB-01	0.00821918	0	7.70155	7.22848	5.47831	6.55316	Low_risk	1.35692
TCGA-E1-5311-01	11.189	1	7.77901	7.16201	5.13998	6.39562	Low_risk	1.11234
TCGA-E1-A7Z2-01	1.09041	1	7.48892	6.74898	5.3804	6.66496	Low_risk	0.986731
TCGA-DB-A75P-01	1.34795	0	7.68005	7.26644	5.27741	6.23238	Low_risk	1.42636
TCGA-TM-A84T-01	1.98356	0	6.77592	6.36254	5.65701	5.80571	High_risk	1.71725
TCGA-FG-A4MT-01	3.18904	0	6.4208	6.43366	5.70859	6.51631	High_risk	1.68759
TCGA-DU-A5TW-01	2.08219	0	6.2312	6.91178	5.91311	6.01209	High_risk	2.56797
TCGA-DU-A6S2-01	2.12877	0	8.22538	6.91477	5.40693	6.08943	Low_risk	0.952864
TCGA-DU-6395-01	4.08493	1	7.42641	7.09678	5.00651	6.23152	Low_risk	1.27449
TCGA-FG-8189-01	1.87671	0	9.15139	6.68344	6.10865	6.69958	Low_risk	0.342585
TCGA-CS-4941-01	0.641096	1	6.63366	7.8021	5.61896	6.24836	High_risk	2.72864
TCGA-HT-7684-01	0.50411	0	7.56684	7.31531	4.85736	5.83839	Low_risk	1.45612
TCGA-RY-A83Z-01	0.824658	0	6.49032	6.14625	5.73939	5.01578	High_risk	2.1574
TCGA-S9-A6U9-01	7.99452	0	7.00298	7.05827	4.7427	5.9495	Low_risk	1.47554
TCGA-S9-A6TW-01	3.42466	0	6.77691	6.93521	5.71066	5.76824	High_risk	2.23104
TCGA-S9-A7J2-01	0.169863	0	6.96491	6.7448	5.55794	6.184	High_risk	1.65981
TCGA-DU-5870-01	15.1945	0	6.79377	6.47356	5.26577	6.00226	Low_risk	1.44789
TCGA-DB-A64P-01	2.50959	0	7.08121	7.18619	5.55215	6.09106	High_risk	1.98374
TCGA-DU-7014-01	9.78356	1	6.66736	6.60098	5.55157	5.77766	High_risk	1.92317
TCGA-HT-7884-01	0.939726	0	7.30136	6.26573	4.75891	6.11284	Low_risk	0.580608
TCGA-CS-5397-01	0.531507	1	7.71771	6.69702	5.40608	5.96503	Low_risk	1.15597
TCGA-DU-5853-01	1.11507	0	6.85621	6.53051	5.18703	5.94939	Low_risk	1.42928
TCGA-HT-7902-01	2.61918	0	7.18666	6.71889	4.89544	6.31488	Low_risk	1.00851
TCGA-HW-7495-01	2.95342	0	7.9936	6.81934	5.10654	6.306	Low_risk	0.722948
TCGA-HT-7677-01	1.35342	0	6.86783	6.76176	5.04032	6.08424	Low_risk	1.44848
TCGA-F6-A8O3-01	0.0191781	0	7.44255	6.54769	5.53524	6.04754	Low_risk	1.25203
TCGA-P5-A730-01	0.912329	0	7.20321	7.49334	4.90313	6.30065	Low_risk	1.63429
TCGA-DU-A5TY-01	2.83014	1	6.67344	6.7423	5.44098	5.45566	High_risk	2.11752
TCGA-HT-8015-01	0.00821918	0	8.62144	6.83135	5.79667	6.33578	Low_risk	0.769289
TCGA-DU-6393-01	4.34247	1	6.86247	7.0266	4.78545	6.31563	Low_risk	1.38894
TCGA-TQ-A7RS-01	0	0	6.82057	6.65757	5.08624	6.35374	Low_risk	1.29358
TCGA-E1-A7YU-01	0.0630137	1	7.41073	6.37995	5.17756	6.31327	Low_risk	0.777392
TCGA-CS-5394-01	0.0219178	0	6.99506	7.06084	5.69655	6.11412	High_risk	2.01892
TCGA-HT-7688-01	2.6411	0	8.82211	6.87611	5.6845	6.21413	Low_risk	0.665623
TCGA-DH-A7US-01	1.93425	0	6.73601	6.71705	5.18665	6.21951	Low_risk	1.52439
TCGA-DU-7302-01	5.02466	0	8.31002	6.70339	5.49471	6.29888	Low_risk	0.684705
TCGA-KT-A74X-01	1.2	0	6.98917	6.29776	5.60363	6.09364	Low_risk	1.35736
TCGA-RY-A83X-01	2.5726	0	6.9295	6.72008	5.58521	6.25364	Low_risk	1.64609
TCGA-HT-A5R9-01	0.00547945	0	6.32625	6.15331	5.70522	5.64314	High_risk	1.94089
TCGA-S9-A6WD-01	6.27123	0	7.04842	6.80093	5.31888	6.10769	Low_risk	1.5351
TCGA-F6-A8O4-01	0.0164384	0	8.02852	6.57824	5.49936	6.15029	Low_risk	0.835551
TCGA-TQ-A7RV-01	5.11781	0	7.20239	6.59737	5.52474	6.1121	Low_risk	1.40503
TCGA-FG-7637-01	3.33973	0	6.7657	6.63734	5.12409	5.64405	High_risk	1.67924
TCGA-FG-6689-01	1.24384	0	7.75035	6.81384	4.84515	6.14977	Low_risk	0.778124
TCGA-E1-A7YO-01	6.25205	1	7.71003	7.1049	4.84132	6.308	Low_risk	0.959155
TCGA-FG-7638-01	1.87945	0	7.41081	6.82997	5.28336	6.24377	Low_risk	1.24205
TCGA-S9-A7QZ-01	2.26301	0	7.34944	6.38107	5.24389	6.27941	Low_risk	0.876019
TCGA-P5-A5F2-01	0.663014	0	7.56136	7.23252	5.19238	6.49374	Low_risk	1.29238
TCGA-E1-A7YS-01	1.27671	1	6.6189	7.30523	5.15625	6.60909	High_risk	1.86421
TCGA-HT-7880-01	0.443836	0	8.26632	6.75831	5.37525	6.34157	Low_risk	0.658671
TCGA-DU-5852-01	0.561644	1	6.94255	7.01595	5.81112	6.34892	High_risk	1.97622
TCGA-E1-A7Z4-01	12.0877	1	6.91668	6.72117	4.93416	5.59902	Low_risk	1.55105
TCGA-DU-7298-01	1.57808	1	7.38345	6.83391	6.10542	6.16857	High_risk	1.82959
TCGA-HT-7478-01	0.531507	0	7.33073	6.80519	4.39073	5.69354	Low_risk	0.96198
TCGA-DU-A5TU-01	2.18082	0	7.9559	6.51221	6.45009	6.06744	Low_risk	1.48191
TCGA-DU-6399-01	5.47945	1	6.67085	6.76092	5.52927	6.03987	High_risk	1.90878
TCGA-RY-A83Y-01	0.454795	0	7.01271	6.77301	5.11371	6.1001	Low_risk	1.40622
TCGA-DU-7300-01	5.16712	1	7.94502	7.2141	5.3293	6.09221	Low_risk	1.3189
TCGA-S9-A7IX-01	2.24384	1	7.87153	6.88354	5.76572	6.1099	Low_risk	1.37185
TCGA-HT-8558-01	1.14521	0	9.09867	6.77094	5.89892	6.53282	Low_risk	0.391439
TCGA-S9-A7IY-01	1.9589	0	7.2356	7.24593	5.1866	6.25502	Low_risk	1.61957
TCGA-DB-A64W-01	1.2	1	7.90073	6.11952	5.9631	5.99893	Low_risk	0.918673
TCGA-S9-A7IZ-01	1.66575	0	7.94905	6.88293	5.19475	6.13032	Low_risk	0.944092
TCGA-DU-6410-01	0.663014	0	7.37922	6.53715	5.7728	5.99874	Low_risk	1.46032
TCGA-DB-5270-01	10.2274	0	8.36475	7.05457	5.42498	6.32632	Low_risk	0.875132
TCGA-WY-A859-01	3.32329	0	8.56449	6.41463	5.85044	6.51138	Low_risk	0.418972
TCGA-HT-7483-01	14.3973	0	7.82582	6.86616	6.13656	6.03889	High_risk	1.66035
TCGA-VW-A7QS-01	1.93425	0	7.74833	7.41399	6.2322	6.81302	High_risk	1.83825
TCGA-RY-A843-01	0.172603	0	7.92069	6.56385	5.29154	5.9918	Low_risk	0.834134
TCGA-QH-A65V-01	1.05205	0	6.95952	6.97349	5.28274	6.01082	High_risk	1.75357
TCGA-S9-A7R7-01	8.21918	0	7.05928	7.68499	4.57317	6.0718	High_risk	1.77681
TCGA-HT-7610-01	4.67397	0	8.40286	6.59528	5.56436	6.28211	Low_risk	0.592281
TCGA-DU-7009-01	12.863	1	7.5363	6.67178	5.33545	6.00202	Low_risk	1.18614
TCGA-DB-5274-01	6.27123	0	5.26406	5.29055	4.80727	5.73906	Low_risk	1.28675
TCGA-S9-A6U8-01	8.1863	1	6.89096	6.86144	5.12549	6.00724	Low_risk	1.60651
TCGA-E1-5305-01	6.66575	1	7.27259	6.93702	5.58092	6.39236	Low_risk	1.53553
TCGA-FG-A60K-01	1.48493	0	6.67312	6.51933	5.14365	5.99868	Low_risk	1.48349
TCGA-HT-7687-01	0.00821918	0	7.49533	6.73166	4.94993	5.89092	Low_risk	1.06493
TCGA-HT-7607-01	0.263014	1	8.70918	6.98937	5.50891	6.29417	Low_risk	0.675837
TCGA-DU-5871-01	1.57808	0	7.10356	7.20158	5.31061	6.2409	High_risk	1.7537
TCGA-IK-8125-01	3.56438	0	7.62956	6.55873	5.21754	5.91786	Low_risk	1.00094
TCGA-R8-A6MO-01	2.72055	0	6.77706	6.79143	4.69748	6.05545	Low_risk	1.32199
TCGA-P5-A780-01	0.19726	0	7.23298	6.77032	5.53684	6.18067	Low_risk	1.4999
TCGA-QH-A6XC-01	1.39178	0	7.82438	6.73232	5.65824	6.01999	Low_risk	1.25364
TCGA-E1-A7YD-01	1.19178	1	6.11481	6.52947	5.45595	6.07055	High_risk	2.00947
TCGA-E1-A7YI-01	0.30411	1	5.84713	5.9817	6.31622	5.72362	High_risk	2.4593
TCGA-DU-8158-01	0.424658	1	6.61973	7.61005	5.17063	6.09259	High_risk	2.36838
TCGA-S9-A6WN-01	2.20548	0	6.95981	7.35379	4.81846	5.75026	High_risk	1.88612
TCGA-HT-7855-01	1.60274	0	7.15057	7.23944	5.17501	6.45869	Low_risk	1.56184
TCGA-HT-8111-01	0.0191781	0	7.16504	7.17827	4.96991	5.94978	Low_risk	1.617
TCGA-WY-A85C-01	3.90685	0	6.93544	6.31477	5.20669	5.77755	Low_risk	1.30131
TCGA-DU-A5TP-01	2.7726	0	6.77193	7.07873	6.08014	5.78057	High_risk	2.58249
TCGA-S9-A7IS-01	0.660274	1	6.39671	6.31769	6.20301	6.41295	High_risk	1.97846
TCGA-DU-A6S7-01	1.74795	0	6.76671	6.48041	5.4554	5.91221	Low_risk	1.6364
TCGA-DU-6396-01	6.26301	1	7.20433	6.72596	4.84456	6.29053	Low_risk	0.982031
TCGA-S9-A7QW-01	1.25479	0	7.33237	6.24729	5.38557	5.9762	Low_risk	1.01695
TCGA-FG-7643-01	1.67397	0	8.39215	6.76723	5.41947	6.34466	Low_risk	0.613831
TCGA-S9-A7R4-01	2.50411	0	7.29437	6.88271	5.21979	5.71801	Low_risk	1.57082
TCGA-DU-A6S8-01	1.85753	0	6.8481	6.88662	5.53718	6.07695	High_risk	1.88589
TCGA-HT-7601-01	0.419178	0	6.97624	6.81841	5.15875	5.97875	Low_risk	1.55347
TCGA-HT-7854-01	3.29041	0	7.18996	7.66925	4.5333	5.9367	High_risk	1.72154
TCGA-HW-7487-01	3.7863	0	8.28823	7.0818	5.36438	6.23267	Low_risk	0.951305
TCGA-FG-5963-01	2.12329	1	6.95469	7.18224	5.32217	6.07251	High_risk	1.92053
TCGA-HT-A5RA-01	2.27945	0	5.3828	7.43605	5.71351	6.20291	High_risk	3.3027
TCGA-HT-A4DV-01	2.16986	0	7.48059	6.96725	5.29298	6.40614	Low_risk	1.23658
TCGA-DH-A66G-01	1.43288	0	7.92434	6.65651	5.39446	5.99977	Low_risk	0.969143
TCGA-DU-7015-01	7.56438	0	6.48464	6.87805	5.13464	5.67466	High_risk	2.04194
TCGA-R8-A73M-01	4.94795	0	6.89851	6.45562	5.3994	6.25352	Low_risk	1.33244
TCGA-TQ-A7RJ-01	3.36712	0	7.37534	6.75919	5.29475	6.07615	Low_risk	1.29566
TCGA-DU-A7TJ-01	0.0465753	0	6.31794	6.79931	5.78532	6.12272	High_risk	2.2868
TCGA-HT-7606-01	1.4411	0	6.63468	6.25603	6.11733	5.9067	High_risk	1.96858
TCGA-VM-A8C8-01	3.8274	0	7.02139	6.72114	4.69507	5.79996	Low_risk	1.23371
TCGA-DB-A4XG-01	6.07945	0	7.57342	6.40353	5.44521	6.09667	Low_risk	0.971685
TCGA-HT-8114-01	2.84932	0	7.39946	6.75837	4.94194	5.98709	Low_risk	1.09507
TCGA-S9-A6TU-01	7.26027	0	6.89847	7.39627	5.48735	6.28471	High_risk	2.1325
TCGA-HT-7616-01	0.0191781	1	7.32475	7.83139	5.03445	6.15238	High_risk	1.98689
TCGA-HT-8010-01	0.136986	0	7.79924	6.74506	5.06603	5.82813	Low_risk	0.990053
TCGA-DH-A7UU-01	1.14247	0	6.91919	5.97061	6.05509	6.14185	Low_risk	1.40582
TCGA-E1-A7Z3-01	6.12329	1	8.60631	6.94517	5.53789	6.37411	Low_risk	0.684921
TCGA-E1-A7YM-01	1.77534	1	7.10938	6.7518	5.34847	6.21887	Low_risk	1.42255
TCGA-S9-A6WG-01	7.12877	0	7.29669	7.0067	5.35143	5.45469	High_risk	1.88161
TCGA-HW-8319-01	3.31233	1	7.55056	6.16674	5.32297	6.10211	Low_risk	0.713593
TCGA-TM-A84R-01	1.55068	0	9.09644	6.94671	5.65668	6.4369	Low_risk	0.424487
TCGA-DU-A6S3-01	1.79726	0	7.85045	6.68639	5.39128	6.1947	Low_risk	0.943395
TCGA-P5-A5F4-01	0.632877	0	7.93073	6.72949	5.78417	6.22111	Low_risk	1.16862
TCGA-DB-A75M-01	1.49041	0	7.02983	7.14612	5.00107	6.316	Low_risk	1.51915
TCGA-E1-5304-01	3.4274	1	6.26931	5.89319	5.87924	6.55346	Low_risk	1.43933
TCGA-DB-A75L-01	0.936986	0	7.48864	5.90983	5.42914	5.95598	Low_risk	0.684592
TCGA-P5-A735-01	0.8	0	7.09555	6.65501	5.5416	6.20179	Low_risk	1.48617
TCGA-HT-7479-01	3.36164	0	6.78162	6.97639	4.72146	5.88218	Low_risk	1.56747
TCGA-HT-7477-01	2.02192	0	6.75292	6.53965	6.40447	6.05074	High_risk	2.2387
TCGA-TM-A84O-01	2.76986	1	7.25675	6.23843	5.15646	5.82792	Low_risk	0.98106
TCGA-DH-5141-01	2.65205	0	7.06296	7.52897	5.26564	6.26646	High_risk	2.00176
TCGA-FG-8186-01	1.33425	0	7.15161	6.76605	5.03307	5.92211	Low_risk	1.34728
TCGA-HT-8012-01	0.783562	0	7.11625	6.81243	5.02409	6.42458	Low_risk	1.15821
TCGA-HT-7686-01	3.56164	0	7.02766	6.6809	4.45739	5.83895	Low_risk	1.025
TCGA-HT-7475-01	1.45205	0	7.81004	6.53461	5.72111	6.0823	Low_risk	1.11374
TCGA-FG-A87Q-01	0.476712	0	7.02248	6.93986	5.04293	6.2047	Low_risk	1.43832
TCGA-S9-A6TX-01	3.41096	0	7.16068	7.22323	5.37306	6.19823	High_risk	1.79621
TCGA-HT-8013-01	5.29589	1	6.48666	6.70604	5.48437	5.72997	High_risk	2.1011
TCGA-TM-A7C4-01	4.0274	0	8.12556	6.33673	5.43256	5.97221	Low_risk	0.622813
TCGA-DH-5143-01	3.83836	0	7.17841	7.0225	5.25244	6.16963	Low_risk	1.55918
TCGA-DB-5277-01	4.23836	1	7.3935	6.61906	6.0522	6.11323	Low_risk	1.64245
TCGA-FG-8181-01	2.36164	0	9.24477	6.75484	5.6929	6.5563	Low_risk	0.142256
TCGA-DB-A4XE-01	3.12055	0	7.73444	6.21583	5.65197	6.10217	Low_risk	0.850025
TCGA-DU-7290-01	0.863014	1	6.07838	7.01221	4.92673	5.63376	High_risk	2.29095
TCGA-P5-A77X-01	0.287671	0	7.80041	6.54884	5.31017	6.02917	Low_risk	0.8916
TCGA-HW-7490-01	3.8	0	7.28677	7.81927	5.50497	6.22424	High_risk	2.27008
TCGA-HT-8564-01	1.30959	0	8.06347	6.98916	5.64487	6.67867	Low_risk	0.983412
TCGA-HT-7856-01	3.25753	0	8.27014	7.01765	5.54448	6.5172	Low_risk	0.889722
TCGA-HT-7692-01	0.246575	0	6.80761	6.24114	5.03361	5.24394	Low_risk	1.46847
TCGA-QH-A6CZ-01	0.764384	0	8.00355	6.3886	5.35371	6.12691	Low_risk	0.615619
TCGA-TQ-A7RG-01	1.6411	0	6.82416	6.39616	5.10669	5.95578	Low_risk	1.28614
TCGA-DB-A64V-01	2.43562	0	6.69609	7.36093	4.93813	6.04677	High_risk	1.99157
TCGA-HT-8113-01	2.46575	0	9.09976	6.78933	5.57508	6.41312	Low_risk	0.254334
TCGA-TM-A84C-01	1.34795	1	6.82695	6.6011	5.30616	5.64522	High_risk	1.72852
TCGA-DB-5280-01	3.04658	0	6.99334	6.7936	5.4177	6.0246	High_risk	1.66778
TCGA-TQ-A7RH-01	1.33151	0	7.24903	6.52663	5.42705	5.86343	Low_risk	1.37581
TCGA-RY-A847-01	2.55616	0	7.71738	6.48796	5.2424	5.86547	Low_risk	0.930071
TCGA-HW-A5KL-01	2.40548	0	6.75148	6.31041	5.25373	5.84371	Low_risk	1.41182
TCGA-DU-8163-01	1.72329	0	6.87153	6.64846	5.25448	5.94223	Low_risk	1.56175
TCGA-HT-7603-01	1.93151	0	9.06879	6.83435	5.73856	5.94634	Low_risk	0.641278
TCGA-HT-8105-01	0.520548	0	8.01254	7.26804	4.81509	5.91837	Low_risk	1.07194
TCGA-P5-A72W-01	0.868493	0	7.5275	6.95619	5.19261	6.2232	Low_risk	1.22181
TCGA-FG-8191-01	2.71781	0	7.10162	6.73861	4.78524	5.65419	Low_risk	1.32606
TCGA-TM-A84L-01	3.40274	1	7.12905	7.01105	5.11602	6.10825	Low_risk	1.52255
TCGA-TM-A84G-01	3.3863	0	6.85742	6.56144	5.46898	6.40775	Low_risk	1.41395
TCGA-DB-5273-01	6.83014	0	7.23038	7.09882	4.98231	5.81832	Low_risk	1.58344
TCGA-HT-8108-01	0.208219	0	6.93285	6.10507	4.97809	5.81573	Low_risk	0.967825
TCGA-S9-A7J1-01	0.682192	0	6.84811	6.71075	5.05014	5.9975	Low_risk	1.46803
TCGA-HT-A5R5-01	0.0109589	0	7.45436	7.10786	4.94661	5.93792	Low_risk	1.3691
TCGA-P5-A781-01	0.367123	0	7.52464	6.56369	5.22113	5.80416	Low_risk	1.12815
TCGA-FN-7833-01	2.29315	0	6.86276	6.71138	5.11728	6.01924	Low_risk	1.49217
TCGA-E1-A7YV-01	2.70411	1	7.16331	6.1288	5.53796	6.36648	Low_risk	0.937427
TCGA-FG-8187-01	1.67397	0	6.95335	6.75248	4.60735	5.95947	Low_risk	1.16799
TCGA-VM-A8CH-01	1.95616	0	7.24996	7.014	5.36123	6.07304	Low_risk	1.6243
TCGA-E1-5319-01	7.96438	1	6.97435	7.49241	4.82984	6.32415	High_risk	1.71869
TCGA-DU-6403-01	0.969863	1	6.70726	6.56144	5.61346	6.16572	High_risk	1.7186
TCGA-DU-6392-01	17.5973	0	6.27993	6.79496	5.98229	6.84147	High_risk	2.08695
TCGA-HT-7881-01	2.95616	0	8.32884	6.86183	5.22163	6.22498	Low_risk	0.659995
TCGA-HW-7491-01	5.69315	0	7.10291	6.54219	5.56609	6.115	Low_risk	1.44837
TCGA-DB-A4XH-01	2.63562	0	7.04459	6.58093	5.08836	5.99048	Low_risk	1.26796
TCGA-P5-A736-01	0.630137	0	6.84916	7.36074	4.95242	5.77167	High_risk	2.03742
TCGA-DB-A64U-01	2.31781	0	6.96813	6.62475	5.2807	6.28516	Low_risk	1.33309
TCGA-FG-A6J3-01	1.85479	0	7.03035	6.00641	4.50684	5.67261	Low_risk	0.591904
TCGA-E1-A7YW-01	3.06849	1	7.27879	6.65294	5.00201	6.08272	Low_risk	1.07848
TCGA-DH-A66F-01	1.43288	0	6.97441	7.01355	5.15151	6.15508	Low_risk	1.62203
TCGA-FG-7641-01	1.71781	0	8.15744	6.7556	5.26208	6.27486	Low_risk	0.684089
TCGA-HW-A5KM-01	1.72603	0	7.02665	6.54932	5.17204	5.76445	Low_risk	1.41704
TCGA-P5-A737-01	1.01918	0	7.02608	6.72072	5.2389	5.88194	Low_risk	1.54195
TCGA-TQ-A7RI-01	0.169863	0	7.06605	6.53717	5.18591	6.2886	Low_risk	1.13807
TCGA-DU-A6S6-01	7.92603	0	8.25149	6.64903	5.6891	6.47932	Low_risk	0.715965
TCGA-P5-A731-01	0.750685	0	7.75964	6.74507	5.30675	5.86016	Low_risk	1.1549

## Sheet: Table S7_2
Table S7_2 Cox analysis of glioma.
Mult_cox	p.value	round.summary.cox1...7.....2...5.	round.summary.cox1...8.....3...5.	round.summary.cox1...8.....4...5.
GABARAPL1	<0.0001	0.5334	0.43711	0.65091
SQSTM1	<0.0001	2.2393	1.75848	2.85158
PGAM5	5e-05	1.90735	1.3954	2.60713
ATG9A	0.00112	0.6167	0.46109	0.82482

## Sheet: Table S7_3
Table S7_3 Riskscores of uveal melanoma.
Patients	Times	Status	GABARAPL1	SQSTM1	ATG9A	Risk	RiskScore
TCGA-VD-A8KG-01	0.0520548	0	6.86685	8.25572	6.57382	Low_risk	-15.1026
TCGA-V4-A9EF-01	3.19178	0	5.29207	8.08655	6.01128	High_risk	-11.2946
TCGA-WC-AA9E-01	2.29589	0	6.60349	7.08205	6.10051	Low_risk	-14.9931
TCGA-VD-A8KK-01	0.175342	0	4.65026	7.85036	5.62278	High_risk	-9.69488
TCGA-V4-A9EK-01	2.81644	0	7.36976	7.95146	6.67321	Low_risk	-16.5297
TCGA-VD-AA8M-01	0.0164384	0	7.00047	7.90751	6.30594	Low_risk	-15.3579
TCGA-V4-A9EI-01	1.06575	1	5.18963	8.22413	6.00019	High_risk	-10.95
TCGA-VD-AA8N-01	0.120548	0	4.78733	8.28629	6.05674	High_risk	-10.1272
TCGA-WC-A882-01	3.04658	0	6.1787	8.17209	6.96631	Low_risk	-14.2132
TCGA-WC-A888-01	1.57534	1	6.02616	8.34692	5.63264	High_risk	-12.1447
TCGA-V4-A9F5-01	0.556164	0	4.78182	7.96177	5.81863	High_risk	-10.1083
TCGA-VD-AA8T-01	0.134247	0	6.00198	8.47386	5.72441	High_risk	-12.0956
TCGA-VD-AA8R-01	0.0164384	0	7.15851	8.02481	5.41979	Low_risk	-14.5225
TCGA-V4-A9F4-01	1.73699	0	6.60526	7.83643	5.95761	Low_risk	-14.1781
TCGA-VD-AA8O-01	1.66027	1	5.16844	9.1752	5.80611	High_risk	-9.85705
TCGA-VD-A8KN-01	0.186301	0	6.09948	8.59054	6.20457	Low_risk	-12.7749
TCGA-YZ-A983-01	2.1863	0	6.48944	7.8006	5.53951	Low_risk	-13.4658
TCGA-V4-A9EY-01	2.29315	0	6.91687	8.76729	6.97154	Low_risk	-15.2453
TCGA-VD-A8KM-01	0.0109589	0	5.82943	8.40277	5.9215	High_risk	-12.034
TCGA-VD-AA8S-01	1.16986	0	7.03263	8.42177	7.29669	Low_risk	-16.173
TCGA-VD-A8KJ-01	3.15068	0	5.76153	7.41592	6.03616	Low_risk	-12.8769
TCGA-WC-A881-01	2.91781	0	5.67175	7.06822	5.36521	High_risk	-12.1829
TCGA-WC-AA9A-01	1.2411	1	4.8972	8.18875	5.57775	High_risk	-9.86455
TCGA-WC-A87Y-01	3.6	1	6.71362	8.91753	5.92048	Low_risk	-13.4317
TCGA-VD-AA8P-01	0.235616	0	4.90628	7.55755	6.36548	High_risk	-11.3705
TCGA-V4-A9E9-01	3.4137	0	6.00387	8.5431	5.8253	High_risk	-12.1613
TCGA-V4-A9EU-01	1.94247	0	6.14991	9.0676	6.23188	High_risk	-12.5034
TCGA-VD-A8KF-01	0.109589	1	5.97883	8.00315	5.6685	High_risk	-12.3841
TCGA-V4-A9E8-01	2.2137	1	5.80789	8.03224	6.45495	Low_risk	-12.9474
TCGA-V4-A9EJ-01	2.04384	0	7.2818	8.61786	6.07718	Low_risk	-15.0595
TCGA-V4-A9F7-01	3.4411	0	6.77454	7.45607	5.64232	Low_risk	-14.4782
TCGA-V4-A9F1-01	2.56986	0	5.92524	8.71429	6.26839	High_risk	-12.3826
TCGA-VD-A8K9-01	3.90137	0	6.52749	7.96555	5.50329	Low_risk	-13.3601
TCGA-V4-A9F0-01	2.58904	1	5.6837	8.03406	5.77281	High_risk	-11.8685
TCGA-VD-A8K8-01	3.7726	1	6.08656	8.39266	5.77622	High_risk	-12.4035
TCGA-V4-A9E5-01	6.84658	0	6.63714	8.49935	6.70005	Low_risk	-14.567
TCGA-V4-A9EM-01	2.64658	0	6.56169	9.40432	6.25744	Low_risk	-13.1023
TCGA-V3-A9ZX-01	1.28767	0	5.8353	8.68892	6.19719	High_risk	-12.1317
TCGA-V4-A9E7-01	1.13699	1	5.39014	8.59822	6.08423	High_risk	-11.1473
TCGA-VD-A8KD-01	0.312329	1	5.73012	8.24957	5.17133	High_risk	-11.0582
TCGA-VD-A8KO-01	2.17808	0	6.15909	7.48608	5.31976	Low_risk	-12.7842
TCGA-VD-A8KB-01	3.70959	0	6.2283	7.89112	6.04894	Low_risk	-13.4562
TCGA-V4-A9EO-01	2.11781	0	6.49342	8.91581	5.96049	Low_risk	-13.0228
TCGA-V4-A9ES-01	4.13973	0	5.93592	8.29919	5.63874	High_risk	-12.0051
TCGA-V4-A9ED-01	2.95342	0	5.99134	8.30763	6.14936	Low_risk	-12.7262
TCGA-WC-A885-01	1.87945	0	6.55308	8.47714	6.07648	Low_risk	-13.6626
TCGA-WC-A880-01	3.44658	0	7.00104	7.71495	5.86595	Low_risk	-14.9961
TCGA-VD-A8KE-01	2.24932	0	6.66846	8.53044	6.1672	Low_risk	-13.9659
TCGA-WC-A87U-01	4.33151	1	6.55795	7.32516	5.55094	Low_risk	-14.03
TCGA-V4-A9EE-01	1.09041	1	5.6526	8.06023	5.6761	High_risk	-11.6652
TCGA-VD-A8K7-01	3.99726	0	6.85237	8.28079	5.38987	Low_risk	-13.6297
TCGA-V3-A9ZY-01	1.25753	0	6.47116	8.48958	6.24424	Low_risk	-13.6828
TCGA-V4-A9F2-01	2.01096	0	5.69004	7.66282	5.7935	High_risk	-12.225
TCGA-WC-A88A-01	0.224658	1	5.02245	7.75899	5.70871	High_risk	-10.6511
TCGA-YZ-A982-01	1.35616	0	5.9955	7.66351	7.31419	Low_risk	-14.6857
TCGA-YZ-A985-01	3.24384	0	5.52941	8.45206	6.21578	High_risk	-11.7205
TCGA-V4-A9EA-01	3.69315	0	6.15378	8.61688	6.9771	Low_risk	-13.7927
TCGA-WC-A87T-01	7.12329	0	7.09786	7.48513	4.55962	Low_risk	-13.8266
TCGA-RZ-AB0B-01	0.408219	1	5.94642	8.91855	5.86274	High_risk	-11.7646
TCGA-YZ-A980-01	5.10137	0	7.91808	7.94771	6.18605	Low_risk	-17.0895
TCGA-VD-AA8Q-01	1.74247	1	5.47934	6.91991	5.46119	High_risk	-12.0248
TCGA-WC-A884-01	0.0328767	0	6.64464	8.20068	6.32098	Low_risk	-14.3838
TCGA-VD-A8KH-01	3.1726	0	6.21649	8.70989	5.48921	High_risk	-12.0573
TCGA-V4-A9EV-01	3.47671	1	6.0896	8.59763	5.6713	High_risk	-12.1081
TCGA-VD-A8KI-01	3.04932	1	5.38769	8.71967	6.77197	High_risk	-11.8636
TCGA-V4-A9EQ-01	1.24658	1	5.22784	8.83846	6.66773	High_risk	-11.3039
TCGA-V4-A9ET-01	3.73151	0	5.86971	7.8054	5.95188	Low_risk	-12.6668
TCGA-YZ-A984-01	3.82466	1	6.01899	8.80902	6.38118	High_risk	-12.6319
TCGA-V4-A9F3-01	2.39178	1	5.8975	8.49302	5.89527	High_risk	-12.0668
TCGA-VD-A8KA-01	3.2274	0	6.66453	8.53941	6.57472	Low_risk	-14.4392
TCGA-V4-A9EX-01	2	1	5.4071	8.2873	6.08828	High_risk	-11.4542
TCGA-WC-A883-01	0.660274	1	5.14616	8.11608	5.99639	High_risk	-10.9476
TCGA-V4-A9EH-01	1.83562	0	6.71166	8.14441	6.08693	Low_risk	-14.2906
TCGA-V4-A9EL-01	2.69041	0	5.68143	8.63387	5.82622	High_risk	-11.4134
TCGA-V4-A9EC-01	2.03562	0	4.69144	8.20579	6.00737	High_risk	-9.93738
TCGA-V4-A9F8-01	1.63562	0	4.94139	8.42211	6.3405	High_risk	-10.672
TCGA-VD-A8KL-01	1.74795	0	4.91956	8.1356	6.44141	High_risk	-10.9935
TCGA-V4-A9EZ-01	1.6411	0	6.50495	9.05926	7.11096	Low_risk	-14.3048
TCGA-V4-A9EW-01	3.31781	0	6.60916	8.35848	5.50969	Low_risk	-13.2007
TCGA-WC-A87W-01	4.66575	0	6.80378	6.68005	5.97244	Low_risk	-15.6011

## Sheet: Table S7_4
Table S7_4 Cox analysis of uveal melanoma.
Mult_cox	p.value	round.summary.cox1...7.....2...5.	round.summary.cox1...8.....3...5.	round.summary.cox1...8.....4...5.
GABARAPL1	<0.0001	0.12474	0.05252	0.29629
SQSTM1	0.07914	2.35806	0.90502	6.14404
ATG9A	0.03938	0.30106	0.09609	0.94328

## Sheet: Table S7_5
Table S7_5 Riskscores of acute myeloid leukemia.
Patients	Times	Status	GABARAPL1	SQSTM1	Risk	RiskScore
TCGA-AB-2849-03	6.08219	0	4.6705	5.31931	Low_risk	1.54013
TCGA-AB-2808-03	7.83836	0	4.44832	5.12793	Low_risk	1.49557
TCGA-AB-2873-03	0.747945	0	6.39629	6.10713	Low_risk	1.56099
TCGA-AB-2934-03	0.0767123	0	4.91598	6.38906	High_risk	1.98892
TCGA-AB-2900-03	0.50411	1	5.52333	6.61716	High_risk	1.97338
TCGA-AB-2877-03	1.74795	0	5.58249	6.14177	Low_risk	1.74022
TCGA-AB-2823-03	0	1	5.28311	5.66636	Low_risk	1.57891
TCGA-AB-2835-03	4.58356	0	4.84976	6.24485	High_risk	1.93505
TCGA-AB-2885-03	0.586301	1	4.53185	5.52331	Low_risk	1.66289
TCGA-AB-2810-03	0.0849315	1	5.05948	6.35774	High_risk	1.94557
TCGA-AB-2910-03	0	1	3.86747	5.58277	High_risk	1.82372
TCGA-AB-2991-03	5.00274	0	5.96105	6.06722	Low_risk	1.62965
TCGA-AB-2883-03	2	0	3.40193	5.29184	Low_risk	1.78159
TCGA-AB-2933-03	0.334247	1	4.09855	5.57649	Low_risk	1.77448
TCGA-AB-2874-03	1.08493	0	4.80221	6.35988	High_risk	1.99813
TCGA-AB-2856-03	0.410959	1	4.65183	6.112	High_risk	1.91288
TCGA-AB-2826-03	2.00274	1	4.78328	5.75574	Low_risk	1.72069
TCGA-AB-3000-03	3.42192	0	3.83696	6.01542	High_risk	2.03124
TCGA-AB-2955-03	1.33973	1	3.46735	5.12096	Low_risk	1.68894
TCGA-AB-2925-03	0.665753	1	4.19152	6.18359	High_risk	2.03846
TCGA-AB-2889-03	0.832877	0	5.06722	5.92937	Low_risk	1.74461
TCGA-AB-2911-03	3.24932	0	5.29314	6.47725	High_risk	1.95438
TCGA-AB-2830-03	0.753425	1	4.28689	5.6784	High_risk	1.78417
TCGA-AB-2805-03	1.58082	1	4.97113	6.15638	High_risk	1.86955
TCGA-AB-2970-03	0.835616	1	4.14682	5.66568	High_risk	1.80633
TCGA-AB-3001-03	4.33151	0	5.40298	5.87446	Low_risk	1.65176
TCGA-AB-3011-03	5.16438	0	4.18746	6.23806	High_risk	2.06463
TCGA-AB-2990-03	1.25205	0	4.428	5.439	Low_risk	1.64446
TCGA-AB-2866-03	0.419178	1	3.54679	6.23162	High_risk	2.19004
TCGA-AB-2942-03	1.75616	0	5.49642	5.67858	Low_risk	1.54185
TCGA-AB-2935-03	0.167123	1	5.30388	5.89851	Low_risk	1.68282
TCGA-AB-2976-03	2.50685	1	4.25857	5.7985	High_risk	1.84576
TCGA-AB-3007-03	4.33151	0	5.1295	5.12512	Low_risk	1.35775
TCGA-AB-2959-03	1.33973	1	4.94992	5.14225	Low_risk	1.40171
TCGA-AB-2981-03	1.33425	0	5.97553	5.90742	Low_risk	1.55235
TCGA-AB-2845-03	0.832877	1	4.10929	5.53804	Low_risk	1.75443
TCGA-AB-2914-03	2.16986	0	4.36873	5.5401	Low_risk	1.70339
TCGA-AB-2956-03	0.50137	1	4.71032	5.8119	Low_risk	1.76146
TCGA-AB-2820-03	0	1	3.51433	5.38093	High_risk	1.80054
TCGA-AB-2901-03	0.161644	0	2.86072	6.11575	High_risk	2.2736
TCGA-AB-2924-03	0.246575	0	4.95639	6.4902	High_risk	2.0279
TCGA-AB-2912-03	0.750685	1	4.56832	5.15495	Low_risk	1.4841
TCGA-AB-2876-03	3.33973	0	4.55952	5.94585	High_risk	1.85404
TCGA-AB-2821-03	2.25205	1	5.15327	6.22222	High_risk	1.86369
TCGA-AB-2986-03	0.580822	1	4.07056	6.11887	High_risk	2.03257
TCGA-AB-2917-03	3.33151	0	4.22292	4.81632	Low_risk	1.39569
TCGA-AB-2937-03	0.589041	1	1.48782	6.15556	High_risk	2.56728
TCGA-AB-2927-03	0.246575	1	5.65581	5.75837	Low_risk	1.54705
TCGA-AB-2915-03	0	1	6.53586	6.71495	High_risk	1.81597
TCGA-AB-3008-03	2.25205	1	3.37492	5.74016	High_risk	1.9957
TCGA-AB-2949-03	1.91507	0	5.26876	5.75434	Low_risk	1.62275
TCGA-AB-2859-03	0.832877	1	4.26437	6.27626	High_risk	2.067
TCGA-AB-2811-03	0.665753	1	6.38709	8.12427	High_risk	2.50184
TCGA-AB-2966-03	2.33973	1	4.23395	5.61377	Low_risk	1.7647
TCGA-AB-2950-03	0.838356	0	2.45125	5.33634	High_risk	1.99284
TCGA-AB-2977-03	0.0849315	1	5.82389	6.87036	High_risk	2.031
TCGA-AB-2882-03	1	1	4.74729	6.49185	High_risk	2.07058
TCGA-AB-2983-03	0.917808	1	3.63454	5.56789	High_risk	1.86347
TCGA-AB-2920-03	1.00274	1	3.46168	6.70015	High_risk	2.4252
TCGA-AB-2987-03	0.50411	1	6.25236	6.10363	Low_risk	1.58821
TCGA-AB-2908-03	0.0849315	1	4.65984	5.72407	Low_risk	1.73069
TCGA-AB-2982-03	0.410959	0	5.91058	5.17152	Low_risk	1.22281
TCGA-AB-2894-03	0.49589	1	4.32541	5.946	High_risk	1.90103
TCGA-AB-2936-03	0.161644	0	4.78755	5.72461	Low_risk	1.70535
TCGA-AB-2813-03	0.0849315	1	5.44526	5.16381	Low_risk	1.31247
TCGA-AB-2897-03	0.665753	0	6.17919	7.57107	High_risk	2.28599
TCGA-AB-2892-03	2.58356	0	4.52357	5.9659	High_risk	1.87058
TCGA-AB-2863-03	0.0849315	1	4.82372	5.80371	Low_risk	1.73492
TCGA-AB-2888-03	0.915068	0	7.48882	5.73189	Low_risk	1.16736
TCGA-AB-2822-03	2.66575	1	4.09746	6.17906	High_risk	2.0552
TCGA-AB-2948-03	1.58904	1	4.99872	6.24756	High_risk	1.90646
TCGA-AB-2818-03	0.830137	1	5.57291	6.10487	Low_risk	1.72496
TCGA-AB-2939-03	1.24658	0	3.57986	4.87884	Low_risk	1.55367
TCGA-AB-2840-03	0.0767123	1	5.8752	5.29408	Low_risk	1.28695
TCGA-AB-2875-03	0.580822	0	2.15273	5.72446	High_risk	2.23334
TCGA-AB-2965-03	0.917808	1	4.65064	5.46991	Low_risk	1.61422
TCGA-AB-2846-03	3.8411	1	5.56651	5.5362	Low_risk	1.46153
TCGA-AB-2898-03	1.07671	0	4.48659	6.17386	High_risk	1.97479
TCGA-AB-2999-03	4.75342	0	6.18667	5.36068	Low_risk	1.25553
TCGA-AB-2919-03	0.167123	0	4.87861	6.15531	High_risk	1.88759
TCGA-AB-2841-03	3.83836	1	5.34693	6.06244	Low_risk	1.7505
TCGA-AB-2893-03	0.580822	1	5.23378	5.74465	Low_risk	1.62525
TCGA-AB-2853-03	0.243836	1	4.49239	5.7326	Low_risk	1.76822
TCGA-AB-2867-03	0.50411	1	4.94663	6.15003	High_risk	1.8715
TCGA-AB-3002-03	3.92055	1	5.62695	6.12775	Low_risk	1.72478
TCGA-AB-2871-03	0.419178	0	4.65049	6.07391	High_risk	1.89542
TCGA-AB-2896-03	0.586301	1	4.15773	5.69435	High_risk	1.81749
TCGA-AB-2973-03	1.66849	1	4.71632	6.45519	High_risk	2.05972
TCGA-AB-2952-03	0.0849315	1	4.99287	6.3832	High_risk	1.97078
TCGA-AB-2861-03	0	1	4.03323	5.65608	High_risk	1.82463
TCGA-AB-2941-03	0	1	4.70315	6.26326	High_risk	1.97301
TCGA-AB-2878-03	1	1	4.51221	5.34273	Low_risk	1.58276
TCGA-AB-2899-03	1.83836	1	3.32487	5.43688	High_risk	1.86455
TCGA-AB-2806-03	2.58904	1	1.48686	4.96274	High_risk	2.01221
TCGA-AB-2834-03	0.671233	1	4.7159	5.4921	Low_risk	1.61147
TCGA-AB-2994-03	4.92603	0	6.03947	6.41741	Low_risk	1.77695
TCGA-AB-2984-03	3.16986	0	5.50218	5.60096	Low_risk	1.50456
TCGA-AB-2817-03	0.747945	1	3.85485	5.80224	High_risk	1.92841
TCGA-AB-2895-03	0.419178	1	4.90084	6.3421	High_risk	1.97009
TCGA-AB-2865-03	0.167123	1	4.752	6.01013	High_risk	1.84539
TCGA-AB-2869-03	0.665753	0	4.55488	6.08738	High_risk	1.92085
TCGA-AB-2862-03	3.91781	0	5.40864	5.64686	Low_risk	1.54468
TCGA-AB-2819-03	6.83836	0	2.88778	4.89983	Low_risk	1.70215
TCGA-AB-2825-03	0.580822	1	4.73942	6.39795	High_risk	2.02844
TCGA-AB-2998-03	0.0849315	1	5.96933	5.55962	Low_risk	1.3917
TCGA-AB-2938-03	0.832877	1	4.75584	6.12346	High_risk	1.89737
TCGA-AB-2979-03	1.83836	0	4.42309	6.21899	High_risk	2.00853
TCGA-AB-2971-03	2.16986	1	5.67969	6.01289	Low_risk	1.66074
TCGA-AB-2844-03	0.334247	1	4.94015	5.78936	Low_risk	1.7049
TCGA-AB-2886-03	0.49589	0	1.52388	5.93468	High_risk	2.45723
TCGA-AB-2884-03	2.00274	1	5.94084	6.18837	Low_risk	1.69009
TCGA-AB-2872-03	1.74795	0	5.37124	7.56411	High_risk	2.44467
TCGA-AB-2847-03	1.66575	1	4.44775	6.10024	High_risk	1.94831
TCGA-AB-2851-03	0.663014	1	4.81628	6.46967	High_risk	2.04642
TCGA-AB-2963-03	4.49863	1	4.23275	5.44627	Low_risk	1.68697
TCGA-AB-2932-03	0	0	5.24809	6.78464	High_risk	2.1065
TCGA-AB-2870-03	0.419178	1	4.89426	5.99285	High_risk	1.80883
TCGA-AB-2858-03	1.58082	1	1.82107	5.65562	High_risk	2.26777
TCGA-AB-2980-03	1.91507	0	5.1998	4.89446	Low_risk	1.23628
TCGA-AB-2913-03	3.33151	0	4.30869	5.62743	Low_risk	1.75608
TCGA-AB-2890-03	0	1	5.44705	5.74063	Low_risk	1.58063
TCGA-AB-2916-03	2.41644	0	5.54959	5.94305	Low_risk	1.6543
TCGA-AB-2814-03	2.16986	1	5.2638	4.88146	Low_risk	1.21741
TCGA-AB-2996-03	4.33151	0	5.01527	6.1331	High_risk	1.84986
TCGA-AB-2992-03	4.67397	1	5.01489	5.8338	Low_risk	1.71061
TCGA-AB-2836-03	1.41918	1	5.22737	6.24017	High_risk	1.8572
TCGA-AB-2839-03	1.33151	1	3.97818	5.6746	High_risk	1.84428
TCGA-AB-2931-03	0	1	4.36939	6.23248	High_risk	2.02557
TCGA-AB-2842-03	0	1	5.39135	5.72483	Low_risk	1.58444
TCGA-AB-2815-03	2.25205	1	5.50575	5.51704	Low_risk	1.46478
TCGA-AB-3009-03	1.58082	1	2.45002	5.71525	High_risk	2.16947
TCGA-AB-2828-03	6.25753	0	4.99456	5.26096	Low_risk	1.44802
TCGA-AB-2843-03	0.589041	1	4.80048	5.6666	Low_risk	1.67575
TCGA-AB-2988-03	0.0821918	1	4.32656	5.61086	Low_risk	1.74479
TCGA-AB-2929-03	0.336986	1	3.79922	5.55506	High_risk	1.8245
TCGA-AB-3012-03	5.16986	0	6.11184	5.87124	Low_risk	1.5082
TCGA-AB-2857-03	0.838356	1	5.41422	5.68286	Low_risk	1.56032
TCGA-AB-2881-03	1.07671	0	5.11091	5.99876	Low_risk	1.76816
TCGA-AB-2995-03	4.24932	0	4.53751	5.70547	Low_risk	1.74655
TCGA-AB-2812-03	1.00274	1	4.47118	5.87201	High_risk	1.83737

## Sheet: Table S7_6
Table S7_6 Cox analysis of acute myeloid leukemia.
Mult_cox	p.value	round.summary.cox1...7.....2...5.	round.summary.cox1...8.....3...5.	round.summary.cox1...8.....4...5.
GABARAPL1	0.08598	0.81839	0.65103	1.02876
SQSTM1	0.04093	1.59282	1.01938	2.48886

## Sheet: Table S7_7
Table S7_7 Riskscores of adrenocortical carcinoma.
Patients	Times	Status	SQSTM1	ATG9A	Risk	RiskScore
TCGA-OR-A5LR-01	2.33699	0	8.84877	5.19097	Low_risk	-1.1733
TCGA-OR-A5JX-01	2.60274	0	7.3772	5.33837	High_risk	-0.135104
TCGA-OU-A5PI-01	3.20822	0	9.34948	5.83903	Low_risk	-0.944128
TCGA-OR-A5JA-01	2.52603	1	6.95458	6.06949	High_risk	0.737629
TCGA-OR-A5KY-01	1.07123	1	7.4094	5.98015	High_risk	0.380228
TCGA-OR-A5L9-01	2.3863	0	7.3744	3.87504	Low_risk	-1.35404
TCGA-PK-A5H9-01	1.68767	0	7.23179	6.06735	High_risk	0.563439
TCGA-OR-A5JK-01	4.10137	0	7.54122	5.13116	Low_risk	-0.409968
TCGA-OR-A5LJ-01	3.0274	1	8.11879	4.72311	Low_risk	-1.10957
TCGA-OR-A5K9-01	0.942466	1	7.60276	6.10496	High_risk	0.364079
TCGA-OR-A5LA-01	1.96986	0	8.42635	4.85198	Low_risk	-1.19336
TCGA-OR-A5JP-01	1.27123	0	7.20205	5.99662	High_risk	0.522923
TCGA-OR-A5LO-01	6.58904	1	7.69895	5.94581	High_risk	0.171497
TCGA-P6-A5OG-01	1.04932	1	6.94502	5.31748	High_risk	0.116267
TCGA-OR-A5J6-01	7.40548	0	8.01216	6.1534	High_risk	0.149858
TCGA-OR-A5LT-01	1.50411	0	8.03084	5.32946	Low_risk	-0.549064
TCGA-OR-A5JY-01	1.51233	1	8.16806	6.71336	High_risk	0.520008
TCGA-OR-A5JV-01	5.54247	0	9.2	5.28687	Low_risk	-1.31175
TCGA-OR-A5JT-01	2.48493	0	9.33128	5.36173	Low_risk	-1.33096
TCGA-OR-A5KX-01	3.73699	0	7.46368	6.41492	High_risk	0.709148
TCGA-OR-A5K3-01	9.49315	0	7.7687	5.3158	Low_risk	-0.397428
TCGA-OR-A5JZ-01	2.25205	0	8.99195	4.98052	Low_risk	-1.43791
TCGA-OR-A5LC-01	0.435616	1	7.0586	5.83825	High_risk	0.480033
TCGA-OR-A5LH-01	6.53425	1	9.50634	5.64017	Low_risk	-1.20757
TCGA-OR-A5LM-01	5.09041	0	7.64622	5.6126	High_risk	-0.0736642
TCGA-OR-A5J5-01	1	1	6.92684	5.49378	High_risk	0.274634
TCGA-P6-A5OF-01	0.567123	1	7.28275	5.89653	High_risk	0.389246
TCGA-OR-A5LD-01	3.27945	1	5.44893	5.9031	High_risk	1.53527
TCGA-OR-A5L3-01	12.6795	0	8.47149	5.49176	Low_risk	-0.687741
TCGA-OR-A5LK-01	7.50685	0	8.85971	4.33326	Low_risk	-1.89559
TCGA-OR-A5LG-01	4.35342	0	8.64986	6.36165	High_risk	-0.0730371
TCGA-OR-A5KO-01	3.87397	0	7.38918	5.18442	High_risk	-0.270976
TCGA-OR-A5JJ-01	1.34247	1	7.07971	5.51022	High_risk	0.193271
TCGA-OR-A5JL-01	5.63288	0	8.97952	5.92129	Low_risk	-0.645409
TCGA-OR-A5KV-01	10.6247	0	7.91851	5.59483	High_risk	-0.25784
TCGA-OR-A5JE-01	5.76712	1	6.78891	6.38239	High_risk	1.10168
TCGA-PK-A5HB-01	3.54247	0	6.58111	6.77241	High_risk	1.55627
TCGA-OR-A5JM-01	1.53973	1	7.41108	6.20442	High_risk	0.56626
TCGA-OR-A5JD-01	8.32329	0	9.76759	5.08275	Low_risk	-1.83504
TCGA-OR-A5LN-01	6.41644	0	9.46	5.10141	Low_risk	-1.62817
TCGA-OR-A5K6-01	4.09041	0	8.19274	6.01776	High_risk	-0.0755937
TCGA-OR-A5JR-01	10.1041	0	9.25334	5.043	Low_risk	-1.54836
TCGA-OR-A5L6-01	2.3589	0	8.73395	5.17676	Low_risk	-1.11375
TCGA-OR-A5JI-01	6.3863	0	8.5708	5.24659	Low_risk	-0.954026
TCGA-OR-A5J2-01	4.59452	1	8.31694	5.86342	Low_risk	-0.281588
TCGA-OR-A5LL-01	4.41918	1	9.89823	6.4118	Low_risk	-0.807624
TCGA-OR-A5K1-01	9.01096	0	8.37647	4.66676	Low_risk	-1.31684
TCGA-PK-A5HA-01	3.29041	0	10.072	4.81885	Low_risk	-2.24451
TCGA-OR-A5K2-01	2.72329	1	6.73609	6.07163	High_risk	0.875301
TCGA-OR-A5JO-01	3.27123	0	8.0853	5.60848	Low_risk	-0.350193
TCGA-OR-A5KU-01	12.8027	0	7.13011	5.84913	High_risk	0.444641
TCGA-OR-A5LB-01	3.29863	1	8.0029	6.09934	High_risk	0.11053
TCGA-OR-A5L8-01	2.42466	0	7.9859	5.44302	Low_risk	-0.426392
TCGA-OR-A5J1-01	3.71233	1	7.51975	6.06848	High_risk	0.385284
TCGA-OR-A5K0-01	2.81918	0	7.60734	7.20342	High_risk	1.27754
TCGA-OR-A5K8-01	2.05205	0	8.08362	5.70891	High_risk	-0.265368
TCGA-OR-A5L5-01	3.60822	0	9.42198	4.71402	Low_risk	-1.92767
TCGA-OR-A5KT-01	7.93151	0	8.45051	5.54263	Low_risk	-0.632259
TCGA-OR-A5JF-01	5.52055	0	8.43176	5.69755	Low_risk	-0.491371
TCGA-OR-A5L4-01	2.64932	0	7.83765	5.3659	Low_risk	-0.398515
TCGA-OR-A5JS-01	1.04932	0	9.15197	5.49218	Low_risk	-1.11062
TCGA-OR-A5K5-01	1.36438	1	7.48253	6.74776	High_risk	0.975074
TCGA-OR-A5JG-01	1.48219	1	8.134	5.3585	Low_risk	-0.589005
TCGA-PK-A5H8-01	9.92603	0	6.78017	5.18894	High_risk	0.111572
TCGA-OR-A5LE-01	1.8137	1	7.03147	6.65768	High_risk	1.18046
TCGA-OR-A5JB-01	1.50959	1	6.99615	5.35678	High_risk	0.117253
TCGA-OR-A5J3-01	5.72877	0	7.59743	5.48778	High_risk	-0.147445
TCGA-OR-A5JQ-01	3.02192	0	9.3956	5.19313	Low_risk	-1.51161
TCGA-OR-A5J7-01	1.34247	1	7.73508	6.93512	High_risk	0.974283
TCGA-OR-A5KZ-01	0.342466	1	6.76426	5.75244	High_risk	0.591522
TCGA-OR-A5KW-01	5.68767	0	8.40394	5.77585	Low_risk	-0.408751
TCGA-PA-A5YG-01	2.07123	0	9.46109	4.8796	Low_risk	-1.81387
TCGA-OR-A5J9-01	3.70411	0	8.05794	6.04908	High_risk	0.034369
TCGA-OR-A5K4-01	2.96438	0	8.35748	5.70516	Low_risk	-0.438823
TCGA-OR-A5J8-01	1.5863	1	8.402	5.86343	Low_risk	-0.334486
TCGA-OR-A5LS-01	3.00274	0	8.01499	5.32077	Low_risk	-0.546455
TCGA-OR-A5JW-01	6.03288	0	7.44261	5.62384	High_risk	0.062345
TCGA-OR-A5JC-01	4.79452	1	7.54698	5.29391	Low_risk	-0.277783
TCGA-OR-A5LP-01	5.08767	0	10.0435	5.21517	Low_risk	-1.89617

## Sheet: Table S7_8
Table S7_8 Cox analysis of adrenocortical carcinoma.
Mult_cox	p.value	round.summary.cox1...7.....2...5.	round.summary.cox1...8.....3...5.	round.summary.cox1...8.....4...5.
SQSTM1	0.00582	0.5369	0.34507	0.83536
ATG9A	0.02021	2.30292	1.13906	4.65596

## Sheet: Table S7_9
Table S7_9 Riskscores of mesothelioma.
Patients	Times	Status	PGAM5	ATG9A	Risk	RiskScore
TCGA-3H-AB3S-01	1.05479	1	5.22593	5.27451	Low_risk	9.64839
TCGA-LK-A4O6-01	1.2274	1	4.50777	4.91216	Low_risk	8.70471
TCGA-3H-AB3L-01	0.989041	1	6.0043	4.7292	Low_risk	9.68205
TCGA-MQ-A4LJ-01	1.94247	1	4.97035	5.47518	Low_risk	9.66012
TCGA-TS-A8AI-01	0.89863	1	5.8054	5.40345	High_risk	10.2375
TCGA-TS-A7P1-01	1.54247	1	5.86045	5.02785	High_risk	9.88448
TCGA-XT-AASU-01	0.389041	1	5.57119	5.50659	High_risk	10.1631
TCGA-YS-A95B-01	0.106849	1	5.63268	5.8122	High_risk	10.5334
TCGA-TS-A7P6-01	0.775342	1	5.34625	4.74828	Low_risk	9.18758
TCGA-UD-AABY-01	2.30959	1	4.94462	5.195	Low_risk	9.34457
TCGA-LK-A4NZ-01	0.668493	1	4.90577	4.89372	Low_risk	8.9965
TCGA-LK-A4O4-01	2.6	1	5.98545	4.05267	Low_risk	8.95394
TCGA-SC-A6LN-01	1.13425	1	5.391	5.72808	High_risk	10.2557
TCGA-UD-AAC1-01	2.16164	1	5.54183	5.13206	High_risk	9.7452
TCGA-TS-A7P7-01	1.61918	1	6.14157	5.39463	High_risk	10.4911
TCGA-YS-A95C-01	0.364384	1	4.93419	4.20774	Low_risk	8.29538
TCGA-SC-A6LM-01	2.4137	1	5.774	4.87304	Low_risk	9.65363
TCGA-TS-A8AS-01	2.17808	1	5.91802	4.14085	Low_risk	8.9942
TCGA-UD-AAC4-01	1.96986	1	5.61506	5.78023	High_risk	10.4859
TCGA-TS-A7PB-01	2.69041	1	5.21861	4.45475	Low_risk	8.77825
TCGA-3H-AB3X-01	4.08219	0	4.87068	5.08594	Low_risk	9.17175
TCGA-LK-A4O2-01	0.156164	1	6.16337	4.90094	High_risk	9.98754
TCGA-MQ-A4KX-01	6.73699	1	5.58372	5.39151	High_risk	10.0515
TCGA-SC-A6LQ-01	0.813699	1	5.87246	4.83477	Low_risk	9.69027
TCGA-3H-AB3O-01	3.56712	1	4.89865	4.98188	Low_risk	9.08389
TCGA-MQ-A4LC-01	7.64384	1	5.10847	5.02644	Low_risk	9.29496
TCGA-YS-AA4M-01	0.230137	1	5.78136	5.33527	High_risk	10.1468
TCGA-LK-A4O7-01	0.958904	1	4.85244	5.56385	Low_risk	9.66142
TCGA-NQ-A57I-01	0.0547945	1	6.27922	5.57706	High_risk	10.7911
TCGA-UT-A88E-01	1.18904	1	5.28204	5.77503	High_risk	10.22
TCGA-SH-A7BC-01	1.99178	1	5.59305	5.28941	High_risk	9.95118
TCGA-ZN-A9VP-01	0.624658	0	5.31869	5.17786	Low_risk	9.61901
TCGA-ZN-A9VO-01	0.715068	0	5.5252	4.84523	Low_risk	9.42975
TCGA-TS-A7P3-01	1.88767	1	4.80716	5.19724	Low_risk	9.23943
TCGA-TS-A7OU-01	4.58904	1	4.86537	5.34809	Low_risk	9.44401
TCGA-SC-A6LP-01	0.213699	1	5.22238	5.57239	High_risk	9.9597
TCGA-SH-A7BD-01	1.25753	1	5.00687	5.40474	Low_risk	9.61441
TCGA-ZN-A9VQ-01	1.36712	0	5.42234	5.67368	High_risk	10.2229
TCGA-TS-A8AF-01	0.980822	1	5.44494	5.18361	High_risk	9.7238
TCGA-MQ-A6BS-01	1.66575	1	5.39893	5.09627	Low_risk	9.59572
TCGA-MQ-A4LM-01	0.432877	1	6.13329	4.83627	High_risk	9.89583
TCGA-3H-AB3K-01	4.69863	1	5.1212	4.62905	Low_risk	8.88588
TCGA-3U-A98J-01	2.03014	1	4.74631	5.7012	Low_risk	9.72325
TCGA-LK-A4NW-01	1.49589	1	5.4876	5.44007	High_risk	10.0276
TCGA-ZN-A9VV-01	3.5863	0	4.95483	5.17098	Low_risk	9.32722
TCGA-ZN-A9VU-01	2.67671	0	4.73803	4.67696	Low_risk	8.63675
TCGA-UD-AABZ-01	0.539726	1	6.4561	5.71224	High_risk	11.0719
TCGA-3U-A98G-01	1.72603	1	4.53498	5.48811	Low_risk	9.3333
TCGA-UT-A88D-01	2.25479	1	5.16679	5.29479	Low_risk	9.62352
TCGA-UT-A88C-01	2.36438	1	5.58547	5.33761	High_risk	9.99607
TCGA-ZN-A9VW-01	0.230137	1	5.3787	5.38774	High_risk	9.88725
TCGA-MQ-A6BQ-01	6.46301	0	6.06297	4.88807	High_risk	9.89545
TCGA-SC-A6LR-01	3.2	0	4.52076	4.7437	Low_risk	8.53723
TCGA-LK-A4O0-01	0.506849	1	5.65861	5.35345	High_risk	10.07
TCGA-LK-A4O5-01	1.06027	1	5.53268	5.01094	Low_risk	9.61034
TCGA-MQ-A4LV-01	0.293151	1	6.40505	5.68058	High_risk	10.9986
TCGA-UT-A88G-01	0.208219	1	6.01882	5.58091	High_risk	10.5915
TCGA-MQ-A4LP-01	1.44384	1	5.81259	5.59457	High_risk	10.4446
TCGA-3H-AB3T-01	1.13425	1	6.14909	5.65742	High_risk	10.774
TCGA-UD-AAC6-01	1.24932	1	6.03711	5.01678	High_risk	10.011
TCGA-MQ-A6BR-01	5.72603	0	4.80578	4.64876	Low_risk	8.66001
TCGA-3U-A98I-01	2.35616	1	5.06475	5.4013	Low_risk	9.65604
TCGA-3U-A98H-01	3.16712	1	5.0903	5.1451	Low_risk	9.40586
TCGA-TS-A7OZ-01	2.31233	1	5.79177	5.62872	High_risk	10.4644
TCGA-TS-A7OY-01	0.69863	1	5.174	5.46844	High_risk	9.81227
TCGA-ZN-A9VS-01	3.36438	0	5.11983	4.9124	Low_risk	9.18359
TCGA-UD-AAC5-01	0.693151	1	6.56311	5.22888	High_risk	10.6459
TCGA-MQ-A6BL-01	0.912329	1	5.0919	5.30004	Low_risk	9.5705
TCGA-3H-AB3U-01	2.26301	1	5.56537	5.31547	High_risk	9.95701
TCGA-3U-A98F-01	1.46849	1	5.78336	5.51991	High_risk	10.3431
TCGA-3U-A98D-01	0.389041	1	5.63747	5.30727	High_risk	10.0047
TCGA-MQ-A4LI-01	1.56712	1	5.25471	5.42502	High_risk	9.8296
TCGA-3U-A98E-01	5.24932	0	4.59329	4.37469	Low_risk	8.20484
TCGA-NQ-A638-01	0	0	4.95017	5.3352	Low_risk	9.49674
TCGA-TS-A7P8-01	1.25205	1	5.00852	4.61002	Low_risk	8.7777
TCGA-MQ-A6BN-01	2.07397	1	4.65196	4.56889	Low_risk	8.4555
TCGA-SC-AA5Z-01	1.81918	0	4.4445	5.02962	Low_risk	8.77909
TCGA-UT-A97Y-01	0.394521	1	5.7139	5.57528	High_risk	10.3471
TCGA-SH-A9CT-01	1.23014	1	5.63701	5.1918	High_risk	9.88263
TCGA-TS-A7P0-01	3.45479	1	6.16832	4.82989	High_risk	9.91649
TCGA-TS-A8AY-01	1.28493	1	6.05929	5.36881	High_risk	10.3995
TCGA-UD-AAC7-01	1.11233	1	5.43536	5.48797	High_risk	10.0372
TCGA-SH-A9CU-01	2.00548	1	5.83187	5.5391	High_risk	10.4012
TCGA-SH-A7BH-01	0.665753	1	3.8888	4.70122	Low_risk	7.99825
TCGA-3H-AB3M-01	2.42466	1	5.21837	4.90544	Low_risk	9.2533

[truncated: 1 more sheets: Table S7_10]
